# Supplementary material for: Comparative metabolomic analyses of Dendrobium officinale Kimura et Migo responding to UV-B radiation reveal variations in the metabolisms associated with its bioactive ingredients
Source: PeerJ journal article supplement (doi:10.7717/peerj.9107), 2020-06-29
Supplement: Figure_S1.pdf [file Figure_S1.pdf]

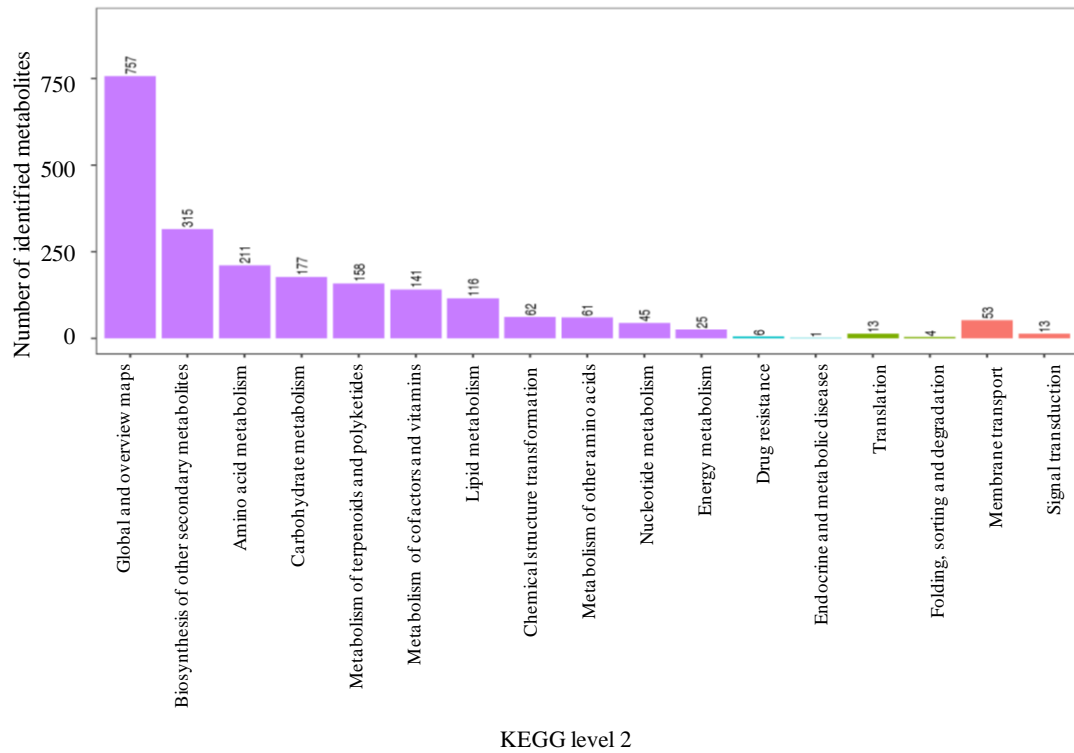

Figure S1 KEGG analysis of all the identified metabolites in *D. officinale* under the control and UV-B treatment.
