# Supplementary material for: Comparative metabolomic analyses of Dendrobium officinale Kimura et Migo responding to UV-B radiation reveal variations in the metabolisms associated with its bioactive ingredients
Source: PeerJ. 2020 Jun 29;8:e9107. doi: 10.7717/peerj.9107 (PMC7331624; doi:10.7717/peerj.9107)
Supplement: Table S1 [file peerj-08-9107-s004.xlsx]

## Sheet: Sheet1
Table S1 The saw data of the qRT-PCR analysis.
Gene	Up	Down
1-Deoxy-D-xylulose-5-phosphate synthase	CTAAACGTTCAGAGAGTGAA	TATTGGTCCGTCTAGATTAG
1-Deoxy-D-xylulose-5-phosphate reductoisomerase	GAGAATCCAGATAAGTTCAG	CGGCTTCAAGCCAGCACAAC
Tryptophan synthase	CAAGAAGACTCTTCAAGCCA	TGACACGGGTTGGAGAAGAG
Strictosidine synthase	CATTGGGTCTTCGATTTAAC	GAATTATATTTTAGAAGCCT
Pyrophosphate-fructose 6-phosphate 1-phosphotransferase	GGAGCTGACCCCGGAGTTTA	TTGCATTTCAGGTCACCATC
Mannose-6-phosphate isomerase	GAAGATTTATAAGGACGCAA	GAGTTCATTTAATGCTTCAG
Xylose isomerase	CAGTAGAAATGGCCAAAAGA	CATAAACTCCAACCTCAGAG
GDP-L-fucose synthase	CAAAGTTGGCTCCGCAGCCT	GACCACCACTTCTTTTGCTC
Chalcone synthase	CACCACCAGCGGCGTAGACA	ATAACCGCTGCAGCCCCATC
Chalcone isomerase	GACCGTCATCGGAGTGTACC	AAGATTTCCAGGAACTTAAC
Flavanone 3-hydroxylase	CATGGAGACGAAGCAGGCTT	CCCTCGATCCAACCCTAATC
Flavanone 4-reductase	GTTCTCATTAATCCAGAGGC	AGTCCAGTCTTCTCTGCATG
ACTIN	ACTGGAACCATCAATGTACT	GTAGATGTAAGAGATGTGGC
The saw data of the qRT-PCR analysis.
	Control			UV-B
Ct
Actin	27.74	28.01	28.23	27.95	28.04	28.01
DXS	32.67	33.23	33.65	29.54	30.14	30.73
DXR	32.02	31.86	32.52	30.48	30.31	30.24
TS	35.41	35.46	34.68	33.75	33.82	33.91
SS	32.32	33.09	32.87	31.55	31.45	31.55
PFP	34.58	34.87	34.33	30.38	30.2	29.99
MPI	37.78	37.9	37.55	33.32	33.76	33.28
XI	33.35	33.6	33.52	35.68	35.37	36.18
FS	30.78	30.89	31.18	32.13	32.31	32.29
CHS	36.32	36.76	35.98	34.37	34.61	34.74
CHI	31.54	30.9	30.87	28.69	28.76	28.54
F3H	35.33	35.56	35.19	33.21	33.18	33.76
F4R	32.12	32.78	32.56	30.32	30.26	30.85
dCt
Actin	-0.253333	0.0166667	0.236667	-0.05	0.04	0.01
DXS	4.67667	5.23667	5.65667	1.54	2.14	2.73
DXR	4.02667	3.86667	4.52667	2.48	2.31	2.24
TS	7.41667	7.46667	6.68667	5.75	5.82	5.91
SS	4.32667	5.09667	4.87667	3.55	3.45	3.55
PFP	6.58667	6.87667	6.33667	2.38	2.2	1.99
MPI	9.78667	9.90667	9.55667	5.32	5.76	5.28
XI	5.35667	5.60667	5.52667	7.68	7.37	8.18
FS	2.78667	2.89667	3.18667	4.13	4.31	4.29
CHS	8.32667	8.76667	7.98667	6.37	6.61	6.74
CHI	3.54667	2.90667	2.87667	0.69	0.76	0.54
F3H	7.33667	7.56667	7.19667	5.21	5.18	5.76
F4R	4.12667	4.78667	4.56667	2.32	2.26	2.85
ddCt (to first sample)
Actin	-0.253333	0.0166667	0.236667	-0.05	0.04	0.01
DXS	-0.513333	0.0466667	0.466667	-3.65	-3.05	-2.46
DXR	-0.113333	-0.273333	0.386667	-1.66	-1.83	-1.9
TS	0.226667	0.276667	-0.503333	-1.44	-1.37	-1.28
SS	-0.44	0.33	0.11	-1.21667	-1.31667	-1.21667
PFP	-0.0133333	0.276667	-0.263333	-4.22	-4.4	-4.61
MPI	0.0366667	0.156667	-0.193333	-4.43	-3.99	-4.47
XI	-0.14	0.11	0.03	2.18333	1.87333	2.68333
FS	-0.17	-0.06	0.23	1.17333	1.35333	1.33333
CHS	-0.0333333	0.406667	-0.373333	-1.99	-1.75	-1.62
CHI	0.436667	-0.203333	-0.233333	-2.42	-2.35	-2.57
F3H	-0.03	0.2	-0.17	-2.15667	-2.18667	-1.60667
F4R	-0.366667	0.293333	0.0733333	-2.17333	-2.23333	-1.64333
2-ddCt
Actin	1.19196	0.988514	0.848704	1.03526	0.972655	0.993092
DXS	1.42734	0.968171	0.723635	12.5533	8.28212	5.50217
DXR	1.08172	1.2086	0.764895	3.16017	3.55537	3.73213
TS	0.854607	0.825496	1.41748	2.71321	2.58471	2.42839
SS	1.3566	0.795536	0.926588	2.32409	2.4909	2.32409
PFP	1.00928	0.825496	1.20025	18.6357	21.1121	24.4201
MPI	0.974905	0.897095	1.1434	21.5557	15.8895	22.1618
XI	1.10191	0.926588	0.97942	0.220166	0.272942	0.155681
FS	1.12506	1.04247	0.852635	0.443396	0.391387	0.39685
CHS	1.02337	0.754364	1.29534	3.97237	3.36359	3.07375
CHI	0.73884	1.15136	1.17555	5.35171	5.09824	5.93809
F3H	1.02101	0.870551	1.12506	4.45883	4.55252	3.04547
F4R	1.28937	0.816014	0.950439	4.51064	4.70219	3.12387
