# Supplementary material for: Comparative metabolomic analyses of Dendrobium officinale Kimura et Migo responding to UV-B radiation reveal variations in the metabolisms associated with its bioactive ingredients
Source: PeerJ. 2020 Jun 29;8:e9107. doi: 10.7717/peerj.9107 (PMC7331624; doi:10.7717/peerj.9107)
Supplement: Table S2 [file peerj-08-9107-s005.xlsx]

## Sheet: Sheet1
Table S2 The detail information of the untargeted metabolomes of D. officinale under the control and UV-B treatment.
X	name	mzmed	mzmin	mzmax	rtmed	rtmin	rtmax	npeaks	data	maxint	Control_78	Control_9	Control_17	Control_24	Control_32	Control_40	Control_47	Control_55	Control_63	Control_70	UV-B_81	UV-B_12	UV-B_20	UV-B_28	UV-B_35	UV-B_43	UV-B_51	UV-B_58	UV-B_66	UV-B_74	QC8_P	QC9_P	XF10_P	XF1_P	XF2_P	XF3_P	XF4_P	XF5_P	XF6_P	XF7_P	XF8_P	XF9_P	isotopes	adduct	pcgroup	num.ms1.spec	num.spec	isolation.warning	rt.extended
1	M67T22	66.9745	66.974	66.9748	21.799	17.259	25.255	69	67	1778	15141.9	11802.3	9218.56	8957.84	9102.16	15141.6	15602.2	13874.9	15139.4	15402.8	15145.4	8990.9	9893.21	19355.4	13785.6	24679.2	14343.8	14788.7	11633	9795.05	15136.3	10405.2	13982.3	10782.5	8764.24	11125.5	17457.4	14380.1	25507.1	17915.4	16344.4	20480.9			115	0	0	FALSE	FALSE
2	M67T5	66.9744	66.9739	66.9748	4.8395	1.852	10.309	50	50	1747	14316.1	11484	8815.01	8255.24	12063.8	14119.5	4735.03	16022.6	14839.7	14867.9	15242.4	12814.9	13884.1	16727.1	13872.5	12165.2	17270.4	8724.01	8934.87	10289.5	13819.6	17812.7	13608.7	10333.9	8891.71	5350.47	12541.2	15346	13599.5	14744.1	14720.5	15195.7			135	0	0	FALSE	FALSE
3	M69T22	68.9715	68.9711	68.9718	22.132	13.649	27.235	43	42	1025	4277.49	3479.46	2679.17	2740.41	3425.34	4062.63	4260.7	4739.13	4568.51	4522.77	3338.43	2776.97	4237.01	5508.99	5288.16	4865.84	6541.55	4772.15	2598.87	3445.83	4034.43	4171.43	4301.27	2524.3	2751.51	3753.74	3704.03	3877.64	5097.56	4264.02	4687.22	4702.99			115	0	0	FALSE	FALSE
4	M69T372	69.0336	69.0323	69.0346	371.793	368.414	380.384	52	51	1351	6924.93	4870.15	4698.92	4906.97	4328.61	4852	4735.1	5769.34	4258.43	5709.5	2455.31	2891.82	2222.67	3176.64	2224.05	2700.04	2864.01	1550.29	3625.3	3018.78	1847.27	3370.78	5157.84	5352.33	5569.5	5173.69	5902.82	4553.04	5191.56	5153.96	4159.18	4840.54			131	0	0	FALSE	FALSE
5	M70T313	70.0653	70.0644	70.066	312.827	309.465	325.094	82	81	10972	1922.4	3493.94	1809.61	3235.12	1535.69	4172.26	1622.4	3357.91	3222.25	2775.72	13352.8	13635.2	14178.4	13278.1	12306.3	12741.3	13814.7	12595.5	10114.9	12505.7	13386.6	11843.2	54490.5	52528.6	46990.3	59269.4	51925.5	59619	59305.2	62093	54614.2	57295.9			66	11	7	FALSE	FALSE
6	M70T269	70.0652	70.0645	70.066	268.886	263.201	270.351	45	45	5058	2220.18	2591.73	472.895	2044.51	1339.36	2288.92	2700.71	2214.84	1235.1	3563.91	4252.69	4900.57	3972.98	4262.4	4264.43	3937.01	4950.48	3550.67	3017.95	3460.58	3089.3	3944.72	5061.38	3844.24	3752.88	4075.56	4000.3	4664.19	4651.87	4382.23	4672.14	4367.29			76	8	64	TRUE	FALSE
7	M72T306	72.0808	72.0793	72.0817	305.913	300.745	321.114	64	56	5639	5662.76	1626.49	1726.18	1462.96	1891.19	3376.35	3114.78	2478.37	1583.97	816.43	4952.38	4256.86	5684.99	4592.62	5158.82	5070.37	3768.77	3621.88	2287.42	5289.77	7942.72	2809.95	23743.8	19606.6	25846.4	21234	26895.6	20162.3	29024.2	20158.6	26055.4	19098.8			6	1	13	FALSE	FALSE
8	M74T21	74.06	74.0595	74.0604	20.8445	17.366	25.922	74	74	2979	26365	30427.6	26423.6	33901	16324.3	41944.8	33878.4	29209.8	27851.3	14416.9	31559.5	30829	26631.8	25642.5	24547.3	31765.5	27117.5	25965.9	36682.3	31383.7	28456.1	28969.7	13405.3	31666.5	38375.4	31778.3	40361	26621.4	37007.8	38091	26002.5	34431.4			115	1	6	FALSE	TRUE
9	M74T5	74.06	74.0594	74.0604	5.0895	2.565	10.404	54	54	2817	22848.7	10923.7	28393.4	28021.7	26142.4	30310.5	27675.2	24085	23112.6	22163.3	24608.6	10883.4	18734.1	25473.9	18645.9	20748.3	17890.3	24150	28559.8	26492.3	29179.4	27304.1	21296.6	30288.5	30781.1	29396	11984	18526.6	26507.3	24759.4	22321.2	24394.9			135	2	8	TRUE	FALSE
10	M74T645	74.06	74.0595	74.0605	645.376	640.709	665.464	67	57	2458	35017.8	36747.7	88720.7	87410	22340.6	82870.2	27231.9	9363.02	36757.8	38065.5	37878	39673.5	31736	63885.5	17696.3	80771.7	38156.9	8980.64	23925.2	22653.9	38526	21764.1	30422.2	89997.4	66173.3	23467.7	42862	15496.6	24892.7	38652.9	35536.3	8037.98			143	8	18	FALSE	TRUE
11	M74T704	74.06	74.0593	74.0603	703.898	694.069	719.352	60	51	2592	23575.9	11421.4	10193.8	55983.5	57411.4	29217.3	32250	1159.95	24775.8	24622.6	24525.1	27132.5	22691.5	25604.1	1035.18	27832.6	26674.5	28477.7	27649.4	35471.9	61740.6	1293.27	21569.2	15364.4	31890	34430.8	45432.5	44558.9	32876.1	28469.5	24410.3	8921.46			146	8	18	FALSE	FALSE
12	M77T38	77.0384	77.0369	77.0395	38.272	28.3	55.283	57	53	3417	1978.64	1918.17	2604.91	2527.67	2045	1801.76	2604.77	1449.44	3750.89	1744.25	7034.91	13003.6	5513.11	9875.6	4385.45	6549.67	8391.85	6428.69	11609.2	11158.5	8840.69	12299.2	2635.05	3776.9	2643.31	4317.6	4667.37	1812.58	1483.31	4732.65	4044.9	3230.11			2	0	0	FALSE	FALSE
13	M79T38	79.0541	79.053	79.055	37.636	26.915	62.662	77	69	7860	2216.72	2925.76	1644.31	2925.02	3038.88	2613.12	2322.43	2252.65	2757.14	2173.63	17415.9	15622.3	23640.7	17626.1	10742	19116	18954	11050.9	21823.9	13015.1	26782.4	21854	3148.66	6156.06	3124.94	3995.34	4649.63	5664.59	3970.51	6215.33	4224.94	3152.83			1	0	0	FALSE	FALSE
14	M80T426	80.0496	80.0483	80.0505	426.26	421.752	433.471	64	62	1709	2994.01	4884.15	4839.55	3408.04	3963.84	5204.97	5402.28	4310.67	3618.49	4558.78	3557.77	3373.76	1335.6	2476.74	1481.64	1510.71	2316.53	1109.52	4232.09	1877.03	2926.48	3227.78	3622.95	3367.15	4753.96	4951.92	4468.86	3965.71	1936	4467.19	4318.92	2880.46			17	0	0	FALSE	FALSE
15	M81T247	81.0334	81.0327	81.0345	246.882	240.448	260.862	84	82	13607	6935.06	4409.28	4497	4273.5	6511.81	2678.04	4824.89	4695.56	7372.3	4358.58	50388	49702.8	55926.3	43576.4	47578	53827	53083.3	41254.5	47452	45774.5	48748.6	49112.6	54743.4	35873.6	49659.7	43656.4	54774.7	38095	54399.6	46097.3	57103.1	42997.8		[M+H]+ 80.0256	15	4	9	FALSE	FALSE
16	M81T376	81.0334	81.0321	81.0347	376.062	367.911	379.637	63	63	1250	1054.98	1229.4	1091.32	1214.84	1139.98	1162.44	1018.49	1050.14	958.36	1210.23	1555.66	1903.11	2037.91	2614.13	4292.63	2953.33	2949.05	2000.36	2828.22	2162.46	3075.54	1817.34	4671.32	2597.02	2909.71	4564.34	2726.56	3092.34	2884.06	2945.36	6194.47	2455.37			34	0	0	FALSE	FALSE
17	M83T322	83.049	83.048	83.0502	321.512	320.074	327.329	64	64	1564	1917.19	2001.81	2053.6	1904.45	1504.48	1292.99	1595.71	1419.72	2689.26	1111.27	2214.99	1708.74	2218.2	2412.39	2201.46	1401.74	1935.65	2629.58	2358.46	2429.99	4313.7	2800.51	2589.34	3623.02	1377.54	3211.08	1200.99	4432.61	2762.15	4740.14	2724.69	5364.42		[M+H-H20]+ 100.057	5	0	0	FALSE	FALSE
18	M84T399	84.0442	84.0427	84.0449	398.758	389.72	414.875	68	63	6718	1446.92	1295.99	1011.08	1421.54	1043.05	1679.84	1220.49	1384.78	1350.74	1538.66	12083.8	11053.9	11098.7	30486	12727.1	15071.2	12679.3	12567	11664.4	12620.5	12545.9	3125.69	2015.4	369.9	2132.31	1861.86	2272.56	2033.15	2111.49	1946.14	2196.38	1948		[M+H-H20]+ 101.05	67	7	5	FALSE	FALSE
19	M84T375	84.0443	84.0437	84.0455	375.242	371.458	383.623	49	47	10495	1036.37	1646.1	1452.23	2341.24	1502.49	1832.58	1741.63	2208.62	1607.74	1822.93	12842.3	12776.8	8160.24	9085.41	11778.2	8866.13	13991.3	7286.17	9962.27	8691.1	9111.66	10053.4	4160.28	4676.71	2331.12	4508.5	4348.9	4386.73	2661.77	2993.32	3789.16	3121.69			34	7	8	TRUE	FALSE
20	M85T255	85.0283	85.0254	85.0291	255.07	244.81	260.845	83	82	3606	35380.1	41246.5	31468	40856.2	37310.8	46631.4	45143.9	43699.4	35335.3	49953.6	22411.3	21343.3	23343.6	29049	22784.4	29489.3	28532.5	22630	23215.2	21139.8	24346.9	21108.5	21977.1	28493.4	15199.5	37667.3	24090.1	25508.1	23085.1	28561.8	23593.2	27255.8		[M+H]+ 84.0206	70	0	0	FALSE	FALSE
21	M85T413	85.0284	85.0273	85.0294	413.475	407.756	419.071	47	47	1294	1362.67	1315.52	1647.19	1346.92	1302.9	1439.2	1499.82	1655.13	2347.43	1203.48	3036.02	2816.52	2696.41	3023.41	2362.14	2532.56	1874.53	2440.69	5809.73	2611.87	2959.55	2423.87	1874.72	1812.73	2028.42	1748.61	2146.06	1793.79	1924.02	1778.55	1831.87	1684.85		[M+H]+ 84.0205	41	0	0	FALSE	FALSE
22	M85T137	85.0645	85.0632	85.0652	137.091	125.552	156.305	44	43	1367	2244.01	2649.64	2090.74	1881.29	2178.26	2086.16	1867.93	1024.6	2167.97	1944.12	2590.81	876.184	4040.13	729.54	3812.59	2206.03	4314.55	3930.37	4001.16	6288.91	4151.13	4241.02	412.385	2529.59	1674.18	2430	2097.44	2438.87	2335.53	2377.69	2223.22	2030.58			60	0	0	FALSE	FALSE
23	M86T372	86.0599	86.0581	86.0606	371.594	362.51	390.199	79	78	6803	28894	26489.1	29089.3	27545.4	26296.8	29880.8	25812.1	28572.9	26748.3	22971.3	11912.8	11173	12902.7	12841.1	12051.5	11922.5	11319.7	11646.6	11938.7	11213.1	11803.2	12245.7	24397.7	27096.4	25714	27521.2	24357.6	28158.3	27116.4	26846.7	23312.5	26148.6			33	7	13	FALSE	FALSE
24	M86T269	86.0963	86.095	86.097	269.169	263.407	291.516	115	74	24053	10422.1	8968.88	9472.28	9901.33	9483.73	9956.43	10291.1	12123.5	10741.2	9257.01	14178.6	13763.9	14174.7	13550.4	13781.9	16003	16357.6	16338.5	12779.4	14545.9	13556.4	14678.9	92579.6	71092.9	88633.7	72191.2	93502	82055.7	95703.7	77785.5	90971.2	85865.6			76	12	9	TRUE	FALSE
25	M87T372	87.0439	87.0431	87.0453	371.538	365.971	384.105	82	81	10323	42541.3	45033	41434.6	44523.9	42712.9	47928.4	45717.8	46963.7	48392.7	47869.7	17561	15517.9	16867	19269.1	18380.8	19019.5	19462.5	17535.9	18654.2	17564.3	17110.1	16615.1	35398.1	44205.7	43098.9	41038.3	42272.4	46289.4	42051.7	45324.2	38638.7	39491.5			33	18	10	TRUE	FALSE
26	M88T409	88.039	88.0376	88.0405	408.787	404.8	420.094	43	41	895	658.408	819.584	647.829	870.919	575.678	699.136	797.465	912.896	620.429	732.205	1808.95	1030.58	2681.06	1420.73	419.195	1221.19	768.132	2130.35	1066.81	1528.91	1608.48	1483.95	2098.33	1820.28	2000.97	1897.75	2328.84	1628.06	2445.08	2083.88	367.2	2158.36			81	0	0	FALSE	FALSE
27	M89T21	89.0708	89.0703	89.0713	21.197	17.678	25.63	47	47	779	3718.93	4978.38	5269.38	5022.17	4688.36	4644.82	4657.3	4396.87	4300.13	3966.22	3898.66	3731.95	3586.3	5456.08	5067.76	4720.3	4687.19	4337.91	4028.17	5300.23	5184.12	4587.87	3936.95	6713.42	5110.56	5024.74	4895.68	4596.08	4419.06	4844.45	3975.83	3765.41			115	0	0	FALSE	FALSE
28	M89T2	89.0707	89.0702	89.0714	2.419	0.853	10.979	50	45	1387	1905.11	2533.65	2579.21	2302.4	2547.61	2287.52	2403.52	2078.22	2117.25	2070.3	226.8	1915.94	2981.91	2281.56	2340.72	2468.36	2089.55	2237.92	2815.09	1384.35	2283.55	1314.99	1898.93	3208.35	2364.61	2045.13	2282.62	2029.5	1685.76	1698.27	1969.79	1881.2			189	0	0	FALSE	FALSE
29	M90T32	90.0547	90.0534	90.0558	31.6805	26.583	40.337	58	57	3417	180.186	98.4848	38.4901	220.875	255.061	373.83	352.018	354.852	269.189	145.019	10221.8	9769.59	11070.9	6814.71	6623	9644.71	8402.38	6736.14	10562.3	9423.35	5528.58	10757.6	212.747	1014	207.972	630.72	229.74	777.297	374.119	915.452	236.397	1256.22			3	0	0	FALSE	FALSE
30	M90T348	90.0548	90.0538	90.0554	347.579	345.675	352.658	46	46	1037	1259.8	1289.43	787.93	1247.25	496.48	1111.27	1733.36	1173.49	1073.95	1464.81	1045.85	1242.39	1311.52	674.71	1277.37	1341.63	1424.77	1367.77	1429.15	1060.17	1220.05	881.28	3267.29	3998.11	5633.84	4006.88	5479.04	4621.43	6162.64	4141.51	4190.13	4142.37			54	0	0	FALSE	FALSE
31	M91T37	91.054	91.0532	91.0555	37.3555	28.215	45.165	82	79	7177	6357.51	5241.67	6699.02	5510.5	6808.15	6560.46	5109.93	7678.83	4244.69	6647.77	36853.8	32164.3	30410.2	34553.7	31896	34535.6	28338.1	20193.7	21526.6	27184.7	47575.6	30933.5	18365.7	9799.91	19816.3	26101.8	13436	13407.7	10305.7	18782.2	27312	11842.3			1	0	0	FALSE	FALSE
32	M95T334	94.9292	94.9286	94.93	333.845	330.152	350.02	83	82	743	4114.73	3754.14	4523.51	4311.96	3621.57	4629.85	3517	4488.4	4314.55	3607.39	6870.28	6997.87	6623.33	6832.38	6030.12	3515.35	6790.57	5823.15	5835.45	5880.43	7336.86	7408.28	9051.42	6594.81	7696.25	7862.1	7153.42	7040.85	7490.55	7350.13	8142.33	7443.24			171	0	0	FALSE	FALSE
33	M95T134	95.0853	95.0847	95.0859	134.294	126.187	147.884	78	72	7990	24294.3	16317.6	22523.8	18904.6	18794.6	18973.9	20257.9	22821.4	23080.5	22515	75927.5	63203.1	82354.9	58114.1	74418.1	62206.5	72285	80527.9	65956.2	65834.4	51059.6	37201.7	11602.8	13559.6	11343.8	14342.3	12411.5	14956.2	12322.8	16095.5	11701.1	14872.2		[M+K]+ 56.1241	13	1	22	FALSE	FALSE
34	M96T134	96.0885	96.0863	96.09	134.327	125.479	145.187	48	46	1842	733.179	1247.56	692.928	757.96	767.92	1440.33	1355.53	1308.45	1235.68	1120.04	2263.71	4122.91	2565.26	3745.07	3721.47	5113.02	5733.62	4108.48	3663.25	2868.28	1569.97	3565.73	581.28	772.839	544.651	628.626	670.223	802.731	536.443	700.282	566.625	704.865			13	0	0	FALSE	FALSE
35	M97T332	96.9254	96.9242	96.9266	332.298	327.72	338.897	71	71	454	1512.23	1103.19	579.376	946.132	961.748	1552.83	1143.51	1235.3	1757.7	1327.47	2628.49	2970.29	3154.04	2653.46	2216.37	2613.08	2478.06	2263.74	1475.04	1584.12	2284.06	2277.36	3205.37	1571.84	1655.1	1869.56	2295.84	2350.82	2986.27	3104.39	3865.31	3252.93		[M+Na]+ 73.934	89	0	0	FALSE	FALSE
36	M97T255	97.0283	97.0263	97.03	255.403	241.788	259.447	81	80	2301	18372.5	24929.9	22540.1	21467.4	19645.2	20863.9	17780.8	25162.4	26520.6	25473.8	13939.3	10092.4	11236.2	14123	12788.4	13783.9	13138.6	12024.9	11617.3	9399.25	15497.2	11951.1	14922.2	15428.6	9320.67	14850.8	14027.1	18207.5	13409.2	15738.1	12299.6	14169.3			152	0	0	FALSE	FALSE
37	M97T427	97.0281	97.0266	97.0297	426.593	409.038	430.469	73	71	1263	3037.36	3572.83	2921.14	2931.39	4236.36	3472.55	3694.24	3599.56	3919.36	4040.96	1571.81	1735.05	2033.04	1272.59	2395.43	2842.02	2293.64	1365.31	1886.63	1558.11	1847.94	1872.07	2137.91	1790.08	2293.37	1406.98	2081.97	1936.16	2353.21	2321.59	1774.72	2380.66			162	0	0	FALSE	FALSE
38	M99T156	98.975	98.9745	98.9756	155.881	148.255	162.343	77	77	9552	99788.8	106123	132500	107124	140042	80387.1	203900	72272.2	108569	69746.1	57679.9	83072.9	58543.3	59037	62569.3	62184.3	32705.9	39473.5	118053	60518.1	60832	63137.1	39504.1	77564.3	66565.3	19728.9	158624	47672.7	33732.5	33708.2	24786.5	129884			46	2	4	FALSE	TRUE
39	M99T233	98.9751	98.9744	98.9756	232.845	221.947	251.012	69	64	6979	36309.7	35818.8	41885.2	36149.1	17946	40475.4	47153.7	35043.5	39613.8	35819.8	49577.5	57385.8	54997.2	36192.2	32344.4	37840.8	26852.7	31825.1	72695.7	40492.6	54090.3	57897.9	133622	34436.3	54074.2	34956.8	165546	213634	143199	140008	123935	146792		[M+K]+ 60.0097	62	2	7	FALSE	TRUE
40	M99T287	98.975	98.9746	98.9756	286.509	281.164	292.695	59	59	6472	61743.1	49091.9	64355	60241.1	43293.3	70988.5	30995.5	61346.5	64602.6	59762	3807.31	61713.2	62019.9	43359.9	44895.7	21130.9	66830	33031.7	78047.7	69828.9	65288.1	65137.6	30301.9	79529.7	45362	128467	51889.4	45147.8	47753.6	47295.4	46545.7	40243.5		[M+Na]+ 75.9855 [M+H]+ 97.9674	136	2	7	FALSE	TRUE
41	M99T208	98.975	98.9746	98.9754	207.677	200.537	217.813	54	53	7803	40397.7	39176.1	35819.9	36161.5	9299.48	42145.8	39366.3	47795.1	40584.4	43777.4	66037.1	49238.4	42408.7	29896.7	30541.7	33488.6	22529.2	38487.1	73522.4	47989.1	56017.1	52764.1	56724.3	50420	51102.6	60522.6	64781.3	58581.5	51665	52411.1	46045.3	50344.1		[M+Na]+ 75.9854 [M+H]+ 97.9674	72	0	0	FALSE	FALSE
42	M99T183	98.9751	98.9744	98.9757	182.923	172.149	194.294	65	54	7677	46701.4	35488.5	63998.8	99194.5	59170.9	44651.7	122837	87064.3	43101.5	31843.8	42998.5	43702.4	20226.9	34073.9	32451	36475.5	32113.1	31798	45319.8	59387.8	41791.1	63863.5	74675.7	57334.1	46495.3	47888.9	53363.2	43687.5	30745.3	48601.4	28385.6	45710.7			29	1	4	FALSE	TRUE
43	M99T317	98.975	98.9746	98.9755	316.562	308.435	326.724	42	42	4909	39287.3	31239.3	31833.7	35643.8	41435.6	26760.9	41954.7	35156.6	42238.1	33700.5	41947.5	50979.6	41891.4	32040.5	33809.1	36225	28563.1	30293.4	32369.6	17697.3	44845.3	36538.7	32642.2	24996.4	37383.5	30411.3	43678.7	42381.3	30602.1	35979.9	17061.9	31920.5		[M+Na]+ 75.9855 [M+H]+ 97.9675	84	0	0	FALSE	FALSE
44	M99T247	99.0437	99.0423	99.0455	247.395	238.838	260.845	76	72	3502	42873.3	37631.9	43578.3	37303	43090	10083.3	53002.3	37620.3	49189	47503.9	7055.01	12375.6	9164.79	8730.75	15264.6	15046	16333.1	9274.97	12040.7	27129.6	8815.4	15134.3	13418	7915	11672.5	10838.7	12911.4	11816.9	12307	12902.3	9874.86	11260.7			15	0	0	FALSE	FALSE
45	M100T648	100.075	100.075	100.076	647.742	637.345	666.447	100	79	15205	7216.74	190125	3842.03	234634	68319.9	54671	70722.4	94387.5	55973.8	368502	379583	68655.3	123069	262352	196152	267819	264659	268789	186396	173755	219359	74268.9	432543	265465	73884.4	231037	137020	200344	221408	47892.6	387466	387393			143	27	50	FALSE	TRUE
46	M100T21	100.075	100.075	100.076	21.4105	14.547	24.837	82	81	17047	318212	100311	59931.2	112205	77886	181167	103451	67484.1	235367	359943	122056	113258	204768	76349.3	63780.2	93805.6	115916	121423	58764.4	105252	91352.8	76751.6	484998	126425	89549	84037.7	92875.5	66466.4	101090	167482	206061	177079			115	7	115	FALSE	FALSE
47	M100T705	100.075	100.075	100.076	704.632	685.084	719.288	109	78	13704	97813.7	42932	128182	3785.88	35619	150629	72050.8	201372	23328.2	67085.9	206248	158698	153607	7532.63	86322.4	85447.7	136965	5040.91	4224.1	77084.1	180631	92173.6	11494.6	206803	180332	167903	83909.8	153301	92511.9	196335	6468.88	163627			146	14	171	FALSE	FALSE
48	M100T5	100.075	100.075	100.076	5.039	2.906	10.096	68	66	17300	128007	31832.1	87030.3	84840.9	83820.9	72898.5	48489.5	92042.3	127736	133392	121367	124017	155147	84085.7	83826.3	89110.5	79542.6	93702.9	88209.3	70188.6	77744.2	63650.2	180586	88869.1	95988.8	78741.1	79818.5	81097.2	78013.4	109252	162279	131473			135	4	68	FALSE	FALSE
49	M101T322	101.059	101.058	101.06	321.575	319.733	322.89	47	47	1347	500.974	546.659	641.638	603.261	504.199	421.32	324.109	752.872	928.93	659.264	1100.19	1213.35	1551.54	1253.41	1427.34	1432.54	1391.03	1182.46	1450.5	1001.6	988.352	1683.28	1526.76	2455.1	1131.82	1683	1503.83	2123.05	1902.62	2968.96	1365.99	1475.29		[M+H]+ 100.057	5	0	0	FALSE	FALSE
50	M101T350	101.059	101.058	101.071	349.995	343.131	353.637	67	66	1226	976.587	857.679	680.523	717.488	546.021	545.219	649.551	835.724	782.711	785.769	1526.39	1696.74	1435.69	1215.48	1632.06	1649.02	1649.38	1113.43	1522.06	1058.85	1697.89	1648.98	2419.84	3909.75	1969.36	3189.75	3360.95	3675.03	2766.31	3442.7	2619.67	3029.87			79	0	0	FALSE	FALSE
51	M102T399	102.055	102.054	102.055	398.824	391.372	404.793	63	63	2111	779.092	945.447	963.737	1013	675.875	850.75	852.999	893.837	1161.06	822.785	4508.05	4285.99	3904.14	5999.17	4861.84	5170.33	5695.67	4618.09	4290.31	4462.73	4564.66	4036.07	1259.37	1008.72	1276.33	1021.92	1021.56	1191.63	1244.53	1241.16	1292.02	1145.26		[M+H]+ 101.05	67	0	0	FALSE	FALSE
52	M102T219	102.127	102.127	102.128	218.976	205.674	225.247	82	82	3500	13446.1	9040.67	12618.5	11905.5	12272.5	11809.2	12247.5	14059	15126.9	13006.4	14406.1	14183.7	13937.8	15255	15254.5	13994.8	14971.8	13502	12517.7	13184	13104.3	13595.7	12048.8	11963.6	14473.2	13865.2	14244.4	14149.9	15473.4	14766.9	14067.9	12324.6			20	12	8	TRUE	FALSE
53	M104T372	104.07	104.069	104.072	371.599	365.148	383.216	82	81	11855	45363.7	49774.5	45366.9	46083	47410.2	52099.4	50150.4	52634.5	47051.3	48705.3	21237.1	18389.5	19738	20815.8	20583.8	23723.5	18876.7	17676.1	18918.5	19371.9	18788.6	19249.1	44935.5	46709.7	48923.1	47108.6	45966.2	51419.4	50538.1	47176.4	43931.6	45503.3			131	30	647	TRUE	FALSE
54	M104T276	104.107	104.106	104.107	276.016	274.44	278.085	82	82	232671	2.06197e+06	1.71755e+06	1.86065e+06	1.76488e+06	2.03091e+06	2.04004e+06	1.92192e+06	1.87219e+06	2.08122e+06	2.11939e+06	1.87336e+06	2.18379e+06	1.8785e+06	1.63747e+06	3.22421e+06	1.68343e+06	1.78857e+06	1.60506e+06	1.84687e+06	1.86378e+06	2.07386e+06	2.23679e+06	4.67192e+06	1.75158e+06	2.11105e+06	2.07258e+06	2.21896e+06	2.07566e+06	2.27105e+06	2.37054e+06	2.51416e+06	2.43985e+06	[1][M]+		27	61	1412	TRUE	FALSE
55	M104T148	104.107	104.105	104.107	148.06	144.612	158.438	66	65	2581	7588.99	6180.43	6117.54	6184.36	9740.8	6571.18	5695.58	7286.79	9343.24	7246.7	8256.3	11379.4	10909.1	6998.63	11020.3	10373.7	10866.7	12777.9	9065.28	14095.6	9999.77	1241.51	6471.34	8245.91	9236.11	8633.35	10428.1	12006.5	9803.2	12117.1	8219.68	9973.2			24	2	11	FALSE	TRUE
56	M104T340	104.107	104.106	104.107	340.099	335.913	351.508	79	71	36415	190181	134466	157607	106125	88419	152317	241303	80756.4	122411	146722	170465	76681.1	65672.9	84426.4	130864	75216	119970	74844.6	70946.6	118145	117911	73291.4	141289	118640	133365	116415	136897	136675	137374	130382	152036	150322			25	59	1363	TRUE	TRUE
57	M104T296	104.107	104.106	104.107	296.26	291.806	304.897	56	53	131324	952396	1.229e+06	1.29282e+06	925215	837493	1.04489e+06	1.43749e+06	1.14557e+06	1.32264e+06	1.35538e+06	1.48392e+06	708893	1.05798e+06	1.17903e+06	1.13198e+06	876436	458201	1.18842e+06	1.20708e+06	1.23022e+06	991949	1.37083e+06	1.58819e+06	1.69792e+06	1.73583e+06	1.36734e+06	1.52611e+06	1.40189e+06	1.35273e+06	1.4945e+06	1.54865e+06	555330	[2][M]+		23	82	1363	TRUE	TRUE
58	M104T318	104.107	104.106	104.107	317.779	311.506	326.724	45	44	57565	343323	145971	318909	381821	383111	340309	396500	355609	356111	551638	457876	447992	439439	433147	257601	413717	415728	367634	438740	397349	446872	455191	310169	302435	343563	308321	309636	393985	320456	331432	525430	172883		[M+H-H20]+ 121.114	84	55	1363	TRUE	TRUE
59	M105T359	104.992	104.991	104.992	358.889	353.222	362.668	72	72	4529	863.331	513.738	1067.08	494.621	1008.67	536.194	583.117	490.934	670.633	327.262	6163.05	4631.65	5073.58	6501.91	6743.38	6892.95	7392.28	6929.75	5901.66	5856.42	6065.51	6810.22	6697.69	2320.8	8240.15	2314.38	7801.75	2222.92	8380.99	1773.76	6273.89	2329.51			144	1	2	FALSE	FALSE
60	M105T36	105.069	105.068	105.071	35.599	30.166	56.268	58	56	8806	21531.1	21227	19510.3	23083.3	20676.8	25054.6	21269.6	24021.1	20036.7	24936.6	19439.8	6724.45	4940.73	7736.45	5210.76	4012.39	9095.88	9908.61	11743.5	5437.64	9894.66	4060.5	24015.4	13799.5	22314.2	18263.8	19805.8	22855	21845.5	19797.4	21585.9	17085			1	2	30	FALSE	FALSE
61	M105T276	105.11	105.109	105.111	276.381	274.557	286.754	85	82	8185	68336.8	62620.4	35510	64085.6	89319.3	65641.6	131272	33338.7	60929.6	79033.2	59427	58295.2	131791	58591.1	60718.7	63741.4	64073.2	59044.2	49584.2	71300.9	65568.3	71739.6	79785.6	64680.9	69106.9	70278.2	69467.8	65853.8	76637	74867.7	83076.7	35455.7	[1][M+1]+		27	0	0	FALSE	FALSE
62	M105T296	105.11	105.11	105.111	296.11	290.588	304.92	45	44	5673	48900.5	27887.3	46702.5	47165.2	48465.9	58509.9	52429.4	35992.3	35294	54104.8	39881	40764.3	44619	37297.5	43012.2	39371	38258.3	35653.4	51321.9	21773.9	42390.2	37411.9	4549.05	22187.6	52730.2	43287.3	23229	63368.2	45785.1	58177.4	47031.5	39330.9	[2][M+1]+		23	0	0	FALSE	FALSE
63	M106T380	106.05	106.049	106.051	380.379	372.781	398.324	60	56	1432	3234.58	2554.26	2498.54	2516.79	2804.01	2779.99	2868.19	2805.36	1992.34	2842.11	3042.52	2334.46	2112.89	2776.91	3394.97	3303.49	2808.22	1703.44	2133.05	3566.12	3661.52	3000.83	6747.48	6814.18	8775.33	7698.07	9887.37	9488.16	8601.4	8500.59	11557.1	6643.44			80	0	0	FALSE	FALSE
64	M106T278	106.111	106.109	106.116	277.526	273.873	299.377	49	46	1556	5286.12	1256.74	5419.04	1795.06	1301.1	5386.05	5886.92	3211.7	5340.38	848.75	1129.24	1178.18	5081.71	4747.55	2517.62	1408.04	3359.73	5284.61	4685.99	3100.63	2975.96	5687.27	4125.86	4533.2	1955.53	5339.73	5348.51	3754.51	5418.6	1364.06	1644.16	1413.34	[1][M+2]+		27	0	0	FALSE	FALSE
65	M107T39	107.049	107.048	107.049	39.2975	27.003	65.363	94	77	17745	1726.36	6610.56	1422.22	2530.66	6336.56	6685.55	6785.12	7977.91	2312.85	405.947	63621.1	56811.2	45754.5	51185.6	45584.9	66214.8	48600.7	65242.2	54643.1	56879.9	56098.4	51775.8	10222.5	7127.62	9771.79	15211.2	9421.05	10005.6	16932.3	7053.58	14581.4	14464.1			2	0	0	FALSE	FALSE
66	M109T247	109.028	109.028	109.029	246.651	239.918	257.675	74	74	6151	4922.65	4026.71	3180.25	3216.09	5224.5	730.403	4471.3	5616.91	5077.4	5503.37	24206.5	25609.6	20936.6	25119.2	23627.5	25807.6	27086.3	29131.3	23806	22575.5	25055.2	22779.5	23610.3	23400.4	26395.9	21523.5	27937.2	22854.8	28603.7	23307.8	27551.2	21202.5		[M+Na]+ 86.0385 [M+H]+ 108.02 [M+H-H20]+ 126.034	15	0	0	FALSE	FALSE
67	M110T138	110.06	110.058	110.061	137.756	131.896	143.299	60	58	1774	4998.75	9157.62	4532.78	8402.28	5263.91	10944.3	10099.7	10427.1	5148.46	10100.5	4692.25	4324.43	5346.93	4525.62	6009.41	5357.98	5845.31	4942.99	4660.56	1957.14	3834.33	2938.08	2139.33	2134.95	2375.1	2138.46	2303.21	2191.69	2193.2	2056.28	2252.68	2120.81			60	0	0	FALSE	FALSE
68	M111T258	110.975	110.973	110.976	257.837	246.797	262.49	75	74	1408	9857.52	8767.98	5995.57	10028.1	10838.1	9785.1	11773.6	8444.29	12406.3	8211.54	5215.22	4933.41	4749.92	3655.86	2946.03	3665.44	3208.33	2181.98	4182.78	3060.25	3956.78	4984.21	3501.22	2618.98	2760.71	3022.25	3801.71	3938.51	1912.39	2801.31	2407.17	3819.44		[M+Na]+ 87.9854 [M+H]+ 109.967	35	0	0	FALSE	FALSE
69	M111T345	111.044	111.043	111.045	345.102	339.518	358.822	64	64	921	1270.08	1244.39	1175.23	1394.14	1141.86	1198.84	1270.33	1169.4	1180.17	1586.1	2103.35	2352.82	1502.97	2114.04	2216.19	2005.26	2513.66	1760.75	1745.75	2274.59	1852.86	1733.4	451.972	378.835	445.228	374.623	365.986	303.447	398.019	197.383	562.515	413.635		[M+H-2H2O]+ 146.059	54	0	0	FALSE	FALSE
70	M112T240	112.05	112.049	112.051	240.065	226.368	243.862	80	80	29515	57674.4	31246.8	30452.3	32477.5	33426.7	39863.4	39216	51155.8	51489.2	51596.9	35373.8	34539	31228.3	37350.9	37529.7	35191.7	43485.1	32157	23518.9	26484.4	27136.7	33051.6	152659	110815	115913	114786	136073	135102	162298	145222	171771	141630			88	30	26	FALSE	FALSE
71	M112T207	112.05	112.05	112.051	206.997	195.62	209.996	41	41	32903	72744.6	26637.6	26311.8	23804.1	35749.2	34531.7	36385.6	49251	61631.4	53376.2	28184.2	24274.1	25191.5	24858.6	25565.3	26087.2	30293.1	22358.2	11517.6	14222.1	22962.9	25344.6	167603	69663.6	124266	75088	140394	91589.4	153890	89939.5	177073	91649			107	21	72	FALSE	FALSE
72	M112T269	112.087	112.085	112.088	268.817	263.201	270.427	62	62	5895	1493.83	2440.92	920.056	2086.62	1172.16	2576.41	2944.36	3596.14	2418.99	3697.7	4617.94	5359.69	4374.7	5145.03	4462.06	3211.22	5403.22	4871.38	3595.58	3873.18	3888.47	3986.79	4224.79	4670.7	3780.78	4434.3	4421.19	4537.98	4972.56	5237.38	5098.04	3316.68			76	9	37	FALSE	FALSE
73	M113T332	112.895	112.893	112.896	332.257	326.584	345.458	50	47	493	1163.87	535.527	281.342	421.033	558.582	836.929	1010.86	388.08	1324.38	549.561	1677.71	1818.71	1900.19	1177.24	1461.75	1825.85	1832.31	1223.73	464.699	923.653	1270.81	1620.09	1829.91	622.925	522.654	788.676	1105.33	1459.42	1737.5	1752.74	1986.03	1628.77		[M+K]+ 73.934	89	0	0	FALSE	FALSE
74	M113T163	113.034	113.033	113.035	162.932	160.728	167.983	75	75	5468	26457.7	18935.3	22452.5	21919.2	22263.1	21830.2	22496.5	22740.6	24554.5	22192.2	11358.7	13892.6	11030.5	12864.8	11361.6	12653.6	13017.9	10390.9	7703.44	11365.3	11890.4	11470.3	32803.6	18371.3	39362.1	33001.1	40961.3	26900.8	40998.5	27016.9	36832.9	29897.1		[M+H-H20]+ 130.041	9	0	0	FALSE	FALSE
75	M113T247	113.059	113.051	113.061	246.75	232.609	253.111	69	63	2358	3676.15	3443.42	3088.33	4188.36	3031.28	3216.01	3533.33	4128.74	4121.42	3364.55	4865.34	3337.51	6740.4	7167.89	3439.17	6194.87	6656.1	7228.36	4719.41	6734.87	1636.58	4811.62	3667.5	3672.21	4774.57	3818.44	2135.07	3364.83	4247.09	3672.33	5566.65	3469.47			15	0	0	FALSE	FALSE
76	M113T133	113.059	113.058	113.071	133.385	116.302	153.009	99	79	2906	9658.77	3507.94	8514.71	11038.1	9883.11	9408.16	9786.09	4104.6	9612.76	7614.85	10176.6	20094.8	22140.2	21849.4	22553	22613.7	17110.7	19672.4	11884	15387.7	20601	10085	2283.98	1115.48	4764.23	2181.9	2290.64	2865.12	2449.5	2291.69	4427.5	1597.93			13	0	0	FALSE	FALSE
77	M115T253	115.039	115.037	115.04	252.895	239.147	257.958	48	48	1216	3474.65	5392.03	3665.77	4241.94	3953.04	5584.93	3528.71	5134.27	4141.89	4042.1	3329.6	3537.44	1371.64	3742.38	3276.88	3195.19	2998.55	1859.36	3205.57	2673.84	3840.13	2380	2967.03	4238.95	2693.21	2705.46	2667.76	2694.68	3158.65	663.808	3688.78	2065.77			70	0	0	FALSE	FALSE
78	M116T172	115.957	115.955	115.958	171.881	164.399	177.408	53	52	1367	3931.89	5517.35	5565.19	4883.1	5262.65	6233.6	5683.47	3963.08	5908.07	2159.67	1485.85	1194.97	3578.53	3179.42	2372.62	3069.76	775.851	2830.39	5376.58	3154.04	3440.29	3385.1	2606.13	2041.81	2649.41	2135.92	2308.3	2059.49	1437.37	1841.64	2126.81	864.616		[M+Na]+ 92.9673 [M+H]+ 114.949	10	0	0	FALSE	FALSE
79	M116T407	116.034	116.031	116.034	407.403	404.292	411.143	46	46	875	364.766	465.704	490.481	671.878	591.684	713.588	653.24	856.528	583.317	546.881	1092.77	1338.32	1458.17	1493.56	1509.17	1346.58	1934.46	1637.05	1388.17	1266.03	1370.02	1630.57	1558.17	1575.48	1854.93	1753.63	1664.72	1559.09	2399.56	1513.37	2372.38	281.6			50	0	0	FALSE	FALSE
80	M116T313	116.07	116.07	116.071	312.615	310.255	322.984	82	82	80777	18250.9	17841.4	17517.2	17039.1	18901.7	21167.5	17110.3	19624.4	19290.4	19746.8	91823.4	87052	92917.6	84142.2	84779	86436.6	94888	89294.8	76134.7	82007.9	88687.7	86623.3	410622	400711	372539	439577	397689	463151	443886	495169	455763	453961	[3][M]+		66	49	255	TRUE	FALSE
81	M116T213	116.107	116.105	116.108	212.969	209.13	218.517	49	49	2547	235.275	181.406	181.384	28.5191	61.6778	356.872	152.352	173.064	430.908	377.205	1651.49	1856.8	2254.51	2173.66	1989.06	2287.62	2447.57	1792.14	1688.13	2015.03	2145.91	1815.14	1587.71	1082.87	879.615	1032.77	1069.93	1308.54	1603.45	1309.52	1910.16	1401.34		[M+H]+ 115.1	56	0	0	FALSE	FALSE
82	M117T312	117.074	117.064	117.075	312.478	309.8	328.971	72	71	3205	1274.84	708.487	181.589	1131.44	1984.98	1866.11	392.611	1156.5	1779.75	2186.42	3820.01	2997.58	3347.76	4379.45	3903.52	2569.53	4268.7	4009.14	3053.33	3619.26	4216.28	2290.31	12220.6	13709.4	11334.8	13841.2	14531.5	15677.8	13815.4	16715	14468.2	13161.4	[3][M+1]+		66	0	0	FALSE	FALSE
83	M118T273	118.086	118.085	118.087	273.226	270.696	274.571	79	79	10736	9541.28	7193	8413.52	4601.84	7283.94	5202.31	6281.8	6296.21	9930.49	7449.83	9538.88	8948.6	9513.23	7475.23	8473.68	8212.57	8349.84	8414.55	7254.6	7370.77	8900.01	8561	6050.93	5067.12	6779.85	6579.26	8094.51	8047.93	8314.07	5286.57	8267.29	6998.23			113	35	19	FALSE	FALSE
84	M118T304	118.086	118.085	118.088	304.132	292.249	313.543	42	42	8596	2482.11	2075.47	6361.04	2468.18	2556.06	1245.47	1996.48	2010.67	4377.35	1264.79	7436.84	7481.59	7964.55	7896.11	6932.47	8426.78	9975.97	7316.26	7131.33	6253.61	7645.2	6255.2	36441.9	28534.3	37853.9	30204.4	37231.5	29787.2	40787.2	28477.3	39077.7	27511			6	17	45	FALSE	FALSE
85	M118T277	118.122	118.12	118.124	276.549	260.898	279.099	46	45	6542	5372.05	5274.39	2989.56	3016.72	933.893	2742.54	3054.22	4224.64	782.942	767.227	1010.1	534.402	6521.64	1297.88	1236.45	1994.38	555.134	6904.99	2083.79	1250.63	6307.77	6038.79	1372.68	2410.06	2578.5	1966.65	5373.32	2850.99	1984.14	1844.54	2153.33	1197.18			27	0	0	FALSE	FALSE
86	M119T163	119.035	119.033	119.036	162.917	160.427	173.073	52	50	4029	9244.96	10376.1	7688.4	7382.84	10591.1	11152.2	3799.9	9402.83	9133.17	10379.9	8530.21	10938.4	5861.16	6220.93	9975.93	6017.54	6048.55	8769.87	8345.42	5401	9456.25	3221.03	33798.7	28043.1	39432.4	30146.8	20068.1	24273.8	36298.8	11987.1	15878.6	29157.9		[M+H]+ 118.027	9	0	0	FALSE	FALSE
87	M119T223	119.049	119.048	119.049	222.986	210.329	227.613	77	62	5425	2608.67	2479.36	1649.3	2307.78	2639.32	1757.7	1790.34	3166.47	2105.58	2229.8	8466.04	14965.1	12106	13237.7	7278.74	7251.56	8692.42	7954.67	6647.52	8150.93	14355.5	13341.2	6174.95	8586.01	6168.8	8054.69	6015.16	9250.68	7137.8	8954.76	7051.19	9065.51		[M+K]+ 80.0877	32	2	33	FALSE	TRUE
88	M119T131	119.049	119.048	119.05	131.45	111.372	153.401	90	60	12592	12813.4	11436.2	11104.9	10956	10753.6	12181.5	12000.1	13155.4	12373.6	12746.7	70167.4	33794.9	48362.9	27753.7	51327.9	68697.8	25322.3	69745.1	67597.6	23744.4	17925.5	22326.4	12762.4	14444.2	11891.4	15800.3	11982.8	15611.5	13073.6	16301.8	12428.3	16294.3		[M+H-H20]+ 136.054	13	14	21	TRUE	TRUE
89	M119T34_1	119.049	119.047	119.05	34.1615	27.853	55.645	82	71	5416	24211.4	24468.1	22849	25606.3	24618.9	26886.5	26162.9	27998.5	577.723	26592.3	6699.45	15079	9891.93	10892.1	11511	13963.2	5010.19	13736	17208.1	9937.94	11863.6	6545.07	25794.1	17049.8	24931.2	16658.1	21970.7	19369.1	26897.9	20644.8	23136.6	27877.9		[M+H-2H2O]+ 154.07	4	7	21	TRUE	TRUE
90	M119T134	119.085	119.084	119.086	134.106	108.549	140.477	65	61	5596	12259.3	11373.9	10781.5	11175.4	10937.9	11881	15032.3	12949.3	12028.7	11936.6	61697	42534	39464.8	44674.5	53902.8	44789.7	48331.8	45312.9	60875.5	65285.3	19564.4	55540.5	13195.6	15360.4	12302.3	15674.5	13159.4	16330.4	13385.5	14775.7	13140.7	16326.9		[M+H]+ 118.081	13	5	27	TRUE	FALSE
91	M119T34_2	119.085	119.084	119.086	34.141	29.656	49.867	59	58	6286	18948.6	20951.1	18649.2	21325.9	19590.4	24271.2	23188.4	22547.8	21762.2	23652.9	23527.5	15056.2	13793.7	15291.6	9116.79	17780.7	18101	9674.4	18528	19482.4	8867.67	18483.2	45332.8	68835.6	44258.1	32316.9	47432.9	73445.5	38701	58251.2	38569.1	37651.9		[M+H-H20]+ 136.092	4	9	22	TRUE	FALSE
92	M119T158	119.085	119.083	119.086	157.672	145.71	185.034	73	62	4683	28564.1	41209.5	48627.6	27437.4	43418.5	33190.9	26586.7	34896.1	31265.4	34353.4	26741.9	20950.2	23341.5	22639.2	11738.5	25159.2	37391.3	11523.5	17264.1	25590.1	33785.4	26015.1	10595.6	18266.4	132.066	2837.12	22565	26000.1	12958.8	2030.74	8644.79	15918.3		[M+NH4]+ 101.041	46	4	33	FALSE	FALSE
93	M120T264	120.08	120.079	120.081	264.199	257.737	278.428	76	74	42270	20378	15484.2	16394.9	18590.4	19137.4	20118.3	18963.8	19594	20933	23635.5	23356.7	21377.9	20143.5	22410.8	23442.6	20995.9	24527	20889.1	17360.8	19557.5	21203	19856.5	162718	104183	141695	103010	161789	122250	174541	138465	183594	135866			74	29	48	FALSE	FALSE
94	M120T41	120.08	120.078	120.089	40.87	30.175	66.721	82	71	7895	2620.1	2081.53	3301.21	1834.78	3663.84	1701.83	2523.74	2246.19	4142.97	1526.07	22873.9	20774.3	16034.1	26535.2	25506.8	17618.6	15173.8	19311.2	19970.8	25990.7	25910.3	22980.3	6046.95	2078.59	1057.96	6506.12	7110.55	3474.58	2719.27	6395.08	4048.35	3190.55		[M+H-H20]+ 137.087	2	0	0	FALSE	FALSE
95	M121T41	121.064	121.062	121.065	40.813	29.792	77.727	57	52	3076	9180.37	8023.69	8518.49	8240.78	9066.75	9193.13	9221.88	10500.7	8913.05	9292.32	14275.5	1732.08	2969	12816	4086.47	13470.9	3078.35	3999.37	12914.1	6555.74	13005.5	2589.71	14020.4	19251.5	18626.3	22712.3	16251.2	22216.4	13913.5	14615.7	14215.8	12604.4			2	1	22	TRUE	TRUE
96	M121T40	121.101	121.1	121.102	40.1285	30.335	52.476	44	41	3076	5034.35	12441.6	5366.95	12959.8	7009.44	2633.71	5442.57	4653.89	3146.38	3126.17	6334.14	15891	8853.66	13184.4	3679.19	5456.59	15076.5	13381.3	13200.1	13202.9	13332.7	19125.4	26478.2	29981.7	27889.7	14373.9	18070.1	29963.3	23712.1	27093.7	18168.5	25861.4		[M+H-H20]+ 138.109	2	0	0	FALSE	FALSE
97	M121T163	121.101	121.098	121.101	162.814	145.996	189.435	65	49	3125	12564	12944.4	23383.8	26202.9	12833.1	8954.29	13365.4	5075.12	12877.3	9611.01	14739	18241.9	13704.2	13079.7	11349.9	15048.1	9111.41	1181.44	13279.9	14682.9	13764.4	11130.2	10277.1	10563.6	5656.76	9831.23	7214.92	10134	7885.14	11017.7	8756.34	10378.8			9	0	0	FALSE	FALSE
98	M122T247	122.06	122.059	122.06	246.75	240.448	256.605	75	75	5264	1665.23	1242.2	1443.19	415.959	1447.98	1504.36	1040.05	1360.2	1123.44	1620.14	18272.3	21619	16975.4	24590.6	23816	24141.4	25595.9	19752	16769.1	19835.2	20598.4	26700.7	17755.9	17110.2	20787.2	15518.5	19957	12774.8	18211.5	16655.7	19058.4	16336.7		[M+CH3CN+H]+ 80.0256	15	1	35	TRUE	TRUE
99	M122T147	122.06	122.059	122.071	147.254	135.036	160.708	56	49	11061	3903.79	2426.85	3626.76	2837.13	3859.88	2939.34	3040.56	3347.55	4046.87	409.712	23040.4	20018.1	27960.9	21749.1	32637.2	29806.4	24173.6	19002.3	17588.9	39894.6	22063.2	30738.3	3353.76	3526.53	3097.37	3957.45	3261.27	3847.89	3487.29	3967.36	1312.89	3449.95		[M+Na]+ 99.0645 [M+H]+ 121.046	24	4	35	TRUE	FALSE
100	M122T349	122.071	122.07	122.072	349.396	345.463	371.308	82	80	1356	3175.45	4879.66	2132.99	5243.47	3290.57	5524.45	6027.47	4311.34	2541.58	5349.48	4651.24	4691.42	4555.39	4319.99	4334.64	3286.74	4489.5	3520.66	4188.67	4349.14	4474.27	4629.48	5116.84	5776.32	4127.72	6069.67	4517.11	6685.57	6180.06	6968.12	5053.08	7104.53		[M+H]+ 121.061	79	3	5	FALSE	FALSE
101	M122T288	122.081	122.079	122.082	288.418	284.003	301.376	64	59	3125	838.824	1125.36	552.494	1077.07	1056.28	1102.37	923.571	785.524	972.627	1144.99	8034.5	3746.86	7482.17	5880.44	9914.69	7248.77	8112.04	7385.15	4733.09	7704.62	8673.94	6308.55	1718.32	679.06	847.871	1685.51	1778.89	2561.12	1190.48	1903.98	1933.36	2269.23		[M+K]+ 83.1103	136	0	0	FALSE	FALSE
102	M123T175	123.044	123.042	123.044	174.656	172.888	198.264	74	50	22899	1946.03	1592.52	1643.88	1260.03	1458.98	1355.22	1410.56	1608.05	1579.58	1681.88	25156.3	22009.5	21330.2	23770.5	27926.1	23638.9	21785.4	21592.3	25482.6	18096.2	24150.6	22636.1	2717.09	2532.29	2281.21	2258.62	2493.75	1194.73	2746.4	2609.74	2405.2	3159.4			42	17	69	TRUE	FALSE
103	M123T53	123.055	123.053	123.055	53.454	46.762	68.436	78	70	7547	7612.39	7660.47	7422.32	6803.15	9298.38	7318.62	7526.58	8121.51	7166.81	7560.19	40773.4	25718.7	33075.8	37337.6	33411.1	40064.2	31915.7	42013.8	15205.2	34113.1	39225.8	35449.2	33253.9	17108.3	33425.4	14173.2	30921.6	16991	34825.1	18472.3	34176.8	18503.5			8	2	42	TRUE	FALSE
104	M123T372	123.055	123.053	123.056	372.415	366.057	398.251	104	76	5254	2694.25	2858.41	3021.85	2893.66	3931.74	1863.96	3040.76	3007.95	1407.6	2624.83	13128.6	33033.2	24380.4	12067.1	18619.6	15521.1	17141.5	16345	22006.9	18648.5	20491.7	13269	23594.8	41857.5	31066.9	42553.7	30883.1	44019.6	28197.6	78657.8	25878.2	37806.4			131	17	15	FALSE	FALSE
105	M123T350	123.065	123.063	123.066	349.711	347.786	352.835	46	46	542	1022.1	1257.28	1031.57	1293.4	1258.49	1074.25	1150.33	1070.91	1213.89	1372.23	531.826	1301.24	517.22	571.822	788.857	902.401	1434.33	694.895	530.244	818.071	632.2	1297.27	1570.14	1307.31	1063.21	830.859	568.394	1442.01	1065.66	1060.36	1001.94	1444.12			79	13	10	FALSE	TRUE
106	M123T134	123.08	123.079	123.08	134.37	126.263	147.884	77	70	6626	14785.2	14233.3	12798.6	13702.8	15592	16003.6	14770.8	15512.8	16735	8948.52	42320.9	50973.7	36889.4	47317.1	38633.3	50665.1	62145.6	40779.8	28567.1	52880.6	42007.3	77535	10743.2	11687.1	10173.8	12114.4	11320.8	12018.5	11315.1	11794.2	11070.3	11402.8		[M+3Na-2H]+ 56.1241 [M+Na]+ 100.097 [M+H-H20]+ 140.086	13	0	0	FALSE	FALSE
107	M124T156	124.024	124.023	124.024	156.185	146.588	161.777	76	74	11558	67369.7	189964	148419	134870	141821	142089	68872.8	100373	121717	89100.1	60194.2	44837.3	54311.6	237822	186440	117427	87396.7	76360.2	70215.2	50471.6	47992.9	61582.1	120214	34183.9	79053.3	37424.1	124538	68377.8	111878	96299.5	9151.46	106353		[M+Na]+ 101.041	46	52	23	TRUE	FALSE
108	M124T233	124.024	124.023	124.024	232.845	218.691	241.616	59	56	7018	27601.7	40871.2	44548.5	29985.4	39660.5	34311	32037.6	25622.4	38958.9	26045.7	36417.1	38470.2	48754.4	128886	101911	100851	76537.7	64337.7	48204.8	44305.9	43109.5	49485.7	25850.6	66372.8	70537.5	59582.7	99487.8	54561.3	51409.9	49815.8	51168.2	51163.2		[M+CH3CN+Na]+ 60.0097	62	54	9	FALSE	FALSE
109	M124T284	124.024	124.023	124.025	284.372	269.308	293.311	78	63	8111	24357.3	44606.9	42518.8	55902.9	57392.8	53754.4	51138.7	44226.9	63624.1	49561.1	37098.6	77113.5	52589.7	129673	69629.4	65980.6	78841.9	71402.4	60488.7	53793	29818.4	52271.6	46212	34234.1	28266.3	31070.4	26384.6	40339.2	70150.1	41731.9	26492.2	40415.4			126	58	12	TRUE	TRUE
110	M124T186	124.024	124.023	124.025	185.924	173.796	199.016	65	57	11228	30973.6	121948	78554.9	45440.6	53412.9	38863	32903.5	66517.9	46355	39709.8	46799.8	47191.7	102749	174497	136405	252406	80549.4	73943.9	136248	59614.3	54787	174107	55042.2	61874.2	60206.2	53461.1	70472.9	35735.9	19311.4	50946.2	29912.7	34083.6			153	44	13	TRUE	FALSE
111	M124T389	124.039	124.038	124.04	388.703	378.851	404.449	82	81	9637	27989	20617.7	21305.8	23192.8	25326.6	27210.3	24906.1	25449.6	26097	26241.1	10864.7	10826.1	9923.47	10724.8	10661.9	11833.2	10348.7	9553.5	9878.76	10614.8	11684.7	10071.3	15099.7	32621.7	13971.6	30039	15374.8	27852.4	15745.5	30790.9	15410.7	26051.6	[4][M]+	[M+H]+ 123.031	64	25	27	TRUE	FALSE
112	M124T218	124.039	124.038	124.04	217.984	204.654	225.005	72	72	5491	6132.26	4699.98	5002.46	5426.38	2712.82	4478.1	2976.38	4299.8	5334.11	2901.98	4674.11	4906.84	4619.37	3559.06	2220.68	5072.17	5646.78	4285.77	4613.34	4928.74	5372.81	4543.04	4631.71	32545.7	32797.5	3644.81	5915.52	5109.14	27997.2	5679.2	5847.12	5086.22			20	2	16	TRUE	FALSE
113	M124T668	124.086	124.086	124.087	668.411	651.664	683.647	157	82	4830	17593.8	55028.6	104536	111653	98996.8	104200	33532.9	54987.2	16940	82933.6	90198.2	11611.6	77559.2	97058.3	25283.3	28923.4	18852.3	18251.7	41524.7	30350.8	45789.9	96697.5	87670.9	31608.8	18350.8	114534	26224.4	35659.1	26853	24372.4	37977.7	79521.4			172	23	4	TRUE	TRUE
114	M124T21	124.086	124.086	124.087	20.927	13.11	25.63	78	77	4749	39425.9	59325.1	117535	62315.3	70638.1	64781.9	116936	65659.4	55275.4	53807.6	51347.5	53473	41327	28186.9	49010.3	56178	42620.2	54190.8	45898.2	53868.8	59438.7	54963.8	42175.9	57086.3	64433.1	63044	110398	63115.1	63259.5	49334.9	54759.1	68546.5			115	4	7	FALSE	FALSE
115	M124T703	124.086	124.086	124.087	703.385	692.706	719.299	136	76	3038	21923.3	10248.1	9212.83	19045.1	13421.8	18724.8	44595.1	12190.1	10132.8	13283.5	9859.06	18035.5	17121.9	10779.8	19082.4	9964.63	17248.6	16741.4	14904.9	12478.5	47166.6	22755.7	13861.3	12812.2	17434.1	19846	54777.8	49245	35249.4	38535.6	12297.6	13992.3			146	9	8	TRUE	FALSE
116	M124T7	124.087	124.086	124.087	7.228	2.262	10.624	51	50	4443	30756.1	35495.4	39960.4	35960.5	42548.2	39640.5	41356.4	41582.6	34022	32425.1	34323.7	32680.8	18572.2	23695.8	33740	33710.4	39822.5	30024.9	40324.2	44417.8	38700.7	38820.8	29727.8	35522	11406	39772.9	40143.5	43879.5	39731.2	34321.5	37633.7	32849.4			173	0	0	FALSE	FALSE
117	M124T640	124.087	124.086	124.087	639.643	613.554	650.074	51	42	2360	9905.23	12176.7	11821.8	13972.6	12688.4	8073.37	14022.2	8028.21	10444.8	10984.8	8154.52	10509	6621.07	11164	14325.2	21340.6	7753.59	11729.6	12851.1	29081.4	26382.3	13641.7	10265.5	12080.2	5300.7	9968.48	6530.44	9655.17	13995.4	7149.48	11699	6834.22			185	9	4	TRUE	TRUE
118	M125T389	125.042	125.041	125.043	388.582	379.341	394.103	51	51	625	1931.4	1729.06	1445.63	1505.14	1601.45	1335.92	1836.33	1662.97	1706.1	1764.69	990.955	947.217	653.91	1089.57	630.54	1064.4	2155.49	1967.85	720.63	1875.8	1736.48	532.437	882.476	1824.17	458.2	1494.6	869.445	1401.13	1183	1657.18	1203.21	1612.74	[4][M+1]+		64	0	0	FALSE	FALSE
119	M126T156	126.022	126.02	126.031	155.611	145.029	161.145	41	41	1683	6211.18	15926.7	17307.7	9050.91	15732	10512.5	12772.8	8269.97	9394.91	7594.33	6427.01	5868.54	6484.94	24380.3	17308.4	13491.2	13388.3	19090.8	9745.51	7233.32	7229.34	6505.19	8998.55	11902.4	9231.12	4165.27	7990.04	9046.67	5013.22	4864.99	3239.28	3080.02			46	0	0	FALSE	FALSE
120	M126T20	126.066	126.065	126.066	20.317	11.738	24.409	71	65	969	4956.57	3412.32	6280.95	6508.47	6390.21	6474.81	5925.99	5810.06	5672.09	5158.74	5991.53	4350.07	4692.73	5629.53	7108.05	7455.34	7049.34	6527.96	5813.38	6284.37	7391.69	5135.2	5333.57	4157.36	6153.21	14603.5	6210.22	4775.25	7412.94	5341.63	5324.29	6336.07			115	0	0	FALSE	FALSE
121	M126T2	126.066	126.065	126.066	2.429	0.905	9.528	63	57	1387	2527.85	1714.63	1562.35	2708.27	3172.56	3062.43	2825.67	2674.49	2568.57	2408.53	3447.14	1399.94	4695.29	2762.61	3452.26	3435.76	6573.42	5893.96	1539.38	1791.3	1976.41	1309.42	2632.88	1392.85	5796.89	3237.47	3256.2	2824.46	5504.25	2530.46	2458.53	3831.55			189	0	0	FALSE	FALSE
122	M126T199	126.066	126.064	126.067	199.458	188.088	216.783	50	47	18368	26078	15521.4	14580.1	12764.3	18111.8	18166.4	15069.1	19876.4	29715.7	17670.3	12846.8	11218.5	11754.3	13293.4	12987.2	10874.3	13389.2	11250.4	7802.38	9112.15	9823.98	10077.7	73472.9	36037.5	51686.4	37182.6	66713.1	42884.8	74169.5	46407.1	80619.8	46837.3			30	6	38	TRUE	FALSE
123	M127T247	127.039	127.038	127.039	247.236	239.918	262.325	93	82	8885	38214.5	33121.7	36841.2	34071.9	31722.6	35762.3	33892.9	37478.6	32530	37466.4	41200.5	40093.5	39868.5	40010.8	53125.1	46870	47188.2	63117.7	58083.2	41487.2	66683.4	37882.1	39198.1	50053.7	65523.9	47723.7	48021.4	35430.5	67736	51931.7	45998.7	44689.6		[M+H]+ 126.034	15	10	16	FALSE	FALSE
124	M127T376	127.038	127.036	127.039	375.733	363.396	382.522	48	47	1709	5306.15	4628.97	5680.67	8751.2	6715.86	6076.93	5681.78	7084.59	8789.86	6483.56	2654.34	2136.35	2704.36	1939.95	2718.28	2362.84	2687.97	2902.84	2742.76	3000.2	3006.93	2838.33	3054.85	3367.92	3187.94	3012.15	3569.48	3217.83	4136.58	3019.58	4442.01	2893.89			34	0	0	FALSE	FALSE
125	M127T229	127.097	127.096	127.098	229.06	215.574	242.482	60	59	2508	21070.2	14340	1646.23	15575.8	14926.5	19099.5	19471.7	18301.7	21230.1	18602.2	2022.07	9508.22	5866.77	2179.8	5295.45	7250.35	5837.27	6443.67	15980.5	2480.45	1435.21	3537.29	4503.36	1068.07	3922.78	1395.17	4595.6	1239.32	4176.69	1659.58	5174.39	1716.91			149	0	0	FALSE	FALSE
126	M128T247	128.042	128.04	128.043	246.817	240.424	268.464	42	41	1367	1333.24	1836.92	1691.16	1294.01	1628.23	1250.61	1032.21	1452.05	1301.29	1284.43	2959.56	2016.77	2584.27	2258.85	3377.82	2036.85	3006.71	1933.93	3468.41	2980.5	2406.63	2809.61	1966.51	1231.1	3150.86	2072.31	1300.93	2722.37	768.3	2390.55	3878.44	1856.11			15	0	0	FALSE	FALSE
127	M129T360	128.953	128.952	128.954	359.801	354.032	363.695	72	72	8009	486.733	139.705	760.076	182.701	727.569	250.392	137.736	256.463	440.66	409.668	8389.05	7185.54	9851.6	8679.27	7872.96	9266.88	9207.63	9351.65	8015.2	7429.48	8059.25	8942.5	8655.88	1640.72	8385.25	1921.94	8073.24	1732.29	9446.96	1620.53	7777.55	2034.19			144	0	0	FALSE	FALSE
128	M129T347	129.054	129.053	129.055	346.519	341.231	350.499	46	46	1518	1349.91	1439.98	860.19	1350.35	1049.47	831.184	1273.65	1483.51	1173.08	1120.15	2909.29	2464.34	2543.11	3037.32	3176.24	3050.29	2961.91	3130.51	2767.03	2650.8	3052.91	2502.48	1597.91	770.258	1141.14	1153.38	990.506	1143.21	1719.47	1105.48	1058.83	941.592		[M+H-H20]+ 146.059	54	0	0	FALSE	FALSE
129	M129T365	129.065	129.064	129.066	364.7	359.137	396.077	60	55	1367	5986.44	6313.98	6527.6	6018.66	5228.46	5049.5	4046.89	7311.37	4369.6	4507.05	3222.93	3004.11	3126.71	4727.16	3296.27	3839.3	5597.86	3376.17	3526.65	4092.54	3545.18	3716.29	1604.34	1939.44	1344.33	1670.26	1608.79	1783.37	1768.66	1790.49	1613.2	1865.55			21	6	7	FALSE	FALSE
130	M130T376	130.049	130.048	130.05	375.67	367.481	389.72	109	77	161219	10833.8	21867.6	16388	20739.2	11306.7	24298.9	16901.6	24114.5	11577.5	23204.9	177409	103225	96818.9	109654	105094	117782	194712	110264	106994	103174	102402	104974	35361.8	35655.7	42227.2	33345.8	36098.8	58435.1	58458.4	36166.1	32959.9	31694.2	[5][M]+		34	62	293	TRUE	FALSE
131	M130T430	130.049	130.048	130.05	429.67	426.181	435.868	75	75	25835	5244.3	17194.1	5002.12	9296.07	5232.07	15530.4	5252.25	6908.92	5971.13	9601.94	39251.5	46907.6	38500.1	28786	32338.9	34240.5	35768.2	29499.7	28042.7	38223.3	40672.4	32859.1	19224.3	19249.8	23916.1	6631.87	9398.07	10099.8	9745.09	10008.4	18590.4	9441.23		[M+H]+ 129.042	78	51	15	TRUE	FALSE
132	M130T399	130.049	130.048	130.05	399.247	390.832	417.741	105	72	54465	6568.89	9252.06	5808.91	8324.41	6314.82	8635.62	3646.66	9048.85	7170.88	10025	100326	98767.8	98163.3	106732	101763	105758	106286	102889	99561.1	95540.9	102631	94266.2	18065.9	14691.9	14789.5	16056.7	15446.6	14939.8	17355.3	12592.5	15234.3	13960.8	[6][M]+	[M+H-H20]+ 147.054	67	50	293	TRUE	TRUE
133	M130T527	130.086	130.085	130.086	527.272	520.462	546.368	73	64	6990	21614.6	25485.9	19468.2	20095.5	19213.5	14015.6	10699.6	9286.85	3090.27	14005.3	14726.3	6451.65	10638.4	24614.6	21726.2	20314.7	14024.3	12990	19187	10412.5	16301.5	20293.9	51428	70918.8	73749.7	58426.2	66492.5	64703	67462.1	51345.8	55537.8	70129.7		[M+H]+ 129.078	158	17	9	FALSE	FALSE
134	M130T311	130.086	130.085	130.087	311.107	302.2	318.149	47	47	2050	2565.69	1230.78	838.692	1404.63	1717.25	3857.17	1218.86	2969.17	1364.24	3579.45	3569.32	1993.34	3019.37	4060.07	3965.29	1449.55	4113.51	3865.44	4858.19	3608.34	1691.01	1118.72	2931.96	3236.11	3293.15	3490.81	3617.09	3510.69	3895.48	3512.72	3857.08	3358.48			37	12	144	TRUE	TRUE
135	M130T268	130.097	130.096	130.098	268.465	253.664	270.663	83	82	37073	12933.4	13606.4	2224.79	13365	10393.6	17177.8	15123.3	15789.8	11043.3	16088.2	24681.2	26173.9	23824.4	23357.5	23176.3	24291.6	26227.1	27432.3	25653.8	31646.4	25024.6	27842.1	18960.6	18304.5	22121.5	20571.9	20640.3	19735.3	20758	18126.4	22313.8	17585.3			48	26	116	TRUE	FALSE
136	M130T161	130.159	130.158	130.161	160.721	157.483	170.103	126	82	29470	22725.2	21987.4	25302.2	18108.4	21109.1	42088.9	19142.8	16458.9	28942.8	17445.7	31481.7	23155.5	20124.3	46736.9	23427.8	25527.2	25076.1	28150.8	24311.7	29898	25322.8	21572.6	12194.5	12765.7	9991.04	27040.7	13728.9	12778.4	10064.4	14990	9293.47	14865.8	[7][M]+	[M+Na]+ 107.175 [M+H]+ 129.158	9	48	12	FALSE	FALSE
137	M131T303	130.525	130.524	130.527	302.628	299.537	305.931	66	66	2019	289.639	1370.03	616.274	1025.68	641.934	375.423	999.411	594.865	261.428	644.629	1529.23	1928.8	787.604	1440.14	1904.71	1760.47	1836.27	1620.88	4054.37	2846.36	1717.66	1866.96	1988.72	3414.88	3924.46	2951.27	3022.8	4187.7	2413.58	3125.97	1701.28	2130.53			23	0	0	FALSE	FALSE
138	M131T198	131.049	131.048	131.05	198.018	184.728	207.974	82	74	7217	8440.59	7047.06	7565.72	5932.09	2874.29	11193.7	11193.5	9019.62	7317.85	6847.25	15080.8	14252.6	13605.9	14465.8	14627.9	14708.6	16875	14481.1	16830.3	13093.2	16121	13878.2	6659.06	4238.11	5028.47	4500.8	5099.36	4419.99	5775.57	4947.66	6188.86	4431.67		[M+Na]+ 108.059 [M+H]+ 130.041	30	8	17	FALSE	FALSE
139	M131T39	131.049	131.047	131.05	38.554	26.662	70.324	89	82	10415	837.038	8379.14	5962.98	7284.14	5729.65	9202.4	9437.16	7110.28	7840.45	7144	44153.6	16588.9	27337.2	44770	51887.2	25971.6	32936.1	13044.2	34366.2	35734.4	19673.6	49525.7	33158.2	44789.9	56626.9	46661.5	37605.5	46597.4	51275	33047.7	38675.7	43345.3			2	3	70	TRUE	TRUE
140	M131T162	131.049	131.048	131.049	161.997	152.097	166.806	60	60	3433	8102.26	12791.6	7896.57	14054.8	12301.8	14240	8295.23	11704.2	10790.5	14086.3	24249.5	31551.5	15015	15021	17487.4	25083.1	21636.4	23402.4	13853.2	25127.3	16863	23190.2	13230.5	13925.6	6916.46	14525.7	12244.2	14513.9	13298.6	14131.8	12379.3	13005		[M+H]+ 130.041	9	7	17	TRUE	FALSE
141	M131T399	131.053	131.052	131.054	399.019	389.72	416.12	64	61	2257	611.163	561.445	333.773	716.33	537.687	542.902	458.281	845.679	524.591	975.57	3794.22	4800.53	3894.53	5345.78	5206.3	6285.89	5751.54	5909.96	4051.12	5550.35	4942.02	3912.26	1099.68	1102.79	885.271	803.035	1267.97	1042.03	863.923	878.739	537.102	958.115	[6][M+1]+		67	0	0	FALSE	FALSE
142	M131T375	131.053	131.051	131.053	374.963	371.458	380.436	53	53	5886	786.495	1132.64	774.249	940.017	869.157	1440.33	1064.14	817.153	720.214	1021.27	6062.46	7856.3	6746.1	6243.69	5336.18	6764.46	7500.63	7895.11	7342.13	6281.7	6277.2	4791.55	2704.39	2453.81	1797.75	3040.47	3491.08	2555.21	3225.58	3446.32	2123.77	1797.56	[5][M+1]+		34	0	0	FALSE	FALSE
143	M131T36	131.085	131.083	131.087	35.9745	28.645	56.65	64	61	4784	3129.84	4392.99	2583.27	4279.93	3700.78	4806.55	4799.51	2398.75	4308.25	5206.63	11655.1	8402.07	8489.04	9311.76	7157.5	15377.4	4175.36	11570.6	7607.19	8026.71	13894.7	9046.97	18715.6	25717.9	14060.4	30281.4	21119.9	26860.3	28331.3	24219.5	21852.9	15861.2			1	7	28	TRUE	TRUE
144	M131T269	131.1	131.099	131.103	268.74	262.547	270.272	48	48	1774	481.045	881.421	404.172	857.285	226.297	436.817	938.815	589.1	1224.76	843.935	1154.1	1153.21	1191.98	1117.69	930.761	1417.16	1523.01	1307.13	843.03	1408.85	1228.16	1059.49	1064.97	1245.16	1097.26	1848.42	916.185	1293.12	976.338	1003.79	943.709	733.349			76	0	0	FALSE	FALSE
145	M131T160	131.162	131.16	131.163	160.002	157.483	168.534	67	60	1849	4695.7	2601.92	2327.96	1623.03	2457.95	1613.51	1841.81	1422.62	3078.03	1028.28	2087.62	2010.25	2066.87	2005.55	1567.6	1788.58	1574.05	1956.37	2770.92	2130.99	2408.46	1636.34	1171.09	1035.59	1259.66	1069.56	1501.51	1275	1185.12	822.147	1137.63	1577.53	[7][M+1]+		9	0	0	FALSE	FALSE
146	M132T192	132.044	132.043	132.052	192.439	182.039	200.253	50	49	1120	487.574	302.244	1004.88	356.478	350.207	235.445	545.62	334.661	661.877	513.076	2010	1834.39	2469.35	2014.29	858.233	2594.04	1673.08	1379	1770.19	1475.07	2336.12	1136.64	386.109	142.638	127.129	48.2026	328.146	201.675	287.287	505.837	306.461	215.09			39	0	0	FALSE	FALSE
147	M132T270	132.102	132.101	132.104	269.519	263.407	319.771	143	80	72878	29483.6	27103.9	26642.5	25911.2	29152.8	25821.2	27316.5	29608.2	31732.7	26845.2	42574.4	41916	39021.8	46846.1	43406	47030.3	52186.3	46912.2	36676.2	40235.3	40688.8	40095.8	282728	216517	255853	221778	266515	236892	282927	244726	286763	245787			76	43	81	TRUE	FALSE
148	M133T381	133.06	133.06	133.061	381.483	377.354	395.472	64	63	2821	6982.32	8223.36	9438.39	8826.25	9655.7	8846.09	7428.22	8860.99	8926.85	8185.3	6428.38	8063.02	9603.25	7754.85	8494.39	8294.33	6684.69	5582.34	8740.38	6543.13	7059.18	7200.38	19205.5	21318.6	15250.7	19892.5	17567.7	19277	24637.7	19552.4	16647.4	19297.3		[M+H]+ 132.05	80	0	0	FALSE	FALSE
149	M133T42	133.064	133.063	133.066	41.737	29.792	54.828	56	52	6318	4544.03	3107.24	5162.89	4598.69	4321.78	2816.68	10075.4	3116.93	3133.83	6059.9	15514.4	7525.5	35924.9	29459.6	29369.2	31514.3	5390	16793.2	9810.67	8410.49	4004.52	32361.8	19835.9	26099.6	38546.6	31235.4	31359.6	19894	37350.3	21742.1	35661.7	28482.9		[M+K]+ 94.1022 [M+H-H20]+ 150.07	7	3	30	TRUE	TRUE
150	M133T125	133.064	133.064	133.065	125.255	110.271	136.841	45	42	5087	12474.6	11539.5	11162.2	10692.3	10570.2	11787.1	12540.2	12603.6	12068.4	11307.7	13286.4	17604.7	28158.3	28930	37185.3	22933.1	15930.9	16969.1	40840.5	21441.2	15270	22062.7	12124.1	15771.7	13338.7	15444.5	13945.5	15497.3	13838.6	16005.9	12792.6	15163.5		[M+H]+ 132.061	13	13	32	TRUE	TRUE
151	M133T183	133.064	133.062	133.066	183.267	172.552	188.991	47	44	3850	7899.42	3920.57	3389.95	3832.78	2697.19	1425.54	6996.54	7571.13	3367.41	3578.05	16594.1	13188.6	6953.57	6122.66	15098.6	15147.7	7747.65	13856.2	14442.7	8506.79	8441.73	10347.6	19521.3	6764.92	13218.7	5860.1	5949.15	4690.01	19481.5	15334.8	16881.9	25641.1		[M+K]+ 94.1033	29	12	36	TRUE	TRUE
152	M133T162	133.101	133.1	133.101	162.473	150.395	184.417	96	79	8325	15934	47860.2	26482.4	21376.6	31773.6	45349.5	42572.4	26060.2	53706.1	22873.8	80122.1	56413.2	54669.3	88152.8	64767.3	57454.9	52222.5	77814.9	52213.4	75111.5	75375.8	55350.6	29289.5	36370.2	29415.3	43891	9806.32	34886.3	36335.2	11497.3	12444.5	7415.33		[M+Na]+ 110.115 [M+H]+ 132.097 [M+H-H20]+ 150.106	9	19	36	TRUE	FALSE
153	M133T41	133.101	133.099	133.103	40.7155	28.399	53.968	64	58	6318	12161.6	5751.48	13035.5	2497.75	10640.3	10332.6	11345.7	5364.49	11528.9	6733.11	29543.8	34496.2	45704.1	35366.4	20151.1	37383.9	29191.4	32690.8	19314.2	37732.3	24809.8	25063.7	27337.7	34770.5	25347.1	24092.8	41512.6	35211.9	37981	50554.3	33573.6	48073.9		[M+H-H20]+ 150.106	2	3	30	TRUE	TRUE
154	M134T408	134.044	134.043	134.047	408.357	400.892	419.954	85	81	3068	1875.53	2777.96	2398.54	2111.23	1660	2152.13	2942.28	5652.85	1574.27	3366.03	6313.33	8739.51	6488.18	9225.04	7456.8	6750.85	8955.51	7565.59	6979.77	8779.09	7448.72	7823.46	6195.74	5404.5	6488.75	6787.69	6661.79	5505.83	8356.54	5989.76	6923.5	5233.49			81	10	12	FALSE	FALSE
155	M134T32	134.096	134.095	134.097	31.67	26.915	42.602	88	82	566195	41462	19098.1	42279.6	22601.7	40483.5	20882.7	21658.8	23057.8	45977.8	21765.7	1.38287e+06	1.40966e+06	1.27618e+06	1.12586e+06	1021020	1.12228e+06	1.03598e+06	1.0272e+06	1.17149e+06	1.25179e+06	1.34841e+06	1.32472e+06	28039.5	116522	23252.6	143761	30111.4	155566	32698.6	155011	32879.9	146406	[8][M]+	[M+H-2H2O]+ 169.112	3	45	1125	TRUE	FALSE
156	M134T55	134.096	134.095	134.097	55.448	45.639	69.54	51	41	126823	3581.89	1728.35	6343.38	2160.85	5873.1	1911.92	2787.47	2185.44	4039.84	2860.94	484838	261860	304434	286391	276059	255199	275633	311978	644814	283071	317401	401496	2663.3	11987.6	3632.03	10405.9	3493.61	9414.86	3245.35	5365.8	3496.56	6616.3		[M+H]+ 133.095	8	46	1125	TRUE	TRUE
157	M134T180	134.096	134.095	134.105	179.86	166.548	181.963	64	63	5246	1453.24	1013.04	913.476	1308.22	1760.1	1660.09	1167.06	1757.04	1190.13	1398.48	16106.6	17411.6	13430.5	15150.4	18435.8	15420	19633	16295.7	13855.6	14765.8	21544.6	26863.9	3572.17	3795.33	3259.57	4591.14	2669.53	3175.45	3746.84	4769.81	2230.21	3424.66			14	2	27	TRUE	TRUE
158	M134T243	134.096	134.094	134.107	243.496	235.931	278.821	68	58	3139	321.867	380.332	268.895	204.583	295.999	225.806	383.963	451.496	353.697	560.16	17029.4	7083.34	13170.5	8137.41	11569.2	9415.63	12344.2	10253.3	12206.2	14331.1	15772	17171.2	573.518	952.996	770.606	802.522	895.109	709.656	449.575	647.799	826.546	1042.75			31	1	13	FALSE	FALSE
159	M135T38	135.08	135.078	135.082	37.6445	29.078	54.483	60	55	34701	13014.4	13931.3	11546.8	13062.7	14784.2	14851.1	12225.6	12622.1	12355.2	11753.9	18794.8	19504.2	116861	13159.2	22908.8	112035	25226	114321	6212.83	133072	33006.6	12769.6	43041.8	52781.7	35051.6	56908	48241.7	11327.3	48287.3	49136.1	42939.7	8797.25			1	3	43	TRUE	TRUE
160	M135T155	135.08	135.079	135.082	155.205	130.909	193.832	109	69	9426	19742.4	13213.9	13444.5	9523.18	21312.2	8193.93	14624	4699.13	4611.6	8483.7	27276.5	25363.5	28111.3	34307.1	29570.2	27706.3	24696.2	25065.5	23706.6	16866	34315.4	26821.8	10320.5	6522.19	13127	7178.6	6844.54	11294.7	15866.2	16841.6	9379.79	11173.4			46	4	58	TRUE	FALSE
161	M135T103	135.08	135.08	135.081	103.444	82.541	128.121	68	44	7518	7430.03	8215.04	7672.56	8691.66	7232.43	2396.94	8576.11	9513	7659.47	9277.97	26427	4129.78	46650.5	4484.7	97474.1	37399.3	98665.4	84949.1	30330.9	48487.9	22692	34402.5	10755.6	11490.8	11619.6	12408.8	11604	12439.2	12035.2	13384.6	11024.9	12847.1			73	9	40	TRUE	FALSE
162	M135T32	135.099	135.098	135.102	31.623	26.915	42.363	85	81	44416	5022.8	2528.71	5190.99	2826.17	5249.12	2116.95	1613.33	2608.26	3776.03	2680.88	89203.7	89647.8	83420.4	81265.3	85616.5	80401.1	95053.1	101928	97339.8	101480	107867	88366	2480.1	13229.5	4007.16	13943.2	22946.5	14349.1	3052.08	13440.4	2895.46	10542.9	[8][M+1]+		3	0	0	FALSE	FALSE
163	M135T134	135.116	135.116	135.117	133.752	126.529	143.053	77	74	13157	41659.9	29019.5	26069.4	33298.7	33685.3	30852.3	35728.9	34419.5	31133.9	36492.6	92472.6	91203.2	80399.9	105151	143457	133920	114002	111035	82634	125874	95881.8	100693	16302.8	18560.1	16588	16628.8	17504.5	18591.8	17155.8	18183.5	16934.6	18431.3		[M+Na]+ 112.119	13	42	112	TRUE	FALSE
164	M135T92	135.116	135.116	135.117	92.475	74.95	103.267	45	42	8348	8978.22	10337.9	9698.62	10615.8	9181.27	10534.6	10281.5	11033.1	8991.55	10932.3	56408.5	63314.4	62437.5	50525.9	54837.1	63565.3	48291.8	48099.3	48517.1	43017.9	50543	66171	14871	13664	13726.3	6482.07	14434.2	15418.8	15602.7	15481.5	13903	15377.1			102	27	55	TRUE	FALSE
165	M136T162	136.061	136.06	136.062	162.056	160.114	190.272	109	82	559911	1.81721e+06	1.49882e+06	1.78833e+06	1.88686e+06	2.06039e+06	1.87639e+06	1.81326e+06	1.70294e+06	1.68363e+06	1.63128e+06	1.5822e+06	1.38384e+06	1.6513e+06	1.59976e+06	1.03071e+06	1.49789e+06	1.29659e+06	1.25196e+06	1.52785e+06	1.22575e+06	1.58675e+06	1.61266e+06	6.11567e+06	5.15975e+06	6.00029e+06	5.19546e+06	6.73265e+06	2.39381e+06	2.80357e+06	5.12158e+06	6.48767e+06	5.53916e+06		[M+NH4]+ 118.027	9	57	2835	TRUE	FALSE
166	M136T309	136.075	136.073	136.076	309.237	305.865	322.029	59	55	2416	1969.37	4499.48	2978.21	2236.05	913.662	4358.31	4786.21	5754.18	2708.91	4804.72	2153.15	2955.13	1928.22	1065.49	2702.63	2251.79	2818.94	1915	2207.31	2835.32	2691.84	3127.7	8069.16	10596.8	8360.05	10224.5	9369.72	10554.2	8193.51	11219.9	8636.31	9218.59			37	0	0	FALSE	FALSE
167	M136T133	136.119	136.111	136.122	133.155	113.38	152.097	83	70	50820	3549.83	2444.93	2687.62	2665.58	432164	3921.94	2065.95	216638	461131	2380.6	13022.3	8484.75	8762.72	2248.17	11837.3	10334.3	6490.62	9931.92	9756.29	9542.28	13683.2	5348.26	777.499	7881.9	14951.2	7389.42	15195.8	7667.18	13908.8	7570	13680	7199.91		[M+NH4]+ 118.081	13	5	75	TRUE	FALSE
168	M137T331	136.94	136.939	136.94	330.7	329.643	338.003	82	82	18837	22745.8	24711.3	25518.6	25180.6	23664.6	25231	25299.2	24336.8	21561.8	23663.1	82187.6	71855	67067.2	75626.2	84194.2	89848.1	90515.2	84651.4	82469.3	86914.7	79358.3	79777.5	97961	97562.8	112533	88251.7	109472	98426.1	116204	98310.2	113102	88409.1	[9][M]+	[M+H-H20]+ 153.945	89	0	0	FALSE	FALSE
169	M137T68	137.059	137.059	137.06	67.722	54.934	92.45	90	71	51483	68657.1	59630.5	45807.2	82898.8	78102	36210.2	63334.5	43805.5	46334.1	54948.7	86228.5	89575.5	26961.6	103761	201347	107092	186145	101702	151691	83714	96561.6	95821.5	392163	689894	1.07316e+06	522294	807671	746547	815378	681794	847155	848097			63	31	144	TRUE	TRUE
170	M137T125	137.059	137.059	137.06	124.679	109.387	134.601	69	61	14665	57596.2	91087.2	31965.3	68664.6	53593.6	73918.7	60516.4	77293.2	34112.1	100936	151522	127981	141838	185599	94971.7	121683	88597.9	157704	185291	176946	71751.2	145467	204067	111214	151311	111208	167800	136173	176591	130476	307962	145316		[M+H]+ 136.054	13	53	165	TRUE	TRUE
171	M137T284	137.059	137.058	137.06	284.465	280.048	288.051	57	57	5560	24566	18485.5	26104.9	18723.5	25374.6	22338.2	21566.3	21003.8	27848.1	26710.3	7623.4	6578.8	6874.32	6709.07	8818.12	7475.02	8217.14	6191.22	7076.27	6328.83	7384.23	7364.47	5093.47	13054.9	12118.4	14982.3	4451.7	14584.8	14299.9	14455.5	4969.4	15765.2			126	39	92	TRUE	TRUE
172	M137T195	137.059	137.059	137.06	195.012	183.588	208.063	71	64	56912	608131	92821.8	261136	90818.1	463631	100974	98549.1	163814	160396	330669	84727.4	89220.2	97923.6	76544.7	84464.4	88101.5	93752.8	73921.7	91499.6	84062.1	92540.6	86962.6	245071	84399	125025	90985.5	136688	175771	135021	177563	149226	100976	[10][M]+		18	41	165	TRUE	FALSE
173	M137T219	137.059	137.059	137.06	219.379	213.47	221.894	49	49	14185	34566.7	26715.7	31727.4	38789	39196.9	23917.2	28427.8	43603.2	35722.2	28916.8	150237	69416	63912.9	110390	134474	67313.1	66571.9	62076.8	54926.3	51830.2	143655	99209.1	51061.6	16785.7	49681	25892.1	49251.9	20664.4	56370	19556.8	61130.2	19335.9			20	32	65	TRUE	FALSE
174	M137T44	137.059	137.058	137.06	44.02	37.363	53.783	51	48	106895	112385	124095	107305	119739	100282	131952	136281	132994	122419	142357	41608.3	30784.7	32740.7	37703.6	32330.3	32162.8	30882	32450	20993.6	32982.8	59312.2	14210.4	1.10181e+06	670430	721716	816452	1.00162e+06	952087	1.16347e+06	1.01622e+06	804110	584416			7	23	446	TRUE	FALSE
175	M137T166	137.059	137.059	137.065	166.326	160.501	175.5	90	78	25219	298583	246676	268458	263753	274833	328013	326596	367965	312493	339469	284286	178172	167839	176691	149358	149352	203685	183594	180885	93597.7	271795	189137	245326	72630	174671	199209	93050.9	193515	227422	197076	165997	162807	[11][M]+		87	66	63	TRUE	TRUE
176	M137T321	137.08	137.078	137.082	321.335	319.733	325.671	68	68	1859	11850.8	10075.1	12080.5	10865.3	12731.4	12712.3	11301.9	11538.5	13569.3	12297.5	3895.57	1925.54	11653.6	2317.37	2251.08	3537.01	2963.55	8295.46	9307.13	10045.6	2563.31	2544.6	3120.92	5651.55	3348.34	4431.16	3836.38	5135.04	3740.79	5845.05	2985.19	4540.87			5	0	0	FALSE	FALSE
177	M137T37	137.095	137.094	137.097	37.3095	29.593	53.956	62	60	25286	3932.16	2257.19	3576.61	1312.16	2543.05	144744	5138.58	2678.67	142692	5508.36	43070.7	10507.2	13017.3	12838.7	36359.5	35583.8	34590.9	33632.8	15902.7	37730.1	16295.8	10846.2	16278	22120.1	20389.8	22906.2	15087.2	15883.2	18644.2	20214.8	14593	18184.3			1	3	59	TRUE	TRUE
178	M137T167	137.095	137.094	137.098	166.697	148.126	186.043	64	48	24510	22980	10786.3	24524.4	13452.1	22696.7	12183.5	9995	23316.3	13490.4	13887.8	19443.9	12774.4	17645.6	149592	145332	1375.56	163693	142908	156358	13771.2	173664	165725	11521.1	12300.8	9921.96	18130.5	5582.49	12801	7321.33	3075.05	187034	9263.51			82	2	87	TRUE	TRUE
179	M137T22	137.132	137.131	137.133	21.9945	18.056	25.765	58	58	31239	39567.3	32989.5	37223.6	36225.9	41396.5	42653.4	42406.3	43163.2	40281.2	38101.5	42079.7	37746.5	25061.2	32178.7	31433.9	16393.5	25120.7	32963	22512.4	30637.1	27032.5	28061.7	51800.2	43929.4	62674.2	46216.3	65239.3	32737.3	61355.3	52571.8	57080.2	40655.1			115	1	59	TRUE	TRUE
180	M138T331	137.943	137.942	137.944	331.129	329.59	336.608	53	53	351	292.88	587.699	288.831	613.088	303.209	276.255	383.079	337.04	263.681	185.71	932.85	802.784	881.047	1224.05	1180.38	1017.73	955.851	974.821	1032.71	996.016	663.824	876.128	983.279	881.4	1214.39	906.03	951.441	852.288	1035.77	1086.2	1143.7	848.868	[9][M+1]+		89	0	0	FALSE	FALSE
181	M138T167	138.063	138.061	138.066	166.567	148.088	174.424	65	61	2322	13351.8	21878.9	22354.1	20216.4	20446.9	20642.2	23428.8	24195.4	22228.1	14103.2	23062.3	12950.2	19459.5	7620.97	6842.06	15377	16080.2	13399	12453.9	8614.72	17180.3	15269.7	4484.85	3181.3	2902.95	12494.3	16611.9	12581.5	14362.9	4078.77	16157.4	6271.32	[11][M+1]+		87	0	0	FALSE	FALSE
182	M138T196	138.063	138.062	138.063	196.007	183.966	208.263	46	41	4726	25513.4	18927.3	35081.5	19957.4	33494.8	19228.5	18851.7	12932.9	20218.3	24993.2	7283.72	6581.19	7546.11	6802.67	6912.84	7477.22	7476.21	6274.72	5930.41	5797.79	7470.38	6809.68	7763.33	1391.52	7926.51	5948.15	8560.56	5419.4	7857.02	6009.5	8452.78	1694.81	[10][M+1]+		18	0	0	FALSE	FALSE
183	M138T212	138.091	138.089	138.092	212.483	200.537	216.501	65	59	4784	16617.2	14391.3	15915.8	17076.9	14568.2	11822.3	13777.9	21461.1	20337.9	14391	2143.76	2119.39	1876.2	1884.83	2964.93	1147.15	1862.1	1478.52	4159.48	1372.36	1413.29	1920.36	2655.23	2451.37	2241.47	2027.37	2518.41	2767.78	3160.76	3089.26	2857.71	2657.21		[M+Na]+ 115.1	56	0	0	FALSE	FALSE
184	M139T331	138.938	138.937	138.938	330.923	329.706	337.958	82	82	2228	3403.16	4121.15	3925.8	3476.73	3220.92	4364.91	3351.18	3257.27	3057.73	3049.39	7518.5	6491.03	6722.48	8151.64	8517.62	9118.07	9280.66	8601.62	8251.99	8082.19	7525.46	7256.51	8859	8073.26	10763	8322.76	10251.5	9089.95	9801.84	9303.01	9778.16	7565.63	[9][M+2]+		89	2	3	TRUE	FALSE
185	M139T342	139.039	139.037	139.041	342.111	339.813	360.897	67	65	2058	3016.19	528.87	2941	3599.2	1433.55	1906.2	1886.63	10439.8	1610.67	6821.98	3687.69	3824.13	2400.71	2551.6	3687.19	3862.5	2902.29	2889.96	2936.66	3316.08	2452.52	2496.71	413.673	344.478	404.026	235.086	300.652	339.336	499.199	447.759	358.836	218.692			25	0	0	FALSE	FALSE
186	M139T197	139.039	139.036	139.043	196.561	183.985	207.974	43	43	2426	1650.46	3330.12	780.491	2752.67	1141.72	3572.52	1682.83	1288.69	2366.79	2780.86	3303.14	5332.69	5540.93	5667.89	6657.32	4591.58	908.507	5678.99	6356.2	4907.95	5549.4	5759.94	1528.71	1716.03	1257.02	1374.89	1814.73	1395.17	1997.77	2060.02	1693.69	1583.17			122	0	0	FALSE	FALSE
187	M139T42	139.074	139.067	139.076	42.2555	31.759	64.985	46	42	2050	2033.11	5974.44	13640.1	2460.09	3776.86	4563.63	6880.75	5451	15505.1	2909.3	1796.23	8362.87	567.467	5233.45	7554.1	1043.08	1013.12	4201.13	8207.13	7226.73	7336.45	8716.35	16778.3	2933.72	4677.08	4736.26	5043.78	5971.69	6957.8	17455.9	20776.4	6710.23		[M+2Na-H]+ 94.1022	7	0	0	FALSE	FALSE
188	M139T21	139.111	139.111	139.112	20.687	1.852	39.962	63	47	2335	16954	11764.8	13699.9	13167.3	12548.3	10025.3	11331.7	12221.8	14270.7	15966.1	10756.8	12844.4	23384.8	6008.11	17710.3	12647.5	7399.9	5112.94	11501.3	20280.4	17344.8	9887.49	4388.31	5444.6	12392.5	36427.9	12020.3	10983.3	11496.2	29588.3	13656.5	15261.9			115	1	27	TRUE	TRUE
189	M140T156	140.001	140.001	140.002	156.285	150.246	159.227	75	75	20258	142796	174900	228493	234347	294010	214084	256222	265737	161613	240068	127159	168794	174728	105093	124823	107114	64178.9	90851.1	195393	141200	134451	153709	60148.7	175558	159677	299548	292733	134552	97753.7	232580	81980.5	106737		[M+K]+ 101.041	46	62	15	FALSE	FALSE
190	M140T287	140.001	140.001	140.002	286.891	280.928	293.571	77	77	17243	158798	173183	188485	168641	182820	178426	201812	151962	108590	111506	138743	177345	178613	119344	135101	141101	94679.3	147460	221751	122605	184864	103086	100883	137982	126465	173240	148806	138590	108544	128943	97884.5	115269		[M+CH3CN+Na]+ 75.9855 [M+CH3CN+H]+ 97.9674	136	77	7	FALSE	TRUE
191	M140T233	140.002	140.001	140.002	232.543	221.621	242.036	78	75	19845	69605.7	97278.4	108026	78343.9	84436.7	48637.3	66303	80416.8	97550.6	55902.8	162385	173892	123980	116423	113172	120568	79220.4	105875	205786	162844	171079	189016	599134	402553	526715	519124	508354	489892	128656	411022	381004	456425		[M+Na]+ 117.012 [M+H]+ 138.994	52	46	7	FALSE	TRUE
192	M140T46	140.001	139.998	140.003	46.213	39.41	51.047	65	65	7086	10520.4	9794.7	15090.6	11917.9	11494.8	12123.5	11477.5	9272.39	13440.7	12786.4	8087	7669.26	7739.99	7397.7	4993.41	6127.81	4237.42	3409.92	12826.5	8114.79	8751.76	11043.2	7068.06	7252.24	10507	8273.16	11696.8	6572.36	7616.15	6594.88	6603.17	6105.07			12	7	26	FALSE	TRUE
193	M140T317	140.001	140.001	140.002	316.554	310.36	326.409	70	66	10765	100628	87576	124047	102064	117468	79971.2	93443.9	100240	83084.5	95405.4	121223	117216	98532.5	105802	94168	107710	89659.1	93299.5	148399	122549	128397	124776	107550	104629	120358	91787.3	118563	65507.4	109857	102067	95502	44077.8		[M+CH3CN+Na]+ 75.9855 [M+CH3CN+H]+ 97.9675	84	60	12	FALSE	TRUE
194	M140T185	140.001	140	140.002	185.171	173.621	194.295	81	71	17586	96526.6	288540	145706	114354	129056	86708.1	291387	240564	122732	90626.9	130954	104205	44686.7	112157	104563	100620	158358	106200	196960	122445	152384	152118	112304	143131	136210	127446	99431.6	128506	100753	121402	82927.5	93254.6			29	54	18	TRUE	FALSE
195	M140T271	140.001	140.001	140.002	271.026	265.252	272.951	50	50	15704	73777.7	138686	141407	136747	140358	152853	104704	119025	89550.1	74978.2	99798	122880	140634	74868.1	78734.1	97990.7	63885.3	84094.9	141416	112567	143286	123774	54605.2	72878.8	65198.6	86506.9	82008.1	64774.1	77257.3	85731.7	67469.4	60315.1			99	51	7	FALSE	TRUE
196	M140T208	140.001	140.001	140.002	208.186	203.582	219.147	58	54	22213	43640	48579.8	57926.9	49842.8	59757.9	54128.1	61592.9	45851.5	56199.3	40501.7	123916	136650	184421	90159.6	90249.1	127552	65829.3	101010	191922	195665	134199	153809	178041	152138	202297	186958	189185	162928	164896	152687	135109	154248		[M+CH3CN+Na]+ 75.9854 [M+CH3CN+H]+ 97.9674	72	59	7	FALSE	FALSE
197	M140T494	140.002	140.001	140.002	494.289	466.175	521.747	69	42	9265	77828.3	88598	97481.8	106267	88355.4	89545.7	69530.3	86454.9	85520.3	30300.1	107771	101408	206931	38775.7	34824.1	60885.1	148451	74332.2	60065.5	117895	104231	131057	85947.4	35171.6	97474.2	84907.8	221345	43376	81269.3	188929	43489.8	53717			116	72	5	FALSE	FALSE
198	M140T272	140.068	140.067	140.069	271.718	267.717	273.147	81	81	16962	5248.31	4004.21	6500.02	4521.71	6825.91	6045.12	4744.52	4076.5	6906.69	3537.53	5764.21	7403.87	6177.29	3534.39	3874.59	4735.93	3588.32	3476.34	5732.44	6888.55	6625.64	6953.38	2983.16	2167.19	1689.42	2783.46	2388.48	2407.25	3160.11	2221.33	2620.21	3186.41		[M+Na]+ 117.079	99	24	14	TRUE	FALSE
199	M140T126	140.07	140.067	140.071	125.796	120.073	143.618	61	59	1370	4183.53	3583.87	3385.29	3922.7	3681.61	3635.55	3142.33	401.963	6751.13	3540.42	3809.45	7343.98	4054.49	6650.72	6256.68	4629.79	2087.1	3360	3860.15	4601.07	5211.31	5799.69	5432.06	5055.96	5685.6	3716.49	5365.3	5682.79	5390.04	5072.46	5611.01	5022.29		[M+K]+ 101.108	13	1	34	TRUE	FALSE
200	M141T351	141.018	141.017	141.02	350.709	349.095	352.458	44	44	703	527.311	913.772	1487.72	692.794	611.656	784.478	764.834	441.339	520.823	626.23	934.237	576.583	540.678	946.102	1134.32	700.405	971.597	770.327	1034.4	594.61	478.154	1054.86	1482.71	602.064	1031.97	936.349	754.522	714.324	1425.48	698.494	1152.09	629.184		[M+H-2H2O]+ 176.031	79	0	0	FALSE	FALSE
201	M141T246	141.054	141.053	141.055	246.233	239.918	250.305	72	72	7800	10604	10597.2	8523.44	10034.8	10463.6	9178.78	10723.2	10749.5	10133.2	9923.4	39279.5	36423.9	36816.6	43781.5	41523.9	40955.9	45647.1	90571.2	36505.1	37016.3	97704.8	40227.9	35216.3	27205.1	36230.2	32132.8	39037.4	28683.5	37683	30216.1	36992.6	30168.2		[M+CH3COO+2H]+ 80.0256	15	12	50	TRUE	TRUE
202	M141T148	141.054	141.053	141.055	147.709	135.79	151.882	65	65	251168	75243.6	63628.2	64922.4	56006.5	63502.5	67885.6	61210.9	75335.3	77203.1	72093.5	925304	888960	826412	844093	780939	818282	811100	734503	656007	708389	864993	766070	8245.11	14427	8402.72	15551.9	7807.22	17586	9204.44	16985.2	8398.32	16196.9	[12][M]+		24	53	1500	TRUE	FALSE
203	M141T377	141.054	141.053	141.056	377.363	365.221	393.287	61	54	1040	1463.53	1103.52	1372.38	1449.57	1417.01	1284.68	1498.44	1352.48	1446.17	1086.85	1822.88	1058.16	2115.58	2182.55	1219.88	1791.92	1547.9	1565.21	958.654	1443.02	736.083	2325.31	1180.35	1671.57	2768.21	1279.07	1967.76	1588.74	2388.24	1588.44	2110.19	1443.92			34	0	0	FALSE	FALSE
204	M141T101	141.054	141.054	141.055	101.101	72.467	115.869	62	49	8070	10551.1	10195.5	7747.02	11029.2	7907.77	12053.9	12395.3	13291.9	9828.26	13570.5	69127.3	79192.1	29274.5	81812.6	85228.6	65196.7	88095.1	76502.1	37519.4	32230	83840.7	79456.2	4982.04	5682.63	5159.16	5890.19	5394.4	5875.34	5464.03	5954.76	5311.94	5310.02			160	32	3807	TRUE	TRUE
205	M141T222	141.065	141.054	141.068	222.155	194.033	232.43	64	54	6693	28766.7	29440.8	60603.1	47778.4	23927.1	34299.1	46917.3	64484.8	133314	58823.2	16023.9	26412.2	16677.1	18002.2	40309.4	24301.4	26889.8	20070.2	22420.2	18667.5	21563.3	24809.3	712.354	1639.4	1618.16	1706.72	1836.82	1559.48	1086.54	1939.59	2145.93	2099.61			32	15	1500	TRUE	TRUE
206	M141T135	141.09	141.084	141.092	134.651	126.348	147.884	67	61	151031	22628.1	3018.35	15012.2	6537.01	16434.1	10596.6	10417.8	14566.7	24192.5	14989.3	4833.2	6161.62	2763.12	8294.87	8160.99	7323.14	7385.22	3859.83	4585.05	7694.88	8721.14	4070.84	3998.36	4021.3	3732.17	4604.99	4706.66	4819.12	4664.07	4644.33	4119.47	4403.66		[M+Na]+ 118.107 [M+H]+ 140.086	13	0	0	FALSE	FALSE
207	M142T148	142.058	142.049	142.058	147.815	126.109	154.345	56	54	13029	2446.32	3691.79	3171.5	3576.81	3989.51	3783.3	3438.21	4076.94	5288.66	4377.38	36457.8	33617	31934.1	35361.2	37571.7	36076.4	37836.7	31019.3	29353.6	26045.2	34913	30755.5	1774.46	1775.87	1687.13	2202.85	1712.78	1597.39	2212.39	1969.36	1610.22	2055.34	[12][M+1]+		24	0	0	FALSE	FALSE
208	M142T246	142.057	142.055	142.059	246.374	240.902	250.305	49	49	1367	375.474	756.544	363.645	623.363	327.007	204.178	381.2	821.014	628.205	884.054	2018.57	2970.11	2356.35	2072.12	1899.41	3258.14	2475.31	2840.42	1589.82	2629.36	872.04	1868.5	2157.95	1645.62	1773.91	1947.75	2736.58	1508.87	2466.24	1742.04	2518.42	1638.78			15	0	0	FALSE	FALSE
209	M143T150	143.059	143.057	143.071	149.682	145.195	156.478	53	53	1950	2866.25	3161.37	8676.74	8839.12	8467.55	1167.18	9182.83	2493.61	3247.31	8567.39	6937.63	3522.84	3906.93	6718.52	3697.65	2557.62	4094.69	2942.56	2219.45	1208.59	3664.47	2858.3	3073.48	5064.9	5891.17	5751.46	2807.34	5668.28	3857.6	7282.79	2523.84	7550.13	[12][M+2]+		24	0	0	FALSE	FALSE
210	M143T183	143.081	143.08	143.086	183.301	167.558	197.353	85	82	6615	17387.7	30377.5	18464.9	24602.1	18304.4	29146.2	29306.3	29810.7	19680.2	27119.7	21741.9	17512	16846.1	23668.7	25113.6	25684.6	29219.4	23402.6	19506	19281	22955.9	21775.4	20747.5	20521.7	19498.6	18719.1	18527	19758	20125.7	18655	20368.9	18977.6		[M+H]+ 142.067	29	4	28	TRUE	FALSE
211	M143T34	143.085	143.083	143.087	33.7325	28.3	42.273	62	60	3076	3768.88	3582.49	3494.52	3225.01	4057.63	3083.94	3427.28	3811.54	3979.56	3394.48	12068	9759.36	8332.45	5279.5	12798.8	10761.8	15108.5	9284.11	9796.69	9292.16	7607.4	8530.52	8154.68	13861.6	14640.5	16681	6644.84	8573.44	8478.08	15044.3	12836.3	12532.6			4	0	0	FALSE	FALSE
212	M144T190	144.044	144.043	144.045	189.828	180.231	192.278	53	53	2555	4416.59	1696.12	2511.8	1961.52	3677.58	2391.41	1597.58	2856.76	4065.49	2909.74	1255.43	1484.96	2576.74	1841.94	1874.39	1691.27	1937.31	2152.53	1477.67	1480.33	2026.32	2181.23	5140.38	5197.83	4211.07	6191.55	4627.07	6296.35	5285.97	6157.7	5494.86	7453.88		[M+K]+ 105.083	40	0	0	FALSE	FALSE
213	M144T350	144.047	144.046	144.048	349.673	346.263	352.321	76	76	1346	1709.13	3442.37	1629.53	2960.2	959.091	3383.42	2714.44	3257.74	1681.36	2961.93	2293.36	2168.18	2260.04	3020.08	2476.71	2323.63	2723.29	1911.81	2205.79	2394.72	2608.09	2683.01	2797.89	2897.76	2933.36	3377.25	2343.43	3471.27	3188.21	3778.19	3461.25	4084.79		[M+Na]+ 121.061	79	0	0	FALSE	FALSE
214	M144T273	144.102	144.1	144.103	273.054	268.936	297.283	130	82	32493	15659.1	5001.74	7020.9	6382.39	10507.9	6834.19	6160.37	7917.03	13212.6	9099.25	12167.4	15299.1	16124.6	10862.8	12825.4	12023.2	14403.4	11055.4	9362.23	12024.7	11673.5	11751.5	5431.27	4464.34	14034.2	5281.23	16705.2	24316.1	14988.3	7005.77	15202.4	31066.8			113	54	42	TRUE	FALSE
215	M144T318	144.101	144.1	144.102	317.678	316.275	320.208	47	47	2567	1221.34	1058.94	1319	1342.6	699.163	522.225	1012.34	1293.38	1446.69	737.062	3018.35	2879.78	3633.52	3009.82	2922.36	2518.24	3304.7	2792.4	2873.18	2764.87	3263.28	3001.58	1842.19	1759.37	1379.72	1542.97	1688.36	1110.81	1699.17	1446.73	1895.95	1699.77		[M+Na]+ 121.114	84	49	205	TRUE	TRUE
216	M144T358	144.101	144.101	144.102	357.514	355.845	373.215	52	51	3554	483.97	698.485	528.178	646.332	470.57	660.465	917.602	550.769	765.976	519.805	1543.94	1189.32	1204.86	1699.07	1838.24	1682.56	1517.43	1389.69	922.873	1058.53	1231.64	1370.07	8928.7	3045.09	6546.91	3923.02	8559.43	4930.36	9015.64	5583.59	7512.23	2900.02		[M+H]+ 143.094	97	47	205	TRUE	TRUE
217	M144T535	144.102	144.1	144.102	534.557	518.606	548.18	45	44	620	690.945	808.663	745.945	554.414	460.208	857.463	887.235	953.52	805.837	1021.92	1062.9	996.518	822	1287	1040.29	811.582	1108.15	1116.26	993.069	1140.88	1169.7	1203.58	852.05	2748.62	1083.43	91.207	1242.93	1473.77	1249.41	1324.02	1484.78	1472.16		[M+H]+ 143.094	169	0	0	FALSE	FALSE
218	M145T360	144.927	144.926	144.929	360.33	352.934	379.11	77	72	2913	525.002	461.688	812.614	266.235	607.223	149.009	326.893	409.973	810.034	369.535	6582.76	7557.35	8057.74	8817.42	6973.28	8539.02	8828.01	7732.94	7713.84	6692.18	7945.26	7175.59	8694.5	3509.22	8643.91	2963.03	8667.72	2991.79	9023.82	3395.44	8554.37	2847.62			148	0	0	FALSE	FALSE
219	M145T358	144.986	144.984	144.987	357.541	351.612	365.642	44	42	1453	2257.35	3925.38	1665.4	2885.06	3236.6	2362.41	2087.65	2646.38	3607.07	1592.76	527.798	589.401	443.33	1189.03	884.217	1262.35	1742.36	928.36	1266.84	1613.88	216.798	1052.09	998.833	737.57	831.185	800.3	934.353	582.038	637.793	722.008	583.998	760.961		[M+Na]+ 121.996	97	0	0	FALSE	FALSE
220	M145T255	145.049	145.048	145.05	254.589	242.213	259.139	82	82	3219	29014.9	29617.9	30577.2	32993.9	30838.1	28410.3	28854.7	37612	27613	34960.6	26424.5	20194.4	21611.4	26127.8	25469.7	22261.4	21718.5	22761.3	18874.2	21481.6	20007.2	18898.4	21519.5	29828.9	24265.3	24964.8	22562.8	26793.6	22546.1	29288.3	25291.8	22068.3		[M+CH3COO+2H]+ 84.0206 [M+Na]+ 122.06 [M+H]+ 144.042 [M+H-H20]+ 162.055	70	0	0	FALSE	FALSE
221	M145T414	145.049	145.047	145.051	413.943	409.145	431.248	50	46	668	1123.74	918.218	1058.7	1238.06	1346.65	1244.75	1543.04	1297.66	1399.74	1240.25	274.054	1979.75	1239.75	1493.53	1169.55	2107.35	2207.97	897.449	899.592	1257.08	962.917	1923.58	724.994	1113.98	1192.05	1055.92	1324.6	1254.25	1246.4	1154.68	1454.93	924.208		[M+CH3COO+2H]+ 84.0205	41	0	0	FALSE	FALSE
222	M145T35	145.064	145.061	145.065	34.565	29.143	49.26	60	54	3417	4091.46	3424.81	4926.18	3380.74	4452.94	4409.37	4326.21	4873.95	4228.24	4740	10395.6	12925.9	7883.29	5884.81	12257.7	15549.2	17443.1	7021.3	6746.57	7810.71	8245.92	5010.11	5620.1	6732.41	2614.79	16379	6957.67	6863.55	6410.15	5686.62	3354.7	15890			4	0	0	FALSE	FALSE
223	M145T37	145.101	145.099	145.103	36.5555	30.222	42.674	52	52	3417	3660.91	4367.11	5966.47	3863.9	3941.02	5228.1	5353.96	4257.81	2764.25	2753.32	19979.4	17501.3	19629.4	12706	20208.5	19201.5	19833.1	3108.86	19458.3	22219.5	25691.8	21091.9	32152	27941.1	19546	16462.5	20777.1	13510.4	22575.8	36677.3	20638.6	29664.5			1	1	24	TRUE	TRUE
224	M145T166	145.101	145.098	145.102	166.077	145.778	175.644	50	42	3076	14005.2	15024.2	15013.8	11766.8	12746.5	11614.1	14962.1	33754.6	21424.6	14279.6	16299.3	13791.3	7221.84	13247	9759.51	14059.3	12363.8	19428.3	9556.48	12428.1	15943.6	1632.22	6659.84	9151.71	10144.8	13144	9719.1	11699.3	9345.51	10653.3	12276.3	10725.9		[M+H-2H2O]+ 180.114	87	1	34	TRUE	TRUE
225	M146T389	146.021	146.019	146.022	389.007	378.851	394.613	54	54	1173	1276.83	1366.11	1485.34	1247.83	1349.72	1319.89	1227.77	1078.57	1218.81	1088.96	886.785	1339.43	974.612	1297.44	997.702	1044.25	1413.22	609.98	712.335	973.659	1043.1	1003.99	1351.8	389.852	969.992	541.952	1119.03	468.594	1077.22	574.185	401.181	519.589		[M+Na]+ 123.031	64	0	0	FALSE	FALSE
226	M146T358	146.092	146.091	146.093	357.76	355.845	371.519	90	82	11863	18278.9	34568.3	19680.6	35501.2	18539.3	33390.6	33748.2	36672.9	18695	34320.4	8921.38	8691.48	7163.07	13614.1	10507.5	10548.9	9921.35	8950.1	7859.21	7042.16	8475.14	7749.47	4938.91	11693	3122.95	11571.6	2853.7	12307	5066.25	11552.2	5320.67	12617.8			97	38	45	TRUE	FALSE
227	M147T223	147.044	147.043	147.044	223.005	210.159	228.466	85	67	189447	2657.79	1337.27	1589.1	1575.52	2720.86	1351.4	1810.68	1821.51	2972.62	1818.48	560867	524854	553964	298700	517428	291541	557193	494205	467818	502190	543951	492675	2294.59	6480.46	2188.08	9625.2	2425.44	9804.84	2228.82	6073.83	2530.98	9679.3	[13][M]+	[M+3Na-2H]+ 80.0877	32	49	426	TRUE	FALSE
228	M147T130	147.044	147.043	147.044	130.164	112.863	144.869	84	68	487281	21368.1	17173.9	12220.8	20212	19532.3	18920.9	20080.7	19323.6	19840.1	19392.9	3.26945e+06	3.01501e+06	3.12673e+06	2.93373e+06	2.93347e+06	2.9631e+06	2.96628e+06	2.7583e+06	2.73553e+06	2.75273e+06	2.9837e+06	1.2669e+06	11324.6	43466.3	9541.69	47653.5	10715	51359.7	11761.3	59419.4	11438.1	49452.9	[14][M]+		13	61	1187	TRUE	TRUE
229	M147T31	147.044	147.042	147.045	31.1725	28.351	43.575	54	52	5468	3914.24	6582	1394.91	6173.01	2988.71	5318.39	19265.8	4612.3	3462.3	6147.51	14774	14908.5	12015.8	12568.6	12570.7	12983.6	14126.5	13482.9	13290	11770.2	25426.7	16078.5	12166.9	29177.4	10463	8688.62	11484.9	27680.3	11238.2	11444.7	44897.2	8492.41		[M+H]+ 146.036	3	51	691	TRUE	TRUE
230	M147T372	147.044	147.043	147.046	372.367	353.478	381.644	69	59	3146	19776.5	12120.1	16519.4	14790.6	26637.6	11957.7	20393.3	13412.5	21139.3	13866.3	7157.84	5462.69	6260.28	6831.19	7177.39	4810.87	7722.33	6127.88	3257.63	5680.58	6168.67	4377.09	3791.93	4057.51	1757.44	1914.96	2285.37	2564.7	2185.83	1876.2	3769.15	3077.8			131	30	12	TRUE	FALSE
231	M147T280	147.044	147.042	147.045	280.395	275.633	307.459	71	57	10725	11664.4	8181.68	15713.5	9367.34	11735.8	8506.83	8397.65	9008.08	17785.3	9030.18	22800.7	19456.2	44058.8	21703.8	20476.8	18905.1	48904.1	13105.6	19496	19227	20392.6	21877.5	1437.41	1779.8	2389.39	1373.74	3143.43	1959.72	2235.15	1428.44	1772.28	2442.59			155	40	197	TRUE	TRUE
232	M147T326	147.044	147.043	147.045	325.51	315.747	332.832	52	52	7529	4921.07	3439.13	4484.62	3921.4	5850.73	3153.59	2786.3	4502.04	5683.63	3071.22	6358.41	5842.95	5899.55	7167.98	5202.29	5504.97	5518.39	5285.14	5857.2	5472.04	6605.98	6569.67	3301.29	4012.02	2968.8	2650.87	6945.55	7224.85	3584.15	3781.26	3809.1	2726.28			96	18	198	TRUE	TRUE
233	M147T180	147.044	147.043	147.044	180.463	164.314	202.688	53	46	26007	8048.24	4539.78	4634.24	4155.24	4960.48	8771.72	7905.64	6717.02	10741.6	8452.11	23975.8	29771.6	27964.4	31958.8	22821.7	22992.7	29033.9	24284.5	22634.3	25833.6	27941.4	139585	7720.73	4162.33	4549.09	5132.04	5148.5	4390.51	6311.24	5466.59	4819.84	4643.8		[M+H]+ 146.036	14	33	546	TRUE	TRUE
234	M147T346	147.065	147.063	147.076	346.404	341.293	351.007	64	64	23921	2487.28	2376.55	2059.07	2339.77	2084.78	1981.36	2166.98	2294	1995.55	2195.04	12666.4	11010.9	10456.9	1252.06	9954.46	10344.3	1104.64	1128.43	1419.28	10101.4	1535.49	10110.4	57838.9	90389	49034.3	92372.4	61613.8	105929	58673.8	99660.2	56794.1	94680		[M+H]+ 146.059	54	4	35	FALSE	FALSE
235	M147T377	147.076	147.075	147.077	376.772	364.128	401.433	140	82	109461	15389.1	17507.2	6953.21	10377.5	7365.42	18408.9	13575.3	17431	14068.4	18115.9	91349.4	69646.5	117920	79810.2	78118	82182.1	82208.6	77525.7	78683.8	74029.9	69850.7	76881.3	29355	39022	47227.7	37774.5	33797	39734.6	69865.5	38044	33160.5	35913.1	[15][M]+		34	42	278	TRUE	FALSE
236	M147T429	147.076	147.075	147.077	429.193	426.893	432.798	67	67	16489	4567.63	5746.47	3761.45	4974.1	4173.89	7778.84	4439.77	6067.27	5568.41	8235.8	23973.6	23327.6	22634.8	25228.5	20765.4	21108.8	22640.4	19782.2	19216.3	22265.1	23444	22550.7	9598.94	7781.9	5113.68	7021.6	7349.84	26843.1	9076.43	8824.88	32789.3	31131.6		[M+NH4]+ 129.042	78	32	122	TRUE	FALSE
237	M147T39	147.08	147.079	147.081	38.891	29.593	71.25	85	72	4443	5024.8	4636.81	2098.21	8984.77	3183.09	3646.24	3054.76	3709.3	6403.69	4500.4	29840.2	13253.8	15539	26261.4	20319.5	22540.3	11423.1	9818.46	8990.58	15501.6	22239.3	25859.8	13801.1	21581.7	20695.8	21750.7	12462.1	21879.1	12704.6	20148	14051.3	17079.1		[M+H-H20]+ 164.09	2	0	0	FALSE	FALSE
238	M147T173	147.08	147.079	147.081	173.317	162.919	179.328	55	55	3386	8695.72	6482.19	12493.1	13068.8	6728.52	5684.71	15152.3	5469.75	8643.12	13860.6	17211.4	11876	18031.9	22191.8	9792.82	19324.2	21117	18511	16119.8	18276	8369.44	17501.2	7541.74	3590.29	7753.53	3335.73	6135.86	22194.7	9262.19	17632.7	6434.24	16366.5		[M+H-2H2O]+ 182.095	10	0	0	FALSE	FALSE
239	M147T411	147.076	147.075	147.077	411.4	408.297	416.494	41	41	17799	6861.84	7591.97	4782.98	7301.03	5449.86	8323.91	5054.19	8716.02	6592.39	9548	21437.3	23664.1	33676.2	21735.6	22236.4	21137.3	33177.3	18544.5	24698.8	28796.6	32580.2	30530.1	9680.9	8308.58	8297.21	9488.22	8584.92	10999.2	9781.31	10671.3	10320.5	11982.9			81	25	1136	TRUE	TRUE
240	M147T526	147.112	147.111	147.113	526.235	518.165	541.414	91	79	9551	23791.7	7162.53	25440.5	19310.1	18013.3	17962.4	20959.6	14902.3	20526.4	29667.8	17501.1	8538.61	37221	26874.9	21000.9	27708.6	20542.4	19941.1	3452.27	20373	21149.3	21318	64372.1	77811	71204.7	70923.3	84147.4	80268.9	93987.1	82768.6	65169.2	73112.3		[M+NH4]+ 129.078	158	23	348	FALSE	FALSE
241	M147T167	147.116	147.116	147.117	166.579	159.657	175.61	61	57	4101	21108	18503.7	27187.1	18195.8	27193.2	21038.4	20327.6	38431.9	26815.4	19511.4	26045.6	13544.1	34639.8	28585.8	28916.9	37776	17083.4	23811.1	19006.7	35493.3	37274.8	26311.1	16794.5	20190.1	18557.7	35610.9	23108	32346.4	27569.7	24807	29934.4	32470.1			87	1	33	TRUE	FALSE
242	M147T135	147.117	147.116	147.118	134.82	124.449	149.313	45	41	4407	8764.04	8079.51	8238.47	8576.23	4571.36	8741.71	8363.73	8942.05	8539.39	8344.08	32659.5	18751.6	13221	16540.6	35101.7	21170.7	25893.5	31421.9	17250.5	13686.4	12478.3	17261.7	8437.56	8788.22	15781.5	8772.53	8510.76	9430.05	8431.3	9564.05	8973.18	9164.15			13	0	0	FALSE	FALSE
243	M148T223	148.047	148.046	148.048	222.914	201.068	228.466	85	64	13509	110.506	79.8355	249.859	106.534	403.93	107.628	279.22	108.855	183.4	140.816	34124.5	19092.1	31880.9	32522.4	32039.3	31331	23769.6	19439.7	28064.2	32009.7	31696.2	19951.6	666.776	1224.84	515.39	1005.59	727.074	849.891	738.844	1152.57	726.144	838.209	[13][M+1]+		32	0	0	FALSE	FALSE
244	M148T132	148.047	148.038	148.049	131.897	114.886	153.051	89	67	41831	3140.09	2864.5	2827.25	3668.34	3026.28	3748.98	3399.74	3466.52	2964.19	3613.57	148263	149083	170059	194496	69087.4	188709	135188	129253	168180	152585	96697	168512	4119.63	2321.28	3900.39	2547.54	3031.5	5145.56	4743.69	3862.76	4259.15	3354.28	[14][M+1]+		13	0	0	FALSE	FALSE
245	M148T368	148.042	148.041	148.048	367.771	362.331	375.785	47	47	1939	1584.65	3193.68	2115.75	1539.14	1281.92	1299.24	1077.19	1328.45	2224.43	2144.31	2270.85	1809.52	1662.44	2351.16	1545.73	1273.2	1041.94	1157.64	1057.96	1686.24	1406.28	1181.33	5491.73	3865.27	3997.2	4258.92	3149.22	5393.17	4273.57	4324.4	7260.16	5595.12			69	0	0	FALSE	FALSE
246	M148T399	148.06	148.059	148.061	398.824	377.609	414.782	89	82	78911	4556.32	4195.28	2782.03	3669.33	4290.4	3960.69	3017.04	3975.23	4415.59	4090.69	99530.4	88862.9	90085.5	93902.7	94266	98382.4	106023	97132.3	94214.1	98276	95700.6	90312.3	5663.64	6485.65	6108.37	4759.61	5632.7	6247.35	5659.05	6798.76	6447	6394.69	[16][M]+	[M+H]+ 147.054	67	62	244	FALSE	FALSE
247	M148T429	148.06	148.059	148.061	429.454	414.885	435.868	71	67	5169	1956.59	2433.66	1178.03	1982.82	2138.51	1990.32	2426.64	2421.75	1135.83	2687.01	13243.5	11876.2	11484	11526.6	11958.4	14970.8	15992.3	16954	10662.7	30668.2	14172.2	25968.8	2477.01	5567.58	5139.55	2896.71	5678.09	2840.62	2741.51	2511.12	2539.76	2990.61			78	35	101	FALSE	TRUE
248	M148T375	148.079	148.077	148.08	375.187	371.934	392.53	62	50	4049	1129.88	1026.02	947.477	899.065	1037.77	760.689	933.913	1192.58	842.67	1140.4	6099.67	4438.66	5243.12	6371.48	5827.48	5295.75	5685.74	5726.29	3837.5	6015.41	3045.99	4738.67	1190.19	2105.92	2617.28	1819.66	2387.03	2601.99	2032.74	3644.69	2351.01	3770.45	[15][M+1]+		34	0	0	FALSE	FALSE
249	M149T38	149.059	149.058	149.06	37.943	27.423	54.949	89	76	19603	4667.84	17141.9	5650.63	16517.9	1811.22	16500	9228.49	17444.2	19304.2	17400.2	78639.3	66570	77531.2	50051.3	69998.1	64323.8	79546.6	69336.7	90248.7	76347.7	75275.3	90060.5	55848.7	40553.5	29314.9	42726.2	42031	44462.8	56802.6	29636.2	28097.3	33119.4			2	8	68	TRUE	FALSE
250	M149T265	149.059	149.058	149.06	264.582	258.419	268.267	59	59	1773	5252.06	3264.77	6528.84	4406	5233.8	4260.23	4322.39	5241.1	5761.12	4175.56	3351.6	3539.11	3195.72	3817.68	2446.71	3879.7	4226.7	3216.14	2389.55	3617.55	4254.69	3282.19	7024.05	4307.3	5697.21	5616.3	8213.81	6884.59	7381.82	6787.23	7697.2	5160.16		[M+H-H20]+ 166.074	74	1	17	TRUE	TRUE
251	M149T183	149.059	149.058	149.061	182.562	171.627	199.222	64	59	3156	3808.92	5406.15	3556.34	3108.99	3599.52	5089.84	6007.97	6022.64	2569.78	7615.31	12321.6	6743.53	8774.27	8777.38	16771.4	9794.78	23225.3	11788.5	11098	21823.9	8572.78	12776.3	17678.2	14116.4	14478.1	7636.78	10752.2	10768.1	8528.44	13425.1	13923	6518.33		[M+Na]+ 126.074 [M+H]+ 148.056	29	17	76	TRUE	TRUE
252	M149T224	149.05	149.049	149.059	224.119	214.608	237.662	48	44	2392	3972.77	2427.58	3008.32	2459.02	3218.25	2517.59	2079.48	2524.85	3400.74	2884.74	1929.7	2136.32	1196.03	5264.69	1157.3	5391.84	1583.68	5030.22	4363.48	2662.22	4851.5	845.459	6988.95	7095.55	5637.71	7909.28	7696.8	8573.14	6293.82	8820.07	7597.08	8495.7	[13][M+2]+		32	3	19	FALSE	FALSE
253	M149T399	149.063	149.062	149.064	399.027	389.12	413.477	65	62	2392	782.354	723.58	824.789	772.528	858.625	609.284	797.04	631.076	854.069	752.189	3816.32	3042.02	3732.86	4100.5	4460.32	4337.24	5649.74	4622.83	3793.13	4037.61	3761.97	3964.84	816.386	755.698	854.27	796.13	887.071	703.839	770.004	750.983	900.84	634.231	[16][M+1]+		67	0	0	FALSE	FALSE
254	M149T136	149.096	149.095	149.096	135.544	126.679	153.608	88	80	19547	32884.2	28669.5	46312.4	31067.7	38696.4	29525.7	27044.2	32382.9	36079	43492.9	168361	187730	135459	159371	166033	164757	159981	157922	192492	225578	146755	151276	10435.1	21239.3	18248.5	43604.1	32937.7	41259.2	33171.3	43893	33202.8	34020.4		[M+Na]+ 126.098	13	52	70	TRUE	FALSE
255	M149T40	149.096	149.095	149.096	39.5255	29.201	51.487	72	66	19480	10040.9	8566.88	16234.1	15835.6	20664.2	13209.8	14925.2	15163.5	11600.5	11865.4	18346.7	12541.5	44876.2	19400.4	37408.9	84125.4	18285.9	81061.4	92310.2	41497.1	15829.7	46433.9	29002.8	33706.7	35989.7	33196.4	27974.4	37904.1	28267.4	39929.2	29909.9	32582.2		[M+Na]+ 126.106	2	48	70	TRUE	TRUE
256	M149T171	149.096	149.095	149.097	171.348	156.161	189.36	49	41	8670	35372.6	14861.7	19527.4	29232.5	23047.1	15264.8	21239	23574.3	38478.4	25239.8	2601.25	25487.7	9989.85	21940.9	12798.1	23904.6	24977.9	23946.7	22217.3	10628.8	45322.4	26881	20898.3	13250.8	11949.4	18238.8	9877.15	16068.4	13738.3	14125.6	13682.6	14830.7		[M+K]+ 110.135	10	57	76	TRUE	TRUE
257	M149T166	149.132	149.13	149.134	166.495	133.882	199.177	59	46	5042	9912.86	9595.19	16677.3	14609.3	21208.1	9306.91	8909.18	15862.2	18347.8	15059.6	7181.47	15810.5	24438.8	20379.3	9286.8	36689.5	11301.2	23594.5	14603.3	18439.7	25722.7	26276.5	7839.81	14373.2	9285.93	16245.3	8172.36	14987.3	8520.73	11679.4	6208.53	8715.7		[M+H]+ 148.12	87	25	94	TRUE	TRUE
258	M150T247	150.054	150.054	150.055	246.759	239.368	263.532	88	82	23404	7737.32	5513.75	7477.96	6625.21	8593.43	3774.33	6145.84	5940.97	6607.64	5638.82	94262.8	94129.2	87449.2	98685.3	118052	118646	110538	92164.4	84262.9	81216.5	97727.8	92527.5	95226.5	80078.7	102494	85284.6	101590	75103.6	112053	89073.7	119139	82707.9	[17][M]+	[M+CH3CN+Na]+ 86.0385 [M+CH3CN+H]+ 108.02	15	47	305	FALSE	FALSE
259	M150T376	150.054	150.053	150.056	376.455	367.911	381.773	68	68	1562	1015.86	799.605	1171.98	874.861	801.899	754.79	902.288	736.667	842.406	975.687	4220.3	7241.26	8382.39	9483.22	7989.4	7850.82	4886.07	8750.87	3985.97	3655.66	7805.44	4110.41	8846.92	4141.19	6170.64	3961.16	6409.98	4083.4	6443.7	4592.09	14858.4	3635.29			34	3	113	FALSE	TRUE
260	M150T289	150.057	150.054	150.059	289.37	273.837	318.73	52	42	7615	5908.41	5133.21	4801.79	4971.81	6095.52	5789.88	4146.66	5608.97	7896.98	6025.82	8448.79	7419.57	8275.77	7227.21	8405.71	6469.77	9993.79	3765.51	7519.35	7521.75	8871.89	7936.56	26954.5	25575.5	37586.8	25560.8	33734.5	26399.5	34604.9	29254.3	32289.2	28547.6		[M+3Na-2H]+ 83.1103	136	16	115	FALSE	TRUE
261	M150T393	150.055	150.054	150.065	392.6	389.643	408.999	52	50	1883	671.003	1127.64	632.258	1088.14	673.768	1032.89	1105.17	1139.05	831.627	1232.05	346.685	3499.36	3861.94	3731.19	3433.62	3582.31	296.042	3599.33	3185.79	3261.07	3235.72	2556.49	6404.57	11463.4	5804.7	5160.76	6143.3	5647.48	5582.95	5866.22	6354.74	5158.06			106	0	0	FALSE	FALSE
262	M150T135	150.099	150.098	150.101	135.446	127.622	167.87	62	56	2443	8734.52	2273.39	9678.93	8164.43	8908.59	7594.44	6900.23	7725.33	2560.74	7987.94	29151.6	16450	12577.6	10899.2	17715.3	17530.5	21897.6	5292.63	15566.3	7200.62	16147.4	6981.64	6121.58	6147.05	6701.33	6287.33	6844.61	6434.73	6232.23	6377.88	6521.4	5973.59		[M+NH4]+ 132.061	13	0	0	FALSE	FALSE
263	M151T326	150.919	150.917	150.92	325.59	323.498	329.149	59	59	1013	72.2365	0	0	44.3931	0	0	0	43.0195	100.545	0	909.155	774.657	652.958	1281.36	1481.9	1549.02	1417.16	1238.53	1375.48	1096.5	1092.96	1110.04	952.376	723.561	977.147	682.045	1183.19	672.453	1223.63	562.247	949.664	471.006			96	0	0	FALSE	FALSE
264	M151T375	151.047	151.045	151.051	374.898	371.458	407.632	58	49	4124	432.255	496.177	414.539	596.251	470.021	597.7	292.964	484.853	460.268	531.865	4433.39	4019.91	3873.8	3707.13	4289.83	4615.37	4365.28	3408.97	5124.37	4468.41	4585.27	4066.79	1571.26	642.207	1004.34	845.545	667.046	841.89	1343.49	555.256	835.252	668.184		[M+H-H20]+ 168.052	34	2	1	TRUE	FALSE
265	M151T247	151.058	151.057	151.059	246.637	239.368	250.518	72	72	2709	1769.94	1656.23	1576.24	2988.14	1657.11	1325.41	1606.17	2690.58	2082.35	1464.18	8579.14	8645.82	9119.39	10225.1	7873.85	7923.33	10312.6	8380.58	8154.77	8383.34	4820.82	9069.75	8881.05	5932.96	8762.01	6868.22	9508.68	6785.06	9751.16	7874.1	9336.51	8129.44	[17][M+1]+		15	0	0	FALSE	FALSE
266	M151T186	151.075	151.073	151.076	186.241	174.134	206.134	91	74	8694	16539.3	11139.3	12855.4	15487.5	6189.91	14906.4	17484.7	19040.6	26710.8	19817.2	21032.4	20980.9	27786.4	22961.5	18696.1	19832.5	24099.8	18325	17755.8	19361.5	27065.3	19532.7	18040.1	31749.1	15744.2	16337.8	18007.9	16254.9	17544.7	39297.8	19391.6	16722.7			123	17	46	TRUE	FALSE
267	M151T135	151.075	151.074	151.076	134.726	119.49	146.534	70	64	4443	17960.7	18198.3	13185.5	18468.3	15408.8	19419.3	18615	18285.1	16175.9	18969.3	61350.9	64297.9	29428	55873.6	65902.5	38255.1	40094.1	30832.2	14913	61068.2	34174.1	64244.4	28655.3	19426.4	22832.9	19000	25663.3	21226.8	26316.3	21330.4	28189.9	24580.9		[M+K]+ 112.119	13	8	89	TRUE	TRUE
268	M151T42	151.075	151.073	151.077	42.228	33.171	54.71	53	50	33935	24580.7	30596.2	28394.2	27397.4	24923.5	29146.3	26549.6	25509.5	24487.5	26200	13884.1	28685.5	13451.9	16296.7	16909.7	18067.1	18765.8	17049.2	4755.45	12644.3	19713.5	17983	161694	156073	255635	191593	163207	127176	170999	127947	169629	128101		[M+H]+ 150.07	7	2	117	TRUE	FALSE
269	M151T161	151.111	151.111	151.112	160.805	148.602	190.055	87	74	7670	22127.4	37279.2	5231.72	4943.72	13486.9	39132.4	42176	42314.6	19768.6	7097.77	43339	56482.4	47099.9	54917.7	26380.9	55663.3	55267.1	51949.1	41885.8	41764	41235.3	37823.9	9969.01	11283.5	12215.5	10180.4	7588.81	37644.7	7287.31	37987.9	10918.7	36435.9		[M+H]+ 150.106 [M+H-2H2O]+ 186.126	9	18	56	TRUE	FALSE
270	M151T41	151.111	151.108	151.113	40.952	34.183	57.833	60	58	4773	6627.53	3861.83	5150.26	30937	28799.9	32070	31593	8221.65	2058.33	5058.72	6236.22	7565.82	11652.5	5368.73	6091.42	18598.6	17053	17563.7	10561.5	7975.08	20731.9	20882.3	17803.2	25845.8	14234.6	26867	19312.2	14956.4	17928.5	17626.7	19845.2	24195.9		[M+H]+ 150.106	2	4	65	TRUE	TRUE
271	M151T134	151.148	151.147	151.149	134.409	125.479	145.71	82	78	4256	10764.1	10261.2	6386.44	7582.42	8504.82	6741.99	4133.73	7379.04	8816.34	8092.31	29211.4	23591.1	21186.3	28113	30230.4	29075.8	31687.6	27301.3	23064.6	23983.1	29929.3	16337.7	39142.9	2655.69	1506.98	25034.2	334.88	26483.3	35570.6	2604.35	936.876	2318.15		[M+K]+ 112.187	13	0	0	FALSE	FALSE
272	M152T258	152.001	152	152.003	257.973	247.577	262.901	81	81	2946	22407.2	18915.1	22723.3	13850.3	23713.1	22106.4	25746.4	18874.4	24038.6	17674.8	10816.3	10841.3	12342.4	7487.1	9411.17	9443.85	7437.1	8094.44	8824.85	8182.04	9763.2	12492.7	6788.59	5511	7125.29	7823.09	7699.11	7517.66	8117.95	7324.3	6106.73	9896.55		[M+CH3CN+Na]+ 87.9854 [M+CH3CN+H]+ 109.967	35	0	0	FALSE	FALSE
273	M152T415	152.018	152.015	152.02	415.239	409.159	436.886	73	67	965	1939.52	1065.97	1675.94	1816.87	872.297	1850.02	1865.9	767.285	1305.68	1980.68	2521.9	973.745	3066.62	6721.35	8416.33	5929.27	4391.3	3179.08	1608.84	2923.91	2660.63	3222.9	1567.04	2579.39	1882.32	2360.98	1531.05	1046.89	1897.57	2080.26	1399.51	1174.07		[M+Na]+ 129.033 [M+H]+ 151.015	41	0	0	FALSE	FALSE
274	M152T375	152.031	152.03	152.033	374.661	371.458	389.663	53	48	3380	190.503	387.86	377.263	292.821	245.886	323.332	269.886	297.421	277.176	211.033	4191.82	3672.74	3439.12	2332.17	3869.54	3812.79	4255.61	4140.03	4489.32	3558.44	3694.05	3748.31	694.249	247.975	1413.39	720.402	417.835	650.699	1118.09	870.429	1283.31	760.863			133	0	0	FALSE	FALSE
275	M152T231	152.056	152.055	152.058	231.348	219.104	248.962	85	82	48024	24226.3	8283.45	18593.2	8369.22	22503	9516.07	8839.9	9838.96	22388.3	9940.71	26141.6	26594.3	26504	29573	31010.6	30986.2	31947.8	28105.5	22496.6	24171.9	28635.4	27976.4	239431	118148	203757	131471	222573	149122	236372	145192	238512	162435		[M+H]+ 151.049	52	64	782	FALSE	FALSE
276	M152T267	152.056	152.056	152.057	266.762	261.092	268.342	60	60	24199	5669.57	2954.14	4225.4	2443.66	7181.34	2265.75	2580.51	3178.78	6065.89	2858.67	16637.7	15960.6	15736.4	17921.1	18329.8	19799.2	19757.4	18789.5	13210.4	16328.6	16894.1	15812.8	91365.6	75973.8	85882.7	75219.2	91866.8	86518.1	95651.2	79318.6	90435	88093.7			48	27	50	TRUE	FALSE
277	M152T136	152.07	152.056	152.071	136.278	120.08	144.621	71	64	7752	21893.1	35459.3	16088.2	35645.6	20121.8	35471	37209.7	38597.3	22856.1	35043.5	38437.7	58229.5	54644.9	25660.2	38378.9	42521.6	43806.6	41610	59639.8	48418.8	62441.2	58831.8	30694.1	30918.7	34469.5	31158.5	34696.7	30983.9	33992.7	29870.7	32583.4	28499.7			60	34	37	TRUE	TRUE
278	M152T102	152.07	152.07	152.071	102.269	90.723	108.957	42	41	8283	13334.2	17798.7	12900.2	16087.3	12992.1	16596.4	17006.2	17489.6	13112.9	16471.3	61885.4	50117.7	54779.6	55979.3	64203.3	62696.5	65850.1	56250.3	64274.3	58411.6	30580.1	50332.3	125117	115780	139910	118490	138053	117740	161412	118962	120661	83282.4		[M+H-H20]+ 169.076	73	39	37	TRUE	FALSE
279	M152T159	152.114	152.113	152.116	159.344	150.958	168.485	50	48	3062	5646.3	6812.54	5694.64	7231.02	5926.14	7592.66	7847.45	7351.25	5262.38	7485.91	5913.12	4252.29	4487.26	2319.21	4726.6	4002.86	11224.6	1481.73	12495.1	1874.68	13319.3	12555.7	15409.9	14817.1	17563.7	930.779	15815	14447	15536.9	13425.6	16898	13688			9	0	0	FALSE	FALSE
280	M153T374	153.075	153.074	153.076	374.314	364.561	380.607	73	71	1579	1318.09	194.82	1135.54	1417.3	1519.79	852.529	1284.14	1245.3	1205.82	1156.21	2061.54	3401.38	3303.08	3927.27	3834.67	2743.94	4931.58	3820.52	2182.8	4118.21	4115.07	2872.16	2381.01	2261.81	4217.75	5569.31	3940.61	5203.95	4654.28	5220.27	4476.98	5833.5			133	0	0	FALSE	FALSE
281	M153T39	153.09	153.089	153.091	38.8595	28.713	56.749	44	42	2598	3146.58	3745	4004.4	8336.8	5700.62	3756.58	8468.85	5292.75	2619.98	5742.78	3884.08	5614.74	7834.89	2438.52	8679.97	5024.35	3811.31	7496.52	9717.17	10219.9	10488	10555.7	12843.9	20919.4	11896.7	12610.5	16219.9	17511.2	14467.3	13732.2	16242.5	18256.9		[M+H]+ 152.084	2	0	0	FALSE	FALSE
282	M155T283	154.976	154.974	154.978	283.224	272.13	294.002	44	41	933	2865.97	3280.69	1345.12	2136.85	3794.2	3059.25	1015.36	1308.06	2013.02	2537.85	1025.53	2812.05	1172.2	537.66	1489.29	2803.79	1862.92	2226.57	2234.01	3307.94	2371.53	2679.03	1955.1	1215.31	1226.13	2539.25	1775.36	2503.94	1784.77	3099.58	1460.81	2293.22			126	0	0	FALSE	FALSE
283	M155T381	155.042	155.04	155.043	381.286	377.811	401.122	51	46	915	1023.48	1365.91	807.732	1378.28	698.781	1434.78	1060.81	1221.27	761.906	1314.28	2340.64	2108.77	1371.08	1815.25	1707.85	2978.41	2722.47	2470.66	2088.93	1381.2	1872.07	1191.41	3874.75	2459.91	4564.1	2920.46	4329.86	2696.79	4858.47	2675.38	4297.39	2586.57		[M+Na]+ 132.05	80	0	0	FALSE	FALSE
284	M155T76	155.07	155.069	155.07	76.311	59.866	92.758	62	57	4187	11415	3805.87	10116	16871.1	11408.8	7626.87	12168	5651.48	4926.38	16224.4	12838.5	20752	20642.7	25718.9	25656.1	13011.1	22138.5	31307.2	31708.4	12455.8	37424.1	39541	9770.09	12040.9	10628.5	13085.8	10779.9	12082.7	9898.43	12823.7	10808	10988.1			58	6	45	TRUE	FALSE
285	M155T175	155.07	155.069	155.071	174.591	168.996	192.161	59	52	5041	4265.05	10823.7	3816.12	6621.28	4967.71	5198.53	4881.77	4964.14	8834.47	11762.2	13012.8	11936.1	19094.6	18886.4	17811.5	19548	8872.4	11892.8	11223.8	18216.1	20239.3	18402.6	40415.6	33548.6	45505.6	36718.4	41545.7	34476	42300.1	33898.3	52354.3	33189.7		[M+H-2H2O]+ 190.084	42	10	80	TRUE	FALSE
286	M155T207	155.07	155.069	155.071	207.34	203.687	210.778	57	57	16758	576.537	711.358	423.619	1001.4	545.637	449.729	598.812	1292.16	747.036	1026.27	12328	3267.28	12450.6	10807.5	12488.4	6880.9	14277.2	10933.8	10204.7	11084	12358	11680.7	3956.95	2461.58	2934.99	2523.8	3386.37	3432.06	3569.68	3139.73	4005.98	3211.01			107	11	81	TRUE	FALSE
287	M155T35	155.085	155.083	155.09	34.563	29.685	53.282	58	52	9227	10940.5	14186.2	11117.5	14303.8	9139.4	13180.7	15502.4	15162.7	9372.83	14110.2	9467.89	5670.86	12304.1	5969.52	10509.6	7594.66	7190.87	5709.13	3047.26	11569.3	5581.64	9489.76	5752.66	3023.7	4284.88	5714.71	7671.69	13910.3	8538.56	1597.88	6489.14	4338.07		[M+H]+ 154.07	4	0	0	FALSE	FALSE
288	M156T272	156.042	156.041	156.043	271.677	267.752	273.147	78	78	1449	2161.12	1319.99	1020.71	1240.14	1434.99	1414.53	1153.73	1708.52	1823.43	1234.15	1101.36	1340.09	1920.73	1187.24	910.89	1095.1	1201.79	1275.25	1455.48	1146.88	1337.66	1749.88	977.985	778.708	606.972	603.1	604.556	705.588	802.816	993.083	927.84	752.842		[M+K]+ 117.079	99	1	2	FALSE	FALSE
289	M156T445	156.076	156.074	156.077	444.979	434.189	463.021	50	42	2864	5833.19	23444.2	3396.99	63877.5	7013.23	1751.15	20216.9	22084.9	13489.6	82328.1	20453.9	19826.3	12737.9	16263.5	37839.3	22427.3	24039.4	31164.1	21730.7	56542.3	21582.3	20112.3	20586.3	32967.1	14982.6	33503.9	40779.1	15085.2	20141.6	3453.31	36599.6	28866.1		[M+Na]+ 133.086	91	14	13	FALSE	TRUE
290	M156T210	156.101	156.1	156.103	210.325	196.183	215.485	59	59	1066	905.973	695.814	466.26	835.826	448.433	905.537	1137.65	1525.34	627.694	714.319	1477.46	1316	1598.69	1844.6	2053.39	1923.77	2532.84	2106.26	949.956	1266.01	1699.57	1358.78	1624.85	1594.13	1312.84	1379.65	1344.7	2006.45	1606.57	1906.08	1446.98	1956.12			56	0	0	FALSE	FALSE
291	M156T39	156.138	156.135	156.141	38.864	31.184	48.358	49	48	3417	9079.91	13189.7	22696.5	13830.1	12773.3	13982.9	12574	9281.48	10406.7	10928.6	3557.72	5011.08	1199.92	3093.71	2036.33	4771.45	4791.69	2723.74	3425.27	3959.12	3930.61	1727.23	8042.17	10311.9	11076.9	10815.1	7940.11	10748.2	9681.69	10718.9	9562.02	7973.86		[M+NH4]+ 138.109	2	0	0	FALSE	FALSE
292	M157T171	156.983	156.982	156.985	171.099	162.362	177.356	75	73	2050	7314.55	8025.58	8269.93	5334.11	9546.13	3877.63	8397.94	5905.1	8932.99	5706.09	5424.85	5283.26	6206.94	5036.62	4505.61	4759.97	3675.15	4170.28	7688.2	5661.43	6562.75	3721.76	6356.85	1690.18	4533.35	3658.89	3243.67	3203.1	2554.83	2584	2292.54	1759.41		[M+CH3CN+Na]+ 92.9673 [M+CH3CN+H]+ 114.949	10	0	0	FALSE	FALSE
293	M157T343	157.049	157.046	157.05	343.049	339.029	350.893	47	46	669	1063.75	1195.31	1396.98	1168.09	1322.77	1264.65	1186.71	1552.18	1409.02	1064.51	771.765	709.378	1369.53	1069.38	1346.09	778.796	1447.86	892.211	1426.08	713.387	1387.97	792.513	689.969	560.603	459.63	699.317	578.1	618.567	493.972	538.356	497.404	602.083			25	0	0	FALSE	FALSE
294	M157T35	157.101	157.099	157.104	34.9475	28.273	57.955	80	70	3417	3153.72	2758.66	4960.88	4749.71	2322.29	3887.33	4300.44	1271.52	1992.29	2750.51	17800.1	11991.3	15109.6	18720.7	10034.7	19705.1	13560.8	8506.66	12497.8	17463	11942.7	15381.7	11883.2	4727.82	10742.8	11196.6	10649.4	22140	10061.1	20812.3	19154.5	21048.6		[M+H-2H2O]+ 192.12	1	0	0	FALSE	FALSE
295	M157T516	157.108	157.107	157.109	515.933	510.736	557.441	65	45	2413	3279.24	4513.88	2536.35	5720.24	3554.01	5832.12	7515.1	9575.52	3623.35	4140.43	5191.67	11824.9	2665.59	5610.48	5327.29	6575.99	4870.68	12629.5	9762.96	3839.19	990.804	8266.37	4249.07	4030.3	3200.44	3274.75	3027.93	4188.2	5722.96	4290.65	2632.19	1865.24			19	0	0	FALSE	FALSE
296	M158T110	158.081	158.079	158.081	109.722	105.751	115.832	60	60	2050	9956.19	8354.13	8877.1	8679.18	6200.8	8239.97	7053.03	7442.97	9554.81	4456.21	3251.76	5605.12	5314.6	7683.98	5844.18	6088.66	6573.91	6136.27	6118.31	4614.69	5129.94	5166.96	5122.46	5270.02	5873.12	5550.41	7664.44	3643.05	5765.11	3552.79	7074	3551.72			134	1	27	FALSE	FALSE
297	M158T516	158.092	158.089	158.092	515.882	510.526	530.247	94	70	5038	15313	16649.3	2893.35	27886.7	11005	7937.2	25859.3	10817.5	5220.36	9988.86	20315.3	8449.79	27259	33505.2	19473	36897.3	7503.18	22827	12009.1	4104.37	18963.4	30453.7	18974.5	10360.8	13169.6	12836.1	14768.6	11127.2	13527.2	11329.2	7484.22	9403.8		[M+H]+ 157.084	19	2	51	FALSE	TRUE
298	M158T553	158.092	158.091	158.093	552.548	531.517	578.685	150	57	2464	3766.11	2988.9	1717.64	5506.34	5715.29	4626.87	3912.58	2424.86	4671.12	3756.59	12423	3785.07	613.305	4074.5	4181.33	3423.72	7783.45	2097.53	6429.82	2446.09	7727.94	2347.84	1406.36	2977.23	6059.36	2859.12	2894.35	2346.1	2111.02	2348.95	2077.66	4987.52			184	6	29	TRUE	TRUE
299	M158T591	158.092	158.091	158.092	591.079	579.143	601.533	67	43	1315	2634.25	2108.29	2447.57	3216.2	2616.24	3197.03	3344.67	2243.2	2117.56	3189.62	374.508	10345.7	2984.49	8907.41	2884.59	9198.25	2231.03	2430.32	3564.13	1527.89	3120.62	7649.6	2654.04	2274.89	5829.94	3433.77	10544	1709.93	5062.47	4524.27	2453.03	1584.52		[M+H]+ 157.084	44	6	29	TRUE	TRUE
300	M159T247	159.065	159.063	159.066	246.89	241.091	251.271	69	69	4784	10166.4	11679.3	7676.07	11639.5	10099	8403.49	10009.8	12775.5	11157	10196.5	13883.2	14197.9	13855.4	10565.5	13512.2	17370.9	17833.3	15342.9	13182.5	13446.7	16476.3	13302.4	12841.7	9681.47	11354	9403.27	11991.6	8296.35	12485.1	8634.89	12026.3	9804.47		[M+H-2H2O]+ 194.08	15	4	55	TRUE	TRUE
301	M159T34	159.08	159.076	159.082	33.708	29.245	56.72	73	70	4101	2196.07	9053.98	10563.5	8481	10027.1	4102.2	8421.53	9767.64	9393.8	3039.06	21431.1	18902.5	20600.1	12410.6	11634	18970.5	23972.6	13300.4	17255.6	12941.8	23198.7	26298.5	9921.6	11069.2	8722.07	9763.33	20647.3	16605.3	11999.8	13997	10176.6	5058.61		[M+Na]+ 136.092	4	0	0	FALSE	FALSE
302	M159T35	159.116	159.115	159.118	34.923	29.666	49.731	57	56	4101	7105.29	4371.51	11338.8	9155.01	7126.89	11238.7	4010.35	4188.12	7731.52	3780.84	26672.4	18785.9	11715.4	15040.5	23231.8	12583.7	7425.3	7284.78	8257.93	9491.51	1219.41	26560.2	30185	21114.7	15720.4	33834.7	34713.5	28629.7	25327	35621.4	30217.1	10852.6		[M+H-H20]+ 176.124	1	1	33	TRUE	TRUE
303	M159T173	159.116	159.115	159.117	173.068	162.784	188.85	49	43	2734	12004.4	11049.8	9006.78	11337.8	11063.4	19891.4	21988.3	21064.1	18573.3	12686.5	14007.9	12880	10794.6	14223.3	12902.3	13065.5	10830.4	12992.9	12225.8	14259.1	12129.5	10255.5	14104.2	13623.1	12356.7	13551.4	12498.6	13785.6	6107.8	12933.6	12113.6	11060.7		[M+H]+ 158.113	10	3	34	TRUE	FALSE
304	M160T147	160.06	160.051	160.061	146.954	116.973	181.564	57	45	1749	18324.8	16454.1	615.195	16939.8	32441.6	19341.6	19675.4	18420.7	17264.3	18847.5	12403.4	3386.4	5235.27	917.983	8688.43	6471.7	4831.88	8471.41	10770.4	4893.86	10773.7	12139.4	14329.1	17091.6	14372.2	12401.5	13312.6	9538.38	10691.8	27252.3	4208.35	8236.29			24	2	10	TRUE	TRUE
305	M160T40	160.075	160.074	160.083	40.4085	26.529	63.096	48	44	2863	2824.33	2500.74	3749.64	1701.62	2504.64	2053.07	1981.77	2255.55	3278.31	2038.78	2677.57	2474.69	2824.82	3278.74	1874.41	2625.48	4258.77	1761.54	2058.04	3444.07	4710.31	4373.57	9257.57	5266.91	10279.6	9341.5	8872.05	5447.96	10517.2	5800.02	9008.62	8186.24		[M+Na]+ 137.087	2	0	0	FALSE	FALSE
306	M160T309	160.096	160.095	160.098	308.56	304.324	320.768	76	72	1709	7478.63	4266.37	2230.27	4591.72	6488.53	8928.14	7330.84	8420.84	11436.1	5740.2	2534.81	3849.1	2433.34	3158.39	3210.48	3638.01	3492.84	2413.19	2337.96	3336.48	2585.69	2980.34	750.407	534.187	710.228	1014.59	877.882	537.692	888.385	473.222	946.722	758.616			104	0	0	FALSE	FALSE
307	M160T384	160.133	160.13	160.134	383.533	374.171	388.597	42	42	431	932.267	484.551	993.683	636.706	1098.76	718.582	584.131	674.03	921.494	597.802	530.28	469.892	559.929	715.212	568.025	517.401	674.54	519.554	528.488	632.465	593.441	402.79	698.03	839.35	1100.83	1034.05	750.88	1230.57	866.408	1146.92	875.795	837.93			208	0	0	FALSE	FALSE
308	M161T357	160.901	160.899	160.902	356.717	341.803	368.219	86	75	1363	892.611	741.57	905.435	1487.43	859.547	2413.76	1354.46	841.437	818.311	854.114	3873.89	4763.99	4337.62	2703.75	2137.91	2857.93	3191.4	4350.59	2817.33	2462.06	4825.46	3051.44	6103.63	3744.48	6548.39	5574.51	6524.79	5824.96	7816.35	5644.4	6193.7	2832.11			97	0	0	FALSE	FALSE
309	M161T183	161.059	161.058	161.06	182.526	179.369	200.898	83	79	4103	25990.9	26021.5	12907.2	12676.4	13011.4	27299.6	15954.3	14748.5	22827.5	15741.4	22403.5	13800.7	12444.4	16576.2	15920.8	16004.9	28216.4	21916.5	19167	13947.3	1790.28	25597.6	39221	17195.4	27924.5	21349.8	42673.9	17059	37612.2	19157.1	24843	17287.6		[M+3Na-2H]+ 94.1033 [M+H-H20]+ 178.065	29	0	0	FALSE	FALSE
310	M161T40	161.095	161.094	161.097	40.022	29.245	52.339	79	75	4762	23005.8	5515.7	4364.72	21819.4	2245.4	5361.61	23977.4	21874.5	5179.05	22345.6	29926.8	17303.2	79258.2	26656	17287	29824	42678.5	21390.3	33177.2	44022.1	17193.9	33404	14629.2	29716.2	25808.2	21564.6	25439.4	26895	20410.8	31030.7	26543.3	14012.7		[M+Na]+ 138.109	2	0	0	FALSE	FALSE
311	M161T322	161.092	161.09	161.096	321.661	314.649	325.114	41	41	2492	1690.33	1325.96	1380.66	1175.55	1403.76	1396.47	1455.97	1200.6	1820.14	1598.96	1453.29	1192.32	1531.73	1029.61	1201.83	1280.52	984.57	1323.24	1530.38	1270.43	1335.86	1490.79	7460.76	4402.17	4146.25	5711.81	5048.61	5963.11	6750.08	5903.09	5690.54	5484.08		[M+CH3COO+2H]+ 100.057	5	0	0	FALSE	FALSE
312	M161T154	161.096	161.094	161.097	154.255	136.588	198.285	63	46	13977	52320.7	49383.7	48745.7	49269.4	49443.7	55399.4	49826.5	59228	5820.1	4344.78	56584.4	6503.02	10515.3	61300.6	58658.4	8851.4	62246.6	57351.8	55387.7	6775.39	12087.2	55059.4	6836.64	8867.33	5529.89	12599.6	6771.08	11364.7	5407.77	8106.24	5476.11	13304.2		[M+H]+ 160.096	65	0	0	FALSE	FALSE
313	M161T531	161.128	161.127	161.129	531.083	498.064	548.994	110	79	2575	2845.97	6622.44	3271.68	7468.43	6960.99	6013.41	6284.62	7746.37	6089.51	5513.35	1596.11	4379.7	5138.47	4907.11	4206.24	4867.55	4119.05	4075.42	4384.73	4175.74	4196.83	4363.36	12048.1	9855.37	12640.4	8881.07	14743.2	10126.5	13042.3	9699.37	9430.56	10488		[M+NH4]+ 143.094	169	5	61	FALSE	FALSE
314	M161T159	161.132	161.131	161.133	158.635	152.389	174.307	84	74	13977	68429.3	63166.4	61525	60801.7	61782.3	122334	60912.1	74641.8	116854	79044.4	93894.1	207438	87532	100388	86126.8	111803	100224	81068.1	91872.8	96295.8	87687.3	96710.2	11508.8	10060.2	26125.7	19043.6	24455.7	15915.2	5431.45	10693.9	7444.78	14661.8			46	56	71	TRUE	FALSE
315	M161T134	161.132	161.131	161.132	133.982	123.44	138.256	56	56	9383	9617.04	17910.8	27133.1	22381.9	24492.9	20364.3	24090.4	27833.6	26414.9	20451.7	85069.8	78282.9	57037.1	83898.6	93047.6	85256.2	88743.4	84445.5	8112.72	75728.5	82281.4	71897.2	21682.7	13595.6	19002.6	15104.6	19225.6	13252.3	9813.37	16102.7	21951.7	16605.7		[M+CH3COO+2H]+ 100.097 [M+H-H20]+ 178.138	13	37	63	TRUE	FALSE
316	M162T389	161.994	161.993	161.997	388.878	378.851	392.674	49	49	489	944.253	525.081	806.693	783.02	599.734	965.397	748.666	722.368	414.064	504.275	656.565	692.325	485.684	774.572	883.98	731.64	647.738	564.8	695.59	749.941	887.55	844.926	644.304	686.678	983.712	453.123	827.926	434.916	776.93	652.983	468.129	539.981		[M+K]+ 123.031	64	0	0	FALSE	FALSE
317	M162T490	162.076	162.075	162.077	490.493	472.381	504.057	80	78	744	1605	1912.82	1400.5	1856.18	3003.6	1905.15	532.73	1631.83	1163.34	1616.74	1272.16	879.666	1037.32	1719.46	1360.86	1466.21	1269.48	1278.76	1276.62	1401.91	1339.9	1292.01	629.628	743.589	687.903	579.445	572.426	614.035	859.423	533.272	507.055	581.761			191	1	14	FALSE	FALSE
318	M162T300	162.075	162.073	162.077	300.246	290.366	315.9	63	58	1550	8002.54	10731.7	9658.66	11647.2	9648.61	11106.1	9153.09	2368.45	8625.13	8832.11	8174.22	2169.89	8622.27	5475.22	8213.41	8120.25	7440.05	8451.83	4291.56	7367.21	8517.59	7582.85	2933.74	10724.9	16117.9	11921.2	4989.93	3235.12	5372.79	5186.58	2599.89	1973.57		[M+H-2H2O]+ 197.091	23	1	47	TRUE	TRUE
319	M162T33	162.091	162.089	162.098	32.714	29.245	64.782	49	44	4289	2548.22	2171.33	2836.07	2102.37	3106	2083.51	2400.26	2296.61	1598.22	1920.71	7322.48	5414.27	5318.73	3983.39	3436.78	9466.83	6700.84	4122.93	6695.13	6078.59	4426.68	8413.07	8997.57	6751.98	7775.06	2226.81	11099.8	2516.92	11370.5	7373.16	1819.07	5796.04			3	0	0	FALSE	FALSE
320	M162T352	162.112	162.111	162.113	352.312	337.587	359.298	97	81	6679	21594.9	15096	21433.4	16812.3	21930.8	15341.5	14287.4	14510.5	21899.7	14173.6	11879.7	16876.2	13394.5	15902.7	12265	13997	10979.9	10180.1	11724.4	11463	12081.9	14265.4	5732.08	11962	3683.19	11443.4	4737.14	11786.7	5993.9	13351.2	6181.01	12092.2	[18][M]+		147	23	16	FALSE	FALSE
321	M162T417	162.112	162.111	162.113	416.941	413.249	429.682	66	64	3801	944.207	962.795	595.013	722.224	737.759	1084.64	1035.47	867.934	648.236	777.771	4043.45	3782.18	3310.78	4341.94	4171.92	3613.85	3342.73	3483.15	4288.66	4018.35	3459.43	3644.61	2445.32	1390.92	867.761	1730.59	1620.1	1387.21	1572.24	1208.18	1861.67	1452.06			22	14	8	FALSE	FALSE
322	M162T132	162.135	162.126	162.136	131.984	117.61	138.423	48	42	5391	35740.5	25515.3	24140.2	31591.8	24120.5	35457.1	34987.2	38937.5	31381.9	42325	4992.14	4555.02	8396.83	9907.72	11651.2	7991.6	12182.9	12172.9	10720.1	11486.2	11878.7	4266.94	3545.78	2946.41	4065.62	3153.9	4178.54	3353.82	4049.49	2860.25	3546.75	2986.31		[M+CH3COO+2H]+ 101.108	13	5	199	TRUE	FALSE
323	M162T159	162.135	162.134	162.136	158.758	152.065	170.103	69	68	2293	15759.4	10473.9	14281.9	14459.2	8739.76	15154.3	14273.1	15056.7	12752.8	8248.72	12692.3	11913.1	12159.2	6797.76	6152.07	9245.24	12020.5	25519.6	25014.2	15580.5	14879.7	12155	6780.21	5876.12	8431.38	6097.5	7344.09	5959.71	8357.27	873.828	7476.07	6374.99			46	5	199	TRUE	TRUE
324	M163T254	163.06	163.059	163.06	254.456	243.716	259.49	82	82	3314	30864.8	32541.5	25266.4	35335.7	28331.2	35986.4	28512.7	33730.3	30361.4	38948.3	21368.8	19480.2	18452	24771.2	28474.5	23399.5	22697.3	23476	23428.2	19327.9	21982.9	19829.6	17757.7	25416.3	24080.7	34656.4	20425.3	20905.9	20867.8	30078.2	25227.1	26378.5		[M+H]+ 162.055	70	7	13	FALSE	FALSE
325	M163T196	163.075	163.074	163.076	196.167	174.536	208.063	109	81	11552	80447.5	46265.8	59339.9	62105	56720	51196.2	49490.4	84621.2	82246.6	127240	79144.5	42607.5	45891.8	42387.3	76101.4	45069.6	47508.1	40520.8	62254.3	67600.4	68364.8	46290.8	154944	25544.1	33761.8	28413.2	42719.8	30323.2	49223.6	29532.2	52903.4	28513.9			18	47	78	TRUE	FALSE
326	M163T45	163.075	163.074	163.077	44.62	30.66	80.221	111	73	48850	35257.6	31980.2	38180.7	31540.4	26626	32107.1	32040.8	37016.3	33143.9	32236	23662.3	81196.6	14887.6	29055	14117	30245.3	104778	61743.6	19552.4	13259	16091.3	21948.5	227471	194414	262809	241169	268322	247901	271679	221953	264065	190059			12	18	104	TRUE	FALSE
327	M163T148	163.075	163.074	163.076	148.035	141.223	153.828	57	56	14306	17991.8	17985.2	16921.4	15629.6	16608.7	17963.2	16559.8	20023.1	18912.1	19629.7	35820.4	37781	27272.3	43353.7	35803	38903.7	42173.8	32684.1	31376.2	32496	33313	31511.3	48569	98958.4	109033	107940	107246	116257	61561.6	116790	122187	74488.2		[M+CH3CN+Na]+ 99.0645 [M+CH3CN+H]+ 121.046	24	36	104	TRUE	TRUE
328	M163T163	163.075	163.074	163.075	162.649	159.943	174.346	53	49	6862	25471.6	26617.7	22732	25029.6	40450.5	30117.2	27265.3	31319.7	24319.8	29472	33959.7	29524.5	33164.3	30486.2	33531.8	32013.1	33176	30413.9	24676.2	35411.6	32419.7	33408.1	19785.3	25481.3	22479.1	25658.5	21280	26250.4	19865.9	26088.8	21694	23955.9			9	28	67	TRUE	FALSE
329	M163T353	163.115	163.113	163.117	352.69	339.507	355.157	62	61	743	1489.84	979.176	1826.49	1051.05	2022.17	1315.31	1876.31	1881.84	1185.77	1405.84	1510.84	1283.8	1707.95	1707.91	1191.67	1611.85	969.928	788.754	686.787	1276.69	1049.97	1220.71	2474.51	3239.41	3291.04	2723.24	3345.74	918.404	515.028	1148.83	2918.05	1516.41	[18][M+1]+		147	0	0	FALSE	FALSE
330	M163T136	163.111	163.11	163.112	135.6	124.98	141.213	68	65	14520	13096	22428.5	14214.1	12958	12434.7	23858	21410	12436.6	22804.3	23365.2	95527.1	90085.2	76382.5	68359.3	87871.1	73404	64902.7	68136.6	102717	83804.7	97695.7	57982.7	82032.7	71590.2	71699.9	70987.2	80046.2	78008.6	79938.4	84312	80043.1	86945.6		[M+H]+ 162.108	13	18	276	TRUE	FALSE
331	M163T195	163.147	163.146	163.148	194.742	181.771	206.292	52	47	10237	49661.8	36274.8	37751	38839.6	39889.5	49278.4	39310.5	42062.7	47633.6	50367.1	47838.8	46139.9	8036.23	7935	48086.6	13692.5	10463.2	14463.2	43018.2	43123.3	48608.7	14913.2	45657.4	21817.8	43258.8	23345.3	48120.7	11717.5	217.096	10871.7	48275.5	11026.2			18	0	0	FALSE	FALSE
332	M163T165	163.148	163.143	163.149	164.617	154.487	180.866	80	66	6862	10528.8	19022	27599.8	10426.6	14285.7	28083	11590.3	22039.3	20994.6	19676.7	33386.2	17671.7	15968.6	35716.9	60783.5	19358.4	20657.1	20065.5	33783.7	17509.4	31969.3	30913.1	11490.8	51999.8	8726.09	51550.1	10495.8	10885.7	14066.2	52076.7	14069.8	49146.6			9	2	59	TRUE	TRUE
333	M164T358	164.029	164.027	164.03	357.541	355.762	359.805	43	43	1532	188.229	120.782	250.465	318.302	150.193	262.702	350.903	489.378	339.428	273.809	1351.44	1337.98	1523.24	1335.28	2005.64	1960.07	1782.32	1777.09	2030.74	1867.89	1649.75	1195.97	7045.53	2405.86	9774.08	2129.84	8570.9	2042.06	7949.16	1806.71	6734.45	1510.03		[M+CH3CN+H]+ 121.996	97	0	0	FALSE	FALSE
334	M164T197	164.078	164.072	164.079	197.497	178.689	222.623	53	45	2422	22502.7	24509	7044.21	21594.1	7405.94	3794.93	4029.12	4559.37	4194.65	3707.47	6885.54	9337.29	6796.2	10192	6807.65	4661.3	8253.8	4296.96	6893.44	2154.8	7801.56	4416.46	6203.48	5314.78	3235.51	5443.04	7334.44	1974.48	7144.33	2647.57	6944.49	2184.88			30	1	25	FALSE	TRUE
335	M164T306	164.091	164.09	164.092	305.616	301.077	314.765	78	78	762740	3.13859e+06	3.59215e+06	2.8957e+06	3.93589e+06	3.13531e+06	4.10485e+06	4.42488e+06	4.33693e+06	3.27948e+06	4.12752e+06	1.75746e+06	1.67018e+06	1.71642e+06	1.67936e+06	1.55575e+06	1.59346e+06	1.62897e+06	1.59617e+06	1.39754e+06	1.59455e+06	1.55674e+06	1.74613e+06	3548.81	5896.35	2360.23	5400.78	2644.93	6506.57	3088.07	6181.41	3029.86	5107.31			6	24	1962	TRUE	FALSE
336	M164T33	164.107	164.105	164.107	33.2115	28.482	44.841	84	82	141115	23997.9	14661.7	25237.3	14893.3	22139.2	15759.3	16318.3	17417.4	29794.8	15893.2	290130	287451	305961	293070	301820	332552	306323	307099	324532	351936	359728	385181	18383.1	38621.5	15683.7	46035.3	18198.1	44005.3	17722.5	47096.9	17315.4	40874.8			3	23	309	TRUE	FALSE
337	M165T184	165.051	165.047	165.052	183.501	172.526	193.46	62	56	8437	29048.4	73961.6	79269.4	34897	112135	34275.1	74333.3	30062.8	46340.9	25680.5	22768.5	35171.9	35149.8	119882	164024	157482	60028.8	56178.5	40482.4	36289	59071.5	37595.4	25323	45252.9	44068.7	37286.7	46301.3	33044.5	28879.1	27822.6	23645.6	32058.2		[M+Na]+ 142.067	29	46	156	TRUE	FALSE
338	M165T284	165.05	165.05	165.051	284.394	269.205	290.412	64	54	6323	25503.5	43445.4	26252.2	26496.5	39778.9	30344.2	30044.7	29218.9	22715.9	27507.4	13826.4	26716.4	53827	51920.4	72882.7	63302.9	51091.4	53385.7	35557.7	29781.9	14649.4	20319.6	23460.4	28766.8	27040.6	26305.3	30771	23025.6	23760.7	25778.5	22711.1	21888.2		[M+Na]+ 142.063	126	60	17	FALSE	FALSE
339	M165T131	165.054	165.052	165.055	131.367	111.596	142.707	58	47	26318	24807.1	30702.4	43870.4	27291.3	40169.4	33283.4	28023.6	26049.6	31955.2	25001	89143.9	24888.8	83201.3	106882	106194	63779.6	91347.8	147441	43371.4	43063.1	86620.9	32678.6	26001	29844.1	25272.7	27593.1	28655.9	24037	25488.3	25688.8	23831.9	24432.3		[M+K]+ 126.098	13	56	114	TRUE	TRUE
340	M165T39	165.069	165.068	165.072	38.5285	29.593	53.742	50	47	10594	18238.1	19921.4	19993.8	18935.2	17900.2	18580.9	18929.6	19837.4	19946.5	20645.2	5624.69	10480.9	37741.9	7093.81	6689.74	4036.37	1690.29	875.258	10816.7	11384.4	8374.18	4120.52	1251.15	4452.76	43885.5	44180	2552.38	3698.11	4221.64	4902.83	44715.7	4806.51		[M+K]+ 126.106	2	4	286	TRUE	TRUE
341	M165T154	165.09	165.09	165.091	153.961	144.024	159.455	61	59	9569	46925.6	70774.7	44634.5	47071.3	46298.7	63291.6	48416.1	59854.6	82661.5	76738.7	44101.1	38636.8	34858.8	40919.2	44963.4	32825.5	52937.8	30765.5	38749.3	30508.2	33646.1	37504.6	47498.1	55982.1	51712.6	59575.3	42517.1	67419.9	43649.5	70846.6	42113.2	63494.8		[M+Na]+ 142.105 [M+H]+ 164.087	65	46	417	TRUE	FALSE
342	M165T199	165.09	165.09	165.095	199.471	193.774	207.139	67	67	5103	10755.8	16319.2	17898.3	13368.9	20165.5	942.692	11921.9	10448.6	18321.4	11246.4	17950.5	17451.2	22527	18383	17866.4	17583.3	23836.3	17366.1	15176.4	14055.2	17235	18873.5	14047.8	15926.4	20466.8	54528.2	24521.9	21858	20448.8	37016.6	20173.9	42563.1		[M+K]+ 126.123 [M+H]+ 164.091 [M+H-H20]+ 182.097	30	37	61	TRUE	TRUE
343	M165T125	165.09	165.089	165.091	125.182	108.427	138.798	78	66	22974	16419.6	20551.4	5105.42	18030.7	24978.3	22361.9	17876.2	17200.7	21602.5	17269	86359.5	77115.8	73045.2	73928.1	49657.5	82397.6	81695.6	53533.3	74226.2	75984.7	82880.5	49113.7	18657.2	21182.1	19436.7	20950.3	20702.3	18576.7	351.712	22596.2	20929	19036.6			13	36	90	TRUE	FALSE
344	M165T41	165.09	165.088	165.092	40.8425	28.656	56.749	66	64	10594	10141.8	14882.8	12815.4	13870.4	12986.7	13849.6	11454.8	15733.8	14183.2	14863.5	11875	4513.4	10979.3	27126.8	29963.3	10872.1	14255	20708.6	16414.3	14413.3	46056.1	27153.4	48710	65844.2	58857.8	60331.2	38389.2	50086	58958.4	34967.9	43184.9	50023.2		[M+H]+ 164.09	2	19	286	TRUE	TRUE
345	M165T174	165.09	165.089	165.091	173.74	165.216	187.116	72	62	6835	25331.7	21198	24296.4	19921.2	20727.2	24588	23198.7	20756.1	25423.8	18328.5	18655	17711.6	18396.8	19328.4	19042.6	19550.5	25205.2	16954.7	24114.6	20470.4	29392.1	19296.6	13644.8	26413.6	19585.9	17957.1	18520.5	18796.7	20735	19719.5	36169.7	19061.1		[M+H-H20]+ 182.095	10	30	101	TRUE	TRUE
346	M165T313	165.093	165.087	165.095	313.137	302.469	322.621	58	56	41772	129852	168170	140350	166452	146712	175024	186953	188660	138152	181632	71831.8	65900	69585.2	76472.6	74831.9	73280.8	76055.7	66127.5	56577.2	66356.8	65283.5	73412.3	19717.1	1324.17	1571.24	21836.8	22748	21874.8	19260.1	23681.4	20133.8	21591.5		[M+H-2H2O]+ 200.107	66	0	0	FALSE	FALSE
347	M165T34	165.11	165.109	165.113	33.7725	16.142	55.895	74	65	11619	16075.4	17655.8	17513	16847.1	15419.8	15754.5	16296.8	17840.9	17297.9	18574	30937.5	31666.2	30909.5	33723.2	26880.8	37012.7	24393.6	25898.9	36643.9	34842	42176.8	38628.1	5796.58	37474.1	37887.1	37650.8	37959.8	5165.27	41104.2	39438.9	39065.4	7070.88		[M+K]+ 126.146 [M+H-H20]+ 182.125	4	1	18	TRUE	TRUE
348	M165T134	165.127	165.126	165.128	134.053	113.01	141.875	84	65	6998	35135.7	13442.5	54256.5	35423.2	47737.9	6346.97	36195.8	39205.7	42017.3	7088.82	50106.2	41694.2	39283.8	75123.5	74772.7	51073	50947.6	49939.7	55072.5	45264.8	32168.1	48421.1	33026.5	41007.4	33026.1	36123.8	36517.1	36247.4	33235.3	36135.1	32084.3	33151.2		[M+CH3CN+Na]+ 101.108	13	12	104	TRUE	FALSE
349	M166T648	165.99	165.989	165.991	647.549	635.143	669.823	68	41	294	691.026	1831.84	828.75	3654.75	227.014	778.028	1157.26	1125.82	717.838	136.703	699.264	732.113	658.76	1478.08	927.095	185.643	936.403	943.968	176.689	172.911	643.868	91.176	613.204	4696.25	731.217	1079.44	87.78	701.453	593.517	942.786	753.963	953.534			143	0	0	FALSE	FALSE
350	M166T2	165.99	165.989	165.995	1.9705	1.112	12.747	56	45	768	762.545	1241.06	1502.55	892.65	695.365	728.522	851.527	893.287	1419.22	967.424	630.633	919.343	1121.9	1456.04	1874.59	1399.42	1918.58	1977.18	1741.55	731.724	908.682	989.162	745.11	1061.51	910.853	1047.93	1071.73	826.639	1123.24	717.461	989.668	956.953			189	0	0	FALSE	FALSE
351	M166T22	165.99	165.99	165.991	21.825	13.227	26.808	47	44	408	1234.37	1633.77	1650.27	1256.85	1208	1235.48	1186.75	1143.43	1400.13	1236.36	997.446	1190.52	1319.89	2505.23	2195.05	1853.74	1248.81	1570.2	1665.34	419.363	1284.24	909.861	1241.14	2043.32	1480.69	1468.62	1187.87	1199.26	1265.57	1223.1	1086.86	1287.01			115	0	0	FALSE	FALSE
352	M166T370	166.052	166.05	166.056	369.813	367.248	390.166	46	45	2062	2543.69	3657.69	1845.13	2732.66	3768.22	2771.54	3671.33	2740.18	4022.77	4211.9	3796.43	2943.18	4319.8	6449.23	4892.11	8393.01	4495.94	5292.99	4146.16	2907.95	1105.23	2928.58	9808.16	10089	12183	10550.1	10326.2	11347	10798.2	9762.31	9781.97	9351.97			33	2	13	FALSE	FALSE
353	M166T162	166.072	166.068	166.073	162.225	159.655	171.093	82	80	2695	12605.9	10463.1	8177.88	9507.5	10018.5	5658.08	5931.76	8925.68	18092.5	5303.61	7873.49	3327.63	3780.62	4543.03	7662.96	6211.76	6020.32	5171.78	6895.85	6277.42	5790.58	6826.95	9331.74	7716.58	8745.15	5715.24	5757.94	3768.69	13667.6	10142.1	13928.4	2992.59			9	0	0	FALSE	FALSE
354	M166T267	166.085	166.083	166.086	267.122	257.737	280.107	84	82	109980	63961	46858.8	52126.4	47227.7	52877.2	54281.8	53190.6	50198.8	57907.6	62480.5	68864.4	49478.2	67217.5	65698.2	69325.3	71410.5	79378.9	59938.8	55335.2	18374.7	66929.6	64507.7	460072	305890	391447	302271	456954	353158	477704	375468	494954	385102		[M+H]+ 165.079	48	57	495	TRUE	FALSE
355	M166T652	166.097	166.096	166.097	651.736	635.206	669.451	135	76	1565	5042.34	47764.6	7158.83	8979.09	9389.68	8905.62	7441.21	6385.37	13611.2	6503.51	945.777	5095.85	6627.96	725.329	25024.5	6754.82	6126.04	5365.46	9570.61	15797.8	11082.8	42597.2	4614.06	5728.67	8752.95	14799.7	11890	15071.3	8516.08	3195.73	10071	6151.49			143	8	16	FALSE	TRUE
356	M166T21	166.097	166.096	166.098	20.813	18.237	25.456	59	59	1706	16878.9	18955.7	20304	18783.7	18819.4	19370.6	18553.3	18107.7	17922.4	17693.5	10280.2	20143.5	19411	22637.2	16814	18487.9	18957.8	20175.8	24483.3	14625.8	21068.5	19489.5	15801.2	19390.8	19797.7	19512.2	18445.6	19003.7	19188.1	17638	17845.6	17712.4			115	2	40	TRUE	TRUE
357	M166T3	166.097	166.096	166.097	3.277	0.922	10.91	44	43	2773	12821.7	13567.5	15291.2	13706.7	13735.6	14094.3	13978.3	13401.5	13478.8	12699.6	13296.9	11336.8	3729.37	14464.8	13736	14700.1	15805.7	13270.8	15149.7	19178.5	14094.3	13880.4	11347.9	14223.2	13986.6	13911.8	5800.72	10797.6	13167.8	13517	12473	12333.4			182	2	44	FALSE	FALSE
358	M166T707	166.097	166.096	166.097	706.782	680.356	719.331	115	64	1479	6240.2	7191.17	6655.63	6708.49	6653.84	9284.97	7849.53	6396.74	3030.35	7431.31	4824.39	7918.12	12926.3	6402.17	6779.29	9758.62	984.06	24666.4	7727.97	712.698	22852.8	5318.42	1122.23	7999.62	6495.8	6331.03	6510.78	10979.4	5972.13	9383.51	5605.09	2877.62			192	7	16	FALSE	FALSE
359	M166T64	166.122	166.121	166.13	63.788	48.124	70.196	63	63	3773	14475.3	16313.5	16483.7	16276.8	14987.2	15763.8	15870.3	15100.3	16258.6	14182.5	11734.2	12252.7	9542.48	13396	16195.8	15671.2	17168.3	14513.2	17653.6	13079.8	14695.6	13143.1	10297.5	1761.7	11389.5	11656.6	11938.8	11929.1	11171.9	10966	11520.8	9414.61			77	1	25	TRUE	FALSE
360	M166T136	166.13	166.128	166.131	135.841	111.319	143.654	45	43	2442	10473.7	10454.4	11229.5	10492.6	10606.1	10506.4	10364.8	10700.6	9981.52	10583.9	2832.77	11766.5	13828.2	2486.92	2924.64	6441.7	7347.44	3608.37	6295.22	15358	4613.59	13885.3	7177.82	8512.33	8489.84	8673.31	8448.18	7666.97	7881.12	7255.83	7426.27	7490.07			60	1	25	TRUE	TRUE
361	M167T173	167.07	167.069	167.071	173.277	162.947	185.334	47	42	2432	11378.2	8076.3	10682.8	9105.32	11498.6	6446.59	10045.7	9946.15	10974.5	10230	9084.78	1164.71	12067.8	11482.9	7757.92	8732.48	12449.7	13023.4	1163.94	14028.4	7275.4	13667.8	16624.9	12617.8	17345.3	26802.7	25462.6	12942.9	16897.6	32510.5	15283.2	12140.2			10	25	66	TRUE	TRUE
362	M167T265	167.089	167.086	167.09	265.332	257.737	278.684	81	78	8050	4015.25	3406.05	4620.77	3123.83	5049.08	4619.05	4473.33	4016.22	4941.59	5655.46	5054.45	4803.2	3344.14	4855.29	5713.15	5400.67	5971.55	4393.5	3814.31	5305.7	3585.5	4704.74	27440.4	18418.7	24736.2	17299.5	26794.1	19553.2	26220	22710.2	28153.5	22357.2		[M+H]+ 166.074	74	0	0	FALSE	FALSE
363	M167T110	167.106	167.105	167.107	110.309	104.844	127.187	43	42	4986	16309	17350.2	15869.9	16241.8	14760	16141.2	16894.9	16839.8	15957.3	16518.7	36072.5	46071.3	23973.6	37523.7	35557.3	30416	38891.8	22411.7	49592.1	6358	51145.9	35982.7	17575	24793.2	19157.7	27373.9	19300.7	27292.9	20167.6	27924.1	18575.9	24596.2			134	34	271	TRUE	FALSE
364	M167T69	167.154	167.152	167.156	69.33	58.5	76.7	65	62	10051	112828	125554	126062	148195	130504	150968	105979	148318	109992	126623	21535.2	17319	9816.79	13552.9	19437.6	22814.6	17950.9	10916.7	19568.5	18097.4	18981.3	15582.3	2539.17	2630.48	3323.81	4084.11	2534.15	5173.44	1776.39	5057.16	1906.06	4589.6			77	9	61	TRUE	FALSE
365	M168T452	168.028	168.027	168.031	451.701	445.581	461.697	41	41	683	1175.67	915.894	762.293	569.402	881.127	1048.16	841.873	895.167	1362.37	959.168	762.301	676.892	986.465	1070.12	832.022	1029.71	1478.82	1248.52	783.936	784.897	1089.84	936.424	33.7816	222.679	159.051	215.11	162.498	181.267	207.226	209.687	186.898	86.9259			16	0	0	FALSE	FALSE
366	M168T21	168.076	168.076	168.077	20.7405	12.375	24.043	62	58	890	6785.14	5959.16	7703.68	7289.97	7338.42	7705.8	7402.97	7259.11	7148.27	6751.6	7190.04	4693.86	9198.44	7315.59	6894.56	7658.19	7594.32	8121.34	6686.43	8061.58	6818.25	7250.92	6653.2	7255	7404.58	7888.05	7264.9	7495.2	7372.37	6765.56	6981.29	7008.77			115	2	8	FALSE	TRUE
367	M168T2	168.076	168.076	168.077	2.129	0.792	11.379	69	60	2080	6743.61	3662.42	3647.08	3438.44	2249	4019.42	3946.37	3981.05	3872.95	3590.36	3826.85	2890.14	1795.37	2423.86	4302.09	5970.52	6018.42	4479.83	3920.68	3622.39	7992.86	4514.93	3720.49	4137.83	4278.4	4968.19	4597.18	7596.96	4244.21	4670.56	3724.32	3728.25			189	3	23	FALSE	FALSE
368	M168T655	168.076	168.076	168.077	654.815	624.762	672.744	71	46	874	2319.53	2297.5	4634.01	2599.91	3299.67	2870.89	2731.61	3497.07	2108.4	2341.79	2353.25	2373.53	2167.21	2646.7	2680.87	1826.04	2373.29	2443.51	2579.37	2843.82	2619.5	2756.03	2417.69	5516.68	2882.34	2694.87	1816.1	2692.72	3735.34	2040.86	1473.93	2246.93			202	1	8	FALSE	TRUE
369	M168T169	168.138	168.136	168.139	169.032	161.816	174.308	52	45	8262	82417.4	39292.6	85545.6	43745.8	87586.3	58543.7	62084.9	62631.2	88643.1	61443.4	6997.86	14012.4	7386.81	11784.6	16144.5	6888.44	15739.2	11646	11701.7	12792.5	9487.8	9844.75	7088.7	2346.58	2687.23	3616.09	1443.04	3705.92	8058.89	3488.94	7498.35	6626.63			82	9	52	TRUE	FALSE
370	M169T375	169.058	169.056	169.059	375.432	362.76	406.735	105	75	14208	1393.8	1265.07	1484.78	1306.38	929.707	859.207	1103.5	1212.85	911.873	1134.45	12751.9	13143.9	12057	12299.2	12679.2	16318	15409.9	15307.2	13087.8	11907.3	14043.8	13406.1	5434.34	4789.76	7042.11	4358.9	23340.7	5360.76	6007.61	5042.97	7226.66	5119.38		[M+H]+ 168.052	34	9	1	TRUE	FALSE
371	M169T35	169.1	169.098	169.102	34.775	28.713	43.991	63	61	3417	7877.44	8832.39	994.954	7763.12	1497.06	7542.05	7268.7	7241.88	8015.76	7088.69	17175.7	10133.9	21187.9	11789	11349.5	18961.5	20015.9	15817.3	12005.7	16924.7	14863.3	22335.2	2823.68	6867.13	13217.8	3313.82	12865.1	9105.04	3286.64	6968.8	12181	6407.12		[M+Na]+ 146.103 [M+H]+ 168.085 [M+H-H20]+ 186.107	1	0	0	FALSE	FALSE
372	M170T396	170.043	170.041	170.045	396.005	390.191	403.982	74	73	869	1624.26	1033.59	1219.08	951.453	1279.18	1298.07	1239.49	1570.41	1613.26	1087.66	1361.48	1139	1407.09	1099.01	1929.04	1224	1421.55	1639.61	1372.63	1560.22	946.139	1686.18	827.57	602.773	913.006	726.302	914.363	891.49	1189.33	944.489	1139.4	502.152			130	0	0	FALSE	FALSE
373	M170T104	170.081	170.08	170.081	104.115	90.768	120.983	77	72	55750	13783.2	17589.2	15927.9	17186.8	14353.8	9926.38	4013.67	16757.3	14306.6	15964.8	366963	337122	315186	418137	482151	428928	429470	402420	423480	457179	417000	370169	1.03708e+06	963196	1.1267e+06	909209	1.12728e+06	973040	1.12379e+06	943307	1.01729e+06	866263		[M+H]+ 169.076	73	56	220	FALSE	FALSE
374	M171T36	171.079	171.078	171.081	36.2265	29.651	56.204	58	55	5126	6638.65	5798.27	6262.54	4468.19	1040.93	5155.57	6078.44	4511.19	6599.68	5321.39	9915.86	6527.03	6162.68	4818.64	8863.93	4690.66	4680.46	4341.15	5898.25	5551.72	28651.8	12332.3	2496.14	4059.77	10073.1	14778.4	11179.3	1951.39	12061	6047.5	11176.5	3369.41			1	0	0	FALSE	FALSE
375	M171T376	171.112	171.111	171.113	375.846	367.068	392.572	83	82	2130	5190.86	3613.15	5163.9	3624.04	4619.36	4617.18	4027.38	4379.4	5157.7	4124.13	5002.54	4454.47	3946.01	4026.82	4640.22	4974.32	4555.72	4943.73	3841.7	4450.63	4740.1	4191.86	4720.51	4689.98	4876.35	5468.9	4912.52	5012.7	4137.24	5299.83	5193.04	5875.33		[M+H-2H2O]+ 206.127	34	0	0	FALSE	FALSE
376	M171T34	171.116	171.114	171.117	34.144	27.572	59.61	89	71	5126	5467.89	4623.08	5096.96	1070.67	2495.75	4287.8	2319.58	3880.9	4694.2	2839.98	38391.5	25636.3	22954.5	13457.3	22938.2	30334.8	19470.6	14746.8	14131.8	14301.8	15074.3	35777.3	10397.1	20784	8830.71	20569.3	7446.91	19056.4	14974.8	18480.3	12286.5	19444.7		[M+2Na-H]+ 126.146	4	0	0	FALSE	FALSE
377	M171T171	171.116	171.115	171.119	171.048	154	185.355	49	42	2212	6676.37	2838.85	6921.48	3592.41	4556.68	6450.85	2982.41	4046.84	6245.36	4462.85	11612.9	12478.1	10907.2	10675.3	11239.1	10909.8	12766.4	12817.5	8682.16	6131.67	11652.5	12233.3	2044.63	5143.6	2343.15	7927.18	1761.2	6525.06	5366.36	8218.04	3683.97	8006.89			10	0	0	FALSE	FALSE
378	M171T115	171.149	171.147	171.151	114.929	109.298	122.634	85	82	1709	12808.9	13742.6	13894.5	13798	13116.5	14092.9	12065.4	12535.8	12957.9	11997.7	6152.24	5849.05	4794.3	9401.62	6691.28	6973.96	7306.62	5192.55	8181.71	5676.21	8622.65	5489.12	7860.4	6946.9	10251.9	9123.88	8500.81	8209.13	10273.8	8150.42	9185.06	7716.96		[M+K]+ 132.189	134	9	51	FALSE	FALSE
379	M172T190	172.039	172.037	172.041	189.823	180.029	192.362	48	48	2960	3884.85	1770.14	2146.65	1381.7	1919.26	2273.16	1957.18	2142.33	2904.2	1827.22	2156.76	1866.82	1818.34	1422.76	1671.28	1342.28	2251.19	1836.47	1010.78	1533.33	1806.43	1829.89	5747.43	5122.17	3460.91	6783.6	4213.93	5428.99	3975.18	6959.09	5224.57	5785.3		[M+3Na-2H]+ 105.083 [M+H-H20]+ 189.044	40	0	0	FALSE	FALSE
380	M172T198	172.075	172.073	172.076	198.423	187.345	202.93	48	48	1709	1363.24	1131.19	1291.1	1299.38	746.04	1318.73	1214.23	1636.95	1031.93	1222.37	2633.88	3014.74	3061.11	1803.68	2890.52	3231.7	3225.96	2003.66	2398.39	2087.85	3692.76	2470.43	1053.2	818.798	1043.5	840.01	1094.54	984.828	973.362	939.398	944.372	779.19		[M+CH3CN+Na]+ 108.059 [M+CH3CN+H]+ 130.041	30	0	0	FALSE	FALSE
381	M172T161	172.075	172.074	172.087	161.422	154	167.766	46	45	1298	1142.11	2109.13	394.23	3152.42	2336.17	1550.4	3360.41	2036.65	3089.83	1342.73	4443.72	3703.93	4404.01	4009.43	3876.36	4266.35	4029.12	2214.06	2395.07	3686.17	2795.6	2715.13	3373.54	2977.74	3694.16	2975.37	2769.45	2905.92	3422.76	2811.79	2749.05	2844.59		[M+CH3CN+H]+ 130.041	9	0	0	FALSE	FALSE
382	M172T229	172.096	172.095	172.098	229.12	222.209	232.416	59	59	630	365.373	496.307	264.983	467.461	542.049	652.973	448.268	578.418	383.369	442.059	1086.46	1067.38	1014.83	1027.69	1041.27	926.624	1174.71	1009.23	819.495	778.921	1046.18	702.767	977.054	1471.05	950.239	1906.06	1105.4	1854.68	955.161	2060.28	1300.44	1849.98			149	0	0	FALSE	FALSE
383	M173T415	172.975	172.974	172.977	415.105	405.129	443.538	89	81	1367	1983.7	3846.5	925.514	4195.22	2761.21	3266.49	7185.61	5057.5	2806.88	2938.45	5787.37	3828.45	2129.71	5968.57	4165.1	3390.03	5475.27	4965.59	8145.59	3922.34	3815.36	3845.34	5216.83	4118.66	4783.88	5479.19	4865.71	6352.71	4650.23	4361.35	3657.62	4525.1			41	0	0	FALSE	FALSE
384	M173T3	173.084	173.084	173.085	2.979	0.943	13.501	59	53	1709	5832.96	7724.64	7880.25	6948.76	6185.66	5634.65	5845.02	6191.87	6047.66	5757.45	6250.47	5975.85	2738.93	5672.47	9289.59	4396.13	10645	5282.7	8905.2	9219.34	5050.62	3940.99	6150.7	7525.61	10214.2	6606.39	6083.66	6342.71	6189.84	6738.5	5496.45	6044.66			182	1	22	FALSE	FALSE
385	M173T38	173.095	173.087	173.097	38.072	29.349	54.375	55	54	4784	11848.1	1283.27	13075.6	11340.1	11231	10148.7	10483	10949.5	1179.93	11094	15061.6	12639.8	28836.5	11559.4	25480.4	16605.4	24775.4	23478.9	19159.9	10668	24926.2	14006.4	27429.5	12587.6	8604.04	11996.1	5647.68	8794.09	8712.9	10357	2023.54	8223		[M+Na]+ 150.106	2	0	0	FALSE	FALSE
386	M173T161	173.132	173.131	173.133	161.384	142.243	198.027	99	82	14984	30800.5	25260.7	27069.9	30771.5	32151.6	27607.3	17278.1	37375.2	27441.1	8367.67	109417	111297	94118	115112	114509	120862	111529	134680	84071.3	86398.7	105178	87973.1	19805.3	51377.1	16342.5	15180.1	17228.8	10365	10571.7	29507.6	18789.1	28534.8		[M+Na]+ 150.135	9	56	77	TRUE	FALSE
387	M173T39	173.132	173.129	173.133	39.495	30.704	50.647	51	48	4784	2744.13	13663.1	4164.64	12587.7	4436.04	11332	934.894	5257.34	3128.24	12165.9	19558.5	13904.6	14400	25174.1	5141.4	28166.8	25533	24822	23977.4	26421	25470	5367.37	37100.4	25016	39933.3	27008.2	40240.4	37558.8	27039.7	29068	39569.6	25604			2	2	67	TRUE	TRUE
388	M174T231	174.038	174.037	174.04	231.282	219.211	235.132	68	68	2861	2861.91	530.663	2494.27	677.005	2116.76	298.148	485.602	510.378	2917.38	591.691	4481.39	5276.97	4617.86	5493.3	5776.87	5222.86	5524.56	4686.93	4637.46	4993.22	6228.16	5137.8	8683.76	7047.5	12718.5	7699.95	11386	7175.55	9911.28	6562.37	10573.6	6261.28		[M+Na]+ 151.049	52	7	2	FALSE	FALSE
389	M174T429	174.087	174.085	174.094	428.974	426.663	451.206	48	45	2004	4136.23	9361.22	1184.74	9617.94	1055.74	9748.98	13725.2	8698.25	455.121	12854	5073.27	5252.04	5589.14	3672.82	4074.86	4672.65	4700.46	4530.09	5446.59	3793.24	4357.52	5368.98	747.267	1334.87	3228.31	2902.42	4128.13	2744.62	2960.53	1495.14	2580.91	637.642		[M+H]+ 173.073	78	9	13	FALSE	FALSE
390	M174T161	174.135	174.13	174.136	161.382	151.315	181.226	81	79	2554	2774.37	10765.3	2734.56	1516.71	3615.36	2903.61	11876.1	2233.43	690.859	799.837	14523.3	8381.48	15815.9	12974.7	18316.2	8503.64	19901.8	15328.7	10744.9	7618.29	13936.5	12888.6	3126.05	5019.68	1315.8	3176.07	3402.9	1913.26	2737.65	2322.1	2123.41	5595.9		[M+3Na-2H]+ 107.175 [M+CH3CN+Na]+ 110.115 [M+2Na-H]+ 129.158 [M+CH3CN+H]+ 132.097	9	0	0	FALSE	FALSE
391	M174T106	174.185	174.184	174.185	106.285	100.542	131.233	87	82	5376	26229	18506.9	24108	16939.9	21116.7	17912.4	18313.3	19591.2	24638.6	18336.2	20422.9	18055.5	18423.3	23619.6	23229.8	22652.5	19777.2	18549.9	21683.5	20540.9	22333.4	17169.3	8537.85	13240.6	8087.02	12645.5	9739.82	11941.7	9638.02	10989.5	3183.4	10149.4			73	48	31	TRUE	FALSE
392	M175T93_1	175.045	175.043	175.047	93.4365	89.532	101.46	58	57	804	2891.37	6299.3	6352.21	3523.99	6149.96	3888.22	5473.19	1828.38	3997.17	3413.14	1401.52	1940.2	2329.84	7543.51	6161.54	4353.01	4226.94	3420.85	3594.72	2755.96	1971.8	1876.11	1934.18	2372.44	2833.92	3337	5232.52	3499.14	3019.09	2237.9	1949.38	2099.62		[M+Na]+ 152.057	102	0	0	FALSE	FALSE
393	M175T166	175.075	175.074	175.076	165.822	160.614	175.022	73	72	4894	19635.4	21620.6	27118.2	12216.7	19296.3	24346.6	13909.4	13444.1	14645.2	22334.5	33057.3	34121.5	33276.8	27992.5	38225.6	32961.8	49679.6	50514.7	30212.9	38836.6	44303	34461.1	15013	18064.3	17714.4	11161.1	17850.1	19065.1	17952	18679.8	18876.4	17131.8		[M+H-H20]+ 192.082 [M+H-2H2O]+ 210.089	87	16	61	TRUE	FALSE
394	M175T198	175.075	175.074	175.076	197.545	183.195	208.712	67	63	6359	9542.8	12656.6	7728.5	10303.7	8677.23	14997.3	13092.2	12563.6	12213.4	13481.1	14670.3	22901.6	14932.6	23182	15291.3	15395.8	20991.9	17261	14131.3	13932.1	16009.8	15487.7	7497.58	8197.11	6449.83	8098.12	7114.62	9830.75	8658.9	8154.96	13381.2	8721.67			30	11	63	TRUE	TRUE
395	M175T39	175.075	175.073	175.076	39.084	29.245	54.982	83	73	15179	22096.9	18112	14700.6	11697.4	12133.9	13363.7	12829.1	16489.7	13148.2	15983.5	15129.7	12080.9	14754.1	23233.6	25928.2	71262.9	24530	18554.9	24940.7	29048.5	15120.2	75966	152048	106129	156599	132826	159087	71223.1	111667	81934	100240	123352		[M+Na]+ 152.084	2	6	66	TRUE	FALSE
396	M175T35	175.111	175.107	175.118	35.2765	14.553	63.853	76	66	4101	9441.06	15564.2	7457.3	5352.76	5294.05	4882.52	6504.59	5124.91	10404.7	6429.14	12871.8	10361	17094.4	26864.6	22977.8	27417	17669.7	7113.69	16056.6	24950.2	26945.4	16636.1	20391	24239.2	19213.7	5521.82	13070.3	20626	25588	28220.9	19995.2	23625.6		[M+H-H20]+ 192.12	1	0	0	FALSE	FALSE
397	M175T555	175.118	175.118	175.119	554.965	535.093	578.801	251	76	143957	287810	346576	163843	260378	325652	367848	377978	266719	189142	380351	281474	281366	200813	490416	420424	404425	1.64678e+06	331884	613788	267639	315312	437705	254248	285580	219760	361109	631490	86584.8	658264	248912	392840	526578			36	63	964	TRUE	TRUE
398	M175T591	175.118	175.118	175.119	591.009	579.44	613.321	104	82	119843	192662	2.46962e+06	562829	1.18552e+06	839495	462297	1.36394e+06	1.1739e+06	178905	1.99741e+06	159946	517270	1.41516e+06	867938	1.38522e+06	999247	1.25526e+06	517368	984238	941120	1.19965e+06	1.49502e+06	2.03394e+06	638363	1.07686e+06	813293	955797	755618	1.21509e+06	512356	1.15134e+06	866086	[19][M]+	[M+NH4]+ 157.084	44	60	964	TRUE	TRUE
399	M175T515	175.118	175.118	175.119	515.139	504.022	524.069	79	74	379856	1.95907e+06	1.57416e+06	1.0105e+06	3.01291e+06	868258	1.71824e+06	1.97835e+06	2.32152e+06	1.46314e+06	1.84225e+06	1.6877e+06	2.14215e+06	2.7606e+06	2.36828e+06	2.14041e+06	2.11927e+06	2.1435e+06	2.81423e+06	1.56907e+06	1.79012e+06	2.58215e+06	3.45128e+06	1.587e+06	1.34643e+06	1.2569e+06	1.21982e+06	2.32771e+06	1.1792e+06	1.42376e+06	1.27173e+06	2.19083e+06	1.11309e+06	[20][M]+	[M+NH4]+ 157.084	19	64	964	TRUE	FALSE
400	M175T530	175.118	175.117	175.119	529.747	524.855	534.925	54	44	245735	583530	1.25696e+06	332873	747217	490703	728425	1.00923e+06	636715	597964	631009	926816	827964	827185	701468	787406	550147	653711	759788	2.58388e+06	674971	760707	924318	657632	37966	590588	642703	587696	765502	689005	573130	639277	80862.9			26	42	964	TRUE	TRUE
401	M175T412	175.118	175.118	175.119	411.828	395.481	425.764	109	70	11619	87923.7	155993	14410.3	57622	59101.8	104842	76982.8	64745.7	79584.5	83762.7	22573.7	148009	34464	19446.1	33914.2	31235.4	86091	20525.4	88724.9	34757	10680.4	116336	54132.6	4353.93	31595.1	9461.78	32811.1	9352.88	49401.2	5176.65	36683	6264.43		[M+H-H20]+ 192.13	81	56	788	TRUE	TRUE
402	M175T304	175.118	175.117	175.119	303.54	296.671	327.818	63	57	4101	23589.8	24590.3	7830.4	16260.5	25421.1	18909.7	19242.2	24242.9	23263.8	21435.4	2110.33	18753.2	11476.4	3506.47	13061.5	10751.2	13365	12724.8	40632.9	8863.39	5392.65	23082.5	14774.8	5385.85	20218.1	3435.09	19382.7	8049.46	12954.9	8510.29	20184.9	7252.58		[M+NH4]+ 157.09	23	31	21	FALSE	TRUE
403	M175T446	175.118	175.118	175.119	446.364	432.69	465.801	91	65	16842	128188	251826	31468.1	253283	88373.6	292209	215898	310347	132888	280065	35809.8	175241	68656.6	25051.7	82936.5	63587.8	78410.6	122025	198748	46582.7	20243.1	96960.1	21828.2	8504.57	19279.6	7256.09	43225.3	15130.6	27258.6	8786.77	37577.4	13172.6		[M+CH3CN+H]+ 133.086	91	55	1639	TRUE	TRUE
404	M175T482	175.118	175.118	175.119	482.364	468.267	501.149	78	57	36081	352107	205760	44384	337630	763281	294573	269231	216692	207248	213676	29142.1	728860	119056	23217.1	154010	155844	351599	175433	1.20811e+06	62492.9	28512.7	244873	11141.9	19660.8	24480.9	15905.4	76485.7	19846.3	64918	24032.5	85670.9	16972			105	53	964	TRUE	TRUE
405	M175T194	175.148	175.147	175.148	193.707	183.402	199.975	69	59	5545	18897.1	17480.8	12937.5	17153.6	15211.7	19881.6	19074.1	20481.6	17428.8	18554.5	13241.9	24279.4	21954	12707	21696.9	30002.7	8159.18	29035.2	15983.9	23925.1	25664.9	51623.2	13767.8	19782.3	17726.5	21641.9	13437.8	18744.9	16726.7	30207.2	13528.6	27490.4			18	17	66	TRUE	TRUE
406	M175T93_2	175.147	175.147	175.148	93.0845	87.557	103.124	62	57	8200	10649.5	13204.3	11994.1	12556.2	9825.5	12956	11899.5	12120.8	11047.2	12286.2	55429.8	50921.2	64514.8	63579.9	56502.2	50968.4	55217.7	45855.2	81808	52011.1	73536.7	57547.9	33648.1	29309.6	30542.5	6100.62	31195.7	29841.8	30406	27440.5	33954.9	28207.1		[M+H-2H2O]+ 210.163	102	42	85	TRUE	FALSE
407	M175T173	175.148	175.147	175.148	173.051	158.539	182.747	55	52	6040	5064.38	24211	24121.2	5589.33	24808.8	11162	9451.53	16073.8	25240.1	14052.6	15657.2	22393.3	15362	17589.4	28105.9	24740.3	31456.7	27352.9	13110.3	55261.9	27489.7	27604.7	8587.31	23615.8	16403.6	47241.3	9085.29	47955.4	20257.2	11874.5	27231.5	19160.2		[M+H-H20]+ 192.153	10	28	85	TRUE	TRUE
408	M175T107	175.188	175.186	175.191	106.906	100.542	111.289	46	46	3152	2336.74	2335.54	2207.31	686.664	2243.24	2010.36	2534.22	2257.63	2253.02	2265.96	2158.12	2226.63	1983.29	2238.08	2140.59	2494.24	2299.33	2300.8	2581.02	1925.83	2280	2138.46	727.06	990.28	1702.5	689.575	635.785	1243.52	1044.74	1223.19	1187.28	581.149			134	0	0	FALSE	FALSE
409	M176T166	176.078	176.076	176.079	165.619	159.943	174.634	47	47	11352	50100.6	79685.3	49607.4	77791	48394.9	82501.4	75453.8	85657.6	55673.9	82230.7	3840.9	3470.6	743.453	5130.8	5740.72	2695.45	2362.99	6049.53	2327.58	4950.17	2256	5558.13	1698.62	3054.33	2406.54	2234.56	2094.54	744.621	2449.26	2658.15	1841.67	2483.76			87	8	62	TRUE	FALSE
410	M176T392	176.091	176.09	176.092	392.036	382.37	397.494	82	82	5088	15779	19793.2	14944.9	20242.9	16044.8	21269.9	21229.8	22637.5	18103.3	21784.1	7430.58	7159.41	7112.39	7954.33	8165.29	7306.39	8226.99	7438.65	6930.2	7125.69	7459.4	6911.43	7928.42	11143.8	9169.44	11433	9774.05	12634.2	8599.87	11011.9	8316.34	10512.1			106	14	24	TRUE	FALSE
411	M176T516	176.122	176.121	176.122	515.939	511.465	529.056	89	75	22787	53618.8	61903.9	44847.6	114456	67677.3	87819.6	86954.3	112093	145168	110140	106179	73485.3	95435.2	136431	144989	112623	99444.2	102752	123005	121414	85092	92759.6	111573	69367.2	71482.1	52023.3	70828.6	52482	61330.8	49720.3	93861.2	85712.2	[20][M+1]+		19	0	0	FALSE	FALSE
412	M176T548	176.122	176.121	176.122	547.934	529.382	572.131	128	52	8582	16358.4	29401.7	9738.47	24534.2	9569.13	21627.9	17519.2	29239.2	16718.3	25957	20641	29486.1	13796.1	19671.2	39371.7	19376.1	26323.3	18485.9	30221.4	15390.6	28732.6	29965.6	16526.2	32065.6	13207.7	10276.4	27992.4	16745.6	15931.3	5252.86	15884.5	12973.3			161	0	0	FALSE	FALSE
413	M176T590	176.121	176.121	176.122	589.994	575.6	598.202	62	42	5111	38722.7	51578.2	19456.7	50414.2	36152.3	46650.4	50061.9	50054.7	37910	49106.6	7919.2	48310.9	59309.1	7284.99	50021.3	33776.8	48184.9	43906.8	57327.9	31876.3	41173.5	51941.9	47982.8	35437.1	42180.2	22864.3	33847	39529.8	36162.1	27822.1	9009.6	34057	[19][M+1]+		44	0	0	FALSE	FALSE
414	M177T332	176.875	176.874	176.876	332.177	330.152	351.643	86	82	39802	114431	101563	107503	112882	105285	112308	104921	115811	112996	115157	272144	289496	286765	258535	228403	229557	262071	237285	248336	257598	265644	247337	367035	256685	301918	273941	326278	290846	356359	294972	356573	323932			89	0	0	FALSE	FALSE
415	M177T346	176.934	176.933	176.935	346.217	343.453	366.436	75	74	11724	21394.7	1024.01	18265.2	15474.8	465.167	960.749	22288.8	18173	14694.4	1404.45	4660.03	3975.92	4429.76	4249.43	4160.72	4225.85	5172.88	4117.03	4121.39	4348.56	4599.01	3827.13	1499.72	1046.07	2054.19	1428.89	1641.91	36174.5	2311.76	41482.6	1644.05	1140.07		[M+H]+ 175.927	54	0	0	FALSE	FALSE
416	M177T351	177.039	177.038	177.04	350.688	346.653	354.137	61	61	1289	709.609	1206.28	1366.43	1472.1	1198.58	1745.67	1246.97	1147.32	1176.56	1482.3	1007.52	1242.54	1166.55	1292.17	1503.07	1657.74	1112.2	1418.5	1260.33	1141.19	1390.48	1403.88	1575.01	2022.99	2208.89	1699.4	1541.76	1542.96	2173.66	1479.54	2108.19	1589.87		[M+H]+ 176.031	79	0	0	FALSE	FALSE
417	M177T323	177.054	177.052	177.056	322.759	310.513	325.77	81	78	2932	2290.05	2607.42	2753.3	2615.3	1531.95	5392.82	6035.69	7245.44	1275.3	5178.73	2441.56	3091.67	3000.42	2495.5	2982.11	3759.58	3381.94	2793.26	2745.84	2656.41	3638.91	4231.67	4047.68	1385.98	1918.47	1113.7	2120.61	1655.87	1570.55	1732.73	2315.68	3731.75			45	8	11	FALSE	FALSE
418	M177T395	177.054	177.052	177.058	395.023	384.68	416.415	76	62	1242	3042.21	3861.74	3139.08	3285.19	3084.47	3089.04	3176.12	3446.56	3199.09	3497.3	2430.48	5368.17	2255.49	2576.51	2451.92	2871.03	2254.94	2000.94	2439.74	3855.42	631.755	3329.04	1226.77	1483.87	1900.64	1671.83	1584.86	1559.09	1401.99	1381.2	1325.25	1204.84			130	6	32	FALSE	FALSE
419	M177T212	177.054	177.053	177.056	211.849	198.605	218.027	49	49	27005	195271	3882.45	214958	5177.34	221029	240893	199707	244519	203823	1980.45	5773.25	6099.87	4939.37	5988.75	6275.08	7852.66	6589.36	5772.61	4425.08	4972.2	5935.66	5388.15	15015	6462.53	14973.3	4357.83	15768.6	8535.67	9040.56	8194.81	8632.14	4868.86			56	6	27	TRUE	FALSE
420	M177T247	177.075	177.073	177.077	247.379	233.103	261.978	47	47	4140	14876.2	16305.4	13690.2	18543.2	13828.9	13291.1	15610.1	19903	15997.8	15854.4	7003.92	4957.82	6551.03	6306.45	8384.84	7509	41490.9	7975.28	5417.3	8391.7	5865.6	5810.35	1630.41	2518.69	2743.65	2263.34	3507.11	2578.74	2285.28	2399.74	2019.29	1922.92		[M+H-H20]+ 194.08	15	3	27	TRUE	FALSE
421	M177T41	177.09	177.085	177.093	41.437	29.201	64.899	98	71	5126	10347.4	13541.8	11499.3	13862.8	9566.2	13162.3	12784.2	15256.4	12131.2	13525.5	15948.1	38765	34556.1	14147.1	24991.2	39175.9	36785.8	13412.4	19453.1	32210	19770.1	41189.4	29703.6	41730.6	49046.9	33815.1	40764.3	31866.1	32521.3	33737.9	35051	29163.1		[M+K]+ 138.129	7	0	0	FALSE	FALSE
422	M177T173	177.09	177.09	177.092	173.38	160.225	188.055	89	71	7214	23244.2	38531.6	26994.4	70576.3	33483.8	44533.5	44269.9	47637.8	22483.6	44862.9	21059.1	17719.5	1978.72	48163.9	8217.62	24853.8	22341.4	14877	2937.92	4558.31	22536.2	25043.9	19942.6	16490.4	25899.4	27851.7	16531.2	12384.3	17573.5	11356	14981.3	10087.2		[M+3Na-2H]+ 110.135	10	2	80	TRUE	FALSE
423	M177T151	177.09	177.09	177.092	150.53	139.598	155.508	48	46	3028	8597.42	7655.73	13988.7	13352.4	14283.1	14181.8	13856.5	15887.1	15173.9	11221	14124.9	13961.9	13525.8	15266.6	13496.2	15863.1	17156.8	14667.7	13915.2	11119.3	15595.3	14064.2	23384.5	25310.3	21722.7	23422.5	22766.8	34206	25665.5	24553.1	14467.5	22765.1			65	0	0	FALSE	FALSE
424	M177T407	177.123	177.121	177.124	406.668	399.334	424.316	44	44	1484	4320.24	5192.9	5465.65	6282.56	4731.73	6129.11	5621.07	5760.71	4634.49	4595.98	1226.54	642.142	562.215	506.349	1214.96	2825.62	1356.2	2671.23	992.416	1284.44	1194.01	1060.03	2038.6	2467.29	1899.14	2270.32	1924.74	2024.42	1964.86	2041.7	1870.86	1963.67			50	0	0	FALSE	FALSE
425	M177T37	177.127	177.124	177.128	36.7515	29.372	56.758	54	47	4308	7420.44	6993.2	6456.14	5724.94	6426.55	6960.84	6701.34	6717.54	7014.81	6217.8	5858.67	22182.2	21124.1	19791.2	2212.36	20167.4	1401.6	18852.5	19728.4	2784.43	20175.9	20788.4	21419.5	22036.8	14099.8	23451.2	18349.1	16238.6	19416	22090	15673.6	15427.7		[M+H]+ 176.124	1	15	106	TRUE	TRUE
426	M177T156	177.127	177.126	177.128	155.922	135.851	184.645	62	45	3211	17165.4	15774.4	16057.1	20478.4	17111.5	15213	16573.5	18395.5	17606.5	17348.4	18781.4	17306.1	16493.8	17404.7	2867.75	11061.7	7267.98	17006.9	17293.1	12399.4	19228.4	17873.9	18528	20398.1	20762.9	24349.4	14654.1	22911.3	16562.9	22616.8	16817	21425.4			46	7	66	TRUE	TRUE
427	M177T515	177.123	177.122	177.133	514.899	509.959	535.983	47	44	2399	3369.44	6121.33	1998.99	5200.19	3329.22	5227.88	6675.32	5063.89	3158.16	3804.92	4420.59	1997.16	3108.23	4828.07	5561.2	4242.54	13480.7	6302.92	3955.24	5420.16	6044.18	13203.8	2637.46	4199.47	5822.79	3807.42	5005.45	4230.73	1198.32	7149.74	4866.48	3365.06	[20][M+2]+		19	4	62	TRUE	FALSE
428	M177T110	177.163	177.162	177.164	110.162	105.082	129.856	47	45	7775	2710.42	3287.17	2555.64	2868.62	2513.98	3162.73	3188.04	3340.56	2819.56	2975.65	38892.8	32915.8	33321.4	45958.7	43732.8	42776.7	40430.8	26892	26193.8	32510.2	37572.9	28097.1	4399.43	3064.26	5007.5	6344.64	5419.41	6360.93	4950.02	6241.33	5097.02	6248.75		[M+2Na-H]+ 132.189	134	22	93	TRUE	FALSE
429	M178T333	177.878	177.877	177.879	333.106	327.736	340.133	59	59	369	725.801	835.992	670.116	690.797	938.959	543.588	709.651	973.354	844.244	700.849	1383.74	1333.86	1363.86	1629.66	1532.71	1449.46	1625.31	1505.83	1483.81	1397.8	1389.32	1492.85	1479.58	1626.81	1517.13	1098.88	1617.93	1486.84	1636.12	1335.25	1669.25	820.698			171	0	0	FALSE	FALSE
430	M178T429	177.947	177.946	177.948	429.209	427.373	432.798	82	82	1233	3915.92	3409.42	4968.25	3795.45	3366.16	3030.08	3406.55	2364.23	2610.28	2415.26	3198.22	2584.61	3301.99	3066.11	3267.49	3401.71	3025.12	2759.56	3830.31	3593.34	3149.61	3181.96	2195.33	1896.1	2367.31	2232.9	1832.07	2009.36	2671.3	2169.68	2005.47	1750.94			78	0	0	FALSE	FALSE
431	M178T142	178.07	178.059	178.072	141.58	107.198	155.132	83	59	6835	63814.8	62437.7	44277.2	5981.51	11447.7	62134.7	57350.2	63409.5	60252.2	34258.3	22544.8	13250.9	16968	18846.1	19719.5	14001.4	21478.2	7987.02	44964.7	44262.1	11341.2	13443.6	21703.5	18380.3	58678.9	14399.2	16471.4	17654.3	42188.5	30957.9	2504.7	60944			38	6	107	TRUE	FALSE
432	M178T198	178.122	178.121	178.123	198.291	195.67	203.508	66	66	20022	78320	82917	45492.1	90243.2	63551	117796	118370	146537	73092.2	143132	14292.6	12469.2	11551.3	13252.1	14323	13489.7	15023.6	11993.7	14020.1	11339.4	13390.3	14004.7	2119.54	1432.24	2106.31	515.475	1978.69	1473.45	2350.43	1050.39	1932.93	1654.55			30	19	76	TRUE	FALSE
433	M179T332	178.873	178.872	178.874	332.179	330.112	339.039	82	82	5249	17073.4	17284.6	18024.5	18595.7	18065.7	19041.8	17659.8	19185.3	18690.9	18174	35701.4	37544.2	36625.4	37352.3	33289.2	33720.9	37028.1	31882.8	32966.6	35783.8	34983.4	34100.1	46387.7	35407.2	39131.9	36977.5	42322.7	38258.2	46857.7	37482.5	44852.8	41025.2			89	0	0	FALSE	FALSE
434	M179T346	178.95	178.948	178.951	345.915	343.053	348.986	45	45	2492	3552.05	3494.71	3469.9	3147.64	3649.39	5989.46	4021.37	3631.96	2868.06	6329.01	639.562	1625.44	2143.98	1679.29	577.344	723.652	2021.49	565.98	718.971	699.504	1042.43	751.161	7800.64	5270.74	7323.49	5696.18	6811.65	5304.87	7976.21	6015.43	7987.61	5656.04		[M+K]+ 139.989 [M+H-2H2O]+ 213.965	54	0	0	FALSE	FALSE
435	M179T416	178.992	178.99	178.994	415.867	403.652	424.97	70	58	705	908.716	343.886	752.766	1180.97	1304.02	416.105	1130.52	625.747	1376.98	659.634	1975.8	2071.5	987.989	1806.81	1323.43	2532.55	1602.11	2089.84	1265.03	1022.03	1319.2	1561.08	1171.13	418.211	1322.99	1030.43	1315.22	1313.13	927.529	1003.53	1270.65	992.496			22	0	0	FALSE	FALSE
436	M179T285	179.07	179.067	179.071	284.548	280.676	288.171	66	66	7879	28552.4	21620.6	30784.1	21797.7	29539.4	22512.2	21511.8	23888.2	33074.4	20932.5	8902.63	7246.99	7551.77	7103.51	9779.3	8940.39	9691.57	7937.7	7330.92	7917.57	7888.79	9172.89	939.208	1917.59	4784.27	2069.88	5080.99	2076.34	5111.94	2345.28	6593.66	2148.63			126	14	416	FALSE	FALSE
437	M179T183	179.07	179.068	179.071	183.092	173.807	197.096	67	64	2868	9073.72	10218.3	6587.4	19485.4	9517.27	29771.2	16089.7	10893.3	10925.2	12246.2	18263.3	17107.9	10937.4	26071.5	15437.3	14921.7	15458.1	14881.7	15481.8	8661.86	17092	11231.9	27778.1	13959.6	24780.1	18548.9	13722.6	19255.9	12401.9	11186.4	23444.6	11927		[M+H]+ 178.065	29	16	52	TRUE	TRUE
438	M179T65	179.07	179.069	179.071	65.368	58.591	70.096	52	50	21284	19623.8	24707.7	15284.2	23939.1	18012.4	24112.3	23730.9	24250.7	20664.5	24759.1	37185.4	35897.4	33382.3	41729.7	44098.4	39749.8	42473.4	39614.9	38753.2	35647.5	37862.4	40177	314849	181090	316733	152640	332409	220814	310286	228755	315239	200949		[M+H]+ 178.062	77	21	223	TRUE	FALSE
439	M179T109	179.106	179.105	179.107	109.337	104.651	124.447	60	56	12554	20823.3	167658	19879.2	146502	20313.2	139016	133328	137365	21493.5	141381	35617.7	25743.5	21581.3	36697.1	37536.3	36292.5	35317.6	32907.6	30165.2	30454.9	31134.3	20898.7	45263.1	23338	36666.8	19391.3	39819.9	26459.4	40754.1	29550.1	7578.22	40676.3		[M+H-H20]+ 196.112	134	16	139	TRUE	TRUE
440	M179T39	179.106	179.105	179.11	39.469	32.179	67.821	66	60	7242	7526.71	4424.83	9001.4	4843.08	7123.8	8076.22	4756.03	6100.66	8512.21	7498.54	30402.2	20258.1	21989	16921.9	34614.4	16495	10660.1	7423.98	10450.7	17930.7	15478.9	17097.5	30469.6	25632.4	26971.4	26893.9	27224.6	33354.1	30951	36591	30097.9	26232			2	17	93	TRUE	TRUE
441	M179T171	179.106	179.105	179.111	171.138	163.087	187.735	43	43	6147	36349.7	54889.3	46953.1	49391.5	33583	61628.2	51629.6	56498.1	37766.6	61612.8	10795.9	18897	13172.4	8226.02	18608.6	20057.2	7885.19	6249.11	32408.3	19446.9	19942.4	17881	14650.7	12085.1	14611.9	9779.62	15906.7	8434.09	17068.1	10356.4	10211.9	13056			10	22	98	TRUE	TRUE
442	M179T539	179.128	179.126	179.129	538.557	530.361	551.543	62	57	2792	2928.14	1059.71	2828.44	1064.64	2538.95	1251.09	2521.42	2353.26	2726.96	2048.63	3339.99	2845.45	3140	3700.13	4221.93	3915.54	4179.35	3397.02	3431.52	3716.15	4380.93	3621.87	11775.8	10665.8	10990.7	11342.6	11784.8	10838.9	11659	10197.9	11537.1	12104.7			100	0	0	FALSE	FALSE
443	M179T159	179.142	179.14	179.143	159.381	152.625	175.091	55	49	8148	24992.9	41744.6	22307.1	24310.8	38973	23167.9	23740.8	29691.7	23294.2	19881.2	42304	39437.5	34469.9	35965.4	35322.2	36673.3	42703.7	6050	32511.2	40124	33329.3	33894	3103.2	13099.3	2885.99	7580.22	10382.8	12004.1	12515.7	13121.8	1607.64	7559.01			9	38	208	TRUE	TRUE
444	M179T134	179.142	179.142	179.154	134.148	119.955	138.885	76	74	16935	26960.1	19648.6	19313.9	21749	23945.8	22758.8	22833.6	25131.5	25925.7	22575.7	82193.9	75949.8	120222	140354	99264.6	96416.4	87785.4	82881.4	76767.5	76887.6	101426	78020.2	34577.7	10507.8	29508.4	20561.6	11425.9	22260.1	32562.3	24841.6	35264.3	24838.3		[M+3Na-2H]+ 112.187 [M+CH3COO+2H]+ 118.107 [M+H]+ 178.138	13	61	145	TRUE	FALSE
445	M180T255	180.086	180.085	180.087	255.168	243.522	259.8	82	82	6116	52973.7	55051.7	57415.4	62697.7	56882.5	65223.7	55125.1	63524.2	57176.1	63510.1	38966.3	28760.5	30160.5	37503.2	43991.1	35840.3	44300.7	35248.6	38490.4	30929.6	36033.9	31513	31437.7	39379.7	38574.1	40047.5	37242.1	32985.8	39963.7	40270.8	36832.2	43142.9			152	35	21	FALSE	FALSE
446	M180T302	180.086	180.085	180.087	302.423	293.692	318.923	80	68	2393	20014.7	19579.9	21170.8	25126.8	25556.5	20787.4	22808	18611.4	21125.8	30475	23032.3	17530.3	17669.8	20409.9	11476.2	11354	23404.4	25626	10293.6	18312	25673.2	8297.58	23205.9	21872.2	11025.7	23242.7	21094.3	27742.6	18808.6	28334.4	23729.1	18785.1		[M+Na]+ 157.09 [M+H-H20]+ 197.091	23	30	21	FALSE	TRUE
447	M180T229	180.101	180.101	180.102	229.028	221.739	237.274	63	63	11737	5761.6	3731.55	3582.83	3254.33	4121.69	10581.8	4254.6	3644.45	3781.78	9926.8	10275.1	11070.7	10377.6	10258.4	10933.5	10196	14362.3	10625.5	4247.43	6355.75	8926.2	7660.45	748.419	1041.31	698.939	1247.39	880.022	1398.48	776.412	1185.79	1098.62	789.046			149	15	31	FALSE	FALSE
448	M180T39	180.101	180.1	180.11	39.343	32.007	52.002	83	81	63765	4221.33	6943.44	4888.5	2331.29	5249.15	1672.16	2314.43	3053.15	5014.02	2995.63	253245	228183	202374	263030	257477	223859	249621	224103	219235	231709	207813	193806	3368.36	16703.6	2236.7	14063.9	1012.46	12106.1	4634.88	10704.8	4406.3	10950.8	[21][M]+		2	56	283	FALSE	FALSE
449	M180T134	180.146	180.144	180.157	134.347	115.061	140.365	70	64	2439	4177.63	4075.69	3695.51	4065.08	3972.56	4011.79	3989.1	4456.96	4228.49	3907.82	11870.8	16353.1	9590.09	11415.8	14054.7	14755.9	15266.3	12208.5	14451.5	11289.3	9871.83	9500.39	4452.06	1504.08	3950.96	3635.04	4113.06	3682.46	4330.74	3565.41	4605.42	3669.47		[M+NH4]+ 162.108	13	0	0	FALSE	FALSE
450	M181T333	180.871	180.87	180.873	332.546	329.263	338.703	65	65	389	1197.47	997.468	1023.11	1177.17	1223.27	1203.66	1198.15	1366.17	1057.51	1030.28	1803.02	1864.33	1924.78	2125.27	1989.99	998.325	1995.7	1139.62	1300.34	1851.01	1984.7	1815.25	2235.34	2157	2016.75	1912.55	2104.89	1652.65	2170.1	1904.69	2619.48	1995.49			177	0	0	FALSE	FALSE
451	M181T362	180.978	180.977	180.979	361.998	355.412	389.786	70	63	1606	2433.37	4017.49	14075.6	12191.9	12561.7	11143.9	3160.83	10161.6	5782.49	10083.9	6186.1	6470.1	6853.8	6166.68	10789.1	9587.92	5226.85	8059.21	4158.59	6802.31	3593.07	6974.77	2520.09	3994.46	6063.91	3259.66	5050.34	2998.9	4085.55	1899.25	3753.14	1983.22		[M+H-H20]+ 197.983	140	0	0	FALSE	FALSE
452	M181T384	181.008	181.006	181.009	384.418	375.571	389.607	55	55	1038	772.837	436.844	6412.53	4925.27	5878.6	972.452	6128.94	917.303	338.311	914.83	1081.08	949.475	1191.42	5111.58	5706.35	674.377	262.65	746.054	704.523	280.5	1244.49	5737.78	3851.68	3782.31	743.706	3874.18	625.644	4154.16	895.945	3554.27	456.297	3651.61		[M+Na]+ 158.018	165	0	0	FALSE	FALSE
453	M181T284	181.028	181.027	181.029	283.843	267.901	295.856	110	79	4992	30633.6	21515.9	39993.1	19160.6	18337.2	21196.4	47079	33648	39458	57646.1	38142.9	29736.7	20076.8	30149.5	31353	86400.7	17038.3	28669.9	116731	36269.1	36131.9	21521.7	45618.2	11888.3	25032.8	25597.7	23024.9	14303.1	27982.2	28720.3	49101.4	18035.4		[M+K]+ 142.063	126	44	134	TRUE	TRUE
454	M181T156	181.028	181.027	181.029	155.839	136.896	160.689	66	63	4040	30860.9	38670.5	13260.8	56098.1	44844.6	59495.7	37547.5	32166.8	44457.3	27635.2	24500.6	19418.4	21478	19816.7	14856.5	22045.3	25105.8	19909.3	39134.4	27519.9	31598.5	32898.7	31391.6	10493.1	60113.2	37110.5	32384.1	43067.6	27658.2	43979	22506.4	40540.1			46	32	52	TRUE	TRUE
455	M181T232	181.028	181.027	181.028	232.404	225.252	241.836	49	46	3884	20908.9	23504.4	30268.6	20657.4	27723.5	23305.3	24497.9	21106.1	14426.2	20282.7	33628.3	27512.1	25551.3	23200.7	27331.5	23846.3	18119.2	20996.5	32896.5	36131.8	24020.7	12440.6	32676.9	37950.4	43466.8	74525.3	42788.7	26829.9	39029.5	32675.9	31991.8	35848.3		[M+CH3CN+Na]+ 117.012 [M+CH3CN+H]+ 138.994	52	23	34	FALSE	FALSE
456	M181T182	181.028	181.027	181.029	181.911	172.145	195.738	69	62	5057	28920.1	33273.9	51125.9	41792	45138.8	45622.7	38346.8	34354.5	38153.4	57844.4	28059.4	26424.1	24223.8	29981.5	20922.5	27758	19861	23844.5	28957.5	31438.4	28980.3	36550.4	30868.6	40916.7	29088.2	44986.9	41705.3	27570	15726.4	15100.9	17524.5	22405		[M+K]+ 142.067	29	31	75	TRUE	FALSE
457	M181T183	181.085	181.084	181.087	182.816	167.435	198.867	94	76	3217	17079.5	12925.2	10540.1	17958.3	16616.3	16250.2	15484.8	17516.1	16766.7	18345.1	12048.3	10878.5	10290	12574	14789.7	14103	12510.4	22130.9	26730.9	22797.3	20097.8	31724.4	23466.2	10880.8	43355.8	11071	34415	13140.9	17392	12575.4	35922.9	23958.3			29	7	50	TRUE	TRUE
458	M181T217	181.085	181.085	181.086	216.678	204.214	225.12	67	64	6998	38773.4	68848.3	57840.5	34872.3	3616.57	38495	34740.7	41415.8	32835.7	38342.9	14738.5	25350.7	17273.5	16779.7	15412.2	14191.3	18191	13935.6	10667.3	11944.9	13846.4	12556.6	3895.95	2619.62	3439.68	2114.53	3864.68	2856.3	4033.6	2651.15	3893.04	2432.81			83	10	50	TRUE	FALSE
459	M181T36	181.085	181.082	181.086	36.435	30.023	53.643	67	63	11667	14069.2	14039.4	14488.2	17550.7	9808.92	20025	17220.1	14132	16812.9	19442.4	8484.88	24538.3	8479.87	33258	14947.9	11008.7	4619.61	13117.8	6932.59	7926.28	4879.96	8168.61	66670	54693.4	72095.3	45210.4	59371.3	53019	49431.4	58767.4	62144.6	56851.8			1	1	84	TRUE	FALSE
460	M181T39	181.104	181.101	181.105	39.343	32.313	54.716	69	66	11667	19174.3	20391.2	16940.6	19828.1	16306.1	21515.3	21110.3	19594	17645.2	18686.4	34353.8	30020	32200.8	40397.3	37789.9	28443.1	29869	29799.9	34224.3	21419.2	37973.6	36491.4	52844.1	55012.6	63847.5	2736.28	60338.1	2874.14	57545.8	52163.6	513.06	4593.85	[21][M+1]+		2	0	0	FALSE	FALSE
461	M181T166	181.122	181.119	181.124	166.232	147.373	199.008	54	45	2342	17063.3	8375.59	9368.24	15585	16536.3	4405.57	8781.39	8402.41	18595.8	10923.7	10754	4916.57	10430.8	9718.47	6568.21	5680.4	11902.3	5866	10699.8	10788.7	10651.1	11545.2	7941.73	13672.7	5054.4	9494.07	3534.66	13697.9	4774.98	8100.89	13916.4	1832.05		[M+H]+ 180.114	87	0	0	FALSE	FALSE
462	M182T295	182.032	182.029	182.034	295.225	274.387	301.209	51	50	1182	3056.76	3985.29	563.383	3797.43	3955.93	4545.46	6336.01	4347.2	3408.52	4101.77	3834.5	3645.23	4294.86	2779.26	1199.79	2368.59	1462.81	2665.78	5187.67	3976.72	4497.61	3860.88	3334.29	2390.21	2507.71	3870.12	3440.28	2605.12	997.15	4837.48	3174.28	3421.47			23	0	0	FALSE	FALSE
463	M182T271	182.057	182.056	182.059	271.072	266.912	272.98	70	70	3059	1284.9	1269.42	1369.75	1231.59	2005.52	1144.62	1179.75	1337.4	2036.86	1110.24	1412.13	1346.3	2164.76	1507.14	1216.76	1436.3	1393.64	1552.03	1451.67	1442.35	1382.06	1802.1	849.29	780.773	508.961	531.244	752.464	1069.59	644.863	773.644	534.24	1088.49			99	6	13	FALSE	FALSE
464	M182T358	182.057	182.056	182.059	358.046	352.412	360.624	50	50	889	869.861	1578.17	613.14	1457.99	741.728	1355.95	1094.74	1622.5	838.796	1061.49	669.392	545.176	517.729	374.434	720.519	754.69	570.999	522.971	854.541	506.987	946.238	914.219	587.07	727.675	596.59	1062.55	581.867	817.204	726.602	1164.59	732.267	1052.7		[M+K]+ 143.094	97	4	3	FALSE	FALSE
465	M182T309	182.08	182.077	182.082	309.049	297.641	324.448	98	80	9869	5272.04	15871.2	7789.33	19393	8954.24	15575.7	18048.8	12385.9	9087.27	12714.6	9317.6	7270.57	11718.4	7280.23	10477	9380.33	11364.1	9601.73	9077.83	9375.83	10257.3	8646.48	27417	45340.7	32562.8	36381.2	32730.2	39176.4	30953.8	38991.6	31662.2	32968.8			37	18	37	TRUE	FALSE
466	M182T417	182.08	182.079	182.084	416.539	413.249	432.394	87	77	1424	4403.61	1550.09	4645.52	1695.72	1359.83	1453.35	1460.52	1392.61	2545.3	1739.49	4188.7	2188.37	2685.48	3601.28	3511.82	4041.59	3520.35	4627.47	3564.44	2977.43	2542.92	2174.73	3879.51	2514.49	2778.87	3407.9	4919.92	2940.92	3643.09	2468.24	2522.15	2896.67			22	1	52	FALSE	FALSE
467	M182T126	182.081	182.079	182.082	125.84	121.382	136.485	58	56	1889	6397.51	6553.24	6101.34	6100.21	6339.8	6281.32	7184.56	6789.94	7417.3	7513.55	9758.92	10501.8	8966.93	14273.2	10274.8	7074.64	8481.66	8408.18	5677.87	4687.85	11545.6	6833.83	6530.48	14598.5	11877.7	14214.7	12181	12774.4	16753.6	11923.5	11418.8	13226.7			13	12	55	FALSE	TRUE
468	M182T210	182.081	182.079	182.089	209.77	193.06	225.093	77	74	3013	7686.93	5623.21	4926.3	6491.93	5411.46	1556.92	2846.21	4724.9	2858.89	4864.52	4367.89	4457.99	5001.04	3798.7	4460.77	4537.1	4637.03	3970.29	3421.29	3737.04	4270.4	3607.44	4250.38	2765.77	4417.21	2016.92	4795.67	4742.77	5480.87	4433.94	4854.64	4708.21			72	12	37	TRUE	TRUE
469	M183T328	182.945	182.942	182.946	327.885	325.133	342.405	53	48	508	615.403	631.712	503.936	424.81	475.616	315.455	319.852	196.104	310.789	379.321	804.559	924.501	796.848	1112.79	1324	1135.19	1355.02	1285.87	1269.26	931.933	1036.12	1006.45	1479.91	1529.26	1904.67	1468.05	1913	1564.37	1537.97	1523.12	1263.36	1665.2			138	0	0	FALSE	FALSE
470	M183T407	183.085	183.082	183.087	407.013	399.96	414.376	60	60	1017	763.14	632.856	853.89	809.257	717.733	968.555	624.063	846.466	659.569	702.112	613.447	705.613	926.067	1676.07	2054.43	1901.6	1705.94	821.539	858.172	879.84	1376.16	1395.09	1098.72	1770.9	1486.13	1861.34	1455.18	1288.04	1843	1789.19	1075.53	1268.71			50	0	0	FALSE	FALSE
471	M183T173	183.101	183.099	183.102	172.832	155.437	181.567	43	42	1764	6855.94	6740.49	635.286	6901.89	7292.15	4283.74	3810.61	4858.97	7924.8	3197.51	10932.3	10025.4	10019.7	10106.9	5230.93	9539.74	3162.06	5075.49	6425.98	4275.95	9984.48	10378.1	5464.37	6552.27	6530.63	2069.63	5890.27	6244.42	6236.72	1909.9	1653.46	6338.99		[M+H]+ 182.095	10	0	0	FALSE	FALSE
472	M183T33	183.116	183.114	183.117	33.112	29.593	49.535	78	68	7860	8146.87	7879.71	7437.26	7088.29	6932.64	7206.39	6250.19	7166.76	7291.44	7576.02	21226	25531.1	20526.6	23949.7	32106.8	35767.8	24074.8	20745.5	33026.3	20566.8	27720.4	50997.6	15534.1	11285.9	4695.46	13375.7	8072.67	14601.8	9134.63	13265.4	8547.35	10736.1			3	2	37	TRUE	TRUE
473	M184T284	184.045	184.042	184.047	284.381	273.523	298.811	45	41	1058	1914.66	4513.03	3458.45	1083.36	3701.41	2896.81	3462.07	2636.92	2223.2	2615.71	2495.36	525.19	1459.05	6335.88	11200.8	4986.41	4251.49	3223.59	3556.8	1850.27	2269.23	2045.47	2320.24	2558.71	3015.25	2865.29	1501.87	2631.25	2066.76	991.342	1923.3	1515.59			126	0	0	FALSE	FALSE
474	M184T148	184.063	184.062	184.064	147.579	145.436	149.583	82	82	43368	361667	117660	292232	102614	311470	123219	107576	128249	355265	122120	179958	157762	148909	158964	169406	179722	190752	161512	139160	157962	170710	144458	187746	247960	187426	267410	202208	282928	227109	301353	190156	301034	[22][M]+	[M+H]+ 183.056	24	57	141	FALSE	FALSE
475	M184T512	184.073	184.071	184.075	511.839	504.195	533.877	84	76	2399	1513.25	1647.61	973.431	666.112	264.83	736.099	1482.56	2931.28	616.252	3241.43	7354.16	4676.82	6615.48	9606.85	6647.4	5269.79	9187.1	12378.4	6134.05	10488.2	6263.03	2718.78	980.465	1340.71	1383.91	1625.67	2139.31	2779.76	1041.88	1369.7	2946.25	3184.44			180	3	21	FALSE	FALSE
476	M184T354	184.094	184.093	184.095	354.472	350.027	371.516	47	46	1322	868.893	345.922	1129.75	714.831	912.191	381.869	570.499	655.182	748.67	621.088	1251.73	1045.15	687.86	1391.14	1527.69	2090.65	1705.36	1731.2	1870.64	1522.95	1123.41	1521.77	661.278	918.441	1200.08	773.191	945.72	870.971	814.826	878.946	1884.05	812.172		[M+Na]+ 161.104	90	1	2	FALSE	FALSE
477	M184T112	184.096	184.092	184.1	112.355	97.238	143.616	49	44	3042	5434.54	4856.01	4990.99	4448.11	4954.53	4616.67	5129.01	4891.33	5049.82	4782.91	12900.4	5376.93	11567.2	20252.8	4037.01	15911.1	14685	7654.03	12912.5	5322.63	19988.1	12528.2	44561	48166	62189.1	39163.2	60512.3	38688.9	49854.5	43689.6	58990.9	39028			134	11	158	FALSE	FALSE
478	M184T36	184.12	184.119	184.133	36.5	29.095	56.72	52	49	5445	4968.43	4476.99	5207.7	3753.45	3359.45	5126.5	4380.42	3181.05	4266.63	4209.17	4837.79	7322.74	3670.57	3454.16	5532.77	7635.76	5285.68	3181.81	3147.96	2655.4	3747.4	3305.71	1980.26	3361.94	20771.6	15588.2	19586.9	14608	918.245	3383.22	17211.3	3357.7		[M+H-H20]+ 201.127	1	6	124	FALSE	TRUE
479	M185T148	185.066	185.064	185.068	148.262	143.838	157.427	81	79	2727	12839.5	6571.97	12649.1	5104.12	11499.3	6037.69	5456.1	6765.35	13081.7	5989.02	8171.18	7730.18	6415.64	6972.05	7774.49	9517.12	9767.12	9274.93	6620.08	7181.37	8534.75	7094.98	6442.59	10830	8979.74	10742.2	8797.52	11771.3	7403.51	11684.5	8068.98	11252.8	[22][M+1]+		24	0	0	FALSE	FALSE
480	M185T35	185.095	185.093	185.097	34.719	27.853	69.653	81	70	3076	8471.57	10642.4	9598.08	993.806	6829.21	8756.89	9472.75	1222.74	8811.52	1262.72	20722.9	17275.2	13344.4	15640.5	9576.21	15938.1	16180	13564.4	16389.8	12402.2	27881.8	21418	11943.3	4063.7	10943	5431.56	1526.37	6774.27	1104.4	2995.93	12057.4	8150.35			1	0	0	FALSE	FALSE
481	M185T36	185.132	185.127	185.135	35.9115	29.245	55.295	66	59	3417	1212.7	1501.31	9437.47	2004.65	3174.29	1097.54	9206.95	1514.46	8930.63	1421.21	11006.3	12041.5	14493.6	20310.4	8304	14417.4	20934.8	11063.5	21759.9	8744.25	14764	9238.9	10742.3	20911.1	17049.1	18590.7	19146	18575.9	17185.5	21683.1	17045.7	16736.6		[M+Na]+ 162.135	1	3	42	TRUE	TRUE
482	M186T399	186.007	186.006	186.008	399.205	390.88	410.154	63	62	821	278.924	377.464	265.789	293.049	221.81	232.44	338.831	163.26	287.582	270.923	1920.91	1958.79	2068.66	1478.88	2207.15	1656.16	1551.54	1790.49	3058.64	1796.75	2197.55	1956.94	349.637	460.6	312.493	490.82	331.855	374.776	388.847	428.997	217.653	426.632			67	0	0	FALSE	FALSE
483	M186T148	186.059	186.058	186.064	148.45	143.848	154.371	72	70	2008	9147.67	2718.45	10199.3	3564.26	9897.69	3938.53	4182.72	3444.68	10125.9	4672.26	6706.44	5407.06	5190.01	5863.87	7242.9	5751.25	4684.91	6205.54	5431.25	4626.3	6386.88	4383.66	5587.05	10807	6231.76	7267.9	6268.07	8155.72	6993.52	8483.73	6290.38	8276.92	[22][M+2]+		24	0	0	FALSE	FALSE
484	M186T431	186.075	186.074	186.077	431.021	427.677	433.529	55	55	2155	2753.24	1945.82	689.985	2023.9	3344.13	2000.46	3245.83	2472.69	2558.95	3465.39	3046.57	1254.12	3750.89	3230.93	2842.35	2929.58	2884.52	2279.13	2318.66	2252.16	1544.38	1692.91	3382.32	4059.37	3615.21	4202.14	1532.35	3834.19	4494.13	3973.02	3745.45	3524.77			187	0	0	FALSE	FALSE
485	M186T405	186.075	186.074	186.077	404.954	394.162	415.168	61	55	884	4410.27	4160.92	3640.7	4021.56	4249.66	4338.28	3659.88	4754.05	4268.19	3372.24	4889.08	4439.4	4293.73	2282.65	3369.1	3216.09	1785.31	2508.11	2786.13	4780.44	3409.19	1397.1	3036.97	4676.76	3125.27	4762.18	3264.39	4120.48	3809	4146.6	2786.04	4041.23			98	0	0	FALSE	FALSE
486	M186T253	186.076	186.074	186.077	253.076	241.183	268.583	44	43	1006	5285.38	3683.02	4022.93	432.28	4050.12	4482.37	1338.95	3834.66	4887.28	2996.47	1593.53	1737.94	1518.98	2269.07	2398.35	3019.1	2902.27	2428.12	1618.66	1695.01	1760.58	1178.55	1772.08	1121.46	821.343	1603.68	1893.19	1576.99	1365.21	1471.12	842.582	1415.13		[M+CH3CN+Na]+ 122.06 [M+CH3CN+H]+ 144.042 [M+H-2H2O]+ 221.089	70	0	0	FALSE	FALSE
487	M186T409	186.148	186.147	186.15	408.939	403.497	434.161	88	82	3071	4625.25	4043.8	4204.49	4262.63	3741.53	4314.31	3062.46	4629.68	4428.18	3989.79	4977.67	3984.56	5213.61	5069.8	5096.73	4007.22	5537.2	4185.32	4041.95	5930.75	3714.8	4166.36	3059.35	4677.49	2841.58	4475.06	3220.08	4026.83	3819.49	4108.13	3133.5	4184.43		[M+H]+ 185.136	81	1	10	FALSE	FALSE
488	M187T359	186.995	186.994	186.996	358.651	353.222	364.642	68	67	9601	191.922	99.4684	122.427	212.123	221.712	152.593	93.3866	214.954	165.207	106.717	3518.71	3294.84	3852.8	2944.01	4741.27	5908.95	5035.8	4275.41	4102.31	4630.12	4355.91	4329.7	5859.4	954.115	6776.17	679.793	6165.86	1003.31	6163.66	874.665	4987.01	851.653		[M+Na]+ 164.005	144	6	1	FALSE	FALSE
489	M187T303	187.078	187.076	187.079	302.877	292.121	305.931	74	70	1809	6811.45	5686.64	7216.85	7352.47	6272.76	6973.9	6739.74	5503.98	6287.23	5947.41	4869.78	4556.79	3770.93	2940.21	6962.97	10013	18725.2	9440.44	5914.43	2176.39	6094	8246.47	5598.01	4754.54	3827.38	3234.79	5914.65	5415.17	3041.56	4743.13	1810.69	2699.3		[M+Na]+ 164.089	23	0	0	FALSE	FALSE
490	M187T257	187.078	187.077	187.079	257.444	246.087	261.209	73	73	2549	7587.32	13947.1	15135.2	14528.4	14352.8	15702.6	14011.2	15156.2	12738.8	14037.5	6692.08	5626.19	4425.72	7587.64	7928.62	23535.8	21122.1	11911	5585.67	5551.08	5542.12	6028.57	2505.77	5145.35	4736.09	5309.29	4346.91	5759.71	5032.65	5823.19	7233.07	4606.68		[M+Na]+ 164.089	35	0	0	FALSE	FALSE
491	M187T42	187.075	187.073	187.076	42.044	29.245	67.09	48	46	14222	12026.3	5599	10441.1	9365.67	13560.3	10023.1	12998.2	10047.6	8050.02	5276.92	7084.17	33791.8	4849.86	10202.4	32258	31868.6	11869.1	7374.46	4562.61	32943.3	7407.1	4235.09	147447	75533.8	171157	95951.6	144754	105955	144595	99723.5	161304	97290.4		[M+H-H20]+ 204.08	7	4	67	TRUE	FALSE
492	M187T377	187.107	187.105	187.109	377.405	375.5	386.934	41	41	968	2232.95	415.14	2510.62	2382.89	2416.33	2369.54	3432.25	2641	1018.85	2528.34	2249.19	1876.66	1728.47	2244.92	1779.91	3278.85	1854.98	1791.52	2261.59	2081.02	2185.28	1561.62	3556.52	4973.94	9534.05	10135.4	4562.8	5698.13	3859.65	4381.91	4734.25	8126.29			34	0	0	FALSE	FALSE
493	M187T39	187.111	187.108	187.114	38.5275	27.423	61.045	92	69	14222	2627.37	13636.8	4781.05	12728.1	2798.78	607.299	3008.56	598.943	15138.8	13550.5	30110.7	12754.5	26976.4	14807.6	39163.8	39178.1	25529.6	14084.9	16818.9	26071.2	13641.8	31891	6165.36	10946.4	5624.12	18025.5	88512.7	15046.4	96860.9	11221.2	9116.79	12718.6			2	7	77	TRUE	TRUE
494	M187T475	187.144	187.143	187.145	474.7	465.969	486.111	82	82	1295	4802.12	1346.67	3787.01	1318.46	3794.08	2045.43	1564.96	1569.88	3830.87	1349.21	3269.88	3142.13	3370.93	3213.26	2920.43	3277.08	2817.4	2941.58	3822.92	3519.5	3173.49	3244.33	6053.78	4553.36	6069.25	4055.15	5631.86	4048.58	6011.3	4338.7	5808.65	4281.71			197	21	21	FALSE	FALSE
495	M187T200	187.147	187.145	187.149	199.894	184.242	214.358	51	48	2392	3768.71	3680.06	3299.37	3889.37	3489.03	3549.82	1313.12	3849.52	3852.24	3423.16	6693.95	6637.56	12969.2	12496.8	7512.74	8210.65	8388.3	6657.55	6227.93	6901.07	7621.05	6855.26	4052.18	3824.08	3980.46	3836.69	3225.8	4021.36	3973.52	3844.13	4013.49	3986.31		[M+CH3COO+2H]+ 126.123	30	1	38	TRUE	TRUE
496	M188T267	188.07	188.067	188.071	267.404	262.547	289.333	88	82	39014	13997.7	16987.4	10941.4	17752.2	11310.7	17502.7	17354	21490.2	12824.3	20541.5	17174	18288.9	16281.2	17878.5	19637.2	22828.5	21572.4	20761.9	14561.3	16752.3	18253.4	16966.9	130804	118862	115194	127446	120590	154280	126659	143145	128476	153816		[M+Na]+ 165.079	48	26	109	FALSE	FALSE
497	M188T506	188.115	188.114	188.117	506.175	502.267	519.656	50	50	989	2228.35	2620.95	3006.36	2856.35	2339.98	3179.99	3030.43	2296.44	2985.93	2419	958.66	1109.65	840.6	867.583	806.682	1072.36	768.769	1126.14	800.617	760.67	1352.83	963.641	1707.29	1885.72	2055.71	2165.86	1838.73	1833.87	2557.6	1731.01	2112.93	1697.98			71	1	7	FALSE	FALSE
498	M188T159	188.2	188.198	188.202	158.882	156.285	166.243	57	50	883	629.807	505.522	641.478	509.267	537.98	522.938	656.108	453.793	725.086	360.771	1248.57	773.483	1011.05	1078.26	1200.21	980.78	1864.36	1267.71	823.774	1898.59	1265.21	564.72	259.971	742.84	1057.79	897.991	335.886	424.754	403.318	666.848	456.148	664.313			46	0	0	FALSE	FALSE
499	M189T362	189.036	189.035	189.038	361.631	350.027	374.048	88	75	667	1630.8	2010.37	1411.85	1411.17	828.684	1569.93	2118.8	1816.12	1105.56	2032.1	3809.95	4165.21	4268.37	3817.33	4579.45	4954.39	6343.38	4769.24	2073.92	2403.65	2820.47	4142.97	2223.66	4860.23	4922.4	4646.95	1976.85	5046.58	494.34	4998.55	4752.38	4222.16			140	0	0	FALSE	FALSE
500	M189T162	189.09	189.089	189.091	161.87	138.627	169.425	56	49	18677	14088.4	15348.6	19935.2	7000.03	9683.76	20914.1	36072.4	5595.74	13857.5	11056.1	20759	63298.4	20585.4	21299	16281.2	24433.2	60775.9	18266.2	56061.3	18887.8	60870.7	59080.5	50690.2	25240.9	13223.1	18431.9	21336.6	26160.5	24922.7	21102.6	117653	91494.7		[M+K]+ 150.135	9	13	112	TRUE	TRUE
501	M189T183	189.09	189.089	189.091	182.839	180.387	199.58	85	81	9912	31085.6	30577.6	18630.2	34760.2	22064.8	22836.6	36755.9	28968.8	43230	44414.9	36662.9	61542.5	28465	30782.8	56660	36817.8	69115.6	32843.5	58574.4	33656.6	66668	36471.5	40976.1	29200.8	84020.5	32528.2	37273.3	32894.7	39766.8	37446.9	43876.8	33300.5		[M+H-H20]+ 206.096	29	8	70	TRUE	FALSE
502	M189T42	189.09	189.089	189.092	42.471	29.245	54.145	71	63	77894	29830	44967	37973.4	40782	29118.8	38417.2	44192.4	42623.6	33883.2	42459.4	31373.2	19357.7	15035.3	23703.6	21295.6	35990.5	17896.9	2731.59	22965.8	32830	17576.8	32085.7	374485	280680	405649	350113	396676	367529	386853	345075	389701	308502			7	17	124	TRUE	FALSE
503	M189T69	189.09	189.09	189.091	68.734	55.283	99.81	63	49	11197	22345.5	26792.2	24504.9	26275.3	23454.7	24836.2	14566.1	15793.8	12561.4	9201.74	28250.8	20824.1	18499.2	38705.7	40554.1	95745.1	45483	37780.8	29226.6	26582.4	47426.4	93808.3	103006	112757	111711	106541	104959	105092	97603.6	86260.2	117768	93450.9		[M+H-2H2O]+ 224.112	77	18	221	TRUE	TRUE
504	M189T313	189.09	189.088	189.094	312.523	283.644	314.724	45	45	1465	3411.28	1148.3	2300.09	2113.56	1570.43	2694.46	2612.72	3374.35	2202.74	2338.05	1383.09	1231.44	1508.16	978.272	1595.79	3173.25	1676.58	356	862.436	1144.52	1416.33	1204.03	1820.69	1458.9	1417.82	1449.27	1656.83	1721.92	1753.99	1724.29	2038.18	1811.05		[M+H-H20]+ 206.096	66	0	0	FALSE	FALSE
505	M189T134	189.127	189.126	189.127	134.155	127.079	144.949	82	76	26998	45421	52224.3	41275.8	52965.7	43015.5	59231.8	57952.6	53765	62014.9	49120.2	153192	229049	211229	465530	179967	254620	259938	233821	172795	421361	222368	324836	38305.9	63799.9	26948.7	61189.7	37289.9	54574.3	25132.6	56157.1	39172	53688.4	[23][M]+	[M+H-H20]+ 206.136	13	68	174	TRUE	FALSE
506	M189T160	189.127	189.126	189.127	160.454	155.669	183.971	75	73	18915	67090.2	60636.8	53549.1	47988	54413.9	53524.2	54971.2	55147.8	60511.6	52589.7	83463.5	75722.8	70410.9	78875.7	67707.4	94642.5	77344.2	82955.4	69752.6	78115.3	79057.9	76070.6	19141	31137.3	17027.2	43550.2	18782.3	27824.6	16952.4	11190.9	19561.9	26679.7	[24][M]+	[M+Na]+ 166.136 [M+H-2H2O]+ 224.134	9	61	100	TRUE	FALSE
507	M189T109	189.127	189.126	189.127	108.94	77	112.561	48	47	10956	27401.9	19989.1	22565.6	19036	22143.9	21124.1	20543.8	21743.3	26970.7	21239.9	89011.8	80530	77561.7	101883	100734	94688.5	98658.2	88256.4	79730.4	77162.2	93860.6	76170.5	121465	156247	86258.7	161527	86101.5	168414	94789.2	188166	97582.2	171193		[M+H-2H2O]+ 224.14	134	50	102	TRUE	TRUE
508	M189T291	189.123	189.119	189.125	290.568	283.509	299.145	46	43	2764	2637.42	2326.74	5239.81	4182.52	4319.89	4593.22	1051	2986.59	4434.78	4978.35	2552.9	2428.49	2685.59	5580.63	4540.11	5313.34	2775.54	3974.77	2687.68	3418.45	4051.34	3556.93	8465.51	15085.7	18058.2	15719.8	9838.26	10113.8	12002.9	14217.9	9616.86	13412.6			95	7	50	FALSE	TRUE
509	M189T507	189.134	189.133	189.135	507.207	502.784	517.299	76	73	77410	22040.4	157894	3699.1	167187	27783	199732	192840	174643	27011	194529	148783	151477	137025	130376	147787	155144	149768	162925	151416	167164	155495	215861	46062	24710.3	41262.6	25052.6	44068.5	28914.3	41131.7	27267.7	44641.3	24905.2	[25][M]+		71	53	717	TRUE	FALSE
510	M189T532	189.134	189.134	189.135	532.097	517.82	553.684	134	56	11702	8528.42	80471	3462.09	35742.3	7413.6	34883.4	76111.1	42038.2	8570.23	37563.1	10672.7	55855.4	15256.4	10619	25004.4	28143.1	16344.2	22636.4	17725.5	56783.7	11373.4	40706.3	33535.8	9581.38	28116.9	7585.21	11968.9	7572.5	15497.4	9881.54	33885	11584.6			150	43	717	TRUE	TRUE
511	M189T528	189.159	189.158	189.16	528.329	522.403	563.006	104	80	5615	6312.74	20846.3	5549.64	20054.6	8767.8	19291.9	21124.5	18272.7	9044.79	23942.6	12112.7	8736.4	14115.3	14157.1	17060.7	15335.6	15213.3	14846	16587.1	11976.4	11729.8	14474.4	31040	25735	30988.2	27112.2	35811.4	28785.2	32574.9	32390.6	31793.8	26016.2			167	48	97	TRUE	FALSE
512	M190T189	190.049	190.048	190.051	189.312	179.689	202.835	83	82	131291	267987	95103.2	152045	94464.2	173991	114718	105493	126034	237381	141385	132145	135409	128167	103057	111317	119907	125202	119718	91571.9	101985	127182	113111	310839	336924	244604	378411	293474	401614	302646	441201	347296	427089	[26][M]+	[M+H]+ 189.044	40	66	301	TRUE	FALSE
513	M190T182	190.094	190.092	190.096	182.48	158.539	188.825	82	75	41927	3127.01	35826.1	5683.47	1946.42	3171.54	2230.34	3766.21	3239.88	5328.27	3685.95	5432.28	8365.15	8314.34	7967.85	5751.78	4001.02	6707.4	3788.36	6579.55	11599.4	9311.87	7444.82	4166.51	5224.82	5493.93	4515.58	6726.73	6684.49	7029.88	4049.84	4373.49	5008.54		[M+CH3CN+Na]+ 126.074 [M+CH3CN+H]+ 148.056	29	0	0	FALSE	FALSE
514	M190T135	190.13	190.129	190.131	134.917	123.929	146.857	72	66	3903	5906.05	5224.45	5145.8	12865.8	509.86	12271.4	12013.7	11674	6017.14	10838.7	24229.9	24024.8	21974.8	33516.3	48100.2	1163.72	36459	34219.2	31662.9	58640.4	14899.7	28935.7	5031.02	6911.35	5236.53	6435.47	3219.78	6535.58	5336.85	6533.22	4524.48	6225	[23][M+1]+		13	0	0	FALSE	FALSE
515	M190T161	190.13	190.129	190.132	160.709	149.867	175.644	64	63	2635	9071.62	8716.72	8623.13	7362.49	8670.6	7988.56	9114.49	9946.15	8565.47	8182.9	16776.5	11214.4	11401.4	13005.4	13253.1	14323.9	16339.2	11552.4	13072.3	12541.7	13369.6	7234.49	1118.94	4629.57	6041.69	2217.95	5164.62	6725.96	3801.62	7961.08	3159.81	2106.66	[24][M+1]+		9	1	55	TRUE	TRUE
516	M190T507	190.137	190.136	190.138	507.278	502.576	525.31	61	57	4743	1853.98	10448.5	1249.47	10937.2	1032.38	10776.6	10901.1	10704.3	1404.18	11339	8087.34	8462.9	8389.62	7486.47	8788.6	9302.9	8631.6	8088.51	9319.59	8781.65	8269.92	9439.79	3165.07	1843.89	3230.48	2223.62	3551.56	1865.21	3243.31	2045.62	2610.14	1410.28	[25][M+1]+		71	0	0	FALSE	FALSE
517	M190T526	190.162	190.158	190.163	526.166	522.008	536.504	57	55	1013	707.164	2815.85	725.195	1673.86	990.991	2256.94	2238.53	3294.05	1042.57	3644.04	1631.67	1036.99	1074.56	1482.49	1249.09	2045.9	1403.2	2419.42	1401.07	1932.16	1301.77	571.793	4285.94	3093.98	3240.97	2450.85	4617.31	4361.57	4045.06	2638.19	3697.17	3069.72			158	0	0	FALSE	FALSE
518	M191T94	191.022	191.021	191.023	94.014	89.643	107.393	87	81	2269	12463.9	17657	28701.5	15996.6	16379.4	15830.4	10470.6	13325.6	13914.9	11774.8	10533.2	11698.9	8987.01	8136.59	6098.85	10100.3	7036.5	4887.7	15938.5	14189.4	11139.8	14164.4	10882.2	7929.86	23759.7	21327.9	20753.6	7611.37	18470.6	12795.2	14305	12557.3		[M+K]+ 152.057	102	0	0	FALSE	FALSE
519	M191T301	191.038	191.036	191.04	300.952	293.521	305.803	74	71	3037	4446.63	6213.2	7164.05	7797.3	6684.45	5728.31	7341.99	5899.17	6120.94	5116.29	8042.42	7708.67	2705.12	5785.92	6475.53	7270.85	5588.25	7752.33	10944.7	9991.3	9022.74	7566.79	9176.23	11631	11501	11690.4	10667.9	10392.8	5425.11	9999.98	5895.45	5383.87		[M+K]+ 152.069 [M+H]+ 190.033	23	6	13	TRUE	TRUE
520	M191T375	191.039	191.036	191.041	375.181	368.68	392.951	67	59	4641	482.972	461.979	445.437	455.206	534.312	434.17	435.564	352.18	413.786	657.109	7587.55	7638.04	7575.4	7392.79	9398.03	9296.61	11029.6	9685.8	8850.22	7164.39	8543.19	7573.19	3034.6	1310.33	2839.19	1202.05	3433.58	1201.11	2500.24	1052.53	2655.52	987.524		[M+Na]+ 168.052	34	5	6	FALSE	FALSE
521	M191T258	191.038	191.038	191.039	257.723	247.577	261.355	63	63	3702	12445.5	15512.4	20466	14775.2	17138	15707.6	17527.5	13292.6	15338.4	11772.6	6998.2	6496.01	5941.72	5198.92	5295.68	5925.81	4032.79	5672.48	7480.67	6402.09	7193.15	6434.12	3298.79	4683.48	4334.07	5836.17	3733.34	5485.09	4214.05	5007.02	3153.73	5134.91			35	0	0	FALSE	FALSE
522	M191T189	191.053	191.052	191.055	189.405	180.029	192.278	68	68	11431	18304	8387.67	11960.1	8143.91	12645.7	9816.36	8346.35	12563.6	16802.3	11789.9	9583.67	9159.24	10179.7	8246.95	8591.41	9206.62	11208.1	8842.91	6704.2	7878.57	10275	9092.91	24674.1	28350.4	17814.8	29658.4	20568.5	27420.7	22909	29278.9	25557.2	30623.1	[26][M+1]+		40	0	0	FALSE	FALSE
523	M191T324	191.054	191.053	191.056	323.51	321.714	326.159	57	57	4657	2286.68	1644.95	1827.1	2142.48	2623.32	2044.7	1475.37	2231.01	2239.53	2156.51	2873.3	3522.02	3479.82	3332.32	3592.54	3547.89	3828.41	3855.34	3175.64	4245.76	3121.93	3099.24	4861.1	1073.2	3283.88	1641.02	3680.03	1622.29	5056.02	1819.37	4868.84	2261.88			45	7	2	FALSE	FALSE
524	M191T182	191.069	191.068	191.071	181.843	164.784	186.789	47	46	8203	16902.6	10681.8	12527.8	10930	456.651	12314	11740.5	14209.5	15180.2	13713.2	10499.9	3586.53	22793.9	18586.6	22696.8	5865.28	22999.2	5086.53	19848.4	21667.7	6165.4	2813.43	8344.02	50794.4	7554.02	48426.7	7484.74	4973.1	35789.7	47988.1	6589.98	6841.46		[M+H]+ 190.066	29	0	0	FALSE	FALSE
525	M191T36	191.106	191.104	191.108	36.435	27.965	60.538	67	59	3417	3032.34	3355.08	10558.3	8408.9	2127.94	8884.44	9347.52	9237.31	4388.61	8603.78	8091.2	9657.27	8233.25	16115.1	12428.5	6920.28	9115.25	7287.84	8067.79	9486.49	15538.9	14537.5	15479.5	13693.4	14796.4	13242.8	16570.2	15180.4	10152.2	16214.3	11450.6	17727.2		[M+H]+ 190.104	1	0	0	FALSE	FALSE
526	M191T315	191.102	191.101	191.111	315.326	301.141	325.088	71	62	1404	2496.53	2890.03	1949.77	2608.76	1758.26	1802	2467.09	2219.02	2221.77	3322.31	1305.01	1109.55	1795.73	1507.43	2724.34	1465.04	1601.1	1635.68	1162.08	947.763	2697.84	1693.1	3927.1	3395.31	3247.98	3332.8	4591.38	3149.24	4256.03	3765.19	4311.23	3411.14			68	2	16	FALSE	TRUE
527	M191T163	191.142	191.142	191.143	163.216	155.069	176.768	92	82	24064	71137.8	69072.7	89384.6	62649.1	72517.8	77602.8	53926.8	75250.4	80404.3	58209.6	70220	6186.18	131497	137203	191336	137582	140491	131251	129535	122608	132600	125073	8923.92	11241.3	68132.6	18687.8	51162.4	13376.8	55045.7	11139.6	60922.8	98567.8	[24][M+2]+		9	71	98	TRUE	FALSE
528	M192T328	191.982	191.98	191.983	327.991	325.885	339.855	105	73	4039	3358.05	3953.2	3657.68	1706.07	1011.45	532.378	4149.7	4495.19	2835.54	3457.94	6626.83	4449.99	5800.76	6339.12	6136.74	6169.8	6266.24	5582.56	8037.88	7393.09	6879.6	4715.6	18820.2	28338.2	17618.2	25396.6	18578.6	23697.7	18350.1	28609.1	18376.2	28464.1			138	7	3	FALSE	FALSE
529	M192T399	192.023	192.022	192.024	398.979	389.12	405.263	54	54	902	607.251	845.505	623.83	440.471	712.661	1162.53	535.826	563.226	412.078	257.996	748.813	694.824	705.634	589.744	666.038	969.715	887.8	704.53	686.827	714.713	828.776	790.215	1466.61	1636.25	1980.32	2228.88	247.299	1487.3	1473.37	1357.35	880.092	1504.47		[M+2Na-H]+ 147.054	67	0	0	FALSE	FALSE
530	M192T32	192.101	192.1	192.102	32.216	26.065	44.925	83	78	20846	3700.12	28394.5	4381.48	1679.6	2746.22	2009.69	26303	1624.59	1417.2	1373.46	48967.5	54385.2	48507.4	64201.7	56325.4	54095	53957.1	46539.1	67183.9	63454.5	54496	62896.4	8661.45	9916.06	3238.3	11214.7	2322.59	9888.08	3097.72	9563.86	7242.11	10159.6		[M+Na]+ 169.112 [M+H]+ 191.095	3	0	0	FALSE	FALSE
531	M192T163	192.146	192.144	192.147	163.33	142.066	183.402	81	77	3853	8460.12	12810.1	7956.6	10128.5	9643.85	9186.4	9089.93	6311.19	10135	7860.49	17761.8	16209.2	18530	18303.2	18331.9	21934.9	24007.9	17102.9	16658.3	11715.8	6835.32	20299.6	8070.38	7996.79	9346.42	14280.5	7328.19	8473.12	6795.12	8881.51	6344.3	2655.25	[24][M+3]+		9	0	0	FALSE	FALSE
532	M193T262	192.552	192.55	192.557	261.8	255.891	265.259	47	47	1527	645.004	1228.8	2449.25	1945.3	2010.19	1362.63	1731.54	1080.97	842.461	740.128	1006.86	598.184	946.133	1388.54	1363.73	1022.57	551.585	1346.31	1641.7	1607.78	1170.54	1169.4	2666.7	4167.53	4658.15	3227.34	3827.9	3602.05	3045.92	3557.59	3322.79	2561			74	0	0	FALSE	FALSE
533	M193T332	192.906	192.904	192.907	331.683	329.639	339.063	74	74	623	905.627	1030.45	1045.5	1079.09	773.324	1045.56	798.944	965.05	315.076	474.796	2024.88	1842.29	1552.74	2500.41	2265.68	2446.61	2435.85	2305.97	2147.35	2110.61	2035.59	1795.39	2164.5	2361.91	2393.92	2262.2	2237.69	1901.45	2450.34	1738.89	2212.84	1884.56		[M+K]+ 153.945 [M+H-H20]+ 209.913	89	0	0	FALSE	FALSE
534	M193T345	193.07	193.069	193.081	345.09	339.518	367.138	75	73	2627	1752.58	3254.1	2754.78	3778.69	4541.92	3920.07	2952.27	3749.84	3007.6	4631.61	7402.84	6990.43	6800.68	8690.8	8943.12	9412.68	11133.3	9189.9	7341.44	7915.12	7374.33	7351	1142.73	1956.74	3155.76	2555.56	1613.79	1997.86	2334.12	1887.61	1532.01	2327.12			54	8	12	FALSE	FALSE
535	M193T41	193.085	193.082	193.087	40.551	30.789	47.293	55	52	4117	11612.5	18826.3	13812.8	16763.5	14201.9	15250.5	17529.1	18841.2	14135.1	18873.4	21438.8	3864.02	7177.37	8604.67	5348	4327.14	3614.46	19781.9	23698.9	22484.9	24145.5	8878.23	21886.3	16994	27761	18245.4	28811.8	16146	26651.5	25768.9	23635.1	16015.1			2	0	0	FALSE	FALSE
536	M193T197	193.085	193.084	193.087	197.15	183.352	215.392	50	44	2797	5017.21	5048.64	4170.15	5653	4455.46	5785.56	5316.53	6805.71	447.219	6135.56	8309.29	7725.4	7904.56	7639.65	9468.74	9052.85	12188.7	8949.28	12729	7755.33	10543.3	8463.36	6217.36	5424.02	6278.47	5670.07	6687.63	5617.52	7040.01	5916.3	6591.85	5668.19		[M+Na]+ 170.101 [M+H]+ 192.083	122	0	0	FALSE	FALSE
537	M193T163	193.085	193.083	193.088	162.924	149.115	182.467	49	42	4424	7234.51	6177.2	15200.2	8891.49	11346.8	6625.88	8561.63	7903.12	8213.66	8511.92	11265	10968.2	10395.2	10810.1	12747.9	12930	13153.9	20433.3	8782.82	11602.5	9187.14	11503.5	25480.3	5556.07	20140.1	15701	24274.5	15107.4	25343.5	14912.3	26656.8	11921.4			9	2	331	TRUE	FALSE
538	M193T33	193.103	193.1	193.106	33.28	29.83	57.548	64	56	5300	14731	17907.7	16296.2	15165.7	12563.7	14389.6	15795.5	17516.2	12972.7	17460	16065.6	6915.81	5020.73	12616.2	11149.9	12604.1	14206.6	14431.4	7840.63	11736.3	29398.2	10930.3	14706.8	3011.29	14932	11177.6	14931.1	10612.1	14143.7	13590.9	13222.9	10533.6			3	0	0	FALSE	FALSE
539	M193T94	193.158	193.157	193.159	93.509	86.275	100.234	69	65	16648	4685.56	11592.9	7320.98	2985.32	3846.13	9318.8	4035.14	4083.39	6171.99	10120.2	104961	91364.2	84799.5	104719	103031	109096	113269	106464	111741	91171.3	101064	106174	7566.75	5023.96	7172.39	8846.29	7731.63	9322.46	7268.01	9444.57	7349.37	9540.67	[27][M]+	[M+H-H20]+ 210.163	102	50	241	TRUE	FALSE
540	M193T193	193.158	193.158	193.159	193.289	184.866	199.545	49	46	6466	3107.27	2994.13	2663.51	2517.74	2841.05	2992.8	2856.38	2581.19	2996	3334.65	16802.2	19400.9	14885.7	16286	24719.5	67491.9	25496.1	19718.7	19602	11744.8	19634.2	20643	11986.9	29649.8	11898.3	15565.5	13687.5	27119.1	15685.2	27699.7	8520.21	24935.4		[M+H-H20]+ 210.164	39	8	78	TRUE	TRUE
541	M193T173	193.158	193.157	193.159	172.76	155.483	183.079	65	52	6899	9613.97	9049.82	7652.23	10220.8	8014.73	8231.3	8487.5	9729.79	7551.08	4196.99	32291.9	23186.1	19066.8	18565	12927.7	24672.2	25489.1	35392.3	18230.2	38443.6	19556.7	58621.9	24822.1	45330	33935	32317.4	25725.6	47553	25309.6	12621.8	15284.8	8665.25		[M+H]+ 192.153	10	35	241	TRUE	TRUE
542	M194T36	193.509	193.506	193.516	36.152	27.112	48.25	52	49	5810	29.1291	104.941	156.425	100.983	47.8173	98.434	73.5566	141.051	136.516	163.579	18111.3	11061.3	10452.9	20844.9	10664	9510.78	10671.7	16126.4	7752.82	7205.41	13956.7	18580.4	256.878	1227.36	133.209	1244.62	716.438	440.549	289.689	1785.98	117.58	1843.64			1	0	0	FALSE	FALSE
543	M194T328	193.997	193.995	193.999	327.891	325.425	337.168	76	60	1907	5650.28	5301.73	4322.83	3752.13	4695.28	5963.03	5137.65	4684.72	6103.55	5897.12	2473.63	2675.25	3268.82	3321.21	3434.47	3855.06	3430.35	3133.74	2807.33	2384.1	3091.84	3643.99	5907.57	6251.53	7834.74	6003.19	6630.55	5544.47	6246.37	5240.65	6263.99	6994.43			138	1	1	TRUE	FALSE
544	M194T321	194.102	194.1	194.104	321.177	302.887	330.649	82	71	966685	3.43552e+06	3.20944e+06	291173	3.45083e+06	2.94074e+06	3.96352e+06	4.13031e+06	3.98635e+06	3.24632e+06	4.25334e+06	778650	791573	851120	669639	684646	858513	895204	825541	613760	720103	783691	849696	1537.39	2016.74	1385.65	2410.61	1034.34	3001.93	1643.78	2693.24	2067.43	2295.38			5	21	2987	TRUE	FALSE
545	M194T34	194.117	194.116	194.118	33.635	27.345	48.162	88	82	2031656	34150	20870.8	36577.3	20214.9	34796.2	22220.4	21529.4	21722.7	36845.6	20994.8	8.03643e+06	7.65894e+06	8.25413e+06	8.23248e+06	7.70364e+06	8.27477e+06	7.27048e+06	7.06973e+06	8.43605e+06	9.43178e+06	8.73058e+06	8.35161e+06	24298.8	207154	21377.2	221491	20643.5	254454	25029.8	252674	28103.6	234097	[28][M]+		4	68	1630	TRUE	FALSE
546	M194T192	194.117	194.116	194.119	192.156	182.025	196.468	74	74	136210	7120.7	8970.6	5416.41	6894.59	2058.24	8084.73	1111.62	4544.89	352.602	8702.02	307498	310976	313292	313630	304853	320479	299342	309355	233029	255771	307006	297091	1242.17	6987.47	1816.99	7212.26	1008.82	7189.69	863.443	7118.19	1503.65	7926.41	[29][M]+	[M+K]+ 155.153 [M+H]+ 193.109	39	54	281	TRUE	FALSE
547	M194T141	194.117	194.116	194.118	141.394	119.49	156.312	67	41	46813	3851.02	3241.5	3176.2	3129.35	2902.04	3563.97	3278.71	4128.06	3662.1	3841.91	126110	87492.5	69105.6	37382.4	38101	38872	42759.1	36669.5	57567.9	50448.3	50452	85870.5	1714.01	1678.34	1712.99	1411.6	1610.68	1986.41	1910.18	1795.95	1912.76	2036.51		[M+H-2H2O]+ 229.125	38	39	953	TRUE	TRUE
548	M194T89	194.117	194.116	194.118	88.522	69.433	104.714	73	49	230876	3004.9	3423.25	2512.11	3016.76	2658.38	3405.25	2870.09	3356.65	2736.94	3102.55	190194	364094	799661	282038	171627	186569	202100	205061	431975	1.0888e+06	325557	401634	1896.45	2329.79	1966.38	2090.02	2174.49	3087.51	1927.29	3004.32	2084.9	3271.56			28	48	1630	TRUE	TRUE
549	M194T322	194.138	194.133	194.139	322.364	321.009	342.043	65	64	966685	1.17786e+06	2.13617e+06	1.31259e+06	2.55743e+06	1.26872e+06	619722	2.11659e+06	2.82345e+06	2.11411e+06	655502	670673	694626	723157	583445	626535	666086	948.499	612407	551.543	650136	1124.04	1220.24	2419.55	1549.83	1483.96	1960.29	1979.18	2360.12	2016.83	2490.27	2025.75	1864.74			5	11	2987	TRUE	FALSE
550	M194T93	194.161	194.159	194.163	93.229	86.283	105.003	46	45	2905	1823.58	2816.65	2039.49	2483.68	1899.72	2700.08	2245.2	2718.55	1788.28	2443.89	10735	5970.54	8773.69	11366.8	12008.4	10511	11708.5	10498.2	10564.8	7621.79	11210.6	5646.05	1032.7	1272.2	1036.57	1415.22	1167.95	1657.88	1200.68	1334.25	1271.51	1182.14	[27][M+1]+		102	0	0	FALSE	FALSE
551	M195T325	194.945	194.943	194.947	325.384	323.605	343.029	86	66	1037	2192.12	1807.2	1807.86	2407.78	1472.15	2251.91	2744.13	2561.89	1887.14	2324.49	1401.45	1390.95	1624.84	2008.38	1857.48	2052.14	1978.99	2114.46	1209.61	1547.79	1654.83	1373.87	1737.61	1249.85	1851.63	1421.65	1804.7	1330.88	1724.34	1628.59	1639.5	1522.55			96	0	0	FALSE	FALSE
552	M195T247	195.086	195.085	195.087	246.732	239.368	256.072	80	80	72227	7288.68	6048.95	9218.85	7031.58	7780.36	7322.94	7395.54	8610.93	13078.6	8779.78	227894	201931	210945	251333	259801	249597	273934	266812	213930	231775	252422	210640	259127	225326	280502	223474	267664	159399	262242	226693	260795	216061	[30][M]+	[M+H]+ 194.08	15	50	45	TRUE	FALSE
553	M195T377	195.086	195.084	195.087	376.577	367.068	400.313	84	72	2040	5731	4085.05	4334.21	4995.16	4019.7	5509.35	6484.53	6386.09	5708.61	7027.07	3844.85	3232.78	5118.54	3447.05	8392.02	4399.47	6490.39	4701.41	3740.71	9760.64	4916.65	4401.34	7918.35	5149.59	7055.2	4814.49	15890.5	7010.26	6867.41	5637.68	10366	5216.83			34	6	6	FALSE	TRUE
554	M195T281	195.086	195.085	195.087	281.15	273.064	289.021	48	41	9864	5275.7	3017.75	2822.37	3092.36	3802.39	3486.41	4305.11	3808.3	3490.18	3084.57	12426	12791.8	10792.9	11592.4	60400.2	11320.2	59800.6	15948	60075.8	18414.7	17814.5	15468.3	15944.6	12192.5	14738.2	11567.6	14694.5	6655.98	32911.1	6826.13	44804.1	11728.9			155	33	45	TRUE	TRUE
555	M195T302	195.086	195.084	195.087	302.154	297.987	321.677	45	43	2308	3432.38	2501.58	2949.42	2215.11	2436.39	3052.2	2668.85	3075.25	2897.36	2972.97	7044.4	7404.23	7084.75	6561.84	7574.1	7751.71	7748.74	5943.03	6866.63	7546.46	8455.43	8038.15	3074.61	10975.3	7514.66	10385.7	9635.95	10628.5	8106.36	10871.5	7669.5	9420.8		[M+H]+ 194.078	23	18	99	TRUE	TRUE
556	M195T34	195.12	195.118	195.121	33.6205	27.345	48.162	76	74	656045	22554.8	4784.86	25764.4	3271.55	19943.9	1516.96	33014.6	1935.45	6385.86	36623.7	751371	756798	715645	713446	695808	794682	796816	724232	788489	853427	813142	768885	31989.5	27643.4	6185.82	31913.4	28839.6	28918.3	31887	26975.2	5131.61	25014.4	[28][M+1]+		4	4	95	TRUE	FALSE
557	M195T192	195.12	195.118	195.121	192.308	174.601	196.468	64	62	11830	7526.67	8565.01	6313.08	7317.06	6159.08	9293.2	6846.5	6236.79	6936.97	9157.22	26248.4	26923.1	26043.7	31306.7	29263.2	28856.8	28370.8	27407.7	21615.3	21378.9	25020.7	28950.2	6083.51	8343.15	5770.51	8554	6240.48	8097.97	6507.7	8522.92	5619.01	8466.32	[29][M+1]+		39	0	0	FALSE	FALSE
558	M196T415	195.991	195.988	195.993	414.544	405.84	432.569	69	65	770	1699.56	1419.39	1551.49	1809.17	1537.11	1295.09	1081.85	2105.86	1393.41	890.822	1567.05	1145.76	841.682	811.185	2360.52	1149.89	827.131	2055.87	1622.21	2360.61	2404.22	2083.18	2194.88	1211.36	1811.02	2171.08	1325.2	1314.3	1626.7	1473.84	1359.16	1654.16		[M+3Na-2H]+ 129.033 [M+2Na-H]+ 151.015	41	0	0	FALSE	FALSE
559	M196T382	196.059	196.058	196.061	382.421	372.781	387.669	71	71	842	1147.2	994.763	1053.5	1094.55	1300.7	1095.95	968.545	1093.05	289.964	1183.74	905.594	848.975	793.905	1413.57	1308.13	1005.21	975.238	1122.59	1251.19	981.91	923.514	704.704	1511.58	2069.27	1221.22	2403.93	1667.94	2068.38	1329.48	2396.15	1128.72	1715.21		[M+CH3CN+Na]+ 132.05	80	0	0	FALSE	FALSE
560	M196T246	196.09	196.086	196.096	246.283	239.736	253.259	70	68	5832	1012.6	1127.2	719.303	593.491	1097.81	801.048	938.997	1158.48	1113.41	1277.31	15797.1	16235.6	12454.1	18184.2	16195.6	15802.4	19703.3	13787.4	15947.2	15872.1	14355.7	17138.3	17802.1	13197.4	17401.9	14813.2	14700.4	11860.5	15500.5	12834.8	15839.4	15575.9	[30][M+1]+		15	10	10	FALSE	FALSE
561	M196T42	196.096	196.095	196.101	41.607	34.22	52.356	75	71	83202	6743.38	5840.28	6868.43	2554.76	1105.6	6406.83	6314.06	6465.06	6388.55	5953.83	61677	61556.7	60282.1	61887.4	49210.7	52014.5	70358.9	55888.1	71892.8	66639.7	69393.6	52884.9	524.426	6467.61	1835.78	4126.66	8131.38	4217.29	3738.15	4914.68	8546.27	9670.5			7	26	264	TRUE	FALSE
562	M196T64	196.096	196.095	196.099	64.1955	54.869	69.37	48	45	13522	1761.52	5882.7	1497.21	5490.76	1744.2	4298.21	1585.13	4929.76	4041.07	4929.27	27110.7	24577.3	27027.3	32232.8	33999.6	24019.3	33527.1	46735.9	29611	19086.9	31071.6	44229.4	980.88	4845.59	3268.74	5105.38	4736.87	6921.57	3726.49	2998.61	3909.47	4373.57		[M+NH4]+ 178.062	77	33	264	TRUE	TRUE
563	M196T37	196.122	196.12	196.133	36.546	27.345	63.649	83	71	16062	1416.29	5691.96	5913.57	5865.8	961.019	6324.65	6350.25	6215.46	6909.37	6383.15	55652.2	50039.7	58945	65591.3	59478.9	54361.4	63375.2	57446.9	65053.4	63749.5	58185.7	67863.9	1751.49	3223.47	6909.1	2567.46	7984.22	3299.55	915.344	4384.4	8175.02	2627.95		[M+H]+ 195.121	1	2	138	TRUE	FALSE
564	M196T192	196.122	196.121	196.131	192.358	189.934	206.223	53	53	1535	1905.43	1639.31	1356.9	1526.65	1241.64	1237.07	1512.05	1670.18	1670.18	1311.33	3132.07	2356.14	2132.1	2842.76	2667.65	2552.5	3713.04	2857.24	3086.42	2367.41	2345.02	2674.98	1836.47	1996.38	1252.76	1247.68	1218.38	1234.91	2009.52	1284.61	862.352	885.323	[29][M+2]+		39	4	56	TRUE	TRUE
565	M197T384	196.981	196.979	196.983	384.116	374.171	389.607	50	50	363	752.964	690.922	852.473	700.045	868.786	829.18	756.429	757.986	797.749	588.803	1163.53	774.836	765.16	734.137	747.976	937.622	836.298	670.141	363.58	757.106	885.575	914.233	792.952	546.427	643.074	391.611	559.941	571.427	741.069	678.169	822.992	523.141			208	0	0	FALSE	FALSE
566	M197T357	197.041	197.04	197.043	357.039	351.612	360.498	59	59	972	1062.51	708.102	1308.6	1001.54	1105.89	730.664	742.191	802.998	1382.64	688.676	1024.15	991.823	880.496	1342.14	1247.69	1531.53	1581.83	1280.91	1192.74	1175.65	875.188	1227.83	539.34	362.914	746.32	412.741	630.787	341.257	452.072	235.469	534.842	400.895		[M+H]+ 196.031 [M+H-H20]+ 214.045	97	0	0	FALSE	FALSE
567	M197T174	197.08	197.078	197.082	173.617	151.408	192.415	64	58	2050	3714.07	5393	4042.86	5683.33	3741.07	5420.45	4915.33	4378.05	1697.37	4947.1	4879.06	12593.7	8718.08	3652.66	3566.05	4474.17	5938.11	5904.77	3619.49	2055.16	4527.57	3311.43	2059.39	4510.71	2549.24	2636.57	2060.21	13274.3	6053.33	2116.54	2572.67	1389.51		[M+K]+ 158.113	10	0	0	FALSE	FALSE
568	M197T39	197.08	197.077	197.082	38.622	30.905	50.648	44	43	19677	7929.97	9755.9	9748.69	10224	8721.64	7933.16	9018.22	10324.5	6199	8231.85	39276.1	37917.1	35352	37977.8	1827.64	34847.3	37531.4	4337.57	3424.11	37483.3	37454.8	38975.2	8970.11	2743.26	9224.83	4407.12	80964.7	3499.56	7566.18	6521.48	3566.52	3415.34		[M+H]+ 196.083	2	0	0	FALSE	FALSE
569	M197T247	197.09	197.086	197.101	246.513	215.739	252.097	61	58	1843	1325.39	2032.6	1207	2106.6	2209.67	6410.87	1246.88	2244.36	1599.13	943.763	1867.69	2361.03	4093.7	3635.6	2124.47	3237.83	2077.63	3822.57	3551.1	2322.71	4763.52	4709.9	1379.7	2167.12	2071.36	2769.56	2614.13	1502.9	2432.92	2707.13	3656.3	3873.97	[30][M+2]+		15	0	0	FALSE	FALSE
570	M197T41	197.097	197.094	197.101	40.8195	27.423	69.805	62	54	24278	13109.9	14694.7	12783.9	14231.5	10920	12926.2	13296.9	15658.3	13024.2	13372	19567.2	11343.4	8667.55	10689.6	17717.2	14265.2	12950.2	4080.49	16569	24392.7	37418.8	14828	65476.4	79262.2	79672.8	6979.49	903.916	5023.34	82596.2	72737.1	74167.8	74357.2		[M+H]+ 196.083	2	0	0	FALSE	FALSE
571	M197T360	197.089	197.088	197.101	359.677	357.325	372.201	49	47	1028	2901.94	2358.28	2283.99	2808.18	2146.85	2259.76	2577.86	2836.25	1580.21	2071.21	1826.72	1415.4	1403.77	1521.09	1743.56	1343.96	1755.34	1138.67	1252.62	1642.15	1167.92	1065.63	469.291	1016.4	1300.52	991.635	1129.83	957.417	1261	957.6	1077.88	899.988			144	0	0	FALSE	FALSE
572	M197T108	197.117	197.116	197.117	108.376	86.781	112.157	72	71	6567	7321.18	24796.6	25589.9	30191.3	25137.2	15428.3	22841	17555.7	24676.3	5972.18	44745.9	39645.8	38030.2	56138.8	54355.3	56130.8	56895	44696.9	46835.9	36156.8	46626.9	40267.4	26182.2	56653.6	32517.7	64065.8	38472.4	54937.5	30470	61681	41334	55935.7	[31][M]+	[M+H]+ 196.112	134	57	75	TRUE	FALSE
573	M197T36	197.132	197.124	197.133	35.701	27.921	65.856	97	69	20190	411.174	5622.45	10795.4	12043.6	5245.39	6261.95	2688.32	4588.56	2600.42	11394.1	35928.5	22821.8	20230.7	21052.9	28730.1	33500.1	37440.1	31065	17124.9	23641.1	43988.5	20752.8	9976.61	14877.3	77943.5	72037.3	14172	70621.2	15116.8	15971.2	72249.8	12233.2			1	2	85	TRUE	TRUE
574	M198T314	198.006	198.004	198.008	314.083	312.117	318.641	61	61	669	944.862	1111.22	1112.63	1144.34	1954.33	1570.61	1149.75	1461.97	842.024	1005.5	2264.3	2046.45	2370.29	1851.63	2230.19	961.283	2197.92	1685	2606.76	2595	2110.1	2310.4	3628.57	1183.34	3972.74	1177.12	4152.41	2253.07	4226.5	2027.44	4096.15	1944.94			66	0	0	FALSE	FALSE
575	M198T415	198.024	198.023	198.025	414.584	404.449	432.25	83	74	1250	1296.38	2236	3946.51	2028.26	1710.6	2341.66	5739.35	2992.33	1114.8	1552.5	4863.4	3006.35	2136.1	16187.8	13839.7	6742.38	4363.77	4326.49	6870.21	3357.11	3414.85	5362.69	4501.22	1157.73	3526.27	5522.54	5722.26	3397.57	1849.84	1665.56	2684.57	2194.47		[M+Na]+ 175.036	41	2	8	FALSE	FALSE
576	M198T258	198.046	198.045	198.048	257.758	249.812	262.325	69	69	1608	2856.62	3023.74	3999.86	3560.44	3869.24	1577.29	2774.35	3012.41	1661.62	3766.63	3837.02	3972.6	3420.22	2465.29	1558.06	2412.27	1523.94	2406.27	4644.96	3272.07	4472.23	3893.62	1788.8	2113.64	1612.77	2119.7	1645.2	2058.58	2464.97	2095.39	1704.22	1835.55			35	0	0	FALSE	FALSE
577	M198T302	198.097	198.096	198.098	301.617	291.547	310.113	97	82	5469	43066.4	40332.5	45350.1	40411.1	44376.5	41370.8	41789.6	39130.9	18002.5	43683.1	44559.1	44522.5	42104.5	53486.7	47690.8	24448.5	30595.2	51178.2	18228.6	22667.1	24765.3	43214.9	44357	24527.4	48271.5	24479.1	47380	53268.4	49718.1	55034.1	49726.8	24049.8	[32][M]+	[M+H]+ 197.091	23	11	30	FALSE	FALSE
578	M198T254	198.096	198.096	198.097	254.458	243.522	259.8	64	64	3235	20114.7	29162.6	20107	25011.8	25118.3	26037.6	23535.6	28166.7	21590.7	22513.1	15459.1	13645.9	16168.3	20085.6	24188.8	21208.3	24052.2	18050.9	15153.6	15106.3	17112.8	16668.3	14905.8	22105.4	19024.5	20489	19217.8	15268.1	17736.4	17178.3	15356.6	17972.4			70	8	17	TRUE	TRUE
579	M198T389	198.096	198.095	198.099	389.179	379.341	394.8	73	73	1709	2474.52	1634.05	2287.31	2090.75	1142.46	2127.73	1146.5	2134.26	2275.73	1066.93	1141.93	1559.66	1519.59	2595.5	1334.05	2398.51	2196.07	2095.81	1709.4	1271.36	1959.62	1934.04	1251.74	2667.78	1854.62	2407.01	1990.31	2227.08	1755.3	1240.42	1885.1	1585.18		[M+NH4]+ 180.062	64	6	19	FALSE	TRUE
580	M198T111	198.12	198.111	198.121	110.648	104.132	117.968	42	42	1219	1498.3	4195	3862.7	3841.38	3639.05	3949.9	4063.3	4343.89	2083.16	4092.48	5932.69	6829.21	3744.75	8907.1	7900.3	7598.67	6944.62	4921	6849.39	4515.03	8292.34	5699.93	1385.38	3649.4	5589.88	6720.07	3207.91	5437.73	1098.29	6521.59	2056.05	6687.89	[31][M+1]+		134	0	0	FALSE	FALSE
581	M198T356	198.123	198.122	198.124	356.369	354.395	384.436	61	55	5180	18451.9	9667.92	18251.6	10926	18025.8	11075.5	10355.4	11235.5	18366.6	11133.5	2327.74	2058.54	2128.7	2976.45	2070.22	1935.05	1863.68	1798.19	1446.76	1570.58	1776.35	2490.35	2508.74	3335.31	1924.78	3683.77	1736.61	3288.71	4575.7	4160.16	1959.84	3707.51		[M+H]+ 197.116	97	13	18	FALSE	FALSE
582	M198T35	198.135	198.132	198.138	35.211	30.675	63.877	45	43	2593	3706.44	4272.69	3733.26	3968.54	4497.09	4355.27	3841.07	4749.93	4459.74	4316.11	7397.77	5355.67	6063.62	10812.7	4475.03	7302.81	5667.2	5941.63	3772.53	12138.9	3617.4	4328.08	10616.2	4044.88	743.023	3285.85	1518.95	12251	12921.5	12622.6	13011.8	10729.8		[M+H-H20]+ 215.144	1	0	0	FALSE	FALSE
583	M199T195	199.059	199.058	199.06	194.512	184.001	213.516	77	75	8139	2854.81	1883.21	377.739	2077.05	280.317	799.08	2095.8	3056.37	2719.92	2426.82	9006.53	7620.15	8567.33	7119.4	8989.62	9638.88	10494.2	8651.45	6582.3	7013.45	7931.29	8524.36	3497.15	2633.24	2790.18	2160.68	3406.82	1987.26	3535.15	2489.47	3735.16	2624.06			18	16	55	TRUE	FALSE
584	M199T258	199.063	199.054	199.064	258.114	245.362	261.865	48	48	1771	1743.53	2744.28	2495.69	2724.18	963.357	1893.2	2169.04	2483.81	1707.35	1262.51	2294.19	2080.21	1889.18	5459.31	4031.57	5289.24	3329.09	3810.8	3636.04	2299.3	2153.26	1906.09	1638.56	2071.96	2604.33	1660.94	2471.27	938.06	2107.94	2417.81	755.379	2297.86			35	11	44	TRUE	TRUE
585	M199T324	199.059	199.057	199.061	323.756	312.037	326.035	41	41	1262	1765.18	2055.65	2219.44	2285.21	1619.53	1393.58	2695.68	2255.82	2097	1508.71	568.844	1028.13	555.571	726.104	552.762	748.265	707.036	962.585	1139.43	847.06	1177.06	1501.07	850.668	1533.22	1072.1	1444.13	856.441	1593.5	929.421	1858.17	985.621	1453.55			45	0	0	FALSE	FALSE
586	M199T300	199.1	199.098	199.102	300.439	293.367	307.587	55	53	806	3822.21	4492.19	2706.89	4233.54	3530.3	1635.14	1453.42	1766.67	3522.89	2753.1	2567.22	1872.79	3576.65	2589.17	2359.25	4797.42	4598.3	1948.04	917.235	2475.73	2321.79	2243.35	3303.43	3856.22	1690.08	2132.59	3708.7	3677.43	2246.52	3681.88	3260.62	3587.99	[32][M+1]+		23	0	0	FALSE	FALSE
587	M199T35	199.111	199.11	199.113	35.1995	28.42	52.368	90	75	7177	3004.82	10251	6944.39	881.042	7352.16	8624.53	8503.25	8997.63	997.493	7833.54	36395.4	20590.7	36952.5	34994.6	21381.8	44542	35531.6	16199.7	34034.1	21255.2	21211.7	22688.7	1732.35	15068.3	4664.36	10062.6	4747.54	14719.1	3737.18	11889.3	7746.47	10409.1		[M+Na]+ 176.124	1	2	50	TRUE	FALSE
588	M199T40	199.147	199.144	199.149	40.365	26.495	44.774	53	52	5810	3105.99	4134.34	11611.9	10722.5	9573.51	3179.17	1566.07	4284.63	5584.59	4276.07	13415.5	8155.79	6363.94	37694.8	6761.92	12513.1	36022.1	34714.2	38489.9	13480.5	9472.49	3005.37	14791.6	41381.6	10290.1	14714.9	19005.6	32674.3	13798.8	42590.8	4239.27	16939		[M+CH3COO+2H]+ 138.109	2	0	0	FALSE	FALSE
589	M200T261	199.56	199.556	199.565	261.312	255.516	265.868	44	44	1150	393.023	613.288	340.814	886.575	554.409	611.618	748.848	371.621	445.712	370.539	1541.5	1024.81	822.953	1841.37	1892.23	2336.91	1474.67	1052.17	1901.16	2452.05	1869.62	1548.36	2009.09	1980.82	3419.14	2103.31	3100.19	2790.84	2387.12	1558.18	2061.84	1787.01			74	0	0	FALSE	FALSE
590	M200T303	200.044	200.043	200.045	302.59	292.751	306.245	79	72	15535	15256	20159.9	17264.1	19463.1	16095.8	15134.2	19859.6	18343.9	17122	14265	27339.6	27296.9	24147.8	17213.6	25335.6	25706.8	23876.9	19794.5	31099.5	34719.1	29295.8	29809.2	27554.2	44229.6	39574	45175	34342.6	34733.3	30320.4	30035.5	30496.3	29420.6	[33][M]2+		23	7	15	TRUE	FALSE
591	M200T258	200.044	200.043	200.045	257.805	247.582	261.355	82	82	41680	128816	181881	217474	175935	183805	165245	183751	141162	156580	112608	71193.6	62502.5	56458.9	57956.9	58348.3	60237.4	47192.4	59786.2	74913.2	70073.1	75035.5	70572.4	34226.7	52849.1	44597.1	69188.3	44702.8	60637.1	40063.2	54599.1	31537.5	51747.8	[34][M]+		35	10	23	FALSE	TRUE
592	M200T53	200.054	200.05	200.057	52.668	39.426	67.258	44	41	1465	7541.39	3082.81	5857.72	3796.26	1925.49	4536.02	3703.21	7967.76	2987.43	6338.11	1419.46	4609.3	1258.49	2875.26	5492.08	5838.85	6384.7	5212.34	5906.03	5830.58	2784.32	1687.73	3291.72	6938.85	5863.11	5450.64	4737.71	6517.42	5388.95	6134.26	4637.78	5111.61		[M+3Na-2H]+ 133.095	8	0	0	FALSE	FALSE
593	M200T353	200.067	200.066	200.07	353.238	349.062	356.859	79	79	1714	1419.45	986.464	1982.27	855.882	1875.93	868.213	359.56	838.304	1445.67	1186.11	1515.43	1462.15	1532.92	1629.96	2372.03	1973.41	2190.73	1866.87	2179.12	1841.85	1506.11	1478.33	1476.01	2579.27	2168.24	2046.17	1921.1	2312.94	1688.97	2132.38	1544.57	1801.7		[M+K]+ 161.104	90	7	4	FALSE	FALSE
594	M200T37	200.115	200.111	200.118	36.559	28.881	60.25	51	46	2050	3669.87	3596.99	4611.31	3788.76	4748.6	4450.07	3286.31	3733.73	4768.04	2870.86	1944.29	1430.01	6741.04	6989.59	5460.98	4717.11	1534.46	2068.91	8913.86	8699.44	9463.39	1195.8	3612.11	838.228	3658.63	2901.4	3257.96	3453.71	3707.26	4566.09	4086.26	1292.5			1	2	37	FALSE	TRUE
595	M200T402	200.139	200.137	200.141	401.82	393.026	406.288	69	69	774	531.985	550.861	619.474	617.092	563.587	429.921	543.782	495.006	468.625	463.506	1230.06	1393.76	1612.19	1635.62	1712.6	2363.85	1755.2	1339.69	1673.36	1780.59	1539.59	1503.59	1791.63	2783.5	2547.27	2240.62	2125.79	2215.41	2700.98	2222.81	1824.74	1968.99			86	1	8	FALSE	FALSE
596	M201T258_1	200.546	200.545	200.547	257.528	247.577	261.865	72	72	6028	15997.4	22882.1	26999.4	18127.5	22730.9	20398.7	22275.6	17607.1	19347.2	15025	8381.98	6956.63	7137.61	6301.62	7774.68	8116.27	6058.17	8221.85	10533	8558.76	8414.6	8603.56	5292.77	7068.42	6191.63	8877.38	5811.87	8012.68	5483.96	7112.45	4292.07	6512.51			35	0	0	FALSE	FALSE
597	M201T303	200.545	200.545	200.547	302.513	292.964	305.878	59	51	2386	822.791	3587.79	3705.98	3193.1	3487.87	2343.94	3116.84	3629.45	2936.81	350.722	3817.73	4114.79	4259.4	3959.4	4680.25	4774.86	3624.97	3922.39	5910.45	3330.76	5368.48	4968.79	5261.87	8564.54	6371.93	9488.16	7178.11	7116.16	5862.79	6519.07	6084.71	6256.85	[33][M+1]2+		23	0	0	FALSE	FALSE
598	M201T156	200.971	200.97	200.974	155.965	150.023	159.385	46	46	1434	5586.54	9534.66	12595.4	3702.94	8674.91	6614.06	11195.1	5136.45	9006.46	5086.43	4056.97	4337.33	4399.97	15215.5	9352.43	8193.04	4974.38	5077.13	4573.61	3863.78	4633.19	4983.67	2986.67	3612.76	4259.22	5642.23	4385.3	6271.72	3280.8	6479.86	5219.69	4950.86		[M+Na]+ 177.983	46	0	0	FALSE	FALSE
599	M201T183	200.971	200.969	200.973	182.951	173.243	187.476	49	49	1709	6677.58	9141.61	6065.15	4343.03	5771.05	8302.22	6605.51	4742.63	6179.03	2945.82	2476.85	7839.43	5058.3	9723.17	8112.45	9539.46	5093.15	3302.77	4412.47	4336.54	4719.83	4711.34	5666.49	4911.62	3710.97	2754.74	4591.27	5241.45	7584.4	5981.03	1280.47	4743.97		[M+Na]+ 177.981 [M+H]+ 199.963	29	0	0	FALSE	FALSE
600	M201T258_2	201.046	201.043	201.047	257.663	247.582	261.355	59	59	1630	4569.49	6981.92	7345.33	5928.65	6586.31	4517.19	6037.69	4328.46	5289.74	4655.12	2433.03	1120.4	2462.87	1482.57	2619.53	2202.02	1122.95	2000.09	2738.89	2567.17	2217.91	1938.8	855.683	999.166	1227.5	2938.83	1442.89	3116.39	3152.91	1920.98	904.067	1826.83	[34][M+1]+		35	0	0	FALSE	FALSE
601	M201T404	201.086	201.085	201.088	403.896	396.95	413.221	74	73	7039	4047.8	4801.09	4260.77	3818.79	4579.09	4235.46	3647.63	3582.82	4112.51	3519.91	3882.22	4384.52	4283.67	5890.58	5777.76	7413.01	6236.47	4784.01	4430.42	4740.69	4313.87	4221.09	21499.1	26544.9	23970.4	23752	23117.4	23611.6	22895.5	21680.7	21264.2	20705.1			98	16	8	FALSE	FALSE
602	M201T247	201.094	201.093	201.095	247.207	240.448	258.298	73	72	8858	5302.89	5320.46	4881.15	4672.28	4928.77	4231.91	4797.06	5781.63	5879.2	5183.79	35021.7	22258.1	32533.5	28700.8	29798.6	95659.2	82073.9	41984.3	21126.8	27524.2	33889.7	23850.6	16074.5	18944.7	17746.4	19405.5	21676.6	16725.4	21621.4	13056.4	16988.3	18434.1			15	1	10	TRUE	FALSE
603	M201T36	201.09	201.087	201.092	36.0315	28.645	56.199	74	68	3417	2539.78	6074.38	3789.44	5054.67	7009.87	5927.95	1639.12	1447.82	7851.42	5469.42	11426.9	8957.59	8401.48	7882.04	6184	5958.39	8570.9	4882.43	8308.25	7825.96	26036.4	7501.99	8819.73	9076.67	15445.7	9233.27	8279.61	8756.77	14618.1	14365.3	9099.19	12012.5		[M+K]+ 162.135	1	0	0	FALSE	FALSE
604	M201T37	201.126	201.126	201.128	37.363	28.9	54.424	70	61	5468	8271.41	7189.3	8588.01	2218.25	5609.85	3407.21	6672.41	7321.29	2276.54	3129.37	31790.4	17117.5	12472.7	20216.4	25523	26354.8	9847.39	10620.7	23816.8	44630.1	15462.3	31316.2	12615.7	25135	15041	14718.6	15684.9	15477.9	20990.7	15181	13528.6	16545.5		[M+H]+ 200.12	1	10	219	TRUE	TRUE
605	M201T435	201.123	201.121	201.124	434.943	432.761	438.552	48	48	1240	1822.34	1998.04	2926.32	1735.18	1448.56	2188.56	2915.3	1694.2	2212.56	1998.68	2319.71	1833.45	1991.17	1988.98	1819.07	2794.24	2348.14	1632.21	1955.78	1950.01	1939.03	1828.55	5121.29	4527.42	7963.83	5541.44	6262.54	3936.46	5785.28	5267.07	5612.87	8380.74		[M+H]+ 200.115	43	0	0	FALSE	FALSE
606	M201T173	201.163	201.161	201.164	172.541	157.904	186.342	52	48	5709	27546.6	44633.5	27416.6	46382.8	27658.4	47536	69131.6	46267.1	31983.5	46628.3	15446	26507.4	21451.5	14028.9	25127.4	11663.6	15928.8	21676.8	22445.8	16113.6	14382.9	13949.5	12189.4	13536.6	13701.1	14593.3	17780.4	9494.04	14959.5	11533.7	15408.1	22956.5			10	9	59	TRUE	FALSE
607	M202T257	202.04	202.039	202.042	257.27	247.577	261.468	43	43	1106	1117.89	4444.91	5298.62	2650.93	4388.63	3838.74	4478.26	1858.25	2630.1	884.406	1300.62	1100.09	1315.5	884.421	1045.22	1366.33	848.838	1282.89	1812.07	775.611	1827.14	1783.95	766.584	619.972	591.675	1557.56	1058.11	1072.2	911.077	1237.18	687.32	1111.86	[34][M+2]+		35	0	0	FALSE	FALSE
608	M203T359	202.968	202.967	202.97	358.964	353.222	365.415	61	58	1184	901.529	1441	1505.27	1465.72	609.414	1064.76	867.076	280.123	355.572	556.798	804.759	832.283	892.655	569.34	1474.5	1041.43	1667.13	1557.05	1791.16	785.371	1278.88	1270.5	1667.79	764.336	2574.99	1048.36	2113.95	722.772	2037.86	810.419	1768.42	631.96		[M+K]+ 164.005	144	2	4	FALSE	TRUE
609	M203T429	202.996	202.995	202.998	429.326	427.156	440.753	81	80	1145	1847.66	2277.93	2686.69	1465.36	3081.69	2438.08	1437.14	1258.19	2247.21	1342.95	2415.88	1932.85	2003.63	6296.73	5315.78	4745.57	3246.75	3690.79	3651.7	1788.01	1373.53	2498.74	1503.69	1229.49	1234.45	1520.39	1003.25	709.712	833.389	1145.52	946.674	972.862		[M+Na]+ 180.009	78	4	4	FALSE	FALSE
610	M203T303	203.052	203.051	203.056	303.14	280.178	319.499	85	77	16608	23009.3	37741.4	42105.6	32551.2	37435.6	35878.7	35427.3	19586.4	28508.2	31074.6	53037.3	39286.4	48130.6	67989.6	57584.9	74947.8	61510.4	58521.5	61602.3	61899.7	61203.3	50973.2	58825.9	68508.4	59473.8	50357.8	57891.9	63840.7	55166.1	47154.1	40770.2	55069.1	[35][M]+	[M+K]+ 164.089	23	59	4	TRUE	TRUE
611	M203T389	203.052	203.051	203.054	388.978	378.851	393.792	77	77	2129	3483.73	1634.66	1534.17	1111.65	3660.97	3505.93	2431.33	1708.29	3155.73	2320.34	4194.82	4638.38	4612.87	4971.03	4269.61	4443.28	5181	4161.7	4129.23	3679.66	3515.45	4356.16	3002.35	8218.74	3546.68	3336.54	3121.25	3471.39	3942.47	3416.77	3693.53	2921.87		[M+Na]+ 180.062	64	47	10	FALSE	TRUE
612	M203T258	203.052	203.052	203.053	257.863	247.577	260.365	82	82	53330	371984	453955	432608	486108	419353	480109	446212	463150	398091	421904	231885	221781	215923	240769	228981	230663	231382	204720	190629	204325	232218	214511	129653	164837	144232	187660	142711	181699	148530	173743	139050	172324	[36][M]+	[M+K]+ 164.089	35	51	3	FALSE	FALSE
613	M203T174	203.106	203.105	203.107	174.174	172.159	185.698	83	81	6555	9799.8	9094.22	8540.36	9208.8	8252.94	5124.51	12511.3	9846.19	9022.14	6254.66	16970.3	19621.4	15004	15475	21116.1	16589	24260.7	17954.3	21718.8	14331	16788.9	15341	6757.55	11813.9	7231.9	6643.9	7154.05	7162.49	6201.95	9894.66	9035.33	9620.69			42	13	83	TRUE	FALSE
614	M203T39	203.106	203.104	203.108	39.434	28.273	48.358	69	67	3826	4644.66	3272.01	8924.29	1529.9	3673.08	9570.22	2672.14	2443.98	2402.19	5279.41	6966.66	13145.6	8743.51	31480.4	16289.3	22414.7	13463	13904.7	7361	21167.4	26739.6	6458.72	12578.2	14967.1	7797.36	12386	12931.1	16251.5	12557	17151.4	9113.55	10737.4		[M+K]+ 164.145	2	0	0	FALSE	FALSE
615	M203T495	203.15	203.148	203.151	495.334	489.879	504.525	71	71	29468	11730.8	35690.5	11500.4	39769.6	10867.1	42677.8	45818.2	37481.5	12267	39342.9	63545.1	60392.4	66599.2	66388.3	66581.3	80459.4	68084.4	64635.7	66365.2	69546.8	65161.6	77184.4	91601.1	80314.4	86421.5	80671.2	93071	78729.9	93649.8	70917.5	92132.2	66957.7	[37][M]+		116	57	229	FALSE	FALSE
616	M203T533	203.15	203.149	203.15	533.301	509.003	567.591	142	48	5331	3682.43	8013.58	2660.41	7319.9	1376.91	6191.56	10873.5	7990.39	3841.46	8248.35	17365.4	5505.6	7964.15	7828.25	8689.81	13228.8	9726.65	8978.65	7255.33	3978.43	10545.1	8100.01	3540.76	11156.2	9786.85	4414.06	10183.9	32599.5	11227.5	29892.9	16738.9	30320.2			169	47	117	FALSE	TRUE
617	M203T409	203.175	203.17	203.175	409.126	403.767	425.795	96	82	7295	11061.2	14176.8	12213.2	14914.8	12953.6	14245.2	13947.3	13823.3	13558.2	13399.9	14822.4	14567.8	16316.1	15423.8	16063.2	18088.4	19439	15925.9	15078.5	14788.3	15288	17040.5	11254.5	18362.4	12447.4	18095.1	11788.5	17370.2	13013.1	17356.7	11500.7	15505.3	[38][M]+	[M+NH4]+ 185.136	81	53	22	FALSE	FALSE
618	M204T258	204.055	204.055	204.056	257.828	247.43	261.209	81	81	2288	14080.8	19088.5	20466	19903.6	19458.2	17231.4	18743	19930.8	16329.6	16792.2	10619.1	9457.79	9103.43	11441.2	10167.8	11381	10117.7	10875.8	8640.85	10198.9	9893.75	8591.04	6775.51	8336.44	9287.23	8988.51	7176.18	7789.64	7709.8	7781.19	6990.79	7716.75	[36][M+1]+		35	0	0	FALSE	FALSE
619	M204T303	204.055	204.052	204.056	303.448	299.737	308.445	47	47	8031	3097.09	4429.63	4178.88	3781.14	3872.55	734.82	3676.96	3688.86	2502.8	3466.74	7454.65	7652.94	2457.95	8005.85	5235.51	7769.78	7527.78	3484.04	4574.94	2374.97	4892.53	6704.92	6227.06	1340.4	3528.35	6518.36	6585.71	4550.88	6487.34	6184.37	6597.32	6315.38	[35][M+1]+		23	0	0	FALSE	FALSE
620	M204T429	204.086	204.083	204.087	428.86	426.48	433.549	52	52	1737	7200.1	8882.4	6662.34	5676.38	7743.02	9215.31	6302.08	7494.99	7499.83	5234.1	2344.62	2436.15	3085.41	2633.42	1679.02	1604.06	2006.49	1759.78	1522.9	2405.03	2813.86	1459.88	1180.91	1593.65	1669.58	1393.89	2109.66	1709.47	1332.86	749.335	1666.14	1723.81			78	4	11	FALSE	FALSE
621	M204T174	204.109	204.108	204.11	174.05	170.505	177.625	41	41	1367	2859.82	2849.07	2479.19	2772.49	2287.89	1371.79	3511.15	1305.6	2490.03	2906.26	3285.39	1630.92	2264.91	2769.25	3035.81	3835.64	3768.72	2889.93	1304.16	3501.12	2942.99	2965.14	2774.46	2545.87	2004	2374.94	1128.13	2567.38	2423.68	2599.64	2898.55	2651.98			42	0	0	FALSE	FALSE
622	M204T309	204.122	204.121	204.123	309.24	306.235	321.524	79	78	8031	3928.69	1539.95	3923.83	2202.03	3752.27	2125.13	1594.58	2517.42	4093.88	1297.22	4492.97	4782.92	4368.29	4292.33	3513.27	4543.64	4027.5	3582.36	3811.86	3714.37	4328.59	3851.29	3006.66	2501.04	2773.95	1898.66	2987.72	2394.76	2380.19	3199.8	2855.93	2514.76			37	5	16	TRUE	FALSE
623	M204T457	204.133	204.132	204.135	456.957	444.991	463.661	94	78	1620	4146.33	4119.47	9634.44	4209.57	4988.96	3862.49	3791.14	3768.06	10315.7	3799	7254.36	6669.05	3771.24	10401	7490.65	5699.07	4605.18	4336.56	4258.2	4704.84	4574.46	4124.5	11177.6	21500.5	25036.1	22787.3	23773.1	16579.6	11677.9	10512.5	20586.4	18139.2			163	5	8	FALSE	FALSE
624	M204T495	204.153	204.152	204.153	495.377	490.301	505.09	50	50	1894	1230.1	2811.35	626.854	3150.41	938.446	3096.65	2980.7	3676.59	1216.39	3304.37	4765.24	4096.48	3799.5	5157.62	4011.17	4209.09	4229.14	4830.49	4951.17	4430.08	5147.55	5236.48	5210.24	4774.93	5868.37	3747.4	4675.4	4193.57	5761.53	4409.7	4200.63	2623.42	[37][M+1]+		116	0	0	FALSE	FALSE
625	M204T409	204.178	204.176	204.181	409.116	404.932	414.086	71	71	1173	1691.98	2372.58	2005.49	2152.68	1492.9	1572.62	1813.51	1664.72	1395.51	1629.81	2049.26	1754.16	1724.27	2084.84	1349.55	2103.37	1755.19	1922.59	1777.39	1602.24	1479.56	1702.8	1105.31	1803.55	1346.06	1502.6	1500.14	1621.27	1128.64	2015.65	997.56	1465.31	[38][M+1]+		81	0	0	FALSE	FALSE
626	M205T359	204.983	204.976	204.985	358.502	351.612	361.822	52	52	860	189.709	106.175	188.831	261.213	181.986	63.4726	164.512	216.414	263.579	167.089	680.4	560.066	516.928	1182.81	730.542	610.013	886.797	676.62	819.382	528.14	636.862	629.648	355.952	191.354	522.771	260.689	423.66	166.29	339.338	359.479	306.795	166.943			97	0	0	FALSE	FALSE
627	M205T258	205.056	205.053	205.057	257.533	247.114	265.671	47	47	9036	6747.89	7274.53	5146.79	8214.76	6537.94	9979.32	8455.86	8572.62	5469.81	9099.47	6180.66	2362.74	2511.48	1951.54	4159.03	6127.98	2691.18	1895.66	1974.23	1668.45	2476.73	1867.1	1227.11	1953.74	15403.5	23250.5	1410.27	30015.9	13920.7	1434.94	17368.4	22891.6	[36][M+2]+		35	7	95	TRUE	FALSE
628	M205T297	205.067	205.065	205.069	296.512	291.067	302.325	68	68	3346	1879.87	4062.02	2830.13	4682.42	1783.02	1306.71	4707.16	5388.25	4308.82	4486.99	4307.91	3966.27	2515.8	4443.65	4028.75	4977.26	4197.99	4730.4	4227.63	4196.45	4549.03	3464.51	2566.9	4790.39	3923.37	4348.2	3863.92	4782.58	3246.75	3490.67	2535.32	4178.04	[35][M+2]+		23	2	19	FALSE	TRUE
629	M205T312	205.085	205.084	205.089	311.848	306.06	314.531	51	51	1114	4134.6	3195.3	3604.88	2673.89	3307.55	3333.9	3150.52	3054.47	3126.25	2751.97	1689.89	834.21	1757.84	2612.24	2420.24	2065.34	2499.93	1994.47	2331.8	1671.01	882.837	1784	2685.08	1345.68	2349.39	1040.46	1147.46	2912.56	786.752	1210.21	3676.6	1398.28			37	7	95	TRUE	TRUE
630	M205T42_1	205.085	205.083	205.088	42.451	31.669	68.181	48	43	8885	6419.33	8877.17	2814.12	8208.93	5942.36	5897.89	8985.93	5172.46	9298.26	4140.01	19166.4	18851.1	7187.69	16927.2	16490.2	16755.5	16614.3	1447.86	1884.37	17473.8	8324.09	15564.7	70545.1	43400	54388.9	33897.8	51438.6	55558.8	54001.6	44446	53047.5	33434.4		[M+3Na-2H]+ 138.129 [M+H]+ 204.08	7	2	110	TRUE	FALSE
631	M205T198	205.085	205.083	205.096	197.817	184.524	209.016	51	49	3046	2811.38	7264.35	9718.17	4204.82	9098.51	10320.2	1855.77	9836.21	4639.55	7977.09	11055.9	6583.18	9998.07	7029.05	14118.2	12889.4	9037.35	11487.9	6721.33	10940.2	6939.55	13012.4	11885.1	9549.78	2081.65	2878.93	10876.1	3435.96	11353.4	1954.13	7466.58	12214.5		[M+Na]+ 182.097	30	5	95	TRUE	TRUE
632	M205T267	205.096	205.094	205.098	267.327	262.547	281.841	54	53	9350	4566.16	5013.81	2658.51	5906.19	3428.78	5957.43	5011.44	5056.69	4287.96	5272.27	5176.77	4336.81	4432.03	5113.12	5710.92	6830.37	8095.2	6444.1	4581.31	4195.62	5075.26	4522.92	27568.3	32740.9	31606.4	32399.4	28427.2	34359.7	30281.8	34946.9	28964.7	35424.3		[M+H-H20]+ 222.102	48	13	75	TRUE	FALSE
633	M205T153	205.122	205.121	205.122	153.212	149.598	162.529	72	71	44893	200473	190969	185470	153977	177040	179489	165382	200910	215202	183874	50640.8	51821	48624.6	59558.4	61607.7	58731	62388	49634.5	45131.4	43820.3	51080.4	53646.3	173372	299441	185657	310735	173808	349869	191430	372524	195694	340943		[M+H-H20]+ 222.127	65	33	601	TRUE	FALSE
634	M205T42_2	205.122	205.12	205.123	42.2975	30.007	57.93	64	55	7177	3156.12	12008.9	5865.1	10921.1	8351.82	3900.63	12107	4615.94	12002.8	8148.95	30807.1	11467	23384.5	57660.7	60878.7	1685.67	22138	4271.5	18968.2	22678.3	48993.6	8289.66	36119.9	32616.9	40108.1	31992.7	30150.9	34661.1	32088.5	35467.9	38602.3	32179.8			7	13	104	TRUE	TRUE
635	M205T202	205.121	205.12	205.122	202.049	190.874	212.192	52	50	2272	8176.26	10835.6	10716.4	9700.45	9659.42	9870.04	10985.6	8673.8	8558.48	7718.87	6599.78	7599.92	7213.34	8723.38	8762.48	6761.66	8073.76	8371.9	7430.55	7261.84	7290.45	7789.56	6113.19	6573.48	8446.37	6752.74	8631.46	6715.64	8903.65	6772.99	8743.76	5869.39			59	17	601	TRUE	TRUE
636	M205T296	205.118	205.115	205.126	296.461	282.265	311.112	66	61	2763	2402.66	1496.9	2582.04	2176.56	3107.02	2308.41	1815.16	4220.09	1282.16	2020.25	2501.8	2915.17	3045.74	2583.76	3301.84	3168.45	3533.22	1869.23	2048.94	1966.75	2398.58	1892.78	7237.53	7002.26	7483.35	7976.67	8050.15	9651.53	9165.96	9276.29	7610.65	7246.6			23	3	20	TRUE	FALSE
637	M205T173	205.122	205.12	205.122	172.971	168.048	184.885	41	41	9864	13139.9	10044.1	10655.3	10723.1	13390.2	11472.3	11512.8	11817	11022.9	11957.2	9463.25	19139.3	18754.4	17516.5	22548.2	11912	17703.4	17445	16362.7	16843.8	18960.9	13279.8	40855.3	85214.7	22935.7	48969.1	50180.6	46858.4	21568.9	15955.2	21111.7	30952		[M+H-2H2O]+ 240.142	10	19	601	TRUE	TRUE
638	M206T148	206.045	206.044	206.046	148.224	145.778	151.053	82	82	15427	128971	54476	127931	52309.5	118968	55733.2	50170.2	59365.6	124107	51168.9	72154.3	67867.4	60377.6	79483	75876.5	74603.7	91810.2	62243.9	44577.1	48073.6	71359.6	56336.5	57842	87944.8	69730.4	92919.4	66591.6	86810.4	66219.9	95005.2	78115.4	100321	[39][M]+	[M+Na]+ 183.056	24	54	115	TRUE	FALSE
639	M206T234	206.044	206.043	206.045	234.174	221.408	238.462	64	64	12661	7733.78	7434.56	6649.45	7214.68	6508.97	7381.05	6941.82	8150.26	7047.96	7833.34	11815	9925.22	8473.3	13466.4	13564.4	13322.5	15102.7	11796.2	10748.9	10692.8	11675.6	9885.3	452.949	781.977	505.351	616.076	311.988	658.563	352.232	1036.23	364.529	911.144			62	50	109	FALSE	FALSE
640	M206T352	206.044	206.043	206.045	352.274	347.863	356.177	42	42	1642	173.707	113.742	182.46	294.643	346.53	130.63	130.194	117.252	231.056	109.67	1442.85	1374.73	1658.09	1518.02	1265.43	1456.34	1310.32	1188.74	1278.69	1470.18	1533.52	1467.66	88.1079	111.951	124.052	114.249	79.8677	122.093	157.299	146.763	87.2539	102.344			147	13	11	FALSE	FALSE
641	M206T247	206.07	206.069	206.073	247.3	241.378	261.978	79	71	3759	7270.86	6008.94	5219.92	5579.41	5675.93	5161.16	6223.96	6793.8	6300.57	6706.4	5807.44	5000.65	3186.89	10809.6	11885	9652.29	9004.38	8039.07	6676.72	5554.89	5607.7	4841.13	6388.13	5323.38	7397.87	5133.48	6070.29	3726.41	5181.84	4490.19	5976.62	1863.77			15	10	69	TRUE	TRUE
642	M206T324	206.08	206.077	206.082	324.159	322.439	327.7	58	58	1122	1261.91	676.059	1088.47	1143.09	1564.05	1390.6	1424.13	1173.58	1194.51	1676.69	1520.94	1254.08	733.457	959.517	1083.5	870.737	1019.09	1039.23	652.085	898.782	1237.39	1487.05	598.934	578.339	666.211	771.752	617.474	728.367	1108.05	737.596	735.126	436.431			45	7	25	FALSE	TRUE
643	M206T210	206.081	206.071	206.082	210.201	200.924	216.017	50	50	4833	8000.22	17173.7	13312.3	21244.6	12713.4	16358.2	11650.8	23278	16738.9	21119.2	1255.91	2111.49	1017.16	994.292	1168.6	1731.36	632.94	1249	1527.37	678.13	1424.36	1211.46	1157.92	1012.97	1028.37	902.25	1345.74	986.356	1407.52	1227.89	984.007	1240.72			56	4	71	TRUE	TRUE
644	M206T385	206.102	206.097	206.102	385.433	374.743	390.264	80	79	2346	3836.21	5544.11	3851.25	6892.06	5324.46	5419.77	6938.67	6505.49	3702.53	5029.47	6902.04	6570.77	6829.01	9190.79	6741.42	7271.56	7060.2	6692.57	6576.97	6386.76	6514.47	6435.14	5905.04	7312.74	5697.75	7070.96	5236.14	7055.7	5715.61	6964.53	5337.21	6911.15	[40][M]+		165	26	31	FALSE	FALSE
645	M206T154	206.125	206.116	206.126	154.031	149.143	172.328	51	49	4449	21146.9	18924.1	19565	15461.9	20599.9	19696.6	18092.8	18761.7	19798.8	17551.4	5612.95	6914.85	5749.52	11000.3	7752.76	9544.69	8631.5	7540.87	8849.18	7284.65	8835.47	9844.11	20913.6	32812.3	23846.7	32493.8	20679.6	38982.1	22502.7	41536.9	23752.6	30123.9		[M+CH3CN+Na]+ 142.105 [M+CH3CN+H]+ 164.087 [M+H-H20]+ 223.131	65	0	0	FALSE	FALSE
646	M206T177	206.153	206.15	206.156	177.444	164.81	179.565	48	42	2192	1849.2	3010.06	2166.18	2934.31	1896.37	3378.44	2994.11	1759.72	2084.67	2796.63	2631.96	3590.52	2660.88	1536.1	2206.67	2009.69	2368.92	3557.31	2407.27	1214.4	2677.93	2720.34	852.479	646.47	688.988	887.763	787.656	1358.72	1269.62	638.512	683.964	527.318		[M+H-2H2O]+ 241.168	42	0	0	FALSE	FALSE
647	M207T346	206.945	206.943	206.947	345.614	342.808	355.772	44	44	414	926.744	1431.41	1386.97	1650.87	1453.09	954.673	1198.2	1050.09	1143.44	1051.05	788.516	1061.47	1119.61	1066.09	1324.44	1238.79	1091.07	1652.88	968.639	1228.55	1255.3	674.45	277.735	524.989	335.703	388.841	598.4	371.482	483.606	430.158	436.216	202.094		[M+3Na-2H]+ 139.989	54	0	0	FALSE	FALSE
648	M207T375	207.013	207.011	207.016	375.079	369.254	391.614	68	61	15493	475.077	399.55	333.355	406.36	487.213	346.432	310.285	373.329	539.29	433.768	12587.3	11597.2	9897.35	9264.61	9700.8	12189.6	13570.4	12214.9	10470.5	11003.9	13239.2	12750	3809.95	1542.68	2836.12	1764.22	3638.62	1456.7	4287.03	1486.17	4193.19	1576.95		[M+K]+ 168.052	34	14	16	TRUE	FALSE
649	M207T258	207.052	207.051	207.052	257.95	248.312	261.865	82	82	33089	52503.2	47278.3	63985.8	49990.3	49460.4	50330.4	51995.4	45140.4	52657.2	47853.5	91280.3	86615.8	83055.8	65966.6	67043.1	77361.4	56194.3	73381.6	119114	98634.8	98357.9	91769.5	48525.9	50197.4	58497.8	63849.5	61002.3	60204.9	51233.4	48508.4	44518.6	47620.1	[41][M]+		35	1	24	TRUE	TRUE
650	M207T149	207.048	207.045	207.05	148.517	144.279	154.883	56	56	162085	5576.86	2590.72	5201.96	1992.5	7030.64	1175.93	3157.92	2661.11	7516.91	3115.09	4498.18	3599.26	2777.23	5141.65	4786.32	3990.66	6789.38	4623.27	320993	5069.43	2612.3	4098.92	3466.05	5152.09	4428.33	4218.98	36616.8	5788.83	35862.7	4867.51	4325.35	2552.4	[39][M+1]+		24	10	284	TRUE	TRUE
651	M207T180	207.064	207.063	207.067	180.042	172.808	182.564	58	58	7508	23419.9	25907.4	18892.1	28543	19528.2	24897.8	25737.6	24696.8	23653.1	27235.8	6871	6592.82	4598.53	8290.21	6125.68	7855.8	7205.82	8561.92	7229.17	6616.5	9890.3	8970.13	1537.07	1068.66	53393.4	49717.8	53002.9	53625.8	53285.3	1657.6	50242.5	52696.3		[M+CH3COO+2H]+ 146.036	14	13	259	TRUE	FALSE
652	M207T31	207.064	207.062	207.067	30.867	27.003	51.208	65	61	17757	8066.42	11997.6	8464	10583.4	6765.02	9935.43	11487.1	12333.3	7688.36	11595.5	7414.91	7201.27	14790.7	6564.61	7384.47	8108.43	8034.85	7108.97	8519.67	8611.07	7912.32	7311.32	8397.65	4909.47	3751.57	6763.67	65742	2815.18	8571.66	4134.95	6761.09	3073.33		[M+CH3COO+2H]+ 146.036	3	3	80	TRUE	TRUE
653	M207T183	207.101	207.1	207.106	182.742	166.385	212.445	94	82	8873	22478.1	26042.3	43851.7	40891	20126.8	43121	26079.3	23075.8	27437.8	27224.6	45471	31237.7	33248.9	34753.4	37470.3	52324.4	39629.5	35381	36153.4	35386.4	55329.4	34630.6	51135.5	41322.7	46466.3	39210.3	51706.6	57551.9	49833.2	44437.9	48136.1	46789.8		[M+H]+ 206.096	29	27	259	TRUE	FALSE
654	M207T313	207.101	207.099	207.103	312.943	309.8	332.988	71	68	2402	3287.97	2132.15	2362.52	2710.82	3048.01	2156.46	5322.48	1319.96	4833.42	2459.91	2370.68	1753.22	2342.25	2351.62	2634.33	4208.84	2353.39	3169.42	1862.07	1826.09	1803.79	1396.78	1392	1603.17	1232.05	1738.82	1512.87	2204.51	1594.29	1749.93	1914.93	1654.01		[M+H]+ 206.096	66	1	49	TRUE	FALSE
655	M207T386	207.104	207.1	207.107	386.127	376.041	391.324	52	52	889	1005.17	1185.13	1158.27	1452.1	1177.54	1258.1	1345.84	1064.17	1288.56	1103.53	807.986	231.902	1204.79	680.906	1029.07	1698.39	813.29	1162.53	616.28	705.953	723.855	998.703	1000.54	961.501	636.692	981.703	940.909	1074.26	715.741	1068.44	1108.95	928.073	[40][M+1]+		165	1	46	FALSE	TRUE
656	M207T33	207.116	207.115	207.119	33.228	28.815	54.482	50	47	59153	21633.1	23358.5	20164.9	20495.6	18304.8	20974.4	23279.9	25499.6	17952.8	23412.9	23522.8	21558	20101.4	23339.7	20120.8	22798.9	12947.7	20144.2	12756.4	21462.5	13377.5	9900.75	164878	4341.77	167400	160869	160522	2849.21	745.518	194808	136943	6693.86			3	3	206	TRUE	TRUE
657	M207T134	207.137	207.137	207.138	134.196	127.579	140.418	84	82	204967	368332	312456	372203	276103	343239	325904	300043	301785	386474	314366	1.65848e+06	741014	1.23799e+06	1.65026e+06	1.45221e+06	1.81723e+06	1.75651e+06	1.86233e+06	1.319e+06	1.56683e+06	1.62901e+06	1.55837e+06	100226	163054	105352	172404	111482	173231	113263	235198	108609	173498	[42][M]+	[M+H]+ 206.136	13	78	2251	TRUE	FALSE
658	M207T170	207.137	207.136	207.138	170.056	156.941	193.774	66	56	37870	227499	154818	169685	144458	168043	108020	157153	159257	176592	156111	70291.8	169654	331236	64983.9	144547	68009.6	76353.7	65413.3	70276.9	74311.2	69817.3	72285.3	61438.2	72103.3	49000.9	68262.5	60707.1	71544.6	61536.3	67358.9	58952.4	66131.3			10	46	897	TRUE	TRUE
659	M207T190	207.185	207.184	207.186	189.533	181.015	192.683	41	41	3375	23792.4	16112.7	30806.6	14431.5	32263.7	17228.9	13243.1	17504.7	23617.3	13247.6	6073.31	5690.94	4379.44	7643.23	7113.23	6369.42	4893.42	5380.42	3932.5	4939.43	5093.47	6055.99	3386.62	3290.31	3432.45	3588.83	3263.12	683.206	1441.56	1141.55	2834.38	4444.09		[M+H]+ 206.179	40	5	70	TRUE	FALSE
660	M208T258_1	207.553	207.552	207.554	257.805	249.077	261.865	82	82	5234	7912.05	7820.42	9569.06	7403.37	7491.79	6178.87	8514.09	5865.77	6619.77	5720.33	11792.2	11487.8	11463.8	9809.24	9575.75	10258.1	7341.5	9166.67	17161.7	13657.4	12436.3	12607.4	6579.21	6567.07	9092.17	8580.42	7469.13	8660.7	6101.96	6078.19	7010	5857.77			35	0	0	FALSE	FALSE
661	M208T258_2	208.054	208.052	208.06	257.566	246.797	262.325	67	67	6841	41424.5	62577.4	67320.5	62693.8	56114.7	58284.2	64805.1	46341.8	48574.5	42928.3	5139.75	2793.44	5133.6	3702.63	4380.67	3620.21	2877.22	2629.38	8003.38	5276.87	5320.42	5799.96	1609.03	1473.73	2251.08	2534.46	2969.1	2637.03	1970.89	2087.43	2017.63	2069.75	[41][M+1]+		35	0	0	FALSE	FALSE
662	M208T323	208.081	208.079	208.082	323.32	321.969	326.74	66	66	37889	328997	194810	242394	209844	279076	307835	253487	249504	266514	331355	966.336	1755.55	1556.96	1709.07	1086.12	1876.64	2369.21	1532.89	1063.74	2050.44	25331.2	1652.8	3109.64	756.09	1831.7	1113.88	1718.43	1145.29	2363.52	1055.43	2484.99	793.291			45	1	10	FALSE	FALSE
663	M208T216	208.096	208.095	208.097	215.984	201.607	221.947	79	78	8313	19617.9	11165.8	9941.58	10820.2	10938.9	11457.1	10815.3	14393.4	18372.9	15072.9	8744.67	9876.29	8969.28	8733.69	10194.2	7770.82	12433.5	9207.4	4785.27	6856.31	8897.77	8071.01	1511.88	781.974	967.33	2421.33	1481.51	1026.84	1546.4	995.328	1903.21	964.959		[M+H]+ 207.089	83	9	13	FALSE	FALSE
664	M208T33	208.096	208.094	208.103	32.799	29.245	55.706	73	57	6835	3203.82	3543.56	1986.4	2985.66	1431.39	2731.97	3616.61	3189.97	3218.81	3088.87	19166.8	19222.1	11514.4	14707.5	20879	14254.3	12935.2	16364.8	12604.6	16878.2	15656.1	12214.2	12041.2	13699.4	12818.4	13172.4	13337	14278.1	13860.4	16429.3	11736.4	14298.3			3	1	29	TRUE	FALSE
665	M208T183	208.104	208.096	208.107	182.538	180.699	192.001	76	75	2050	3978.38	4812.11	4172.47	4094.85	3241.55	7915.56	3965.94	4534.15	5420.25	5201.46	7162.6	5933.56	5316.08	4206.58	6748.55	6370.25	5345.61	6377.87	7459.65	6942.03	6134.99	5751.73	8854.84	9243.48	9032.69	6135.15	7745.84	6434.47	8911.33	7098.24	7084.46	5122.08		[M+NH4]+ 190.066	29	9	13	FALSE	TRUE
666	M208T300	208.117	208.114	208.119	299.815	295.759	310.28	48	47	278631	2.10283e+06	1.63201e+06	1.64907e+06	2.28809e+06	1.76676e+06	1.98932e+06	2.49337e+06	2.00447e+06	2.07054e+06	2.00353e+06	406128	383498	372719	450939	429683	427425	418859	377885	283601	353246	385002	379376	1590.69	2472.43	2064.13	1785.97	1971.18	2231.81	1961.64	826.594	1668.09	2318.17		[M+H]+ 207.107	23	29	661	TRUE	FALSE
667	M208T411	208.117	208.115	208.119	411.216	398.165	419.87	76	71	6458	88464.6	44607.6	70254.5	46455.9	39703.9	96814.7	106045	61618.7	83528.9	61368.9	17842.9	24401	12506	12106.6	12738.5	14093.4	18488.6	10003.2	4068.59	8914.6	10247.9	9503.18	1191.96	983.747	1037.24	1046.22	1306.82	1241.46	922.001	794.093	1161.52	711.751		[M+Na]+ 185.136	81	16	46	TRUE	TRUE
668	M208T134	208.141	208.14	208.141	134.154	126.029	143.718	81	78	22281	35753.8	30033.9	34077.8	32710	29465.9	28944.1	27209.4	30071.7	32899.4	30366.4	140074	132421	117104	173825	176066	174679	170942	167928	167966	136710	139449	142724	10671.5	24377.5	9872.62	17198.4	11711.6	16998.8	11934.4	17001.4	11927.1	13839.4	[42][M+1]+		13	0	0	FALSE	FALSE
669	M209T327	208.96	208.959	208.973	326.68	324.57	346.975	77	70	609	2397.45	2523.91	1790.2	2143.56	1589.76	1918.15	426.565	2203.05	1768.77	1967.68	914.588	923.046	874.314	811.103	1138.35	1277.32	1587.71	1082.21	1041.82	823.597	928.243	829.776	782.575	1072.37	1073.93	746.172	943.323	933.045	996.649	657.842	961.316	875.148		[M+H-2H2O]+ 243.976	96	0	0	FALSE	FALSE
670	M209T258	209.048	209.047	209.049	258.306	253.7	262.325	45	45	5614	6964.37	3986.94	3825.23	3583.92	4173.12	12948	5473.16	8716.51	7580.14	14588.1	1870.8	1888.69	2038.3	1259.96	517.366	2250.62	2426.73	1508.81	2252.16	2388.07	2827.68	1424.99	1505.29	1748.21	2290.76	1510.42	1818.79	1077.39	1699.15	1265.12	1321.08	1231.45	[41][M+2]+		35	0	0	FALSE	FALSE
671	M209T35	209.096	209.093	209.098	35.253	28.273	52.671	64	57	6151	8305.51	10590.8	7513.52	9644.98	590.537	11072.8	9860.62	9623.24	7803.86	9283.54	4118.79	17319.5	27158.7	13656.9	13330.3	6029.28	14450.1	46806.9	15207.5	19653	17258.9	8143.67	14138.7	3400.18	13126	5764.41	12058.6	4277.46	14032.5	4792.25	13437.5	18436.1		[M+Na]+ 186.107	1	0	0	FALSE	FALSE
672	M209T37	209.132	209.127	209.133	37.096	28.971	69.072	96	79	13328	6211.85	10572.5	8144.12	8473.98	2765.67	11642.6	8077.45	5689.13	3685.98	5643.63	53180.8	56590.7	61501.7	54597.9	56530.6	55527.6	62741.4	44536.2	58341.8	62992.1	34655.5	66410.6	2713.46	13495	13642.4	12321.3	12446.8	12093.6	3266.68	11664	5262.89	12493		[M+Na]+ 186.135	1	0	0	FALSE	FALSE
673	M209T165	209.153	209.152	209.153	164.631	157.388	194.813	72	67	26346	88164.8	119177	96801.4	70943.5	106333	93800.6	96546.3	93401.7	88025.2	98275.1	98828.6	74340.3	101542	120975	125294	130932	129325	109567	117935	114189	111249	114792	15368.1	36810	24269.3	41427.1	26171.8	64018.9	33631	62952.6	23669.1	29157.4	[43][M]+	[M+Na]+ 186.168 [M+H-H20]+ 226.159	9	46	171	TRUE	TRUE
674	M209T145	209.153	209.152	209.154	144.572	142.176	146.633	52	52	33143	36423.4	41293.9	39200.3	41575.7	37841.8	42265.8	31350.6	42089.4	36417.1	39144.6	122893	131543	130042	161360	160855	139253	158920	129712	118691	111671	143571	115538	18545.6	33249.5	21389.2	33373.4	21618.8	33150.7	20552	32520.4	20601.7	29874.6	[44][M]+		111	35	149	TRUE	FALSE
675	M209T118	209.153	209.147	209.154	118.326	110.007	131.185	55	52	7802	94605.5	102362	137568	146260	79334.6	140263	80355.9	137974	98710	137269	64565.3	55382.9	50638.2	76426.4	51925.1	73148	70444.9	38256.5	57294	61688.5	58467.8	39491	23927.4	101255	34390.1	111834	51449	102079	64614	50831.4	47253.3	41835.7			47	39	133	TRUE	TRUE
676	M209T36	209.453	209.448	209.459	36.194	29.412	57.607	57	54	4101	375.133	141.558	286.322	73.5532	290.162	52.6158	368.026	340.545	0	267.293	12150.1	9660.07	11989.8	7345.23	9237.1	17881.3	17321.6	16791.6	9713.83	10202.1	7659.56	8800.89	820.998	1330.55	733.053	2854.75	1283.86	2157.05	1660.97	2564.55	888.125	2827.7			1	0	0	FALSE	FALSE
677	M210T393	210.037	210.035	210.039	393.474	381.907	398.324	42	42	746	784.2	611.927	634.641	324.503	1027.06	519.369	387.84	652.277	594.031	614.699	863.709	706.54	904.992	877.928	861.901	648.546	1147.63	776.495	740.774	643.475	719.139	1128.22	699.509	775.064	438.073	865.502	620.407	848.659	434.476	673.1	475.695	1308.7			151	0	0	FALSE	FALSE
678	M210T680	210.087	210.086	210.088	679.746	669.102	687.353	64	56	1086	4864.84	5333.3	5083.67	3701.08	5207.79	3052.17	5175.46	2556.89	5528.88	4643.73	3898.1	6432.69	5192.89	6502.1	6956.89	6406.6	6125.32	4497.37	6165.72	8431.55	6963.39	4358.14	4238.68	8100.34	7970.9	5111.31	3831.91	7685.82	5693.58	3895.75	4726.12	4660.18			199	0	0	FALSE	FALSE
679	M210T651	210.087	210.086	210.088	650.637	618.559	667.745	125	57	1280	12520.7	3861.53	5785.9	3121.76	2605.67	5640.23	22953.3	8292.3	663.18	471.6	3875.84	4980.94	4436.48	5421.43	6349.79	6399.34	5777.44	8858.05	5684.09	9507.53	5443.93	7441.69	4145.99	4077.54	11860.8	23032.3	5277.1	6353.41	5098.11	10112.4	2478.25	4595.33			143	0	0	FALSE	FALSE
680	M210T701	210.087	210.086	210.087	701.107	689.373	719.292	100	63	1356	5531.09	5919.19	4125.95	3759.03	6672.58	11430.4	422.389	6696.06	5938.17	8722.37	8898.23	5847.09	5508.2	7764.38	9137.61	6570.96	8709.02	7048.36	8759.18	7787.92	6362.14	10857.3	5672.46	4088.67	8085.72	6699.97	3891.8	4193.21	6650.18	584.416	5884.96	4943.09			195	0	0	FALSE	FALSE
681	M210T38	210.112	210.111	210.113	37.5655	29.535	53.648	90	82	1544628	64774.7	34363.3	59785.5	35988.6	63387.1	34194.3	33288.6	40062.3	66269.3	36828.5	8.32026e+06	8.08811e+06	4.98249e+06	7.40405e+06	8.72512e+06	8.22962e+06	9.62729e+06	7.21883e+06	1.05196e+07	1.08587e+07	9.67002e+06	1.09778e+07	92534.5	394403	83543.3	487344	89948.2	530470	103251	509696	87861.2	466209	[45][M]+	[M+CH3CN+Na]+ 146.103 [M+CH3CN+H]+ 168.085	1	75	1222	TRUE	FALSE
682	M210T242	210.112	210.111	210.113	242.315	234.129	267.831	116	77	203906	10602.9	4646.41	2346.21	4975.13	6544.5	5328.41	6043.1	7273.29	5127.83	5579.68	423198	389943	350238	359017	421065	406408	499863	392625	218941	267429	351288	342496	6015.03	13814.9	5018.96	7518.9	3889.23	4515.27	8863.86	11406.1	4057.84	4271.05	[46][M]+	[M+H-H20]+ 227.114	31	51	331	FALSE	FALSE
683	M210T172	210.112	210.104	210.112	171.952	161.957	189.242	60	46	27536	2793.1	7118.31	5115.94	7360.5	2016.04	6863.43	5990.98	7896.72	6919.32	7815.84	56044.3	95377	70872.8	53969.9	63727.3	66832.2	69486.4	65791.3	40554.5	40343.3	74834.9	64955.5	9175.1	11228.6	14669.5	10972.6	15552.4	3620.17	9296.62	9878.36	7296.61	7053.36		[M+H-2H2O]+ 245.12	10	24	692	TRUE	TRUE
684	M210T145	210.156	210.149	210.157	144.621	139.81	153.813	47	46	4947	5147.98	6036.2	6218.2	6378.41	6103.53	5588.42	5843.25	6046.43	5935.58	5877.54	15567.7	13166.4	12647.7	21343.9	17598.7	15436.6	18223.6	17241.2	13556.4	13832.6	15956.1	12328.9	2298.13	4357.62	2848.35	4606.9	2901.01	4246.49	3158.95	4441.19	3218.15	3507.88	[44][M+1]+		111	0	0	FALSE	FALSE
685	M210T164	210.156	210.154	210.157	164.168	158.262	170.074	63	63	5295	14217.3	13689.5	12919.1	13889.5	8626.46	15720.9	16465.3	14238.3	10322.2	7181.69	12043	6940.53	18019.9	18102.6	19519.4	21136	43280.6	16649	44951.2	13055.6	16689.8	34040.7	3079.95	9029.07	3146.12	7524.01	4719.8	9002.4	3571.85	5722.9	5129.62	5234.14	[43][M+1]+		9	0	0	FALSE	FALSE
686	M211T359	211.018	211.015	211.019	358.615	352.822	379.112	84	82	2388	1770.55	1816.75	2541.79	3089.49	2842.41	2440.47	2979.41	2124.05	2104.91	3125.62	9253.21	8229.98	7674.78	8090.14	8944.58	12312.3	11251.7	8698.33	8912.44	11091.5	8280.26	8822.06	12308.6	8663.61	13846.6	7969.87	12459.4	8569.11	12337.1	8112.61	12204.7	7701.99			144	9	10	FALSE	FALSE
687	M211T399	211.056	211.054	211.058	399.194	388.56	406.482	61	61	861	2029.55	3578.26	3037.6	2934.94	2687.47	2735.34	2326.36	2412.64	2004.41	2497.04	955.762	964.205	950.865	2749.84	2979.83	2165.12	2038.18	1526.15	1869.38	1368.68	609.987	1215.31	1315.43	1992.37	2018.81	1880.26	1655.6	1552.47	1573	1588.64	1441.94	1479.59		[M+Na]+ 188.068	67	2	13	TRUE	FALSE
688	M211T269	211.075	211.073	211.076	268.851	265.127	286.908	53	41	3039	2925.07	2351.38	3813.18	3996.88	2548.46	2778.93	5791.46	2771.55	3551.1	2637.56	2528.5	2414.42	2963.29	1464	1950.69	8863.3	12343.6	2370.04	3897.86	3336.82	2446.13	2626.82	10230.3	8138.8	11301.4	9370.22	31908.2	10034.5	10830.7	21288.6	8925.37	22335.5			76	2	22	TRUE	TRUE
689	M211T668	211.097	211.096	211.098	668.154	665.176	673.167	51	51	3244	13587	39063.8	45467.2	18261.6	5517.14	13574.4	32633.8	15465.9	13018.1	6356.55	29581	11085.8	20958.4	36592	16542.8	30991.6	27943.8	23640	40541.6	17314.9	17242.5	13950.7	12735.1	14823.4	38119.3	10474.1	17145.9	13419.3	11063.8	8808.79	14894.7	11926.6			172	15	10	FALSE	TRUE
690	M211T38	211.115	211.112	211.116	37.51	29.412	54.231	90	80	179201	39203.1	5202.68	7727.65	3966.11	36809.8	4814.58	3058.15	3973.14	9871.98	3978.42	761692	759550	752273	700548	723377	742813	892220	684249	431001	947999	806513	489722	15205.1	48036.6	17009.9	58286.1	15151.6	57949.9	16931.5	56231.1	15975	49694	[45][M+1]+		1	1	112	TRUE	FALSE
691	M211T241	211.115	211.114	211.116	241.393	234.661	265.999	91	62	22077	4675.28	4430.73	3653.31	3749.74	3315.47	3748.81	3993.79	3569.08	4624.61	3686.16	36589.4	29357.7	54139.4	29416.8	34912.5	31524.3	40163.8	34277.3	13836.4	22848.9	31203.8	28935.4	2843.75	2681.26	2502.53	2711.89	2171.79	2910.36	2470.26	3442.67	2906.78	2668.03	[46][M+1]+		31	0	0	FALSE	FALSE
692	M211T318	211.115	211.114	211.124	318.016	294.456	321.809	51	49	3962	4797.14	4883.32	4941.03	4777.05	5030	5558.6	4032.82	4383.61	4222.47	1141.99	12985.9	11185.4	22020.1	10640.1	13630.2	10988.8	11665.9	10705.8	9845.45	11673.2	12743.1	11340.9	2189.88	3135.47	2992.31	2889.37	2592.13	3489.43	2547.88	3110.45	2981.19	3288.26			84	1	22	TRUE	TRUE
693	M211T149	211.147	211.146	211.148	148.749	117.467	163.782	70	43	3636	7220.19	9410.13	8861.5	10718.3	7662.27	7677.95	7460.67	7806.46	7412.68	7631.03	12701.4	18866.9	7103.38	25343.4	18073.7	10640.8	19775.1	26945.7	9142.14	16807.4	17873.5	12666	14080.8	13276	15511.3	12299.4	17181.7	10998.7	14201.3	11036.7	15302.4	10456			24	4	111	TRUE	FALSE
694	M211T36	211.147	211.144	211.149	35.5885	28.192	44.984	68	66	179201	39386.3	55501.8	43321.1	52479.8	37414.9	49978.1	52552.3	54758.1	41233	56338.6	813494	13487.4	27555.9	40440.3	22390.2	14706.4	19543.8	22400.5	11647.5	25754.1	28188.1	15184.7	4699.77	5915.6	3432.2	9651.51	2636	8231.5	6247.46	6618.89	5495.44	6564.56			1	4	100	TRUE	FALSE
695	M211T193	211.168	211.165	211.17	192.947	171.094	200.016	84	72	4440	5528.21	7068.61	9008.27	6436.91	5743.69	7959.14	3611.46	6928.92	6097.14	6760.1	15845.7	16037.7	7572.62	30528.9	17494	19644.7	13052.7	16375.6	15650.3	14956	28449.5	14720.9	5929.13	14732.6	5207.94	10034.3	5661.23	11292.9	5537.46	15585.3	8086.13	14917.1		[M+H]+ 210.164	39	10	144	TRUE	TRUE
696	M211T94	211.168	211.168	211.169	93.638	73.839	112.157	72	62	12157	4105.04	3791.96	3712.76	3766.34	4069.58	7067.35	7090.3	7423.57	2964.06	7524.71	63334.1	30529.6	38022.7	67340	67152	73796.4	66042.6	64039.5	55593.2	49880.4	51633.6	52591.1	2697.87	3701.49	3031.51	3755.46	3304	3580.51	3181.08	3903.78	2894.02	3676.2		[M+H]+ 210.163	102	37	125	TRUE	FALSE
697	M212T220	212.091	212.088	212.095	220.111	213.47	239.9	53	52	15215	89051.8	116450	99847.8	108997	102172	94326.8	104066	124126	90844.2	95011.8	3223.28	3357.2	2422.53	48794.2	54024	53257	3430.7	2834.17	40337.3	43359.9	41924	1992.79	1811.42	2005.51	1463.71	1704.66	1169.95	1801.22	2095.99	2763.93	2228.43	2052.48			20	0	0	FALSE	FALSE
698	M212T247	212.112	212.111	212.113	247.207	239.368	263.139	97	81	29401	16770.3	12135.4	11121.2	13246.3	13996.3	12458.9	14900.7	24416.9	26749.8	13543	103039	89902.1	93135.5	119345	126895	119944	135584	151984	101935	105092	112414	95422.8	108180	95714.9	128519	96627	106290	66265	110921	91945.5	102663	92113	[47][M]+	[M+NH4]+ 194.08	15	32	134	FALSE	FALSE
699	M212T39	212.117	212.116	212.129	39.251	29.143	73.779	83	69	13328	1229.77	10860.4	9954.48	10500	9370.1	11005.5	9984.06	2509.83	7808.7	2431.13	74885.1	38840.4	66455.4	68818.5	67758.9	44722.8	74076.6	77701.7	80855.5	81546.8	38378.6	91790.6	4268.51	12276.3	9255.12	5566.1	10250	6378.78	11009.3	2169.61	3645.62	12291.7		[M+H]+ 211.117	2	6	57	TRUE	FALSE
700	M212T36	212.15	212.14	212.153	35.949	30.305	54.388	61	55	13670	19444.4	13671.6	26609.8	15769.9	21783	15221.6	12434.9	11920.4	22726.3	10680	5551.06	5557.79	67711.7	5947.1	1861.34	4746.3	69775.8	5553.99	5728.74	3620.87	3520.66	7402.06	11448.6	13651.3	10387.1	1006.26	10995	1960	11978.8	1533	10574.5	979.282			1	2	57	TRUE	FALSE
701	M213T336	212.955	212.954	212.957	335.724	324.501	341.558	84	82	2172	4083.84	4658.99	4202.91	4653.65	4161.78	4572.66	4229.72	5019.65	3631.09	4841.64	7093.09	6176.18	6643.32	5657.17	7822.5	8397.73	8958.43	7236.63	6425.58	6695.42	7268.18	6701.84	7425.13	8367.82	8776.46	7783.87	7901.79	8269.31	7140.62	8624.4	7688.7	7381.31			139	2	2	FALSE	FALSE
702	M213T178	213.075	213.072	213.077	177.927	175.744	180.352	54	54	2482	3649.17	4175.42	3446.56	4057	3582.88	4145.62	4041.43	4630.91	3132.81	3928.82	2997.09	9577.04	3706.8	2599.31	4022.3	3373.77	5371.67	3333.17	3585.19	2937.2	10637.7	3298.3	8082.94	13496.6	8584.82	13783	9103.3	12841.9	10258.5	13031.4	9763.5	11416.4		[M+Na]+ 190.084 [M+H-2H2O]+ 248.09	42	0	0	FALSE	FALSE
703	M213T37_1	213.09	213.085	213.094	37.484	28.881	58.713	64	61	5126	11198.6	11032.7	11919.7	10623.1	1502.94	11024.2	11045.5	10311.7	10906.8	1115.99	8680.06	6068.16	5675.31	4781.94	38513.8	7290.16	8062	33232.2	6908.87	43111.8	14131.1	5535.16	26201.3	5113.75	4696.79	29724.9	10265.8	8334.98	13304.4	7246.14	9917.51	9816		[M+Na]+ 190.104	1	0	0	FALSE	FALSE
704	M213T175	213.112	213.108	213.113	174.908	152.301	184.081	60	56	2978	15703.3	13967.9	18578.9	13047.9	19106.4	12336.9	8989.45	12754.5	10401.7	12609.2	4532.42	12322.1	6143.64	10681.3	6567.56	20707.6	5099.82	14708.6	5769.38	15062.7	14747.7	5005.63	3614.1	33231.6	13553	28864.4	7121.52	25568.7	12993	24065	7982.74	12917.3			42	1	39	TRUE	FALSE
705	M213T247	213.115	213.11	213.119	246.849	239.918	251.721	71	71	4202	2250.85	2463.42	2190.24	2646.79	2523.78	2086.3	2091.96	2875.55	2391.45	2256.66	8352.5	7686.99	9508.02	12253.1	12401.5	11894.5	10573.7	12268.5	10470	9516.51	10657.8	10599.1	9204.26	7605.62	9614.69	7614.81	10348.4	6097.37	9258.33	8450.34	7976.34	8044.61	[47][M+1]+		15	5	9	FALSE	TRUE
706	M213T38	213.127	213.125	213.128	37.687	30.435	54.86	67	64	7177	14289.5	15758.2	15511.4	15046.8	13984.6	15794.6	16327.8	16073.6	14259.3	15956.7	24223.2	26469	24477.6	20895.6	66755.6	24898.8	37516.8	32556.7	36873.8	61208.9	99910.9	44020.7	22784.4	32598.8	34855.9	34336.8	27043.3	27714.2	22330.7	29684.4	20918.6	23308.3	[45][M+2]+		1	0	0	FALSE	FALSE
707	M213T37_2	213.162	213.153	213.164	36.923	27.423	45.152	45	45	2392	5341.65	3224.69	5501.42	2934.02	2264.56	3276.32	1686.12	2929.37	1650.62	3208.58	5247.87	12307.6	7525.04	8460.26	11652.4	7182.12	6996.83	3420.24	4443.24	12320.1	7717.27	13938.2	7384.1	9518.66	3857.11	10262.2	3786.62	11053.2	2961.62	9537.72	8122.73	4219.05		[M+NH4]+ 195.121	1	0	0	FALSE	FALSE
708	M214T414	214.001	214	214.002	414.463	406.772	428.189	91	82	2094	8633.18	12898.9	10347.2	13917.2	10355.3	13258.3	14783.3	14258.7	8277.31	6987.15	18160.7	10866.5	9313.24	15037.9	16910.1	14024.3	9315.98	7685.29	29556	20238.8	12856.6	10236.1	10683.5	17028.5	13854.2	13692.5	8040.03	19777.6	12300	6894.22	13642.2	15638.1		[M+K]+ 175.036	41	14	14	FALSE	FALSE
709	M214T313	214.038	214.036	214.04	312.715	310.456	322.984	73	73	3416	3750.91	2959.23	1746.79	3340.45	2627.32	962.596	3081.75	2721.82	2408.77	2282.07	5758.24	5249.06	5031.3	4122.2	5463.48	4577.68	4235.04	4938.06	5345.77	5883.76	5699.19	5342.11	15176.4	17392.4	16027.1	18064.5	15594.4	16488.1	15389	16928.2	14526.4	15909.7			66	4	16	FALSE	FALSE
710	M214T247	214.059	214.059	214.06	246.697	239.918	254.868	75	73	23922	6420.59	3620.97	5615.21	4176.75	3981.36	4546.32	3547.38	4796.91	6053.29	5186.36	72156	65692.6	51385.7	49503.4	54129.4	55001.4	44809.1	59624.9	80839	75770.3	81372	84549.5	49557.7	41051.7	66038.1	48079.1	60017.6	45279.4	60344.9	40113.6	47032.5	36513.1	[48][M]2+		15	1	25	TRUE	FALSE
711	M214T260	214.06	214.059	214.06	260.036	256.215	262.325	51	51	13934	2591.75	2973.17	4144.59	4270.04	3884.8	2621.29	2601.22	3800.71	3053.66	2237.26	23119.6	21139.2	26305.3	13818.3	14904.2	15239.7	12441.2	17579.5	35206.9	33587.1	26030.2	24141.4	10914.5	10225.4	16857.7	9869.16	13897.9	8344.42	11310.1	7169.41	10143.2	7446.11		[M+H]+ 213.056	103	1	17	FALSE	TRUE
712	M214T38	214.13	214.121	214.133	37.6555	29.829	57.653	58	53	2734	3449.88	4239.89	4225.11	3066.61	539.594	4133.41	3790.79	4054.07	4454.24	3383.59	12315	7215.39	11232.7	2044.88	8387.69	12502.1	4090.8	8150.41	12549.6	3991.25	6061.63	2543.43	7732.43	7582.45	4296.52	7832.35	6667.21	8084.79	4438.24	4037.12	4836.15	6307.5	[45][M+3]+		1	0	0	FALSE	FALSE
713	M215T248	214.562	214.559	214.564	248.455	240.998	261.865	108	72	5630	1015.75	496.381	897.681	871.398	871.114	988.922	1041.53	762.886	678.734	793.92	12971.2	12407.4	10713	8958.78	11250.1	9748.68	7390.29	16335.5	19773	13080	24210.6	13864.7	8468.54	6907.5	14040.8	7861.7	10731.9	7228.44	11583.2	6568.8	8205.64	6355.38	[48][M+1]2+		15	0	0	FALSE	FALSE
714	M215T557	215.015	215.015	215.016	556.813	541.417	578.09	107	41	1242	1595.11	1968.81	1562.11	2108.9	2097.89	1943.44	1783.18	1940.91	1611.53	1981	2507.86	1456.95	3172.26	3869.43	2904.16	8361.97	2873.16	4182.46	2398.85	3886.88	6301.94	2865.76	359.831	2584.42	2482.22	1782.09	2538.67	2375.09	2787.37	1742.58	4143.33	2114.84			198	7	1	FALSE	TRUE
715	M215T507	215.015	215.015	215.016	506.832	496.599	512.216	55	50	3901	1860.78	6630.6	3289.73	7229.16	6768.02	12957.6	4966.1	8921.59	6317.95	8022.69	13487.1	14465.4	19575.9	6343.45	9516.98	17051.3	18796.3	13208.3	9769.49	12838	16466.5	14029.7	14606.3	11220	7837.15	5242.36	8108.38	4718.76	10178.8	8078.4	10575	6384.3			71	9	2	TRUE	TRUE
716	M215T484	215.015	215.015	215.016	484.066	473.083	494.019	65	61	4421	3098.38	4851.54	3085.94	4942.69	3241.75	5178.31	3741.71	6533.93	3751.3	5947.12	20033.1	15457.1	16483.8	8193.93	13979.3	17198.3	19582.3	17239	8780.93	19070	21611.8	13776.3	6568.36	3588.19	5435.96	2278.11	4861.8	3848.62	6489.64	5020.14	5428.52	3743.08		[M+H]+ 213.999	105	14	1	FALSE	FALSE
717	M215T356	215.052	215.051	215.063	355.832	339.443	381.86	80	70	1312	797.846	1762.06	1816.71	1509.51	783.941	1795.73	1514.38	1546.42	1500.58	1469.64	3975.84	3931.92	4165.17	5547.75	5228.63	5025.69	4367.24	6300.3	6498.68	3918.2	3607.34	3569.87	1537.05	1696.64	830.7	749.949	775.942	855.144	1666.02	750.907	732.55	581.672		[M+H]+ 214.045	97	0	0	FALSE	FALSE
718	M215T247	215.063	215.059	215.068	247.065	235.943	261.865	80	72	4089	18345.4	11007.3	5893.28	12424.9	9649.74	9404.39	18969.4	4457.42	11129.7	5197.01	13971.5	14501.4	14107.1	11186.4	10869	11750.3	9507.85	12489.7	21225	14819.6	19133.9	17308.6	7739.11	6185.3	3162.91	2330.22	3160.4	7730.91	2660.33	702.586	8765.34	7570.58	[48][M+2]2+		15	1	89	TRUE	TRUE
719	M215T14	215.07	215.068	215.071	14.157	12.084	15.757	69	69	412	811.116	993.51	862.415	813.393	781.237	770.755	808.979	795.96	785.436	817.294	804.962	748.131	786.092	877.084	960.977	871.22	967.059	963.453	914.297	1160.03	787.126	866.462	824.955	897.955	994.164	787.965	814.89	852.766	881.556	837.629	934.864	825.408			209	25	35	FALSE	FALSE
720	M215T166	215.07	215.067	215.072	165.949	138.956	183.454	57	53	4980	9279.54	8124.4	8681.21	860.603	8363.82	900.096	9028.21	9208.82	8406.27	8422.56	3181.75	3278.27	5785.41	4373.94	1173.08	5775.72	1736.76	3327.74	13754.4	1610.19	14679.8	3644.96	1393.14	14935.5	2356.05	13626.4	12950.4	16070	2969.53	1334.78	12019.2	14613.9		[M+3Na-2H]+ 148.12 [M+Na]+ 192.082 [M+H-H20]+ 232.075	87	1	83	TRUE	TRUE
721	M215T38	215.106	215.102	215.108	37.5125	28.881	52.129	66	62	5468	1707.15	11359.9	12344.8	10245.8	9330.4	10916.6	9857.11	12557	11192.1	10083.8	38682.8	7586.34	10464.3	11530	10046.1	8045.59	8662.14	8169.5	34591.9	8679.84	38745.2	34483.1	5755.95	11890.2	4091.46	4064.5	6574.28	7322.1	6060.6	7951.07	6305.75	5861.57		[M+Na]+ 192.12	1	0	0	FALSE	FALSE
722	M215T154	215.106	215.104	215.107	154.378	151.431	158.578	41	41	6340	9411.83	9350.98	9022.13	8969.59	9313.31	9017.59	10172.7	9965.61	8595.09	9199.34	15790.8	13301.4	13991.5	14068	21621.7	15642.8	23225.1	19286.4	13725.4	22301.2	24915.2	14241.8	11166.5	15171	10645.5	13938.9	12041	14935.6	3677.71	14120.9	11392.4	13494.3		[M+K]+ 176.136	65	4	89	TRUE	FALSE
723	M215T41	215.142	215.139	215.145	40.968	28.869	63.404	114	64	7518	11279.3	11596.1	1291.59	10493.3	4971.69	11091.2	5448.41	5197.54	3829.49	10273.9	16280	16492.1	16078	18148.6	44669	17558.4	17008.9	29302.8	18315.5	16258.4	17660.8	19528.1	33634.9	68861.4	16533.7	73823.9	35125.7	72426.7	43119	68807.9	41162.9	62988.7		[M+H]+ 214.136	2	0	0	FALSE	FALSE
724	M215T319	215.138	215.132	215.141	318.805	297.48	328.324	68	66	1578	3221.95	3288.37	4363.77	2459.82	5117.85	3423.88	3612.04	1926.65	2439.2	4039.35	3324.16	4008.65	5625.39	2910.2	2690.89	3993.52	4461.52	4044.72	2122.6	3023.01	4339.24	4249.84	13963	8507.22	10356	8412.57	10810.7	10562.2	16806.5	10613.3	11577.4	10719.3		[M+H-H20]+ 232.151	61	2	37	FALSE	TRUE
725	M216T532	215.629	215.628	215.63	532.499	527.427	548.973	43	42	3442	658.147	284.636	485.212	324.998	484.377	436.641	415.095	658.406	431.404	449.969	2880.83	2549.1	3628.96	2787.34	2692.82	2989.72	3126.03	3519.38	3006.56	2965.1	2918.5	2733.86	11991.5	15288.5	13026.7	13234.9	13839.8	13691.9	12840.2	14703	11758.8	13158.2			150	0	0	FALSE	FALSE
726	M216T319	216.122	216.12	216.124	318.971	317.343	322.071	72	72	5238	6182.88	24872.3	11755.2	23317	10395.4	18297.8	20185.1	15958	6354.7	13084	3309.66	3012.2	2827.22	2797.24	2855.47	3104.64	2989.07	2416.05	2651.97	2507.25	3142.15	3658.32	6017.2	5064.94	4761.16	5438.92	5427.1	6317.38	5989.12	4958.99	5648.2	6256.24			61	14	57	TRUE	FALSE
727	M216T38	216.145	216.143	216.148	37.672	28.385	46.614	46	41	2392	2676.94	3263.48	3489.03	2393.37	2911.73	3568.6	2926.69	3026.09	3181.1	3218.06	12290.8	5535.55	10349.1	10270.5	10585.8	11397.4	4417.5	9600.39	9974.26	4033.53	11186	4570.94	8920.72	7906.91	7309.49	6752.96	5736.55	8409.88	11661.8	8194.75	5152.48	7067.7		[M+H]+ 215.144	1	0	0	FALSE	FALSE
728	M217T157	216.949	216.947	216.95	156.867	150.015	160.147	62	62	1409	9071.8	6037.1	6119.66	5206.38	9497.2	9568.36	11298.5	7056.48	8712.52	6481.39	7845.96	6330.93	5113.38	4108.91	3048.86	2689.57	1612.62	2411.54	4188.9	4832.98	5781.01	7047.54	7895.78	3264.84	3704.87	5069.49	6080.74	6617.85	7153.28	5922.52	5589.67	7291.7		[M+K]+ 177.983	46	0	0	FALSE	FALSE
729	M217T181	216.949	216.945	216.952	180.513	172.454	188.825	54	51	2361	6474.55	7515.25	8270.12	4022.98	8108.13	8805.54	9927.5	8919.36	5890.86	4386.42	5950.5	6643.7	1913.43	3158.14	2988.34	3781.57	2134.89	3753.35	3290.82	4286.47	7892.65	2839.15	7585.34	1051.94	3854.34	7161.75	6435.1	5498.66	5087.78	5261.44	5615.48	7718.76			14	0	0	FALSE	FALSE
730	M217T415	217.018	217.015	217.021	415.151	405.582	423.117	43	42	553	911.893	1383.87	1104.37	656.862	607.24	1032.9	646.859	985.369	994.031	610.214	582.2	1357.44	1280.24	4709.66	4982.45	2178.89	3289.69	1746.06	2014.04	542.543	1188.82	868.726	1042.23	1431.91	1035.11	1247.72	1239.42	1097.52	621.071	972.991	644.405	813.839		[M+Na]+ 194.031	41	0	0	FALSE	FALSE
731	M217T247	217.068	217.067	217.068	246.782	239.368	257.281	79	79	86641	120241	80826.9	119721	95805.1	101910	84078.7	128877	124967	60740.2	135989	602531	510915	540878	673913	630757	602563	606188	567349	605511	524939	591556	525910	440298	434362	575857	450625	471084	430241	458129	397035	530560	382056	[49][M]+	[M+Na]+ 194.08	15	57	9	TRUE	FALSE
732	M217T299	217.068	217.066	217.069	299.22	283.186	319.108	96	61	7046	4857.05	5880.95	4622.47	4795.58	4114.66	4368.78	5543.36	5539.41	4949.79	4854.45	13066.5	25301.8	14361	11747.1	10908.2	10730.9	10802.2	46495.7	28571.5	15048.3	12987.2	11794.9	13032.7	13756.1	10006	12766.3	10904.5	13668.6	11695	12439.2	13365.7	14004.3		[M+Na]+ 194.078	23	36	3	TRUE	TRUE
733	M217T36	217.085	217.081	217.087	35.587	29.593	69.575	64	56	8303	512.89	3182.76	2823.67	3474.45	4028.27	3594.86	3694.83	4825.17	9853.31	9126.09	15297	25168	2841.51	25515.1	24012.4	4405.38	26904.9	20724.4	24609.5	4411.74	3977.86	5261.57	76055.4	52935.3	101593	52476.8	65170.4	58792.7	64933.4	57673.8	65065.7	53389.7		[M+H-H20]+ 234.101	1	1	8	FALSE	TRUE
734	M217T419	217.081	217.079	217.084	418.856	415.915	431.529	44	44	1717	1517.26	1616.54	1666.36	2570.01	1397.06	2767.37	1513.27	1517.86	1718.04	1530.93	766.141	1054.08	2819.73	1841.51	2299.23	1979.44	1690.06	2295.67	1535.31	2222.18	1173.23	2897.66	5650.68	6556.95	6956.95	7382.97	7726.88	11403	7351.91	5246.57	6180.78	5346.73			129	1	11	FALSE	TRUE
735	M217T39	217.122	217.12	217.123	39.495	28.815	70.227	77	58	5128	2179.25	10796.7	3662.2	10508.1	4432.75	9809.3	9925.84	9859.26	10137.1	10450.7	19279.6	14707.3	13468.1	11587.1	12759.9	8588.93	15519.7	12766.9	10395.7	12113.7	23014	30176.2	12864.8	18459.6	8347.08	23511	11879.7	21711.4	12775.1	18765.7	14958.6	15502.4		[M+H]+ 216.115	2	0	0	FALSE	FALSE
736	M217T369	217.129	217.127	217.13	369.128	361.932	390.323	77	76	4881	4631.34	3406.89	4827.63	2595.29	4343.11	3248.39	4103.21	3668.45	4342.16	3846.34	5137.15	4527.76	5029.51	6788.1	5309.47	5935.33	5587.12	4754.26	5013.35	4911.16	4636.75	4420.89	12828.8	13199.6	16031.2	15020.6	14642.5	14737	14309.7	12906.5	15281	12522.5			33	17	39	TRUE	FALSE
737	M217T215	217.156	217.153	217.158	214.668	202.73	216.961	50	50	2793	9047.62	7912.39	6151.69	9045.32	6554.29	13802	8333.43	8566.2	7927.1	10321.7	9224.83	7492.45	7587.61	6830.71	8741.57	15355.3	9857.04	6752.33	3682.85	5644.38	5387.84	5946.14	13966.9	20743.5	24993.1	20241	13084	21905.1	26353.9	21786.8	15159.2	20811.7			83	6	43	FALSE	FALSE
738	M218T247	218.071	218.07	218.072	247.24	236.215	250.305	74	74	6151	5732.49	7039.57	5804.09	8157.83	7041.73	5997.28	6584.66	7056.01	6313.06	8575.08	46871.3	40929	29325.7	42045.9	35001.1	32933.6	35222.3	32429.1	34348	40867.7	37733	31599	22639.6	22155.8	29086	25737.1	30263.8	23751.3	26897.3	19369.7	24192.2	19720.1	[49][M+1]+		15	0	0	FALSE	FALSE
739	M218T144	218.117	218.114	218.118	144.345	131.326	148.055	53	42	3005	23159.2	25484	20618.2	29403.4	19471.3	34069.3	32150.4	32474.1	21046.6	33839.1	3792.12	3324.34	6688.19	3394.19	4950.87	1746.25	4492.77	6298.28	3038.53	4132.33	3133.23	2331.89	17304.2	21661.7	17225.1	21198.7	16139.4	18086.4	15331.2	15919.3	15951.2	14591.1			111	0	0	FALSE	FALSE
740	M218T435	218.149	218.148	218.15	435.419	432.381	444.808	83	82	29158	21314.5	20523.6	21025.6	20523	19709.5	20384.2	22605.2	19764	20685.4	20333.4	31716.4	31158	35879.7	31807	31778.1	29168.6	26467.8	26503.2	30167.1	29592.3	31010.7	34418.2	135548	102744	147055	104999	135871	102640	134807	108936	136049	109306	[50][M]+	[M+NH4]+ 200.115	43	69	56	FALSE	FALSE
741	M218T516	218.149	218.148	218.15	516.073	512.88	530.498	49	41	2017	3423	1939.14	2885.07	2242.85	3498.74	2026.08	2517.51	2192.53	3195.96	2276.27	6720.37	5771.5	1965.7	7267.22	9309.19	9762.87	7138.16	2208.18	5296.68	6987.39	6573.47	5187.8	50625	22286.7	7980.06	22817.5	47801.1	18208.1	6269.33	24208.5	11758.9	14119.3			19	28	63	FALSE	TRUE
742	M218T68	218.21	218.208	218.213	67.8325	60.939	73.696	64	61	1143	9008.63	6511.84	4806.61	9773.28	10338.7	5899.51	9719.25	6541.45	6967.36	10112.9	3537.44	5619.93	5001.48	3398.53	5618.38	5606.23	7435.76	5860.55	4118.07	5332.66	5814.02	4369.05	2931	5146.57	6045.14	7033.34	5329.28	5408.14	2606.17	6563.9	5877.23	3246.84			63	0	0	FALSE	FALSE
743	M219T332	218.943	218.941	218.945	332.108	327.315	356.491	84	76	518	565.329	921.757	825.58	782.607	659.591	1086.2	659.145	940.166	605.26	734.773	1754.29	1342.72	1560.6	2023.53	1571.6	2899.24	2967.42	1624.04	1649.19	990.794	1403.09	1465.02	1518.5	1565.07	1533.37	1146.69	1648.47	1288.6	1566.8	1237.83	1244.32	1210.44		[M+Na]+ 195.953	89	0	0	FALSE	FALSE
744	M219T429	218.974	218.972	218.975	429.432	426.681	448.199	85	81	1292	3880.51	4062.85	5254.22	3749.23	4827.7	3515.16	4535.36	2685.64	4191.21	2660.37	4151.26	3703.58	4000.15	3434.56	3809.12	4282.62	3031.73	2609.71	4911.39	3818.97	4316.39	4665.41	1978.86	2899.98	2603.24	2889.55	2436.18	2840.94	2329.54	2060.6	1743.69	2255.73		[M+K]+ 180.009	78	0	0	FALSE	FALSE
745	M219T296	219.017	219.014	219.021	295.685	274.448	307.014	82	77	1233	3636.93	3017.28	10612.6	8707.52	7852.44	10228.2	11792.2	6891.64	4960.46	5075.75	8116.61	9096.59	5335.68	6382.83	4483.6	6848.08	2442.49	5434.12	9078.6	6761.65	7462.61	5099.11	4088.71	3423.92	8844.65	6704.85	4059.07	3941.53	7424.11	5657.37	3179.08	3439.35		[M+3Na-2H]+ 152.069	23	28	14	FALSE	TRUE
746	M219T357	219.023	219.022	219.024	357.142	351.612	376.238	86	81	42034	5202.43	3170.94	7307.63	3327.58	6161.32	3044.89	3262.76	3386.53	5666.3	3029.67	24973	21379.2	20607.7	21681.3	27783.7	30235.5	28528.8	26777.3	28031	27161.8	27385.5	22717.7	5925	1677.87	6653.38	1978.48	5830.07	1471.05	6133.63	1832.58	5563.76	1678.34	[51][M]+	[M+Na]+ 196.031	97	30	14	FALSE	FALSE
747	M219T385	219.046	219.045	219.047	385.376	378.303	392.313	49	48	981	1624.32	1919.98	1500.71	805.49	1709.94	1898.74	2095.43	2089.17	1717.14	1358.9	3534.47	3874.38	2675.81	3889.18	3831.01	3945.55	3849.12	1627.12	3173.66	3384.24	2087.15	3271.31	3480.24	3633.9	4546.73	3437.27	5001.53	2238.62	4329.41	3110.88	6782.04	2920.18		[M+CH3COO+2H]+ 158.018	165	0	0	FALSE	FALSE
748	M219T246	219.073	219.07	219.084	246.024	212.786	264.888	114	80	60041	220383	387458	286288	200790	258920	75708.3	357839	348485	233823	282130	8164.39	10244.9	9976.45	9365.79	10387.7	13342.8	12562.3	13602.7	12974.5	12835.1	44660.1	11976.2	6725.82	5080.58	5992.86	4754.93	5279.76	4916.39	5549.48	4664.72	5248.19	4611.59	[49][M+2]+		15	17	20	TRUE	TRUE
749	M219T185	219.101	219.1	219.102	184.755	183.445	188.373	79	79	53027	18030.2	18126.3	9147.14	12297.6	8856.61	14800.6	16449.2	13808.2	12247.1	11496	76076.7	76939.4	71295.7	70173.2	72618.4	72139	73856	72024.1	67201.6	69750.6	76780.3	72636.1	22232.9	11288.7	17423.9	13055.6	12299.3	21699.1	13708.8	23421.9	13361.2	10143.6	[52][M]+		29	58	222	TRUE	FALSE
750	M219T413	219.097	219.094	219.1	413.38	406.499	434.911	84	73	3415	4285.36	6204.54	4460.09	2888.64	1983.8	6652.54	6898.51	7163.26	3129.15	5466.77	6011.87	3449.89	3464.44	6660.95	4091.5	5018.58	5308.85	4069.79	4107.85	4097.95	5227.37	4159.67	10935.6	12655.6	11387.3	13769.3	16506.9	12230.6	11358.2	12363.6	9408.87	11275.8			41	5	14	FALSE	FALSE
751	M219T138	219.101	219.1	219.102	137.509	120.079	150.938	89	66	10594	12745.1	12316.3	11652.3	12547.5	11456.4	12631.2	12484	13435.5	12143.4	12518.4	103973	68791.1	109163	100043	34735.5	124691	110439	49295.6	70285.5	42548.2	118016	94028.9	18369.1	22684.1	24205	22711.3	22181	22414.4	12857.5	21778.7	18447.2	21035.9			60	60	232	TRUE	TRUE
752	M219T200	219.101	219.096	219.102	199.614	197.771	210.456	43	43	6146	7363.68	8092.15	6837.94	7509.3	6550.49	8378.9	7551.16	7838.73	620.438	7774.57	18660.5	18454.1	19313.5	18739.1	20281.8	18267.8	20524	18524.8	17785.7	17796.7	20390.3	16498.2	7053.98	5507.74	6248.35	4817.08	7068.02	5570.98	7406.26	6467.2	7006.95	6246.48		[M+Na]+ 196.11	30	58	232	TRUE	TRUE
753	M219T34	219.116	219.112	219.118	34.078	27.834	52.09	62	60	22278	22876.2	22398.5	24672.7	20399.1	460.347	20999.6	22041.2	23582.9	23822.8	23294.5	15899.6	13866	16668.5	21374.7	19288.2	20731.4	18734	11786.2	22709.4	20150.1	23020	16801.1	93218	67497.3	99716.6	72228.8	97755.9	71465.8	97743.9	79324.5	447.17	73643.3		[M+H]+ 218.112	4	6	220	TRUE	FALSE
754	M219T273	219.133	219.131	219.135	273.071	269.048	275.618	64	63	5120	8750.49	10722	4614.1	6196.23	8813.83	7088.44	7234.04	7471.58	6849.02	5967.34	6437.63	8688.55	5879.3	8067.72	10850.6	5019.15	7599.48	4748.79	6472.56	5219.22	5716.38	6790.83	22136.4	21629.6	22832.7	21206.3	24162.4	22101	20152.7	22899.1	25323.1	19451.4			113	25	133	TRUE	TRUE
755	M219T456	219.133	219.132	219.134	455.524	450.24	468.967	61	61	683	1481.53	1353.7	1154.05	1664.16	1496.55	1705.26	1696.72	1745.01	1934.84	1684.77	1821.99	1691.34	1531.53	2195.07	2416.74	2522.38	2711.24	2638.6	2378.96	1810.59	2649.22	1797.23	3238.63	4489.45	4118.43	4167.21	3865.79	4648.65	4179.27	4538.21	3540.26	4051.51			156	0	0	FALSE	FALSE
756	M219T436	219.152	219.149	219.154	435.553	433.03	448.633	60	59	2165	2258.32	3602.21	2820.85	2344.26	2412.32	2836.58	2783.13	2694.68	2578.81	2176.06	3015.1	2541.94	2828.64	3197.38	3168.68	3058.28	2939.92	2649.62	2912.11	2963.33	2904.86	3051.51	9867.04	8190.62	11227.9	8110.44	10594.5	8496.1	9382.54	8427.68	9235.88	8450.6	[50][M+1]+		43	0	0	FALSE	FALSE
757	M219T28	219.174	219.171	219.176	27.655	13.361	57.556	89	82	103066	270055	288976	210089	188091	273140	285050	230497	162527	142445	270388	7148.54	5544.96	5336.27	6725.12	6046.63	5795.24	4458.75	5738.7	5081.45	5612.58	6030.17	5376.53	153434	100019	142267	111015	133126	112145	191800	152391	172525	211361	[53][M]+		55	1	134	TRUE	FALSE
758	M220T357	220.026	220.026	220.028	356.827	351.612	360.498	53	53	1672	458.408	237.855	626.23	286.091	544.21	308.027	284.521	320.777	532.695	286.333	1400.35	1316.4	1350.16	1375.63	1754.23	2022.91	1963.99	1385.44	1868.01	1583.38	1399.71	1496.49	400.844	142.142	645.316	88.3394	467.598	125.462	476.292	95.0502	379.909	222.346	[51][M+1]+		97	0	0	FALSE	FALSE
759	M220T429	220.08	220.078	220.082	428.852	416.334	432.018	63	60	635	1669.04	1168.03	1862.81	691.24	712.229	920.93	1504.29	2362.14	1656.45	537.56	1169.22	1369.99	1658.96	1028.31	1659.67	1223.28	1370.65	985.218	590.18	1430.54	2054.08	871.823	2631.49	2277.37	2238.69	2323.91	898.743	2267.82	2432.68	2387.95	1895.84	2652.6		[M+K]+ 181.12	78	6	11	TRUE	TRUE
760	M220T44	220.096	220.094	220.104	44.15	33.263	65.997	45	42	9446	60213.9	54772.6	3572.08	55443.2	54606.7	58877.3	51298.7	56895.7	58721.9	56294.4	3287.65	12215.3	12549.4	12619.2	3443.38	2621.58	13020.1	2452.6	3367.09	11574.7	2691.51	1779.4	33536.6	13698.5	15690.6	12856.5	32596.9	27879.5	14391.8	24804.8	32076.2	25313.4		[M+H-H20]+ 237.102	7	0	0	FALSE	FALSE
761	M220T185	220.104	220.099	220.109	184.764	158.28	203.404	83	72	6349	3240.66	12301.5	2850.92	1549.53	2335.04	10002.4	979.027	1741.2	3649.71	10085.2	9853.45	16135.5	11536.8	10481.3	11231	11373.5	16321.3	13987.2	11617.7	17186.1	11162.7	9636.82	3230.58	4222.82	4910.31	4563.69	3633.21	3469.84	5814.39	5268.43	5063.27	4071.58	[52][M+1]+		29	0	0	FALSE	FALSE
762	M220T356	220.105	220.104	220.118	356.386	350.72	359.977	86	82	5582	18227.5	7466.81	20119.8	8166.14	20177.6	7804.27	7442.8	9302.83	19044.1	8847.2	5763.62	5277.5	6097.45	5916.99	6959.1	7306.93	7394.36	6155.82	5994.58	5689.41	6072.23	5638.79	8614.67	3730.24	9461.07	4008.68	8781.45	3525.64	8869.87	3298.18	8778.77	3554.31		[M+Na]+ 197.116	97	29	30	FALSE	FALSE
763	M220T273	220.117	220.116	220.119	272.557	269.462	274.162	68	68	4099	2647.73	3255.89	1283.21	3512.02	3076.66	3247.7	3259.51	6082.72	2325.88	4666.68	3992.06	3640.57	5288.62	5288.56	6085.2	6075.32	6281.98	4106.84	5629.11	3873.47	5390.84	4046.08	13467.2	7679.17	14211.9	8135.79	13856.9	7676.23	13944.2	8666.51	14985.8	7032.99		[M+H]+ 219.11	99	17	28	FALSE	FALSE
764	M220T61	220.119	220.117	220.12	61.082	44.763	67.422	66	51	13822	9918.75	274298	213123	264736	296596	282092	80168.4	269504	122568	252625	33050.7	20527.5	32491.9	46534.2	20535.9	20044.4	30816.3	40149.2	36040.9	16305.9	26995.5	45158.4	90307.8	99719	136224	52967.7	125089	88984.5	122517	98336.9	47640.4	88695.6			57	26	88	TRUE	FALSE
765	M220T168	220.169	220.167	220.17	168.373	159.55	172.733	116	82	61931	132757	96146.5	123429	112739	96432	151424	110559	104288	80383.5	164587	53574.2	49667.8	53362.2	58623.5	59511.6	56874.6	63066	48691.7	104308	54187.9	56665.2	56780	5096.38	7071.41	5639.67	8457.27	6358.54	8970.66	4263.17	5897.56	4084.17	7230.23	[54][M]+	[M+H]+ 219.157	82	48	188	TRUE	FALSE
766	M220T27	220.178	220.177	220.182	27.106	1.083	29.58	83	73	12976	32302.6	34107.8	29092.7	22960.8	34010.6	35607.3	28259.6	22599.6	19067.1	35178	1523.21	1545.66	1584.75	1672.64	1805.99	1776.15	2011.15	1392.6	1437.38	1350.05	1249.31	1474.97	22011.2	15471.5	20344.8	17268.3	20347.3	14504.5	23400.1	18460.5	22484.8	24799	[53][M+1]+		55	0	0	FALSE	FALSE
767	M221T362	220.97	220.959	220.972	362.377	355.412	368.282	62	55	567	528.98	630.754	744.202	951.3	592.508	413.755	683.669	589.149	619.937	795.314	808.305	1037.39	1331.24	1021.79	2384.58	2356.59	598.513	418.312	1976.87	1940.02	2556.43	1847.54	598.609	958.386	1762.31	1086.87	1461.04	877	1590.26	757.065	994.686	851.535		[M+Na]+ 197.983	140	0	0	FALSE	FALSE
768	M221T160	221.032	221.031	221.034	159.71	156.599	162.232	75	75	2953	6095.76	5715.41	12180	4560.79	9095.35	3822.45	3834.84	3281.37	7234.31	3226.99	3109.54	2822.87	3248.9	2543.53	2172.97	2727.96	2087.52	2281.51	4844.91	2676.98	2626.84	2589.98	3693.77	4382.77	5586.56	4690.55	2495.14	4125.69	3842.34	4344.76	2592.56	3226.27			9	1	92	TRUE	FALSE
769	M221T421	221.076	221.075	221.081	421.077	419.674	428.79	42	42	1049	1597.47	2988.79	1202.12	1880.65	1700.66	1355.09	1025.92	1747.12	1308.52	1060.43	1814.27	849.219	1468.3	1725.24	676.97	1081.65	2045.7	1090.18	661.834	1415.63	928.731	746.214	4065.41	3487.14	4567.66	3957.73	3676.8	3388.28	4761.77	3858.31	5291.35	2894.56			114	0	0	FALSE	FALSE
770	M221T33_1	221.095	221.092	221.1	33.461	29.593	49.266	50	46	11278	6985.61	6291.21	6529.87	5608.49	6334.35	6028.08	6010.94	6481.14	6258.4	5725.88	5698.24	44961	5159.44	44657.3	4161.94	2172.1	45713.4	2546.12	40289.2	4668.98	3621.94	47147.2	12861.7	12962	11436.7	1249.74	10531.9	12515.1	11785.5	14197.9	10771.9	1868.5		[M+K]+ 182.125	4	0	0	FALSE	FALSE
771	M221T33_2	221.132	221.13	221.134	32.504	28.022	48.736	71	67	11278	8868.79	1415.78	7764.9	1219.91	1323.62	7512.79	1153.24	7646.94	8661.71	7551.49	47850.6	34872.6	47029.3	47528.9	41272.6	38309.3	48531.6	44610.5	43948.3	31260.7	57984.2	55007.3	14181	14213.4	13443.2	14214.5	12283.3	9336.82	14171.3	15726.9	13319.8	16321.6		[M+H]+ 220.125	3	1	74	TRUE	TRUE
772	M221T153	221.132	221.131	221.133	152.814	129.511	156.967	56	49	8067	9872.7	9988.93	10562.3	10309.4	9481.84	10702.8	9254.68	9894.05	9640.38	9895.29	59212.2	26250.3	39834.1	24164.1	35685.8	25524.6	33378.6	38658.6	18878.8	24741.8	21864.9	22022	11942.6	12464.7	11936.5	12100.1	11588.9	11249.1	12319.6	12088.6	12567.2	11462.6		[M+CH3COO+2H]+ 160.096	65	16	105	TRUE	FALSE
773	M221T169	221.172	221.17	221.174	169.355	160.25	173.545	95	70	7275	16905.8	12717.2	12242.9	21399.9	11418.1	13198.9	21731.9	13916.2	9938.82	13219	7878.23	8270.53	9122.04	8885.56	9704.97	10477	16682.8	10188.5	10461.7	9018.75	9489.01	10264.6	697.954	1187.32	649.484	1138.32	4300.99	6068.4	5794.09	1143.6	4199.29	5794.96	[54][M+1]+		82	0	0	FALSE	FALSE
774	M221T275	221.185	221.183	221.187	274.966	273.131	276.621	82	82	4953	9429.09	9054.08	9002.79	7344.83	10631.2	6830.65	5104.09	5624.57	7072.26	5514.55	8128.52	6371.29	5972.78	9200.66	8865.79	11892.1	13415.6	9889.34	8575.68	9402.21	7687.98	6166.36	4771.23	7272.19	8761.96	7056.82	7442.75	7341.64	7435.48	7931.97	8147.48	4649.17			27	4	211	FALSE	FALSE
775	M222T248	221.572	221.571	221.574	247.667	239.918	262.448	89	61	3947	170.441	256.775	371.098	243.402	314.976	369.677	270.988	362.518	360.096	308.117	7519.41	12776.7	7792.96	6395.12	7535.98	9162	6670.87	10171.9	11131.7	12111.5	9766.9	10554.1	387.28	417.996	515.594	213.081	336.099	315.989	30.0833	174.003	217.788	226.917			15	0	0	FALSE	FALSE
776	M222T149	222.019	222.018	222.02	149.22	143.514	171.804	90	76	2685	33409.3	19795.6	11012.4	24156.9	24764	28371.1	17088.8	19833.9	18181.6	19035.5	9532.47	10407.2	11573	10727.9	17924	4888.34	13476.1	11995.1	6538.05	18286.7	7270.74	9753.57	17751.8	15646	18694	11844	19576.7	23452	18152.5	17853.8	20630.7	24907.8		[M+K]+ 183.056	24	2	23	TRUE	FALSE
777	M222T255	222.057	222.055	222.059	255.347	244.863	263.484	42	42	1542	316.765	1456.12	1436.25	1412.76	1312.98	1647.54	1648.04	1199.06	1047.12	1308.31	1825.75	2104.66	1944.19	2062.62	2296.4	2204.24	2049.88	1592.88	1250.88	1643.48	2623.86	2126.19	494.526	822.588	1239.88	859.634	1156.89	793.255	1229.07	1093.45	952.647	727.673			152	0	0	FALSE	FALSE
778	M222T33	222.135	222.133	222.14	32.8125	27.572	42.431	66	65	3076	4741.06	3650.18	4823.55	2945.37	3973	2817.75	2776.71	3102.07	5668.89	3527.37	11164.4	5807.4	13065.3	13533.7	6824.86	4380.16	6572.87	11652.4	8955.82	16089.2	8465.64	11486.1	4450.88	1265.37	4854.52	4804.09	5738.22	4744.29	4890.22	936.768	3996.37	1970.65			3	0	0	FALSE	FALSE
779	M223T375	222.987	222.984	222.988	374.742	371.264	392.594	47	46	18012	182.233	246.31	260.639	336.998	149.414	360.211	359.93	136.72	191.964	242.739	8846.16	10536.8	7944.34	6564.83	7739.78	9682.69	11008.3	9448.34	9176.55	22583.1	10794.6	11365.3	3504.61	857.467	2417.96	909.95	2061.55	691.93	2832.12	683.581	2332.34	594.943			133	8	10	FALSE	FALSE
780	M223T350	222.988	222.986	222.996	350.469	324.54	360.498	70	61	18441	2710.57	3408.35	2192.72	2831.46	2911.36	3685.25	2406.58	2651.4	3003.09	2403.7	10333.1	10227.1	8212.65	679.115	10318.3	10081.2	11467.5	5396.14	6115.06	7094.87	12197.2	7000.59	86498.9	50064.3	84572.4	87822.1	92752.3	81907	92899.4	79592.2	50133.2	75980.2			79	3	14	FALSE	TRUE
781	M223T27	223.063	223.061	223.064	27.417	12.482	31.623	67	54	6151	12222.9	6376.29	7553.56	7276.56	7187.47	8387.58	9147.59	10293.4	9348.25	13625.7	1912.9	12169.8	2222.4	9496.63	1671.45	8674.36	9330.41	8769.12	1775.88	1879.75	10597.4	2023.22	11067.2	3995.15	7184.95	7135.47	7183.98	5340.45	6288.48	7272.28	9830.83	8876.88			55	0	0	FALSE	FALSE
782	M223T247	223.064	223.062	223.067	247.242	241.378	262.325	62	58	1709	1825.4	2466.75	1925.85	2250.3	2407.67	1658.73	1997.68	2018.44	2187.06	689.544	3042.03	4102.38	3845.47	3087.65	3836.94	2642.44	1490.13	3358.63	4885.16	4271.29	2245.44	4311.47	2158.34	2051.83	2146.03	2557.69	2955.64	2536.95	4701.5	2316.56	3482.74	2854.06		[M+H-2H2O]+ 258.076	15	0	0	FALSE	FALSE
783	M223T312	223.095	223.093	223.097	312.021	308.897	314.531	50	50	1760	2174.41	929.861	2935.73	1214.13	1667.72	2630.42	2414.76	1136.89	1071.55	2543.1	663.857	632.435	1344.19	810.377	629.379	548.184	651.124	1187.73	526.059	1131.6	507.316	1244.13	1264.13	1036.75	1476.29	1115.6	1080.66	962.207	1198.73	1220.92	1044.06	962.858		[M+K]+ 184.14 [M+Na]+ 200.107	66	3	31	TRUE	TRUE
784	M223T268	223.107	223.104	223.108	267.761	263.013	277.015	47	46	7645	1670.08	1302.94	1590.81	1667.56	1673.22	1318.92	1441.16	2542.48	1399.09	1086.99	3310.23	2883.83	2849.06	3958	4009.97	4432.04	3889.25	4277.08	3172.25	2682.86	2967.34	3156.28	5377.49	5741.35	5265.63	5602.34	5022.15	6358.01	5861.4	6644.65	5982.98	5862.89		[M+H]+ 222.102	48	5	31	TRUE	FALSE
785	M223T35	223.111	223.109	223.113	34.794	29.593	54.917	81	70	5468	17923.4	9437.74	2379.92	10914.6	11917.9	13795.5	13360.3	14444.8	1852.03	17623.2	30042.1	24740.8	18874.5	72508	32775.1	30328.6	34787.9	17116.8	22589.1	21998.8	18945.1	17486	31517.8	13525.4	28293	10739.6	2062.22	10328.1	31743.7	8873.07	35148.2	9877.26		[M+Na]+ 200.12	1	2	132	TRUE	TRUE
786	M223T153	223.132	223.131	223.133	153.111	149.598	156.017	77	77	48512	163711	160113	161310	138717	154226	156579	136840	162790	173473	155509	59271.5	54542.3	49377.8	72694.7	67620.1	68599.7	67054.9	59787.1	50631.9	51659.8	56341.9	49332	190017	332945	180015	358009	182692	382204	224650	407382	192555	374343		[M+H]+ 222.127	65	43	694	TRUE	FALSE
787	M223T172	223.132	223.119	223.133	172.31	166.058	195.394	48	44	11248	43128.8	31650.7	23013.2	31975.9	24268.2	21717.8	38476.5	36892.6	38572.9	22001.3	19024.9	20499.2	20550.3	20041.1	23389.4	23991.3	26624	21973.9	21413.6	19255.1	22097.9	22076.9	37422.5	79746.4	17676.2	17486.7	10534.9	17316.6	10125.8	25374.7	20970.8	20115		[M+H-H20]+ 240.142	10	26	336	TRUE	TRUE
788	M223T33	223.147	223.146	223.15	32.788	27.572	45.653	65	62	6151	2565.88	8486.26	11898.4	9811.88	1959.17	12457.1	12468.3	13511.4	13801	16259.7	19330.6	20662.9	19288.8	32102.9	34265.1	36363.9	17782.4	16218.2	23318.4	21200.8	29540.5	35980.1	29316.6	25175	24407	26347.5	25674.1	3073.99	1376.13	3873.98	31416.8	27060.9			3	14	66	TRUE	TRUE
789	M224T170	224.091	224.088	224.101	169.907	155.067	200.494	85	81	2911	3324.01	3341.84	3814.19	2078.6	2811.55	2863.66	2972.85	3042.96	2577.52	2159.66	4853.58	3737.86	5184.67	5124	6462.59	6591.53	7517.67	4516.68	5151.23	6337.57	7730.04	4999.76	2665.9	3075.44	1083.77	1509.91	2487.02	668.966	2476.16	9263.75	2088.79	2516.32			82	1	41	TRUE	FALSE
790	M224T447	224.112	224.109	224.115	447.238	441.431	463.346	67	65	1408	976.915	1378.35	1265.29	1440.3	1153.75	1560.14	1470.37	1501.71	1141.39	1557.49	2002.3	1847.55	2082.61	2245.13	2283.77	2310.01	2686.21	3264.66	1753.49	1648.8	2450.05	1442.86	1556.19	990.462	989.764	1128.57	1139.52	674.522	1115.01	1190.42	1597.87	609.73			142	1	8	FALSE	FALSE
791	M224T35	224.115	224.113	224.119	34.6895	30.185	55.598	50	47	2734	4714.9	3457.94	3229.02	3124.96	3747.09	3714.13	4374.5	4404.84	4813.24	5366.36	6307.52	5584.38	2928.7	7965.73	5324.71	6574.24	11507	3416.09	12149	5029.62	4430.21	7987.67	7689.02	1534.07	6506.52	7118.76	7076.06	3125.95	5911.92	1140.36	7054.71	7178.54		[M+Na]+ 201.127	1	0	0	FALSE	FALSE
792	M224T210	224.127	224.126	224.128	209.994	205.285	219.6	61	58	11476	1996.8	1619.95	1846.86	1666.86	1979.36	1485.07	1763.38	2283.37	1425.17	2006.06	12708.6	11342.4	11751.4	12656.5	12923.7	12819.7	12897.9	11716.2	9959.83	11553.7	12769.6	11568.8	839.282	690.471	779.259	789.987	739.849	710.959	1065.65	893.142	819.623	874.697			72	28	104	FALSE	FALSE
793	M224T154	224.136	224.133	224.137	153.785	150.066	170.89	44	44	5817	16659	19588.8	18559.3	17013.2	17800	19534.8	15780.8	17422.9	20012.6	18584	8802.7	7689.27	7687.52	13004.6	9906.04	9239.64	9755.18	10708.7	8121.62	8124.12	9701.54	7897.74	23127.3	42466.3	29966.4	38587.7	23993.7	39593.1	24821.5	42507.3	31994	35414.5		[M+H]+ 223.131	65	12	76	FALSE	TRUE
794	M225T250	225.044	225.041	225.046	249.976	243.251	262.825	66	56	2050	555.708	774.25	1050.38	550.099	578.192	755.567	513.383	552.008	832.39	544.381	5512.82	3595.48	5897.29	4132.14	4006.96	6743.86	3550.5	2535.35	2552.87	5721.34	3473.69	2458.7	2402.37	2046.16	2860.86	2667.31	3359.76	1574.92	2598.42	2028.01	2302.19	2188.21			75	0	0	FALSE	FALSE
795	M225T36	225.09	225.087	225.092	35.579	30.071	56.001	64	59	7518	9974.88	7668.64	9002.1	7305.39	7287.16	6880.49	6976.24	1593.4	8413.84	7831.67	8202.17	4576.51	7576.34	4884.67	57009.9	2846.25	3774.75	5978.99	52624.8	4765.28	4930.09	60932.7	23100.4	7440.32	4018.83	3106.07	10603.1	3131.3	7281.98	9069.36	5919.27	1991.28		[M+K]+ 186.135	1	0	0	FALSE	FALSE
796	M225T163	225.091	225.089	225.094	163.295	146.329	172.497	45	42	4473	3122.98	7279.78	1674.06	39439.4	3249.76	44153.1	4153.1	4553.23	4246.51	3358.33	4831.53	7468.5	2300.02	6195.57	2592.07	19844.3	2918.44	20411.2	4125	2585.22	18481.5	3498.65	2665.91	16029.3	9513.97	15159.6	8830.44	17558.8	10734.7	17463.4	11245.7	1885.79		[M+K]+ 186.126	9	0	0	FALSE	FALSE
797	M225T39	225.127	225.125	225.128	38.99	29.593	53.54	90	77	10694	2063.86	2290.16	7084.51	2954.7	4774.46	2992.4	1521.01	1912.77	5112.36	2978.32	91976.9	32556.9	61233.5	60777.9	27694.2	60161.3	64016	57021.5	65474.3	72962.9	84692.5	89702.9	25198.2	20934.2	1715.84	21740.6	2834.94	24053.5	25404	19231.6	29014.3	17339.2		[M+CH3COO+2H]+ 164.09	2	3	74	TRUE	TRUE
798	M225T70	225.127	225.126	225.128	70.4945	55.201	83.112	54	43	8266	4348.39	7347.75	4765.98	6516.69	3728.85	6173.87	6358.8	5697.11	4239.73	5413.36	43043.6	41636.2	34669.9	76947.8	87117.2	51271.9	103843	45506.6	33029.8	23308.3	4815.3	45198.2	6213.02	5972.86	5566.38	5593.65	5558.66	5759.95	5398.22	5540.92	6689.74	4977.32		[M+H]+ 224.112	77	3	74	TRUE	FALSE
799	M225T199	225.127	225.125	225.131	199.372	195.67	212.967	50	49	3752	5649.32	5695.13	4578.58	5187.62	3672.57	4831.87	4723.89	5815.31	4250.77	4647.93	6500.2	6096.49	4909.06	5483.03	5445.6	6170.41	6917.88	6206.34	5972.6	5505.01	6120.59	5454.88	3104.65	4956.05	4085.56	4879.12	4265.01	5119.13	4531.3	4578.08	3514.53	4790.64		[M+CH3COO+2H]+ 164.091	30	0	0	FALSE	FALSE
800	M225T111	225.148	225.146	225.149	111.217	104.502	116.573	41	41	11403	5750.63	23612.3	6358.32	20665.3	5791.51	19537.3	19441.6	18773.9	5711.68	19429	34799.3	40425.4	22696.5	47193	41843.2	31398	41004.6	47854.4	44759	32257.3	31337.9	22052.3	9998.6	10531.9	9188.43	10369.2	8717.11	9852.62	10931.2	9920.05	10382.2	9144.57		[M+H]+ 224.14	134	34	139	TRUE	FALSE
801	M225T35	225.163	225.162	225.164	34.6715	29.985	47.654	58	56	4101	5144.49	5493.3	5266.66	4278.15	5225.68	4165.33	3627.91	2360.56	5176.08	4118.06	15661.9	25732.7	27213.7	16720.4	34875.5	27204	8653.57	13183.2	23124.8	24389.6	19518.9	30045.5	5409.83	7169.53	5024.03	7809.15	7199.15	3693.03	8228.36	3500.93	5439.38	3723.28			4	15	79	TRUE	TRUE
802	M226T376	226.049	226.047	226.055	375.644	371.264	393.472	52	44	1238	1151.62	857.052	1064.83	1101.1	1026.64	1376.07	694.864	599.625	1211.9	844.928	1547.81	2096.44	676.084	2325.9	2214.6	2786.67	1949.43	1610.18	2090.73	2628.2	1669.1	2425.7	2348.12	1637.12	1900.75	1586.67	712.887	1882.9	2359.97	1847.73	2278.28	1673.8		[M+K]+ 187.084	34	0	0	FALSE	FALSE
803	M226T324	226.091	226.09	226.093	323.522	321.969	326.159	70	70	5205	409.88	506.198	483.88	552.913	477.335	483.27	155.608	320.651	673.062	491.794	4016.43	3972.43	3604.3	3562.93	4365.15	4183.27	3848.55	4086.41	3159.79	3279.88	3804.03	5240.47	5354.73	2055.05	4042.36	2112.05	3929.83	2061.39	4644.17	2952.82	4458.09	1907.12			45	7	39	FALSE	FALSE
804	M226T39	226.13	226.126	226.132	38.799	29.593	55.206	57	54	3417	4091.82	4413.87	3750.48	4155.52	4571.4	5401.39	5443.35	6168.33	739.944	4622.87	22939.1	15176.7	11867.7	16764.1	22666.7	9212.09	15033.8	19649.1	8201.22	9785.34	17838.3	15376.6	5025.45	6438.5	5769.19	5664.69	5726.98	3779.86	6094.23	4516.51	5310.12	1790.23			2	0	0	FALSE	FALSE
805	M226T382	226.19	226.189	226.194	382.493	373.241	387.097	70	70	1878	6024.74	5259.84	6038.34	5466.84	6471.61	5089.95	4997.83	5301.61	6405.73	5253.68	4968.32	4126.62	4252.93	4422.61	5429.19	4403.08	4593.77	4242.41	4912.28	4759.86	4530.56	4474.98	875.681	889.404	1427.17	1450.05	1182.58	1241.6	1064.57	924.62	1317.58	1459.08			80	11	13	FALSE	FALSE
806	M227T327	226.971	226.969	226.972	327.496	325.334	343.867	125	78	1736	614.25	1296.23	1149.92	1969.72	1482.26	702.364	2345.65	1130.27	1065.81	1706.93	4175.78	4838.63	4472.03	5727.73	5353.45	6691.95	6244.56	5045.93	5375.92	5229.52	5046.99	4299.01	3589.19	4957.45	4051.1	3299.81	4598.26	4571.34	3890.54	3747.74	3452.94	3260.07		[M+H-H20]+ 243.976	96	1	3	FALSE	FALSE
807	M227T357	226.992	226.988	226.993	357.316	351.612	375.473	87	82	1909	4869.65	4452.56	5290.1	4989.63	1678.09	5235.27	2772.01	4107.39	4652.97	3313.19	5679.46	8548.56	10198.2	5168.5	8166.61	10222.9	10223	9120.31	7257.61	6777.81	11405.1	8106.74	12627	12911.3	12837.6	12905	12991.3	12301.5	12418.1	11855.4	12607.6	11339.3			97	0	0	FALSE	FALSE
808	M227T399	227.033	227.032	227.034	399.149	390.88	409.974	65	62	940	393.244	358.641	305.307	315.067	192.953	387.905	320.229	300.585	297.173	221.172	2310.47	2220.12	2188.57	2038.87	3015.48	2229.27	2264.41	2260.82	3505.84	2547.94	2418.59	2487.5	316.778	209.189	284.1	295.265	243.075	228.479	217.51	248.987	227.96	256.309		[M+K]+ 188.068	67	0	0	FALSE	FALSE
809	M227T323	227.078	227.076	227.081	323.384	322.057	330.729	56	56	1650	1327.35	1843.56	2215.62	1646.97	1320.46	1403.16	1862.11	1521.36	2263.66	1113.59	952.562	1010.8	2166.3	1667.07	1894.18	2120	2466.95	2538.81	2816.35	2120.17	1883.3	1139.25	1149.88	922.471	879.731	1022.63	804.551	599.925	883.932	958.005	983.954	1198.54			45	3	7	FALSE	TRUE
810	M227T414	227.102	227.1	227.103	414.184	407.756	428.653	76	73	1507	1216.78	1988.66	3811.49	2459.06	2678.18	2299.44	2846.77	1486.43	1795.84	2029.88	3597.89	3212.09	2925.15	2505.8	3969.64	3821.41	3652.57	3760.24	4215.33	3026.67	3691.32	6388.1	5842.26	8414.05	7068.23	9072.7	7519.02	7223.4	6739.37	6993.15	5848.75	9573.65			41	4	8	FALSE	FALSE
811	M227T40	227.106	227.105	227.107	39.614	32.18	54.982	86	73	6835	6207.5	3975.2	5124	3557.67	4365.91	11743.5	2193.32	10298.2	6366.58	11033.3	48301.2	20081.6	27543.4	52748.3	40946.2	24176.1	62634.2	13672.4	34106.8	30582.5	37338.4	51639.6	21704.6	25159.5	25825.6	28629.5	19532.8	33328.2	23760.7	25552.6	18856.1	22267.3			2	2	101	TRUE	TRUE
812	M227T365	227.113	227.101	227.114	365.021	362.912	386.107	54	53	2951	3066.51	2248.46	2526.49	2193.31	1906.88	2863.18	1866.12	1923.15	3563.09	2963.4	4327.72	3725	3607.91	4467.25	4295.71	4378.51	4150.76	3857.32	3713.69	3753.4	3822.1	3691.03	10635.2	13263.9	10864	13170.5	11465.9	14728.7	11648.4	13112.5	11306.2	12172.8			21	9	20	TRUE	FALSE
813	M227T320	227.138	227.136	227.14	319.919	317.18	327.088	67	67	1555	1200.64	1755.21	1065.61	1554.82	590.363	1617.08	1549.7	1628.06	778.3	951.172	1574.82	1542.57	1515.13	1412.97	1667.08	1311.12	1005.56	905.121	1297.6	1256.85	1511.69	1188.16	1823.38	1945.08	1580.19	2121.27	1306.89	1132.64	1156.01	948.75	844.042	1193.48			5	2	7	FALSE	TRUE
814	M227T39	227.142	227.138	227.144	39.467	28.482	52.494	85	73	7177	1842.55	3576.41	10391.1	4065.47	9646.26	11200.1	10006.2	10023.6	3650.67	3126.38	29501.4	23270.2	27690.5	21228.2	44875.1	41920.2	28599.7	19658.7	20101.7	48491.5	65657.8	23130.9	3541.66	17911.8	10131.7	12378	9412.24	8723.09	24683.3	11710.7	5501.39	8256.88		[M+NH4]+ 209.106	2	0	0	FALSE	FALSE
815	M227T133	227.142	227.141	227.143	133.168	108.48	151.691	88	51	4575	2305.24	2258.21	2205.97	2448.04	2072.35	2377.67	2325.33	2395.79	2037.14	2516.73	24529.5	14903.3	23834.2	19709.5	28882.3	14005.7	63998.8	15056.3	14956	19520.2	45618.3	12431.7	4420.63	3817.51	4082.12	3330.32	3966.48	3515.07	4115.26	3701.47	4723.59	3825.71			13	9	96	TRUE	TRUE
816	M227T163	227.163	227.163	227.164	163.416	145.617	171.574	83	76	21815	30589.9	17475.4	37814.6	13590.5	28412	31495.2	14094.7	12359	29880.1	24742.2	38185.7	53065.1	42637.6	53635.9	41639.5	43823.4	39653.1	89404.8	47342.7	52704.9	34436.2	74396.5	7357.53	23906.2	14389	14987.2	11291.6	17699.5	10111.4	16539.1	8779.96	13646.6		[M+CH3COO+2H]+ 166.136 [M+H]+ 226.159	9	29	128	TRUE	FALSE
817	M228T257	227.565	227.564	227.566	257.295	248.692	261.679	66	66	1931	1089.37	722.42	1058.44	1050.71	825.729	775.392	676.76	898.076	956.198	903.531	2852.22	3452.36	3490.2	2717.24	3602.55	3785.8	2203.37	3416.79	5989.4	5438.09	4714.51	3970.52	1348.26	1824.27	1603.41	2686.64	2634.89	1533.28	1092.25	1114.31	1205.13	1043.68			35	0	0	FALSE	FALSE
818	M228T313	228.133	228.131	228.142	312.763	309.465	323.404	57	57	3630	2506.04	1470.72	1499.48	1372.75	1803.82	1517.35	1498.75	2132.92	2112.48	1615.88	2429.77	2368.06	2149.03	2524.5	2467.2	2467.99	2778.13	2156.14	1654.64	2270.99	2232.96	2127.7	10120.6	7850.89	7724.86	7705.05	9251.28	9115.91	11311.2	9164.61	11815.6	8800.29			66	1	11	FALSE	FALSE
819	M228T39	228.145	228.14	228.148	38.656	30.023	64.854	57	52	2784	9177.88	12478.1	9061.16	9344.47	7171.1	9901.25	8501.04	11172.8	7303.25	9672.18	1552.37	4290.61	4807.45	8721.23	5829.15	5110.69	6014.85	5896.78	4028.49	11226.2	4516.98	5824.04	5534.85	6830	566.514	6420.99	4711.57	2820.89	4176.57	1549.07	5633.77	2060.03			2	0	0	FALSE	FALSE
820	M228T422	228.17	228.168	228.171	422.268	414.648	425.573	51	50	1028	1807.52	3369.54	1442.15	3196.26	1932.94	2468.45	3087.19	2770.07	1292.96	2880.34	533.524	1463.6	1305.86	1222.92	1015.16	1262.39	1598.21	980.749	1529.01	1041.98	789.358	1277.92	2819.01	3100.98	2054.96	4137.82	3563.6	3576.94	3400.35	4250.73	3116.59	4061.12			114	0	0	FALSE	FALSE
821	M229T327	228.969	228.965	228.971	326.976	325.164	341.528	48	41	596	833.082	162.773	229.902	944.74	1016.34	660.076	259.598	808.71	813.99	151.143	803.269	731.004	635.835	1101.15	739.422	1221.45	1234.21	854.401	861.968	981.224	545.16	748.599	634.888	704.454	665.087	783.163	761.23	487.941	614.828	578.108	774.166	509.102		[M+Na]+ 205.982	96	0	0	FALSE	FALSE
822	M229T252	229.064	229.063	229.066	252.112	246.348	257.698	62	62	2400	1174.47	851.969	1233.88	985.018	1113.93	1317.21	926.942	1163.21	793.322	850.935	3849.5	3398.46	2796.6	3239.95	3843.48	3641.88	2691.66	2668.37	5858.18	5684.54	3927.81	3828.61	2554.67	1791.84	1783.34	2204.9	1694.64	2330.18	1946.08	2166.29	2461.42	1988.21		[M+H-H20]+ 246.071	70	0	0	FALSE	FALSE
823	M229T198	229.106	229.104	229.107	197.682	191.616	200.79	58	57	3746	2723.72	3952.67	5807.45	3734.94	3513.23	3393.52	3742.37	3707.51	2479.11	2743.58	6758.13	7909.31	6196.77	9511.13	8665.71	8752.93	12179.4	8950.63	10614	7766.68	7118.91	6327.42	7801.61	7439.19	6898.89	7351.87	1453.84	7773.14	1653.01	8455.91	8300.05	8020.83			30	1	58	TRUE	TRUE
824	M229T96	229.122	229.121	229.123	95.556	78.858	110.069	71	64	11107	12964.9	17992.7	15923.9	16182.2	18275.1	26254.8	25367.7	20887.5	22207.4	18855.9	46283.5	16517.8	18525.1	42237.8	22581.5	24982.1	39120.1	36688.6	34769.6	37555.6	25130.9	33576.4	95892.3	64964.8	110952	65233.5	98237.3	75526.9	108014	76648.6	123500	64291.5		[M+H-H20]+ 246.127	112	22	131	TRUE	FALSE
825	M229T41	229.121	229.121	229.125	40.837	27.853	54.75	57	55	93016	137875	248790	4775.84	235755	134819	219968	246622	244855	139489	238449	38038.1	39974.1	35209.6	47030.3	13624.5	30713.1	47274.8	41998.3	44967	26971.8	45534.1	49145.9	38626.6	39209.8	39568.6	36404.7	51433.8	38649.1	36069.4	40386.7	39826	40010.7		[M+H]+ 228.117	2	24	417	TRUE	FALSE
826	M229T377	229.117	229.111	229.123	377.303	367.302	391.267	47	44	1562	2009.87	2196.09	3821.52	3620.55	1828.19	2719.02	3375.2	2612.24	2199.71	2887.4	1591.25	1315.8	1574.92	1565.29	1726.64	1940.81	1393.75	1428.09	1661.42	1643.67	1844.5	1230.96	5297.32	4476.53	4483.72	4568.03	4253.5	3911.83	3371.47	4391.61	5966.22	4449.55		[M+CH3CN+H]+ 187.084 [M+Na]+ 206.127	34	0	0	FALSE	FALSE
827	M229T313	229.118	229.115	229.123	312.865	309.406	329.69	54	53	2662	2590.5	1979.67	3264.19	1769.96	2218.34	1197.39	2042.45	1934	2412.36	1999.39	2361.19	3643.85	2092.08	2368.95	695.475	3346.7	724.17	2203.34	1636.1	1736.92	1662.91	1824.5	7802.26	17165.9	6653.34	6761.7	7078.93	7215.61	8161.37	8077.66	9291.69	2420.5		[M+2Na-H]+ 184.14	66	1	37	TRUE	FALSE
828	M229T417	229.129	229.121	229.132	417.438	413.249	428.293	53	53	1377	1549.79	2284.87	1768.62	908.985	1959.7	2719.92	2569.77	2025.23	1205.47	991.159	1791.62	1730.71	1454	2269.69	2098.78	2248.48	2329.86	2170.62	2575.94	1430.7	1674.84	1541.99	4611.62	5308.27	6349.17	4939.23	5749.63	5269.95	5100.74	4847.46	5559.56	4702.25		[M+Na]+ 206.144	22	1	17	TRUE	FALSE
829	M229T304	229.154	229.153	229.155	304.224	300.745	312.72	80	80	94316	85289.6	78014.6	79329.3	69707.7	87566.6	2985.47	81079	82173.1	85290.4	3028.49	156553	140317	150447	149721	146758	156195	170630	156170	138315	139825	136082	142548	154029	141800	141705	146253	146704	150052	164166	151280	163907	150736	[55][M]+	[M+H]+ 228.147	6	54	264	TRUE	FALSE
830	M229T320	229.154	229.153	229.155	320.314	314.041	330.269	54	53	22890	19861	50504.8	72297	35366.5	80267.2	76510.7	15990.3	49682.4	52260.8	77097	24806.3	21555.1	22660.5	25593.2	21068.3	22092	19706.8	20608.8	20678.8	20560.1	22401.1	20101.9	24351.4	16285.7	18999.4	18581.3	20970	20502.2	23059.8	20487.4	22230.8	22011.2			5	49	65	TRUE	TRUE
831	M229T367	229.154	229.153	229.155	367.397	359.862	371.507	82	82	77641	74476.2	65093.8	71852.7	68250.8	67391.5	72818.8	74676.2	77297.2	80156	73218.1	117458	114134	116932	123084	136383	128573	126002	112788	116491	138364	125337	129324	108748	104099	105505	121252	103091	122454	110498	122041	110860	122436	[56][M]+	[M+H]+ 228.146	69	68	107	TRUE	FALSE
832	M229T38	229.158	229.156	229.16	38.159	30.023	67.116	57	54	3417	5918.73	5880.61	4931.32	5974.94	1922.73	6147.25	5075.07	5377.03	5651.11	6559.98	19955.5	13449.2	7907.19	18261.2	26873.7	14393.2	20103	10618	6939.96	17276.1	17813	9787.48	10701.8	6840.67	7225.03	9336.55	5585.57	9511.09	8209.69	14201.9	9568.18	13765.2		[M+NH4]+ 211.117	2	0	0	FALSE	FALSE
833	M230T216	230.078	230.072	230.08	215.976	203.609	222.407	69	66	4419	1717.96	7256.95	13369.4	9170.77	6468.28	2771.35	2734.47	5713.47	6954.63	4861.78	2446.8	1705.94	2241.74	2675.81	3042.97	2652.98	3456.58	2991.21	4640.11	3475.24	3294.2	3500.97	1204.23	1166.7	1215.82	1123.08	1494.35	1239.05	558.447	1346.44	1371.15	1131.43		[M+Na]+ 207.089	83	5	12	FALSE	FALSE
834	M230T367	230.157	230.156	230.159	367.435	359.862	371.507	82	82	6657	9494.81	8758.15	8845.55	8554.37	7779.78	7648.66	8700.62	8317.18	7685.57	7654.04	11661.2	11259.6	11333.4	13399.7	13983.9	12942.3	12921.1	10876.6	11862.9	13516.7	11314.1	12459.5	9471.88	9697.59	9168.13	11216.8	9422.54	10313.9	9919.2	10028.7	10050.6	9993.72	[56][M+1]+		69	0	0	FALSE	FALSE
835	M230T305	230.157	230.156	230.163	304.876	301.077	321.172	97	82	8040	11756.6	11745.8	10784.3	11775.8	12839.4	11582.5	11932.5	10979.9	10230.8	10474	16501.4	15474.8	15991.1	18133.8	17856.2	16681.8	19440	17288.8	13802.9	14222.2	15158.4	14205.5	15714	15335.8	14685	14079.7	15622.5	13867.5	15470.1	15087.1	16576.4	13545.4	[55][M+1]+		6	0	0	FALSE	FALSE
836	M230T154	230.247	230.245	230.251	153.723	151.341	162.924	51	49	5947	1761.72	8350.19	9802.5	2794.27	851.967	1812.24	8179.72	8660	1922.66	9256.53	810.178	1547.9	1165.68	1151.9	327.42	2526.71	1520.57	1356.68	2547.37	1018.35	2734.03	2968.69	440.345	1582.39	1186.21	2220.31	1098.23	2165.39	596.141	2381.94	672.299	651.022			65	2	190	TRUE	FALSE
837	M231T385	231.01	231.008	231.012	384.905	375.571	390.061	60	60	593	1608.01	906.829	1086.8	1099.65	1370.16	1181.71	1210.41	1019.83	1128.63	995.483	1298.98	900.413	899.709	979.883	728.64	590.738	1061.59	1549.73	568.38	1016.95	936.125	1336.18	826.538	647.607	1481.27	698.099	716.302	750.512	1026.25	1028.64	953.158	592.377			165	0	0	FALSE	FALSE
838	M231T341	231.025	231.024	231.027	341.491	339.518	345.558	60	60	2443	684.912	614.864	580.18	521.886	513.977	376.875	370.63	621.813	401.828	430.674	2891.8	2696.41	3012.23	3548.7	3399.91	3170.57	4387.53	3237.02	3675.07	2938.72	2906.03	2767.93	220.431	107.985	223.727	156.871	199.72	278.401	336.076	227.849	206.883	141.111		[M+H]+ 230.016	25	0	0	FALSE	FALSE
839	M231T322	231.047	231.044	231.05	322.201	304.689	325.77	73	72	7387	312.24	230.477	234.218	180.424	368.86	296.169	270.85	337.437	187.622	134.549	3029.47	4669.83	5847.51	2245.57	2817.54	2406.22	3429.95	2888.71	2345.5	2637.03	3768.71	4653.9	5671.63	2062.87	2320.61	824.19	3328.57	1435.46	4971.29	2440.63	5233.64	1687.65			5	6	3	FALSE	FALSE
840	M231T427	231.097	231.094	231.099	426.781	420.761	429.932	67	64	1500	2878.91	4043.71	4940.25	2531.06	3795.32	4079.63	3622.95	2778.78	3926.81	4287.8	4025.28	4980.26	4400.28	2122.97	4323.51	5126.98	5542.12	5252.41	5221.04	4591.75	5043.22	3427.02	7558.13	8729.36	11050	9143.31	11261.5	11587.3	12007.1	9999.45	10184.3	8058.47			162	10	11	TRUE	TRUE
841	M231T409	231.097	231.094	231.099	408.69	402.57	413.653	54	54	4261	4184.23	3763.57	3641.43	4086.34	3470.73	4336.86	2893.71	3765.6	3845.04	4177.62	5147.73	3827.87	4199.9	4874.5	5745.55	7062.33	5684.63	5457.38	4164.55	4515.03	3877.16	4989.84	15987.3	17208.9	18383.1	16919.9	18704.9	17653.1	18997.8	16119.1	20423.9	15367.2		[M+K]+ 192.13	81	10	14	FALSE	FALSE
842	M231T39	231.101	231.099	231.113	38.7145	28.713	49.274	42	42	7990	12241	3616.94	12079.6	11319.8	1660.93	11063.5	11587.1	2026.41	11163.3	2334.36	2777.9	20187.5	21299.6	2406.06	2552.66	4121.91	21565	19912.3	22084.5	2761.08	20892.8	22218.5	8655	59793.7	60853.8	2165.63	10438.6	5805.83	6564.78	5995.88	3618.35	7379.54		[M+3Na-2H]+ 164.145	2	0	0	FALSE	FALSE
843	M231T411	231.133	231.13	231.135	410.971	404.449	415.581	56	55	4261	3465.83	3536.2	3945.22	3685.55	3889.76	4130.44	3057.41	3788.49	3295.21	3565.63	823.853	827.78	1367.41	5594.52	2638.3	2314.2	2343.55	2124.99	4678.34	1957.4	4642.05	1772.15	16651	17436.1	18259.2	16957.7	18644.5	16416.8	18940.9	17196.6	17932.3	14666.5		[M+Na]+ 208.149 [M+H]+ 230.131	81	9	14	FALSE	FALSE
844	M231T41	231.137	231.131	231.139	41.261	27.853	55.942	59	52	7990	16614.9	15811.7	1324.79	5626.39	14205.3	3937.88	16490.2	16367.2	15084.7	15418.8	34540.2	13763	19085.6	35483.1	26982.4	32524.2	35780.7	28013.8	29103.9	8845.58	14695.8	32076.6	54225.3	57185.9	55901.2	81216.9	57893	64726.1	63491.8	56333.7	62056.8	59395.6			7	4	110	TRUE	FALSE
845	M231T368	231.159	231.156	231.161	367.607	360.692	371.928	77	77	896	883.637	658.894	1050.07	966.498	919.523	969.218	1317.87	1127.06	1012.82	1281.09	1416.69	1501.11	1457.62	1694.59	1270.56	2002.85	1578.53	1513.44	1238.48	836.012	898.991	1681.43	687.699	948.735	1065.02	1029.62	767.88	1080.89	985.92	982.435	1262.34	1172.8	[56][M+2]+		69	0	0	FALSE	FALSE
846	M231T304	231.159	231.156	231.161	304.428	288.948	314.53	74	72	1709	1506.72	1517.47	239.689	1079.97	2003.32	2198.08	1154.75	1465.19	723.022	2050.36	2153.01	1741.48	1735.88	2599.08	2173.42	1578.95	2508.67	2436.72	1901.87	2644.26	1501.21	1949.84	1512.97	1400.83	2147.55	1482.87	1740.17	1556.24	1485.59	1359.4	1596.17	1333.43	[55][M+2]+		6	0	0	FALSE	FALSE
847	M231T202	231.17	231.169	231.171	201.652	189.908	206.888	80	80	11727	29737.7	28147.1	18285.1	30307.3	20617.3	34130.5	28134.9	35642.9	26166.1	36217.9	17766.1	17340.3	17293.6	19007	20467.5	20348	23387.8	20946	21056.3	19192	17782.6	15828.9	42056.6	54810	36860.3	52091	40111.7	50602.3	47658.1	56971.3	44636.7	58366.4	[57][M]+		59	30	43	TRUE	FALSE
848	M232T257	231.555	231.552	231.557	257.344	246.797	261.865	56	56	1179	3341.1	5001.44	7428.46	4705.74	5221.62	5233.19	3684.06	3904.45	4807.09	2802.5	1859.8	2109.48	1788.3	1609.79	1867.43	1451.75	1275.85	1850.95	3078.26	2406.93	1942.26	1342.88	3653.91	1670.72	4359.11	5448.89	4764.85	5038.12	4165.62	3139.04	3560.08	4055.76		[M+H]+ 230.552	35	0	0	FALSE	FALSE
849	M232T323	232.05	232.047	232.058	322.721	316.773	339.408	51	47	5478	27360.3	3333.9	28941.9	31946.1	21323	38808.9	28898.3	31783	22586.7	2699.71	4187.01	4150.91	3976.67	6372.45	6504.86	6350.97	6035.37	6080.98	6774.11	6129.49	4659.28	4726.18	1246.65	904.716	846.521	965.944	920.293	1089.48	492.396	835.526	561.287	983.967			45	20	11	TRUE	FALSE
850	M232T332	232.073	232.071	232.081	331.743	310.707	351.268	48	44	6140	883.22	38746.4	26066.8	32498.4	22344.2	2956.02	31172.3	1238.51	23992.9	1950.12	5753.32	5271.59	5310.86	1176.5	7686.92	6683.14	683.695	7087.53	6805.15	6106.66	5782.7	5825.98	1030.16	1435.45	1180.07	1397.33	1027.64	782.426	1033.71	1235.76	1043.86	1027.32			89	13	5	FALSE	TRUE
851	M232T364	232.093	232.093	232.094	363.757	349.062	389.662	74	62	1870	2747.39	2881.73	3037.65	3368.55	2643.81	2877.32	3234.96	2862.92	2629.85	3309.78	6923.48	7099.36	8614.2	8325.36	5088.93	9581.08	5477.49	11193.8	5600.2	7137.37	4286.4	9567.6	865.147	1032.47	823.004	843.572	787.061	724.58	662.124	932.81	780.72	787.332			21	4	1	FALSE	TRUE
852	M232T38	232.094	232.092	232.096	37.851	28.022	51.558	85	66	4101	3842.67	5852.07	4965.52	4868.42	4246.49	5712.7	5343.88	6231.93	4521.35	5305.21	12613.3	6291.46	15590.3	10828.3	12931.4	11387.6	7357.6	8623.79	11724	8824.26	11275.4	17913.4	12551.2	1063.41	13512.4	12366.2	2214.51	13550.1	1440.25	11451.1	3057.56	12381.8		[M+Na]+ 209.106	2	0	0	FALSE	FALSE
853	M232T298	232.094	232.083	232.095	298.298	291.887	319.693	48	41	2101	1954.07	2571.08	2838.44	2899.42	2255.65	2279.26	2343.9	2085.05	1503.88	1362.76	6327.14	5809.57	5824.34	5398.67	6278.57	6592.29	6995.23	6230.31	6133.95	8104.21	7427.91	8070.06	4789.09	4262.02	3821.12	725.518	4844.31	4581.99	4719.61	4199.57	5233.73	4109.93			23	39	6	FALSE	TRUE
854	M232T260	232.094	232.093	232.103	260.461	249.192	268.073	69	65	3887	2847.92	3663.65	3254.33	3707.92	3067.36	527.455	704.224	3814.92	2677.07	351.786	29641.9	12244.3	17418.4	13574.1	24769.3	27375.6	15113.1	16427.3	30989.8	20707.5	10805.4	18753.4	1734.48	1917.62	2028.96	1992.73	2004.15	1821.76	1487.92	1742.29	1862.47	1930.06			103	30	21	FALSE	FALSE
855	M232T385	232.117	232.116	232.12	384.653	375.571	399.22	83	82	1698	2018.24	3251.95	2709.32	3196.73	2560.13	3223.63	3104.97	3159.58	1967.87	2835.42	3371.58	4650.71	4037.45	4307.86	4257.69	5582.19	5403.21	3662.23	4542.66	3579.11	3524.09	3475.45	2365.61	2784.42	2325.37	2985.15	2841.91	3885.55	1977.92	3354.79	2915.92	3376.14			165	8	11	TRUE	FALSE
856	M232T443	232.14	232.138	232.142	443.115	431.653	461.143	109	82	15956	38712.3	35660.3	46564.4	36800.5	42649.5	39324.1	32336.8	50896.2	41299.9	34603.8	28670.5	24708	45415.6	31035.4	46530.5	34757.9	32051.6	30246.5	24146.9	29848.7	33268.4	41306	126175	106283	123792	106486	83767.9	101723	149105	103991	123461	104641			141	39	54	FALSE	FALSE
857	M232T202	232.173	232.169	232.176	201.699	178.838	204.132	55	54	1232	4297.3	4273.61	2356.61	3594.56	2829.09	4215.65	3542.97	4544.82	3995.67	5025.05	1844.53	1651.44	2157.83	1844.34	2752	2322.25	2805.96	477.75	1553.86	1708.4	2144.72	2105.75	4141.07	4907.21	3973.33	4662.34	5198.99	4844.7	4722.07	5695.99	5165.49	5356.6	[57][M+1]+		59	0	0	FALSE	FALSE
858	M233T329	232.901	232.899	232.902	329.2	326.907	332.659	69	69	630	0	125.239	172.252	72.3692	93.5195	78.9815	98.0882	279.665	58.2663	0	2111.21	1627.81	1741.65	3047.7	2830.13	2987.4	2774.13	2684.6	2517	2195.76	2371.23	1942.43	3107.67	3027.99	4242.19	3339.38	4025.42	2102.91	3650.57	2246.24	3482.72	2314.74		[M+Na]+ 209.913	89	0	0	FALSE	FALSE
859	M233T416	232.996	232.993	232.998	415.655	407.432	432.099	56	54	787	1542.04	861.078	1051.51	1331.05	1267.82	989.585	1983.99	1338.12	1083.73	813.033	2363.91	2445.76	1698.55	1386.33	753.975	1446.73	1109.19	693.989	3044.46	1780.39	1201.42	2322.87	1427.14	1181.96	1262.45	1533.55	1567.38	1554.41	1237.02	1225.73	965.271	1159.49		[M+K]+ 194.031	41	0	0	FALSE	FALSE
860	M233T251	233.033	233.031	233.033	251.299	242.831	262.325	93	72	6983	5293.53	4652.25	5205.48	4550.43	5658.57	4269.43	4912.32	4583.59	5747.78	3899.43	60155.2	60936.9	31295.2	34301.8	36606.6	36991.8	19518.3	24165	55562.4	53058.6	57844	34622.7	22424.5	18487.2	31565	22263.6	19100.8	30388	33547.9	21395	31673.1	29469.6			70	29	17	TRUE	FALSE
861	M233T149	233.05	233.041	233.051	149.218	142.465	175.074	49	45	13157	7011.69	14141.3	11347.6	10345	15046.2	9101.06	8939.14	7598.66	10051.5	6545.23	1051.28	2923.61	1525.04	9654.14	6914.89	4469.69	7514.72	3724.44	4873.4	15747.8	2686.5	1917.46	13676.2	17581.1	16967.4	11680.9	15555.8	12024.1	14919.1	9014.02	12783.8	6729.64		[M+Na]+ 210.062	24	26	460	TRUE	TRUE
862	M233T356	233.062	233.061	233.063	356.076	343.716	388.283	130	82	7020	30371.6	41366.7	39427.7	31973.3	30549.1	34416.6	32658.6	36566.8	40290.1	33060.1	24952.9	21396.6	20220.1	37518.8	30541.2	29836.5	33494.1	27537.9	29225.6	26324.7	22207.4	36906.6	12355.7	6668.5	12195.6	6915.28	11112.5	10037.4	9470.28	8997.18	9682.36	6833.05		[M+Na]+ 210.073	97	40	1	FALSE	FALSE
863	M233T418	233.062	233.061	233.063	418.185	397.28	431.442	54	42	2189	5207.41	5689.6	2961.75	5472.19	5569.84	6022.74	6474.75	6605.89	5281.18	3555.99	8616.69	3531.05	4211.71	6916.94	6722.58	5425.36	15608.8	4985.15	6350.12	7701.09	7738.71	17603.8	5110.7	6166.93	6336.09	5372.5	6106.95	5615.72	5862.45	5348.29	4870.57	5238.63		[M+H]+ 232.047	22	22	2	FALSE	TRUE
864	M233T266	233.062	233.061	233.064	266.284	259.452	268.694	81	81	2423	10171.6	14204.1	10298.5	21903.3	9980.33	14346.6	15133.1	15403.9	10476.1	13328.4	5687.74	5857.75	5005.32	6364.81	6653.47	7768.83	8211.68	7090.45	5582.21	6723.98	6116.69	4465.99	4206.9	4942.43	4600.01	4721.2	4627.19	4406.64	5607.85	3272.62	4656.46	4615.87			48	23	5	FALSE	TRUE
865	M233T166	233.08	233.079	233.081	166.283	150.246	172.32	85	82	53513	43319.5	39680.1	39842.3	28172.7	37921.2	27043.4	40803.8	46594.9	41097.2	42737.5	170046	167773	154418	177504	165428	180841	190894	162771	172837	181717	173601	168197	34347.5	31870.4	38270	37565.7	38786.6	34616.5	40075.7	35106.8	38950.4	34939.8	[58][M]+	[M+Na]+ 210.089 [M+H]+ 232.075	87	72	460	TRUE	FALSE
866	M233T247	233.096	233.09	233.098	247.319	238.252	267.031	57	45	15641	20099.7	10178.4	13147.6	8360.43	12612.9	13182.6	18131.9	26243.4	19417.1	15107.9	12056.3	10732.6	7882.5	12190.3	1253.63	800.204	3843.97	11685.3	8821.27	2526.13	1274.65	9251.81	2180.99	1866.81	28263.7	44792.2	26980.8	53865.1	55179.7	67892.1	2791.59	47620.6		[M+H-H20]+ 250.105	15	1	70	TRUE	TRUE
867	M233T386	233.113	233.111	233.123	386.249	377.803	396.168	49	49	2975	1651.27	2969.68	1574.93	2081.38	2264.96	2995.78	2526.73	2011.07	1835.68	600.087	3007.52	1637.31	2775.77	3820.67	4342.91	3179.82	3361.69	2807.04	2697.78	2383.44	2509.57	2090.61	9513.81	10755	10197.2	10917.7	10338	10276.6	9623.08	10474.6	9179.37	9245.84			165	2	6	TRUE	FALSE
868	M233T171	233.116	233.111	233.119	171.348	154.822	183.68	63	59	53513	4029.3	12422.3	13926.6	2463.79	4141.73	4665.29	2781.99	5058.38	14129	6235.24	4828.29	159448	4299.99	5173.31	6037.58	182251	6563.25	170205	4727.61	4130.82	4951.93	173193	8735.38	6055.3	8782.06	7740.81	6949.34	7215.97	8996.81	10103.3	7753.08	9161.91			10	0	0	FALSE	FALSE
869	M233T33	233.132	233.126	233.133	33.396	28.645	53.742	58	54	21675	10643.9	10062.2	9920.35	8416.92	9419.76	9358.73	9486.64	9574.34	10727.5	10041.1	9836.58	6229.11	6651.33	10183.4	5553.85	5348.96	5437.23	5291.7	6965.18	7267.48	3430.67	1038.67	91334.8	86344.9	92620	1116.44	90336.2	87296.7	98280.4	912.252	95354	1995.25		[M+CH3CN+Na]+ 169.112 [M+CH3CN+H]+ 191.095 [M+H]+ 232.128	3	0	0	FALSE	FALSE
870	M233T443	233.143	233.141	233.148	443.399	432.849	450.647	56	52	1505	3839.22	3426.52	3917.12	4757.88	4173.74	5346.39	5193.82	4019.3	5512.99	3405.01	3322.13	2130.85	4673.09	3681.67	4620.07	3672.22	5062.6	3596.45	3141.33	2977.37	4617.32	5229.85	10640.6	5958.28	12392.8	10279.9	11549	10316	11523.4	9553.51	14086.7	8751.37			91	0	0	FALSE	FALSE
871	M233T249	233.149	233.147	233.154	248.513	236.628	261.149	73	73	16995	22358.3	12758.3	10050.6	12482	19777.8	16575.9	16582.7	23541.2	18254.9	35164.1	13658	13975.4	14188.6	15184.2	15735.4	13542.3	20303	15214.1	9174.44	11033.3	11842.8	10913.1	65680.6	49729.7	46061.4	50768	48874.3	57926.6	67943.3	79219.9	85409.2	73619.9		[M+K]+ 194.179	15	12	116	TRUE	FALSE
872	M234T249	234.037	234.033	234.046	249.319	232.481	260.158	52	50	1418	983.393	1667.98	1297.81	1086.04	852.678	1203.15	1147.25	1341.76	1086.42	901.433	1699.74	1489.11	5325.34	780.116	3512.44	3320.16	2681.61	3483.61	7056.24	3116.52	3336.92	6280.66	2404.72	919.892	1835.16	1961.41	2424.49	794.892	2368.05	473.049	896.681	317.52			75	0	0	FALSE	FALSE
873	M234T355	234.066	234.063	234.068	355.068	349.062	381.567	77	69	1054	2897.36	4438.68	2435	2429.27	4272.07	2505.44	2587.46	3672.06	3768.31	3111.94	1593.3	1559.52	989.915	2338	2632.21	2781.32	3607.74	1835.72	2123.8	3010.23	1512.58	761.904	1246.08	5195.33	1114.22	5188.17	1008.04	4861.37	808.366	4586.65	4663.3	4666.99			90	1	7	FALSE	FALSE
874	M234T262	234.075	234.065	234.076	262.134	255.47	265.203	53	53	1540	663.825	2272.3	1956.41	538.252	1639.89	2441.23	1998.49	906.139	2032.39	989.782	2130.95	1413.51	2052.8	1647.89	1742.97	2078.26	2089.29	1805.86	1805.44	1209.87	2191.08	2203.15	1063.8	1150.89	1178.24	952.213	1057.52	1060.91	1022.53	1034.6	942.353	1029.07			74	0	0	FALSE	FALSE
875	M234T167	234.083	234.081	234.085	166.559	160.48	173.114	83	82	6882	3671.58	1935.25	6125.42	3367.75	3713.73	5511.22	5348.15	6058.22	2528.14	5270.94	21308.9	24188.2	21170.2	24680	24400.3	26191.6	28845.4	25126.6	24264.1	22654.4	23765.6	25726.1	6882.8	5688.76	5951.65	7111.92	5698.84	5304.56	8866.67	5351.17	8173.16	5899.35	[58][M+1]+		87	0	0	FALSE	FALSE
876	M234T428	234.096	234.094	234.1	428.005	410.614	431.521	48	41	2971	960.387	1209.12	2316.95	1685.92	1268.13	3244.52	325.215	2094.14	977.915	4057.99	2833.24	947.373	1582.89	2021.79	989.87	630.863	2315.08	1149.96	1781.05	622.293	1841.55	1708.47	5945.34	675.337	4188.82	3681.83	760.88	1490.21	1630.36	755.22	1717.8	1248.28		[M+CH3COO+2H]+ 173.073	78	1	9	FALSE	TRUE
877	M234T197	234.123	234.115	234.125	196.786	173.114	198.768	48	47	10653	7777.94	28869.2	7047.81	30216.6	6661.56	33352.7	35932.5	40925.6	8490.07	4809.49	4377.32	5397.58	4774.98	6126.37	6137.62	5931.06	5790.43	5319.32	4024.83	4708.03	6037.97	5692.7	1574.01	1651.41	1660.64	1507.84	1146.79	1178.63	1588.49	1156.17	1153.04	1550.8		[M+CH3CN+Na]+ 170.101 [M+CH3CN+H]+ 192.083	122	7	77	FALSE	FALSE
878	M234T55	234.134	234.132	234.136	54.6725	40.175	67.203	120	78	610379	4.13894e+06	7.73668e+06	7.53484e+06	8.76683e+06	7.04037e+06	1.6752e+06	1.68997e+06	4.7363e+06	2.22577e+06	2.91979e+06	415826	425851	133449	343572	419891	483657	285155	377583	426460	66453.4	408299	98780.2	901194	932268	848809	902377	669316	702272	991527	899647	891964	852053			8	51	329	TRUE	FALSE
879	M234T121	234.134	234.121	234.135	121.142	114.177	140.691	70	59	65447	950189	1.32903e+06	958575	556941	992804	1.4278e+06	1.47083e+06	1.83808e+06	1.0698e+06	776569	62959.1	40169.9	94063.2	148592	114014	111303	119045	78305.9	131515	188070	159742	109636	50589.2	56422.6	89179.9	39469.8	134553	77902.7	96131.8	74631.3	87921.7	71094.4			47	43	339	TRUE	TRUE
880	M234T450	234.144	234.142	234.145	449.611	434.92	461.137	104	71	2745	6047.06	12650.3	8603.61	6315.42	6845.06	5310.6	5278.61	5071.22	11430	4852.84	6285.94	6082.1	6492.83	8511.79	14994.4	9107.07	8150.98	13432	6603.27	7690.34	15183.4	13387.9	14898.5	14523.7	17962	16518.1	16320.9	14353.4	15857.6	12533.8	15975.2	12706.8		[M+H-2H2O]+ 269.161	16	14	12	TRUE	FALSE
881	M235T248	234.573	234.572	234.574	248.399	240.448	262.325	118	74	8933	609.244	242.225	1104.32	205.88	1114.23	874.557	421.408	453.643	688.007	828.631	20686.3	21680.1	17428.3	17868.6	18995.7	29686.1	16502.9	29816.2	27168.7	21182.1	25522.6	21597.7	19184.1	15818.9	23620.6	15562.2	22816.7	13929.2	20384.6	12402.2	17326	12378.7	[59][M]2+		15	0	0	FALSE	FALSE
882	M235T331	234.916	234.915	234.917	330.712	329.643	337.653	82	82	49660	25646.6	33794.2	34149.2	35201.8	31071.1	30827.5	30288.6	32792.5	24562.5	26688.7	141322	122724	116831	126333	157398	169262	172806	165297	160434	159206	145550	141047	181537	172263	225395	167428	213564	168187	201759	171483	196293	151677	[60][M]+	[M+K]+ 195.953	89	4	4	FALSE	FALSE
883	M235T357	234.997	234.995	234.998	357.019	351.222	370.743	86	82	7550	3722.07	2530.61	3916.78	2777.47	3650.79	2694.04	2466.51	2232.56	3462.76	2667.09	8052.27	7297.66	6476.72	7259.1	9607.3	10351.4	11416.1	8700.02	9703.28	8832.88	8414.87	8426.65	3326.05	1187.66	3483.58	1406.85	2238.73	1482.58	2819.69	995.865	2693.35	1201.21	[61][M]+	[M+K]+ 196.031	97	43	2	FALSE	FALSE
884	M235T148	235.048	235.046	235.05	148.261	145.484	154.435	52	50	1934	3161.44	4923.17	6571.65	4110.18	6979.6	3773.12	3092.69	1957.17	4537.93	18271.1	3192.56	8926.97	1641.68	3530.95	3065.16	9520.79	3175.62	9490.98	6154.32	2983.08	1688.96	9626	8550.31	11518.3	14476.3	14276.9	10312.4	11896	11010.5	8643.57	4691.58	7897.74			24	11	61	TRUE	TRUE
885	M235T247	235.074	235.066	235.078	247.12	222.137	262.825	78	69	3341	1869.26	1757.53	1305.53	2115.46	4621.14	1585.41	4698.47	5482.93	1126.45	1375.7	2019.92	3691.69	4121.78	3283.52	3595.99	5078.6	3454.08	4861.6	6688.63	4948.93	4131.26	5309.97	3166.27	2395.59	4613.38	3261.41	5660.48	2731.4	4854.69	1785.3	5062.04	3043.1	[59][M+1]2+		15	0	0	FALSE	FALSE
886	M235T417	235.091	235.089	235.093	416.56	408.044	435.581	100	71	3494	3587.57	1576.27	9658.71	9083.97	7315.35	5713.55	6413.23	5864.41	6587.33	8985.33	3563.45	5748.36	3284.81	5132.12	4101.67	7901.48	5928.38	5051.33	6736.11	4510.52	4793.15	4227.64	15779.4	18931.6	19914	16429.1	19263	21546.7	12847.8	11958.7	12212	15378.1			22	6	19	TRUE	FALSE
887	M235T167	235.086	235.083	235.096	167.119	150.733	177.15	43	43	2322	9567.21	3811.12	8216.44	9004	7714.53	8857.79	9424.27	9315.09	8165.6	9809.16	1574.22	7835.15	7447.69	8011.39	4839.18	8855.42	3961.46	8601.06	2696.55	3052.79	3094.51	3947.76	7475.65	7021.27	5933.54	7497.03	3446.67	7208.45	6366.61	7609.01	6384.26	6889.47			82	0	0	FALSE	FALSE
888	M235T38	235.111	235.108	235.113	37.738	29.685	57.95	71	62	57896	188218	200670	200612	3063.25	154208	192984	207073	192653	171977	1138.74	20279.8	13354	19104.9	24844.4	24110.3	21549	21390	39096.3	20327.4	10984.3	32430.9	18349	44541.5	5858.31	46930.2	38347.6	45329.5	35639.5	46544.6	4448.8	42656.2	35581		[M+H]+ 234.101	1	1	52	TRUE	FALSE
889	M235T171	235.132	235.129	235.134	171.299	152.484	176.4	42	41	2322	8835.25	8430.7	7417.46	8666.75	6960.81	8189.95	9065.19	9396.8	7634.67	9282.46	7883.46	6086.83	8305.59	9007.43	13385.6	5782.83	6085.91	10243.6	9041.88	478.335	7840.8	8503.16	9669.24	3510.21	5746.08	8584.42	6478.87	8169.81	7078.26	4921.29	3380.51	6922.9		[M+H]+ 234.118	10	0	0	FALSE	FALSE
890	M235T32	235.147	235.137	235.148	32.286	29.349	45.254	81	72	57896	1739.62	171741	166617	4864.24	7510.74	7657.78	164625	170784	169960	231982	27181.9	22933.8	24613.5	30406.1	28558.9	32049.6	30453.2	20711.4	30047.1	22350.4	18351.4	23474.7	22391	23783.3	21090.4	13621.5	24721.6	5357.9	19520.3	13033	18431.8	12617.1		[M+H]+ 234.137	3	0	0	FALSE	FALSE
891	M235T55	235.137	235.136	235.148	54.917	47.49	67.195	47	41	45417	252315	144691	359604	699562	585833	676757	144568	402698	172646	358355	41293.7	44416.6	33005.3	30446.1	38724.8	18733.7	11494	12327.9	22379.5	37687.3	19342.2	40326.7	60779.5	71220.8	88093.3	95122.2	54805.5	48342.2	101930	88713.5	37669.8	85188.6			8	0	0	FALSE	FALSE
892	M236T331	235.92	235.918	235.92	331.149	329.854	338.703	82	82	1329	557.329	1817.41	1810.73	1564.98	1510.11	572.721	1326.55	1551.98	1076.39	1113.27	3321.24	3103.67	2754.96	3682.22	4261.06	4542.7	5148.35	4308.25	4037.37	3770.45	3417.84	3589.88	3904.26	4303.25	5518.73	4014.29	4955.9	3694.18	4904.19	3761.82	4337.97	3334.33	[60][M+1]+		89	0	0	FALSE	FALSE
893	M236T357	236	235.997	236.001	356.743	351.222	360.155	51	51	655	586.6	404.247	929.286	436.321	408.875	471.034	592.745	569.543	620.73	474.033	618.59	336.295	605.097	837.868	316.686	892.682	836.602	623.347	910.76	687.739	603.568	645.332	360.925	468.971	677.11	401.089	460.224	197.694	453.579	307.226	380.694	111.576	[61][M+1]+		97	1	2	TRUE	TRUE
894	M236T327	236.008	236.006	236.018	327.375	325.829	339.597	79	75	1375	614.55	2891.67	2687.3	2998.87	2039.34	3041.66	3321.72	3307.93	2337.79	2113.61	888.86	774.078	1012.54	1101.08	883.044	1088.28	851.834	1002.53	854.792	762.787	1060.36	1005.63	505.106	538.054	515.63	450.628	408.549	511.488	526.886	502.112	454.084	401.676			96	1	2	TRUE	FALSE
895	M236T356	236.079	236.078	236.079	356.252	351.222	376.336	83	82	8833	33130.4	18703.5	37246.8	19303.1	35612.5	21695.2	21343.8	20668.4	33166.1	20219.3	10659.6	9998.46	9983.43	11228.1	12140	12483.8	13736.2	11617	11055.2	11676.2	12350.3	11644.3	42310.3	13081.3	36478.5	14549.1	36096.3	14720.7	36748.4	12643.7	37143.6	12881.7		[M+K]+ 197.116	97	34	7	FALSE	FALSE
896	M236T141	236.113	236.113	236.116	140.55	127.065	154.203	69	55	17719	23829.4	9498.53	9064.47	10446.3	10315.2	10203.4	9730.96	9917.17	24779.2	10014.1	83853.1	34477	31970.9	35922.6	94582.6	44245.9	99329.1	47885.7	54991.1	89069.7	45705.8	53892.7	24723.5	8855.36	26179.2	18218.9	25966.3	17944.4	25583.1	17647.4	24645.7	17144.6		[M+H]+ 235.103	38	7	42	TRUE	TRUE
897	M236T32	236.127	236.124	236.138	32.403	27.345	51.008	50	48	4131	2218.47	2777.41	2705.1	2345.09	2252.93	2283.81	2637.75	315.37	2738.1	2261.1	11216.5	9121.48	9920.36	12129.3	13594.8	6905.91	10382.3	11126.2	13121.4	8355.07	12559.8	11957	665	5149.46	5392.55	4112.66	4703.12	10780.9	5362.29	4363.86	4842.42	4224.9			3	0	0	FALSE	FALSE
898	M236T421	236.148	236.147	236.149	420.527	417.549	436.955	82	81	4203	19460.2	27954.2	21780.6	31690.6	23139.4	26322.4	27350.3	25604.7	19464	25544.4	8958.31	8783.98	10200.5	10749.3	8558.42	9540.97	12682.3	8018.9	10421	9742.17	7005.44	8427.59	17829.7	14532.7	20308.1	15576	21027.5	15267.3	19038.3	13510.4	18789.6	12797.4			176	25	50	FALSE	FALSE
899	M236T398	236.148	236.147	236.15	398.091	390.29	402.902	49	49	1154	2571.83	2792.78	2786.36	2629.99	2584.99	2555.47	2467.2	2761.13	2567.38	2906.35	1976.81	2311.43	1990.7	3068.86	3442.18	3060.49	2695.68	2790.07	2785.87	3249.21	3102.97	2676.57	2771.95	2440.16	3276.05	2812.05	3184.96	2893.42	2957.76	2611.97	2580.82	2543.56			67	9	5	FALSE	FALSE
900	M236T34	236.15	236.139	236.153	34.1185	28.3	75.313	72	66	3759	29828.7	52067.1	47236.4	12906.2	45384.8	48596.2	51515.4	11641.2	11768.7	13703.5	7566.63	6748.48	7744.48	19583.1	10883.3	6022.91	2905.5	10265.7	5999.32	3396.76	9060.92	5124.87	10403.4	1163.97	10789.8	1598.17	3895.92	8255.28	2930.91	9035.5	10675.4	4950.7		[M+NH4]+ 218.112	4	0	0	FALSE	FALSE
901	M237T331	236.914	236.913	236.915	330.93	329.854	337.588	82	82	7054	5280.29	6649.17	6828.33	7053.41	5565.94	6472.46	6485.2	6756.11	4845.71	5861.51	20863.7	17477.3	16573.2	19981	23750.3	25397.1	26019.7	24292.8	23848.7	23322	21173.3	20075.2	24577.5	26122.1	33127.1	23815	30483.8	24894.8	28073.2	23054.4	26749.5	21166.5	[60][M+2]+		89	1	6	TRUE	FALSE
902	M237T346	236.955	236.953	236.956	345.995	343.863	350.068	66	66	2456	1005.44	1163.68	1016.16	802.223	1223.81	1281.33	1236.51	264.188	888.598	1394.52	2241.83	1773.99	1868.69	5660.75	1888.92	1710.6	2683.94	2026.63	1762.33	2156.37	2222.19	2080.4	460.841	708.409	791.094	748.785	1482.39	742.013	1017.1	992.033	808.052	811.963		[M+CH3COO+2H]+ 175.927 [M+Na]+ 213.965	54	2	4	TRUE	TRUE
903	M237T326	237.003	237.001	237.005	326.116	324.475	335.069	66	66	2672	3340.73	5834.5	5946.6	3890.17	3249.3	124.785	3543.68	4535.71	3894.27	2656.77	2109.75	2119	1858.71	5711.76	5201.02	4611.83	4223.72	3231.08	4241.26	2900	2198.93	2214.2	4517.01	8940.26	8466.71	8702.59	7726.43	6888.81	5698.49	8332.17	4700.21	5823.34			96	3	4	TRUE	FALSE
904	M237T358	237.034	237.033	237.045	357.701	351.612	363.572	81	80	13767	2821.82	2528.57	4225.59	1958.6	3622.76	2491.6	2908.32	3219.59	3561.89	2172.97	21901.7	19891	20051.3	24348.1	28424.2	27225.9	32073.1	26694.8	27760.8	27196.1	23730.2	19648.2	1976.52	1075.22	1320.84	489.927	1605.47	1290.55	2393.32	908.872	1737.94	911.662	[62][M]+	[M+Na]+ 214.045	97	50	11	FALSE	FALSE
905	M237T38	237.127	237.119	237.128	38.483	29.593	68.773	106	77	52640	7934.61	7029.07	12623.9	2134.5	10970.6	10867.3	5372.64	6504.9	10244.4	7787.86	173023	177834	181396	168044	188538	181613	178369	170998	178491	197225	199009	201577	22634.8	36182.7	2437.26	47310.5	24005.9	36317.2	27162.1	40145.2	21104.6	36581.3		[M+Na]+ 214.136	2	16	175	TRUE	FALSE
906	M237T134	237.127	237.115	237.127	134.428	107.443	146.964	49	44	5194	1149.36	9403.97	8635.56	10702.6	8698.15	9616.12	9636.05	9153.59	7803.74	9320.97	62227	68179.6	44293.3	20188.2	43604	24654	26738.5	41541.7	67726.3	26717.1	44543.1	61150.2	8274.85	11202	9195.89	10767.5	8529.04	9514.35	9067.79	8840.8	8236.96	8895.93			13	14	198	TRUE	TRUE
907	M237T172	237.147	237.145	237.149	172.497	165.88	186.363	53	53	3076	6122.65	7287.2	5922.29	6067.16	5964.6	6568.12	4430.19	6404.27	5687.61	9063.12	10659.4	11213.8	4019.83	5620.19	5018.73	13693.4	6554.04	8835.44	4698.22	2065.23	4878.87	869.96	8607.3	15539.9	11617.5	14859.7	10738.5	15006.3	9724.31	17238.8	12367.5	16566.7		[M+Na]+ 214.151 [M+H]+ 236.133	10	1	49	TRUE	TRUE
908	M237T420	237.151	237.144	237.153	420.144	417.562	437.337	45	44	1025	2201.58	3902.77	4221.23	3062.19	404.415	3487.87	2717.09	2405.17	2797.67	3260.65	818.799	560.821	1276.91	2218.57	1301.6	1012.61	1185.4	1427.22	647.278	1111.19	982.687	1268.25	3000.05	2057.67	1999.19	2985.93	1220.25	1957.42	2518.68	2217.41	2302.62	1718.95			176	0	0	FALSE	FALSE
909	M237T32	237.163	237.154	237.165	32.0525	26.915	48.761	90	70	8202	3110.63	3391.46	5949.57	3038.78	1771.19	3791.04	1744.43	2975.54	2549.27	1968.59	27627.8	27660.2	37912	37771.1	42526.8	43689	23572	19781.6	28700.4	24149	38687.8	39170.6	3415.48	9602.19	8595.22	8564.53	10235.2	13312.5	10743.6	10385.8	3599.84	9724.76		[M+H]+ 236.157	3	1	66	TRUE	TRUE
910	M238T331	237.918	237.916	237.919	331.202	329.643	335.478	50	50	357	365.297	335.074	336.17	519.731	372.544	119.157	383.402	304.348	340.169	125.269	763.387	746.178	758.105	681.932	1019.65	926.791	1008.27	792.619	814.14	1004.07	834.908	749.186	938.303	793.572	1134.84	843.587	1329.92	767.395	952.527	785.856	897.145	615.51	[60][M+3]+		89	0	0	FALSE	FALSE
911	M238T337	238.023	238.022	238.024	337.291	334.746	340.342	63	63	1602	631.544	676.908	586.407	661.176	678.323	716.653	685.319	526.743	514.693	624.764	1503.09	1177.33	1611.4	1449.79	1839.77	1796.1	1431.69	1531.22	1889.56	1817.43	1842.45	2156.04	1649.89	484.785	729.475	511.905	543.683	373.619	1274.8	457.502	684.644	402.045			186	6	3	FALSE	FALSE
912	M238T448	238.037	238.033	238.039	448.342	444.126	460.391	55	53	2312	2312.33	2597.6	2704.85	2566.92	2082.44	2295.49	2247.49	2025.53	1607.49	2367.68	2276.36	3954.1	1772.61	1081.29	1846.55	1974.3	2928.76	5245.52	1322.36	2109.06	1542.05	1420.4	2415.45	1488.83	2698.58	1786.51	2697.53	1484.89	2329.76	1690.43	1956.41	1614.65		[M+Na]+ 215.04	16	0	0	FALSE	FALSE
913	M238T357	238.037	238.036	238.039	356.973	351.222	366.78	58	58	956	196.807	156.4	257.875	268.504	400.656	344.158	286.17	316.997	226.144	211.219	1788.85	1538.94	1913.34	1868.65	1948.43	2715.05	2623.31	2385.51	2068.18	2205.63	1991.15	1610.65	570.007	237.554	333.32	185.815	471.642	142.666	405.151	177.512	385.228	221.001	[62][M+1]+		97	0	0	FALSE	FALSE
914	M238T367	238.091	238.089	238.094	366.692	359.461	370.858	47	47	683	1655.12	1869.75	1172.36	1453.12	169.75	1678.5	808.914	806.539	1755.91	938.527	1160.41	872.675	1366.34	1164.76	1203.01	900.24	1245.49	1626.65	1145.92	1423.24	663.921	1005.52	1872.27	1841.04	1970.46	1834.89	1765.66	1976.07	1911.75	2340.75	1987.14	1892.29		[M+H]+ 237.084	69	1	38	FALSE	TRUE
915	M238T189	238.107	238.106	238.108	188.736	186.647	191.538	62	62	5298	3944.81	2439	2562.57	2956.8	3300.25	3483.63	2587.47	3610.06	3996.58	3803.86	7892.14	7581.49	7525.13	7815.86	8919.16	8345.83	9410.7	9034.96	5937.14	7625.15	7543.26	7246.63	1375.59	1344.45	964.007	928.669	802.07	1391.95	1327.85	1234.91	1490.48	1366.02			40	8	24	FALSE	FALSE
916	M238T463	238.127	238.125	238.129	463.041	451.27	467.141	48	48	427	557.425	1791.37	630.425	1800.09	569.987	1779.56	1810.02	1749.23	690.96	1414.01	1126.1	910.364	836.189	975.394	812.063	877.596	799.822	419.434	682.062	949.27	774.573	752.25	752.608	581.482	582.005	458.835	752.698	518.046	832.873	541.522	784.394	499.612			166	2	31	FALSE	TRUE
917	M238T35	238.13	238.128	238.136	35.219	29.095	49.731	75	70	10252	10380.2	6384.58	6377.61	5420.7	4801.06	5984.09	7137.06	7425.62	5281.06	6263.91	40375.1	40001.3	36592.5	33449.9	30234.6	34988.1	42369.8	34972	37556.8	38239.6	39000.9	33373.2	3158.16	11305.3	6745.02	8039.85	7237.04	20406.8	7231.33	20176.8	7598.96	8728.5		[M+Na]+ 215.144	1	0	0	FALSE	FALSE
918	M238T33	238.166	238.164	238.179	32.507	26.915	49.844	60	56	3076	2522.94	2336.32	3867.5	1843.24	3072.83	1991.7	1809.74	2232.13	3025.62	1956.82	3067.64	5020.53	7543.96	5256.43	7476.32	7723.92	7023.99	8961.9	7687.32	8939.39	5376.9	7122.57	2789.86	3180.41	2704.96	3514.5	3674.92	2810.16	1975.24	2494.07	3337.52	1681.34		[M+NH4]+ 220.125	3	0	0	FALSE	FALSE
919	M239T246	238.562	238.561	238.564	245.626	224.678	262.448	78	71	3683	1151.56	1842.68	2860.86	3148.08	2195.07	2135.48	2373.85	1419.88	1203.28	1408.65	7542.36	8874.16	8818.6	6644	6107.27	7272.22	5070.82	6795.31	11071.8	10019.7	7921.54	10546.7	18114.7	13810.3	22371.8	15694.5	20408	15011.2	18605.9	10387.1	14181.3	10245.6			15	0	0	FALSE	FALSE
920	M239T331	238.913	238.91	238.914	331.185	329.704	338.003	73	73	522	465.972	599.395	649.89	635.686	352.059	457.176	497.91	619.295	477.758	372.986	1243.9	1184.57	935.976	1253.91	1610.61	1812.97	1779.57	1564.64	1724.48	1471.5	1082.97	1153.49	1382.42	1515.94	1917.75	1478.95	1769.2	1440.44	1620.3	1212.26	1425.52	1129.37	[60][M+4]+		89	0	0	FALSE	FALSE
921	M239T356	238.968	238.967	238.981	356.402	342.648	360.155	53	52	436	633.377	658.322	865.876	508.131	819.516	407.297	519.809	707.094	804.229	908.302	913.419	777.335	1216.58	758.88	878.13	184.619	868.511	722.901	802.885	829.394	312.613	832.007	1099.21	787.988	1131.2	1090.91	1112.34	693.297	1175.97	785.669	1002.55	607.48		[M+H-2H2O]+ 273.982	97	0	0	FALSE	FALSE
922	M239T39	239.106	239.104	239.112	38.744	30.023	72.813	109	70	12303	12184.2	17597.3	768.683	17374.9	566.96	15899.6	1504.25	19769.1	11734.9	2028.9	24486.9	14162.2	15004	25504.3	10338.8	21752.8	24048.3	24008.8	27806	29317.4	50015.9	23389.8	5760.01	12911.5	9973.22	7857.89	9302.58	11426.5	5906.11	8521.29	10493.9	9067.23		[M+Na]+ 216.115	2	2	70	TRUE	TRUE
923	M239T447	239.138	239.137	239.14	446.644	442.231	454.64	62	61	1610	1485.93	1627.31	1470.47	1142.82	1268.65	1872.59	1041.54	1690.51	1201.49	1614.1	6350.02	4980.85	5148.67	3731.17	6446.46	5405.65	7626.31	5616.23	5208.73	5787.5	6732.18	5967.09	7837.79	13073.3	9112.46	10507.5	5411.05	9714.5	7742.93	11702.6	7870.04	10661.5			142	8	17	FALSE	FALSE
924	M239T150	239.142	239.141	239.143	150.417	136.343	156.588	75	61	17398	5003.01	5559.52	5145.55	5450.04	5000.15	5154.22	5279.7	5662.39	4739.12	5743.97	53558.4	53230	53107	58526.7	82105.3	60327.9	59378.9	53159.1	123195	49253.7	131793	46242.8	3447.52	4204.87	3318.92	4136.76	3610	4048	4032.68	4218.61	4408.13	4139.32		[M+Na]+ 216.145	65	30	167	TRUE	FALSE
925	M239T34_1	239.142	239.14	239.145	34.48	28.022	49.824	83	75	17087	5793.23	16813.8	3948.61	3258.8	4136.42	15268.9	14809.3	18597.4	4003.17	15522.1	82881.1	82477.4	77854.3	85791.6	58267.7	85959.2	82025.4	50844.8	78119	94879.5	55507.1	54351.7	9063.35	17571.3	9504.78	19929.6	5960.84	9917	3549.07	17941	7459.07	16163.3		[M+H]+ 238.136	4	4	120	TRUE	TRUE
926	M239T34_2	239.178	239.177	239.18	33.631	29.143	52.505	90	77	13670	4579.92	6619.23	3907.46	6101.2	3818.37	3481.95	4289.54	6996.7	5258.76	5950.94	72460.9	66240.9	70270.4	50110.5	74365.4	52795.6	63986.1	69186.6	69783.7	49458.4	37968	81671.3	4179.14	8992.82	10948	19957.8	13905.2	12922.5	5252.05	15139	10885.5	13272.1		[M+H]+ 238.164	4	1	133	TRUE	FALSE
927	M239T173	239.178	239.176	239.18	172.697	157.469	190.787	63	50	2961	1201.4	2020.73	1757.29	1806.4	1733.6	1833.07	1706.18	1900.85	1778.53	1941.84	23667.6	8112.04	7802.02	23218.7	12084.2	11159.7	7703.12	17020.7	14051.8	12466.9	10714.1	23330.5	3772.03	5358.45	3973.73	5402.59	2272.57	4760.93	2181.29	5440.67	4530.54	2927.6		[M+K]+ 200.217	10	0	0	FALSE	FALSE
928	M240T147	240.101	240.1	240.109	147.426	135.306	163.621	58	45	13670	2764.06	2239.04	2605.97	2391.59	2448.32	2341.07	2329.31	2434.63	2405.26	2050.33	22717.7	22854.8	20805.5	23825.4	28339.3	35704.1	45091.3	23477.4	30426.1	31917.6	34085.9	28892	1991.5	2229.57	2017.13	2005	2061.44	1924.29	1819.02	1983.77	1998.22	1947.06			24	30	111	TRUE	FALSE
929	M240T45	240.102	240.099	240.113	44.638	31.174	70.196	72	57	5810	4149.26	5217.15	3946.56	4489.11	3463.33	745.059	5176.25	4240.29	5202.83	4494.1	8529.17	3289.22	12244.2	7480.87	6328.62	6895.43	3008.17	10868.7	7458.93	4796.6	5849.01	6175.43	4440.3	5629.58	4742.81	4669.99	4097.86	1183.35	4760.49	5007.95	4144.89	1555.43		[M+H]+ 239.1	12	27	111	TRUE	TRUE
930	M240T35	240.146	240.144	240.158	35.296	28.215	68.436	78	68	3759	3545.42	4803.31	2084.78	3857.12	3130.5	576.776	4523.89	3395.04	4061.77	4239.97	12688.2	14638.4	9955.34	18306.5	25540.3	13366	11978.5	15524.2	23187.1	19337	21153.7	24417.4	3096.46	2954.24	5106.76	3353.39	4079.31	3400.12	1587.63	6182.88	4376.78	5441.34		[M+CH3CN+Na]+ 176.124	1	0	0	FALSE	FALSE
931	M240T154	240.146	240.144	240.158	154.211	134.388	181.827	51	47	12465	2738.56	2851.57	3015.28	1834.73	2257.94	1232.72	1264.98	2843.81	3170.44	2873.95	20305.8	3164.39	21242.6	25572.3	13130.8	20427.4	13628	22653.1	16670.9	9139.93	23274.4	21713.2	1648.63	2511.74	392.772	2299.16	2469.23	2290.59	1827.87	1986.36	2172.77	2038.51		[M+CH3CN+Na]+ 176.136	65	13	82	TRUE	TRUE
932	M240T34	240.182	240.18	240.185	33.726	27.423	53.523	65	63	4784	20456.8	17059.4	30790.2	17052.7	20562.8	16875.9	15057.8	13476.5	20894	12859.1	20975.5	13646.2	14286.3	23031.8	11163	19582.6	11901.9	13276.4	14692.1	12148.6	19294.2	16436.3	6436.8	8518.69	8609.83	1385.31	7006.81	3115.62	7663.21	1925.33	7431.48	2800.62			4	1	12	TRUE	TRUE
933	M241T285	240.986	240.985	240.987	284.639	270.333	294.241	118	81	2854	1343.09	18333.1	24302.5	31955	17589.9	19182.6	2741.76	12176.4	12911.3	13365.8	19861.4	26052.8	14372	22600.9	43503.8	30650.3	18492.9	22548.7	28056.9	40575.2	20032.5	22117.3	7870.89	21167.7	6307.58	22927.8	11947	19558	6230.74	10396.3	5843.74	8447.36			126	38	12	TRUE	TRUE
934	M241T185	240.986	240.984	240.987	184.551	175.151	192.125	78	76	6307	16732.5	54727.3	87173.7	20598.2	49100.2	22089.9	30756.5	19283.4	32079	31132.6	20201.7	15929.6	13663.6	54565.6	60958.1	68624.4	26782.5	26715.5	43161.2	43481.1	18694.7	22027	20078.8	30824.3	25457.9	32039.3	20014.8	16187	19239.4	18062.4	11394.3	12638.5		[M+Na]+ 217.998	29	37	27	TRUE	FALSE
935	M241T156	240.986	240.985	240.987	155.765	141.419	159.428	64	62	3814	13758.7	37331.6	44257.1	30438	27305.1	20814.4	22028.6	12863.4	22842.6	7249.79	13266.6	11261.3	10370.1	27615.2	21464	30566.8	11141	17596.5	25277.9	18895.8	12617.2	15742.9	14189.8	8834.7	16817.5	20586.5	17746.8	17749.6	9697.5	13862.6	12131.3	16399.9		[M+Na]+ 217.998	46	25	27	TRUE	TRUE
936	M241T233	240.986	240.985	240.987	232.821	222.951	243.61	51	45	2404	2913.68	6118.44	6612.27	4121.17	6042.89	4415.89	4295.43	2525.31	5078.77	2558.55	6467.59	6003.31	3125.12	17065.2	11180.2	7039.96	6410.1	8687.26	11776.3	8652.1	7477.01	10745	9982.95	22758.1	11646.8	12637.7	9538.6	23645.8	6159.97	7143.29	4840.46	5182.85			62	26	49	TRUE	TRUE
937	M241T358	241.005	241.004	241.008	357.787	351.612	375.586	75	57	719	838.885	1049.97	676.048	985.558	990.981	614.789	1533.79	864.628	962.358	696.029	1133.18	906.477	1379.63	1163.73	1367.73	1811.36	2012.67	1174.54	1097.44	1436.2	1188.34	1135.13	867.113	926.123	1161.09	779.101	1037.27	707.835	882.095	813.031	766.798	714.653		[M+2Na-H]+ 196.031	97	0	0	FALSE	FALSE
938	M241T261	241.083	241.081	241.086	260.757	255.131	278.34	69	68	3233	1678.18	603.36	1892.48	2125.47	1376.3	1504.2	947.725	1365.84	722.697	1388.52	2548.18	2749.75	2002.77	1805.28	1619.66	1552.51	1554.95	2037.14	2817.83	3485.32	2876.97	2963.8	646.88	2085.57	2763.51	3501.98	2188.32	3182.89	2376.03	3258.51	174.902	2525.67			103	0	0	FALSE	FALSE
939	M241T454	241.081	241.079	241.082	454.096	448.571	465.307	57	57	1536	1432.91	1679.85	2018.58	1865.87	1832.73	2257.04	1527.14	1770.79	1925.79	1970.35	3219.23	2374.73	2784.19	3385.99	3263.81	3354.13	3086.52	3072.21	3416.4	2755.87	3086.89	3111.32	6383.15	6180.25	7032.27	6100.25	6798.84	6685.58	7361.14	6270.27	7254.46	5157.61		[M+H-2H2O]+ 276.096	156	4	7	FALSE	FALSE
940	M241T418	241.081	241.074	241.083	418.039	401.625	430.271	77	58	2063	1918.31	1984.93	852.5	1981.15	2017.83	2244.71	2009.9	767.471	1012.82	717.843	2111.47	2977.71	4541.35	3627.3	5974.44	2049.28	2706.08	3353.92	2107.13	2389.47	1814.2	2075.78	6267.68	7207.46	7553.29	8203.38	12168.9	6470.71	7208.05	6402.25	7160.02	10560.3			22	5	5	TRUE	FALSE
941	M241T39_1	241.121	241.119	241.123	38.9775	29.593	52.483	90	77	9227	5206.46	3740.52	6926.76	6879.3	5728.25	3915.85	2397.85	2539.49	6582.05	3445.61	28806.2	69439.7	49284.3	115557	70893.4	70028.4	52779.4	45709.7	26580.7	23442.6	51646.3	22712	6146.87	25833.7	6451.87	21964.1	10314.5	24089.9	9825.85	23245.7	5162.66	23036.8		[M+H]+ 240.116	2	3	153	TRUE	TRUE
942	M241T157	241.121	241.118	241.122	156.505	139.313	172.91	79	66	4546	4646.45	11327.3	889.773	10636.8	1991.8	11377.1	11285.8	1251.88	2414.63	11136.9	21069	20754.3	18923	18494.1	26983.6	41240.5	84012	12537.4	13347.9	20937.4	37154.6	20478.7	5836.95	6896.22	4452.14	8640.22	4779.74	6634.63	10553.5	11168.3	10123.1	17209.6			46	3	245	TRUE	TRUE
943	M241T71	241.121	241.12	241.125	71.091	54.754	96.71	60	42	5143	4847.43	6154.24	5911.28	5576.17	5526.39	5569.37	5706.96	5240.35	5277.85	5418.2	47039.2	15642.7	22305.9	34041.7	13319.4	39267.2	33104.3	16884.5	41964.8	24108.7	64406.9	51556.1	9415.81	8381.19	9710.67	8646.99	10025.9	2302.93	8890.49	8589.42	10110.8	1805.99			124	3	105	TRUE	FALSE
944	M241T372	241.154	241.153	241.155	372.18	364.142	376.956	82	82	12379	45622.5	58050.2	40303.4	43624.4	46628.3	44491.1	67877.3	46074.7	42651.3	44811.2	36511.3	36513.2	61305.4	37105	37130	38545.6	56457.1	37506	38240.9	36063.4	34969.3	38196.3	25968.9	34924.7	29590.2	34679	36469	36902.4	28427.6	35997.9	25566.3	32830.8	[63][M]+	[M+H]+ 240.145	131	68	38	TRUE	FALSE
945	M241T321	241.154	241.153	241.155	320.757	313.739	330.554	81	74	11438	45269.9	10855.5	40209.8	14130.8	46630.4	39791.2	43379.8	13360.9	43709.4	37139.5	14748.6	11553	13876.1	13145	12687.4	12128.2	14001.6	12102	11024.3	11659.6	12285.3	11092.8	12220.7	10180.3	8585.06	10165.9	11083.4	12035.7	11135.1	10315.1	13044.1	10833.7		[M+H]+ 240.138	5	71	125	TRUE	FALSE
946	M241T346	241.154	241.153	241.155	346.216	340.224	353.014	64	57	2082	15187.2	13504.6	16888.5	16350	8634.73	13597.5	13876.8	15315.3	15333.9	16668.9	17068.4	11153.1	13134.7	18328.5	9197.11	6380.44	15547	10293.9	15656.1	13814.8	12138.3	4567.14	7339.79	8419.1	5548.96	7708.5	5287.88	9454.73	7848.27	8845.31	6981.37	9409.21			54	28	42	TRUE	TRUE
947	M241T307	241.154	241.153	241.155	307.399	304.315	312.365	73	73	24548	3043.24	16214.2	7261.3	39905	9749.93	390.692	9195.5	20262.3	20006.9	1164.11	44248.6	49977.1	47367.8	48933.1	50612.4	52289.2	49016.4	44509.2	42194.6	45876.6	46784.1	50382.3	36993.4	37610.6	37148.8	39711.3	39807.3	37785.8	40386.1	39247.9	41909.5	40408.1			104	68	61	TRUE	FALSE
948	M241T39_2	241.158	241.155	241.159	39.247	29.593	52.505	67	59	6151	9004.34	7654.73	10380.3	6725.37	8228.36	6730.94	7417.37	7457.25	9494.77	7648.58	42776.4	16448.9	29780.1	35013.7	32089.3	35582.9	21602.5	28123.1	36983.3	36139.1	22362.4	46377.6	4096.94	19054.8	9807.34	7266.91	4444.11	12646	3973.29	1088.09	327.42	17633.2		[M+H]+ 240.152	2	5	131	TRUE	TRUE
949	M241T77	241.157	241.154	241.158	77.237	58.169	101.316	74	48	4091	22395.9	44211.9	50388.6	97868.4	27649	93416.8	37382.6	80298	25975.5	33291.6	39536.3	16071.2	58481.7	39895.1	21988.9	41045.8	42845.1	38100.4	33235.4	26409	34620.5	25427.9	5349.11	7310.61	5509.83	7817.36	5030.95	7321.93	5715.98	7970.85	5874.33	6670.49			58	14	18	TRUE	FALSE
950	M241T171	241.158	241.154	241.159	171.298	159.15	188.565	78	54	7042	2820.29	2296.92	2450.14	2771.71	2054.64	2570.62	1898.88	2682.91	2388.62	2370.77	37144.3	22005.4	14034.2	38297.1	16391.9	42503.8	29383	11775.4	13626.4	27765.3	11158.2	15751.6	6500.57	3167.32	5611.6	8356.24	6656.08	8703.05	6458.04	1763.51	8521.53	8481.55		[M+H]+ 240.142	10	11	259	TRUE	FALSE
951	M241T37	241.194	241.19	241.196	37.2295	28.42	56.742	66	64	4443	8005.02	4663.99	9537.85	2205.06	2724.04	5978.95	2068.5	5949.65	4942.83	2208.92	11279.1	32026	6199.58	10570.8	31259.8	11970.3	8601.44	11638.6	14327.1	8165.18	31404.5	9060.3	7563.92	5227.64	8526.82	11410.7	5385.05	5771.04	7792.26	5392.73	3938.23	8099.73			1	0	0	FALSE	FALSE
952	M242T285	241.989	241.986	241.996	285.163	273.729	296.311	51	48	1017	1593.96	8078.93	2578.55	6244.52	1671.67	1722.48	2578.16	2619.95	8455.54	7273.17	7243.62	6868.5	1997.91	5476.66	3200.46	8365.96	1861.21	7591.43	7120.12	6638.68	892.528	7332.77	5201.73	1749.74	2603.29	2677.65	1021.11	1317.56	4595.85	4716.12	1602.04	1205.04		[M+Na]+ 219.001	126	1	5	FALSE	TRUE
953	M242T156	241.997	241.995	241.999	156.058	149.614	159.578	68	68	2906	12134	16346.2	17146	11628.3	21008.1	17409.8	14746	11070.1	17317.8	14500.6	10749.4	10056.7	10229.3	25776.2	26066.8	23549.8	11111.6	13981.1	9435.57	9739.58	9848.47	12265.1	20130.1	11322.3	9530.19	14063	17861.6	17089.7	10662.2	10279	12291.9	12918.6		[M+CH3CN+Na]+ 177.983	46	1	5	FALSE	TRUE
954	M242T183	241.997	241.99	241.999	183.121	173.679	199.906	65	62	2883	13520.3	20191.6	19515.7	8975.5	10267.2	19689.8	15872.1	13854.2	23352.3	22167	12332.8	5742.97	10376.4	28512.7	29788.1	24246.7	14602.6	7880.92	12441.3	10326.7	18237.1	7712.52	11829.4	9521.74	7970.92	13449.2	8648.43	10805.5	11890.8	13931.3	10700.9	13943.6		[M+CH3CN+Na]+ 177.981 [M+CH3CN+H]+ 199.963	29	1	5	FALSE	TRUE
955	M242T256	242.033	242.031	242.034	256.293	243.648	261.209	71	66	1830	4803.41	3176.24	3554.48	3338.04	4140.39	3255.45	3415.49	3805.47	4199	3154.55	5576.94	4520.5	7095.43	3236.28	2550.96	4670.54	3388.38	4903.25	2642.45	4677.17	4208.39	4978.96	6839.38	4198.74	3241.09	6063.13	5406.22	8108.18	7175.49	5975.82	5664.58	6362.76			35	0	0	FALSE	FALSE
956	M242T271	242.099	242.087	242.101	270.957	254.138	272.531	42	42	1734	443.907	969.752	921.524	816.665	1126.17	857.562	528.916	1316.58	1299.32	1222.1	1441.74	1093.55	1609.71	1067.77	1348.51	1165.65	1346.84	1019.89	1008.03	771.01	913.841	700.837	3979.67	1141.59	1980.12	1276.82	2954.17	1585.78	3037.62	1833.72	3857.11	2827.49		[M+Na]+ 219.11	99	1	6	FALSE	FALSE
957	M242T426	242.101	242.1	242.102	425.603	423.005	439.579	82	81	2904	21940.9	15331.9	16556.2	21344.7	18412.9	17102.3	22351.6	23814.6	18401	14329.8	11469.5	12140.3	10457.7	12317.3	14178.7	10810.5	12401.4	11779.1	16371.1	9147.71	13105.4	9562.96	14815.9	20671.6	14686.7	14844.3	19360.8	14930	15939.2	19294.4	14092.6	16354.6			17	42	11	FALSE	FALSE
958	M242T39	242.125	242.121	242.128	39.377	28.192	60.469	59	55	3076	3924.9	1070.12	1228.03	3024.67	3209.89	3218.18	3216.41	3722.04	3627.42	3427.38	16799.3	9228.26	6810.61	5571.17	13881.9	8427.69	10996.2	6217.06	12612.1	11876.9	1903.93	6371.3	4123.1	2759.52	4603.21	4881.25	4611.29	4410.65	4109.71	3630.06	5413.12	3534.65		[M+Na]+ 219.144 [M+H]+ 241.126	2	3	29	TRUE	TRUE
959	M242T372	242.157	242.156	242.16	372.223	361.732	376.748	85	82	2342	6705.7	5661.05	6473.81	6535.45	9695.53	6206.87	6051.89	9474.41	6724.51	6450.18	5577.77	7320.49	7559.67	5971.72	5932.79	8909.65	5853.47	8450.64	7577.28	8181.97	5899.05	4986.79	5707.69	5298.68	4323.64	8269.89	4305.48	7200.05	4806.43	7724.03	3434.32	5048.9	[63][M+1]+		131	3	17	FALSE	TRUE
960	M242T307	242.157	242.146	242.158	306.894	290.588	321.546	138	82	4103	3641.51	2146.31	2853.41	6596.59	4837.9	2482.08	3914.34	4643.51	2640.46	3735.66	7076.33	5756.11	6528.48	9289.18	8319.85	8256.17	8594.47	6369.65	6054.37	7506.22	7065.96	6602.49	3607	4200.42	4764.94	6190.67	16407.8	6613.44	5523.06	20839.3	18238	5660.5			6	3	17	FALSE	FALSE
961	M242T602	242.283	242.282	242.285	601.671	592.456	606.357	77	77	239	929.678	1226.27	909.689	715.792	1593.4	821.388	516.418	1185.39	708.894	1144.27	780.18	731.025	710.254	875.815	1098.11	995.72	962.199	1086.31	1214.41	1346.03	627.658	1104.74	802.432	1139.2	1403.73	986.11	1060.7	767.776	898.314	774.846	990.232	720.728			210	0	0	FALSE	FALSE
962	M243T354	242.966	242.964	242.967	353.622	349.062	380.328	103	78	3105	4830.11	10679.9	7376.87	20664.5	13674.7	15302	7588.11	15819.4	13558.1	13133.8	6929.37	7453.82	11907.2	19253.1	8273.36	24868.3	8922.71	7544.62	24223.8	7413.2	10280	10233.7	11663	33148.2	25147.2	21406	12390.9	21695.2	10549.5	19185.1	15055	16989.6			90	7	4	FALSE	FALSE
963	M243T332	242.966	242.965	242.967	332.303	326.19	340.171	54	50	1604	2373.97	4506.89	3734.38	4028	3638.64	3370.66	4022.43	3918.76	4120.84	3466.68	7715.29	7672.87	7274.84	6435.83	7502.96	8773.66	9062.82	8558.12	7761.76	8243.19	6733.16	5319.54	8856.27	7903.52	9325.25	8415.69	9328.33	8215.74	9886.55	7720.27	8966.91	7376.13			89	4	3	FALSE	FALSE
964	M243T184	242.984	242.98	242.985	183.761	177.301	212.781	46	43	1709	1602.12	5064.14	6392.3	5560.55	12665.2	5039	5032.02	3818.34	4509.29	3350.54	2074.35	3767.47	3225.4	5296.23	7168.13	7226.27	4112.4	4502.85	11560	3386.51	4451.86	3657.43	3771.41	6464.76	6274.63	3539.63	4495.35	2505.21	2719.39	1855.36	2596.08	3310.24			29	0	0	FALSE	FALSE
965	M243T286	242.983	242.981	242.986	285.731	272.238	303.003	49	46	999	3802.96	2971.83	3573.21	4891.86	5828.96	4622.77	3543.41	3997.94	4236.47	1671.23	825.575	3199.38	2328.31	8075.55	4977.37	3710.39	4167.23	1216.19	4868.1	2573.5	2453.76	3979.45	3530.39	2721	3400.23	774.244	1894.55	3661.65	1444.14	3314.13	3047.87	897.374			126	0	0	FALSE	FALSE
966	M243T367	243.046	243.044	243.05	367.424	356.49	382.199	72	67	1342	1400.41	550.421	957.829	1578.71	2674.32	1093.79	4114.9	1085.75	1707.44	3894.68	1295.6	1844.8	1726.42	1247.7	1720.09	1824.6	1658.68	1400.88	1267.19	1071.59	1819.37	1466.86	800.292	470.814	4973.51	6031.7	779.724	6272.51	1168.03	5593.19	989.181	4982.95			69	0	0	FALSE	FALSE
967	M243T42_1	243.1	243.095	243.103	41.7365	30.791	74.399	64	52	6835	21501.3	22511.3	23438.9	20852.5	22166.3	4023.32	1027.1	18555.3	18376.1	20680	35919.2	7858.81	3525.06	4327.37	5119.65	3519.18	28955.1	5574.39	29980.7	34495.2	4193.18	10358.1	7239.5	10248.9	14174.9	10316.4	12455.1	13643.5	12381.9	17124.3	14108.4	7750.92			7	10	95	TRUE	TRUE
968	M243T426	243.104	243.101	243.107	425.953	422.254	442.879	55	53	800	1165.33	2400.12	4302.62	3563.89	2517.48	2969.89	2338.83	2540.27	3270.27	1152.84	2728.64	2222.29	2231.28	876.146	1078.13	1570.82	2399.07	1727.19	2260.64	2109.85	2256.14	1931.99	1863.46	2382.4	4241.53	1027.54	2900.27	2309.4	3972.76	3443.56	2109.05	3889.23			17	0	0	FALSE	FALSE
969	M243T360	243.133	243.132	243.134	359.695	356.875	361.732	42	42	2435	6569.66	5521.34	6920.01	6087.26	6171.41	5530.18	6949.35	6363.08	5339.33	5420.66	2405.42	2505.05	1688.4	3428.93	2473	3343.02	2996.8	2008.55	2608.56	2398.77	1746.34	2134.8	8831.94	10104.8	10186.1	10492.2	8913.93	9381.35	8871.84	10021.4	8797.12	9915.48			144	7	11	TRUE	FALSE
970	M243T296	243.133	243.131	243.136	295.945	290.097	302.81	46	46	3076	1839.39	2161.12	747.781	1894.44	1511.87	2528	1867.08	2680.97	3014.16	2041.55	2790.19	2681.13	2908.87	3961.87	3257.35	3996.96	3902.27	3607.04	1733.5	2326.08	3075.1	2448.19	11689.1	9989.91	10549.5	10869.1	11105.5	12000.3	10757.5	11896.7	13564.2	12451.5			23	4	16	TRUE	FALSE
971	M243T41	243.137	243.133	243.138	41.298	29.593	58.002	87	75	6835	26990.2	2146.88	28335.9	11722.6	26513.7	911.506	4628.94	3667.44	3450.97	3106.25	52445.4	55309.9	26242.9	54423.7	80343.6	51167	75736.2	35287.5	18896.2	41685.7	82607	62007.4	9035.37	17719.4	5004.02	21651.6	12456.6	23010.8	11744.9	18995.8	8553.64	17244		[M+H]+ 242.131	7	0	0	FALSE	FALSE
972	M243T159	243.137	243.136	243.146	158.599	143.421	183.027	57	45	3605	2329.27	5089.63	2984.16	5047.21	5174.03	5811.97	4905.53	3507.14	5435.36	5581.92	6276.27	16246.5	15277.7	16592.6	22487.1	17870.2	27609	16973	508.51	26593.4	16368.6	13540	8043	8373.25	8383.28	9030.19	5955.22	9145.49	9472.37	4433.11	7487.78	8362.15			46	7	95	TRUE	TRUE
973	M243T372	243.168	243.159	243.172	372.142	370.013	390.036	47	46	1182	1024.53	911.531	1886.65	1600.85	1781.56	1365.01	996.344	1761.2	1517.84	1785.95	1297.56	1873.11	1734.75	881.872	1074	846.167	991.212	1642.33	1572.28	1078.75	1580.58	817.815	3127.43	4389.68	5422.8	4943.7	5615.11	5816.81	5129.97	5175.77	4573.07	4200.93	[63][M+2]+		131	0	0	FALSE	FALSE
974	M243T42_2	243.173	243.17	243.176	42.094	33.799	50.748	49	46	3076	4926.9	8720.76	3273.06	5197.24	4627.63	8559.61	9179.01	5284.32	6108.25	3705.39	17872.4	17470.7	9828.33	8002.1	19135.5	19850.7	20647.5	17404.5	8314.93	21257.9	23449	18471.6	8851.82	11370.3	7788.15	16531.7	8561.75	17085.6	12364.9	10275.5	10982.1	9673.04			7	0	0	FALSE	FALSE
975	M243T145	243.173	243.172	243.175	145.415	105.082	152.389	71	45	3417	3131.85	2952.26	2632.34	2955.72	2744.44	2855.24	2678.75	3969.94	2909.66	3040.55	21258.3	18111.1	11773.9	22079.4	22978.8	21292.7	33492.2	13547	18857.6	15644.9	19536.4	17118.9	4199.31	5382.22	1151.57	5392.75	3234.66	5108.86	2796.85	5838.5	4007.68	5046.68			24	4	87	TRUE	TRUE
976	M243T279	243.182	243.18	243.184	278.892	274.175	286.02	82	77	2685	10584.6	5095.96	9464.76	3388.03	9759.63	13588.9	10638.3	12905.7	11063.2	13866.4	13312.8	7936.54	15388.3	9524.79	12767.8	10353.6	12191.7	9402.48	3834.96	4444.49	9450.27	12906.9	11150.7	4753.71	6217.66	11111.8	12078.3	13726.4	15906.8	8479.52	10026.7	15644			155	4	60	TRUE	TRUE
977	M243T407	243.18	243.178	243.184	406.807	401.482	425.64	49	47	653	1031.91	869.434	1282.37	1441.51	1260.6	1549.88	1496.87	1560.26	1282.43	1473.15	2489.65	1938.48	984.087	1884.9	1599.8	2776.32	2468.74	2244.35	1800.85	1641.01	1115.79	2006.57	2266.66	1231.18	1037.61	2537.81	2129.82	1640.35	621.493	2234.5	1018.1	1341.33			50	0	0	FALSE	FALSE
978	M244T223	244.027	244.026	244.028	222.807	210.159	228.896	79	62	3389	330.713	472.659	598.45	261.994	259.321	383.21	597.685	532.564	506.851	242.607	12648.6	9851.98	11851.8	4533.07	4557.13	8225.23	4431.5	7659.6	14172.2	8777.45	7812.3	7823.3	861.783	724.116	727.869	734.913	800.005	945.574	814.125	754.308	718.869	816.713		[M+Na]+ 221.037 [M+H]+ 243.019	32	1	5	FALSE	FALSE
979	M244T253	244.078	244.072	244.08	253.155	241.788	269.279	84	71	3195	3900.27	10614.9	15055.2	13910.2	13274.1	4043.72	10778.5	4848.15	11846	4359.62	7200.28	10241.6	9004.66	11226	6790.32	7764.59	10843.4	7249.67	8097.92	12424.8	10657.7	9209.83	10392	12256.7	4758.28	11171.5	13036.6	2171.87	2366.18	11171.3	14439	11052		[M+Na]+ 221.089	70	15	10	FALSE	FALSE
980	M244T240	244.092	244.09	244.093	240.066	226.368	244.782	48	48	7096	11509.1	10249.9	7980.39	7830.59	12234.2	9091.94	8414	10947.1	10122.5	11240.6	7966.34	9581.25	10634.7	13453.2	10866.3	13901.4	14626	10076.2	5797.64	7313.53	8732.37	7408.55	33140.2	30950.9	32217.6	28720.7	36718.9	25640.7	34875	31045.7	40403.1	25974.7			88	43	16	FALSE	FALSE
981	M244T42	244.14	244.135	244.143	41.744	30.905	62.065	45	43	1709	4731.06	5544.59	5143.21	1474.14	5088	4991.65	4840.44	6506.06	4222.22	5750.69	6763.22	2591.9	1603.77	2744.71	3771.35	2736.35	3154.71	6700.95	5090.16	7594.06	7134.82	1974.23	4385.75	4100.29	3925.76	5171.14	4300.6	618.165	1024.31	2145.68	4337.63	2701.04			7	0	0	FALSE	FALSE
982	M244T468	244.165	244.164	244.166	467.709	456.62	478.582	72	70	29575	20923.6	16741	12885.7	16957.9	25980.4	16127.9	7668.67	8753	9865.13	11059.7	40327.5	61488.3	37884.4	43464.1	73587.6	44353.3	75230.5	70509.8	42186.7	45943.2	42276.9	76234.1	197712	175118	234383	192005	237631	175376	236334	162728	193340	161845			117	39	53	TRUE	FALSE
983	M245T353	244.964	244.953	244.966	353.401	332.385	377.125	73	66	657	1326.68	1895.64	1305.85	2247.34	1536.47	1323.9	1889.02	2738.69	1526.16	2338.64	1362.22	1545.57	1569	2205.98	2582.92	1753.05	1557.53	1992.8	1526.23	1228.63	1428.75	1876.06	2757.45	3495.36	3534.5	3425.45	2195.72	3022.74	2535.6	3818.3	2385.02	3032.07			90	0	0	FALSE	FALSE
984	M245T414	245.049	245.045	245.051	414.184	410.673	417.004	43	43	9431	5164.45	5189.97	5769.66	5743.62	6737.26	5263.51	5328.99	5948.82	5830.41	4334.76	2471.49	662.126	1119.43	2488.85	3101.52	1911.09	2001.85	1327.85	1321.46	816.469	8592.24	8718.93	30499.8	24307.7	40347.5	22612.4	39882.9	23990.9	34691.8	19908.8	32809.9	19341		[M+Na]+ 222.062	41	1	18	FALSE	TRUE
985	M245T262	245.059	245.05	245.063	261.924	252.726	278.622	65	62	3104	2998.87	3129.1	4196.92	3450.73	4478.48	2931.05	2880.67	3799.35	3466.96	2217.52	3243.81	1992.37	2542.03	2651.78	2073.73	2035.05	995.465	1651.15	4507.36	3122.28	3383.12	2929.22	9724.06	8420.43	12616.6	9030.45	11629.7	7939.83	10959	8468.21	9916.28	8442.97			74	10	103	TRUE	TRUE
986	M245T458	245.076	245.075	245.078	458.2	453.035	463.421	41	41	1148	1353	1524.62	1676.42	1899.16	1672.48	1735.42	1631.23	1658.88	1175.14	1781.34	1294.84	1334.66	1735.93	1431.9	2061.58	1834.81	1733.26	1637.77	705.709	1477.24	1662.48	1226.73	5885.76	3739.75	4232.43	4230.77	5023.41	5174.89	5431.76	4112.99	4471.06	3625.91			93	0	0	FALSE	FALSE
987	M245T427	245.076	245.073	245.079	427.277	403.021	442.638	58	52	822	3245.16	3192.79	1684.46	2704.2	839.455	2463.31	1245.66	2972.76	1495.46	3078.07	978.246	2683.43	3160.25	1474.68	2883.71	1111.19	1599.82	1808.36	242.305	1949.51	3733.11	1133.45	3378.85	3948.43	3917.36	2727.41	4188.15	3372.56	4940.04	5276.85	3964.43	3510.08			78	0	0	FALSE	FALSE
988	M245T326	245.091	245.089	245.093	325.949	323.889	334.484	65	65	2203	1184.09	1155.69	1096.24	1966.72	1636.89	1545.18	1006.69	932.669	1261.14	908.502	956.495	1672.82	1774.99	1036.38	1428.87	1397.79	1591.08	1155.54	1028.64	1415.82	1613.03	1894.08	857.863	1161.67	1137.54	1273.17	795.026	1378.33	852.765	1053.62	719.481	1063.28			96	6	24	FALSE	FALSE
989	M245T227	245.095	245.094	245.104	227.389	208.743	246.494	59	53	5830	5524.55	1680.61	2783.82	3754.82	1730.04	3567.53	2825.54	4362.97	3245.18	8076.24	6565.64	5603.57	8388.65	6416.91	4815.74	11399.8	8875.11	4859.91	4915.49	5641.89	4781.46	5181.34	3172.8	5766.31	2719.74	5097.01	3279.24	5193.37	3218.15	5985.95	3722.94	5387.05			51	9	25	TRUE	FALSE
990	M245T416	245.112	245.11	245.114	416.12	411.397	434.286	92	81	9431	3369.76	3787.43	3961.19	6172.83	5133.03	3720.6	3678.57	5260.98	3529.09	2093.34	8716.13	7550.59	8818.79	10412.8	8967.59	8952.84	10043.2	8569.72	9825.39	7994.4	8148.36	8253.3	30187.9	22426.4	37660.5	21448.8	37345.9	22079.1	34704.3	20288.9	33241.9	18541.8		[M+K]+ 206.144	22	7	17	FALSE	FALSE
991	M245T171	245.116	245.11	245.118	171.047	147.738	199.092	81	70	5531	4587.36	5592.51	4281.08	5556.08	5066.96	5746.88	4731.79	7365.1	2676.07	4041.88	10085.1	10516.1	9851.93	13787.8	12865.5	12975.9	11178.6	8693.91	9910.32	9722.66	10741.9	11967.8	31632.2	23083.2	22397.6	22000.3	25911.4	18511.5	25565.3	17057.5	23281.1	20494.2		[M+K]+ 206.149	10	15	100	TRUE	FALSE
992	M245T41	245.116	245.109	245.119	41.329	32.689	54.908	45	45	2734	612.352	7285.12	7638.69	5148.98	6577.09	7302.06	8150.96	7687.71	8325.2	2717.96	13159.9	14118	5608.44	4592.07	8361.53	14146.2	5432.19	2763.93	15311.4	12928.3	22702.6	13111	22773.5	26662.5	11165.1	22353.3	13662.9	27969.6	21702.5	22413.4	22613.3	20418.8		[M+H]+ 244.11	7	4	80	TRUE	TRUE
993	M245T191	245.186	245.185	245.188	191.273	181.409	195.085	71	71	6258	20104.9	24986.9	19231.4	23333	20200.1	25145.1	22192.8	23991.4	18860.7	26702.1	17371.2	16843.2	13763.7	18445	15842.1	18337.7	17156.2	17801.7	14101.4	14712.7	13700.1	16045.3	23167.2	30865.5	26240.1	29956.9	26501.1	36070.4	26638.3	26074.9	30705.8	29907.1		[M+Na]+ 222.202	39	24	29	TRUE	FALSE
994	M245T279	245.18	245.177	245.184	278.614	274.272	285.446	56	55	1325	3204.3	3580.45	2728.75	2707.61	3249.96	2781.41	1293.6	2993.65	4403.56	5085.28	2666.76	2587.3	2254.63	3109.74	3071.7	5942.25	3505.37	3202.04	2809.34	2788.98	4609.71	4519.21	5797.3	422.955	3476.58	3141.84	2935.17	1971.24	5445.4	3348.34	2276.76	4910.22			155	15	36	TRUE	TRUE
995	M246T256	245.557	245.546	245.558	255.521	240.448	272.651	47	41	1355	295.938	348.473	212.952	297.84	376.777	267.993	208.286	207.067	366.585	173.435	1576.61	3160.12	1413.73	2337.26	5416.4	3105.69	3374.12	3930.97	5270.9	4581.41	1755.15	4157.18	2115.31	1885.57	2583.63	1560.14	971.082	2039.38	1432.43	1011.44	244.09	1584.87			152	0	0	FALSE	FALSE
996	M246T339	245.938	245.935	245.939	338.625	335.913	343.008	49	49	464	662.805	433.105	673.74	472.283	508.221	615.459	661.348	297.798	974.546	466.29	325.409	301.94	330.784	321.93	340.464	280.873	226.047	303.362	277.242	280.306	333.032	214.975	16.1298	9.396	48.842	21.0169	31.7479	8.26396	66.2594	8.747	32.5555	15.903			85	0	0	FALSE	FALSE
997	M246T310	246.144	246.141	246.146	310.151	305.5	322.554	62	62	3736	9087.51	2444.31	1761.21	16195.1	2162.86	2788.99	14718.6	2133.15	3882.54	3190.4	3017.61	3118.33	3534.54	3778.74	4397.83	4122.91	4350.93	3805.99	2717.24	3582.43	3042.82	2911.69	14845.1	14801	13330	13716.5	14934.7	14633	16646.7	15661.7	18675.8	15353.7		[M+H]+ 245.137	37	7	17	TRUE	FALSE
998	M246T417	246.155	246.154	246.156	417.344	415.691	420.311	82	82	133041	79348.6	88310.7	102363	84935.6	90447.7	92358.6	82025.5	87296.6	87303.4	101824	181781	168634	186172	217148	211385	211777	212172	219103	201855	205992	180517	192427	683045	711156	707743	676173	732267	778882	714002	732229	696432	738023	[64][M]+		22	72	372	TRUE	FALSE
999	M246T439	246.155	246.154	246.156	439.169	432.426	471.269	75	59	24822	27542.8	13500.9	23525	11667.8	14454.4	24593.9	20844.2	27089.2	31513.6	23807.9	44423.2	39362	41691.6	41075.3	35164	38397.1	36805.6	39076.5	39699	40985.5	43032.6	36638.6	113106	141655	167157	147938	172704	148607	176725	127695	175289	135764			53	47	38	TRUE	FALSE
1000	M246T397	246.18	246.178	246.181	396.745	387.43	425.431	104	81	17433	18222.1	17771.1	34411.4	16494.5	20104.7	17714.1	15373.8	17453.7	20766.4	18235.7	18700.4	26787.5	16243.1	32361.5	19944.3	20759.4	36098.9	17879	15867.1	15955.9	17481.2	17361.1	88276.2	68091.7	95975.4	69369.9	59522.6	67731.8	66299	65949.7	60989.3	107744	[65][M]+		130	36	60	FALSE	FALSE
1001	M246T536	246.18	246.179	246.181	535.936	531.24	572.999	92	82	23640	86887.4	94305.4	100039	90233.2	82749.4	90656.1	90100.2	79591.2	83560.2	83507.9	23933.7	22967.4	18630.3	22920.6	24167.3	22786.2	23644.2	22338.9	23867.4	22950.5	24530.5	21842	6810.73	6849.94	8860.51	6520.19	7818.48	6675.09	7932.61	6583.19	6139.67	6443.22	[66][M]+		100	80	422	FALSE	FALSE
1002	M246T378	246.18	246.179	246.183	377.872	368.861	382.467	58	58	7744	9295.11	11136.8	10103.7	10839.5	10220.7	11153.5	10277.3	12014.6	9954.74	11188.1	8627.82	7168.44	7311.76	9553.6	9654.52	9621.66	9488.05	8171.23	8319.92	8063	8413.27	6546.79	23613.7	34263.4	23944.8	38787.6	23511.1	37564.7	23510.7	34926.9	24348.6	33896.5			34	26	178	FALSE	FALSE
1003	M247T359	247.003	247.001	247.004	359.493	355.081	372.769	54	49	698	720.392	693.829	1033.47	626.385	828.426	449.503	610.487	639.348	751.155	681.216	1684.56	1629.45	2183.87	2433.41	4080.58	4378.41	1552.24	2429.21	1637.95	2122.35	1806.54	1992.32	1347.15	1169.37	1684.26	1067.76	1331.3	862.575	1312.7	1058.83	1593.56	959.654		[M+Na]+ 224.015	144	1	2	FALSE	FALSE
1004	M247T324	247.02	247.019	247.022	324.196	322.929	327.7	72	72	14352	91.4834	616.274	164.272	351.022	178.907	0	333.284	579.985	267.856	68.3801	9136.14	9002.33	9344.55	10527.6	10411.6	11246.2	11823.2	11674.3	9723.28	10380.3	9968.74	9732.29	11389.8	4570.29	11191.2	5626.39	10855.2	5457.87	12157.1	5163.67	11563.1	4657.22	[67][M]+	[M+H]+ 246.013	45	29	3	TRUE	FALSE
1005	M247T438	247.041	247.04	247.043	437.89	421.209	450.255	55	43	2967	13670.8	51004.3	24993.8	41885.2	22701.8	25406.7	46042	26244.9	28364	25542.2	3566.27	3721.47	3450.99	2408.75	7637.12	4171.74	6314.63	10903.2	9920.47	3831.5	4139.21	4159.51	964.562	1553.21	797.737	1805.62	1837.52	1713.77	1942.77	1755.12	2006.26	1483.51			53	8	4	TRUE	FALSE
1006	M247T253	247.078	247.076	247.081	252.923	246.958	264.139	74	74	10571	3559.08	3424.39	3647.5	4625.62	3205.56	2947.54	3552.24	3278.37	3451.29	3732.33	14095.3	12471.8	15244.4	15302.4	15985.9	16902.8	17316.1	14383.6	16153.5	16413.5	15785.3	14836.6	2445.8	840.349	2181.12	2181.99	1617.17	6789.82	1650.53	1719.4	1997.08	1469.97		[M+H]+ 246.071	70	14	6	TRUE	FALSE
1007	M247T197	247.117	247.111	247.118	197.272	190.005	200.273	45	45	2795	4317.56	5113.52	6428.76	4121.61	5518.19	4741.07	4356.45	4673.09	4185.21	4599.14	3845.86	3419.1	5464.83	6470.84	6335.98	5708.79	3848.19	5601.48	5132.05	4429.66	5072.93	4941.99	6381.71	6853.98	5488.12	6550.45	6748.07	6665.45	6640.79	7794.7	7320.24	8112.95			122	1	34	TRUE	FALSE
1008	M247T327	247.132	247.13	247.133	326.948	324.859	335.069	76	76	1064	2620.74	2750.03	1102.11	5334.94	2072.66	1980.27	3017.87	4806.1	2085.35	2744.69	1531.57	1436.81	1831.67	1372.62	1421.17	1986.88	2149.86	2959.57	1594.67	1327.91	1917.3	2147.41	4707.98	5879.53	3392.44	3917.35	5424.95	6889.47	3993.47	3727.34	5310.58	5990.54		[M+H-H20]+ 264.137	96	5	23	TRUE	FALSE
1009	M247T379	247.128	247.125	247.131	378.837	356.875	383.216	92	69	3202	3002.14	4188.02	4398.39	4894.35	4068.66	4477.14	3954.89	4290.1	3399.21	4882.64	2660.51	3010.67	6342.29	3113.6	3683.13	3580.04	4894.14	3112.58	7027.4	7288.52	3597.55	3195.62	8497.39	12860.9	24396.3	11509.6	9969.93	12881	23107.2	12706.5	23269	11333.7			94	5	25	TRUE	FALSE
1010	M247T98	247.132	247.131	247.133	97.772	89.199	118.378	87	78	25145	32544.7	27200.4	30776.8	45554.7	26097.4	30366.6	34114.5	30715.9	33712.9	28359.4	35363	61469.7	57401.6	74274.8	77821.5	72312.3	76022.1	73792.6	66070.4	72892.4	67203.8	60916.2	243265	162600	212884	137560	248674	137140	212867	164188	214827	142747		[M+H]+ 246.127	112	59	340	TRUE	FALSE
1011	M247T41	247.147	247.143	247.15	40.716	28.532	69.341	61	54	19284	6827.74	34801.5	8861.32	9275.04	17394.4	9428.27	8768.07	7011.97	9647.94	8985.92	6532.57	4666.22	8083.31	23487	10778.6	7942.76	8220.76	12902.3	26394.9	13323.9	16481.7	7110.03	83043.9	98676.4	93708.1	97491.1	93123.2	95828.6	89096.3	99400.5	93864.7	98792.3			2	4	193	TRUE	TRUE
1012	M247T418	247.159	247.157	247.166	417.541	414.759	436.141	78	75	9967	8783.36	10476.2	10148.9	12210.7	10488.9	10097.6	8180.8	9561.57	8853.71	12151.1	14919.3	13853.2	13340	19184.3	17581.2	17961.3	17258.7	17575.6	17008	15831.2	13873.2	14792.3	47307.4	53068.6	54037.5	48327.5	53600.4	52313.3	49262.8	47483.1	49619.4	44258.9	[64][M+1]+		22	0	0	FALSE	FALSE
1013	M247T317	247.165	247.164	247.168	317.007	311.735	323.517	58	58	836	2239.98	2082.03	2515.1	1684.89	3020.83	3058.28	1412.76	2762.93	913.191	2911.08	2255.18	4407.22	3124.2	1666.6	1946.39	2101.54	2814.08	2767.55	3046.69	2862.79	3674.99	3703.91	2921.63	3332	2826.62	3338.97	2827.45	3504.5	1249.45	3079.09	2140.44	3414.11		[M+H]+ 246.164	84	9	116	FALSE	TRUE
1014	M247T536	247.184	247.181	247.186	535.889	530.01	546.521	83	82	2517	9033.98	11148.4	9178.44	9642.74	8957.53	9969.4	10341.1	8760.62	8261.37	9016.55	3201.25	3205.55	2746.71	3543.21	2959.79	3773.98	3704.47	3010.85	3287.12	3187.5	3660.55	2714.3	993.589	1048.09	1494.98	1272.28	1528.18	869.289	1050.69	948.37	978.633	689.871	[66][M+1]+		100	0	0	FALSE	FALSE
1015	M247T396	247.184	247.181	247.192	395.643	375.875	414.49	82	63	1582	3743.19	3675.74	2824.27	1947.76	4381.69	3792.39	1804.82	4390.21	2643.76	2341.47	2100.74	2077.1	2059.4	2462.09	2656.45	2624.12	2812.92	2322.17	511.395	2329.55	2550.99	2178.09	6059.9	7047.47	6101.51	12026	6364.22	6033.53	6762.01	5718.04	6161.15	11291.9	[65][M+1]+		130	0	0	FALSE	FALSE
1016	M247T275	247.201	247.199	247.202	274.548	273.131	275.915	80	80	9358	8784.72	5640.86	8883.48	6807.12	9226.07	6150.8	4718.93	3839.52	7576.56	3698.29	7721	9119.03	7751.68	10721.2	11427.8	11662.2	11674.7	10975.8	12152.5	10810	9810.18	7426.56	2617.65	7477.98	4603.32	8041.26	4029.96	6467.58	3412.11	6863.79	4508.23	5269.45	[68][M]+	[M+K]+ 208.236 [M+H]+ 246.193	27	20	146	TRUE	FALSE
1017	M248T324	248.023	248.021	248.025	324.16	322.439	327.7	56	56	1523	37.7647	66.7754	53.8066	168.681	138.309	41.4928	39.165	0	87.2817	144.49	939.793	816.711	1033.61	1081.18	1027.07	1030.64	793.517	1044.31	955.126	990.769	964.257	993.796	983.99	605.847	1001.01	509.507	1021.88	763.876	809.005	447.627	814.318	309.686	[67][M+1]+		45	0	0	FALSE	FALSE
1018	M248T344	248.067	248.066	248.072	343.889	334.834	353.117	69	64	1707	2513.87	2582.26	2420.88	2891.73	2457.09	583.702	2448.1	2628.43	1403.31	2721.25	2758.33	2671.76	4245.22	3424	3757.87	5661.51	6129.87	4478.62	4545.87	3482.96	3298.07	3453	4001.46	4266.23	4315.84	3664.93	4654.64	3969.02	4340.28	3908.2	3782.47	3793.98			137	2	1	FALSE	FALSE
1019	M248T430	248.076	248.072	248.086	430.104	424.688	435.581	43	42	995	2790.93	3115.66	2913.06	989.341	690.413	3672.2	3982.79	3330.62	3070.12	3591.98	855.826	1662.46	846.459	1928.39	2072.79	868	1960.38	748.363	505.184	1819.24	1145.35	1848.95	2504.89	3202.05	4164.09	2648.51	3714.09	2768.86	2922.57	2869.16	2630.83	2475.01		[M+3Na-2H]+ 181.12	78	2	1	FALSE	TRUE
1020	M248T249	248.082	248.079	248.092	249.258	234.023	255.875	66	65	3759	896.009	1355.37	1214.69	1307.7	1478.73	994.446	1189.43	1348.42	1125.26	1383.66	3639.26	2399.03	1045.07	2441.64	1497.42	2313.61	716.023	1795.37	3797.47	2175.85	2767.6	1043.05	2801.51	2115.66	3462.76	1625.69	4164.17	1607.19	3126.95	1787.14	3762.14	2122.21		[M+Na]+ 225.086	75	0	0	FALSE	FALSE
1021	M248T414	248.112	248.107	248.113	414.112	409.084	428.523	94	80	1244	12367.5	7545.89	12507.4	8013.34	10374.8	8886.67	12357.7	8354.49	9243.12	8652.2	3286.41	4825.85	4805.17	4025.17	4272.27	3966.92	3971.81	3246.26	5704.4	4194.23	4934.71	5467.74	7223.48	13112.7	9168.12	7120.62	9229.88	5220.56	6911.52	5152.92	5812.74	6983.22		[M+H-H20]+ 265.118	41	5	58	FALSE	FALSE
1022	M248T436	248.159	248.157	248.161	435.976	431.807	459.071	86	69	5581	21588.9	10924.6	11255.1	7427.2	8834.86	16005.3	18031.5	16332.7	9107.84	7403.99	8780.33	7752.87	8420.37	8856.93	8902.34	9257.67	9509.53	9452.02	9115.92	8541.9	10129.5	5836.98	28381.6	23715.6	30793.6	24665.8	30518.8	22450.1	28665.4	22884.4	28949.1	23148.3		[M+Na]+ 225.17 [M+H]+ 247.152	43	21	27	TRUE	FALSE
1023	M248T421	248.159	248.158	248.161	421.282	419.281	424.878	59	59	6990	7227.03	5786.35	7216.38	6679.79	6663.91	6381.72	6009.27	5732.51	6417.6	5526.64	8820.8	8020.83	8342.34	26899.5	11646	10409.4	11218.2	10618.2	9433.13	9874.49	9535.3	9428.38	28394.1	56556.1	31610.2	30552.6	31614.4	27949.4	33822.4	27625.8	29195.7	24853.6			114	12	32	TRUE	FALSE
1024	M248T275	248.204	248.202	248.206	274.529	273.413	276.274	46	46	1707	722.927	473.344	1343.83	820.002	1563.75	1592.19	398.896	966.478	1420.94	887.922	1697.55	1359.88	979.42	1391.33	2319.23	1541.17	2071.74	1875.08	2208.47	1367.16	1270.69	699.184	696.548	924.581	714.48	1102.73	452.906	1163.58	390.559	1054.24	749	719.395	[68][M+1]+		27	0	0	FALSE	FALSE
1025	M249T324	249.019	249.017	249.023	324.063	322.439	327.7	50	50	1448	65.9958	914.29	390.964	865.108	479.388	181.598	371.665	336.232	575.303	243.284	870.613	908.02	1508.46	833.601	881.649	698.862	1940.06	1906.09	1298.03	1692.84	1630.37	1820.03	696.975	4631.49	613.114	4700.83	5135.31	5166.84	4603.1	4657.73	5588.95	4615.86	[67][M+2]+		45	3	2	FALSE	FALSE
1026	M249T149	249.027	249.026	249.028	148.625	145.029	157.897	88	82	14617	63745.4	97119.4	130503	103527	104099	92110.4	92080.2	69856.8	79645	62298.9	30768.6	29143.8	28539.6	27666.8	26328.3	28192.6	22902.2	27284.1	45970.8	36922.9	33734	32664.6	121214	115048	196638	154069	163968	119612	140441	102670	102790	98227.1		[M+K]+ 210.062	24	13	53	TRUE	FALSE
1027	M249T347	249.036	249.035	249.037	346.73	332.178	352.925	83	82	9074	4532.36	5452.01	2836.83	5779.17	3083.84	6523.11	5194.33	5385.6	4389.54	6379.74	10416	10186.5	10398.1	10716.2	11284.5	12027.8	13099.2	11326.1	10121	10503	10542.1	10595.3	5384.68	3542.16	5717.35	3343.04	5831.88	3879.35	5870.39	3531.95	5867.22	3291.68	[69][M]+	[M+H]+ 248.029	54	26	2	FALSE	FALSE
1028	M249T174	249.075	249.073	249.081	174.132	167.56	179.317	68	66	7359	6901.25	4111.86	7702.7	6555.83	7536.95	9271.16	1474.83	10486.6	6704.04	6509.81	12173.3	13249.5	17721.9	1992.54	11750	13353.8	15315.3	13235.2	17908.9	10212.3	14556.4	11351.5	6263.08	6066.66	6926.55	5713.52	9782.22	5911.37	11522.3	4789.68	6717.05	15081.6			42	6	103	TRUE	FALSE
1029	M249T405	249.107	249.106	249.118	405.325	398.2	419.149	63	61	3207	3319.2	3540.71	4473	3958.07	4458.9	3496.79	3550.58	4043.82	3856.05	3217.55	3683.37	3220.27	3725.23	4965.72	4548.43	5115.33	4775.13	4532	4326.16	3646.02	3599.33	3919.39	13429.1	15135.7	16117.1	14412	15102.4	13448.9	15356.5	13480.5	14083.7	12232.6			50	4	12	FALSE	FALSE
1030	M249T34	249.127	249.125	249.133	34.2325	30.023	45.699	74	71	19600	11175.7	9238.42	4386.38	7750.82	8698.43	4929.41	2537.02	10102.8	2429.94	2597.11	24033.6	20894.3	22603.1	17576.2	21982.5	26277.6	26505.1	25117.4	23917.1	31440.8	24391	25240.5	54595	48059.5	56988.2	6229.45	60772.2	5420.03	62799.7	4741.51	59546.6	4694.99			4	0	0	FALSE	FALSE
1031	M249T393	249.143	249.142	249.145	393.067	383.342	397.752	84	80	1125	4284.49	2698.2	5344.64	3402.64	4171.21	3065.6	2511.01	4674.88	3665.41	2911.61	2655.17	2313.47	2225.96	3107.1	2312.06	2263.82	2189.27	2748.72	2462.4	2195.72	1887.51	2077.83	2933.52	2485.57	2876.16	2690.34	3033.98	2673.71	3086.58	2305.49	2242.89	2227.97			106	0	0	FALSE	FALSE
1032	M249T32	249.163	249.161	249.164	31.769	28.022	48.274	81	70	41999	7420.04	4332.7	6893.48	2394.11	5320.98	2630.59	2727.88	2921.16	6960.43	2987.47	103467	102464	101161	96732.2	100634	107528	93711.8	87522	102526	107318	137779	105891	7198.58	14006.5	5536.64	14315.4	6441.12	14375.5	6944.91	18364	6320.64	16696.2			3	1	91	TRUE	FALSE
1033	M250T252	249.578	249.576	249.579	251.629	245.768	254.885	65	65	2931	102.75	173.969	145.957	179.957	242.007	141.731	120.154	70.5414	169.712	135.689	2163.65	1766.03	2013.22	1142.06	1892.75	2149.83	1171.55	2053.4	3493.32	1460.18	1846.89	2431.85	1358.15	1672.75	1852.23	1223.76	1959.81	1361.89	1578.32	1046.68	968.628	510.024			70	0	0	FALSE	FALSE
1034	M250T232	250.024	250.023	250.025	231.924	219.006	234.624	45	45	977	785.564	198.649	413.898	142.566	185.738	182.141	52.6762	138.479	150.049	183.137	615.25	684.67	757.325	470.925	457.507	604.282	320.263	544.489	675.75	544	751.88	841.583	3230.82	2240.82	3970.45	2300.26	4335.87	2672.67	3634.38	2592.33	3121.98	2191.82			52	0	0	FALSE	FALSE
1035	M250T347	250.04	250.037	250.044	347.353	343.053	361.517	55	55	632	525.615	1167.53	462.642	363.863	653.533	613.264	419.588	531.992	609.533	460.903	836.095	1146.55	1183.28	1324.69	841.308	1112.02	1591.36	1009.78	772.375	971.217	987.244	1113.58	972.753	835.499	1073.55	866.098	1172.42	859.056	1049.03	969.476	1178.98	747.014	[69][M+1]+		54	0	0	FALSE	FALSE
1036	M250T342	250.094	250.092	250.095	341.626	339.507	343.57	41	41	641	694.103	932.033	761.902	903.184	678.997	560.111	638.065	490.959	745.093	652.573	1534.2	1015.69	952.99	946.903	1051.32	1260.8	1077.04	1158.94	826.637	956.978	814.716	1183.24	1190.29	2155.89	1012.58	2211.58	1468.02	2333.98	1288.17	2352.37	1134.92	2265.46			25	0	0	FALSE	FALSE
1037	M250T427	250.092	250.09	250.094	427.086	423.758	431.145	43	43	3338	1807.45	1960.98	2404.94	1028.52	2140.44	1845.68	1656.18	1812.38	1979.52	1798.23	4090.81	2773.86	5876.54	5420.51	5525.09	4192.51	4870.21	3544.72	5826.29	2650.89	3368.76	4007.45	11639.2	9669.02	12078.3	11162.8	13217.5	8878.52	11074	11446.8	8453.43	8519.65			162	7	19	FALSE	TRUE
1038	M250T241	250.1	250.094	250.102	241.465	226.958	246.761	53	53	1154	3236.03	3320.29	3086.67	3093.84	2768.81	2127.25	2927.74	2584.94	2439.51	2066.71	1372.72	952.878	1753.14	2856.6	2765.59	6329.68	6043.02	3295.13	2400.35	1781.99	1755.72	2724.76	2836.6	4490.15	4805.84	2988.26	3071.76	2661.3	4197.37	1826.74	3575.75	2273.73		[M+Na]+ 227.114	31	0	0	FALSE	FALSE
1039	M250T31	250.106	250.104	250.111	30.79	28.385	46.614	43	41	2734	2217.7	2182.77	2354.21	1622.17	1052.45	1537.82	1568.42	1733.32	1896.67	1421.18	7035.94	1957.5	2287.09	3684.33	7557.21	3994.83	2731.18	5617.45	3085.59	6215.29	2493.12	3774.77	1167.31	3372.81	1601.11	1679.07	2465.65	3311.42	2065.44	4095.49	2767.11	563.16			3	1	29	FALSE	TRUE
1040	M250T126	250.129	250.128	250.13	125.594	104.412	151.065	122	77	43315	98691.5	47875.8	342530	32224.6	525098	109517	40915.2	102846	600489	90769.1	370260	346781	250119	399612	403466	408728	162369	399942	69620.9	91785.5	161232	37512.2	201554	157141	218965	164951	166331	123506	177174	84804.8	207661	143173		[M+H]+ 249.13	13	47	117	TRUE	FALSE
1041	M250T180	250.143	250.139	250.145	179.503	173.243	196.122	68	65	20695	2695.94	1107.77	2945.6	2461.15	2158.19	1712.46	2081.21	4235.77	3328.54	1419.31	14750	14935.6	14109.5	14239.8	14395.5	14188	17737.4	13788.3	12375.8	13582.1	16560.1	14548.2	3886.48	3963.48	4027.02	5483.56	2810.35	2980.52	740.383	4289.84	3809.74	1277.88			14	10	37	TRUE	FALSE
1042	M250T385	250.164	250.162	250.165	385.06	375.101	391.833	78	78	1418	1546.12	1564.13	1641.51	1542.77	1521.8	2070.43	1828.41	1616.19	1039.85	1143.21	2334.86	1952.02	3132.96	3251.82	2752.96	4033.18	3164.77	2930.32	3407.12	2858.46	2663.48	3018.27	2167.55	2166.99	1751.21	2324.08	1714.78	1564.86	1079	1749.42	1183.11	2316.01			165	7	4	FALSE	FALSE
1043	M250T32	250.166	250.165	250.168	31.755	27.775	58.408	82	64	8202	1093.41	4616.18	5563.12	4575.78	6433.61	4228.43	3756.41	5838.55	5092.94	4587.28	26630.6	24656.8	22366.7	23257.2	23071.1	22970.9	22587.2	21483	23100.3	17396.8	26055.4	26822.8	3608.36	4914.18	3125.86	5301.37	3304.05	5838.46	4114.51	5676.14	1519.18	4297.2		[M+NH4]+ 232.128 [M+H]+ 249.159	3	0	0	FALSE	FALSE
1044	M251T357	250.971	250.97	250.972	356.509	351.222	359.977	82	82	15072	5292.5	4464.36	7432.69	6851.81	6408.43	4862.55	5331.15	5222.65	5205.3	5076.06	13970.9	11698.9	14683	12684.1	13873.6	14018.5	16271	11627.2	16006.9	12301.5	13471.8	12494.9	4335.13	2574.81	5364.66	2083.62	3451.87	2105.7	4332.25	2229.11	3605.66	1928.31	[70][M]+		97	11	3	FALSE	FALSE
1045	M251T339	251.03	251.028	251.035	338.759	325.334	351.608	90	71	10602	11488.1	6216.56	2103.82	12583.1	6535.05	14624.9	13685.9	14963	6555.2	14115.5	1132.83	7695.6	2772.28	1774.77	4537.61	4702.78	2319.5	4896.46	6586.91	2297.63	1100.09	4718.85	3671.39	2489.61	3329.22	2859.02	2901.11	2588.39	3020.98	2735.98	2929.3	2844.32			85	1	3	FALSE	FALSE
1046	M251T202	251.043	251.042	251.055	202	187.689	212.445	69	67	2309	4253.09	8658.9	11894.5	7249.6	9987.38	7470.93	7986.45	5840.87	9601.6	5607.13	2492.01	2311.59	2241.63	2516	1621.82	2437.84	1445.46	2496.96	3742.51	2791.61	1610.07	2680.86	756.113	938.206	1128.82	872.402	1000.83	789.366	891.546	613.081	711.681	667.774			59	1	13	FALSE	TRUE
1047	M251T258	251.077	251.067	251.078	258.105	239.918	262.179	93	70	2879	2884.76	2313.1	392.385	2891.64	2684.53	1403.73	2328.19	3901.97	2427.88	3425.45	4259.21	3733.64	4196.45	3649.8	3394.07	3576.52	3442.27	4276.94	5543.58	8165.74	4837.78	4132.43	7255.01	1458.95	7522.32	2548.62	1719.38	2380.03	4750.12	7061.26	1515.63	6344.16			35	0	0	FALSE	FALSE
1048	M251T204	251.09	251.081	251.093	204.407	160.975	210.778	65	52	2025	4059.87	6458.09	11133.6	5506.38	7219.41	4481.13	4372.71	2411.08	6074.24	4482.67	2426.26	1219.58	2354.55	562.74	1794.85	2531.86	5161.17	2493.5	3919.73	4057.4	4029.94	3733.35	4985.79	6616.76	7664.84	3341.93	7853.08	3167.56	5497.61	3201.86	6825.02	3551.19			188	1	50	TRUE	FALSE
1049	M251T40	251.106	251.103	251.113	39.855	30.995	58.907	70	57	6835	12414.7	13725.5	6983.26	10324.3	11092.2	10244.2	1171.9	13146.2	31114.7	12796.4	18529.3	57930.2	14461.6	53207.3	58597.7	52743.8	12398.2	4203.39	7859.36	59670.8	58733.6	12853.7	12160.5	17863.5	12259.4	11851.7	1474.14	19204.6	13816.9	7672.34	13118.9	9412.45		[M+Na]+ 228.117	2	3	136	TRUE	TRUE
1050	M251T304	251.136	251.126	251.137	304.115	300.567	319.4	80	80	3450	2761.18	5059.7	7643.8	3377.23	2776.78	574.028	4619.23	4016.69	2623.45	1192.38	2946.97	4024.8	3003.36	3759.33	4147.08	4624.4	5086.54	6438.44	10878.4	7660.9	5184.42	5064.41	5500.03	10029.2	9360.14	9287.45	7099.67	7442.75	5906.64	5222.71	4587.24	3634.5		[M+Na]+ 228.147	6	25	37	TRUE	FALSE
1051	M251T368	251.136	251.134	251.137	367.502	354.803	374.729	84	82	3737	10083	9755.49	9175.14	8490.29	10882.2	8034.2	7005.06	7435.7	10711.6	6829.63	8049.58	8809.46	8126.69	9559.74	9839.79	8945.89	9449.63	8313.35	8741.09	10341.7	9944.83	8490.12	6786.35	4048.54	6367.23	4603.76	5352.74	4235.78	6439.06	4130.05	6126.81	4204.32		[M+Na]+ 228.146	69	31	7	FALSE	FALSE
1052	M251T37	251.142	251.132	251.144	36.7415	29.245	70.582	102	75	10252	4806.19	10647.6	2488.72	1903.81	1538.61	7488.78	3096.76	10750.8	3628.66	2636.67	32258.9	53384.2	25099.4	30179.6	56476.2	49436.1	112853	52155.4	23933.2	45384.8	81028.4	61134.5	11181.7	16143	1265.23	18240.5	10413.7	9334.06	13115.2	12436.7	12290.9	17495.6		[M+CH3COO+2H]+ 190.104	1	0	0	FALSE	FALSE
1053	M251T31	251.179	251.178	251.181	31.309	26.915	52.826	93	66	28707	3501.29	3408.47	6086.73	3319.67	4073.45	2753.14	3300.73	2919.58	4173.37	2815.12	69981.3	71457.1	68833	61868.8	73318	66877.2	69027.6	64058.5	65938.3	90080.3	74826.9	67686.2	13106.1	20782.2	14178.9	15050.6	13837.2	19843.2	16787.3	15615.3	14882.6	12316.5	[71][M]+		3	7	92	TRUE	TRUE
1054	M251T176	251.179	251.176	251.18	175.532	163.261	179.065	45	45	3816	4810.02	4776.09	4314.65	5045.45	4262.8	5220.04	5211.88	5247.76	4067.11	5224.72	16556.4	13946.6	30810.7	14151	20984.6	16575.5	21801.8	10236.4	15208.5	15553.3	17374.6	16745.1	9938.85	10210.6	10621.6	10885.4	11389.1	1467.85	11440.8	9725.39	9712.64	9749.32			42	5	92	TRUE	TRUE
1055	M251T138	251.178	251.177	251.181	138.428	116.431	158.561	76	51	5732	4491.74	4323.24	5257.02	4181.25	4638.09	4569.81	4080.29	4868.12	4503.59	4333.25	21037.2	23686.1	51223.3	41755.8	8422.12	25147.1	28884.5	20525	16875.2	25648.3	26005.5	26374.3	7916.25	8914.15	7504.08	630.064	7501.91	8667.93	7880.49	8537.25	7722.89	8349.55		[M+H]+ 250.177	38	12	92	TRUE	TRUE
1056	M251T184	251.2	251.196	251.205	183.675	176.116	196.333	43	42	2489	3828.23	3739.46	3135.59	3869.22	3475.12	3973.39	4070.18	4462.45	3813.27	3970.17	2102.95	13280.7	12672.2	3974.39	14319.2	13907.4	14479.4	1727.27	3975.4	3084.07	4727.79	4742.59	8046.66	8744.19	7793.5	9058.09	8715.27	8739.65	8868.73	7723.64	863.024	748.547			29	0	0	FALSE	FALSE
1057	M252T357	251.974	251.971	251.976	356.572	351.222	359.951	57	57	998	577.529	465.355	391.236	543.507	295.37	298.96	381.52	395.354	501.945	380.785	764.089	648.334	849.741	723.965	809.152	1108.22	907.986	841.42	1172.63	764.254	929.549	891.462	466.696	181.89	395.671	277.046	388.875	217.953	438.52	202.081	326.097	188.141	[70][M+1]+		97	0	0	FALSE	FALSE
1058	M252T324	252.085	252.084	252.088	324.186	319.639	327.7	63	63	962	1072.7	937.771	935.628	892.382	879.603	1424.36	904.775	970.001	904.397	637.046	931.717	793.962	1166.81	674.062	863.088	907.032	857.697	783.186	1223.29	1140.92	1187.19	843.125	631.183	306.601	584.304	325.067	462.793	659.028	627.004	655.711	691.013	626.774			45	0	0	FALSE	FALSE
1059	M252T142	252.108	252.107	252.112	141.858	138.402	156.297	41	41	57957	571423	307680	654726	282440	602719	264899	260068	296495	599027	276178	40854.2	25926.2	29975.4	50553.7	55112.7	48444.1	48565.9	46616	41861.4	39945.9	41412.4	36403.3	8524.79	4611.06	12261.9	4426.24	10980.4	4181.97	10059.4	4124.09	9096.38	4095.34		[M+Na]+ 229.125	38	20	392	TRUE	FALSE
1060	M252T30	252.122	252.121	252.124	30.4655	14.822	32.653	82	81	737556	28730.6	15334.9	25757.8	15241	26215.6	14633.3	13796	15924	30675.4	14213.6	1.76864e+06	1.91304e+06	1.82018e+06	1.67042e+06	1.6578e+06	1.73956e+06	1.69715e+06	1.53747e+06	1.78546e+06	1.82019e+06	1.76687e+06	1.86157e+06	25421.1	208668	25238.5	220311	20781.6	240014	28760.7	230384	25862.5	233401	[72][M]+	[M+CH3COO+2H]+ 191.095	3	55	670	TRUE	FALSE
1061	M252T180	252.122	252.121	252.124	179.779	174.019	183.189	78	78	486467	10235.1	5535.65	7834.61	4452.21	8811.57	5115.88	5125.44	5566.97	9807.19	4828.72	1.56357e+06	1.49621e+06	1.50506e+06	1.56929e+06	1.59138e+06	1.63657e+06	1.77303e+06	1.52251e+06	1.38907e+06	1.45834e+06	1.62827e+06	1.57843e+06	13292.5	30026	11647.2	28830.4	1981.22	30536	12960.7	31274.1	13206.4	28328.1	[73][M]+	[M+H]+ 251.115	14	68	1069	TRUE	FALSE
1062	M252T54	252.122	252.121	252.124	53.6255	43.34	67.315	46	41	145177	242671	268945	238275	269555	212738	266652	254824	266173	238929	261274	124799	150613	613073	456417	590107	565546	782983	576177	804720	794612	563990	262911	43810.8	57236.8	51309.1	57811	49991	56214.2	48337.8	45640.7	41909	47476.3			8	53	443	TRUE	TRUE
1063	M252T457	252.143	252.138	252.145	457.294	441.27	468.967	62	61	652	1349.24	1399.58	1864.03	1203.76	1673.21	1197.48	825.417	719.186	1281.8	1529.81	1636.97	1734.78	1085.44	1866.6	2621.44	2811.4	2373.94	1856.27	1924.94	1350.8	1750.11	2273.55	1044.97	1368.49	1316.74	930.982	1852.82	1074.63	1364.59	1762.26	1715.87	1826.07			163	8	13	FALSE	FALSE
1064	M252T372	252.142	252.137	252.145	372.296	359.862	388.813	97	74	1592	4037.83	4794.76	4885.13	4923.23	2576.83	5103.88	5097.14	5266.56	3691.55	4940.03	2230.52	2921.37	1014.32	3232.76	6648.01	2760.66	3218.57	4860.69	3093.42	2482.77	3847.93	1309.87	4378.14	7740.27	5257.35	7958.34	4271.54	8416.1	5445.25	8199.71	4591.93	8082.13		[M+H]+ 251.131	131	8	7	FALSE	TRUE
1065	M252T32	252.182	252.174	252.185	31.723	27.345	66.391	71	60	4521	3626.86	747.956	4840.33	3807.12	3302.63	3718.45	4263.21	4206.13	3881.36	4098.34	12611	9960.05	12696.7	17147.4	12868	13508.4	16857.3	9289.58	12415.2	13682.9	15563.9	20877.6	5668.7	6444.88	4435.23	2133.09	6022.7	7195.63	5928.52	2817.92	914.812	6002.61	[71][M+1]+		3	0	0	FALSE	FALSE
1066	M253T335	252.917	252.915	252.919	334.993	325.829	340.208	100	78	726	2316.77	2810.94	3567.6	1862.98	2232.89	2932.73	1587.02	3026.62	1909.32	2305.87	3361.42	3729.54	1729.81	2010.2	1696.63	2594.07	1525.05	1894.86	2533.73	3240.55	3340.62	1660.55	2562.37	2677.74	2014.92	2101.01	2285.18	1863.18	1449.33	1673.99	1177.88	2404.61			139	0	0	FALSE	FALSE
1067	M253T356_1	252.97	252.966	252.973	356.377	350.812	359.74	67	67	3542	1107.18	853.672	556.88	4356.41	950.231	887.397	678.456	634.626	723.991	3442.91	1533.39	1316.47	1392.1	1463.43	1545.09	1799.61	2829.42	911.846	1508.34	1341	1620.78	1773.86	752.466	321.18	621.152	2033.83	684.524	1892.75	738.821	2027.65	2717.16	1953.86	[70][M+2]+		97	4	2	FALSE	FALSE
1068	M253T283	252.986	252.983	252.988	282.619	272.788	295.387	47	43	1112	2950.49	3926.43	5882.77	4181.35	4583.69	3545.09	4174.9	4116.97	4927.84	3604.06	3783.89	1200.22	832.2	4875.2	3630.66	636.532	1299.11	3762.21	2771.75	1704.83	2815.74	3704.72	2298.7	2122.13	2089.06	2933.51	1943.63	1711.36	1678.09	1752.37	590.08	2574.61		[M+Na]+ 229.998	155	18	7	TRUE	TRUE
1069	M253T341	253.007	252.999	253.009	341.338	329.271	346.116	51	50	2168	2571.55	2474.09	2356.35	2578.75	2486.5	3215.74	2521.93	2704.72	2336.21	2678.64	5982.47	5225.71	6118.82	5165.36	6063.34	6370.03	6437.01	6205.36	6044.91	6142.99	6220.59	6272.41	6499.41	5581.59	6300.52	6810	5806.57	5521.75	6216.16	5967.38	6104.69	5616.75		[M+Na]+ 230.016	25	25	5	TRUE	TRUE
1070	M253T356_2	253.008	253.007	253.018	355.959	350.422	371.397	78	76	8824	5521.14	5303.1	6206.57	4365.48	4045.35	4233.73	6959.96	4536.86	3908.29	3158.75	22923.6	16487.4	19289.9	21573.7	24162	24106.4	25492.4	21361.5	25550.8	21801.7	20033.9	19550.2	3429.67	2854.96	4109.13	801.915	3550.46	2202.61	1192.43	629.899	1589.62	2418.13		[M+K]+ 214.045	97	34	5	TRUE	FALSE
1071	M253T73	253.122	253.119	253.124	72.5665	63.236	85.849	62	53	17465	16944.3	16476.2	20803.2	15904.1	15193.5	21405.9	13825.1	21708.7	19020.6	23581.7	226984	77900.5	86081.7	67867.5	121629	128264	136532	220350	47776.5	90937.2	209570	60776.5	10383.2	8970.42	11150.2	8962.32	11302.7	9525.45	10388.3	8682.4	12178.1	8153.29		[M+K]+ 214.156	58	2	143	TRUE	TRUE
1072	M253T152	253.122	253.111	253.125	152.184	140.813	166.42	71	55	6756	47647.8	25334.7	53941.6	25928	46879.2	21965.4	23940.7	17604.3	52676.2	24066	30508.7	29794.2	26439.9	45297	26304.4	23945.7	32005.4	49463.9	42994.6	30142.9	51513.3	30424.7	4515.3	5982.47	4281.69	8568.21	7522.13	7075.35	2629.61	8203.61	2736.06	1493.76		[M+H]+ 252.116	65	5	143	TRUE	FALSE
1073	M253T248	253.117	253.112	253.122	248.066	228.514	255.59	52	52	9419	6231.79	2989.14	3950.2	4552.2	2195.77	5436.43	5221.87	7009.78	5216.23	7540.42	7673.52	7071.89	6625.69	6709.6	7952.5	8893.85	9617.07	8073.43	3998.09	4579.18	6609.03	6363.28	29024.4	26150.6	26134.1	25460	24984.9	31812.1	34344.5	38577.9	39278.6	35293.9			15	5	34	FALSE	FALSE
1074	M253T180	253.126	253.119	253.127	180.014	169.971	185.985	80	80	56638	4028.46	6680.83	4039.07	8739.93	5273.52	21063	5506.41	8005.61	3688.91	6069.8	177654	161138	155911	191072	172866	187775	210001	170181	149505	153120	180722	179498	3675.49	10810.3	5373.21	10172.4	6607.79	12006.2	12168.9	10470.6	6778.65	9531.82	[73][M+1]+		14	8	149	TRUE	TRUE
1075	M253T31	253.125	253.12	253.127	30.805	26.065	45.649	92	79	138817	15232.9	5777.63	12284.5	4904.29	10758.6	4380.73	6548.26	4470.1	10090.7	7297.92	240227	217587	217425	215426	203873	205321	195340	181331	202487	220961	206168	209048	17767.6	36747.1	18956.4	35309.2	19873.1	55628.5	16720.3	38073.9	16188.8	56445.9	[72][M+1]+		3	0	0	FALSE	FALSE
1076	M253T36	253.158	253.156	253.159	35.776	29.095	52.699	90	69	9569	7858.94	6056.54	8419.8	4990.26	6764.29	5574.67	5047.38	2954.47	8311.83	5457.34	77802.7	31573.4	27277	68480.6	72475.1	30470.5	36191.5	32574.8	67142.4	72626.1	73606.7	26987.2	4951.93	17488.1	19477.9	11041.1	17072.5	14959.3	16681	17740.3	16087.3	18338.8		[M+CH3COO+2H]+ 192.12	1	1	132	TRUE	TRUE
1077	M253T149	253.158	253.157	253.16	148.647	136.718	169.733	61	52	7177	3387.19	3249.99	3217.29	3923.53	3339.06	3583.23	3706.55	3642.35	3263.56	3315.6	28704.5	28307.2	38786.8	28511.7	28999.1	19179.6	31302	12802.3	45156.4	27847.9	25069.1	18954.8	5325.53	2307.08	4636.66	6326.24	5832.39	5464.54	5406.68	6285.37	5547.21	1496.71		[M+H-2H2O]+ 288.168	24	4	158	TRUE	TRUE
1078	M253T35	253.194	253.192	253.197	35.128	31.507	49.535	59	58	9569	1065.54	6644.98	9393.7	1461.03	9015.42	7411.9	1837.96	7092.88	8767.17	7508.69	23046.4	30224.4	27785.7	34282.6	36711.5	33318.6	31148.4	26518	31583.3	33676.2	28048	30150.3	5491.08	23442.8	21639.6	23343.6	18730.1	22639.6	5323.46	22853.8	17777.6	11942.6		[M+H]+ 252.18	1	9	134	TRUE	TRUE
1079	M253T172	253.194	253.189	253.196	171.637	166.384	189.398	63	54	5537	3428.9	3714.93	3303.29	3780.92	3182.71	3530.99	3621.02	3699.25	3301.86	3675.19	23053	27834.4	50812	19879.6	16724.4	11243.9	20167.1	26330.4	15923.9	22523.5	30627.6	8879.85	7055.03	1616.04	2747.33	7452.95	6926.36	3025.23	6094.96	4063.28	2878.2	7142.77		[M+H-2H2O]+ 288.211	10	17	134	TRUE	TRUE
1080	M253T133	253.194	253.193	253.195	132.845	119.32	151.821	56	41	4390	2319.81	2601.26	2226.1	2690	2214.45	2698.52	2566.54	2218.62	2337.33	2259.57	25467.9	24808.2	16972.8	28136.8	27475.9	31869.6	31691.4	99418.1	27331.2	28935	65207.2	24773.9	2951.88	3368.9	3130.7	3488.48	2786.73	3114.38	3067.12	3379.97	2939.83	3226.32			13	21	134	TRUE	TRUE
1081	M254T258	253.546	253.542	253.547	257.674	247.267	262.825	53	53	1788	435.52	303.876	333.296	175.985	587.528	290.427	287.053	363.929	442.937	245.763	3546.34	4475.66	2433.96	1909.71	2133.95	2388.6	499.995	862.964	6877.11	3703.36	4917.53	5323.2	1484.82	992.207	700.869	900.059	2336.32	745.275	2413.68	985.58	1599.84	1688.63		[M+Na]+ 230.552	35	0	0	FALSE	FALSE
1082	M254T449	253.996	253.993	253.998	448.866	443.885	459.607	66	66	8397	1033.61	818.556	1373.72	610.356	782.397	690.511	714.661	705.333	725.509	677.709	12051.1	9266.4	10154.5	10788.6	12522.6	8790.34	8187.81	9139.08	16543.1	14847.3	10547	11805.5	1705.96	1012.53	970.833	497.988	500.42	1754.24	1310.12	1816.11	1116.59	2592.74		[M+K]+ 215.04	16	14	13	FALSE	FALSE
1083	M254T355	254.011	254.008	254.013	355.315	338.555	363.521	63	60	1128	3391.51	3625.05	4720.83	3861.15	3496.43	583.118	4447.54	3506.8	3174.86	2864.63	2128.23	1302.39	929.198	1674.41	2769.64	2327.95	3046.45	1515.82	1930.75	1643.12	1273.49	1482.96	654.671	384.154	519.663	477.366	473.961	323.218	583.15	407.237	551.834	527.717			90	1	9	TRUE	TRUE
1084	M254T342	254.032	254.031	254.034	341.994	339.403	346.048	53	53	1878	1005.78	868.402	790.114	1038.62	848.188	1084.58	938.886	1007.63	702.194	976.792	3005.46	2077.05	2336.39	2352.47	2490.06	2337.15	1772.43	2268.57	3669.9	2602.49	2658.32	2957.44	622.116	614.725	529.659	566.856	487.972	473.102	585.786	687.539	735.427	581.186			25	0	0	FALSE	FALSE
1085	M254T357	254.032	254.029	254.034	357.171	351.222	373.897	60	56	1128	3792.23	4500.97	5000.24	4342.46	2781.68	4069.21	4546.62	3555.87	4061.29	3019.27	2396.48	1981.26	2413.62	1596.31	1971.19	1903.84	2036.93	2450.13	1969.76	2314.99	2024.7	2504.99	974.085	573.68	249.714	375.126	423.786	618.149	475.141	325.88	725.729	487.666		[M+Na]+ 231.043 [M+H]+ 253.025	97	0	0	FALSE	FALSE
1086	M254T306	254.11	254.108	254.113	306.433	303.58	312.653	41	41	2495	250.403	1076.38	163.259	861.234	272.653	337.193	335.493	794.885	249.203	402.307	1012.83	1060.93	1337.16	1293.48	1470.63	1463.53	2232.82	1711.66	2213.03	2240.15	2068.85	884.099	5846.94	5627.94	5503.54	4624.4	7240.91	6372.3	5548.88	4792.24	5688.78	5097.99			6	0	0	FALSE	FALSE
1087	M254T31	254.127	254.122	254.128	31.3915	26.495	57.379	88	66	8885	2212.19	1965.88	2189.71	1982.7	2641.29	1691.53	1609.3	1602.3	3641.82	2004.56	21455.3	25229	23105.8	26384.1	31661.5	27159.8	23652.6	29273.3	28604.7	23051.7	29268.2	32479.1	2810.64	13020.3	2996.96	11863.6	3249.92	6830.04	3259.56	5547.7	2924.61	8788.95	[72][M+2]+		3	0	0	FALSE	FALSE
1088	M254T180	254.128	254.117	254.129	179.864	164.786	182.303	66	65	6326	1856.28	2260.56	1614.7	1947.04	1496.79	1923.08	948.01	3380.19	1768.27	2485.17	23037.9	17457.1	18796	22517.1	20351.7	22940.1	26931	22703.8	19147.6	18551.5	22462.1	22347.2	3953.3	3546.46	815.619	3194.04	4087	4002.94	3961.85	1449.26	3211.98	3585.88	[73][M+2]+		14	9	266	TRUE	FALSE
1089	M254T34	254.161	254.159	254.163	33.881	28.482	68.39	75	66	6151	21328.1	12227.9	29462.4	12731.7	19908.3	12469.1	11986	7701.05	23131.8	8247.87	11411.2	12781.5	19682.5	11528.8	12284.6	11414.5	10029.6	24290.7	22832.7	25560	18790.5	10178.7	8333.54	4955.93	8580.45	3678.4	8965.57	5476.1	8463.1	3577.7	9171.86	3981.2			4	0	0	FALSE	FALSE
1090	M254T35	254.197	254.193	254.2	35.0255	30.555	50.753	52	50	6151	22036.2	12343.9	30299.3	13317	21019.2	12929.3	12401.7	8349.06	24684.8	8732.66	4949.41	8270.86	19016.7	5517.29	6952.96	7381.41	3034.77	8421.4	2785.7	9547.86	3791.39	7231.64	8681.64	2272.62	8890.62	1199.03	9419.08	1994.27	8691.5	3277.71	1520.83	1434.66		[M+H-2H2O]+ 289.206	1	0	0	FALSE	FALSE
1091	M255T429	254.964	254.961	254.966	429.307	427.008	445.704	75	74	1097	936.892	1407.28	1571.63	1142.74	1522.86	1029.85	1062.6	1024.27	937.24	661.966	1515.98	1339.18	1869.77	4286.02	4543.13	3920.4	3093.98	2059.01	3017.4	1516.01	2224.21	1775.68	1072.13	1465.47	389.955	1267.98	1513.97	1163.64	1086.85	1546.18	998.163	1205.64		[M+Na]+ 231.977 [M+H]+ 253.959	78	3	17	FALSE	FALSE
1092	M255T302	254.993	254.99	254.995	301.836	292.721	305.825	75	68	1799	3301.73	2181.59	1923.14	1853.75	2840.83	2880.28	3692.75	3103.16	3035.56	2177.44	2741.83	800.627	2071.1	5434.92	4142.18	4915.11	3437.21	3741.85	1477.76	2287.82	3594.88	4793.71	2600.03	2182.95	2048.32	1716.64	2802.11	2379.84	3526.4	3694.69	3836.62	1846.1			23	0	0	FALSE	FALSE
1093	M255T356	255.006	254.997	255.008	355.563	341.184	367.555	63	57	2943	8621.47	8195.33	9568.24	7251.39	9299.79	7288.38	7445.19	7616.01	8609.81	6786.67	1567.76	8860.16	1394.55	2468.6	2439.65	1879.84	1813.41	2050.2	1357.66	1753.82	1053.61	1496.58	4135.4	2062.83	5820.44	1939.72	4975.7	1653.32	4739.97	1713.12	4341.08	983.305			110	0	0	FALSE	FALSE
1094	M255T417	255.027	255.025	255.03	416.576	409.084	424.53	46	45	500	381.185	1971.7	1848.94	1852.32	1623.22	1956.36	1954.03	450.981	1280.41	1295.7	1876.02	621.986	1591.27	572.563	1972.31	2220.67	1154.74	256.017	1276.11	1636.75	574.67	684.239	1332.09	1562.64	1265.96	1642.59	1680.21	1555.1	1310.97	1231.49	1332.15	1424.35		[M+Na]+ 232.047	22	0	0	FALSE	FALSE
1095	M255T357	255.044	255.043	255.045	356.875	350.812	361.377	81	81	3077	13061.6	11283.3	12952.4	10043.6	12550.4	8852.42	9342.79	10302.6	9860.11	9408.65	10151.4	9636.95	10299.5	10807.9	12858.4	15366.5	15226.4	11979.8	13639.2	11466.9	9779.71	8923.88	4117.14	2020.65	5937.63	1772.8	4782.9	1621.94	4962.47	1563.79	4068.31	1618.39		[M+2Na-H]+ 210.073	97	16	10	FALSE	FALSE
1096	M255T372	255.097	255.095	255.098	372.416	363.321	396.932	82	67	2178	3208.56	2714.74	2909.95	3070.82	2607.88	3538.72	2662.19	2718.85	3210.33	2255.09	15136.2	5041.08	13337.7	12657.2	10247.2	6702.01	18050.9	8113	9694.02	9758.26	5861.72	5069.72	24220.1	18473.8	13615.4	17820.6	26679.4	11857.8	10766.4	24276.6	11588.8	16411.5			131	24	22	FALSE	FALSE
1097	M255T41	255.1	255.095	255.103	41.2955	31.174	70.02	68	61	19821	15954.9	15927.6	13261	13856.7	13694.4	16251.8	17451.5	15992.1	16732.2	15067.5	8543.09	7170.69	365.578	5503.73	9058.97	100301	10017.1	5467.09	7581.19	12094.1	94031.1	5101.03	82896	67167.2	74459.7	71363.2	72037.4	83766.1	96159.2	66074.2	79555.2	65153.8		[M+H]+ 254.097	7	4	86	TRUE	FALSE
1098	M255T321	255.106	255.105	255.112	320.955	305.04	329.889	82	78	4447	7171.53	5754.74	8688.76	3915.59	6398.6	2574.55	4463.51	3389.83	6729.66	5620.39	6670.49	5398.98	6402.81	7112.1	7334.09	7571.4	7334.74	6444.37	7046.3	6017.26	6606.15	5505.94	10815	11944.5	9445.34	11092.4	12379.7	11626.6	9669.15	13456.7	10251.5	9649.31		[M+H]+ 254.099	5	17	6	TRUE	FALSE
1099	M255T426	255.106	255.103	255.108	426.418	425.148	428.79	58	58	3903	6512.02	8727.19	10777.8	9528.54	9694.49	9986.75	8445.4	9168.17	8591.73	10159.1	3133.24	2892.21	2661.39	3913.34	3656.93	3313.86	4824.92	4963.11	5104.1	4184.98	4169.36	3627.25	3131.22	4189.92	4547.81	5109.34	4874.97	3088.95	3838.71	3005.29	3890.96	2201.12			162	18	15	FALSE	TRUE
1100	M255T153	255.101	255.1	255.104	153.182	149.058	170.847	67	66	35531	11725.8	11952.2	13504.5	13937.1	16034.3	14057.6	15847.4	16835	12329.7	13504.9	10580	15467	11020.7	19184.2	12649.3	14730.9	17039	12243.6	11498.9	66307.7	11493	10812.1	44500.7	29583	29929.5	22832.7	27505.7	31950	42643.5	32858.4	45376.4	26776.3		[M+K]+ 216.145	65	7	177	TRUE	FALSE
1101	M255T40_1	255.137	255.131	255.138	40.0915	29.792	52.472	88	80	20385	5898.33	5906.97	8975.47	380.8	8010.14	5800.45	21929.7	5357.72	11405.7	1067.84	169403	176079	142769	185309	119691	196584	224386	220132	123110	167926	194966	105839	10523.3	38501	11058.1	31314	6223.29	38665.5	11498.3	30804.5	13110.5	29071.8		[M+H-2H2O]+ 290.155	2	15	198	TRUE	TRUE
1102	M255T133	255.137	255.136	255.138	132.724	115.813	149.212	69	58	8069	7058.84	5471.52	6699.84	5978.79	6383.61	6745.93	6117.05	6119.54	6954.5	6242.33	50905	65668.9	49286.3	49241.9	74537	38508.6	75821.6	60251.2	19997.4	48752	24481.2	26909.3	10362.5	15017.8	9965.51	14270.4	10475.2	14981.3	10802.9	15546	10456.1	13680.9		[M+Na]+ 232.14	13	43	230	TRUE	TRUE
1103	M255T170	255.137	255.135	255.138	169.503	149.808	187.925	75	66	35531	9539.04	9359.24	10720.2	10654.6	10985.5	10707.6	10645.8	1452.01	9824.45	10335.5	121503	93165	122647	114439	102168	121895	44942.6	41410.6	85457	112711	111691	113193	6393.64	6817.53	5925.71	8899.68	7023.26	11171	14777.7	12955	6482.36	7032.23			82	33	342	TRUE	FALSE
1104	M255T319	255.144	255.141	255.146	319.389	317.466	327.934	56	56	3409	1458.82	1715.44	1002.68	1729.32	2071.88	1310.19	1925.83	2186.72	1521.22	167.173	2401.46	2705.47	2845.73	1967.55	2179.46	2167.01	2246.7	1644.63	1958.36	1677.61	2708.84	2752.58	12667.7	10506.9	11114.4	11270.7	12382	12667.6	12492	10698.6	12272.7	11738		[M+Na]+ 232.151 [M+H-H20]+ 272.146	61	13	30	TRUE	FALSE
1105	M255T40_2	255.173	255.172	255.174	40.315	27.775	53.468	75	67	6151	9428.36	8067.81	7110.42	9213.52	2673.99	3731.3	8691.35	8562.52	9742.58	8374.72	59362.9	19359.3	59043.9	33228.3	67500.8	71892.1	73466.1	70025.6	48161.6	71012.3	42744.5	16624.1	4852.71	22606	10401.6	15953.5	10296.1	16370	16603.4	22891.5	16113.9	16223.9		[M+K]+ 216.212 [M+H]+ 254.165	2	10	171	TRUE	TRUE
1106	M255T174	255.173	255.171	255.174	174.276	161.309	185.178	65	56	3759	2744.79	2607.3	1383.1	2795.48	2295.81	1592.49	2573.75	3109.17	2426.56	1353.93	30373.4	17736.8	14604.4	30620	14926.7	25001.8	13043.8	19109	29252.9	10860.8	7977.33	11833.6	864.697	6114.45	4873.43	7780.1	6185.53	8374.38	5729.5	8361.49	6645.89	7865.63		[M+H]+ 254.17	42	14	171	TRUE	TRUE
1107	M255T199	255.173	255.173	255.175	198.589	188.835	218.991	50	45	3526	1813.86	1092.58	1053.76	1191.89	923.715	1051.37	1357.95	2028.47	1301.52	1724.84	10148.1	15892.5	14137.8	9715.43	9042.41	11454	17989.9	15424.8	14166.9	8171.78	10784.2	12693.1	3311.85	4627.38	3152.84	4378.42	3115.08	4262.9	3814.34	4304.48	3164.73	5284.77			30	2	72	TRUE	FALSE
1108	M255T148	255.173	255.173	255.175	148.002	132.685	160.908	58	46	5326	3101.75	2538.38	2685.98	350.102	2715.21	916.948	2507.99	2835.71	2794.32	2866.65	21844.2	19800.9	14352.2	36730.2	22998.8	15025.2	23882.3	18122.6	18862.9	21713.7	27091.6	13056.6	5723.93	6432.7	4758.04	7912.34	4488.96	6487.47	7091.27	6446.99	2612.2	6332.07		[M+H-2H2O]+ 290.187	24	22	143	TRUE	TRUE
1109	M255T172	255.21	255.208	255.211	171.87	160.231	179.691	59	57	3759	2422.41	2413.72	2299.8	2428.55	1557.69	1673.75	2532.09	1264.33	2286.46	2521.59	12839.8	12506.9	16375.3	11580.3	15848.7	17898.1	19352.1	11091.1	14321.8	17809.5	2206.08	16428.5	5834.14	7538.43	6241.91	3205.08	3388.98	2796.15	6850.11	7401.33	2602.41	7543.72			10	27	106	TRUE	TRUE
1110	M255T200	255.21	255.2	255.211	199.923	183.677	217.343	90	59	2687	1257.37	531.861	545.334	603.635	414.84	811.339	774.777	1183.64	636.407	979.788	11527	10821.1	11517.9	15122.7	12587	21347.3	11927.3	11662.1	9735.54	12360	11326	7712.68	2316.93	2830.14	2193.6	2914.6	2047.35	3349.28	1103.82	2833.63	2162.64	3207.32		[M+H]+ 254.195	30	18	72	TRUE	FALSE
1111	M256T405	255.622	255.62	255.623	405.261	395.09	414.987	50	49	567	80.8	12.1512	129.676	68.6443	47.1794	17.7794	24.472	80.5323	99.89	60.9819	1362.47	1220.24	1409.49	1436.95	1028.94	847.448	952.91	1238.2	1165.66	967.74	978.12	890.89	71.3898	130.245	143.881	114.487	80.7796	64.9185	38.3631	116.083	74.4616	44.7137			50	0	0	FALSE	FALSE
1112	M256T518	256.029	256.028	256.03	518.239	495.669	539.251	231	75	5468	3583.36	7073.31	5334.16	6017.84	49047.3	5649.9	12945.8	16289	5531.87	3903.91	8581.68	8494.59	6695.69	19517.3	7792.49	15176.3	16828.5	14140.5	17426.5	8073.46	16948.5	9829.65	71076.5	16978.7	12175.7	7992.87	67834	9109.89	8749.09	11859.3	20664.5	4543.48			168	72	34	TRUE	TRUE
1113	M256T555	256.029	256.028	256.03	554.945	539.657	574.534	154	72	1750	1907.52	3720.28	2776.25	3066.36	3667.67	4466.22	3491.98	3076.4	2900.38	2086.18	3884.6	3973.71	3347.75	5170.94	3022.12	3995.23	3996.13	1731.96	6732.24	5714.87	3583.4	8256.36	6599.67	2409.37	3114.33	4354.04	3387.91	4464.06	6785.58	1945.27	2180.51	2981.07			36	68	34	TRUE	TRUE
1114	M256T590	256.029	256.028	256.03	589.964	575.141	599.414	101	65	3453	1307.31	11117.8	4614.22	1551.09	2802.5	7614.06	3023.14	3090.56	2884.4	1369.65	1866.43	1668.93	465.455	5204.85	279.702	4741.21	5772.08	4614.17	5254.05	4190.16	14264.1	11418.5	2074.53	1359.52	7771.71	1922.8	5961.63	1536.68	9292.93	2190.05	5546.91	2009.81			44	13	49	TRUE	TRUE
1115	M256T484	256.029	256.028	256.031	483.993	472.643	495.218	80	67	14706	9512.02	12165.1	10858.7	15087.3	10886.1	15052.1	13571.7	14372.8	12058.7	47913.6	47337.4	35853.2	35649.2	81114.8	71147.5	82417	59095.8	64447.8	61238.2	81001.5	36588.5	19472	24210.2	13529.9	20534	9291.13	17032.2	9169.88	19559.8	13136.7	19164.3	6545.14	[74][M]+	[M+CH3CN+H]+ 213.999	105	65	49	TRUE	FALSE
1116	M256T345	256.068	256.063	256.069	345.462	341.443	356.177	80	66	1476	2308.18	2437.76	2201.5	2157.28	2598.19	2072.28	2295.79	1748.37	1780.97	2041.78	2573.55	3522.67	2444.91	3260.24	3997.45	3744.83	2642.33	3163.76	3202.66	2757.14	2791.52	2546.98	4466.91	3480.43	2940.98	6898.98	2977.05	2861.95	3764.5	3032.11	2211.81	4653.69			54	0	0	FALSE	FALSE
1117	M256T363	256.09	256.089	256.102	363.082	360.614	383.804	45	45	837	751.014	2360.96	2012.24	558.507	1056.53	1845.55	1696.9	1288.31	1787.77	1541.7	2405.73	1016.63	1708.87	1944.01	1523.09	2792	1582.44	1899.4	1204.46	2301.72	2700.73	2008.56	4661	4510.07	5229.58	3839.13	4443.93	4054.7	4529.02	4888.71	4991.68	3691.91			21	1	7	TRUE	FALSE
1118	M256T390	256.117	256.114	256.126	389.771	372.252	413.656	47	45	1743	1621.52	1650.75	1862.03	1656.43	1635.36	1644.6	1638.75	1701.96	1506.07	1689.93	3170.97	2774.46	2193.84	3974.09	4779.73	4343.16	3923.49	4367	3184.12	3927.89	3119.49	3374.54	10958.4	10445.5	9777.14	10827.8	10970.2	10943.1	10848.9	8466.28	11560.1	11287.5			106	6	28	TRUE	FALSE
1119	M256T40	256.14	256.137	256.144	40.3055	29.651	67.239	92	70	5126	1402.29	7872.88	1164.84	7879.21	1705.93	8361.5	7983.15	8527.25	8069.6	8251.39	23760.9	33797.1	41979.5	37564.7	21285.7	34983.5	55990.5	23796.4	55180.9	38281.6	46635.8	21918.4	16420.6	8277.62	20571.6	7459.48	2758.31	5895.38	1163.07	7410.95	480.095	1272			2	0	0	FALSE	FALSE
1120	M256T688	256.299	256.298	256.3	687.601	680.939	690.723	86	82	34441	342409	239089	254508	312106	245124	319253	312048	344306	303534	340578	186576	189537	309975	209819	143296	196165	150460	182985	330115	252370	417438	286220	315886	270208	229134	370264	343138	259656	316841	325869	316557	305535	[75][M]+		109	81	182	FALSE	FALSE
1121	M256T46	256.299	256.298	256.3	46.0645	40.231	61.772	80	79	5603	42828.5	25088.1	33131.6	53716.8	32865.4	41606.9	34696.1	39891.7	49428.9	36336.6	40198.7	28523.9	34359.3	30718.7	35167.9	30512.7	25810.5	22830.8	29473.6	25468.4	45964.2	36121.9	40495.9	30981	34742.6	35922.4	54411.1	46592.3	40545.3	35365.4	38413.9	35822.6		[M+Na]+ 233.31	12	16	45	TRUE	FALSE
[truncated: 4,873 more rows]
[truncated: 18 more columns]
