# Supplementary material for: Comparative metabolomic analyses of Dendrobium officinale Kimura et Migo responding to UV-B radiation reveal variations in the metabolisms associated with its bioactive ingredients
Source: PeerJ. 2020 Jun 29;8:e9107. doi: 10.7717/peerj.9107 (PMC7331624; doi:10.7717/peerj.9107)
Supplement: Table S3 [file peerj-08-9107-s006.xlsx]

## Sheet: Sheet1
Table S3 The detail information of the 1403 metabolites grouped into 10 primary metabolic categories.
name	Control_78	Control_9	Control_17	Control_24	Control_32	Control_40	Control_47	Control_55	Control_63	Control_70	UV-B_81	UV-B_12	UV-B_20	UV-B_28	UV-B_35	UV-B_43	UV-B_51	UV-B_58	UV-B_66	UV-B_74	category
M167T173	11378.2	8076.3	10682.8	9105.32	11498.6	6446.59	10045.7	9946.15	10974.5	10230	16624.9	12617.8	17345.3	26802.7	25462.6	12942.9	16897.6	32510.5	15283.2	12140.2	Alkaloid
M184T112	5434.54	4856.01	4990.99	4448.11	4954.53	4616.67	5129.01	4891.33	5049.82	4782.91	44561	48166	62189.1	39163.2	60512.3	38688.9	49854.5	43689.6	58990.9	39028	Alkaloid
M263T437	2989.01	2836.08	3629.17	2830.16	3589.75	2555.8	2948.54	3612.31	2801.05	2755	4342.61	4807.06	5683.62	5888.07	5121.48	4098.02	4820.93	3682.14	4306.48	4136.82	Alkaloid
M263T423	3484.73	3755.23	4286.41	3014.09	4295.23	4903.56	3763.24	3405.35	3216.95	5922.66	6467.12	5216.71	13329.6	4822.22	7623.08	5215.21	6658.02	5365.67	6225.52	5378.95	Alkaloid
M321T31	3173.21	2457.99	3503.17	1833.43	2537.1	899.6	981.291	824.232	2891.49	716.487	4818.09	10202.5	5334.41	11462.1	6150.23	11125.3	5585.11	14377.1	4591.72	11476.4	Alkaloid
M321T31	3173.21	2457.99	3503.17	1833.43	2537.1	899.6	981.291	824.232	2891.49	716.487	4818.09	10202.5	5334.41	11462.1	6150.23	11125.3	5585.11	14377.1	4591.72	11476.4	Alkaloid
M217T215	9047.62	7912.39	6151.69	9045.32	6554.29	13802	8333.43	8566.2	7927.1	10321.7	13966.9	20743.5	24993.1	20241	13084	21905.1	26353.9	21786.8	15159.2	20811.7	Alkaloid
M323T31	1597.45	1486.9	707.425	1848.02	1867.4	1547.11	1360.43	1664.63	1785.4	1718.16	3084.31	5593.06	2925.02	3149.98	3597.06	5362.52	1290.91	5525.38	3005.38	5083.68	Alkaloid
M156T210	905.973	695.814	466.26	835.826	448.433	905.537	1137.65	1525.34	627.693	714.319	1624.85	1594.13	1312.84	1379.65	1344.7	2006.45	1606.57	1906.08	1446.98	1956.12	Alkaloid
M167T173	11378.2	8076.3	10682.8	9105.32	11498.6	6446.59	10045.7	9946.15	10974.5	10230	16624.9	12617.8	17345.3	26802.7	25462.6	12942.9	16897.6	32510.5	15283.2	12140.2	Alkaloid
M184T112	5434.54	4856.01	4990.99	4448.11	4954.53	4616.67	5129.01	4891.33	5049.82	4782.91	44561	48166	62189.1	39163.2	60512.3	38688.9	49854.5	43689.6	58990.9	39028	Alkaloid
M86T269	10422.1	8968.88	9472.28	9901.33	9483.73	9956.43	10291.1	12123.5	10741.2	9257.01	92579.6	71092.9	88633.7	72191.2	93502	82055.7	95703.7	77785.5	90971.2	85865.6	Alkaloid
M160T309	7478.63	4266.37	2230.27	4591.72	6488.53	8928.14	7330.84	8420.84	11436.1	5740.2	750.407	534.187	710.228	1014.59	877.882	537.692	888.385	473.222	946.722	758.616	Alkaloid
M177T407	4320.24	5192.9	5465.65	6282.56	4731.73	6129.11	5621.07	5760.71	4634.49	4595.98	2038.6	2467.29	1899.14	2270.32	1924.74	2024.42	1964.86	2041.7	1870.86	1963.67	Alkaloid
M177T515	3369.44	6121.33	1998.99	5200.19	3329.22	5227.88	6675.32	5063.89	3158.16	3804.92	2637.46	4199.47	5822.79	3807.42	5005.45	4230.73	1198.32	7149.74	4866.48	3365.06	Alkaloid
M182T417	4403.61	1550.09	4645.52	1695.72	1359.83	1453.35	1460.52	1392.61	2545.3	1739.49	3879.51	2514.49	2778.87	3407.9	4919.92	2940.92	3643.09	2468.24	2522.15	2896.67	Alkaloid
M208T33	3203.82	3543.56	1986.4	2985.66	1431.39	2731.97	3616.61	3189.97	3218.81	3088.87	12041.2	13699.4	12818.4	13172.4	13337	14278.1	13860.4	16429.3	11736.4	14298.3	Alkaloid
M208T33	3203.82	3543.56	1986.4	2985.66	1431.39	2731.97	3616.61	3189.97	3218.81	3088.87	12041.2	13699.4	12818.4	13172.4	13337	14278.1	13860.4	16429.3	11736.4	14298.3	Alkaloid
M220T168	132757	96146.5	123429	112739	96432	151424	110559	104288	80383.5	164587	5096.38	7071.41	5639.67	8457.27	6358.54	8970.66	4263.17	5897.56	4084.17	7230.23	Alkaloid
M134T408	1875.53	2777.96	2398.54	2111.23	1660	2152.13	2942.28	5652.85	1574.27	3366.03	6195.73	5404.5	6488.75	6787.69	6661.79	5505.83	8356.54	5989.76	6923.5	5233.49	Alkaloid
M123T53	7612.39	7660.47	7422.32	6803.15	9298.38	7318.62	7526.58	8121.51	7166.81	7560.19	33253.9	17108.3	33425.4	14173.2	30921.6	16991	34825.1	18472.3	34176.8	18503.5	Alkaloid
M123T372	2694.25	2858.41	3021.85	2893.66	3931.74	1863.96	3040.76	3007.95	1407.6	2624.83	23594.8	41857.5	31066.9	42553.7	30883.1	44019.6	28197.6	78657.8	25878.2	37806.4	Alkaloid
M116T407	364.766	465.704	490.481	671.878	591.684	713.588	653.24	856.528	583.317	546.881	1558.17	1575.48	1854.93	1753.63	1664.72	1559.09	2399.56	1513.37	2372.38	281.6	Alkaloid
M118T273	9541.28	7193	8413.52	4601.84	7283.94	5202.31	6281.8	6296.21	9930.49	7449.83	6050.93	5067.12	6779.85	6579.26	8094.51	8047.93	8314.07	5286.57	8267.29	6998.23	Alkaloid
M118T304	2482.11	2075.47	6361.04	2468.18	2556.06	1245.47	1996.48	2010.67	4377.35	1264.79	36441.9	28534.3	37853.9	30204.4	37231.5	29787.2	40787.2	28477.3	39077.7	27511	Alkaloid
M129T365	5986.44	6313.98	6527.6	6018.66	5228.46	5049.5	4046.89	7311.37	4369.6	4507.05	1604.34	1939.44	1344.33	1670.26	1608.79	1783.37	1768.66	1790.49	1613.2	1865.55	Alkaloid
M129T365	5986.44	6313.98	6527.6	6018.66	5228.46	5049.5	4046.89	7311.37	4369.6	4507.05	1604.34	1939.44	1344.33	1670.26	1608.79	1783.37	1768.66	1790.49	1613.2	1865.55	Alkaloid
M140T272	5248.31	4004.21	6500.02	4521.71	6825.91	6045.12	4744.52	4076.5	6906.69	3537.53	2983.16	2167.19	1689.42	2783.46	2388.48	2407.25	3160.11	2221.33	2620.21	3186.41	Alkaloid
M145T255	29014.9	29617.9	30577.2	32993.9	30838.1	28410.3	28854.7	37612	27613	34960.6	21519.5	29828.9	24265.3	24964.8	22562.8	26793.6	22546.1	29288.3	25291.8	22068.3	Alkaloid
M145T255	29014.9	29617.9	30577.2	32993.9	30838.1	28410.3	28854.7	37612	27613	34960.6	21519.5	29828.9	24265.3	24964.8	22562.8	26793.6	22546.1	29288.3	25291.8	22068.3	Alkaloid
M145T255	29014.9	29617.9	30577.2	32993.9	30838.1	28410.3	28854.7	37612	27613	34960.6	21519.5	29828.9	24265.3	24964.8	22562.8	26793.6	22546.1	29288.3	25291.8	22068.3	Alkaloid
M156T272	2161.12	1319.99	1020.71	1240.14	1434.99	1414.53	1153.73	1708.52	1823.43	1234.15	977.985	778.708	606.972	603.1	604.556	705.588	802.816	993.083	927.84	752.842	Alkaloid
M162T490	1605	1912.82	1400.5	1856.18	3003.6	1905.15	532.73	1631.83	1163.34	1616.74	629.628	743.589	687.903	579.445	572.426	614.035	859.423	533.272	507.055	581.761	Alkaloid
M162T490	1605	1912.82	1400.5	1856.18	3003.6	1905.15	532.73	1631.83	1163.34	1616.74	629.628	743.589	687.903	579.445	572.426	614.035	859.423	533.272	507.055	581.761	Alkaloid
M162T490	1605	1912.82	1400.5	1856.18	3003.6	1905.15	532.73	1631.83	1163.34	1616.74	629.628	743.589	687.903	579.445	572.426	614.035	859.423	533.272	507.055	581.761	Alkaloid
M166T648	691.026	1831.84	828.75	3654.75	227.014	778.028	1157.26	1125.82	717.838	136.703	613.204	4696.25	731.217	1079.44	87.78	701.453	593.517	942.786	753.963	953.534	Alkaloid
M166T2	762.545	1241.06	1502.55	892.65	695.365	728.522	851.527	893.287	1419.22	967.424	745.11	1061.51	910.853	1047.93	1071.73	826.639	1123.24	717.461	989.668	956.953	Alkaloid
M166T22	1234.37	1633.77	1650.27	1256.85	1208	1235.48	1186.75	1143.43	1400.13	1236.36	1241.14	2043.32	1480.69	1468.62	1187.87	1199.26	1265.57	1223.1	1086.86	1287.01	Alkaloid
M178T142	63814.8	62437.7	44277.2	5981.51	11447.7	62134.7	57350.2	63409.5	60252.2	34258.3	21703.5	18380.3	58678.9	14399.2	16471.4	17654.3	42188.5	30957.9	2504.7	60944	Alkaloid
M180T255	52973.7	55051.7	57415.4	62697.7	56882.5	65223.7	55125.1	63524.2	57176.1	63510.1	31437.7	39379.7	38574.1	40047.5	37242.1	32985.8	39963.7	40270.8	36832.2	43142.9	Alkaloid
M180T255	52973.7	55051.7	57415.4	62697.7	56882.5	65223.7	55125.1	63524.2	57176.1	63510.1	31437.7	39379.7	38574.1	40047.5	37242.1	32985.8	39963.7	40270.8	36832.2	43142.9	Alkaloid
M186T253	5285.38	3683.02	4022.93	432.28	4050.12	4482.37	1338.95	3834.66	4887.28	2996.47	1772.08	1121.46	821.343	1603.68	1893.19	1576.99	1365.21	1471.12	842.582	1415.13	Alkaloid
M186T253	5285.38	3683.02	4022.93	432.28	4050.12	4482.37	1338.95	3834.66	4887.28	2996.47	1772.08	1121.46	821.343	1603.68	1893.19	1576.99	1365.21	1471.12	842.582	1415.13	Alkaloid
M186T253	5285.38	3683.02	4022.93	432.28	4050.12	4482.37	1338.95	3834.66	4887.28	2996.47	1772.08	1121.46	821.343	1603.68	1893.19	1576.99	1365.21	1471.12	842.582	1415.13	Alkaloid
M199T258	1743.53	2744.28	2495.69	2724.18	963.357	1893.2	2169.04	2483.81	1707.35	1262.51	1638.56	2071.96	2604.33	1660.94	2471.27	938.06	2107.94	2417.81	755.379	2297.86	Alkaloid
M228T313	2506.04	1470.72	1499.48	1372.75	1803.82	1517.35	1498.75	2132.92	2112.48	1615.88	10120.6	7850.89	7724.86	7705.05	9251.28	9115.91	11311.2	9164.61	11815.6	8800.29	Alkaloid
M251T339	11488.1	6216.56	2103.82	12583.1	6535.05	14624.9	13685.9	14963	6555.2	14115.5	3671.39	2489.61	3329.22	2859.02	2901.11	2588.39	3020.98	2735.98	2929.3	2844.32	Alkaloid
M340T167	7081.04	41677.6	6665.54	40070.3	6906.61	42218.2	42564.1	43125.4	6619.44	41304.6	1882.69	2015.21	2612.93	2754.28	2537.26	2749.7	2340.64	1853.34	2848.08	1548.61	Alkaloid
M305T207	1287.57	1194.13	984.938	1193.51	972.385	1336.28	2042.1	2810.7	1059.53	2317.02	31152.6	23088.9	28420.4	19909	30539	21283.4	33856.3	24928.4	33418.7	25346.2	Alkaloid
M306T10	478.624	547.861	476.889	475.065	466.51	555.039	447.84	452.771	457.74	486.219	363.153	467.739	365.508	455.525	446.896	406.778	460.796	442.25	408.406	444.427	Alkaloid
M312T247_3	3075.08	3008.69	3971.85	3534.02	2705.57	2582.52	3259.25	3190.61	3178.42	2590.09	67768.1	44105.7	81553.1	53885	76056.8	50329.1	70377	46833.4	58573.1	44026	Alkaloid
M316T142	2382.23	2406.88	1983.45	2211.44	2302.94	949.338	2293.66	1617.01	2237.01	2267.36	4882.41	6073.96	2559.8	2156.81	5176.36	5940.07	1277.67	5629.69	5273.12	5322.12	Alkaloid
M326T415	34795.8	54125.8	31510.6	41355.9	30149.3	42903.3	46972.9	46738.2	31756.2	55981.8	1987.95	2310.77	1283.05	1332.97	2310.11	2175.98	1989.61	2159.77	2048.34	1860.14	Alkaloid
M340T414	9550.36	8771.9	9411.82	8444.95	18026.6	9461.2	10250.9	12892	24164.4	36907	898.255	2260.22	1759.59	2407.57	1987.84	688.058	1814.63	572.465	1566.69	2112.67	Alkaloid
M350T451	977.49	1926.97	801.559	1235.49	918.302	1583.52	1183.69	1222.74	927.099	1609.2	1639.8	473.617	767.06	1323.02	1376.49	1212.43	725.716	1296.12	1676.38	1061.99	Alkaloid
M366T414	10941.8	9748.76	7647.92	9538.51	10167.8	8584.36	6317.98	9614.8	7846.86	9374.27	14014.6	13463.1	14981.8	15266.1	16072.3	14692.6	14725.6	13411.7	12972.9	12655.6	Alkaloid
M366T364	132692	131912	120958	103555	128089	115189	109789	112695	133885	113688	19992.8	9233.73	12326.3	9494.12	15987.6	19297.4	12585.6	9452.43	14432.6	8526.79	Alkaloid
M378T247_2	4009.43	3757.81	4029.58	4142.31	3915.66	2985.61	3685.35	3829.35	3775.57	2911.01	5078.89	1861.62	2457.29	2147.3	5221.37	3786.19	4695.05	2894.44	1866.05	2854.64	Alkaloid
M381T378	627630	567250	678771	588491	618849	562145	602444	580070	775845	566086	33474.6	30162.9	39188.6	35760.5	33316.2	29245.4	29660.1	35057.6	29510.3	28424.5	Alkaloid
M381T45	5364.19	7579.49	4730.25	373.926	4755.43	3957.54	4464.64	5804.98	5442.99	7562.15	45074.4	39816.2	95568	60245.4	96625.4	51981.8	90243.3	35877.7	54201.9	48190.5	Alkaloid
M387T45	12310.2	22138.5	9806.94	11433.1	10932.2	15189	11776.3	8775.2	10813.8	10817.9	57202.5	46382.9	60997.1	42261.8	56139.5	46342	59767	44492.6	51415.9	39184.5	Alkaloid
M410T247	1335.95	1636.95	1636.95	1351.55	1669.25	1478.74	1367.09	1431.39	2176.31	1389.45	3169.53	2899.24	5049.78	2148.79	4310.3	3563.49	3565.51	2005.56	3455.91	2476.58	Alkaloid
M139T342	3016.19	528.87	2941	3599.2	1433.55	1906.2	1886.63	10439.8	1610.67	6821.98	413.673	344.478	404.026	235.086	300.652	339.336	499.199	447.759	358.836	218.692	Alkaloid
M139T197	1650.46	3330.12	780.491	2752.67	1141.72	3572.52	1682.83	1288.69	2366.79	2780.86	1528.71	1716.03	1257.02	1374.89	1814.73	1395.17	1997.77	2060.02	1693.69	1583.17	Alkaloid
M151T186	16539.3	11139.3	12855.4	15487.5	6189.91	14906.4	17484.7	19040.6	26710.8	19817.2	18040.1	31749.1	15744.2	16337.8	18007.9	16254.9	17544.7	39297.8	19391.6	16722.7	Alkaloid
M316T142	2382.23	2406.88	1983.45	2211.44	2302.94	949.338	2293.66	1617.01	2237.01	2267.36	4882.41	6073.96	2559.8	2156.81	5176.36	5940.07	1277.67	5629.69	5273.12	5322.12	Alkaloid
M338T375	5495.42	3831.23	5819.9	4228.68	5184.97	3699.65	4052.33	7203.13	7704.76	3889.05	42352.5	43308.7	43310.8	44523.1	44251.3	41792	42276	38190.9	44953.8	44014.7	Alkaloid
M340T414	9550.36	8771.9	9411.82	8444.95	18026.6	9461.2	10250.9	12892	24164.4	36907	898.255	2260.22	1759.59	2407.57	1987.84	688.058	1814.63	572.465	1566.69	2112.67	Alkaloid
M355T251	32256.1	20134.9	43278	21172.1	39333.1	21371.4	22600.4	20177.5	30804.2	16423.4	3877.78	3159.54	4818.73	3098.71	4423.77	3247.98	3939.23	2286.53	4014.78	437.635	Alkaloid
M355T376	2688.05	3026.94	3188.03	1953.33	3440.42	220.275	1357.3	2456.52	2364.46	2516.08	12931.7	17506.7	13582.9	16248.9	13878.9	15123.8	13401.9	15261.8	13775.3	13476.8	Alkaloid
M375T164	6827.07	6017	6170.39	6292.77	6083.03	6321.43	12393.4	2305.21	5819.99	6241.84	6857.54	7505.18	8979.91	8119.86	6049.83	8452.78	5979.62	7358.35	7875.52	7793.97	Alkaloid
M375T131	7973.82	7476.37	8254.53	12801.7	7675.27	7850.14	1076.78	8379.6	8123.45	7810.01	13240.6	11394	20992.6	11151.6	10214.8	10694.7	15577.7	10919	24555.3	9808.44	Alkaloid
M378T247_2	4009.43	3757.81	4029.58	4142.31	3915.66	2985.61	3685.35	3829.35	3775.57	2911.01	5078.89	1861.62	2457.29	2147.3	5221.37	3786.19	4695.05	2894.44	1866.05	2854.64	Alkaloid
M385T406	1142.8	1262.66	875.248	1038.56	1080.17	1035.78	807.689	1108.92	913.512	1015.06	3369.7	2290.87	3523.63	3290.38	3845.78	2914.97	3138.38	3239.96	3148.96	2636.86	Alkaloid
M393T361	61195.1	52812.4	60371.8	48273.7	53024.3	56483.7	52554.4	56806.7	65595.1	56025.8	10268.9	11072.1	19426.9	13487.6	10764.7	13355.3	16909.4	8110.02	17634.1	7958.79	Alkaloid
M394T366	11340.4	10273.8	12336	8984.79	21672.2	21832.3	9548.09	9358.68	8270.54	8535.04	1717.9	1657.12	1448.16	1981.6	1679.6	1329.71	1824.03	1223.1	1604.23	1192.62	Alkaloid
M401T369	2005.02	1678.71	1836.22	1872.42	2197.01	1521.82	1822.71	1447.75	2100.47	1987.05	4074.49	2255.5	1195.85	1521.98	942.16	1948.16	2283.01	1891.61	4020.45	3184.84	Alkaloid
M410T247	1335.95	1636.95	1636.95	1351.55	1669.25	1478.74	1367.09	1431.39	2176.31	1389.45	3169.53	2899.24	5049.78	2148.79	4310.3	3563.49	3565.51	2005.56	3455.91	2476.58	Alkaloid
M477T107	2095.87	3881.21	2140.81	3372.35	1931.44	3162.32	3106.39	3258.07	1985.17	3154.34	1176.11	2091.48	1580.32	1846.82	1523.82	1662.11	1547.68	1625.16	1361.58	1687.43	Alkaloid
M509T43	8647.55	6238.04	8062.55	5929.35	19230.9	6058.33	6169.84	8005.48	15929.8	7072.06	28627.7	15988.6	23436.8	20589.2	24393.2	19625.1	44867.2	27721.7	26386.3	21786.6	Alkaloid
M509T43	8647.55	6238.04	8062.55	5929.35	19230.9	6058.33	6169.84	8005.48	15929.8	7072.06	28627.7	15988.6	23436.8	20589.2	24393.2	19625.1	44867.2	27721.7	26386.3	21786.6	Alkaloid
M509T147	7513.55	9547.33	9102.8	9596.92	7740.44	10332.8	8487.35	9611.41	8028.51	8632.12	9465.47	13298.4	10700.9	11569.3	10228.3	11204.9	9262.5	10017.4	9888.87	9417.62	Alkaloid
M509T147	7513.55	9547.33	9102.8	9596.92	7740.44	10332.8	8487.35	9611.41	8028.51	8632.12	9465.47	13298.4	10700.9	11569.3	10228.3	11204.9	9262.5	10017.4	9888.87	9417.62	Alkaloid
M524T182	2276.26	2954.39	2800.33	3013.46	2642.22	2711.64	2928.98	2900.06	2640.18	2790.25	4420.16	5937.14	5530.58	5296.94	7964.88	4800.84	6411.84	3237.56	3460.94	4908.44	Alkaloid
M541T42_1	1140.31	3451.18	2425.37	2463.36	639.626	2989.57	1452.66	1907.26	2590.34	3151.5	5108.62	3256.13	6932.13	6597.42	6148.13	5843.38	7537.73	4099.46	7463.15	4544.76	Alkaloid
M541T153	14663.7	6911.49	19503.4	6246.54	17757.5	6676.05	6273.02	15187.9	16475.2	14278	42967.6	32032.3	46603.9	31192.4	52690.1	36176.3	48024.4	39585.9	64239.4	29583.6	Alkaloid
M546T154	15588.2	40374.8	16693.6	59437.8	52648.2	17885.6	59278.2	66889	59488	39498.8	153551	143289	211959	125377	177749	128938	177731	138416	217791	125410	Alkaloid
M546T185	5010.28	4548.59	4747.68	4748.97	4555.28	5232.86	4864.97	4540.72	4504.45	4858.71	5119.14	4461.82	5176.49	4297.68	4895.84	5154.21	5026.76	4441.03	4928.63	4689.57	Alkaloid
M614T41	964.041	1149.68	1019.21	716.9	1458.04	1217.64	1155.15	864.459	1554.6	748.777	716.94	3739.41	1030.78	2472.19	1363.31	2183.65	1053.19	3463.54	1242.16	2775.18	Alkaloid
M614T41	964.041	1149.68	1019.21	716.9	1458.04	1217.64	1155.15	864.459	1554.6	748.777	716.94	3739.41	1030.78	2472.19	1363.31	2183.65	1053.19	3463.54	1242.16	2775.18	Alkaloid
M619T251	51203.3	21351.1	21219.5	27347.6	26569.6	26571.3	25009.4	44584.1	38458.4	42725.7	14260.4	13641.9	10031.1	9950.83	9626.8	13228.6	11023.4	16683.7	13621.1	15408.1	Alkaloid
M619T251	51203.3	21351.1	21219.5	27347.6	26569.6	26571.3	25009.4	44584.1	38458.4	42725.7	14260.4	13641.9	10031.1	9950.83	9626.8	13228.6	11023.4	16683.7	13621.1	15408.1	Alkaloid
M374T377	28770	12822.6	19883.5	10089.6	16196.7	7018.57	11702.3	7017.39	16650.4	8649.8	19877.7	10930.6	18622.2	10898.9	18187.6	9855.37	18157.7	12911.8	16903.2	10536	Alkaloid
M390T308	2896.12	4800.02	2627.55	234.22	1977.92	4718.54	3570.13	3977.48	2003.47	706.642	3469.08	3484.82	2216.63	3538.26	2470.32	3756.67	2734.96	3926.65	4764.04	3254.51	Alkaloid
M351T407	6368.06	8077.03	6272.82	5722.58	6394.11	5240.25	5423.61	5463.08	5886.76	7787.99	1247.97	1394.42	1356.65	1623.52	1827.77	1387.34	1231.12	1626.13	3141.91	1292.82	Alkaloid
M357T417	128223	175504	153301	193324	156989	180362	153491	149546	149715	184113	639.614	4964.41	5442.85	5883.13	1603.92	4779.62	6880.41	5326.4	1710.99	793.115	Alkaloid
M375T377	1572.14	2963.89	2505.36	232.315	3659.24	1657.66	2536.64	2918.54	3331.62	2755.32	3410.07	2130.6	18430.7	1094.05	8240.86	1004.08	7403.1	27243.5	20291.1	1760.57	Alkaloid
M375T377	1572.14	2963.89	2505.36	232.315	3659.24	1657.66	2536.64	2918.54	3331.62	2755.32	3410.07	2130.6	18430.7	1094.05	8240.86	1004.08	7403.1	27243.5	20291.1	1760.57	Alkaloid
M387T255	3953.21	6072.19	5534.87	5456.27	5800.83	5145.29	4602.9	5128.7	4326.43	5377.06	1212.78	6645.49	4429.71	7165.42	8615.87	6487.64	1523.09	6379.76	7940.24	5805.08	Alkaloid
M374T377	28770	12822.6	19883.5	10089.6	16196.7	7018.57	11702.3	7017.39	16650.4	8649.8	19877.7	10930.6	18622.2	10898.9	18187.6	9855.37	18157.7	12911.8	16903.2	10536	Alkaloid
M375T377	1572.14	2963.89	2505.36	232.315	3659.24	1657.66	2536.64	2918.54	3331.62	2755.32	3410.07	2130.6	18430.7	1094.05	8240.86	1004.08	7403.1	27243.5	20291.1	1760.57	Alkaloid
M390T308	2896.12	4800.02	2627.55	234.22	1977.92	4718.54	3570.13	3977.48	2003.47	706.642	3469.08	3484.82	2216.63	3538.26	2470.32	3756.67	2734.96	3926.65	4764.04	3254.51	Alkaloid
M405T378	1413.09	1956.71	1599.96	1988.3	1689.48	2131.49	1830.74	2198.77	1600.7	1951.5	15779.6	8058.92	17354.2	9073.23	14606.6	6260.95	16121.6	5927.99	14117.2	5760.81	Alkaloid
M423T426	11452.7	12684.7	13100.9	13748.2	12572.7	12435.3	10997.8	10868.6	11182.8	9386.46	3838.38	4821.75	5392.51	4799.09	4439.76	3254.24	3642.05	3743.91	3494.14	4036.77	Alkaloid
M432T510	1622.07	1251.25	2120.2	778.069	2027.56	1477.7	1425.75	1235.76	1913.22	1448.54	7664.84	7753.12	6105.91	6028.67	6823.91	5174.16	8817.18	6418.51	6935.22	5226.11	Alkaloid
M437T240	7255.69	10666.9	6709.84	12294.8	5307.93	15626.9	15278	14907.1	5821.08	10643.4	5901.75	4367.92	5075.56	1907.58	5620.69	1806.86	4282.05	4586.48	5169.02	3373.89	Alkaloid
M453T310	4386.13	5898.75	4013.45	6389.96	5074.74	10190.6	6183.62	7802.58	4520.7	10899.3	1908.1	2190.63	1831.3	2424.05	1701.22	2439.95	1915.6	2240.54	1996.07	2645.5	Alkaloid
M453T265	5593.26	5851.27	5886.87	6256.11	5391.99	6471	5684.06	7731.99	6106.97	6901.05	5626.97	5699.56	5601.57	5064.68	5558.42	4857.28	5410.64	5616.2	6345.64	4795.14	Alkaloid
M457T196	27636.7	44835.9	71061.1	47023.6	30713.6	42938.2	35826.7	38022.9	27171	36516.9	42373.6	33330.8	79094.2	76389.5	48434.7	24854.6	44276.7	24856.5	40463.2	22216.1	Alkaloid
M474T416	1731.41	1760.65	887.649	1701.97	2183.66	1942.24	2091.17	1717.37	1854.18	1520.96	3979.33	6893.15	4946.99	10512.4	5649.44	5716.4	4703.34	7877.82	10119.4	4953.61	Alkaloid
M199T258	1743.53	2744.28	2495.69	2724.18	963.357	1893.2	2169.04	2483.81	1707.35	1262.51	1638.56	2071.96	2604.33	1660.94	2471.27	938.06	2107.94	2417.81	755.379	2297.86	alkaloid
M263T437	2989.01	2836.08	3629.17	2830.16	3589.75	2555.8	2948.54	3612.31	2801.05	2755	4342.61	4807.06	5683.62	5888.07	5121.48	4098.02	4820.93	3682.14	4306.48	4136.82	alkaloid
M263T423	3484.73	3755.23	4286.41	3014.09	4295.23	4903.56	3763.24	3405.35	3216.95	5922.66	6467.12	5216.71	13329.6	4822.22	7623.08	5215.21	6658.02	5365.67	6225.52	5378.95	alkaloid
M273T450	3790.01	1287.27	2823.09	2897.2	2784.36	1888.23	1081.58	1392.22	3851.29	1457.76	48383.7	26166.8	29267	56676.6	52334	53191.6	54471.5	41305.9	26627.4	23523.2	alkaloid
M316T142	2382.23	2406.88	1983.45	2211.44	2302.94	949.338	2293.66	1617.01	2237.01	2267.36	4882.41	6073.96	2559.8	2156.81	5176.36	5940.07	1277.67	5629.69	5273.12	5322.12	Alkaloid
M350T371	7370.45	8568.65	8378.05	7910.56	6225.93	8158.68	8640.07	6862.27	7777.08	8512.64	5732.85	7075.95	7501.59	5948.36	6761.82	6666.18	6475.78	6219.52	5465.7	6263.86	Alkaloid
M350T315	7503.53	14707.6	16671.5	12865.3	8838.61	8689.88	12783.2	6500.26	6867.89	6304.58	14455.8	14452.9	5559.69	5780.26	16038	14895.8	13530.2	17127.8	14801.9	16316.3	Alkaloid
M350T451	977.49	1926.97	801.559	1235.49	918.302	1583.52	1183.69	1222.74	927.099	1609.2	1639.8	473.617	767.06	1323.02	1376.49	1212.43	725.716	1296.12	1676.38	1061.99	Alkaloid
M351T407	6368.06	8077.03	6272.82	5722.58	6394.11	5240.25	5423.61	5463.08	5886.76	7787.99	1247.97	1394.42	1356.65	1623.52	1827.77	1387.34	1231.12	1626.13	3141.91	1292.82	Alkaloid
M366T414	10941.8	9748.76	7647.92	9538.51	10167.8	8584.36	6317.98	9614.8	7846.86	9374.27	14014.6	13463.1	14981.8	15266.1	16072.3	14692.6	14725.6	13411.7	12972.9	12655.6	Alkaloid
M366T364	132692	131912	120958	103555	128089	115189	109789	112695	133885	113688	19992.8	9233.73	12326.3	9494.12	15987.6	19297.4	12585.6	9452.43	14432.6	8526.79	Alkaloid
M367T407	7052.03	8229.47	9064.39	8174.93	8473.32	7649.26	6894.73	4993.92	4956.41	6921.53	125208	118392	132647	130921	133051	120979	133980	110192	126632	108444	Alkaloid
M367T40	5061.49	3050.12	4213.36	5667.74	3991.31	2181.33	5405.34	6164.38	3371.6	5188.82	16289.1	28715.2	19023.5	25675	16575.5	29291.6	18285.7	18980.4	20010	21094.3	Alkaloid
M375T377	1572.14	2963.89	2505.36	232.315	3659.24	1657.66	2536.64	2918.54	3331.62	2755.32	3410.07	2130.6	18430.7	1094.05	8240.86	1004.08	7403.1	27243.5	20291.1	1760.57	Alkaloid
M227T323	1327.35	1843.56	2215.62	1646.97	1320.46	1403.16	1862.11	1521.36	2263.66	1113.59	1149.88	922.471	879.731	1022.63	804.551	599.925	883.932	958.005	983.954	1198.54	Alkaloid
M300T216	8370.27	9241.11	10301.9	8506.09	9817.41	14991.7	12046.8	10061	7433.9	8150.84	1282.5	2718.31	3615.27	2166.82	3149.92	1105.57	2070.84	1580.52	1914.42	1514.39	Alkaloid
M354T411	3231.21	2597.33	3693.26	4514.7	2699.94	5270.61	3043.49	3428.06	3825.4	539.88	3065.92	3453.78	3820.38	3107.85	3270.08	3074.9	1175.03	2621.19	2987.34	1054.83	Alkaloid
M364T382	1889.52	1800.53	3470.58	2516.28	2396.88	2625.5	10401.3	2442.82	2004.83	1817.5	2397.5	3972.86	3283.48	3768.73	4978.08	3602	2413.88	3365.51	3325.68	2972.76	Alkaloid
M364T413	2917.56	1103.67	2662.35	2649.86	2766.52	2773.39	2717.81	2830.32	2842.08	3273.65	1492.57	1606.23	1845.21	1561.09	1547.23	1776.34	1857.54	1404.57	1669.66	1627.09	Alkaloid
M368T407	1456.61	1852.34	1755.68	1507.96	1566.86	1705.81	1304.31	1509.26	1416.56	1372.37	11402.5	11212.1	13771.8	12135.8	12731.4	11618.4	12934.9	9508.33	11545	10066.5	Alkaloid
M370T456	2358.72	1793.03	2293.77	1759.42	2198.67	2015.74	2303.41	1076	2219.23	2141.04	3495.16	3490.15	2903.11	2383.74	2555.4	1763.92	2869.09	3778.71	4172.1	1667.03	Alkaloid
M370T40	2175.54	920.465	3082.72	1920.19	3109.33	787.543	3077.13	1400.3	2108.3	2303.48	9303.3	9202.27	12094.9	10061.4	10580.1	8626.52	10720.5	9462.87	12051.3	8500.03	Alkaloid
M386T293	3277.16	3387.3	3593.14	3261.83	2443.47	2784.13	3149.38	2806.25	2984.9	3482.16	4987.16	7751.51	3987.69	6839.16	2995.77	5641.84	2588.68	5285.78	5682.8	5119.34	Alkaloid
M402T150	1349.36	2486.64	1673.15	1106.81	2880.4	672.912	1452.88	2465.63	651.548	2007.85	2612.7	2561.05	2541.26	2016.17	2814.66	1966.93	2287.65	1820.26	2291	1889.31	Alkaloid
M503T502	18654.8	10257.3	11508.8	8971.73	13237.4	11534.5	7228.47	10353.4	19538.3	8067.01	5220.81	6302.26	6007.14	8430.08	6146.13	8701.44	5974.6	6259.09	6703.95	7303.66	Alkaloid
M524T182	2276.26	2954.39	2800.33	3013.46	2642.22	2711.64	2928.98	2900.06	2640.18	2790.25	4420.16	5937.14	5530.58	5296.94	7964.88	4800.84	6411.84	3237.56	3460.94	4908.44	Alkaloid
M541T42_1	1140.31	3451.18	2425.37	2463.36	639.626	2989.57	1452.66	1907.26	2590.34	3151.5	5108.62	3256.13	6932.13	6597.42	6148.13	5843.38	7537.73	4099.46	7463.15	4544.76	Alkaloid
M541T153	14663.7	6911.49	19503.4	6246.54	17757.5	6676.05	6273.02	15187.9	16475.2	14278	42967.6	32032.3	46603.9	31192.4	52690.1	36176.3	48024.4	39585.9	64239.4	29583.6	Alkaloid
M546T154	15588.2	40374.8	16693.6	59437.8	52648.2	17885.6	59278.2	66889	59488	39498.8	153551	143289	211959	125377	177749	128938	177731	138416	217791	125410	Alkaloid
M546T185	5010.28	4548.59	4747.68	4748.97	4555.28	5232.86	4864.97	4540.72	4504.45	4858.71	5119.14	4461.82	5176.49	4297.68	4895.84	5154.21	5026.76	4441.03	4928.63	4689.57	Alkaloid
M266T156	10193.8	4371.03	9088.8	1624.95	19645	3861.28	2019.57	1226.38	21339.8	1554.33	12180.9	7446.62	10089.8	4943.26	11647.3	4717.14	11825.7	6432.31	12238.3	3747.18	Alkaloid
M298T256	52765.2	30307.6	36255.3	30255.6	47129	32842	31493.4	34938	46944.2	33896.7	9183.26	7047.26	13120	9223.55	9121.76	8657.8	8350.76	7966.74	7546.17	7893.79	Alkaloid
M302T157	1982.97	2427.2	3706.86	2634.04	5925.33	3165.66	5608.41	2548.1	4407.34	2222.06	8973.34	4754.32	8902.28	4588.82	7848.03	3977.11	5782.63	7648.09	6541.68	1831.88	Alkaloid
M312T247_3	3075.08	3008.69	3971.85	3534.02	2705.57	2582.52	3259.25	3190.61	3178.42	2590.09	67768.1	44105.7	81553.1	53885	76056.8	50329.1	70377	46833.4	58573.1	44026	Alkaloid
M316T142	2382.23	2406.88	1983.45	2211.44	2302.94	949.338	2293.66	1617.01	2237.01	2267.36	4882.41	6073.96	2559.8	2156.81	5176.36	5940.07	1277.67	5629.69	5273.12	5322.12	Alkaloid
M340T414	9550.36	8771.9	9411.82	8444.95	18026.6	9461.2	10250.9	12892	24164.4	36907	898.255	2260.22	1759.59	2407.57	1987.84	688.058	1814.63	572.465	1566.69	2112.67	Alkaloid
M375T236	2974.79	2221.36	3020.5	2385.82	2962.43	3145.06	2657.47	1954.1	2839.6	2969.13	1141.1	1070.24	1311.74	1124.62	1332.01	1535.95	1682.47	1176.02	1097.77	907.171	Alkaloid
M378T247_2	4009.43	3757.81	4029.58	4142.31	3915.66	2985.61	3685.35	3829.35	3775.57	2911.01	5078.89	1861.62	2457.29	2147.3	5221.37	3786.19	4695.05	2894.44	1866.05	2854.64	Alkaloid
M380T377	24210.2	24595.6	32388.7	15241.5	51799.8	26507.4	24391.3	23792.3	24953.4	23587	156706	36010.4	160197	43618.8	158375	36686.2	81102.8	36676	152973	77621.9	Alkaloid
M380T400	24592.3	24005.3	27299.8	5372.21	6284.62	37698.5	35245.2	34342.6	24991.1	33342.5	11600.6	11397.8	13694.4	11632.1	13215.9	10490.8	12797.7	9477.08	11597.3	9392.4	Alkaloid
M410T247	1335.95	1636.95	1636.95	1351.55	1669.25	1478.74	1367.09	1431.39	2176.31	1389.45	3169.53	2899.24	5049.78	2148.79	4310.3	3563.49	3565.51	2005.56	3455.91	2476.58	Alkaloid
M293T41	12475.6	5289.49	12276.3	6068.16	15937.5	7140.23	6363	8074.17	18085.8	7036.15	11810.4	51269.6	11034.2	53411.8	11860.4	64245.7	13935.6	53483.5	9697.24	56712.1	Alkaloid
M317T321	2111.84	2810.68	2622.58	2266.86	2093.78	2978.37	2287.38	2709.57	2471.53	2771.92	5212.53	1149.88	4783.31	5284.03	4686.34	5974.9	5494.4	5658	5486.55	1341.96	Alkaloid
M333T299	5639	1648.84	6100.83	3416.26	6286.15	2666.27	6225.29	2462.73	6284.98	6588.52	47667.7	57375.9	43433.4	55806.6	38962.7	72049.6	41684.9	61347.8	52617.9	68832.9	Alkaloid
M333T42	6004.1	5728.28	5701.77	5711.12	5621.52	7042.35	6998.75	6027.18	6970.72	4440.61	29405.2	34214.6	33306.4	33048.4	30352.6	27850.9	28162.7	25175.7	31939	25195.4	Alkaloid
M349T451	4749.92	6736.48	1349.91	6963.88	3535.81	6223.93	8293.85	6367	3815.19	6979.64	5452.82	2779.37	6064	3170.02	5901.79	3933.07	5641.18	2119.44	5752.76	3175.31	Alkaloid
M349T41	767.924	5016.19	7197.8	2213.18	5759.9	6606.34	1646.87	3053.5	5052.23	2177.24	24496.7	13741.9	15465.6	12188.8	12441.4	13003.4	11085.1	17117.3	14891.6	14265.8	Alkaloid
M375T377	1572.14	2963.89	2505.36	232.315	3659.24	1657.66	2536.64	2918.54	3331.62	2755.32	3410.07	2130.6	18430.7	1094.05	8240.86	1004.08	7403.1	27243.5	20291.1	1760.57	Alkaloid
M375T377	1572.14	2963.89	2505.36	232.315	3659.24	1657.66	2536.64	2918.54	3331.62	2755.32	3410.07	2130.6	18430.7	1094.05	8240.86	1004.08	7403.1	27243.5	20291.1	1760.57	Alkaloid
M375T377	1572.14	2963.89	2505.36	232.315	3659.24	1657.66	2536.64	2918.54	3331.62	2755.32	3410.07	2130.6	18430.7	1094.05	8240.86	1004.08	7403.1	27243.5	20291.1	1760.57	Alkaloid
M375T377	1572.14	2963.89	2505.36	232.315	3659.24	1657.66	2536.64	2918.54	3331.62	2755.32	3410.07	2130.6	18430.7	1094.05	8240.86	1004.08	7403.1	27243.5	20291.1	1760.57	Alkaloid
M513T182	18842.1	24166.5	28278.6	24780.2	21800.1	2766.32	21050.5	22281	19083.7	20707.5	7979.08	3430.25	3722.42	5536.32	9071.21	7855.38	8792.13	3098.77	8098.63	7950.42	Alkaloid
M863T33	11548	5729.38	13316.5	4609.23	11704.8	5078.52	3965.62	4855.26	12632.8	4222.57	7516.58	63194.9	6717.39	59242.7	7406.69	68942.6	8208.83	70068.7	8552.91	65010.5	Alkaloid
M199T258	1743.53	2744.28	2495.69	2724.18	963.357	1893.2	2169.04	2483.81	1707.35	1262.51	1638.56	2071.96	2604.33	1660.94	2471.27	938.06	2107.94	2417.81	755.379	2297.86	Alkaloid
M334T195	12337.7	14464.1	15229.3	13863.7	12971.4	12128.6	13522.5	15126.7	12990.5	14296.4	9887.35	8314.05	12234.2	8610.1	12691.9	9671.25	11546.1	7514.97	11710.8	6562.76	Alkaloid
M338T375	5495.42	3831.23	5819.9	4228.68	5184.97	3699.65	4052.33	7203.13	7704.76	3889.05	42352.5	43308.7	43310.8	44523.1	44251.3	41792	42276	38190.9	44953.8	44014.7	Alkaloid
M338T375	5495.42	3831.23	5819.9	4228.68	5184.97	3699.65	4052.33	7203.13	7704.76	3889.05	42352.5	43308.7	43310.8	44523.1	44251.3	41792	42276	38190.9	44953.8	44014.7	Alkaloid
M348T309	1725.6	2769.06	2495.11	1994.9	2088.17	2559.84	2540.73	2851.73	2246.88	2437.04	3075.45	4099.75	3496.64	4175.72	4363.2	4382.77	7178.32	8742.41	4732.62	4003.27	Alkaloid
M350T451	977.49	1926.97	801.559	1235.49	918.302	1583.52	1183.69	1222.74	927.099	1609.2	1639.8	473.617	767.06	1323.02	1376.49	1212.43	725.716	1296.12	1676.38	1061.99	Alkaloid
M366T414	10941.8	9748.76	7647.92	9538.51	10167.8	8584.36	6317.98	9614.8	7846.86	9374.27	14014.6	13463.1	14981.8	15266.1	16072.3	14692.6	14725.6	13411.7	12972.9	12655.6	Alkaloid
M366T364	132692	131912	120958	103555	128089	115189	109789	112695	133885	113688	19992.8	9233.73	12326.3	9494.12	15987.6	19297.4	12585.6	9452.43	14432.6	8526.79	Alkaloid
M368T407	1456.61	1852.34	1755.68	1507.96	1566.86	1705.81	1304.31	1509.26	1416.56	1372.37	11402.5	11212.1	13771.8	12135.8	12731.4	11618.4	12934.9	9508.33	11545	10066.5	Alkaloid
M368T407	1456.61	1852.34	1755.68	1507.96	1566.86	1705.81	1304.31	1509.26	1416.56	1372.37	11402.5	11212.1	13771.8	12135.8	12731.4	11618.4	12934.9	9508.33	11545	10066.5	Alkaloid
M389T312	1547.84	1436.92	1721.95	1365.2	1818.85	1883.23	1472.82	1305.92	1845.59	1736.29	2906.14	3367.15	2627.46	3283.82	2605.07	3214.93	2727.9	3190.13	3051.1	2406.27	Alkaloid
M410T247	1335.95	1636.95	1636.95	1351.55	1669.25	1478.74	1367.09	1431.39	2176.31	1389.45	3169.53	2899.24	5049.78	2148.79	4310.3	3563.49	3565.51	2005.56	3455.91	2476.58	Alkaloid
M815T31	997.622	1042.47	1697.46	780.54	1028.05	539.661	556.793	810.771	1401.27	1102.42	1180.57	16470.7	1330.38	17332.9	1609.35	14333.9	1821.87	13089.7	1209.71	12788.5	Alkaloid
M104T372	45363.7	49774.5	45366.9	46083	47410.2	52099.4	50150.4	52634.5	47051.3	48705.3	44935.5	46709.7	48923.1	47108.6	45966.2	51419.4	50538.2	47176.4	43931.6	45503.3	Amino acid
M515T448	3380.92	2183.71	4270.22	3374.06	3929.96	3153.75	3239.31	3316.24	3371.59	3559.09	10083.5	9921.53	6122.33	9702.79	9336.09	10070.7	9233.62	10678.5	9931.98	8865.01	Amino acid
M515T181	1800.85	2234.11	953.235	2447.01	2226.99	1993.62	1305.5	2138.9	2175.39	1849.8	1650.53	2759.29	1658.92	1971.66	2732.95	2061.83	1713.53	2103.6	2080.46	2144.39	Amino acid
M111T345	1270.08	1244.39	1175.23	1394.14	1141.86	1198.84	1270.33	1169.4	1180.17	1586.1	451.972	378.835	445.228	374.623	365.986	303.447	398.019	197.383	562.515	413.635	Amino acid
M129T347	1349.91	1439.98	860.19	1350.35	1049.47	831.183	1273.65	1483.51	1173.08	1120.15	1597.91	770.258	1141.14	1153.38	990.506	1143.21	1719.47	1105.48	1058.83	941.592	Amino acid
M147T346	2487.28	2376.55	2059.07	2339.77	2084.78	1981.36	2166.98	2294	1995.55	2195.04	57838.9	90389	49034.3	92372.4	61613.8	105929	58673.8	99660.2	56794.1	94680	Amino acid
M164T306	3.13859e+06	3.59215e+06	2.8957e+06	3.93589e+06	3.13531e+06	4.10485e+06	4.42488e+06	4.33693e+06	3.27948e+06	4.12752e+06	3548.81	5896.35	2360.23	5400.78	2644.93	6506.57	3088.07	6181.41	3029.86	5107.31	Amino acid
M194T321	3.43552e+06	3.20944e+06	291173	3.45083e+06	2.94074e+06	3.96352e+06	4.13031e+06	3.98635e+06	3.24632e+06	4.25334e+06	1537.39	2016.74	1385.65	2410.61	1034.34	3001.93	1643.78	2693.24	2067.43	2295.38	Amino acid
M199T195	2854.81	1883.21	377.739	2077.05	280.317	799.08	2095.8	3056.37	2719.92	2426.82	3497.15	2633.24	2790.18	2160.68	3406.82	1987.26	3535.15	2489.47	3735.16	2624.06	Amino acid
M199T324	1765.18	2055.65	2219.44	2285.21	1619.53	1393.58	2695.68	2255.82	2097	1508.71	850.668	1533.22	1072.1	1444.13	856.441	1593.5	929.421	1858.17	985.621	1453.55	Amino acid
M118T273	9541.28	7193	8413.52	4601.84	7283.94	5202.31	6281.8	6296.21	9930.49	7449.83	6050.93	5067.12	6779.85	6579.26	8094.51	8047.93	8314.07	5286.57	8267.29	6998.23	Amino acid
M118T304	2482.11	2075.47	6361.04	2468.18	2556.06	1245.47	1996.48	2010.67	4377.35	1264.79	36441.9	28534.3	37853.9	30204.4	37231.5	29787.2	40787.2	28477.3	39077.7	27511	Amino acid
M140T272	5248.31	4004.21	6500.02	4521.71	6825.91	6045.12	4744.52	4076.5	6906.69	3537.53	2983.16	2167.19	1689.42	2783.46	2388.48	2407.25	3160.11	2221.33	2620.21	3186.41	Amino acid
M156T272	2161.12	1319.99	1020.71	1240.14	1434.99	1414.53	1153.73	1708.52	1823.43	1234.15	977.985	778.708	606.972	603.1	604.556	705.588	802.816	993.083	927.84	752.842	Amino acid
M150T247	7737.32	5513.75	7477.96	6625.21	8593.43	3774.33	6145.84	5940.97	6607.64	5638.82	95226.5	80078.7	102494	85284.6	101590	75103.6	112053	89073.7	119139	82707.9	Amino acid
M150T376	1015.86	799.605	1171.98	874.861	801.899	754.79	902.288	736.667	842.406	975.687	8846.92	4141.19	6170.64	3961.16	6409.98	4083.4	6443.7	4592.09	14858.4	3635.29	Amino acid
M150T393	671.003	1127.64	632.258	1088.14	673.768	1032.89	1105.17	1139.05	831.627	1232.05	6404.57	11463.4	5804.7	5160.76	6143.3	5647.48	5582.95	5866.22	6354.74	5158.06	Amino acid
M184T112	5434.54	4856.01	4990.99	4448.11	4954.53	4616.67	5129.01	4891.33	5049.82	4782.91	44561	48166	62189.1	39163.2	60512.3	38688.9	49854.5	43689.6	58990.9	39028	Amino acid
M186T431	2753.24	1945.82	689.985	2023.9	3344.13	2000.46	3245.83	2472.69	2558.95	3465.39	3382.32	4059.37	3615.21	4202.14	1532.35	3834.19	4494.13	3973.02	3745.45	3524.77	Amino acid
M186T405	4410.27	4160.92	3640.7	4021.56	4249.66	4338.28	3659.88	4754.05	4268.19	3372.24	3036.97	4676.76	3125.27	4762.18	3264.39	4120.48	3809	4146.6	2786.04	4041.23	Amino acid
M187T377	2232.95	415.14	2510.62	2382.89	2416.33	2369.54	3432.25	2641	1018.85	2528.34	3556.52	4973.94	9534.05	10135.4	4562.8	5698.13	3859.65	4381.91	4734.25	8126.29	Amino acid
M199T195	2854.81	1883.21	377.739	2077.05	280.317	799.08	2095.8	3056.37	2719.92	2426.82	3497.15	2633.24	2790.18	2160.68	3406.82	1987.26	3535.15	2489.47	3735.16	2624.06	Amino acid
M199T324	1765.18	2055.65	2219.44	2285.21	1619.53	1393.58	2695.68	2255.82	2097	1508.71	850.668	1533.22	1072.1	1444.13	856.441	1593.5	929.421	1858.17	985.621	1453.55	Amino acid
M206T324	1261.91	676.059	1088.47	1143.09	1564.05	1390.6	1424.13	1173.58	1194.51	1676.69	598.934	578.339	666.211	771.752	617.474	728.367	1108.05	737.596	735.126	436.431	Amino acid
M206T210	8000.22	17173.7	13312.3	21244.6	12713.4	16358.2	11650.8	23278	16738.9	21119.2	1157.92	1012.97	1028.37	902.25	1345.74	986.356	1407.52	1227.89	984.007	1240.72	Amino acid
M137T68	68657.1	59630.5	45807.2	82898.8	78102	36210.2	63334.5	43805.5	46334.1	54948.7	392163	689894	1.07316e+06	522294	807671	746547	815378	681794	847155	848097	Amino acid
M137T284	24566	18485.5	26104.9	18723.5	25374.6	22338.2	21566.3	21003.8	27848.1	26710.3	5093.47	13054.9	12118.4	14982.3	4451.7	14584.8	14299.9	14455.5	4969.4	15765.2	Amino acid
M137T195	608131	92821.8	261136	90818.1	463631	100974	98549.1	163814	160396	330669	245071	84399	125025	90985.5	136688	175771	135021	177563	149226	100976	Amino acid
M137T219	34566.7	26715.7	31727.4	38789	39196.9	23917.2	28427.8	43603.2	35722.2	28916.8	51061.6	16785.7	49681	25892.1	49251.9	20664.4	56370	19556.8	61130.2	19335.9	Amino acid
M137T44	112385	124095	107305	119739	100282	131952	136281	132994	122419	142357	1.10181e+06	670430	721716	816452	1.00162e+06	952087	1.16347e+06	1.01622e+06	804110	584416	Amino acid
M137T166	298583	246676	268458	263753	274833	328013	326596	367965	312493	339469	245326	72630	174671	199209	93050.9	193515	227422	197076	165997	162807	Amino acid
M156T210	905.973	695.814	466.26	835.826	448.433	905.537	1137.65	1525.34	627.693	714.319	1624.85	1594.13	1312.84	1379.65	1344.7	2006.45	1606.57	1906.08	1446.98	1956.12	Amino acid
M166T64	14475.3	16313.5	16483.7	16276.8	14987.2	15763.8	15870.3	15100.3	16258.6	14182.5	10297.5	1761.7	11389.5	11656.6	11938.8	11929.1	11171.9	10966	11520.8	9414.61	Amino acid
M182T309	5272.04	15871.2	7789.33	19393	8954.24	15575.7	18048.8	12385.9	9087.27	12714.6	27417	45340.7	32562.8	36381.2	32730.2	39176.4	30953.8	38991.6	31662.2	32968.8	Amino acid
M182T417	4403.61	1550.09	4645.52	1695.72	1359.83	1453.35	1460.52	1392.61	2545.3	1739.49	3879.51	2514.49	2778.87	3407.9	4919.92	2940.92	3643.09	2468.24	2522.15	2896.67	Amino acid
M182T126	6397.51	6553.24	6101.34	6100.21	6339.8	6281.32	7184.56	6789.94	7417.3	7513.55	6530.48	14598.5	11877.7	14214.7	12181	12774.4	16753.6	11923.5	11418.8	13226.7	Amino acid
M182T210	7686.93	5623.21	4926.3	6491.93	5411.46	1556.92	2846.21	4724.9	2858.89	4864.52	4250.38	2765.77	4417.21	2016.92	4795.67	4742.77	5480.87	4433.94	4854.64	4708.21	Amino acid
M191T324	2286.68	1644.95	1827.1	2142.48	2623.32	2044.7	1475.37	2231.01	2239.53	2156.51	4861.1	1073.2	3283.88	1641.02	3680.03	1622.29	5056.02	1819.37	4868.84	2261.88	Amino acid
M199T195	2854.81	1883.21	377.739	2077.05	280.317	799.08	2095.8	3056.37	2719.92	2426.82	3497.15	2633.24	2790.18	2160.68	3406.82	1987.26	3535.15	2489.47	3735.16	2624.06	Amino acid
M199T324	1765.18	2055.65	2219.44	2285.21	1619.53	1393.58	2695.68	2255.82	2097	1508.71	850.668	1533.22	1072.1	1444.13	856.441	1593.5	929.421	1858.17	985.621	1453.55	Amino acid
M208T323	328997	194810	242394	209844	279076	307835	253487	249504	266514	331355	3109.64	756.09	1831.7	1113.88	1718.43	1145.29	2363.52	1055.43	2484.99	793.291	Amino acid
M227T414	1216.78	1988.66	3811.49	2459.06	2678.18	2299.44	2846.77	1486.43	1795.84	2029.88	5842.26	8414.05	7068.23	9072.7	7519.02	7223.4	6739.37	6993.15	5848.75	9573.65	Amino acid
M245T458	1353	1524.62	1676.42	1899.16	1672.48	1735.42	1631.23	1658.88	1175.14	1781.34	5885.76	3739.75	4232.43	4230.77	5023.41	5174.89	5431.76	4112.99	4471.06	3625.91	Amino acid
M245T458	1353	1524.62	1676.42	1899.16	1672.48	1735.42	1631.23	1658.88	1175.14	1781.34	5885.76	3739.75	4232.43	4230.77	5023.41	5174.89	5431.76	4112.99	4471.06	3625.91	Amino acid
M245T427	3245.16	3192.79	1684.46	2704.2	839.455	2463.31	1245.66	2972.76	1495.46	3078.07	3378.85	3948.43	3917.36	2727.41	4188.15	3372.56	4940.04	5276.85	3964.43	3510.08	Amino acid
M245T427	3245.16	3192.79	1684.46	2704.2	839.455	2463.31	1245.66	2972.76	1495.46	3078.07	3378.85	3948.43	3917.36	2727.41	4188.15	3372.56	4940.04	5276.85	3964.43	3510.08	Amino acid
M317T399	871.462	970.385	795.355	910.183	877.508	943.437	722.122	1022.54	883.154	903.237	1333.04	834.259	1312.42	1085.27	694.044	1149.91	573.366	1132.05	1228.87	1160.5	Amino acid
M317T208	5704.42	11023.9	6363.69	6375.21	4689.29	3883.32	3125.94	3924.09	2759.73	3441.11	3026.18	3625.1	2702.31	3061.58	3358.11	2998.29	3405.23	3454.12	2933.1	1276.22	Amino acid
M355T399	630.138	926.76	774.288	666.387	746.162	799.615	740.31	911.807	830.517	920.281	214.967	191.486	255.066	230.89	291.926	206.481	238.659	262.319	226.667	146.123	Amino acid
M383T364	31225.1	34561.7	22642.6	30673.3	26302.4	35669.5	35070.9	25691.3	28544.2	24798.7	3908.43	7102.17	10317.7	11768.5	10359.4	6289.87	9219.25	7002.99	8799.35	5183.47	Amino acid
M383T391	7871.7	9172.82	9434.18	7934.02	8367.46	8503	5627.57	5939.23	7830.92	5097.71	11721.2	8525.16	13245.5	9868.72	9228.79	13210.7	11896.5	8899.96	11876.4	7842.71	Amino acid
M182T271	1284.9	1269.42	1369.75	1231.59	2005.52	1144.62	1179.75	1337.4	2036.87	1110.24	849.29	780.773	508.961	531.244	752.464	1069.59	644.863	773.644	534.24	1088.49	Amino acid
M110T138	4998.75	9157.62	4532.78	8402.28	5263.91	10944.3	10099.7	10427.1	5148.46	10100.5	2139.33	2134.95	2375.1	2138.46	2303.21	2191.69	2193.2	2056.28	2252.68	2120.81	Amino acid
M150T247	7737.32	5513.75	7477.96	6625.21	8593.43	3774.33	6145.84	5940.97	6607.64	5638.82	95226.5	80078.7	102494	85284.6	101590	75103.6	112053	89073.7	119139	82707.9	Amino acid
M150T247	7737.32	5513.75	7477.96	6625.21	8593.43	3774.33	6145.84	5940.97	6607.64	5638.82	95226.5	80078.7	102494	85284.6	101590	75103.6	112053	89073.7	119139	82707.9	Amino acid
M150T376	1015.86	799.605	1171.98	874.861	801.899	754.79	902.288	736.667	842.406	975.687	8846.92	4141.19	6170.64	3961.16	6409.98	4083.4	6443.7	4592.09	14858.4	3635.29	Amino acid
M150T376	1015.86	799.605	1171.98	874.861	801.899	754.79	902.288	736.667	842.406	975.687	8846.92	4141.19	6170.64	3961.16	6409.98	4083.4	6443.7	4592.09	14858.4	3635.29	Amino acid
M150T393	671.003	1127.64	632.258	1088.14	673.768	1032.89	1105.17	1139.05	831.627	1232.05	6404.57	11463.4	5804.7	5160.76	6143.3	5647.48	5582.95	5866.22	6354.74	5158.06	Amino acid
M150T393	671.003	1127.64	632.258	1088.14	673.768	1032.89	1105.17	1139.05	831.627	1232.05	6404.57	11463.4	5804.7	5160.76	6143.3	5647.48	5582.95	5866.22	6354.74	5158.06	Amino acid
M162T33	2548.22	2171.33	2836.07	2102.37	3106	2083.51	2400.26	2296.61	1598.22	1920.71	8997.57	6751.98	7775.06	2226.81	11099.8	2516.92	11370.5	7373.16	1819.07	5796.04	Amino acid
M172T190	3884.85	1770.14	2146.65	1381.7	1919.26	2273.16	1957.18	2142.33	2904.2	1827.22	5747.43	5122.17	3460.91	6783.6	4213.93	5428.99	3975.18	6959.09	5224.57	5785.3	Amino acid
M184T512	1513.25	1647.61	973.431	666.112	264.83	736.099	1482.56	2931.28	616.252	3241.43	980.465	1340.71	1383.91	1625.67	2139.31	2779.76	1041.88	1369.7	2946.25	3184.44	Amino acid
M190T189	267987	95103.2	152045	94464.2	173991	114718	105493	126034	237381	141385	310839	336924	244604	378411	293474	401614	302646	441201	347296	427089	Amino acid
M206T148	128971	54476	127931	52309.5	118968	55733.2	50170.2	59365.6	124107	51168.9	57842	87944.8	69730.4	92919.4	66591.6	86810.4	66219.9	95005.2	78115.4	100321	Amino acid
M206T148	128971	54476	127931	52309.5	118968	55733.2	50170.2	59365.6	124107	51168.9	57842	87944.8	69730.4	92919.4	66591.6	86810.4	66219.9	95005.2	78115.4	100321	Amino acid
M206T234	7733.78	7434.56	6649.45	7214.68	6508.97	7381.05	6941.82	8150.26	7047.96	7833.34	452.949	781.976	505.351	616.076	311.988	658.563	352.232	1036.23	364.529	911.144	Amino acid
M206T234	7733.78	7434.56	6649.45	7214.68	6508.97	7381.05	6941.82	8150.26	7047.96	7833.34	452.949	781.976	505.351	616.076	311.988	658.563	352.232	1036.23	364.529	911.144	Amino acid
M206T352	173.707	113.742	182.46	294.643	346.53	130.63	130.194	117.252	231.056	109.67	88.1079	111.951	124.052	114.249	79.8677	122.093	157.299	146.763	87.2539	102.344	Amino acid
M206T352	173.707	113.742	182.46	294.643	346.53	130.63	130.194	117.252	231.056	109.67	88.1079	111.951	124.052	114.249	79.8677	122.093	157.299	146.763	87.2539	102.344	Amino acid
M206T324	1261.91	676.059	1088.47	1143.09	1564.05	1390.6	1424.13	1173.58	1194.51	1676.69	598.934	578.339	666.211	771.752	617.474	728.367	1108.05	737.596	735.126	436.431	Amino acid
M206T324	1261.91	676.059	1088.47	1143.09	1564.05	1390.6	1424.13	1173.58	1194.51	1676.69	598.934	578.339	666.211	771.752	617.474	728.367	1108.05	737.596	735.126	436.431	Amino acid
M206T210	8000.22	17173.7	13312.3	21244.6	12713.4	16358.2	11650.8	23278	16738.9	21119.2	1157.92	1012.97	1028.37	902.25	1345.74	986.356	1407.52	1227.89	984.007	1240.72	Amino acid
M206T210	8000.22	17173.7	13312.3	21244.6	12713.4	16358.2	11650.8	23278	16738.9	21119.2	1157.92	1012.97	1028.37	902.25	1345.74	986.356	1407.52	1227.89	984.007	1240.72	Amino acid
M234T249	983.393	1667.98	1297.81	1086.04	852.678	1203.15	1147.25	1341.76	1086.42	901.433	2404.72	919.891	1835.16	1961.41	2424.49	794.892	2368.05	473.049	896.681	317.52	Amino acid
M235T148	3161.44	4923.17	6571.65	4110.18	6979.6	3773.12	3092.69	1957.17	4537.93	18271.1	8550.31	11518.3	14476.3	14276.9	10312.4	11896	11010.5	8643.57	4691.58	7897.74	Amino acid
M241T261	1678.18	603.36	1892.48	2125.47	1376.3	1504.2	947.725	1365.84	722.697	1388.52	646.88	2085.57	2763.51	3501.98	2188.32	3182.89	2376.03	3258.51	174.902	2525.67	Amino acid
M241T261	1678.18	603.36	1892.48	2125.47	1376.3	1504.2	947.725	1365.84	722.697	1388.52	646.88	2085.57	2763.51	3501.98	2188.32	3182.89	2376.03	3258.51	174.902	2525.67	Amino acid
M241T261	1678.18	603.36	1892.48	2125.47	1376.3	1504.2	947.725	1365.84	722.697	1388.52	646.88	2085.57	2763.51	3501.98	2188.32	3182.89	2376.03	3258.51	174.902	2525.67	Amino acid
M241T418	1918.31	1984.93	852.5	1981.15	2017.83	2244.71	2009.9	767.471	1012.82	717.843	6267.68	7207.46	7553.29	8203.38	12168.9	6470.71	7208.05	6402.25	7160.02	10560.3	Amino acid
M241T418	1918.31	1984.93	852.5	1981.15	2017.83	2244.71	2009.9	767.471	1012.82	717.843	6267.68	7207.46	7553.29	8203.38	12168.9	6470.71	7208.05	6402.25	7160.02	10560.3	Amino acid
M241T418	1918.31	1984.93	852.5	1981.15	2017.83	2244.71	2009.9	767.471	1012.82	717.843	6267.68	7207.46	7553.29	8203.38	12168.9	6470.71	7208.05	6402.25	7160.02	10560.3	Amino acid
M245T458	1353	1524.62	1676.42	1899.16	1672.48	1735.42	1631.23	1658.88	1175.14	1781.34	5885.76	3739.75	4232.43	4230.77	5023.41	5174.89	5431.76	4112.99	4471.06	3625.91	Amino acid
M245T427	3245.16	3192.79	1684.46	2704.2	839.455	2463.31	1245.66	2972.76	1495.46	3078.07	3378.85	3948.43	3917.36	2727.41	4188.15	3372.56	4940.04	5276.85	3964.43	3510.08	Amino acid
M265T431	534.436	1337.4	938.077	1458.78	927.693	1152.28	1061.44	1265.15	451.52	1099.73	1066.12	1328.8	1179.57	1205.45	1197.9	1555.18	1257.6	1671.79	1027.37	869.531	Amino acid
M270T172	2535.92	1876.97	2950.64	1177.07	2697.15	2580.95	1451.73	1018.59	2321.85	1505.38	4622.95	3686.66	3544.79	3137.38	4381.21	3960.58	5352.41	3168.33	3419.1	3227.55	Amino acid
M275T251	3987.9	5172.65	5365.83	4553.89	1361.72	3960.38	4493.35	3237.04	5147.61	4953.07	2866.69	7024.82	3300	5140.31	7644.07	7667.49	9399.19	6260.7	5564.59	4777.99	Amino acid
M291T342_2	4213.05	3152.61	5843.77	4647.09	4299.3	3635.98	4374.4	4531.18	2564.59	3608.62	750.595	2425.49	1518.37	2276.62	1311.01	1425.17	1015.19	2561.52	3459.38	3069.92	Amino acid
M291T257	2223.8	3389.77	3181.92	2355.51	2856.53	2523.14	3806.03	2882.05	2428.17	2959.18	1317.56	983.859	1873.21	1469.08	1316.4	1215.78	564.023	930.534	1030.59	1194.13	Amino acid
M191T324	2286.68	1644.95	1827.1	2142.48	2623.32	2044.7	1475.37	2231.01	2239.53	2156.51	4861.1	1073.2	3283.88	1641.02	3680.03	1622.29	5056.02	1819.37	4868.84	2261.88	Amino acid
M208T323	328997	194810	242394	209844	279076	307835	253487	249504	266514	331355	3109.64	756.09	1831.7	1113.88	1718.43	1145.29	2363.52	1055.43	2484.99	793.291	Amino acid
M283T171_1	2712.49	8767.21	11141.9	5444.2	5037.2	4181.08	3574.48	2987.8	1444.78	2998.6	38818.6	28025	45165.4	32130.3	41319.8	37273.5	33726.4	27970.5	28602.3	25018.8	Amino acid
M367T282	3364.93	1131.87	3778.61	2393.93	2886.77	2429.93	2496.89	1869.93	3811.86	3304.9	3028.9	2636.57	4386.76	8371.32	4097.48	5882.86	5137.24	4853.48	6408.97	5042.34	Amino acid
M249T347	4532.36	5452.01	2836.83	5779.17	3083.84	6523.11	5194.33	5385.6	4389.54	6379.74	5384.68	3542.16	5717.35	3343.04	5831.88	3879.35	5870.39	3531.95	5867.22	3291.68	Amino acid
M305T302	6428.4	7069.12	6157.77	7637.34	7452.09	6241.17	2132.57	7669.42	8157.27	7856.41	7555.02	7817.74	8343.7	9416.67	8076.66	7429.14	8116.54	8932.07	7671.76	8313.43	Amino acid
M310T298	4292.81	5314.58	3911.25	5350.59	3746.25	5601.88	5505.12	5973.91	4348.03	5564.59	3722.07	4082.87	3811.66	4731.12	3929.4	3993.6	3941.42	3932.07	4421.64	4122.16	Amino acid
M179T285	28552.4	21620.6	30784.1	21797.7	29539.4	22512.2	21511.8	23888.2	33074.4	20932.5	939.208	1917.59	4784.27	2069.88	5080.99	2076.34	5111.94	2345.28	6593.66	2148.63	Amino acid
M179T65	19623.8	24707.7	15284.2	23939.1	18012.4	24112.3	23730.9	24250.7	20664.5	24759.1	314849	181090	316733	152640	332409	220814	310286	228755	315239	200949	Amino acid
M196T42	6743.38	5840.28	6868.43	2554.76	1105.6	6406.83	6314.06	6465.06	6388.55	5953.83	524.426	6467.61	1835.78	4126.66	8131.38	4217.29	3738.15	4914.68	8546.27	9670.5	Amino acid
M196T64	1761.52	5882.7	1497.21	5490.76	1744.2	4298.21	1585.13	4929.76	4041.07	4929.27	980.88	4845.59	3268.74	5105.38	4736.87	6921.57	3726.49	2998.61	3909.47	4373.57	Amino acid
M242T426	21940.9	15331.9	16556.2	21344.7	18412.9	17102.3	22351.6	23814.6	18401	14329.8	14815.9	20671.6	14686.7	14844.3	19360.8	14930	15939.2	19294.4	14092.6	16354.6	Amino acid
M139T342	3016.19	528.87	2941	3599.2	1433.55	1906.2	1886.63	10439.8	1610.67	6821.98	413.673	344.478	404.026	235.086	300.652	339.336	499.199	447.759	358.836	218.692	Amino acid
M139T197	1650.46	3330.12	780.491	2752.67	1141.72	3572.52	1682.83	1288.69	2366.79	2780.86	1528.71	1716.03	1257.02	1374.89	1814.73	1395.17	1997.77	2060.02	1693.69	1583.17	Amino acid
M157T343	1063.75	1195.31	1396.98	1168.09	1322.77	1264.65	1186.71	1552.18	1409.02	1064.51	689.969	560.604	459.63	699.317	578.1	618.567	493.972	538.356	497.404	602.083	Amino acid
M193T345	1752.58	3254.1	2754.78	3778.69	4541.92	3920.07	2952.27	3749.84	3007.6	4631.61	1142.73	1956.74	3155.76	2555.56	1613.79	1997.86	2334.12	1887.61	1532.01	2327.12	Amino acid
M164T33	23997.9	14661.7	25237.3	14893.3	22139.2	15759.3	16318.3	17417.4	29794.8	15893.2	18383.1	38621.5	15683.7	46035.3	18198.1	44005.3	17722.5	47096.9	17315.4	40874.8	Amino acid
M139T342	3016.19	528.87	2941	3599.2	1433.55	1906.2	1886.63	10439.8	1610.67	6821.98	413.673	344.478	404.026	235.086	300.652	339.336	499.199	447.759	358.836	218.692	Amino acid
M139T197	1650.46	3330.12	780.491	2752.67	1141.72	3572.52	1682.83	1288.69	2366.79	2780.86	1528.71	1716.03	1257.02	1374.89	1814.73	1395.17	1997.77	2060.02	1693.69	1583.17	Amino acid
M167T173	11378.2	8076.3	10682.8	9105.32	11498.6	6446.59	10045.7	9946.15	10974.5	10230	16624.9	12617.8	17345.3	26802.7	25462.6	12942.9	16897.6	32510.5	15283.2	12140.2	Amino acid
M184T112	5434.54	4856.01	4990.99	4448.11	4954.53	4616.67	5129.01	4891.33	5049.82	4782.91	44561	48166	62189.1	39163.2	60512.3	38688.9	49854.5	43689.6	58990.9	39028	Amino acid
M184T112	5434.54	4856.01	4990.99	4448.11	4954.53	4616.67	5129.01	4891.33	5049.82	4782.91	44561	48166	62189.1	39163.2	60512.3	38688.9	49854.5	43689.6	58990.9	39028	Amino acid
M186T431	2753.24	1945.82	689.985	2023.9	3344.13	2000.46	3245.83	2472.69	2558.95	3465.39	3382.32	4059.37	3615.21	4202.14	1532.35	3834.19	4494.13	3973.02	3745.45	3524.77	Amino acid
M186T405	4410.27	4160.92	3640.7	4021.56	4249.66	4338.28	3659.88	4754.05	4268.19	3372.24	3036.97	4676.76	3125.27	4762.18	3264.39	4120.48	3809	4146.6	2786.04	4041.23	Amino acid
M206T324	1261.91	676.059	1088.47	1143.09	1564.05	1390.6	1424.13	1173.58	1194.51	1676.69	598.934	578.339	666.211	771.752	617.474	728.367	1108.05	737.596	735.126	436.431	Amino acid
M206T210	8000.22	17173.7	13312.3	21244.6	12713.4	16358.2	11650.8	23278	16738.9	21119.2	1157.92	1012.97	1028.37	902.25	1345.74	986.356	1407.52	1227.89	984.007	1240.72	Amino acid
M124T389	27989	20617.7	21305.8	23192.8	25326.6	27210.3	24906.1	25449.6	26097	26241.1	15099.7	32621.7	13971.6	30039	15374.8	27852.4	15745.5	30790.9	15410.7	26051.6	Amino acid
M124T218	6132.26	4699.98	5002.46	5426.38	2712.82	4478.1	2976.38	4299.8	5334.11	2901.98	4631.71	32545.7	32797.5	3644.81	5915.52	5109.14	27997.2	5679.2	5847.12	5086.22	Amino acid
M141T222	28766.7	29440.8	60603.1	47778.4	23927.1	34299.1	46917.3	64484.8	133314	58823.2	712.354	1639.4	1618.16	1706.72	1836.82	1559.48	1086.54	1939.59	2145.93	2099.61	Amino acid
M146T389	1276.83	1366.11	1485.34	1247.83	1349.72	1319.89	1227.77	1078.57	1218.81	1088.96	1351.8	389.852	969.992	541.952	1119.03	468.594	1077.22	574.185	401.181	519.589	Amino acid
M162T389	944.253	525.081	806.693	783.02	599.734	965.397	748.666	722.368	414.064	504.275	644.304	686.678	983.712	453.123	827.926	434.916	776.93	652.983	468.129	539.981	Amino acid
M172T190	3884.85	1770.14	2146.65	1381.7	1919.26	2273.16	1957.18	2142.33	2904.2	1827.22	5747.43	5122.17	3460.91	6783.6	4213.93	5428.99	3975.18	6959.09	5224.57	5785.3	Amino acid
M190T189	267987	95103.2	152045	94464.2	173991	114718	105493	126034	237381	141385	310839	336924	244604	378411	293474	401614	302646	441201	347296	427089	Amino acid
M104T372	45363.7	49774.5	45366.9	46083	47410.2	52099.4	50150.4	52634.5	47051.3	48705.3	44935.5	46709.7	48923.1	47108.6	45966.2	51419.4	50538.2	47176.4	43931.6	45503.3	Amino acid
M367T282	3364.93	1131.87	3778.61	2393.93	2886.77	2429.93	2496.89	1869.93	3811.86	3304.9	3028.9	2636.57	4386.76	8371.32	4097.48	5882.86	5137.24	4853.48	6408.97	5042.34	Amino acid
M233T386	1651.27	2969.68	1574.93	2081.38	2264.96	2995.78	2526.73	2011.07	1835.68	600.087	9513.81	10755	10197.2	10917.7	10338	10276.6	9623.08	10474.6	9179.37	9245.84	Amino acid
M255T372	3208.56	2714.74	2909.95	3070.82	2607.88	3538.72	2662.19	2718.85	3210.33	2255.09	24220.1	18473.8	13615.4	17820.6	26679.4	11857.8	10766.4	24276.6	11588.8	16411.5	Amino acid
M207T258	52503.2	47278.3	63985.8	49990.3	49460.4	50330.4	51995.4	45140.4	52657.2	47853.5	48525.9	50197.4	58497.8	63849.5	61002.3	60204.9	51233.4	48508.4	44518.6	47620.1	Amino acid
M207T149	5576.86	2590.72	5201.96	1992.5	7030.64	1175.93	3157.92	2661.11	7516.91	3115.09	3466.05	5152.09	4428.33	4218.98	36616.8	5788.83	35862.7	4867.51	4325.35	2552.4	Amino acid
M207T258	52503.2	47278.3	63985.8	49990.3	49460.4	50330.4	51995.4	45140.4	52657.2	47853.5	48525.9	50197.4	58497.8	63849.5	61002.3	60204.9	51233.4	48508.4	44518.6	47620.1	Amino acid
M207T149	5576.86	2590.72	5201.96	1992.5	7030.64	1175.93	3157.92	2661.11	7516.91	3115.09	3466.05	5152.09	4428.33	4218.98	36616.8	5788.83	35862.7	4867.51	4325.35	2552.4	Amino acid
M191T315	2496.53	2890.03	1949.77	2608.76	1758.26	1802	2467.09	2219.02	2221.77	3322.31	3927.1	3395.31	3247.98	3332.8	4591.38	3149.24	4256.03	3765.19	4311.23	3411.14	Amino acid
M197T247	1325.39	2032.6	1207	2106.6	2209.67	6410.87	1246.88	2244.36	1599.13	943.763	1379.7	2167.12	2071.36	2769.56	2614.13	1502.9	2432.92	2707.13	3656.3	3873.97	Amino acid
M197T360	2901.94	2358.28	2283.99	2808.18	2146.85	2259.76	2577.86	2836.25	1580.21	2071.21	469.291	1016.4	1300.52	991.635	1129.83	957.417	1261	957.6	1077.88	899.988	Amino acid
M292T414	395.92	1413.83	531.948	437.224	785.706	1014.85	366.549	943.882	372.598	482.279	310.59	1430.69	816.887	738.838	801.325	1037.3	909.808	1156.02	595.634	932.327	Amino acid
M291T439	14881.2	84737.2	3782.67	81150.9	14968.9	84353.7	75997.3	92557.2	11807.6	85928.3	4017.23	3591.93	4430.59	3936.77	3758.75	4164.51	3732.3	4225.57	3561.53	6183.41	Amino acid
M291T413	3432.74	29291	1743.67	31588.8	3704.67	31260.7	33515.4	28684.8	3413.93	29186.5	6335.63	7429.13	6841.88	7716.33	7884.98	7506.39	6954.92	7129.31	6909.99	7034.66	Amino acid
M308T312	1117.92	2066.38	1360.17	2785.84	1392.49	665.28	1526.85	1906.47	1922.57	1290.45	7978.72	7493.15	9977.12	7157.36	8189.9	6787.94	12037.7	10781.1	9275.7	7556.59	Amino acid
M313T403	906.573	1147.23	1112.53	951.161	1067.53	976.42	811.455	872.513	1609.31	1187	2323.73	3420.37	2208.16	1782.16	2118.02	1101.34	1056.69	1648.65	2252.91	1637.55	Amino acid
M256T345	2308.18	2437.76	2201.5	2157.28	2598.19	2072.28	2295.79	1748.37	1780.97	2041.78	4466.91	3480.43	2940.98	6898.98	2977.05	2861.95	3764.5	3032.11	2211.81	4653.69	Amino acid
M116T313	18250.9	17841.4	17517.2	17039.1	18901.7	21167.5	17110.3	19624.4	19290.4	19746.8	410622	400711	372539	439577	397689	463151	443886	495169	455763	453961	Amino acid
M130T527	21614.6	25485.9	19468.2	20095.5	19213.5	14015.6	10699.6	9286.85	3090.27	14005.3	51428	70918.8	73749.7	58426.2	66492.5	64703	67462.1	51345.8	55537.8	70129.7	Amino acid
M130T311	2565.69	1230.78	838.692	1404.63	1717.25	3857.17	1218.86	2969.17	1364.24	3579.45	2931.96	3236.11	3293.15	3490.81	3617.09	3510.69	3895.48	3512.72	3857.08	3358.48	Amino acid
M130T268	12933.4	13606.4	2224.79	13365	10393.6	17177.8	15123.3	15789.8	11043.3	16088.2	18960.6	18304.5	22121.5	20571.9	20640.3	19735.3	20758	18126.4	22313.8	17585.3	Amino acid
M147T526	23791.7	7162.53	25440.5	19310.1	18013.3	17962.4	20959.6	14902.3	20526.4	29667.8	64372.1	77811	71204.7	70923.3	84147.4	80268.9	93987.1	82768.6	65169.2	73112.3	Amino acid
M218T435	21314.5	20523.6	21025.6	20523	19709.5	20384.2	22605.2	19764	20685.4	20333.4	135548	102744	147055	104999	135871	102640	134807	108936	136049	109306	Amino acid
M218T516	3423	1939.14	2885.07	2242.85	3498.74	2026.08	2517.51	2192.53	3195.96	2276.27	50625	22286.7	7980.06	22817.5	47801.1	18208.1	6269.33	24208.5	11758.9	14119.3	Amino acid
M233T386	1651.27	2969.68	1574.93	2081.38	2264.96	2995.78	2526.73	2011.07	1835.68	600.087	9513.81	10755	10197.2	10917.7	10338	10276.6	9623.08	10474.6	9179.37	9245.84	Amino acid
M233T386	1651.27	2969.68	1574.93	2081.38	2264.96	2995.78	2526.73	2011.07	1835.68	600.087	9513.81	10755	10197.2	10917.7	10338	10276.6	9623.08	10474.6	9179.37	9245.84	Amino acid
M249T405	3319.2	3540.71	4473	3958.07	4458.9	3496.79	3550.58	4043.82	3856.05	3217.55	13429.1	15135.7	16117.1	14412	15102.4	13448.9	15356.5	13480.5	14083.7	12232.6	Amino acid
M255T372	3208.56	2714.74	2909.95	3070.82	2607.88	3538.72	2662.19	2718.85	3210.33	2255.09	24220.1	18473.8	13615.4	17820.6	26679.4	11857.8	10766.4	24276.6	11588.8	16411.5	Amino acid
M255T372	3208.56	2714.74	2909.95	3070.82	2607.88	3538.72	2662.19	2718.85	3210.33	2255.09	24220.1	18473.8	13615.4	17820.6	26679.4	11857.8	10766.4	24276.6	11588.8	16411.5	Amino acid
M313T369	810.965	285.09	482.929	1258.58	964.801	976.981	1140.58	1358.36	1063.3	1296.53	2416.19	3896.04	4439.85	7772.46	3389.86	4350.1	3285.98	3976.54	3160.61	4307.3	Amino acid
M160T309	7478.63	4266.37	2230.27	4591.72	6488.53	8928.14	7330.84	8420.84	11436.1	5740.2	750.407	534.187	710.228	1014.59	877.882	537.692	888.385	473.222	946.722	758.616	Amino acid
M177T407	4320.24	5192.9	5465.65	6282.56	4731.73	6129.11	5621.07	5760.71	4634.49	4595.98	2038.6	2467.29	1899.14	2270.32	1924.74	2024.42	1964.86	2041.7	1870.86	1963.67	Amino acid
M177T515	3369.44	6121.33	1998.99	5200.19	3329.22	5227.88	6675.32	5063.89	3158.16	3804.92	2637.46	4199.47	5822.79	3807.42	5005.45	4230.73	1198.32	7149.74	4866.48	3365.06	Amino acid
M182T417	4403.61	1550.09	4645.52	1695.72	1359.83	1453.35	1460.52	1392.61	2545.3	1739.49	3879.51	2514.49	2778.87	3407.9	4919.92	2940.92	3643.09	2468.24	2522.15	2896.67	Amino acid
M189T291	2637.42	2326.74	5239.81	4182.52	4319.89	4593.22	1050.99	2986.59	4434.78	4978.35	8465.51	15085.7	18058.2	15719.8	9838.26	10113.8	12002.9	14217.9	9616.86	13412.6	Amino acid
M189T528	6312.74	20846.3	5549.64	20054.6	8767.8	19291.9	21124.5	18272.7	9044.79	23942.6	31040	25735	30988.2	27112.2	35811.4	28785.2	32574.9	32390.6	31793.8	26016.2	Amino acid
M205T296	2402.66	1496.9	2582.04	2176.56	3107.02	2308.41	1815.16	4220.09	1282.16	2020.25	7237.53	7002.26	7483.35	7976.67	8050.15	9651.53	9165.96	9276.29	7610.65	7246.6	Amino acid
M205T296	2402.66	1496.9	2582.04	2176.56	3107.02	2308.41	1815.16	4220.09	1282.16	2020.25	7237.53	7002.26	7483.35	7976.67	8050.15	9651.53	9165.96	9276.29	7610.65	7246.6	Amino acid
M219T273	8750.49	10722	4614.1	6196.23	8813.83	7088.44	7234.04	7471.58	6849.02	5967.34	22136.4	21629.6	22832.7	21206.3	24162.4	22101	20152.7	22899.1	25323.1	19451.4	Amino acid
M219T456	1481.53	1353.7	1154.05	1664.16	1496.55	1705.26	1696.72	1745.01	1934.84	1684.77	3238.63	4489.45	4118.43	4167.21	3865.79	4648.65	4179.27	4538.21	3540.26	4051.51	Amino acid
M226T376	1151.62	857.052	1064.83	1101.1	1026.64	1376.07	694.864	599.625	1211.9	844.928	2348.12	1637.12	1900.75	1586.67	712.887	1882.9	2359.97	1847.73	2278.28	1673.8	Amino acid
M227T323	1327.35	1843.56	2215.62	1646.97	1320.46	1403.16	1862.11	1521.36	2263.66	1113.59	1149.88	922.471	879.731	1022.63	804.551	599.925	883.932	958.005	983.954	1198.54	Amino acid
M227T414	1216.78	1988.66	3811.49	2459.06	2678.18	2299.44	2846.77	1486.43	1795.84	2029.88	5842.26	8414.05	7068.23	9072.7	7519.02	7223.4	6739.37	6993.15	5848.75	9573.65	Amino acid
M228T39	9177.88	12478.1	9061.16	9344.47	7171.1	9901.25	8501.04	11172.8	7303.25	9672.18	5534.85	6830	566.514	6420.99	4711.57	2820.89	4176.57	1549.07	5633.77	2060.03	Amino acid
M229T377	2009.87	2196.09	3821.52	3620.55	1828.19	2719.02	3375.2	2612.24	2199.71	2887.4	5297.32	4476.53	4483.72	4568.03	4253.5	3911.83	3371.47	4391.61	5966.22	4449.56	Amino acid
M603T484	1496.06	3931.73	6245.17	1351.34	2213.26	3234.08	3455.58	1571.18	1776.7	2632.02	1096.6	1226.79	2366.73	1350.15	1352.74	1967.95	1346.93	1630.56	1683.68	1628.96	Amino acid
M210T393	784.2	611.927	634.641	324.503	1027.06	519.369	387.84	652.277	594.031	614.699	699.509	775.064	438.073	865.502	620.407	848.659	434.476	673.1	475.695	1308.7	Amino acid
M162T490	1605	1912.82	1400.5	1856.18	3003.6	1905.15	532.73	1631.83	1163.34	1616.74	629.628	743.589	687.903	579.445	572.426	614.035	859.423	533.272	507.055	581.761	Amino acid
M191T315	2496.53	2890.03	1949.77	2608.76	1758.26	1802	2467.09	2219.02	2221.77	3322.31	3927.1	3395.31	3247.98	3332.8	4591.38	3149.24	4256.03	3765.19	4311.23	3411.14	Amino acid
M191T315	2496.53	2890.03	1949.77	2608.76	1758.26	1802	2467.09	2219.02	2221.77	3322.31	3927.1	3395.31	3247.98	3332.8	4591.38	3149.24	4256.03	3765.19	4311.23	3411.14	Amino acid
M274T465	7635.53	6189.5	6815.87	6623.73	6835.68	5656.9	5102.16	4088.8	4735.12	4708.12	17002.6	17562.2	22698.7	15248.5	18870.9	14841.1	16743	12897.7	18089	10363.2	Amino acid
M296T466	927.531	1503.41	791.994	1438.73	511.359	1263.39	1256.4	1004.71	938.741	1277.36	2319.42	1795.84	2035.43	2401.67	2786.5	2750.17	2914.95	1731.98	1474.38	2138.75	Amino acid
M491T443	186.66	1720.13	2010.2	1190.85	1167.97	1002.08	864.667	906.943	1122.53	876.215	1218.03	803.936	1478.46	888.667	1481.78	788.699	1349	1152.41	1129.87	1047.12	Amino acid
M508T390	1415.9	2011.83	1419.58	1775.01	1235.35	1800.26	1930.73	2125.19	1528.85	1883.42	1831.88	1807.03	1485.25	2000.33	973.925	1283.77	1926.26	629.324	1782.98	1855.29	Amino acid
M256T345	2308.18	2437.76	2201.5	2157.28	2598.19	2072.28	2295.79	1748.37	1780.97	2041.78	4466.91	3480.43	2940.98	6898.98	2977.05	2861.95	3764.5	3032.11	2211.81	4653.69	Amino acid
M221T160	6095.76	5715.41	12180	4560.79	9095.35	3822.45	3834.84	3281.37	7234.31	3226.99	3693.77	4382.77	5586.56	4690.55	2495.14	4125.69	3842.34	4344.76	2592.56	3226.27	Amino acid
M227T365	3066.51	2248.46	2526.49	2193.31	1906.88	2863.18	1866.12	1923.15	3563.09	2963.4	10635.2	13263.9	10864	13170.5	11465.9	14728.7	11648.4	13112.5	11306.2	12172.8	Amino acid
M244T42	4731.06	5544.59	5143.21	1474.14	5088	4991.65	4840.44	6506.06	4222.22	5750.69	4385.75	4100.29	3925.76	5171.14	4300.6	618.165	1024.31	2145.68	4337.63	2701.04	Amino acid
M148T399	4556.32	4195.28	2782.03	3669.33	4290.4	3960.69	3017.04	3975.23	4415.59	4090.69	5663.64	6485.65	6108.37	4759.61	5632.7	6247.35	5659.05	6798.76	6447	6394.69	Amino acid
M148T429	1956.59	2433.66	1178.03	1982.82	2138.51	1990.32	2426.64	2421.75	1135.83	2687.01	2477.01	5567.58	5139.55	2896.71	5678.09	2840.62	2741.51	2511.12	2539.76	2990.61	Amino acid
M170T396	1624.26	1033.59	1219.08	951.453	1279.18	1298.07	1239.49	1570.41	1613.26	1087.66	827.57	602.773	913.006	726.302	914.363	891.49	1189.33	944.489	1139.4	502.152	Amino acid
M192T399	607.251	845.505	623.83	440.471	712.661	1162.53	535.826	563.226	412.078	257.996	1466.61	1636.25	1980.32	2228.88	247.299	1487.3	1473.37	1357.35	880.092	1504.47	Amino acid
M141T222	28766.7	29440.8	60603.1	47778.4	23927.1	34299.1	46917.3	64484.8	133314	58823.2	712.354	1639.4	1618.16	1706.72	1836.82	1559.48	1086.54	1939.59	2145.93	2099.61	Amino acid
M141T222	28766.7	29440.8	60603.1	47778.4	23927.1	34299.1	46917.3	64484.8	133314	58823.2	712.354	1639.4	1618.16	1706.72	1836.82	1559.48	1086.54	1939.59	2145.93	2099.61	Amino acid
M147T377	15389.1	17507.2	6953.21	10377.5	7365.42	18408.9	13575.3	17431	14068.4	18115.9	29355	39022	47227.7	37774.5	33797	39734.6	69865.5	38044	33160.5	35913.1	Amino acid
M147T411	6861.84	7591.97	4782.98	7301.03	5449.86	8323.91	5054.19	8716.02	6592.39	9548	9680.9	8308.58	8297.21	9488.22	8584.92	10999.2	9781.31	10671.3	10320.5	11982.9	Amino acid
M158T553	3766.11	2988.9	1717.64	5506.34	5715.29	4626.87	3912.58	2424.86	4671.12	3756.59	1406.36	2977.23	6059.36	2859.12	2894.35	2346.1	2111.02	2348.95	2077.66	4987.52	Amino acid
M158T553	3766.11	2988.9	1717.64	5506.34	5715.29	4626.87	3912.58	2424.86	4671.12	3756.59	1406.36	2977.23	6059.36	2859.12	2894.35	2346.1	2111.02	2348.95	2077.66	4987.52	Amino acid
M176T166	50100.6	79685.3	49607.4	77791	48394.9	82501.4	75453.8	85657.6	55673.9	82230.7	1698.62	3054.33	2406.54	2234.56	2094.54	744.621	2449.26	2658.15	1841.67	2483.76	Amino acid
M259T428	2631.88	1989.72	3929.2	2240.62	2915.2	2187.03	2036.66	3062.15	2919.06	2581.34	4685.46	6778.82	5996.67	6252.44	10074.8	8598.1	5334.83	7445.05	9289.49	4869.94	Amino acid
M276T429	5263.42	5538.76	4339.95	5177.41	4126.72	5482.85	4028.79	6139.87	8025.24	6896.11	10629.8	9506.25	10896.8	8088.82	9902.69	24115.7	16769.1	8584.11	9194.04	12031.4	Amino acid
M281T264	2533.42	2245.52	2588.89	2418.04	2311.39	2244.16	2041.07	2280.99	2173.41	2182.69	2369.3	2706.43	2424.14	2509.57	2674.63	2815.95	2753.56	2753.14	2624.34	2479.11	Amino acid
M356T374	2426.88	1788.84	2495.79	2479.05	2253.17	2842.57	1878.95	2555.45	3403.61	2246.71	8958.51	3178.38	2655.63	2751.19	2386.26	2292.21	1910.83	2233.55	1699.69	2536.53	Amino acid
M463T221	9296.87	15043.8	5776.92	18959	5914.59	7304.57	4207.41	6681.35	4299.41	11954.1	2083.66	2671.24	3875.56	2421.71	2680.85	2188.18	2956.2	2024.82	2177.31	1816.4	Amino acid
M463T266	3871.54	2291.08	3070.74	2823.12	3144.8	2595.86	2268.23	3123.2	3302.65	2166.48	3260.69	3834.62	9691.41	3477.18	3284.76	3496.79	3818.97	3895.95	3749.51	3126.15	Amino acid
M127T229	21070.2	14340	1646.23	15575.8	14926.5	19099.5	19471.7	18301.7	21230.1	18602.2	4503.36	1068.07	3922.78	1395.17	4595.6	1239.32	4176.69	1659.58	5174.39	1716.91	Amino acid
M118T273	9541.28	7193	8413.52	4601.84	7283.94	5202.31	6281.8	6296.21	9930.49	7449.83	6050.93	5067.12	6779.85	6579.26	8094.51	8047.93	8314.07	5286.57	8267.29	6998.23	Amino acid
M118T304	2482.11	2075.47	6361.04	2468.18	2556.06	1245.47	1996.48	2010.67	4377.35	1264.79	36441.9	28534.3	37853.9	30204.4	37231.5	29787.2	40787.2	28477.3	39077.7	27511	Amino acid
M140T272	5248.31	4004.21	6500.02	4521.71	6825.91	6045.12	4744.52	4076.5	6906.69	3537.53	2983.16	2167.19	1689.42	2783.46	2388.48	2407.25	3160.11	2221.33	2620.21	3186.41	Amino acid
M156T272	2161.12	1319.99	1020.71	1240.14	1434.99	1414.53	1153.73	1708.52	1823.43	1234.15	977.985	778.708	606.972	603.1	604.556	705.588	802.816	993.083	927.84	752.842	Amino acid
M141T148	75243.6	63628.2	64922.4	56006.5	63502.5	67885.6	61210.9	75335.3	77203.1	72093.5	8245.11	14427	8402.72	15551.9	7807.22	17586	9204.44	16985.2	8398.32	16196.9	Amino acid
M141T101	10551.1	10195.5	7747.02	11029.2	7907.77	12053.9	12395.3	13291.9	9828.26	13570.5	4982.04	5682.63	5159.16	5890.19	5394.4	5875.34	5464.03	5954.76	5311.94	5310.02	Amino acid
M240T147	2764.06	2239.04	2605.97	2391.59	2448.32	2341.07	2329.31	2434.63	2405.26	2050.33	1991.5	2229.57	2017.13	2005	2061.44	1924.29	1819.02	1983.77	1998.22	1947.06	Amino acid
M90T32	180.186	98.4848	38.4901	220.875	255.061	373.83	352.018	354.852	269.189	145.019	212.747	1014	207.972	630.72	229.74	777.297	374.119	915.452	236.397	1256.22	Amino acid
M90T348	1259.8	1289.43	787.93	1247.25	496.48	1111.27	1733.36	1173.49	1073.95	1464.81	3267.29	3998.11	5633.84	4006.88	5479.04	4621.43	6162.64	4141.51	4190.13	4142.37	Amino acid
M74T21	26365	30427.6	26423.6	33901	16324.3	41944.8	33878.4	29209.8	27851.3	14416.9	13405.3	31666.5	38375.4	31778.3	40361	26621.4	37007.8	38091	26002.5	34431.4	Amino acid
M74T5	22848.7	10923.7	28393.4	28021.7	26142.4	30310.5	27675.2	24085	23112.6	22163.3	21296.6	30288.5	30781.1	29396	11984	18526.6	26507.3	24759.4	22321.2	24394.9	Amino acid
M74T645	35017.8	36747.7	88720.7	87410	22340.6	82870.2	27231.9	9363.02	36757.8	38065.5	30422.2	89997.4	66173.3	23467.7	42862	15496.6	24892.7	38652.9	35536.3	8037.98	Amino acid
M74T704	23575.9	11421.4	10193.8	55983.5	57411.4	29217.3	32250	1159.95	24775.8	24622.6	21569.2	15364.4	31890	34430.8	45432.5	44558.9	32876.1	28469.5	24410.3	8921.46	Amino acid
M288T252	8028	7429.85	10826.4	8696.18	9564.2	8655.51	8080.04	8428.76	12212.1	8089.93	12070.6	12861.5	14286	14303.3	12750.6	12518.5	12928.9	10997	11684.6	10684.5	Amino acid
M288T211	32018.1	26979.3	44957.3	24121.6	35979	25684.4	21630.3	27107.5	32006.1	3954.86	3655.56	5778.55	8465.38	6542.85	5806.83	4686.31	5266.19	3868.81	3244.81	4054.73	Amino acid
M293T324	107908	139278	171239	100792	132829	103900	111418	94254.5	118759	89051.1	110210	175929	161132	149226	155855	142136	137062	139405	125619	132834	Amino acid
M293T340	83850.6	35177.8	64500.4	37025.5	27162.7	86100.9	23884.1	21078	50823.6	76874.2	14232.6	20265.8	14580.7	19657.7	14651.1	19163.2	15130.2	21729.7	15315.7	19615.3	Amino acid
M373T347	3297.23	4918.83	2820.23	3975.47	3380.46	5142.15	4459.37	2916.87	5724.59	3510.24	3348.88	4034.23	7185.8	3203.55	5486.41	2963.62	3601.82	5727.87	7710.5	6725.2	Amino acid
M457T32	1752.97	1332.76	2049.2	1161.19	2327.33	1275.83	938.451	1132.97	2166.92	1483.58	4265.27	5650.54	1281.37	6124.49	4207.72	5066.58	5321.67	5644.81	4862.32	4117.39	Amino acid
M130T376	10833.8	21867.6	16388	20739.2	11306.7	24298.9	16901.6	24114.5	11577.5	23204.9	35361.8	35655.7	42227.2	33345.8	36098.8	58435.1	58458.4	36166.1	32959.9	31694.2	Amino acid
M130T430	5244.3	17194.1	5002.12	9296.07	5232.07	15530.4	5252.25	6908.92	5971.13	9601.94	19224.3	19249.8	23916.1	6631.87	9398.07	10099.8	9745.09	10008.4	18590.4	9441.23	Amino acid
M130T399	6568.89	9252.06	5808.91	8324.41	6314.82	8635.62	3646.66	9048.85	7170.88	10025	18065.9	14691.9	14789.5	16056.7	15446.6	14939.8	17355.3	12592.5	15234.3	13960.8	Amino acid
M147T377	15389.1	17507.2	6953.21	10377.5	7365.42	18408.9	13575.3	17431	14068.4	18115.9	29355	39022	47227.7	37774.5	33797	39734.6	69865.5	38044	33160.5	35913.1	Amino acid
M147T429	4567.63	5746.47	3761.45	4974.1	4173.89	7778.84	4439.77	6067.27	5568.41	8235.8	9598.94	7781.9	5113.68	7021.6	7349.84	26843.1	9076.43	8824.88	32789.3	31131.6	Amino acid
M147T411	6861.84	7591.97	4782.98	7301.03	5449.86	8323.91	5054.19	8716.02	6592.39	9548	9680.9	8308.58	8297.21	9488.22	8584.92	10999.2	9781.31	10671.3	10320.5	11982.9	Amino acid
M152T375	190.503	387.86	377.263	292.821	245.886	323.332	269.886	297.421	277.176	211.033	694.25	247.975	1413.39	720.402	417.835	650.699	1118.09	870.429	1283.31	760.863	Amino acid
M630T459	1434.88	2301	2445.29	2441.34	1251.12	2443.06	2195.68	2297.74	2230.23	2591.02	4272.49	5354.66	5487.04	6939.24	5295.68	5255.48	5696.78	5461.54	4388.82	5054.21	Amino acid
M175T555	287810	346576	163843	260378	325652	367848	377978	266719	189142	380351	254248	285580	219760	361109	631490	86584.8	658264	248912	392840	526578	Amino acid
M175T591	192662	2.46962e+06	562829	1.18552e+06	839495	462297	1.36394e+06	1.1739e+06	178905	1.99741e+06	2.03394e+06	638363	1.07686e+06	813293	955797	755618	1.21509e+06	512356	1.15134e+06	866086	Amino acid
M175T515	1.95907e+06	1.57416e+06	1.0105e+06	3.01291e+06	868258	1.71824e+06	1.97835e+06	2.32152e+06	1.46314e+06	1.84225e+06	1.587e+06	1.34643e+06	1.2569e+06	1.21982e+06	2.32771e+06	1.1792e+06	1.42376e+06	1.27173e+06	2.19083e+06	1.11309e+06	Amino acid
M175T530	583530	1.25696e+06	332873	747217	490703	728425	1.00923e+06	636715	597964	631009	657632	37966	590588	642703	587696	765502	689005	573130	639277	80862.9	Amino acid
M175T482	352107	205760	44384	337630	763281	294573	269231	216692	207248	213676	11141.9	19660.8	24480.9	15905.4	76485.7	19846.3	64918	24032.5	85670.9	16972	Amino acid
M192T163	8460.12	12810.1	7956.6	10128.5	9643.85	9186.4	9089.93	6311.19	10135	7860.49	8070.38	7996.79	9346.42	14280.5	7328.19	8473.12	6795.12	8881.51	6344.3	2655.25	Amino acid
M104T372	45363.7	49774.5	45366.9	46083	47410.2	52099.4	50150.4	52634.5	47051.3	48705.3	44935.5	46709.7	48923.1	47108.6	45966.2	51419.4	50538.2	47176.4	43931.6	45503.3	Amino acid
M233T386	1651.27	2969.68	1574.93	2081.38	2264.96	2995.78	2526.73	2011.07	1835.68	600.087	9513.81	10755	10197.2	10917.7	10338	10276.6	9623.08	10474.6	9179.37	9245.84	Amino acid
M255T372	3208.56	2714.74	2909.95	3070.82	2607.88	3538.72	2662.19	2718.85	3210.33	2255.09	24220.1	18473.8	13615.4	17820.6	26679.4	11857.8	10766.4	24276.6	11588.8	16411.5	Amino acid
M134T408	1875.53	2777.96	2398.54	2111.23	1660	2152.13	2942.28	5652.85	1574.27	3366.03	6195.73	5404.5	6488.75	6787.69	6661.79	5505.83	8356.54	5989.76	6923.5	5233.49	Amino acid
M298T87	32354	33484.2	40182.8	32159.1	34984.6	34169.4	31166.9	32613.1	37211.3	1962.21	2316.6	1973.64	3918.43	2506.8	2217.92	21028.1	2034.47	1908.66	27299.1	18716.4	Amino acid
M320T350	8699.51	14456.4	1342.98	14610.8	9522.02	15600.3	14083.8	15240.6	8684.25	15200.6	1428.89	1785.09	1171.91	1697.42	4311.76	1341.48	767.861	1389.2	1356.83	1416.07	Amino acid
M166T370	2543.69	3657.69	1845.13	2732.66	3768.22	2771.54	3671.33	2740.18	4022.77	4211.9	9808.16	10089	12183	10550.1	10326.2	11347	10798.2	9762.31	9781.97	9351.97	Amino acid
M88T409	658.408	819.584	647.829	870.919	575.678	699.136	797.465	912.896	620.429	732.205	2098.33	1820.28	2000.97	1897.75	2328.84	1628.06	2445.08	2083.88	367.2	2158.36	Amino acid
M166T370	2543.69	3657.69	1845.13	2732.66	3768.22	2771.54	3671.33	2740.18	4022.77	4211.9	9808.16	10089	12183	10550.1	10326.2	11347	10798.2	9762.31	9781.97	9351.97	Amino acid
M186T399	278.924	377.464	265.789	293.049	221.81	232.44	338.831	163.26	287.582	270.923	349.637	460.6	312.493	490.82	331.855	374.776	388.847	428.997	217.653	426.632	Amino acid
M286T389	20266.5	18090.2	18658.5	14895.6	15577.4	18384.8	17348	17315.7	17110.2	15467.4	12387.2	19653.7	13203.7	19997.9	10668.6	17908.8	10914.8	19088.5	11622.2	17660.4	Amino acid
M286T508	1067.14	831.091	647.09	890.247	1019.12	971.847	901.929	970.03	1362.63	1328.68	1102.18	3038.46	1141.94	2418.43	1056.45	2613.56	1201.86	2010.88	1026.47	2121.48	Amino acid
M286T185	4022.54	1187.99	1737.23	2100.2	3962.34	4259.92	4814.9	2377.55	4207.56	4826.39	5376.25	5472.9	5648.15	5401.06	6128.98	5695.94	5780.09	6252.03	6674.6	5379.4	Amino acid
M449T251	3421.08	6504.75	5474.5	5709.44	7211.89	1981.69	2343.74	816.27	3562.42	6044.51	16137.5	8090.79	11676.5	9892.89	13583.2	12438.8	15779.5	9366.02	9548.52	14186.3	Amino acid
M449T343	982.61	1493.81	873.654	1333.91	1263.29	2177.54	1551.87	1182.87	1079.8	1093.81	1243.09	1371.03	1162.78	1474.52	1323.64	1401.1	1112.37	1412.55	1116.41	1180.74	Amino acid
M166T162	12605.9	10463.1	8177.88	9507.5	10018.5	5658.08	5931.76	8925.68	18092.5	5303.61	9331.74	7716.58	8745.15	5715.24	5757.94	3768.69	13667.6	10142.1	13928.4	2992.59	Amino acid
M285T67	83815.1	37695.6	60529.3	49634.3	79319	103896	63048.5	43456	39429.3	94200.1	290116	363512	298107	166698	273928	87760.4	179252	75866.9	155190	190996	Amino acid
M285T43	58037	71727.3	62056.7	58325.2	57848.7	64128.3	61376.2	58626.4	61065.5	57988.9	503226	368179	524113	377281	552809	393325	657669	425906	569394	363033	Amino acid
M182T309	5272.04	15871.2	7789.33	19393	8954.24	15575.7	18048.8	12385.9	9087.27	12714.6	27417	45340.7	32562.8	36381.2	32730.2	39176.4	30953.8	38991.6	31662.2	32968.8	Amino acid
M182T417	4403.61	1550.09	4645.52	1695.72	1359.83	1453.35	1460.52	1392.61	2545.3	1739.49	3879.51	2514.49	2778.87	3407.9	4919.92	2940.92	3643.09	2468.24	2522.15	2896.67	Amino acid
M182T126	6397.51	6553.24	6101.34	6100.21	6339.8	6281.32	7184.56	6789.94	7417.3	7513.55	6530.48	14598.5	11877.7	14214.7	12181	12774.4	16753.6	11923.5	11418.8	13226.7	Amino acid
M182T210	7686.93	5623.21	4926.3	6491.93	5411.46	1556.92	2846.21	4724.9	2858.89	4864.52	4250.38	2765.77	4417.21	2016.92	4795.67	4742.77	5480.87	4433.94	4854.64	4708.21	Amino acid
M269T342	33956	39750.4	28615.9	45421.6	33297.7	49902.3	43016.6	46170.4	33792.4	50190.9	16357	12937.3	18258.8	11749.5	21236.9	13072.4	18171.2	13897.7	23142.6	13799.1	Amino acid
M227T323	1327.35	1843.56	2215.62	1646.97	1320.46	1403.16	1862.11	1521.36	2263.66	1113.59	1149.88	922.471	879.731	1022.63	804.551	599.925	883.932	958.005	983.954	1198.54	Amino acid
M88T409	658.408	819.584	647.829	870.919	575.678	699.136	797.465	912.896	620.429	732.205	2098.33	1820.28	2000.97	1897.75	2328.84	1628.06	2445.08	2083.88	367.2	2158.36	Amino acid
M258T41	1447.68	5132.78	4766.18	5064.2	4716.87	5181.22	3690.84	5013.45	4361.61	4307.27	7384.92	7343.74	6776.1	8085.03	6537.83	7654.95	1942.3	7341.33	7091.14	7159.3	Amino acid
M168T452	1175.67	915.894	762.293	569.402	881.127	1048.16	841.873	895.167	1362.37	959.168	33.7816	222.679	159.051	215.11	162.498	181.267	207.226	209.687	186.898	86.9259	Amino acid
M74T21	26365	30427.6	26423.6	33901	16324.3	41944.8	33878.4	29209.8	27851.3	14416.9	13405.3	31666.5	38375.4	31778.3	40361	26621.4	37007.8	38091	26002.5	34431.4	Amino acid
M74T5	22848.7	10923.7	28393.4	28021.7	26142.4	30310.5	27675.2	24085	23112.6	22163.3	21296.6	30288.5	30781.1	29396	11984	18526.6	26507.3	24759.4	22321.2	24394.9	Amino acid
M74T645	35017.8	36747.7	88720.7	87410	22340.6	82870.2	27231.9	9363.02	36757.8	38065.5	30422.2	89997.4	66173.3	23467.7	42862	15496.6	24892.7	38652.9	35536.3	8037.98	Amino acid
M74T704	23575.9	11421.4	10193.8	55983.5	57411.4	29217.3	32250	1159.95	24775.8	24622.6	21569.2	15364.4	31890	34430.8	45432.5	44558.9	32876.1	28469.5	24410.3	8921.46	Amino acid
M218T435	21314.5	20523.6	21025.6	20523	19709.5	20384.2	22605.2	19764	20685.4	20333.4	135548	102744	147055	104999	135871	102640	134807	108936	136049	109306	Amino acid
M218T516	3423	1939.14	2885.07	2242.85	3498.74	2026.08	2517.51	2192.53	3195.96	2276.27	50625	22286.7	7980.06	22817.5	47801.1	18208.1	6269.33	24208.5	11758.9	14119.3	Amino acid
M246T417	79348.6	88310.7	102363	84935.6	90447.7	92358.6	82025.5	87296.6	87303.4	101824	683045	711156	707743	676173	732267	778882	714002	732229	696432	738023	Amino acid
M246T439	27542.8	13500.9	23525	11667.8	14454.4	24593.9	20844.2	27089.2	31513.6	23807.9	113106	141655	167157	147938	172704	148607	176725	127695	175289	135764	Amino acid
M130T376	10833.8	21867.6	16388	20739.2	11306.7	24298.9	16901.6	24114.5	11577.5	23204.9	35361.8	35655.7	42227.2	33345.8	36098.8	58435.1	58458.4	36166.1	32959.9	31694.2	Amino acid
M130T430	5244.3	17194.1	5002.12	9296.07	5232.07	15530.4	5252.25	6908.92	5971.13	9601.94	19224.3	19249.8	23916.1	6631.87	9398.07	10099.8	9745.09	10008.4	18590.4	9441.23	Amino acid
M130T399	6568.89	9252.06	5808.91	8324.41	6314.82	8635.62	3646.66	9048.85	7170.88	10025	18065.9	14691.9	14789.5	16056.7	15446.6	14939.8	17355.3	12592.5	15234.3	13960.8	Amino acid
M146T358	18278.9	34568.3	19680.6	35501.2	18539.3	33390.6	33748.2	36672.9	18695	34320.4	4938.91	11693	3122.95	11571.6	2853.7	12307	5066.25	11552.2	5320.67	12617.8	Amino acid
M147T377	15389.1	17507.2	6953.21	10377.5	7365.42	18408.9	13575.3	17431	14068.4	18115.9	29355	39022	47227.7	37774.5	33797	39734.6	69865.5	38044	33160.5	35913.1	Amino acid
M147T429	4567.63	5746.47	3761.45	4974.1	4173.89	7778.84	4439.77	6067.27	5568.41	8235.8	9598.94	7781.9	5113.68	7021.6	7349.84	26843.1	9076.43	8824.88	32789.3	31131.6	Amino acid
M147T411	6861.84	7591.97	4782.98	7301.03	5449.86	8323.91	5054.19	8716.02	6592.39	9548	9680.9	8308.58	8297.21	9488.22	8584.92	10999.2	9781.31	10671.3	10320.5	11982.9	Amino acid
M152T375	190.503	387.86	377.263	292.821	245.886	323.332	269.886	297.421	277.176	211.033	694.25	247.975	1413.39	720.402	417.835	650.699	1118.09	870.429	1283.31	760.863	Amino acid
M118T273	9541.28	7193	8413.52	4601.84	7283.94	5202.31	6281.8	6296.21	9930.49	7449.83	6050.93	5067.12	6779.85	6579.26	8094.51	8047.93	8314.07	5286.57	8267.29	6998.23	Amino acid
M118T304	2482.11	2075.47	6361.04	2468.18	2556.06	1245.47	1996.48	2010.67	4377.35	1264.79	36441.9	28534.3	37853.9	30204.4	37231.5	29787.2	40787.2	28477.3	39077.7	27511	Amino acid
M140T272	5248.31	4004.21	6500.02	4521.71	6825.91	6045.12	4744.52	4076.5	6906.69	3537.53	2983.16	2167.19	1689.42	2783.46	2388.48	2407.25	3160.11	2221.33	2620.21	3186.41	Amino acid
M156T272	2161.12	1319.99	1020.71	1240.14	1434.99	1414.53	1153.73	1708.52	1823.43	1234.15	977.985	778.708	606.972	603.1	604.556	705.588	802.816	993.083	927.84	752.842	Amino acid
M378T217	47579.8	73379.1	86018.2	2892.5	93308.6	31887.7	60044.3	107631	66979	37776.3	23922.5	4048.36	1980.69	4211.79	22574.2	6192.26	26283.7	4454.92	2606.35	5214.54	Amino acid
M394T257	1347.28	2223.08	3167.06	2896.11	3257.96	2329.73	2511.55	1346.83	2664.57	465.977	4795.82	5180.93	3421.52	3119.37	6480.34	4372.83	5562.08	4363.74	5014.9	2377.68	Amino acid
M381T45	5364.19	7579.49	4730.25	373.926	4755.43	3957.54	4464.64	5804.98	5442.99	7562.15	45074.4	39816.2	95568	60245.4	96625.4	51981.8	90243.3	35877.7	54201.9	48190.5	Amino acid
M399T45	7965.25	9091.1	8763.58	7659.88	8564.2	11345.5	9170.66	9918.81	6292.63	11819.7	322961	179161	439166	176498	424825	175880	370787	173522	361541	162651	Amino acid
M421T431	1292.33	1797.24	2019.81	1519.75	2073.22	1931.86	1764.88	1238.49	1809.78	270.412	1414.66	1714.57	1620.09	1892.05	2359.51	2568.47	1327.17	1918.15	1613.36	1528.98	Amino acid
M421T352	1966.98	2923.44	2652.35	2366.99	1893.15	3116.07	2693.17	2799.08	2384.91	2498.35	14151.4	11690	10170.8	12032.9	14025.8	12688.3	12441.8	12581.1	11594.7	10450.5	Amino acid
M437T364	2991.94	4639.67	4230.88	4268.46	1084.53	3653.25	3807.25	3329.44	3684	3161.48	2526.15	2759.88	2684.4	2150.81	2455.4	2620.68	2489.96	2187.28	2130.49	2213.62	Amino acid
M437T343	2311.12	2257.4	2338.8	2113.18	1931.04	2086.03	2254.64	2405.26	2417.38	2221.7	6568.07	7008.64	6662.62	6214.06	8600.98	6391.31	6511.44	6627.93	6861.89	6487.89	Amino acid
M305T427	2959.61	11036.5	598.989	8763.24	2651.04	10355.3	5386.19	11392.5	2903	9821.85	2716.77	2677.66	2889.6	2698.62	1769.49	3241.57	2429.49	3095.18	2336.88	1076.3	Amino acid
M129T365	5986.44	6313.98	6527.6	6018.66	5228.46	5049.5	4046.89	7311.37	4369.6	4507.05	1604.34	1939.44	1344.33	1670.26	1608.79	1783.37	1768.66	1790.49	1613.2	1865.55	Amino acid
M130T376	10833.8	21867.6	16388	20739.2	11306.7	24298.9	16901.6	24114.5	11577.5	23204.9	35361.8	35655.7	42227.2	33345.8	36098.8	58435.1	58458.4	36166.1	32959.9	31694.2	Amino acid
M130T376	10833.8	21867.6	16388	20739.2	11306.7	24298.9	16901.6	24114.5	11577.5	23204.9	35361.8	35655.7	42227.2	33345.8	36098.8	58435.1	58458.4	36166.1	32959.9	31694.2	Amino acid
M130T430	5244.3	17194.1	5002.12	9296.07	5232.07	15530.4	5252.25	6908.92	5971.13	9601.94	19224.3	19249.8	23916.1	6631.87	9398.07	10099.8	9745.09	10008.4	18590.4	9441.23	Amino acid
M130T430	5244.3	17194.1	5002.12	9296.07	5232.07	15530.4	5252.25	6908.92	5971.13	9601.94	19224.3	19249.8	23916.1	6631.87	9398.07	10099.8	9745.09	10008.4	18590.4	9441.23	Amino acid
M130T399	6568.89	9252.06	5808.91	8324.41	6314.82	8635.62	3646.66	9048.85	7170.88	10025	18065.9	14691.9	14789.5	16056.7	15446.6	14939.8	17355.3	12592.5	15234.3	13960.8	Amino acid
M130T399	6568.89	9252.06	5808.91	8324.41	6314.82	8635.62	3646.66	9048.85	7170.88	10025	18065.9	14691.9	14789.5	16056.7	15446.6	14939.8	17355.3	12592.5	15234.3	13960.8	Amino acid
M147T377	15389.1	17507.2	6953.21	10377.5	7365.42	18408.9	13575.3	17431	14068.4	18115.9	29355	39022	47227.7	37774.5	33797	39734.6	69865.5	38044	33160.5	35913.1	Amino acid
M147T377	15389.1	17507.2	6953.21	10377.5	7365.42	18408.9	13575.3	17431	14068.4	18115.9	29355	39022	47227.7	37774.5	33797	39734.6	69865.5	38044	33160.5	35913.1	Amino acid
M147T429	4567.63	5746.47	3761.45	4974.1	4173.89	7778.84	4439.77	6067.27	5568.41	8235.8	9598.94	7781.9	5113.68	7021.6	7349.84	26843.1	9076.43	8824.88	32789.3	31131.6	Amino acid
M147T429	4567.63	5746.47	3761.45	4974.1	4173.89	7778.84	4439.77	6067.27	5568.41	8235.8	9598.94	7781.9	5113.68	7021.6	7349.84	26843.1	9076.43	8824.88	32789.3	31131.6	Amino acid
M147T411	6861.84	7591.97	4782.98	7301.03	5449.86	8323.91	5054.19	8716.02	6592.39	9548	9680.9	8308.58	8297.21	9488.22	8584.92	10999.2	9781.31	10671.3	10320.5	11982.9	Amino acid
M147T411	6861.84	7591.97	4782.98	7301.03	5449.86	8323.91	5054.19	8716.02	6592.39	9548	9680.9	8308.58	8297.21	9488.22	8584.92	10999.2	9781.31	10671.3	10320.5	11982.9	Amino acid
M148T399	4556.32	4195.28	2782.03	3669.33	4290.4	3960.69	3017.04	3975.23	4415.59	4090.69	5663.64	6485.65	6108.37	4759.61	5632.7	6247.35	5659.05	6798.76	6447	6394.69	Amino acid
M148T399	4556.32	4195.28	2782.03	3669.33	4290.4	3960.69	3017.04	3975.23	4415.59	4090.69	5663.64	6485.65	6108.37	4759.61	5632.7	6247.35	5659.05	6798.76	6447	6394.69	Amino acid
M148T429	1956.59	2433.66	1178.03	1982.82	2138.51	1990.32	2426.64	2421.75	1135.83	2687.01	2477.01	5567.58	5139.55	2896.71	5678.09	2840.62	2741.51	2511.12	2539.76	2990.61	Amino acid
M148T429	1956.59	2433.66	1178.03	1982.82	2138.51	1990.32	2426.64	2421.75	1135.83	2687.01	2477.01	5567.58	5139.55	2896.71	5678.09	2840.62	2741.51	2511.12	2539.76	2990.61	Amino acid
M152T375	190.503	387.86	377.263	292.821	245.886	323.332	269.886	297.421	277.176	211.033	694.25	247.975	1413.39	720.402	417.835	650.699	1118.09	870.429	1283.31	760.863	Amino acid
M152T375	190.503	387.86	377.263	292.821	245.886	323.332	269.886	297.421	277.176	211.033	694.25	247.975	1413.39	720.402	417.835	650.699	1118.09	870.429	1283.31	760.863	Amino acid
M162T159	15759.4	10473.9	14281.9	14459.2	8739.76	15154.3	14273.1	15056.7	12752.8	8248.72	6780.21	5876.12	8431.38	6097.5	7344.09	5959.71	8357.27	873.828	7476.07	6374.99	Amino acid
M170T396	1624.26	1033.59	1219.08	951.453	1279.18	1298.07	1239.49	1570.41	1613.26	1087.66	827.57	602.773	913.006	726.302	914.363	891.49	1189.33	944.489	1139.4	502.152	Amino acid
M170T396	1624.26	1033.59	1219.08	951.453	1279.18	1298.07	1239.49	1570.41	1613.26	1087.66	827.57	602.773	913.006	726.302	914.363	891.49	1189.33	944.489	1139.4	502.152	Amino acid
M192T399	607.251	845.505	623.83	440.471	712.661	1162.53	535.826	563.226	412.078	257.996	1466.61	1636.25	1980.32	2228.88	247.299	1487.3	1473.37	1357.35	880.092	1504.47	Amino acid
M192T399	607.251	845.505	623.83	440.471	712.661	1162.53	535.826	563.226	412.078	257.996	1466.61	1636.25	1980.32	2228.88	247.299	1487.3	1473.37	1357.35	880.092	1504.47	Amino acid
M198T111	1498.3	4195	3862.7	3841.38	3639.05	3949.9	4063.3	4343.89	2083.16	4092.48	1385.38	3649.4	5589.88	6720.07	3207.91	5437.73	1098.29	6521.59	2056.05	6687.89	Amino acid
M208T134	35753.8	30033.9	34077.8	32710	29465.9	28944.1	27209.4	30071.7	32899.4	30366.4	10671.5	24377.5	9872.62	17198.4	11711.6	16998.8	11934.4	17001.4	11927.1	13839.4	Amino acid
M235T32	1739.62	171741	166617	4864.24	7510.74	7657.78	164625	170784	169960	231982	22391	23783.3	21090.4	13621.5	24721.6	5357.9	19520.3	13033	18431.8	12617.1	Amino acid
M258T41	1447.68	5132.78	4766.18	5064.2	4716.87	5181.22	3690.84	5013.45	4361.61	4307.27	7384.92	7343.74	6776.1	8085.03	6537.83	7654.95	1942.3	7341.33	7091.14	7159.3	Amino acid
M272T212	10376.1	8702.63	4798.57	7884.26	5201.75	10323.6	6704.71	12940	8637.66	11958.5	952.709	1956.8	1647.55	1926.96	1760.17	1927.81	1737.74	1562.76	943.368	1504.57	Amino acid
M277T419	2036.58	7316.89	3705.35	2585.33	3478.68	6065.9	3775.56	4766.61	5475.19	3478.93	8533.6	15620.8	7588.89	8469.58	8868.13	8431.6	16597.9	7485.82	8698.35	7257.39	Amino acid
M298T33_1	1004.08	6016.53	1316.32	6299.8	932.435	895.345	5631.96	6997.23	7103.22	1139.08	32326.3	8449.38	32158.8	10757.9	706.125	7679.94	34232.8	7283.71	4578.36	9207.6	Amino acid
M322T149_1	3794.16	672.637	1011.15	2879.93	4066.94	3306.64	2923.46	3439.36	3630.32	3106.9	4068.93	4192.13	4345.15	4099.58	4466.84	4436.46	4272.59	3983.57	4056.79	339.641	Amino acid
M344T483	537.329	541.569	553.959	508.066	536.536	581.319	491.729	508.322	552.34	546.045	6328.78	5644.91	6902.02	4936.38	6936.11	4808.17	7761.58	5167.75	6228.93	3508.77	Amino acid
M456T181	6353.56	4083.97	4303.93	3491.73	6159.29	4463.26	3493.35	5015.72	5190.03	3980.47	3832.59	1095.9	3286.86	3848.32	4484.26	5338.76	3700.41	3731.36	1004.5	1677.96	Amino acid
M104T372	45363.7	49774.5	45366.9	46083	47410.2	52099.4	50150.4	52634.5	47051.3	48705.3	44935.5	46709.7	48923.1	47108.6	45966.2	51419.4	50538.2	47176.4	43931.6	45503.3	Amino acid
M119T163	9244.96	10376.1	7688.4	7382.84	10591.1	11152.2	3799.9	9402.83	9133.17	10379.9	33798.7	28043.1	39432.4	30146.8	20068.1	24273.8	36298.8	11987.1	15878.6	29157.9	Amino acid
M136T162	1.81721e+06	1.49882e+06	1.78833e+06	1.88686e+06	2.06039e+06	1.87639e+06	1.81326e+06	1.70294e+06	1.68363e+06	1.63128e+06	6.11567e+06	5.15975e+06	6.00029e+06	5.19546e+06	6.73265e+06	2.39381e+06	2.80357e+06	5.12158e+06	6.48767e+06	5.53916e+06	Amino acid
M134T408	1875.53	2777.96	2398.54	2111.23	1660	2152.13	2942.28	5652.85	1574.27	3366.03	6195.73	5404.5	6488.75	6787.69	6661.79	5505.83	8356.54	5989.76	6923.5	5233.49	Amino acid
M104T372	45363.7	49774.5	45366.9	46083	47410.2	52099.4	50150.4	52634.5	47051.3	48705.3	44935.5	46709.7	48923.1	47108.6	45966.2	51419.4	50538.2	47176.4	43931.6	45503.3	Amino acid
M760T190	3624.01	4609.16	2978.56	4527.52	4156.32	5423.89	3586.49	5318.68	3303.94	4222.72	2917.75	3989.01	2572.3	2698.91	3311.24	2862.06	3981.86	2315.3	3043.96	3358.64	Amino acid
M162T490	1605	1912.82	1400.5	1856.18	3003.6	1905.15	532.73	1631.83	1163.34	1616.74	629.628	743.589	687.903	579.445	572.426	614.035	859.423	533.272	507.055	581.761	Amino acid
M290T403	1414.56	1822.96	1278.86	1526.9	1593.67	1380.61	1358.08	1872.47	1325.88	1673.84	5020.88	5487.88	10573.1	5093.35	10103.2	5286.41	5915.26	6880.62	4600.56	4315.48	Amino acid
M312T403	1227.58	1300.76	1200.73	1205.47	1279.42	1140.88	832.289	1381.38	1213	1286.8	7554.36	9100.15	9014.46	8889.76	9309.11	8384.27	8794.79	7962.44	7678.44	7269.08	Amino acid
M328T403	2083.03	2903.13	2236.28	2918.72	2013.34	2621.74	2478.34	2884.03	2208.48	3516.97	7732.54	9842.52	9020	8701.12	9043.01	9177.12	8212.58	8923.74	7926.77	8338.92	Amino acid
M465T224	2516.04	2125.75	2916.54	2624.95	3072.94	2217.59	2447.88	2214.98	2513.92	2222.49	1173.56	1657.27	1417.87	1562.79	1495.18	1447.88	1448.31	1355.82	1369.15	1362.48	Carotenoid
M465T306	5940.4	6825.99	4256.11	7414.66	6448.3	6518.52	1711.55	6294.61	1939.25	3165.75	6662.46	7702.27	6153.43	7445.51	6346.07	7711.82	2615.7	8404.47	2322.66	7177.35	Carotenoid
M331T41	179856	210297	194705	207615	186795	206390	191313	219483	200278	194140	1.39524e+06	1.44191e+06	1.61825e+06	1.44166e+06	1.38931e+06	1.33629e+06	1.32511e+06	1.25232e+06	1.489e+06	1.25654e+06	Carotenoid
M331T183	41891.3	56727.8	40611	44617.7	39872.6	52880.8	54932.5	49289.1	44387.5	50878.9	67478.9	63031.6	68016	58694.8	61745	61259.5	71687.5	62535.6	70629.5	64719.6	Carotenoid
M331T153	18926.7	20199.5	16360.3	18209.5	18984.2	18785	19105.6	24096.7	17067.6	19176.4	561858	418145	514258	401122	594272	419731	609084	477881	363425	478863	Carotenoid
M607T28	17486.5	26198.7	21694.9	21017.3	20063.2	21193.7	18800.6	16091.7	16431.1	18173.6	16953.5	15767.7	20754.8	18804.7	18535.2	13932.4	19780.9	15631.1	16360.9	13892.1	Carotenoid
M267T173	4388.25	4376.39	2227.81	3992.1	3696.25	4279.29	2072.94	4050.22	2892.81	897.275	8395.39	10770.6	9398.54	10800.6	9438.16	3440.94	9618.35	11273.8	8425.02	4978.06	Carotenoid
M285T82	3322.34	3444.52	3519.14	3251.33	3307.21	3584.26	3123.48	3566.38	2941.82	3500.52	6283.5	9430.01	6900.07	9838.11	6319.36	9499.95	6869.56	9845.17	7028.52	9251.18	Carotenoid
M303T122	5041.94	5390.04	4790.81	4951.91	4900.83	5168.63	5013.85	5147.47	5106.23	4856.83	7091.02	12587	7913.36	7392.53	7819.43	5455.64	8305.32	15454	7495.61	8906.56	Carotenoid
M303T76	6263.52	6692.67	6816.66	7482.5	6202.52	6650.19	6362.59	5813.24	6466.03	6709.58	8280.74	11565.5	8684.49	629.411	8149.63	8902.13	8313.23	10580.1	8762.48	8796.13	Carotenoid
M303T173	4699.11	5515.1	1979.64	5869.8	4098.31	5593.09	5609.45	5622.98	4507.18	5716.64	6802.75	9936.87	10051.4	8193.78	10219.2	6399.49	10637.5	6906.49	12339.1	11592.5	Carotenoid
M303T42_2	2110.65	1630.87	3556.51	2926.38	4644.71	7988.97	7803.71	7398.74	5248.29	6400.59	12821.8	17250.7	15241.7	16195.1	11026.8	13949.2	12277.3	19982.1	10964.7	15139.2	Carotenoid
M325T36	3310.79	3379.07	3506.04	2888.73	5366.55	4798.06	1946.04	3085.84	4212.54	3597	5174.98	11091.1	9211.79	4242.96	4728.79	8514.34	3763.09	5718.8	8243.1	11157.1	Carotenoid
M607T28	17486.5	26198.7	21694.9	21017.3	20063.2	21193.7	18800.6	16091.7	16431.1	18173.6	16953.5	15767.7	20754.8	18804.7	18535.2	13932.4	19780.9	15631.1	16360.9	13892.1	Carotenoid
M271T151	11384.7	9060.69	9871.51	10152.2	9254.44	10386.8	10184.2	10618.3	10427.3	10857.7	4011.83	31193.9	2492.4	31010.6	34632.4	31891.4	3319.95	31968.2	1013.17	31530	Carotenoid
M607T28	17486.5	26198.7	21694.9	21017.3	20063.2	21193.7	18800.6	16091.7	16431.1	18173.6	16953.5	15767.7	20754.8	18804.7	18535.2	13932.4	19780.9	15631.1	16360.9	13892.1	Carotenoid
M257T162	10258.8	10071.4	10214.4	9142.4	10001.9	8486.23	9798.22	10591.8	10253	12230.8	9192.48	14499.4	6816.06	2803.46	5505.25	7005.9	3312.48	14048.8	9033.67	6411.3	Carotenoid
M301T236	6314.15	3222.66	4195.97	5699.23	6269.77	4470.31	3396.13	4686.68	8216.94	4766.37	10467.7	13526.5	9323.25	22625.7	8677.86	14101.2	9625.35	15062.8	11146.6	13475.8	Fatty acid
M301T203	3195.69	2768.88	1847.97	1619.18	2139.11	2282.96	1979.52	2583.64	1851.5	2588.75	3591.67	5349.22	3690.85	5179.23	3992.54	5146.17	4106.87	5316.76	4508.38	5640.33	Fatty acid
M301T172	7706.19	6131.44	6810.61	7016.04	6045.24	6573.53	7208.34	7063.28	3898.51	7631.86	13635.5	16551.1	14187.2	15129.6	13222.6	7668.94	13178.5	16939.3	12392.1	11344.7	Fatty acid
M301T149	24571.3	48550.3	12490.1	31633.6	10616.1	35649.9	29928.1	33388.2	11049.8	40810.6	13413.3	24146.2	13645.6	11064.1	12705.6	20390.5	8986.83	19770.8	14040.4	11111.6	Fatty acid
M317T175	8553.38	23502.1	7519.23	7415.42	7261.19	6936.1	7432.09	7496.38	9304.52	9733.77	18283.4	17745.1	20306.6	32398.6	19921.1	30485	9398.65	16863.9	14502.6	18859.9	Fatty acid
M317T175	8553.38	23502.1	7519.23	7415.42	7261.19	6936.1	7432.09	7496.38	9304.52	9733.77	18283.4	17745.1	20306.6	32398.6	19921.1	30485	9398.65	16863.9	14502.6	18859.9	Fatty acid
M317T128	2736.47	3340.18	2460.01	3483.33	2265.41	3123.99	2953.48	2763.11	2265.8	3494.31	4406.39	6962.3	5003.38	6435.65	4476.27	5548.03	4629.25	6241.93	4366.62	6019.81	Fatty acid
M317T128	2736.47	3340.18	2460.01	3483.33	2265.41	3123.99	2953.48	2763.11	2265.8	3494.31	4406.39	6962.3	5003.38	6435.65	4476.27	5548.03	4629.25	6241.93	4366.62	6019.81	Fatty acid
M319T170	6085.81	6052.44	694.28	2275.22	8003.09	5420.79	957.51	5907.36	5701.38	6162.52	9640.21	11031.9	8970	17945.1	4212.82	23468.1	7509.3	11844	9584	11469.6	Fatty acid
M319T170	6085.81	6052.44	694.28	2275.22	8003.09	5420.79	957.51	5907.36	5701.38	6162.52	9640.21	11031.9	8970	17945.1	4212.82	23468.1	7509.3	11844	9584	11469.6	Fatty acid
M348T233	1480.68	858.326	607.001	649.502	619.485	1120	715.613	337.461	1422.51	790.774	226.991	309.933	217.772	312.693	219.233	298.998	327.4	364.415	190.407	488.677	Fatty acid
M348T233	1480.68	858.326	607.001	649.502	619.485	1120	715.613	337.461	1422.51	790.774	226.991	309.933	217.772	312.693	219.233	298.998	327.4	364.415	190.407	488.677	Fatty acid
M348T233	1480.68	858.326	607.001	649.502	619.485	1120	715.613	337.461	1422.51	790.774	226.991	309.933	217.772	312.693	219.233	298.998	327.4	364.415	190.407	488.677	Fatty acid
M133T162	15934	47860.2	26482.4	21376.6	31773.6	45349.5	42572.4	26060.2	53706.1	22873.8	29289.5	36370.2	29415.3	43891	9806.32	34886.3	36335.2	11497.3	12444.5	7415.33	Fatty acid
M133T162	15934	47860.2	26482.4	21376.6	31773.6	45349.5	42572.4	26060.2	53706.1	22873.8	29289.5	36370.2	29415.3	43891	9806.32	34886.3	36335.2	11497.3	12444.5	7415.33	Fatty acid
M133T162	15934	47860.2	26482.4	21376.6	31773.6	45349.5	42572.4	26060.2	53706.1	22873.8	29289.5	36370.2	29415.3	43891	9806.32	34886.3	36335.2	11497.3	12444.5	7415.33	Fatty acid
M133T41	12161.6	5751.48	13035.5	2497.75	10640.3	10332.6	11345.7	5364.49	11528.9	6733.11	27337.7	34770.5	25347.1	24092.8	41512.6	35211.9	37981	50554.3	33573.6	48073.9	Fatty acid
M133T41	12161.6	5751.48	13035.5	2497.75	10640.3	10332.6	11345.7	5364.49	11528.9	6733.11	27337.7	34770.5	25347.1	24092.8	41512.6	35211.9	37981	50554.3	33573.6	48073.9	Fatty acid
M133T41	12161.6	5751.48	13035.5	2497.75	10640.3	10332.6	11345.7	5364.49	11528.9	6733.11	27337.7	34770.5	25347.1	24092.8	41512.6	35211.9	37981	50554.3	33573.6	48073.9	Fatty acid
M151T161	22127.4	37279.2	5231.72	4943.72	13486.9	39132.4	42176	42314.6	19768.6	7097.77	9969.01	11283.5	12215.5	10180.4	7588.81	37644.7	7287.31	37987.9	10918.7	36435.9	Fatty acid
M151T161	22127.4	37279.2	5231.72	4943.72	13486.9	39132.4	42176	42314.6	19768.6	7097.77	9969.01	11283.5	12215.5	10180.4	7588.81	37644.7	7287.31	37987.9	10918.7	36435.9	Fatty acid
M151T161	22127.4	37279.2	5231.72	4943.72	13486.9	39132.4	42176	42314.6	19768.6	7097.77	9969.01	11283.5	12215.5	10180.4	7588.81	37644.7	7287.31	37987.9	10918.7	36435.9	Fatty acid
M151T161	22127.4	37279.2	5231.72	4943.72	13486.9	39132.4	42176	42314.6	19768.6	7097.77	9969.01	11283.5	12215.5	10180.4	7588.81	37644.7	7287.31	37987.9	10918.7	36435.9	Fatty acid
M151T161	22127.4	37279.2	5231.72	4943.72	13486.9	39132.4	42176	42314.6	19768.6	7097.77	9969.01	11283.5	12215.5	10180.4	7588.81	37644.7	7287.31	37987.9	10918.7	36435.9	Fatty acid
M151T161	22127.4	37279.2	5231.72	4943.72	13486.9	39132.4	42176	42314.6	19768.6	7097.77	9969.01	11283.5	12215.5	10180.4	7588.81	37644.7	7287.31	37987.9	10918.7	36435.9	Fatty acid
M151T161	22127.4	37279.2	5231.72	4943.72	13486.9	39132.4	42176	42314.6	19768.6	7097.77	9969.01	11283.5	12215.5	10180.4	7588.81	37644.7	7287.31	37987.9	10918.7	36435.9	Fatty acid
M151T41	6627.53	3861.83	5150.26	30937	28799.9	32070	31593	8221.65	2058.33	5058.72	17803.2	25845.8	14234.6	26867	19312.2	14956.4	17928.5	17626.7	19845.2	24195.9	Fatty acid
M151T41	6627.53	3861.83	5150.26	30937	28799.9	32070	31593	8221.65	2058.33	5058.72	17803.2	25845.8	14234.6	26867	19312.2	14956.4	17928.5	17626.7	19845.2	24195.9	Fatty acid
M151T41	6627.53	3861.83	5150.26	30937	28799.9	32070	31593	8221.65	2058.33	5058.72	17803.2	25845.8	14234.6	26867	19312.2	14956.4	17928.5	17626.7	19845.2	24195.9	Fatty acid
M167T110	16309	17350.2	15869.9	16241.8	14760	16141.2	16894.9	16839.8	15957.3	16518.7	17575	24793.2	19157.7	27373.9	19300.7	27292.9	20167.6	27924.1	18575.9	24596.2	Fatty acid
M167T110	16309	17350.2	15869.9	16241.8	14760	16141.2	16894.9	16839.8	15957.3	16518.7	17575	24793.2	19157.7	27373.9	19300.7	27292.9	20167.6	27924.1	18575.9	24596.2	Fatty acid
M168T169	82417.4	39292.6	85545.6	43745.8	87586.3	58543.7	62084.9	62631.2	88643.1	61443.4	7088.7	2346.58	2687.23	3616.09	1443.04	3705.92	8058.89	3488.94	7498.35	6626.63	Fatty acid
M168T169	82417.4	39292.6	85545.6	43745.8	87586.3	58543.7	62084.9	62631.2	88643.1	61443.4	7088.7	2346.58	2687.23	3616.09	1443.04	3705.92	8058.89	3488.94	7498.35	6626.63	Fatty acid
M168T169	82417.4	39292.6	85545.6	43745.8	87586.3	58543.7	62084.9	62631.2	88643.1	61443.4	7088.7	2346.58	2687.23	3616.09	1443.04	3705.92	8058.89	3488.94	7498.35	6626.63	Fatty acid
M173T38	11848.1	1283.27	13075.6	11340.1	11231	10148.7	10483	10949.5	1179.93	11094	27429.5	12587.6	8604.04	11996.1	5647.68	8794.09	8712.9	10357	2023.54	8223	Fatty acid
M173T38	11848.1	1283.27	13075.6	11340.1	11231	10148.7	10483	10949.5	1179.93	11094	27429.5	12587.6	8604.04	11996.1	5647.68	8794.09	8712.9	10357	2023.54	8223	Fatty acid
M173T38	11848.1	1283.27	13075.6	11340.1	11231	10148.7	10483	10949.5	1179.93	11094	27429.5	12587.6	8604.04	11996.1	5647.68	8794.09	8712.9	10357	2023.54	8223	Fatty acid
M225T163	3122.98	7279.78	1674.06	39439.4	3249.76	44153.1	4153.1	4553.23	4246.51	3358.33	2665.91	16029.3	9513.97	15159.6	8830.44	17558.8	10734.7	17463.4	11245.7	1885.79	Fatty acid
M225T163	3122.98	7279.78	1674.06	39439.4	3249.76	44153.1	4153.1	4553.23	4246.51	3358.33	2665.91	16029.3	9513.97	15159.6	8830.44	17558.8	10734.7	17463.4	11245.7	1885.79	Fatty acid
M225T163	3122.98	7279.78	1674.06	39439.4	3249.76	44153.1	4153.1	4553.23	4246.51	3358.33	2665.91	16029.3	9513.97	15159.6	8830.44	17558.8	10734.7	17463.4	11245.7	1885.79	Fatty acid
M225T163	3122.98	7279.78	1674.06	39439.4	3249.76	44153.1	4153.1	4553.23	4246.51	3358.33	2665.91	16029.3	9513.97	15159.6	8830.44	17558.8	10734.7	17463.4	11245.7	1885.79	Fatty acid
M274T57	154407	172358	142052	284131	255053	134956	55514.7	140709	152461	148891	84729.2	267202	160422	148804	154667	272164	84467.9	163533	147540	165936	Fatty acid
M1121T506	29345.8	33703.4	63273.8	31163.3	33026.4	31813.1	36335.6	23369.2	35771.4	24900.2	32335.8	36907.1	34705.4	35979.3	33572.3	41871.9	34897.4	27382.2	28482	32132	Fatty acid
M218T68	9008.63	6511.84	4806.61	9773.28	10338.7	5899.51	9719.25	6541.45	6967.36	10112.9	2931	5146.57	6045.14	7033.34	5329.28	5408.14	2606.17	6563.9	5877.23	3246.84	Fatty acid
M251T184	3828.23	3739.46	3135.59	3869.22	3475.12	3973.39	4070.18	4462.45	3813.27	3970.17	8046.66	8744.19	7793.5	9058.09	8715.27	8739.65	8868.73	7723.64	863.024	748.547	Fatty acid
M267T33	17384.4	9618.62	12191.6	7871.19	13861.3	7608.74	8759.27	9101.44	16132.1	8264.38	12407.9	36902.7	12641.2	54903.5	13859.2	56372.4	9072.55	56698.6	15614.2	51539.4	Fatty acid
M267T57	7449.05	8080.17	8224.75	8734.55	9761.94	8362.19	8536.64	6764.14	7490.62	7868.88	6917.75	13046	10427.1	11798.8	8975.05	10675.6	8530.5	9062.29	8359.11	9617	Fatty acid
M301T236	6314.15	3222.66	4195.97	5699.23	6269.77	4470.31	3396.13	4686.68	8216.94	4766.37	10467.7	13526.5	9323.25	22625.7	8677.86	14101.2	9625.35	15062.8	11146.6	13475.8	Fatty acid
M301T203	3195.69	2768.88	1847.97	1619.18	2139.11	2282.96	1979.52	2583.64	1851.5	2588.75	3591.67	5349.22	3690.85	5179.23	3992.54	5146.17	4106.87	5316.76	4508.38	5640.33	Fatty acid
M301T172	7706.19	6131.44	6810.61	7016.04	6045.24	6573.53	7208.34	7063.28	3898.51	7631.86	13635.5	16551.1	14187.2	15129.6	13222.6	7668.94	13178.5	16939.3	12392.1	11344.7	Fatty acid
M301T149	24571.3	48550.3	12490.1	31633.6	10616.1	35649.9	29928.1	33388.2	11049.8	40810.6	13413.3	24146.2	13645.6	11064.1	12705.6	20390.5	8986.83	19770.8	14040.4	11111.6	Fatty acid
M267T189	3375.45	3837.99	2803.07	3483.66	3280.1	1783.43	3585.96	4240.03	2621.59	4081.41	7586.35	9639.46	8514.08	9130.29	8172.91	8854.3	7672.95	4376.99	8634.65	9383.46	Fatty acid
M285T170	4129.79	5653.24	5299.49	4572.3	5361.04	5003.77	4474.49	5264.69	4577.72	4027.09	5563.79	12842.1	8695.52	21757.3	9512.38	11668.8	27369.5	10213.2	11202.3	9894.34	Fatty acid
M303T169	5834.88	2263.31	5744.35	4146.74	4993.31	3519.5	3350.19	2822.55	1113.05	3557.33	5645.45	14318.1	7851.66	15186.6	11996.2	8649.24	10879.2	14302.2	6789.54	13038.1	Fatty acid
M303T189	360.122	2030.44	3886.99	4059.72	4050.52	4322.62	1658.39	3535.08	3757.94	4387.99	7801.38	22787.5	7946.89	18576.4	11099	10973.4	7568.29	11399	8337.98	7287.82	Fatty acid
M371T408	935.275	39813.5	32932.6	34669.2	32022	38343.1	33551.9	1140.19	1110.6	34973.8	10205.7	10300	10747.1	11151.4	11087.9	13648.1	11621.2	10238	10906.9	8858.09	Fatty acid
M293T62	47690	49100.7	85099.6	80863.6	72019.3	48961.7	71701.6	57249.2	91883.9	87547.7	14316.3	14543.4	28154.6	14094	28546.8	10277.6	26217.5	16278.4	18022.3	11138.1	Fatty acid
M315T175	1327.25	1080.01	9662.78	13282.6	9825.11	8519.39	11298.4	19240.9	7681.67	9342.68	15147.2	20548.9	46931.9	51926.8	13940.6	19129.4	10831.6	11177.6	43179.8	16573.8	Fatty acid
M315T138	6807.64	5863.55	6258.13	5582.02	6055.69	6352.05	5718.48	6315.58	6518.74	5700.92	23820.9	32290.3	27040.6	29600.4	22406.1	27744.1	21763.2	33265.3	22325	27940	Fatty acid
M333T44	23266.4	26829.6	25077.2	25220	22672.3	30998.1	28830	32710.3	21464.2	29913.5	26195.1	18213.2	15411.3	22549.5	32237.1	24082.7	17673.8	28505.5	28472.8	26486.5	Fatty acid
M160T384	932.267	484.551	993.683	636.706	1098.76	718.582	584.131	674.03	921.494	597.802	698.03	839.35	1100.83	1034.05	750.88	1230.57	866.408	1146.92	875.795	837.93	Fatty acid
M293T62	47690	49100.7	85099.6	80863.6	72019.3	48961.7	71701.6	57249.2	91883.9	87547.7	14316.3	14543.4	28154.6	14094	28546.8	10277.6	26217.5	16278.4	18022.3	11138.1	Fatty acid
M293T62	47690	49100.7	85099.6	80863.6	72019.3	48961.7	71701.6	57249.2	91883.9	87547.7	14316.3	14543.4	28154.6	14094	28546.8	10277.6	26217.5	16278.4	18022.3	11138.1	Fatty acid
M299T173	4524.4	4888.73	4038.33	4782.7	4058.6	4527.55	4828.3	4854.94	4429.59	5038.78	12486.7	18996.3	13884.4	43951.2	17877.9	17278.1	15788.7	13286.9	35258.3	18769.3	Fatty acid
M299T96	9049.21	10665.6	9745.06	9505.64	8554.15	10069.2	9712.37	4525.53	9398.84	9559.18	14295.4	22787	11202	21900.1	15591.2	40326.4	15456.5	23037.6	19211.8	12489.6	Fatty acid
M315T175	1327.25	1080.01	9662.78	13282.6	9825.11	8519.39	11298.4	19240.9	7681.67	9342.68	15147.2	20548.9	46931.9	51926.8	13940.6	19129.4	10831.6	11177.6	43179.8	16573.8	Fatty acid
M315T175	1327.25	1080.01	9662.78	13282.6	9825.11	8519.39	11298.4	19240.9	7681.67	9342.68	15147.2	20548.9	46931.9	51926.8	13940.6	19129.4	10831.6	11177.6	43179.8	16573.8	Fatty acid
M315T138	6807.64	5863.55	6258.13	5582.02	6055.69	6352.05	5718.48	6315.58	6518.74	5700.92	23820.9	32290.3	27040.6	29600.4	22406.1	27744.1	21763.2	33265.3	22325	27940	Fatty acid
M315T138	6807.64	5863.55	6258.13	5582.02	6055.69	6352.05	5718.48	6315.58	6518.74	5700.92	23820.9	32290.3	27040.6	29600.4	22406.1	27744.1	21763.2	33265.3	22325	27940	Fatty acid
M333T44	23266.4	26829.6	25077.2	25220	22672.3	30998.1	28830	32710.3	21464.2	29913.5	26195.1	18213.2	15411.3	22549.5	32237.1	24082.7	17673.8	28505.5	28472.8	26486.5	Fatty acid
M293T62	47690	49100.7	85099.6	80863.6	72019.3	48961.7	71701.6	57249.2	91883.9	87547.7	14316.3	14543.4	28154.6	14094	28546.8	10277.6	26217.5	16278.4	18022.3	11138.1	Fatty acid
M315T175	1327.25	1080.01	9662.78	13282.6	9825.11	8519.39	11298.4	19240.9	7681.67	9342.68	15147.2	20548.9	46931.9	51926.8	13940.6	19129.4	10831.6	11177.6	43179.8	16573.8	Fatty acid
M315T138	6807.64	5863.55	6258.13	5582.02	6055.69	6352.05	5718.48	6315.58	6518.74	5700.92	23820.9	32290.3	27040.6	29600.4	22406.1	27744.1	21763.2	33265.3	22325	27940	Fatty acid
M118T277	5372.05	5274.39	2989.56	3016.72	933.893	2742.54	3054.22	4224.64	782.942	767.227	1372.68	2410.06	2578.5	1966.65	5373.32	2850.99	1984.14	1844.54	2153.33	1197.18	Fatty acid
M139T21	16954	11764.8	13699.9	13167.3	12548.3	10025.3	11331.7	12221.8	14270.7	15966.1	4388.31	5444.6	12392.5	36427.9	12020.3	10983.3	11496.2	29588.3	13656.5	15261.9	Fatty acid
M189T109	27401.9	19989.1	22565.6	19036	22143.9	21124.1	20543.8	21743.3	26970.7	21239.9	121465	156247	86258.7	161527	86101.5	168414	94789.2	188166	97582.2	171193	Fatty acid
M189T109	27401.9	19989.1	22565.6	19036	22143.9	21124.1	20543.8	21743.3	26970.7	21239.9	121465	156247	86258.7	161527	86101.5	168414	94789.2	188166	97582.2	171193	Fatty acid
M225T111	5750.63	23612.3	6358.32	20665.3	5791.51	19537.3	19441.6	18773.9	5711.68	19429	9998.6	10531.9	9188.43	10369.2	8717.11	9852.62	10931.2	9920.05	10382.2	9144.57	Fatty acid
M225T111	5750.63	23612.3	6358.32	20665.3	5791.51	19537.3	19441.6	18773.9	5711.68	19429	9998.6	10531.9	9188.43	10369.2	8717.11	9852.62	10931.2	9920.05	10382.2	9144.57	Fatty acid
M293T62	47690	49100.7	85099.6	80863.6	72019.3	48961.7	71701.6	57249.2	91883.9	87547.7	14316.3	14543.4	28154.6	14094	28546.8	10277.6	26217.5	16278.4	18022.3	11138.1	Fatty acid
M315T175	1327.25	1080.01	9662.78	13282.6	9825.11	8519.39	11298.4	19240.9	7681.67	9342.68	15147.2	20548.9	46931.9	51926.8	13940.6	19129.4	10831.6	11177.6	43179.8	16573.8	Fatty acid
M315T138	6807.64	5863.55	6258.13	5582.02	6055.69	6352.05	5718.48	6315.58	6518.74	5700.92	23820.9	32290.3	27040.6	29600.4	22406.1	27744.1	21763.2	33265.3	22325	27940	Fatty acid
M301T236	6314.15	3222.66	4195.97	5699.23	6269.77	4470.31	3396.13	4686.68	8216.94	4766.37	10467.7	13526.5	9323.25	22625.7	8677.86	14101.2	9625.35	15062.8	11146.6	13475.8	Fatty acid
M301T203	3195.69	2768.88	1847.97	1619.18	2139.11	2282.96	1979.52	2583.64	1851.5	2588.75	3591.67	5349.22	3690.85	5179.23	3992.54	5146.17	4106.87	5316.76	4508.38	5640.33	Fatty acid
M301T172	7706.19	6131.44	6810.61	7016.04	6045.24	6573.53	7208.34	7063.28	3898.51	7631.86	13635.5	16551.1	14187.2	15129.6	13222.6	7668.94	13178.5	16939.3	12392.1	11344.7	Fatty acid
M301T149	24571.3	48550.3	12490.1	31633.6	10616.1	35649.9	29928.1	33388.2	11049.8	40810.6	13413.3	24146.2	13645.6	11064.1	12705.6	20390.5	8986.83	19770.8	14040.4	11111.6	Fatty acid
M271T134	7056.67	5316.49	6224.79	5936.28	5449.2	5862.92	5705.22	5906.2	5995.84	5708.51	6103.88	9554.8	6330.51	9101.82	6600.27	8620.53	13734.2	8507.21	7016.29	8177.78	Fatty acid
M287T382	4108.12	2660.23	4120.91	2776.07	3626.48	3236.3	2640.18	3234.24	3779.77	3262.56	12658.4	17996.8	13180.8	19976.5	15140.1	21772.9	14307.4	20845.8	14373.4	20596	Fatty acid
M287T174	5315.18	4370.08	4545.13	2286.96	4174.82	4295.23	2105.43	5267.24	4376.69	2927.85	12768.7	16897	14830.2	17163.3	13372.9	16010.2	23722.8	16784.7	1240.44	3061.07	Fatty acid
M293T62	47690	49100.7	85099.6	80863.6	72019.3	48961.7	71701.6	57249.2	91883.9	87547.7	14316.3	14543.4	28154.6	14094	28546.8	10277.6	26217.5	16278.4	18022.3	11138.1	Fatty acid
M315T175	1327.25	1080.01	9662.78	13282.6	9825.11	8519.39	11298.4	19240.9	7681.67	9342.68	15147.2	20548.9	46931.9	51926.8	13940.6	19129.4	10831.6	11177.6	43179.8	16573.8	Fatty acid
M315T138	6807.64	5863.55	6258.13	5582.02	6055.69	6352.05	5718.48	6315.58	6518.74	5700.92	23820.9	32290.3	27040.6	29600.4	22406.1	27744.1	21763.2	33265.3	22325	27940	Fatty acid
M317T175	8553.38	23502.1	7519.23	7415.42	7261.19	6936.1	7432.09	7496.38	9304.52	9733.77	18283.4	17745.1	20306.6	32398.6	19921.1	30485	9398.65	16863.9	14502.6	18859.9	Fatty acid
M317T175	8553.38	23502.1	7519.23	7415.42	7261.19	6936.1	7432.09	7496.38	9304.52	9733.77	18283.4	17745.1	20306.6	32398.6	19921.1	30485	9398.65	16863.9	14502.6	18859.9	Fatty acid
M317T175	8553.38	23502.1	7519.23	7415.42	7261.19	6936.1	7432.09	7496.38	9304.52	9733.77	18283.4	17745.1	20306.6	32398.6	19921.1	30485	9398.65	16863.9	14502.6	18859.9	Fatty acid
M317T175	8553.38	23502.1	7519.23	7415.42	7261.19	6936.1	7432.09	7496.38	9304.52	9733.77	18283.4	17745.1	20306.6	32398.6	19921.1	30485	9398.65	16863.9	14502.6	18859.9	Fatty acid
M317T128	2736.47	3340.18	2460.01	3483.33	2265.41	3123.99	2953.48	2763.11	2265.8	3494.31	4406.39	6962.3	5003.38	6435.65	4476.27	5548.03	4629.25	6241.93	4366.62	6019.81	Fatty acid
M317T128	2736.47	3340.18	2460.01	3483.33	2265.41	3123.99	2953.48	2763.11	2265.8	3494.31	4406.39	6962.3	5003.38	6435.65	4476.27	5548.03	4629.25	6241.93	4366.62	6019.81	Fatty acid
M317T128	2736.47	3340.18	2460.01	3483.33	2265.41	3123.99	2953.48	2763.11	2265.8	3494.31	4406.39	6962.3	5003.38	6435.65	4476.27	5548.03	4629.25	6241.93	4366.62	6019.81	Fatty acid
M317T128	2736.47	3340.18	2460.01	3483.33	2265.41	3123.99	2953.48	2763.11	2265.8	3494.31	4406.39	6962.3	5003.38	6435.65	4476.27	5548.03	4629.25	6241.93	4366.62	6019.81	Fatty acid
M333T44	23266.4	26829.6	25077.2	25220	22672.3	30998.1	28830	32710.3	21464.2	29913.5	26195.1	18213.2	15411.3	22549.5	32237.1	24082.7	17673.8	28505.5	28472.8	26486.5	Fatty acid
M983T148	549.493	426.159	627.529	394.943	375.471	531.863	512.151	514.6	374.161	390.691	1025.83	1457.35	1556.55	1170.74	1513.7	1010.11	1775.76	1386.28	1669.79	1071.6	Fatty acid
M289T49	6185.27	6745.05	5578.29	7073.34	5622.56	6380.13	6527.6	6227.09	7145.3	6014.87	1779.15	12676.4	1233.04	14693.1	1834.22	13300.3	10914.5	11039.3	1424.73	11583	Flavonoid
M289T48	5405.16	6452.3	5404.58	6871.2	4956.52	6046.8	6312.6	5744.28	6566.74	5894.72	7586.83	2435.71	10736.6	11412.7	8166.29	10684.5	8533.87	8732.69	5084.75	758.442	Flavonoid
M271T69	38451.4	56152.2	22395.8	25267.9	18969	33675.6	38862.6	28196.9	58751.6	22260.1	329313	87505.9	282783	270225	179693	92853.5	154982	188814	109795	122843	Flavonoid
M271T190	5191.19	4053.93	4629.23	4826.8	6018.86	4980.3	4891.76	6653.08	4632.7	4672.96	11591.5	10063.5	12286.8	10655.5	12189.5	11441	12690.8	11814.9	11106.5	12660.3	Flavonoid
M271T172	9071.08	19948.2	7357.12	7954.08	10539.2	7934.67	9051.94	7462.41	19261.5	19290.2	40436.9	45733	29991.3	22928.7	33806.9	47125.9	30470.9	24655	38924.1	25981.3	Flavonoid
M287T389	2854.21	2591.2	2054.09	2242.25	1993.12	2930.23	2548.88	2878.56	2934.22	2395.83	1739.09	3218.94	2029.99	2802.44	2178.7	3060.97	2194.26	3437.34	3281.76	2494.07	Flavonoid
M288T64	11276.2	10396.1	12609.5	11390.2	819.053	11972.3	12369.6	10500.7	11417.1	10898.9	1980.46	35150.8	32290.1	29599.9	29831.5	27786.3	2430.12	21136.2	4381.23	25051.4	Flavonoid
M289T252	2055.36	5616.69	4548.31	4063.33	5098.15	4333.36	4015.23	5055.73	3007.17	3342.5	11358.7	2582.77	3623.04	2019.94	2852.45	2872.24	3848.99	3619.69	1554.14	8011.28	Flavonoid
M309T389	3713.53	3518.02	4435.75	3679.96	3371.77	3531.66	3718.14	3945.19	2837.57	2956.36	2555.9	1604.98	3289.18	1717.45	3727.13	1920.28	3084.17	1689.67	2720.2	2128.07	Flavonoid
M325T389	4637.62	5435.66	5422.39	6101.92	4596.62	5647	5805.13	5027.34	4441.5	4993.02	6887.77	4896.72	6979.12	5041.92	6541.19	5611.21	6370.36	4848.94	6542.55	5174.07	Flavonoid
M433T247	11528	16104	11865.2	12868.2	12236.3	7995.62	12731.9	12976.5	13147.5	8305.77	5909.36	4325.29	6874.29	4326.81	5596.54	4200.95	6395.71	4158.3	4794.97	3991.3	Flavonoid
M273T190	12472.2	17077.3	11612.3	11042.4	16030.1	12386.4	20862.6	21211.1	14106	12278.7	7277.34	3348.67	5747.38	8815.35	8220.12	8559.86	9044.61	12878.6	16112	13857.1	Flavonoid
M273T44	13226.8	19338.8	16738.9	18932.3	15616.7	16524.4	26838.2	14387.5	18319	17925.6	87591.2	53523.5	72114.2	56173.7	70976.4	62320.2	64130.6	51924.1	60771	60098	Flavonoid
M273T65	29281.9	37294.3	33918.3	19796.5	21327.5	41684.2	40704.8	40597.8	29631.4	12721.7	72615.7	79278.8	72154.1	60446.2	28555.4	37675.7	78773.2	79463.8	75064.5	45794.3	Flavonoid
M287T176	29497.1	20203.8	21591.4	28056.3	24063.9	29767.5	30707.7	34355.4	23537.3	30738.1	935.65	20440.8	27521.8	18796.3	25392.7	1623.64	27995.7	21728.4	472.825	22107.6	Flavonoid
M287T285	3772.8	3801.61	3528.79	3940.6	3835.38	5449.19	4275.91	4506.52	4359.53	4048.96	3045.56	1099.39	2890.68	3212.29	3279.19	3494.73	2731.35	3444.9	2509.09	2866.12	Flavonoid
M287T247	2147.17	2416.97	2665.3	2788.51	2434.95	1911.12	2826.95	2466.06	2707.48	2044.97	4133.73	2144.18	4922.23	4366.54	4731.1	2309.2	4638.55	4068.44	4617.25	1728	Flavonoid
M287T389	2854.21	2591.2	2054.09	2242.25	1993.12	2930.23	2548.88	2878.56	2934.22	2395.83	1739.09	3218.94	2029.99	2802.44	2178.7	3060.97	2194.26	3437.34	3281.76	2494.07	Flavonoid
M287T389	2854.21	2591.2	2054.09	2242.25	1993.12	2930.23	2548.88	2878.56	2934.22	2395.83	1739.09	3218.94	2029.99	2802.44	2178.7	3060.97	2194.26	3437.34	3281.76	2494.07	Flavonoid
M288T64	11276.2	10396.1	12609.5	11390.2	819.053	11972.3	12369.6	10500.7	11417.1	10898.9	1980.46	35150.8	32290.1	29599.9	29831.5	27786.3	2430.12	21136.2	4381.23	25051.4	Flavonoid
M290T45	5224.02	9888.77	6361.34	8206.1	4913.5	8694.65	8852.12	8442.23	6506.19	8749.56	5229.9	8136.54	1479.2	3993.38	6056.08	7838.85	7267.96	8689.17	7431.41	7420.05	Flavonoid
M309T389	3713.53	3518.02	4435.75	3679.96	3371.77	3531.66	3718.14	3945.19	2837.57	2956.36	2555.9	1604.98	3289.18	1717.45	3727.13	1920.28	3084.17	1689.67	2720.2	2128.07	Flavonoid
M309T389	3713.53	3518.02	4435.75	3679.96	3371.77	3531.66	3718.14	3945.19	2837.57	2956.36	2555.9	1604.98	3289.18	1717.45	3727.13	1920.28	3084.17	1689.67	2720.2	2128.07	Flavonoid
M325T389	4637.62	5435.66	5422.39	6101.92	4596.62	5647	5805.13	5027.34	4441.5	4993.02	6887.77	4896.72	6979.12	5041.92	6541.19	5611.21	6370.36	4848.94	6542.55	5174.07	Flavonoid
M325T389	4637.62	5435.66	5422.39	6101.92	4596.62	5647	5805.13	5027.34	4441.5	4993.02	6887.77	4896.72	6979.12	5041.92	6541.19	5611.21	6370.36	4848.94	6542.55	5174.07	Flavonoid
M341T123	343251	289738	105724	255865	204690	283568	157892	186462	218752	287633	62736.6	60029.4	82126.5	39473.5	86104	69687.9	28438.7	69460.8	113140	23664.5	Flavonoid
M341T123	343251	289738	105724	255865	204690	283568	157892	186462	218752	287633	62736.6	60029.4	82126.5	39473.5	86104	69687.9	28438.7	69460.8	113140	23664.5	Flavonoid
M341T191	18412.1	41830.3	41584.4	39614.6	16378	42719.5	41291.5	76071.4	17085.3	14826.4	25471.6	31919.5	28943.1	35772.6	54680.4	35085.8	56830.5	21241	57522	60114.3	Flavonoid
M341T191	18412.1	41830.3	41584.4	39614.6	16378	42719.5	41291.5	76071.4	17085.3	14826.4	25471.6	31919.5	28943.1	35772.6	54680.4	35085.8	56830.5	21241	57522	60114.3	Flavonoid
M341T250	21171.4	21974.7	36099.7	20157.2	36867.2	24401.3	22678	14148.3	13806.6	24406	3472.83	7623.92	6648.61	8834.71	4712.01	8088.67	9514.28	5174.91	7350.24	8145.07	Flavonoid
M341T250	21171.4	21974.7	36099.7	20157.2	36867.2	24401.3	22678	14148.3	13806.6	24406	3472.83	7623.92	6648.61	8834.71	4712.01	8088.67	9514.28	5174.91	7350.24	8145.07	Flavonoid
M361T252	16310.8	15325.9	12680.8	10777.4	17742.6	5296	6313.36	17380.2	26020.4	5175.96	4351.46	3848.48	4591.68	5312.66	6169	2281.35	8425.8	2416.25	7867.83	6550.8	Flavonoid
M361T252	16310.8	15325.9	12680.8	10777.4	17742.6	5296	6313.36	17380.2	26020.4	5175.96	4351.46	3848.48	4591.68	5312.66	6169	2281.35	8425.8	2416.25	7867.83	6550.8	Flavonoid
M361T252	16310.8	15325.9	12680.8	10777.4	17742.6	5296	6313.36	17380.2	26020.4	5175.96	4351.46	3848.48	4591.68	5312.66	6169	2281.35	8425.8	2416.25	7867.83	6550.8	Flavonoid
M363T306	96906.7	199686	155266	175923	121847	165291	184530	144192	94447.6	126525	9079.7	12773.7	5993.33	3442.71	6877.08	6232.48	9620.97	6402.81	5526.31	9301.42	Flavonoid
M363T306	96906.7	199686	155266	175923	121847	165291	184530	144192	94447.6	126525	9079.7	12773.7	5993.33	3442.71	6877.08	6232.48	9620.97	6402.81	5526.31	9301.42	Flavonoid
M379T248	4025.44	5483.79	5725.93	4542.1	4936.63	4960.78	4482.21	4872.55	4201.09	3601.28	2626.46	1494.54	6564.92	2359.14	6689.05	4887.22	3620.35	2291.19	5412.75	4142.92	Flavonoid
M379T248	4025.44	5483.79	5725.93	4542.1	4936.63	4960.78	4482.21	4872.55	4201.09	3601.28	2626.46	1494.54	6564.92	2359.14	6689.05	4887.22	3620.35	2291.19	5412.75	4142.92	Flavonoid
M379T304_1	61594.3	15154.5	4822.29	11109.3	7712.81	12545.6	12437	7759.8	4534.76	7732.33	7337.97	8319.29	6669.87	8795.9	9221.07	9438.04	10109.2	8705.23	6152.05	8749.35	Flavonoid
M379T304_1	61594.3	15154.5	4822.29	11109.3	7712.81	12545.6	12437	7759.8	4534.76	7732.33	7337.97	8319.29	6669.87	8795.9	9221.07	9438.04	10109.2	8705.23	6152.05	8749.35	Flavonoid
M433T169	917.964	5578.55	4464.83	5004.98	5040.71	5181.45	4929.1	6240.48	4620.93	5342.4	6854.9	6469.38	1075.56	5701.09	7025.82	5769.72	5838.43	4533.39	7327.69	6061.31	Flavonoid
M433T128	32424.7	8060.33	28115.7	35545.4	43518.3	33004.3	22251.3	35604.9	53123.1	15316.6	62991.5	31782.9	69459.1	40736.6	62921	38471.2	72146.2	38333.7	62326.6	35848.9	Flavonoid
M450T133	2969.85	3342.71	3563.92	3284.27	3060.23	3241.18	2968.66	3119.73	3111.64	2656.25	3634.6	6294.61	4034.67	6278.4	3725.93	5429.9	3887.73	4644.99	3137.24	4678.89	Flavonoid
M519T188_1	4489.52	2300.95	1984.62	5779.75	3666.54	5563.76	4777.15	2333.94	4896.56	2681.86	5235.99	5913.15	5401.04	5682.36	5596.06	5448.29	5105.89	5914.79	4929.31	5235.73	Flavonoid
M536T199	5282.18	1439.51	5944.02	5859.11	6432.94	6172.51	5079.42	9945.18	4541.52	4959.9	2778.14	2273.06	2869.38	2547.33	3038.41	2256.49	3028.72	2250.81	2829.95	2212.32	Flavonoid
M541T290	424.784	1012.49	1096.15	627.726	1309.77	607.525	598.202	909.801	930.018	481.886	3394.03	2837.64	5034.32	1592.78	3967.97	2343.21	2935.17	2108.25	3805.91	1597.71	Flavonoid
M541T494	2452.04	4963.37	4563.56	5681.28	3525.85	4816.73	3733.11	5577.58	2945.2	3612.98	6562.53	12237.9	9468.81	13861.4	9013.75	11952.4	9072.83	10181.3	6407.8	8521.56	Flavonoid
M557T494	529.204	770.564	910.17	933.064	475.024	632.641	536.056	767.982	539.507	685.13	1172.41	1717.83	1424.89	1550.73	1255.87	1744.42	1565.53	1584.3	1225.55	1390.23	Flavonoid
M433T169	917.964	5578.55	4464.83	5004.98	5040.71	5181.45	4929.1	6240.48	4620.93	5342.4	6854.9	6469.38	1075.56	5701.09	7025.82	5769.72	5838.43	4533.39	7327.69	6061.31	Flavonoid
M288T64	11276.2	10396.1	12609.5	11390.2	819.053	11972.3	12369.6	10500.7	11417.1	10898.9	1980.46	35150.8	32290.1	29599.9	29831.5	27786.3	2430.12	21136.2	4381.23	25051.4	Flavonoid
M289T49	6185.27	6745.05	5578.29	7073.34	5622.56	6380.13	6527.6	6227.09	7145.3	6014.87	1779.15	12676.4	1233.04	14693.1	1834.22	13300.3	10914.5	11039.3	1424.73	11583	Flavonoid
M271T69	38451.4	56152.2	22395.8	25267.9	18969	33675.6	38862.6	28196.9	58751.6	22260.1	329313	87505.9	282783	270225	179693	92853.5	154982	188814	109795	122843	Flavonoid
M271T190	5191.19	4053.93	4629.23	4826.8	6018.86	4980.3	4891.76	6653.08	4632.7	4672.96	11591.5	10063.5	12286.8	10655.5	12189.5	11441	12690.8	11814.9	11106.5	12660.3	Flavonoid
M271T172	9071.08	19948.2	7357.12	7954.08	10539.2	7934.67	9051.94	7462.41	19261.5	19290.2	40436.9	45733	29991.3	22928.7	33806.9	47125.9	30470.9	24655	38924.1	25981.3	Flavonoid
M288T64	11276.2	10396.1	12609.5	11390.2	819.053	11972.3	12369.6	10500.7	11417.1	10898.9	1980.46	35150.8	32290.1	29599.9	29831.5	27786.3	2430.12	21136.2	4381.23	25051.4	Flavonoid
M289T49	6185.27	6745.05	5578.29	7073.34	5622.56	6380.13	6527.6	6227.09	7145.3	6014.87	1779.15	12676.4	1233.04	14693.1	1834.22	13300.3	10914.5	11039.3	1424.73	11583	Flavonoid
M289T49	6185.27	6745.05	5578.29	7073.34	5622.56	6380.13	6527.6	6227.09	7145.3	6014.87	1779.15	12676.4	1233.04	14693.1	1834.22	13300.3	10914.5	11039.3	1424.73	11583	Flavonoid
M303T429	7112.47	23496.5	5300.86	7243.7	7374.25	6869.11	11155.8	7861.35	7337.78	17317.6	4340.92	4033.25	2105.4	4889.03	1839.55	5184.89	2491.17	2561.98	2405.01	4575.32	Flavonoid
M341T123	343251	289738	105724	255865	204690	283568	157892	186462	218752	287633	62736.6	60029.4	82126.5	39473.5	86104	69687.9	28438.7	69460.8	113140	23664.5	Flavonoid
M341T191	18412.1	41830.3	41584.4	39614.6	16378	42719.5	41291.5	76071.4	17085.3	14826.4	25471.6	31919.5	28943.1	35772.6	54680.4	35085.8	56830.5	21241	57522	60114.3	Flavonoid
M341T250	21171.4	21974.7	36099.7	20157.2	36867.2	24401.3	22678	14148.3	13806.6	24406	3472.83	7623.92	6648.61	8834.71	4712.01	8088.67	9514.28	5174.91	7350.24	8145.07	Flavonoid
M363T306	96906.7	199686	155266	175923	121847	165291	184530	144192	94447.6	126525	9079.7	12773.7	5993.33	3442.71	6877.08	6232.48	9620.97	6402.81	5526.31	9301.42	Flavonoid
M379T248	4025.44	5483.79	5725.93	4542.1	4936.63	4960.78	4482.21	4872.55	4201.09	3601.28	2626.46	1494.54	6564.92	2359.14	6689.05	4887.22	3620.35	2291.19	5412.75	4142.92	Flavonoid
M379T304_1	61594.3	15154.5	4822.29	11109.3	7712.81	12545.6	12437	7759.8	4534.76	7732.33	7337.97	8319.29	6669.87	8795.9	9221.07	9438.04	10109.2	8705.23	6152.05	8749.35	Flavonoid
M449T247	5014.18	4620.21	3878.35	3860.29	5165.17	4948.15	4830.14	5326.51	6675.95	5235.95	4951.53	8433.54	5790.57	3643.05	5858.43	3443.18	6464.59	10808	4430.21	3552.39	Flavonoid
M449T178	2509.21	2808.09	3367.98	2532.48	2761.92	2568.82	2412.95	2177.14	2913.95	2551.41	4451.88	3467.6	5120.61	4998.27	4251.37	4916.54	4137.3	4219.7	1205.11	3918.55	Flavonoid
M457T425	14872.8	14989.9	14193.5	13537.8	13011.5	12498.5	14827.6	11195	8807.85	12137	9080.35	10208.7	13266.8	8613.4	11234.9	8616.17	8722	8730.07	9125.08	8920.63	Flavonoid
M457T425	14872.8	14989.9	14193.5	13537.8	13011.5	12498.5	14827.6	11195	8807.85	12137	9080.35	10208.7	13266.8	8613.4	11234.9	8616.17	8722	8730.07	9125.08	8920.63	Flavonoid
M457T425	14872.8	14989.9	14193.5	13537.8	13011.5	12498.5	14827.6	11195	8807.85	12137	9080.35	10208.7	13266.8	8613.4	11234.9	8616.17	8722	8730.07	9125.08	8920.63	Flavonoid
M457T425	14872.8	14989.9	14193.5	13537.8	13011.5	12498.5	14827.6	11195	8807.85	12137	9080.35	10208.7	13266.8	8613.4	11234.9	8616.17	8722	8730.07	9125.08	8920.63	Flavonoid
M466T350	1522.53	1643.52	1734.05	1411.72	1523.12	956.971	1560.83	1333.36	1520.52	1571.08	4345.84	8705.1	6963.82	5343.19	4689.92	7825.54	4804.39	8130.57	3408.25	4536.41	Flavonoid
M471T178	9425.24	14912.5	11625	13615.3	11025.4	13396	13918.7	12970	8571.75	11695.3	23255.7	18302.2	26709.5	22204	25840.2	16808.4	23582.9	18696.9	31592.4	18685.7	Flavonoid
M581T183	10760.8	10877.8	6615.82	12063.4	7753.7	7550.02	8385.34	8971.99	6242.37	10475.3	11600.9	15287.4	13446.1	10047.2	6333.18	10598.7	13210.7	12560.2	11154.9	12222.7	Flavonoid
M619T248	4595.61	4743.83	4533.72	4961.63	4395.66	3433.99	3646.51	3841.32	4453.54	3182.18	4233.47	4247.4	5307	4479	5252.65	3808.19	4074.15	3249.35	4199.16	3448.32	Flavonoid
M628T42	1893.09	3186.95	3446.57	2583.48	3552.86	1560.41	2753.31	3071.92	4193.44	2360.35	8920.69	17144.3	11913.1	16828.4	8319.88	15326.1	9109.6	8852.87	12225	14826.1	Flavonoid
M287T176	29497.1	20203.8	21591.4	28056.3	24063.9	29767.5	30707.7	34355.4	23537.3	30738.1	935.65	20440.8	27521.8	18796.3	25392.7	1623.64	27995.7	21728.4	472.825	22107.6	Flavonoid
M287T285	3772.8	3801.61	3528.79	3940.6	3835.38	5449.19	4275.91	4506.52	4359.53	4048.96	3045.56	1099.39	2890.68	3212.29	3279.19	3494.73	2731.35	3444.9	2509.09	2866.12	Flavonoid
M287T247	2147.17	2416.97	2665.3	2788.51	2434.95	1911.12	2826.95	2466.06	2707.48	2044.97	4133.73	2144.18	4922.23	4366.54	4731.1	2309.2	4638.55	4068.44	4617.25	1728	Flavonoid
M633T500	18572.2	14159.9	26750.1	28992.4	9222.05	23313.3	4510.07	15459.3	7708.53	13663.9	3103.6	5407.99	3937.82	3038.24	3056.77	8298.72	4989.24	4762.03	4717.96	3339.55	Flavonoid
M633T414	1748.94	4868.15	2918.37	4426.19	3943.46	4044.46	4770.36	2432.11	1499.36	4338.53	1747.45	2653.68	547.147	1689.46	2491.28	2618.49	1908.35	1941.41	2111.1	2219.69	Flavonoid
M649T411	665.057	2918.32	1423.33	1115.73	2299.36	1987.38	720.405	696.003	1902.07	967.419	2047.75	2202.7	2296.34	1373.5	1145.28	2319.52	1542.75	1179.22	1795.27	1421.02	Flavonoid
M449T247	5014.18	4620.21	3878.35	3860.29	5165.17	4948.15	4830.14	5326.51	6675.95	5235.95	4951.53	8433.54	5790.57	3643.05	5858.43	3443.18	6464.59	10808	4430.21	3552.39	Flavonoid
M449T178	2509.21	2808.09	3367.98	2532.48	2761.92	2568.82	2412.95	2177.14	2913.95	2551.41	4451.88	3467.6	5120.61	4998.27	4251.37	4916.54	4137.3	4219.7	1205.11	3918.55	Flavonoid
M466T350	1522.53	1643.52	1734.05	1411.72	1523.12	956.971	1560.83	1333.36	1520.52	1571.08	4345.84	8705.1	6963.82	5343.19	4689.92	7825.54	4804.39	8130.57	3408.25	4536.41	Flavonoid
M471T178	9425.24	14912.5	11625	13615.3	11025.4	13396	13918.7	12970	8571.75	11695.3	23255.7	18302.2	26709.5	22204	25840.2	16808.4	23582.9	18696.9	31592.4	18685.7	Flavonoid
M333T399	877.184	978.126	876.759	984.056	880.984	848.654	798.645	975.498	894.873	1056.21	1469.11	399.314	1936.56	2019.9	406.013	1679.33	422.418	1910.75	1521.98	1891.8	Flavonoid
M350T342	1969.63	1082.32	1931	1778.29	994.525	2048.09	1996.18	1906.9	1749.68	1988.63	2730.1	3909.02	3981.86	2845.31	1979.86	3277	3935.82	3511.55	2532.92	2899.95	Flavonoid
M355T399	630.138	926.76	774.288	666.387	746.162	799.615	740.31	911.807	830.517	920.281	214.967	191.486	255.066	230.89	291.926	206.481	238.659	262.319	226.667	146.123	Flavonoid
M433T169	917.964	5578.55	4464.83	5004.98	5040.71	5181.45	4929.1	6240.48	4620.93	5342.4	6854.9	6469.38	1075.56	5701.09	7025.82	5769.72	5838.43	4533.39	7327.69	6061.31	Flavonoid
M433T169	917.964	5578.55	4464.83	5004.98	5040.71	5181.45	4929.1	6240.48	4620.93	5342.4	6854.9	6469.38	1075.56	5701.09	7025.82	5769.72	5838.43	4533.39	7327.69	6061.31	Flavonoid
M433T169	917.964	5578.55	4464.83	5004.98	5040.71	5181.45	4929.1	6240.48	4620.93	5342.4	6854.9	6469.38	1075.56	5701.09	7025.82	5769.72	5838.43	4533.39	7327.69	6061.31	Flavonoid
M449T247	5014.18	4620.21	3878.35	3860.29	5165.17	4948.15	4830.14	5326.51	6675.95	5235.95	4951.53	8433.54	5790.57	3643.05	5858.43	3443.18	6464.59	10808	4430.21	3552.39	Flavonoid
M449T247	5014.18	4620.21	3878.35	3860.29	5165.17	4948.15	4830.14	5326.51	6675.95	5235.95	4951.53	8433.54	5790.57	3643.05	5858.43	3443.18	6464.59	10808	4430.21	3552.39	Flavonoid
M449T247	5014.18	4620.21	3878.35	3860.29	5165.17	4948.15	4830.14	5326.51	6675.95	5235.95	4951.53	8433.54	5790.57	3643.05	5858.43	3443.18	6464.59	10808	4430.21	3552.39	Flavonoid
M449T178	2509.21	2808.09	3367.98	2532.48	2761.92	2568.82	2412.95	2177.14	2913.95	2551.41	4451.88	3467.6	5120.61	4998.27	4251.37	4916.54	4137.3	4219.7	1205.11	3918.55	Flavonoid
M449T178	2509.21	2808.09	3367.98	2532.48	2761.92	2568.82	2412.95	2177.14	2913.95	2551.41	4451.88	3467.6	5120.61	4998.27	4251.37	4916.54	4137.3	4219.7	1205.11	3918.55	Flavonoid
M449T178	2509.21	2808.09	3367.98	2532.48	2761.92	2568.82	2412.95	2177.14	2913.95	2551.41	4451.88	3467.6	5120.61	4998.27	4251.37	4916.54	4137.3	4219.7	1205.11	3918.55	Flavonoid
M463T247	2799.44	2909.79	3555.58	3452.64	3647.93	2582.67	3178.88	3091.77	3375.49	2520.67	49899.2	18882.4	28158	25854.2	42461.7	30099.9	53793	35778.6	49956.7	35924.9	Flavonoid
M466T350	1522.53	1643.52	1734.05	1411.72	1523.12	956.971	1560.83	1333.36	1520.52	1571.08	4345.84	8705.1	6963.82	5343.19	4689.92	7825.54	4804.39	8130.57	3408.25	4536.41	Flavonoid
M466T350	1522.53	1643.52	1734.05	1411.72	1523.12	956.971	1560.83	1333.36	1520.52	1571.08	4345.84	8705.1	6963.82	5343.19	4689.92	7825.54	4804.39	8130.57	3408.25	4536.41	Flavonoid
M466T350	1522.53	1643.52	1734.05	1411.72	1523.12	956.971	1560.83	1333.36	1520.52	1571.08	4345.84	8705.1	6963.82	5343.19	4689.92	7825.54	4804.39	8130.57	3408.25	4536.41	Flavonoid
M471T178	9425.24	14912.5	11625	13615.3	11025.4	13396	13918.7	12970	8571.75	11695.3	23255.7	18302.2	26709.5	22204	25840.2	16808.4	23582.9	18696.9	31592.4	18685.7	Flavonoid
M471T178	9425.24	14912.5	11625	13615.3	11025.4	13396	13918.7	12970	8571.75	11695.3	23255.7	18302.2	26709.5	22204	25840.2	16808.4	23582.9	18696.9	31592.4	18685.7	Flavonoid
M471T178	9425.24	14912.5	11625	13615.3	11025.4	13396	13918.7	12970	8571.75	11695.3	23255.7	18302.2	26709.5	22204	25840.2	16808.4	23582.9	18696.9	31592.4	18685.7	Flavonoid
M565T198	60494.9	80523	89230.9	79851.4	85282.8	78269.1	81749.2	74084.9	73307.4	59570.3	8925.12	10389.7	9973.87	8549.75	10324.2	7912.93	11042.4	7346.94	7271.15	10802.2	Flavonoid
M582T183	2432.29	5598.72	2640.66	3359.81	1058.6	3978.35	3816.49	1963.07	2960.84	2648.17	4388.48	5438.37	4514.43	1885.53	5266.9	3295.04	4521.28	3818.16	2626.63	3583.41	Flavonoid
M595T248	23385.1	49773.7	28689	46302.6	31735.2	14595.4	25166.7	35506.7	29037.4	14403.9	3372.89	6653.35	8287.86	1597.92	10799.5	7394.4	1885.83	6896.29	1252.79	2337.83	Flavonoid
M595T248	23385.1	49773.7	28689	46302.6	31735.2	14595.4	25166.7	35506.7	29037.4	14403.9	3372.89	6653.35	8287.86	1597.92	10799.5	7394.4	1885.83	6896.29	1252.79	2337.83	Flavonoid
M595T248	23385.1	49773.7	28689	46302.6	31735.2	14595.4	25166.7	35506.7	29037.4	14403.9	3372.89	6653.35	8287.86	1597.92	10799.5	7394.4	1885.83	6896.29	1252.79	2337.83	Flavonoid
M595T160	5365.45	4768.03	5450.22	4868.88	4815.83	4709.24	4952.31	5062.78	4760.78	4801.87	12266.1	8539.39	10439.1	9500.33	1954.78	9870.01	11621.3	9145.86	12052	10608.8	Flavonoid
M595T160	5365.45	4768.03	5450.22	4868.88	4815.83	4709.24	4952.31	5062.78	4760.78	4801.87	12266.1	8539.39	10439.1	9500.33	1954.78	9870.01	11621.3	9145.86	12052	10608.8	Flavonoid
M595T160	5365.45	4768.03	5450.22	4868.88	4815.83	4709.24	4952.31	5062.78	4760.78	4801.87	12266.1	8539.39	10439.1	9500.33	1954.78	9870.01	11621.3	9145.86	12052	10608.8	Flavonoid
M596T299	36421.7	37893.8	47963.4	37035.4	43637	34607.7	37618.4	37295.5	39614.8	34862.2	5439.34	2617.85	5756.12	2506.95	6595.93	933.592	7080.73	3629.93	5921.36	3811.71	Flavonoid
M596T299	36421.7	37893.8	47963.4	37035.4	43637	34607.7	37618.4	37295.5	39614.8	34862.2	5439.34	2617.85	5756.12	2506.95	6595.93	933.592	7080.73	3629.93	5921.36	3811.71	Flavonoid
M617T248	1769.41	1625.95	1162.51	1696.12	1901.43	1770.37	1494.04	1519.22	1648.65	1191.81	1511.55	2032.63	2007.51	1748.9	1854.99	1143.5	1041.08	1541.4	1785.76	1293.03	Flavonoid
M617T248	1769.41	1625.95	1162.51	1696.12	1901.43	1770.37	1494.04	1519.22	1648.65	1191.81	1511.55	2032.63	2007.51	1748.9	1854.99	1143.5	1041.08	1541.4	1785.76	1293.03	Flavonoid
M617T248	1769.41	1625.95	1162.51	1696.12	1901.43	1770.37	1494.04	1519.22	1648.65	1191.81	1511.55	2032.63	2007.51	1748.9	1854.99	1143.5	1041.08	1541.4	1785.76	1293.03	Flavonoid
M617T182	2923.71	3964.92	3560.58	2226.39	2154.53	3443.12	1356.11	3939.23	2934.49	3919.16	4819.59	10339.1	4803.16	7988.32	4689.44	4771.56	6178.32	4221.81	3058.84	4571.86	Flavonoid
M617T182	2923.71	3964.92	3560.58	2226.39	2154.53	3443.12	1356.11	3939.23	2934.49	3919.16	4819.59	10339.1	4803.16	7988.32	4689.44	4771.56	6178.32	4221.81	3058.84	4571.86	Flavonoid
M617T182	2923.71	3964.92	3560.58	2226.39	2154.53	3443.12	1356.11	3939.23	2934.49	3919.16	4819.59	10339.1	4803.16	7988.32	4689.44	4771.56	6178.32	4221.81	3058.84	4571.86	Flavonoid
M619T500	36570.2	65932.1	13499.3	5520.25	57328.9	17323.3	33511.5	24316.7	33647.9	20698.3	5219.23	7632.9	6827.56	8373.87	9068.75	8570.64	5395.04	8248.35	4944.13	13630.5	Flavonoid
M619T415	5080.04	5255.82	3843.68	6363.96	4852.2	5381.27	3557.21	7211.89	5376.01	687.995	1967.76	3074.78	2088.08	2020.8	2191.82	4547.16	2168.91	2925.77	1798.38	2706.29	Flavonoid
M633T500	18572.2	14159.9	26750.1	28992.4	9222.05	23313.3	4510.07	15459.3	7708.53	13663.9	3103.6	5407.99	3937.82	3038.24	3056.77	8298.72	4989.24	4762.03	4717.96	3339.55	Flavonoid
M633T500	18572.2	14159.9	26750.1	28992.4	9222.05	23313.3	4510.07	15459.3	7708.53	13663.9	3103.6	5407.99	3937.82	3038.24	3056.77	8298.72	4989.24	4762.03	4717.96	3339.55	Flavonoid
M633T500	18572.2	14159.9	26750.1	28992.4	9222.05	23313.3	4510.07	15459.3	7708.53	13663.9	3103.6	5407.99	3937.82	3038.24	3056.77	8298.72	4989.24	4762.03	4717.96	3339.55	Flavonoid
M633T414	1748.94	4868.15	2918.37	4426.19	3943.46	4044.46	4770.36	2432.11	1499.36	4338.53	1747.45	2653.68	547.147	1689.46	2491.28	2618.49	1908.35	1941.41	2111.1	2219.69	Flavonoid
M633T414	1748.94	4868.15	2918.37	4426.19	3943.46	4044.46	4770.36	2432.11	1499.36	4338.53	1747.45	2653.68	547.147	1689.46	2491.28	2618.49	1908.35	1941.41	2111.1	2219.69	Flavonoid
M633T414	1748.94	4868.15	2918.37	4426.19	3943.46	4044.46	4770.36	2432.11	1499.36	4338.53	1747.45	2653.68	547.147	1689.46	2491.28	2618.49	1908.35	1941.41	2111.1	2219.69	Flavonoid
M635T413	2074.69	4151.32	2064.17	3902.53	2269.11	1817.22	1323.93	4311.63	2438.26	3818.22	1674.45	2439.92	2045.05	1835.66	867.662	908.4	1143.94	1955.91	657.708	1871.9	Flavonoid
M635T489	3435.06	4889.57	2164.41	3784.07	2887.55	3228.72	3303.36	3126.16	2891.1	3403.44	869.789	1425.42	1850.66	552.611	856.482	1531.64	1142.82	1185.89	1298.39	1396.34	Flavonoid
M649T411	665.057	2918.32	1423.33	1115.73	2299.36	1987.38	720.405	696.003	1902.07	967.419	2047.75	2202.7	2296.34	1373.5	1145.28	2319.52	1542.75	1179.22	1795.27	1421.02	Flavonoid
M649T411	665.057	2918.32	1423.33	1115.73	2299.36	1987.38	720.405	696.003	1902.07	967.419	2047.75	2202.7	2296.34	1373.5	1145.28	2319.52	1542.75	1179.22	1795.27	1421.02	Flavonoid
M649T411	665.057	2918.32	1423.33	1115.73	2299.36	1987.38	720.405	696.003	1902.07	967.419	2047.75	2202.7	2296.34	1373.5	1145.28	2319.52	1542.75	1179.22	1795.27	1421.02	Flavonoid
M743T367	11355.5	15703	12287.2	7839.62	12423.8	8036.96	14046.6	4987.83	12339.9	13586.6	1635.35	1185.53	1565.1	1147.07	2665.21	1767.46	1726.34	1067.1	1523.29	1518.05	Flavonoid
M773T386	6072.3	5709.08	12534.1	5767.9	6959.98	4847.55	6479.06	4617.86	6809.5	5769.97	6530.21	1773	6505.78	2458.28	4641.6	2395.56	5403.45	2591.99	6365.91	3490.71	Flavonoid
M287T176	29497.1	20203.8	21591.4	28056.3	24063.9	29767.5	30707.7	34355.4	23537.3	30738.1	935.65	20440.8	27521.8	18796.3	25392.7	1623.64	27995.7	21728.4	472.825	22107.6	Flavonoid
M287T285	3772.8	3801.61	3528.79	3940.6	3835.38	5449.19	4275.91	4506.52	4359.53	4048.96	3045.56	1099.39	2890.68	3212.29	3279.19	3494.73	2731.35	3444.9	2509.09	2866.12	Flavonoid
M287T247	2147.17	2416.97	2665.3	2788.51	2434.95	1911.12	2826.95	2466.06	2707.48	2044.97	4133.73	2144.18	4922.23	4366.54	4731.1	2309.2	4638.55	4068.44	4617.25	1728	Flavonoid
M303T429	7112.47	23496.5	5300.86	7243.7	7374.25	6869.11	11155.8	7861.35	7337.78	17317.6	4340.92	4033.25	2105.4	4889.03	1839.55	5184.89	2491.17	2561.98	2405.01	4575.32	Flavonoid
M288T64	11276.2	10396.1	12609.5	11390.2	819.053	11972.3	12369.6	10500.7	11417.1	10898.9	1980.46	35150.8	32290.1	29599.9	29831.5	27786.3	2430.12	21136.2	4381.23	25051.4	Flavonoid
M289T49	6185.27	6745.05	5578.29	7073.34	5622.56	6380.13	6527.6	6227.09	7145.3	6014.87	1779.15	12676.4	1233.04	14693.1	1834.22	13300.3	10914.5	11039.3	1424.73	11583	Flavonoid
M289T49	6185.27	6745.05	5578.29	7073.34	5622.56	6380.13	6527.6	6227.09	7145.3	6014.87	1779.15	12676.4	1233.04	14693.1	1834.22	13300.3	10914.5	11039.3	1424.73	11583	Flavonoid
M305T302	6428.4	7069.12	6157.77	7637.34	7452.09	6241.17	2132.57	7669.42	8157.27	7856.41	7555.02	7817.74	8343.7	9416.67	8076.66	7429.14	8116.54	8932.07	7671.76	8313.43	Flavonoid
M310T298	4292.81	5314.58	3911.25	5350.59	3746.25	5601.88	5505.12	5973.91	4348.03	5564.59	3722.07	4082.87	3811.66	4731.12	3929.4	3993.6	3941.42	3932.07	4421.64	4122.16	Flavonoid
M450T344	945.601	925.571	2451.15	918.648	887.553	1410.4	840.924	3135.8	1282.02	552.842	35822.8	44129.9	40179.2	44540.6	40807.9	43613.3	40137.1	44972.7	36143.6	40457.7	Flavonoid
M450T344	945.601	925.571	2451.15	918.648	887.553	1410.4	840.924	3135.8	1282.02	552.842	35822.8	44129.9	40179.2	44540.6	40807.9	43613.3	40137.1	44972.7	36143.6	40457.7	Flavonoid
M464T345	2676.45	1235.15	1408.82	1597.48	1583.5	1323.55	1313.43	1319.64	1575.8	1096.83	1425.25	1148.81	1195.85	1049.5	1192.38	1048.64	1118.03	1000.4	1124.54	952.553	Flavonoid
M566T199	16525.7	22235.7	23667.6	21461.4	21118.3	22477.8	20330.9	21702.6	18938.4	17263	2564.7	3554.09	3469.36	3274.95	3422.03	2892.52	3396.42	2667.31	2564.43	2703.71	Flavonoid
M580T392	850.539	1311.4	1507.83	1246.13	904.926	1279.89	1485.47	1594.3	1312.1	1246.26	3000.59	1093.91	2101.29	1840.08	2429.61	1375.34	1477.22	1722.76	2669.95	825.468	Flavonoid
M580T183	13144	21255.7	14975.4	22835.8	14062.5	17844.4	15313.3	16516.5	12956.6	16565.6	21598.7	28269.8	22749.6	16493.1	23479.8	22004.1	23213.7	24303.3	24846.4	23958.7	Flavonoid
M582T473	584.136	857.726	995.89	794.479	912.873	1038.22	578.046	997.919	694.02	726.586	494.861	501.716	381.811	598.541	536.376	539.665	426.816	397.132	574.378	493.67	Flavonoid
M599T400	975.052	1057.51	895.012	845.798	1054.17	859.134	728.55	873.922	1047.29	842.515	1387.13	1683.3	1574.28	1446.33	1462.99	1280.62	766.63	1482.7	1210.41	1345.43	Flavonoid
M613T346	1797.95	2704.9	1121.06	7960.58	3159.86	3884.94	4373.36	1769.69	2453.23	5458.72	2275.31	2567.62	2531.18	2411.01	2480.8	2487.8	2355.97	2395.87	2242.66	2212.14	Flavonoid
M613T346	1797.95	2704.9	1121.06	7960.58	3159.86	3884.94	4373.36	1769.69	2453.23	5458.72	2275.31	2567.62	2531.18	2411.01	2480.8	2487.8	2355.97	2395.87	2242.66	2212.14	Flavonoid
M613T346	1797.95	2704.9	1121.06	7960.58	3159.86	3884.94	4373.36	1769.69	2453.23	5458.72	2275.31	2567.62	2531.18	2411.01	2480.8	2487.8	2355.97	2395.87	2242.66	2212.14	Flavonoid
M613T346	1797.95	2704.9	1121.06	7960.58	3159.86	3884.94	4373.36	1769.69	2453.23	5458.72	2275.31	2567.62	2531.18	2411.01	2480.8	2487.8	2355.97	2395.87	2242.66	2212.14	Flavonoid
M615T387	1940.23	2009.77	2400.08	2149.5	2207.04	2231.41	2112.45	2372.43	2154.92	2002.55	6855.6	6131.64	6936	6045.1	6831.16	5684.83	7184.32	5430.81	6999.67	5626.37	Flavonoid
M629T366	2127.01	1564.68	2177.29	1810.65	2026.4	1933.21	1916.42	1753.26	1988.37	2164.64	2443.42	2588.69	1333.46	2493.93	2417.85	2102.23	2386.93	2750.36	2357.61	2293.02	Flavonoid
M629T366	2127.01	1564.68	2177.29	1810.65	2026.4	1933.21	1916.42	1753.26	1988.37	2164.64	2443.42	2588.69	1333.46	2493.93	2417.85	2102.23	2386.93	2750.36	2357.61	2293.02	Flavonoid
M629T366	2127.01	1564.68	2177.29	1810.65	2026.4	1933.21	1916.42	1753.26	1988.37	2164.64	2443.42	2588.69	1333.46	2493.93	2417.85	2102.23	2386.93	2750.36	2357.61	2293.02	Flavonoid
M629T366	2127.01	1564.68	2177.29	1810.65	2026.4	1933.21	1916.42	1753.26	1988.37	2164.64	2443.42	2588.69	1333.46	2493.93	2417.85	2102.23	2386.93	2750.36	2357.61	2293.02	Flavonoid
M634T247	1214.04	1219.57	1139.89	1810.73	1085.15	720.256	643.454	1538.21	1695.05	638.71	904.98	717.413	1285.55	985.572	704.396	632.268	828.005	1066.83	1061.49	667.277	Flavonoid
M634T247	1214.04	1219.57	1139.89	1810.73	1085.15	720.256	643.454	1538.21	1695.05	638.71	904.98	717.413	1285.55	985.572	704.396	632.268	828.005	1066.83	1061.49	667.277	Flavonoid
M728T321	943.747	8437.69	6619.5	4624.07	8058.38	7741.13	9677.04	3164.73	5218.08	1961.51	866.6	957.016	1087.93	1007.01	995.683	1347.67	821.312	1044.32	778.336	1121.68	Flavonoid
M742T309	5235.95	11157.7	4620.85	9772.77	6196.11	8071.93	11941	13191.4	4984.13	12711.3	5645.88	4288.52	6351.53	1902.14	6726.69	4084.57	5340.19	4392.2	6380.51	3511.79	Flavonoid
M745T184	741.672	1313.29	1219.17	573.822	1176.09	1059.26	986.23	1045.51	768.889	834.124	1612.35	4194.58	2222.46	2063.68	1905.86	2474.01	1768.68	2587.31	1829.89	1541.12	Flavonoid
M758T352	31551.7	29086.7	24716.3	19872.7	25348.1	20153.4	19406	25520.4	22763.7	18367.2	2879.66	4142.08	4884.51	3101.83	5720.23	4669.96	4872.96	3427.37	5110.09	2959.59	Flavonoid
M759T190	8243.91	12435.3	11908.3	11626.4	9669.56	10538.9	9837.97	11062	8540.44	11626	7186.93	6861.61	8060.83	5995.12	8071.59	6676.94	7305.24	7801.12	7392.58	7810.18	Flavonoid
M775T215	13475.1	13550.8	8801.53	13020.5	10768.3	11464.6	14110.9	11299.5	9704.36	10525.3	7706.44	8969.83	10110.8	4362.63	9041.55	7362.59	7924.69	7033.61	8300.51	6607.02	Flavonoid
M204T309	3928.69	1539.95	3923.83	2202.03	3752.27	2125.13	1594.58	2517.42	4093.88	1297.22	3006.66	2501.04	2773.95	1898.66	2987.72	2394.76	2380.19	3199.8	2855.93	2514.76	Hormone
M336T381	1013.41	800.998	1952.6	940.92	1432.56	803.011	974.077	787.537	1219.84	904.522	1543.74	1730.26	1066.69	602.626	617.493	1752.31	1320.89	1676	1433	1783.72	Hormone
M352T300	2321.89	1692.31	2405.98	1578.79	1728.12	1451.72	2087.31	2332.04	3012.63	823.516	1386.36	948.936	1361.69	1480.89	1317.77	1334.95	1031.23	445.106	1304.77	1520.91	Hormone
M352T300	2321.89	1692.31	2405.98	1578.79	1728.12	1451.72	2087.31	2332.04	3012.63	823.516	1386.36	948.936	1361.69	1480.89	1317.77	1334.95	1031.23	445.106	1304.77	1520.91	Hormone
M352T300	2321.89	1692.31	2405.98	1578.79	1728.12	1451.72	2087.31	2332.04	3012.63	823.516	1386.36	948.936	1361.69	1480.89	1317.77	1334.95	1031.23	445.106	1304.77	1520.91	Hormone
M352T35	3619.02	1778.9	1034.52	3411.94	3414.05	3324.74	2651.61	4202.61	1897.2	3716.14	3107.07	3996.3	3573.61	3330.09	4288.23	1886.67	5779.89	5920.01	3672.18	6389.63	Hormone
M352T35	3619.02	1778.9	1034.52	3411.94	3414.05	3324.74	2651.61	4202.61	1897.2	3716.14	3107.07	3996.3	3573.61	3330.09	4288.23	1886.67	5779.89	5920.01	3672.18	6389.63	Hormone
M352T35	3619.02	1778.9	1034.52	3411.94	3414.05	3324.74	2651.61	4202.61	1897.2	3716.14	3107.07	3996.3	3573.61	3330.09	4288.23	1886.67	5779.89	5920.01	3672.18	6389.63	Hormone
M358T241	5713.27	5595.01	5185.32	3795.56	4487.09	5399.93	5387.86	7714.67	6541.05	6331.18	4491.01	3577.44	2984.48	5217.96	3584.43	3777.58	3559.04	1347.21	2614.68	2966.3	Hormone
M374T322	2413.23	4348.12	3537.12	1927.8	660.33	1955.08	2812.38	2366.82	2698.71	1922.79	2376.61	1398.73	1406.44	1846.35	1874.71	2321.94	1939.41	1960.76	2116.54	1759.36	Hormone
M374T322	2413.23	4348.12	3537.12	1927.8	660.33	1955.08	2812.38	2366.82	2698.71	1922.79	2376.61	1398.73	1406.44	1846.35	1874.71	2321.94	1939.41	1960.76	2116.54	1759.36	Hormone
M374T322	2413.23	4348.12	3537.12	1927.8	660.33	1955.08	2812.38	2366.82	2698.71	1922.79	2376.61	1398.73	1406.44	1846.35	1874.71	2321.94	1939.41	1960.76	2116.54	1759.36	Hormone
M376T434	2012.48	2798.4	3528.88	2807.13	2472.91	2680.7	2814.94	3156.52	2732.8	1762.88	5073.15	6512.11	6776.92	11628.2	6780.02	4879.65	12886.3	6554.21	4382.98	4111.08	Hormone
M414T432	1487.27	1088.96	1110.58	824.724	2395.48	669.949	1595.49	2375.27	1422.49	915.75	2372.63	2202.89	2181.53	1931.52	2131.85	1088.95	1808.05	1451.69	1525.21	2304.08	Hormone
M454T166	1819.49	1994.66	1916.09	715.624	707.872	2116.19	1840.05	1880.04	1800.63	1910.92	2426.22	2419.38	2605.11	2968.87	2164.56	2954.72	1384.56	1785.09	2068.87	1662.6	Hormone
M85T137	2244.01	2649.64	2090.74	1881.29	2178.26	2086.16	1867.93	1024.6	2167.97	1944.12	412.385	2529.59	1674.18	2430	2097.44	2438.87	2335.53	2377.69	2223.22	2030.58	Hormone
M222T33	4741.06	3650.18	4823.55	2945.37	3973	2817.75	2776.71	3102.07	5668.89	3527.37	4450.88	1265.37	4854.52	4804.09	5738.22	4744.29	4890.22	936.768	3996.37	1970.65	Hormone
M139T342	3016.19	528.87	2941	3599.2	1433.55	1906.2	1886.63	10439.8	1610.67	6821.98	413.673	344.478	404.026	235.086	300.652	339.336	499.199	447.759	358.836	218.692	Hormone
M139T197	1650.46	3330.12	780.491	2752.67	1141.72	3572.52	1682.83	1288.69	2366.79	2780.86	1528.71	1716.03	1257.02	1374.89	1814.73	1395.17	1997.77	2060.02	1693.69	1583.17	Hormone
M341T239	743.306	856.681	360.844	1138.77	294.926	803.448	1086.08	1311.38	1149.2	985.707	1656.96	1505.38	1409.21	1358.02	1759.53	1638.81	1540.96	1478.76	1914.39	1431.69	Hormone
M503T181	1767.45	2843.1	2131.44	2262.36	1793.24	3099.76	2420.56	2806.15	1722.41	2350.62	2572.24	5210.16	2775.43	5078.54	2948.3	4369.6	2983.75	4238.57	3016.84	4277.79	Hormone
M503T181	1767.45	2843.1	2131.44	2262.36	1793.24	3099.76	2420.56	2806.15	1722.41	2350.62	2572.24	5210.16	2775.43	5078.54	2948.3	4369.6	2983.75	4238.57	3016.84	4277.79	Hormone
M503T181	1767.45	2843.1	2131.44	2262.36	1793.24	3099.76	2420.56	2806.15	1722.41	2350.62	2572.24	5210.16	2775.43	5078.54	2948.3	4369.6	2983.75	4238.57	3016.84	4277.79	Hormone
M519T221	2683.81	2127.79	2470.19	2528.17	3400.87	2506.49	3002.14	2914.45	2395.65	3014.16	3070.64	2135.42	3753.89	3477.95	3491.64	3639.39	3311.75	3640.42	3028.27	2887.35	Hormone
M348T328	2591.1	2568.13	3002.99	3084.95	2967.31	2289.44	2410.23	2789.97	2843.4	1978.88	5059	4435.15	4761.94	4571.33	5059.14	4574.22	4556.52	4608.86	4691.61	3987.86	Hormone
M401T451	2534.19	2371.82	4845.93	3327.99	2487.66	248.76	3103.48	2125.6	3420.61	2454.7	19825.7	12282.1	26161.2	12333.6	21012.4	16791.6	22641.8	14047.2	20411.5	11257.5	Hormone
M422T151	1737.48	2067.73	2438.98	2719.88	2366.97	1990.22	1157.53	1864.69	2037.3	2146.76	2839.97	2064.86	2866.56	3025.64	3332.12	2488.84	2513.2	2611.07	1975.31	2395.3	Hormone
M454T166	1819.49	1994.66	1916.09	715.624	707.872	2116.19	1840.05	1880.04	1800.63	1910.92	2426.22	2419.38	2605.11	2968.87	2164.56	2954.72	1384.56	1785.09	2068.87	1662.6	Hormone
M456T181	6353.56	4083.97	4303.93	3491.73	6159.29	4463.26	3493.35	5015.72	5190.03	3980.47	3832.59	1095.9	3286.86	3848.32	4484.26	5338.76	3700.41	3731.36	1004.5	1677.96	Hormone
M317T175	8553.38	23502.1	7519.23	7415.42	7261.19	6936.1	7432.09	7496.38	9304.52	9733.77	18283.4	17745.1	20306.6	32398.6	19921.1	30485	9398.65	16863.9	14502.6	18859.9	Hormone
M317T128	2736.47	3340.18	2460.01	3483.33	2265.41	3123.99	2953.48	2763.11	2265.8	3494.31	4406.39	6962.3	5003.38	6435.65	4476.27	5548.03	4629.25	6241.93	4366.62	6019.81	Hormone
M220T273	2647.73	3255.89	1283.21	3512.02	3076.66	3247.7	3259.51	6082.72	2325.88	4666.68	13467.2	7679.17	14211.9	8135.79	13856.9	7676.23	13944.2	8666.51	14985.8	7032.99	Hormone
M220T61	9918.75	274298	213123	264736	296596	282092	80168.4	269504	122568	252625	90307.8	99719	136224	52967.7	125089	88984.5	122517	98336.9	47640.4	88695.6	Hormone
M242T271	443.907	969.752	921.524	816.665	1126.17	857.562	528.916	1316.58	1299.32	1222.1	3979.67	1141.59	1980.12	1276.82	2954.17	1585.78	3037.62	1833.72	3857.11	2827.49	Hormone
M242T426	21940.9	15331.9	16556.2	21344.7	18412.9	17102.3	22351.6	23814.6	18401	14329.8	14815.9	20671.6	14686.7	14844.3	19360.8	14930	15939.2	19294.4	14092.6	16354.6	Hormone
M247T327	2620.74	2750.03	1102.11	5334.94	2072.66	1980.27	3017.87	4806.1	2085.35	2744.69	4707.98	5879.53	3392.44	3917.35	5424.95	6889.47	3993.47	3727.34	5310.58	5990.54	Hormone
M265T327	4535.84	5440.57	4466.01	6138.86	4626.49	4997.27	5060.87	5128.95	4988.25	4834.07	7595.8	6174.82	5354.04	7289.49	6097.5	6834.73	6204.45	6261.12	6626.61	6808.15	Hormone
M287T153	13291.9	13331.3	13373.8	15688.7	12310.3	16002.6	12860.4	17585.5	12193.3	17338.1	324286	157968	216562	154241	228007	175593	304056	218877	141024	192784	Hormone
M287T182	77431.3	25683.6	18266.5	26165.2	83681.8	24232.7	24275	24744	21510.1	29122.2	26381.1	20365.4	63107.2	25252.8	25883.9	21891.9	27778.6	29854.7	25780.5	25481.8	Hormone
M287T43	90008.1	98581.4	88222.5	104569	79851.7	101837	102048	108144	94760	108997	650657	545556	655520	536944	688624	529524	686110	569089	693338	506799	Hormone
M519T221	2683.81	2127.79	2470.19	2528.17	3400.87	2506.49	3002.14	2914.45	2395.65	3014.16	3070.64	2135.42	3753.89	3477.95	3491.64	3639.39	3311.75	3640.42	3028.27	2887.35	Hormone
M233T171	4029.3	12422.3	13926.6	2463.79	4141.73	4665.29	2781.99	5058.38	14129	6235.24	8735.38	6055.3	8782.06	7740.81	6949.34	7215.97	8996.81	10103.3	7753.08	9161.91	Hormone
M249T347	4532.36	5452.01	2836.83	5779.17	3083.84	6523.11	5194.33	5385.6	4389.54	6379.74	5384.68	3542.16	5717.35	3343.04	5831.88	3879.35	5870.39	3531.95	5867.22	3291.68	Hormone
M220T273	2647.73	3255.89	1283.21	3512.02	3076.66	3247.7	3259.51	6082.72	2325.88	4666.68	13467.2	7679.17	14211.9	8135.79	13856.9	7676.23	13944.2	8666.51	14985.8	7032.99	Hormone
M220T61	9918.75	274298	213123	264736	296596	282092	80168.4	269504	122568	252625	90307.8	99719	136224	52967.7	125089	88984.5	122517	98336.9	47640.4	88695.6	Hormone
M242T271	443.907	969.752	921.524	816.665	1126.17	857.562	528.916	1316.58	1299.32	1222.1	3979.67	1141.59	1980.12	1276.82	2954.17	1585.78	3037.62	1833.72	3857.11	2827.49	Hormone
M242T426	21940.9	15331.9	16556.2	21344.7	18412.9	17102.3	22351.6	23814.6	18401	14329.8	14815.9	20671.6	14686.7	14844.3	19360.8	14930	15939.2	19294.4	14092.6	16354.6	Hormone
M371T258	572.644	652.204	724.911	554.452	340.963	811.705	541.447	539.38	658.054	491.975	995.507	1225.84	1843.35	1722.81	1832.41	1351.39	1848.54	923.744	1719.42	1776.11	Hormone
M215T557	1595.11	1968.81	1562.11	2108.9	2097.89	1943.44	1783.18	1940.91	1611.53	1981	359.831	2584.42	2482.22	1782.09	2538.67	2375.09	2787.37	1742.58	4143.33	2114.84	Hormone
M215T507	1860.78	6630.6	3289.73	7229.16	6768.02	12957.6	4966.1	8921.59	6317.95	8022.69	14606.3	11220	7837.15	5242.36	8108.38	4718.76	10178.8	8078.4	10575	6384.3	Hormone
M215T557	1595.11	1968.81	1562.11	2108.9	2097.89	1943.44	1783.18	1940.91	1611.53	1981	359.831	2584.42	2482.22	1782.09	2538.67	2375.09	2787.37	1742.58	4143.33	2114.84	Hormone
M215T507	1860.78	6630.6	3289.73	7229.16	6768.02	12957.6	4966.1	8921.59	6317.95	8022.69	14606.3	11220	7837.15	5242.36	8108.38	4718.76	10178.8	8078.4	10575	6384.3	Hormone
M136T309	1969.37	4499.48	2978.21	2236.05	913.662	4358.31	4786.21	5754.18	2708.91	4804.72	8069.16	10596.8	8360.05	10224.5	9369.72	10554.2	8193.51	11219.9	8636.31	9218.59	Phenylalanine
M151T186	16539.3	11139.3	12855.4	15487.5	6189.91	14906.4	17484.7	19040.6	26710.8	19817.2	18040.1	31749.1	15744.2	16337.8	18007.9	16254.9	17544.7	39297.8	19391.6	16722.7	Phenylalanine
M166T267	63961	46858.8	52126.4	47227.7	52877.2	54281.8	53190.6	50198.8	57907.6	62480.5	460072	305890	391447	302271	456954	353158	477704	375468	494954	385102	Phenylalanine
M167T173	11378.2	8076.3	10682.8	9105.32	11498.6	6446.59	10045.7	9946.15	10974.5	10230	16624.9	12617.8	17345.3	26802.7	25462.6	12942.9	16897.6	32510.5	15283.2	12140.2	Phenylalanine
M167T173	11378.2	8076.3	10682.8	9105.32	11498.6	6446.59	10045.7	9946.15	10974.5	10230	16624.9	12617.8	17345.3	26802.7	25462.6	12942.9	16897.6	32510.5	15283.2	12140.2	Phenylalanine
M182T309	5272.04	15871.2	7789.33	19393	8954.24	15575.7	18048.8	12385.9	9087.27	12714.6	27417	45340.7	32562.8	36381.2	32730.2	39176.4	30953.8	38991.6	31662.2	32968.8	Phenylalanine
M182T309	5272.04	15871.2	7789.33	19393	8954.24	15575.7	18048.8	12385.9	9087.27	12714.6	27417	45340.7	32562.8	36381.2	32730.2	39176.4	30953.8	38991.6	31662.2	32968.8	Phenylalanine
M182T417	4403.61	1550.09	4645.52	1695.72	1359.83	1453.35	1460.52	1392.61	2545.3	1739.49	3879.51	2514.49	2778.87	3407.9	4919.92	2940.92	3643.09	2468.24	2522.15	2896.67	Phenylalanine
M182T417	4403.61	1550.09	4645.52	1695.72	1359.83	1453.35	1460.52	1392.61	2545.3	1739.49	3879.51	2514.49	2778.87	3407.9	4919.92	2940.92	3643.09	2468.24	2522.15	2896.67	Phenylalanine
M182T126	6397.51	6553.24	6101.34	6100.21	6339.8	6281.32	7184.56	6789.94	7417.3	7513.55	6530.48	14598.5	11877.7	14214.7	12181	12774.4	16753.6	11923.5	11418.8	13226.7	Phenylalanine
M182T126	6397.51	6553.24	6101.34	6100.21	6339.8	6281.32	7184.56	6789.94	7417.3	7513.55	6530.48	14598.5	11877.7	14214.7	12181	12774.4	16753.6	11923.5	11418.8	13226.7	Phenylalanine
M182T210	7686.93	5623.21	4926.3	6491.93	5411.46	1556.92	2846.21	4724.9	2858.89	4864.52	4250.38	2765.77	4417.21	2016.92	4795.67	4742.77	5480.87	4433.94	4854.64	4708.21	Phenylalanine
M182T210	7686.93	5623.21	4926.3	6491.93	5411.46	1556.92	2846.21	4724.9	2858.89	4864.52	4250.38	2765.77	4417.21	2016.92	4795.67	4742.77	5480.87	4433.94	4854.64	4708.21	Phenylalanine
M184T112	5434.54	4856.01	4990.99	4448.11	4954.53	4616.67	5129.01	4891.33	5049.82	4782.91	44561	48166	62189.1	39163.2	60512.3	38688.9	49854.5	43689.6	58990.9	39028	Phenylalanine
M184T112	5434.54	4856.01	4990.99	4448.11	4954.53	4616.67	5129.01	4891.33	5049.82	4782.91	44561	48166	62189.1	39163.2	60512.3	38688.9	49854.5	43689.6	58990.9	39028	Phenylalanine
M186T431	2753.24	1945.82	689.985	2023.9	3344.13	2000.46	3245.83	2472.69	2558.95	3465.39	3382.32	4059.37	3615.21	4202.14	1532.35	3834.19	4494.13	3973.02	3745.45	3524.77	Phenylalanine
M186T405	4410.27	4160.92	3640.7	4021.56	4249.66	4338.28	3659.88	4754.05	4268.19	3372.24	3036.97	4676.76	3125.27	4762.18	3264.39	4120.48	3809	4146.6	2786.04	4041.23	Phenylalanine
M188T267	13997.7	16987.4	10941.4	17752.2	11310.7	17502.7	17354	21490.2	12824.3	20541.5	130804	118862	115194	127446	120590	154280	126659	143145	128476	153816	Phenylalanine
M208T216	19617.9	11165.8	9941.58	10820.2	10938.9	11457.1	10815.3	14393.4	18372.9	15072.9	1511.88	781.974	967.33	2421.33	1481.51	1026.84	1546.4	995.328	1903.21	964.959	Phenylalanine
M208T216	19617.9	11165.8	9941.58	10820.2	10938.9	11457.1	10815.3	14393.4	18372.9	15072.9	1511.88	781.974	967.33	2421.33	1481.51	1026.84	1546.4	995.328	1903.21	964.959	Phenylalanine
M208T33	3203.82	3543.56	1986.4	2985.66	1431.39	2731.97	3616.61	3189.97	3218.81	3088.87	12041.2	13699.4	12818.4	13172.4	13337	14278.1	13860.4	16429.3	11736.4	14298.3	Phenylalanine
M208T33	3203.82	3543.56	1986.4	2985.66	1431.39	2731.97	3616.61	3189.97	3218.81	3088.87	12041.2	13699.4	12818.4	13172.4	13337	14278.1	13860.4	16429.3	11736.4	14298.3	Phenylalanine
M230T216	1717.96	7256.95	13369.4	9170.77	6468.28	2771.35	2734.47	5713.47	6954.63	4861.78	1204.23	1166.7	1215.82	1123.08	1494.35	1239.05	558.447	1346.44	1371.15	1131.43	Phenylalanine
M230T216	1717.96	7256.95	13369.4	9170.77	6468.28	2771.35	2734.47	5713.47	6954.63	4861.78	1204.23	1166.7	1215.82	1123.08	1494.35	1239.05	558.447	1346.44	1371.15	1131.43	Phenylalanine
M265T431	534.436	1337.4	938.077	1458.78	927.693	1152.28	1061.44	1265.15	451.52	1099.73	1066.12	1328.8	1179.57	1205.45	1197.9	1555.18	1257.6	1671.79	1027.37	869.531	Phenylalanine
M182T309	5272.04	15871.2	7789.33	19393	8954.24	15575.7	18048.8	12385.9	9087.27	12714.6	27417	45340.7	32562.8	36381.2	32730.2	39176.4	30953.8	38991.6	31662.2	32968.8	Phenylpropanoid
M182T417	4403.61	1550.09	4645.52	1695.72	1359.83	1453.35	1460.52	1392.61	2545.3	1739.49	3879.51	2514.49	2778.87	3407.9	4919.92	2940.92	3643.09	2468.24	2522.15	2896.67	Phenylpropanoid
M182T126	6397.51	6553.24	6101.34	6100.21	6339.8	6281.32	7184.56	6789.94	7417.3	7513.55	6530.48	14598.5	11877.7	14214.7	12181	12774.4	16753.6	11923.5	11418.8	13226.7	Phenylpropanoid
M182T210	7686.93	5623.21	4926.3	6491.93	5411.46	1556.92	2846.21	4724.9	2858.89	4864.52	4250.38	2765.77	4417.21	2016.92	4795.67	4742.77	5480.87	4433.94	4854.64	4708.21	Phenylpropanoid
M182T309	5272.04	15871.2	7789.33	19393	8954.24	15575.7	18048.8	12385.9	9087.27	12714.6	27417	45340.7	32562.8	36381.2	32730.2	39176.4	30953.8	38991.6	31662.2	32968.8	Phenylpropanoid
M182T417	4403.61	1550.09	4645.52	1695.72	1359.83	1453.35	1460.52	1392.61	2545.3	1739.49	3879.51	2514.49	2778.87	3407.9	4919.92	2940.92	3643.09	2468.24	2522.15	2896.67	Phenylpropanoid
M182T126	6397.51	6553.24	6101.34	6100.21	6339.8	6281.32	7184.56	6789.94	7417.3	7513.55	6530.48	14598.5	11877.7	14214.7	12181	12774.4	16753.6	11923.5	11418.8	13226.7	Phenylpropanoid
M182T210	7686.93	5623.21	4926.3	6491.93	5411.46	1556.92	2846.21	4724.9	2858.89	4864.52	4250.38	2765.77	4417.21	2016.92	4795.67	4742.77	5480.87	4433.94	4854.64	4708.21	Phenylpropanoid
M179T285	28552.4	21620.6	30784.1	21797.7	29539.4	22512.2	21511.8	23888.2	33074.4	20932.5	939.208	1917.59	4784.27	2069.88	5080.99	2076.34	5111.94	2345.28	6593.66	2148.63	Phenylpropanoid
M179T65	19623.8	24707.7	15284.2	23939.1	18012.4	24112.3	23730.9	24250.7	20664.5	24759.1	314849	181090	316733	152640	332409	220814	310286	228755	315239	200949	Phenylpropanoid
M196T42	6743.38	5840.28	6868.43	2554.76	1105.6	6406.83	6314.06	6465.06	6388.55	5953.83	524.426	6467.61	1835.78	4126.66	8131.38	4217.29	3738.15	4914.68	8546.27	9670.5	Phenylpropanoid
M196T64	1761.52	5882.7	1497.21	5490.76	1744.2	4298.21	1585.13	4929.76	4041.07	4929.27	980.88	4845.59	3268.74	5105.38	4736.87	6921.57	3726.49	2998.61	3909.47	4373.57	Phenylpropanoid
M212T220	89051.8	116450	99847.8	108997	102172	94326.8	104066	124126	90844.2	95011.8	1811.42	2005.51	1463.71	1704.66	1169.95	1801.22	2095.99	2763.93	2228.43	2052.48	Phenylpropanoid
M149T38	4667.84	17141.9	5650.63	16517.9	1811.22	16500	9228.49	17444.2	19304.2	17400.2	55848.7	40553.5	29314.9	42726.2	42031	44462.8	56802.6	29636.2	28097.3	33119.4	Phenylpropanoid
M242T426	21940.9	15331.9	16556.2	21344.7	18412.9	17102.3	22351.6	23814.6	18401	14329.8	14815.9	20671.6	14686.7	14844.3	19360.8	14930	15939.2	19294.4	14092.6	16354.6	Phenylpropanoid
M167T173	11378.2	8076.3	10682.8	9105.32	11498.6	6446.59	10045.7	9946.15	10974.5	10230	16624.9	12617.8	17345.3	26802.7	25462.6	12942.9	16897.6	32510.5	15283.2	12140.2	Phenylpropanoid
M182T309	5272.04	15871.2	7789.33	19393	8954.24	15575.7	18048.8	12385.9	9087.27	12714.6	27417	45340.7	32562.8	36381.2	32730.2	39176.4	30953.8	38991.6	31662.2	32968.8	Phenylpropanoid
M182T309	5272.04	15871.2	7789.33	19393	8954.24	15575.7	18048.8	12385.9	9087.27	12714.6	27417	45340.7	32562.8	36381.2	32730.2	39176.4	30953.8	38991.6	31662.2	32968.8	Phenylpropanoid
M182T417	4403.61	1550.09	4645.52	1695.72	1359.83	1453.35	1460.52	1392.61	2545.3	1739.49	3879.51	2514.49	2778.87	3407.9	4919.92	2940.92	3643.09	2468.24	2522.15	2896.67	Phenylpropanoid
M182T417	4403.61	1550.09	4645.52	1695.72	1359.83	1453.35	1460.52	1392.61	2545.3	1739.49	3879.51	2514.49	2778.87	3407.9	4919.92	2940.92	3643.09	2468.24	2522.15	2896.67	Phenylpropanoid
M182T126	6397.51	6553.24	6101.34	6100.21	6339.8	6281.32	7184.56	6789.94	7417.3	7513.55	6530.48	14598.5	11877.7	14214.7	12181	12774.4	16753.6	11923.5	11418.8	13226.7	Phenylpropanoid
M182T126	6397.51	6553.24	6101.34	6100.21	6339.8	6281.32	7184.56	6789.94	7417.3	7513.55	6530.48	14598.5	11877.7	14214.7	12181	12774.4	16753.6	11923.5	11418.8	13226.7	Phenylpropanoid
M182T210	7686.93	5623.21	4926.3	6491.93	5411.46	1556.92	2846.21	4724.9	2858.89	4864.52	4250.38	2765.77	4417.21	2016.92	4795.67	4742.77	5480.87	4433.94	4854.64	4708.21	Phenylpropanoid
M182T210	7686.93	5623.21	4926.3	6491.93	5411.46	1556.92	2846.21	4724.9	2858.89	4864.52	4250.38	2765.77	4417.21	2016.92	4795.67	4742.77	5480.87	4433.94	4854.64	4708.21	Phenylpropanoid
M184T112	5434.54	4856.01	4990.99	4448.11	4954.53	4616.67	5129.01	4891.33	5049.82	4782.91	44561	48166	62189.1	39163.2	60512.3	38688.9	49854.5	43689.6	58990.9	39028	Phenylpropanoid
M309T223	7049.97	8489.88	9694.7	8004.67	8175.5	7328.07	8082.55	10068.5	7994.69	5319.68	5058.1	4664.62	4278.91	4676.76	4737.43	5255.96	5563.56	6273.11	5714.36	5405.98	Phenylpropanoid
M327T223	2184.51	1603.71	5379.67	5157.04	1010.8	3841.07	4501.56	5033.94	4872.29	4420.17	3847.11	3725.77	3738.07	3481.12	3960.01	3697.3	4025.46	1832.86	4138.83	3582.93	Phenylpropanoid
M344T328	1880.42	2253.95	2278.08	1432.53	3756.35	1729.88	1730.74	2988.27	1888.83	1985.68	6828.72	4031.99	8654.83	3948.65	5898.56	7239.41	5042.22	4469.88	5515.93	5258.22	Phenylpropanoid
M349T222	3092.17	4417.4	4013.54	3828.74	3893.84	2895.3	3221.18	3533.43	1088.23	2464.47	985.435	1455.96	1285.05	1928.46	1261.43	1845.11	1200.32	1710.99	1035.5	1407.91	Phenylpropanoid
M365T221	4543.82	5221.16	7513.09	6360.15	7243.33	5378.89	5349.16	5415.95	5537.02	3824.38	1704.21	1777.55	1720.52	1537.22	1866.68	1658.69	1534.71	1480.95	1854.45	1498.45	Phenylpropanoid
M121T41	9180.37	8023.69	8518.49	8240.78	9066.75	9193.13	9221.88	10500.7	8913.05	9292.32	14020.4	19251.5	18626.3	22712.3	16251.2	22216.4	13913.5	14615.7	14215.8	12604.4	Phenylpropanoid
M135T38	13014.4	13931.3	11546.8	13062.7	14784.2	14851.1	12225.6	12622.1	12355.2	11753.9	43041.8	52781.7	35051.6	56908	48241.7	11327.3	48287.3	49136.1	42939.7	8797.25	Phenylpropanoid
M135T38	13014.4	13931.3	11546.8	13062.7	14784.2	14851.1	12225.6	12622.1	12355.2	11753.9	43041.8	52781.7	35051.6	56908	48241.7	11327.3	48287.3	49136.1	42939.7	8797.25	Phenylpropanoid
M135T155	19742.4	13213.9	13444.5	9523.18	21312.2	8193.93	14624	4699.13	4611.6	8483.7	10320.5	6522.19	13127	7178.6	6844.54	11294.7	15866.2	16841.6	9379.79	11173.4	Phenylpropanoid
M135T155	19742.4	13213.9	13444.5	9523.18	21312.2	8193.93	14624	4699.13	4611.6	8483.7	10320.5	6522.19	13127	7178.6	6844.54	11294.7	15866.2	16841.6	9379.79	11173.4	Phenylpropanoid
M135T103	7430.03	8215.04	7672.56	8691.66	7232.43	2396.94	8576.11	9513	7659.47	9277.97	10755.6	11490.8	11619.6	12408.8	11604	12439.2	12035.2	13384.6	11024.9	12847.1	Phenylpropanoid
M135T103	7430.03	8215.04	7672.56	8691.66	7232.43	2396.94	8576.11	9513	7659.47	9277.97	10755.6	11490.8	11619.6	12408.8	11604	12439.2	12035.2	13384.6	11024.9	12847.1	Phenylpropanoid
M137T68	68657.1	59630.5	45807.2	82898.8	78102	36210.2	63334.5	43805.5	46334.1	54948.7	392163	689894	1.07316e+06	522294	807671	746547	815378	681794	847155	848097	Phenylpropanoid
M137T284	24566	18485.5	26104.9	18723.5	25374.6	22338.2	21566.3	21003.8	27848.1	26710.3	5093.47	13054.9	12118.4	14982.3	4451.7	14584.8	14299.9	14455.5	4969.4	15765.2	Phenylpropanoid
M137T195	608131	92821.8	261136	90818.1	463631	100974	98549.1	163814	160396	330669	245071	84399	125025	90985.5	136688	175771	135021	177563	149226	100976	Phenylpropanoid
M137T219	34566.7	26715.7	31727.4	38789	39196.9	23917.2	28427.8	43603.2	35722.2	28916.8	51061.6	16785.7	49681	25892.1	49251.9	20664.4	56370	19556.8	61130.2	19335.9	Phenylpropanoid
M137T44	112385	124095	107305	119739	100282	131952	136281	132994	122419	142357	1.10181e+06	670430	721716	816452	1.00162e+06	952087	1.16347e+06	1.01622e+06	804110	584416	Phenylpropanoid
M137T166	298583	246676	268458	263753	274833	328013	326596	367965	312493	339469	245326	72630	174671	199209	93050.9	193515	227422	197076	165997	162807	Phenylpropanoid
M165T125	16419.6	20551.4	5105.42	18030.7	24978.3	22361.9	17876.2	17200.7	21602.5	17269	18657.2	21182.1	19436.7	20950.3	20702.3	18576.7	351.712	22596.2	20929	19036.6	Phenylpropanoid
M165T125	16419.6	20551.4	5105.42	18030.7	24978.3	22361.9	17876.2	17200.7	21602.5	17269	18657.2	21182.1	19436.7	20950.3	20702.3	18576.7	351.712	22596.2	20929	19036.6	Phenylpropanoid
M166T64	14475.3	16313.5	16483.7	16276.8	14987.2	15763.8	15870.3	15100.3	16258.6	14182.5	10297.5	1761.7	11389.5	11656.6	11938.8	11929.1	11171.9	10966	11520.8	9414.61	Phenylpropanoid
M166T64	14475.3	16313.5	16483.7	16276.8	14987.2	15763.8	15870.3	15100.3	16258.6	14182.5	10297.5	1761.7	11389.5	11656.6	11938.8	11929.1	11171.9	10966	11520.8	9414.61	Phenylpropanoid
M171T36	6638.65	5798.27	6262.54	4468.19	1040.93	5155.57	6078.44	4511.19	6599.68	5321.39	2496.14	4059.77	10073.1	14778.4	11179.3	1951.39	12061	6047.5	11176.5	3369.41	Phenylpropanoid
M171T36	6638.65	5798.27	6262.54	4468.19	1040.93	5155.57	6078.44	4511.19	6599.68	5321.39	2496.14	4059.77	10073.1	14778.4	11179.3	1951.39	12061	6047.5	11176.5	3369.41	Phenylpropanoid
M179T39	7526.71	4424.83	9001.4	4843.08	7123.8	8076.22	4756.03	6100.66	8512.21	7498.54	30469.6	25632.4	26971.4	26893.9	27224.6	33354.1	30951	36591	30097.9	26232	Phenylpropanoid
M179T39	7526.71	4424.83	9001.4	4843.08	7123.8	8076.22	4756.03	6100.66	8512.21	7498.54	30469.6	25632.4	26971.4	26893.9	27224.6	33354.1	30951	36591	30097.9	26232	Phenylpropanoid
M179T171	36349.7	54889.3	46953.1	49391.5	33583	61628.2	51629.6	56498.1	37766.6	61612.8	14650.7	12085.1	14611.9	9779.62	15906.7	8434.09	17068.1	10356.4	10211.9	13056	Phenylpropanoid
M179T171	36349.7	54889.3	46953.1	49391.5	33583	61628.2	51629.6	56498.1	37766.6	61612.8	14650.7	12085.1	14611.9	9779.62	15906.7	8434.09	17068.1	10356.4	10211.9	13056	Phenylpropanoid
M193T41	11612.5	18826.3	13812.8	16763.5	14201.9	15250.5	17529.1	18841.2	14135.1	18873.4	21886.3	16994	27761	18245.4	28811.8	16146	26651.5	25768.9	23635.1	16015.1	Phenylpropanoid
M193T163	7234.51	6177.2	15200.2	8891.49	11346.8	6625.88	8561.63	7903.12	8213.66	8511.92	25480.3	5556.07	20140.1	15701	24274.5	15107.4	25343.5	14912.3	26656.8	11921.4	Phenylpropanoid
M210T38	64774.7	34363.3	59785.5	35988.6	63387.1	34194.3	33288.6	40062.3	66269.3	36828.5	92534.5	394403	83543.3	487344	89948.2	530470	103251	509696	87861.2	466209	Phenylpropanoid
M210T242	10602.9	4646.41	2346.21	4975.13	6544.5	5328.41	6043.1	7273.29	5127.83	5579.68	6015.03	13814.9	5018.96	7518.9	3889.23	4515.27	8863.86	11406.1	4057.84	4271.05	Phenylpropanoid
M215T14	811.116	993.51	862.415	813.393	781.237	770.755	808.979	795.96	785.436	817.294	824.955	897.955	994.164	787.965	814.89	852.766	881.556	837.629	934.864	825.408	Phenylpropanoid
M293T41	12475.6	5289.49	12276.3	6068.16	15937.5	7140.23	6363	8074.17	18085.8	7036.15	11810.4	51269.6	11034.2	53411.8	11860.4	64245.7	13935.6	53483.5	9697.24	56712.1	Phenylpropanoid
M349T41	767.924	5016.19	7197.8	2213.18	5759.9	6606.34	1646.87	3053.5	5052.23	2177.24	24496.7	13741.9	15465.6	12188.8	12441.4	13003.4	11085.1	17117.3	14891.6	14265.8	Phenylpropanoid
M390T221	5308.57	5229.81	4831.7	10993.5	5674.25	7929.37	697.84	3437.16	10890.3	4428.28	1378.39	2436.15	2102.08	3521.41	1831.17	1974.37	1501.26	1747.65	1386.39	1473.22	Phenylpropanoid
M409T321	29395.2	14801.5	13475.6	17411.9	19894.6	27916.5	20664.2	17995.5	25108	23890.5	5361.98	4904.5	4375.55	5412.2	4686.81	5040.64	4811.01	5436.68	5424.17	5023.53	Phenylpropanoid
M425T321	2856.53	14045.5	8966.76	9386.31	9700.66	13143.1	9989.53	12004.5	7163.37	10646.6	2104.74	1674.16	2718.21	2322.27	2545.01	2162.02	2691.13	2686.07	3050.68	1602.71	Phenylpropanoid
M606T202	7198.81	3313.61	2060.63	4441.37	4014.42	5230.24	6199.66	5604.21	5508.91	6297.95	3355.32	1956.04	1944.84	1650.98	2716.21	1957.42	3829.87	2888.96	3429.88	2730.25	Phenylpropanoid
M632T246	8662.15	8134.23	7720.64	6353.24	4965.07	6942.87	6452.1	7861.09	8121.53	8338.11	3307.85	3366.37	3583.39	2866.95	4370.07	4557.92	4328.06	3957.01	4956.9	2092.15	Phenylpropanoid
M696T215	1181.45	834.029	1297.37	616.51	1498.11	1116.19	509.998	1009.74	1370.35	1181.19	646.345	991.9	778.242	1006.73	774.285	883.792	727.51	813.995	648.546	759.266	Phenylpropanoid
M175T166	19635.4	21620.6	27118.2	12216.7	19296.3	24346.6	13909.4	13444.1	14645.2	22334.5	15013	18064.3	17714.4	11161.1	17850.1	19065.1	17952	18679.8	18876.4	17131.8	Phenylpropanoid
M181T183	17079.5	12925.2	10540.1	17958.3	16616.3	16250.2	15484.8	17516.1	16766.7	18345.1	23466.2	10880.8	43355.8	11071	34415	13140.9	17392	12575.4	35922.9	23958.3	Phenylpropanoid
M181T217	38773.4	68848.3	57840.5	34872.3	3616.57	38495	34740.7	41415.8	32835.7	38342.9	3895.95	2619.62	3439.68	2114.53	3864.68	2856.3	4033.6	2651.15	3893.04	2432.81	Phenylpropanoid
M181T36	14069.2	14039.4	14488.2	17550.7	9808.92	20025	17220.1	14132	16812.9	19442.4	66670	54693.4	72095.3	45210.4	59371.3	53019	49431.4	58767.4	62144.6	56851.8	Phenylpropanoid
M211T668	13587	39063.8	45467.2	18261.6	5517.14	13574.4	32633.8	15465.9	13018.1	6356.55	12735.1	14823.4	38119.3	10474.1	17145.9	13419.3	11063.8	8808.79	14894.7	11926.6	Phenylpropanoid
M212T220	89051.8	116450	99847.8	108997	102172	94326.8	104066	124126	90844.2	95011.8	1811.42	2005.51	1463.71	1704.66	1169.95	1801.22	2095.99	2763.93	2228.43	2052.48	Phenylpropanoid
M233T166	43319.5	39680.1	39842.3	28172.7	37921.2	27043.4	40803.8	46594.9	41097.2	42737.5	34347.5	31870.4	38270	37565.7	38786.6	34616.5	40075.7	35106.8	38950.4	34939.8	Phenylpropanoid
M147T223	2657.79	1337.27	1589.1	1575.52	2720.86	1351.4	1810.68	1821.51	2972.62	1818.48	2294.59	6480.46	2188.08	9625.2	2425.44	9804.84	2228.82	6073.83	2530.98	9679.3	Phenylpropanoid
M147T130	21368.1	17173.9	12220.8	20212	19532.3	18920.9	20080.7	19323.6	19840.1	19392.9	11324.6	43466.3	9541.69	47653.5	10715	51359.7	11761.3	59419.4	11438.1	49452.9	Phenylpropanoid
M147T31	3914.24	6582	1394.91	6173.01	2988.71	5318.39	19265.8	4612.3	3462.3	6147.51	12166.9	29177.4	10463	8688.62	11484.9	27680.3	11238.2	11444.7	44897.2	8492.41	Phenylpropanoid
M147T372	19776.5	12120.1	16519.4	14790.6	26637.6	11957.7	20393.3	13412.5	21139.3	13866.3	3791.93	4057.51	1757.44	1914.96	2285.37	2564.7	2185.83	1876.2	3769.15	3077.8	Phenylpropanoid
M147T280	11664.4	8181.68	15713.5	9367.34	11735.8	8506.83	8397.65	9008.08	17785.3	9030.18	1437.41	1779.8	2389.39	1373.74	3143.43	1959.72	2235.15	1428.44	1772.28	2442.59	Phenylpropanoid
M147T326	4921.07	3439.13	4484.62	3921.4	5850.73	3153.59	2786.3	4502.04	5683.63	3071.22	3301.29	4012.02	2968.8	2650.87	6945.55	7224.85	3584.15	3781.26	3809.1	2726.28	Phenylpropanoid
M147T180	8048.24	4539.78	4634.24	4155.24	4960.48	8771.72	7905.64	6717.02	10741.6	8452.11	7720.73	4162.33	4549.09	5132.04	5148.5	4390.51	6311.24	5466.59	4819.84	4643.8	Phenylpropanoid
M207T180	23419.9	25907.4	18892.1	28543	19528.2	24897.8	25737.6	24696.8	23653.1	27235.8	1537.07	1068.66	53393.4	49717.8	53002.9	53625.8	53285.3	1657.6	50242.5	52696.3	Phenylpropanoid
M207T31	8066.42	11997.6	8464	10583.4	6765.02	9935.43	11487.1	12333.3	7688.36	11595.5	8397.65	4909.47	3751.57	6763.67	65742	2815.18	8571.66	4134.95	6761.09	3073.33	Phenylpropanoid
M309T223	7049.97	8489.88	9694.7	8004.67	8175.5	7328.07	8082.55	10068.5	7994.69	5319.68	5058.1	4664.62	4278.91	4676.76	4737.43	5255.96	5563.56	6273.11	5714.36	5405.98	Phenylpropanoid
M327T223	2184.51	1603.71	5379.67	5157.04	1010.8	3841.07	4501.56	5033.94	4872.29	4420.17	3847.11	3725.77	3738.07	3481.12	3960.01	3697.3	4025.46	1832.86	4138.83	3582.93	Phenylpropanoid
M344T328	1880.42	2253.95	2278.08	1432.53	3756.35	1729.88	1730.74	2988.27	1888.83	1985.68	6828.72	4031.99	8654.83	3948.65	5898.56	7239.41	5042.22	4469.88	5515.93	5258.22	Phenylpropanoid
M349T222	3092.17	4417.4	4013.54	3828.74	3893.84	2895.3	3221.18	3533.43	1088.23	2464.47	985.435	1455.96	1285.05	1928.46	1261.43	1845.11	1200.32	1710.99	1035.5	1407.91	Phenylpropanoid
M365T221	4543.82	5221.16	7513.09	6360.15	7243.33	5378.89	5349.16	5415.95	5537.02	3824.38	1704.21	1777.55	1720.52	1537.22	1866.68	1658.69	1534.71	1480.95	1854.45	1498.45	Phenylpropanoid
M283T171_1	2712.49	8767.21	11141.9	5444.2	5037.2	4181.08	3574.48	2987.8	1444.78	2998.6	38818.6	28025	45165.4	32130.3	41319.8	37273.5	33726.4	27970.5	28602.3	25018.8	Sugar
M343T413	1022.36	2096.54	1460.59	1938.16	835.719	2652.52	4664.36	3018.51	2049.56	1493.17	2222.38	2984.14	3350.08	2828.15	3007.9	2973.78	2871.02	1342.89	2747.96	2737.67	Sugar
M360T414	5932.83	9882.4	9660.56	10373.4	9186.14	6122.63	5995.91	9590.65	11181.7	3260.87	21272	24697.1	20997.8	21520.9	36748.4	31181	32462.2	31595.5	20851.5	17135.4	Sugar
M360T125	13383.5	15253.3	14224.6	15834.5	12764.1	8031.31	15043.3	16246	13219.3	14841.2	5836.75	5129.44	4040.37	4987.31	5724.46	2014.55	6109.9	4880.51	6654.79	4898.66	Sugar
M365T414	49680	20219.2	48175.9	39602.7	43586.8	50751.9	58264.9	17032.9	41286.9	38018.2	118962	115625	112723	123455	128667	108321	120662	103851	118484	97590.1	Sugar
M365T388	213323	236613	243338	231854	187461	233528	230276	225621	231804	166343	144346	127465	167481	246059	170281	504669	151606	482480	139947	107647	Sugar
M365T456	6564.3	4310.95	8270.32	4150.59	4680.32	6946.23	5071.57	5050.97	5953.33	5493.96	7294.64	9615.17	5290.07	8876.9	6803.86	6888.65	5975.2	7260.69	6855.61	9342.09	Sugar
M365T364	1.28682e+06	1.09908e+06	1.17028e+06	1.04039e+06	1.25687e+06	1.17029e+06	1.08381e+06	1.08989e+06	1.38994e+06	1.24192e+06	123069	100430	125996	134646	126073	130373	121602	131251	123854	127410	Sugar
M365T499	7604	11439.3	7435.89	9557.57	4902.58	4127.6	4504.04	4901.02	6346.76	5258.08	7666.8	8386.95	8197.15	8078.79	7491.15	8111.42	7104.99	8530.09	9779.59	9129.18	Sugar
M381T414	22663.9	12599	11220.2	19081.3	20569.7	18910.1	20248.9	19837.6	12828.6	19384.7	57659.2	17273.5	58654.9	55467.5	17729.2	42293.4	66216.3	41957.1	68587.5	41599.2	Sugar
M381T392	37943.2	54707.5	42455.1	52209.4	53510.7	51401.6	52703.3	69055.4	36119	68392.4	175782	143681	227995	142967	202442	142722	180594	127658	107943	131218	Sugar
M381T363	312777	423301	317722	351350	324397	343445	324382	332170	293920	369589	95211.7	161825	98067.4	154752	104361	124073	116859	116309	98611	142411	Sugar
M403T415	3518.13	4470.54	4900.37	6148.42	3580.72	4731.84	5367.83	6528.12	3779.78	5470.64	36760.8	1455.96	2826.76	1935.99	38621.2	1556.08	35513	3766.72	35596	1506.8	Sugar
M343T413	1022.36	2096.54	1460.59	1938.16	835.719	2652.52	4664.36	3018.51	2049.56	1493.17	2222.38	2984.14	3350.08	2828.15	3007.9	2973.78	2871.02	1342.89	2747.96	2737.67	Sugar
M360T414	5932.83	9882.4	9660.56	10373.4	9186.14	6122.63	5995.91	9590.65	11181.7	3260.87	21272	24697.1	20997.8	21520.9	36748.4	31181	32462.2	31595.5	20851.5	17135.4	Sugar
M360T125	13383.5	15253.3	14224.6	15834.5	12764.1	8031.31	15043.3	16246	13219.3	14841.2	5836.75	5129.44	4040.37	4987.31	5724.46	2014.55	6109.9	4880.51	6654.79	4898.66	Sugar
M365T414	49680	20219.2	48175.9	39602.7	43586.8	50751.9	58264.9	17032.9	41286.9	38018.2	118962	115625	112723	123455	128667	108321	120662	103851	118484	97590.1	Sugar
M365T388	213323	236613	243338	231854	187461	233528	230276	225621	231804	166343	144346	127465	167481	246059	170281	504669	151606	482480	139947	107647	Sugar
M365T456	6564.3	4310.95	8270.32	4150.59	4680.32	6946.23	5071.57	5050.97	5953.33	5493.96	7294.64	9615.17	5290.07	8876.9	6803.86	6888.65	5975.2	7260.69	6855.61	9342.09	Sugar
M365T364	1.28682e+06	1.09908e+06	1.17028e+06	1.04039e+06	1.25687e+06	1.17029e+06	1.08381e+06	1.08989e+06	1.38994e+06	1.24192e+06	123069	100430	125996	134646	126073	130373	121602	131251	123854	127410	Sugar
M365T499	7604	11439.3	7435.89	9557.57	4902.58	4127.6	4504.04	4901.02	6346.76	5258.08	7666.8	8386.95	8197.15	8078.79	7491.15	8111.42	7104.99	8530.09	9779.59	9129.18	Sugar
M381T414	22663.9	12599	11220.2	19081.3	20569.7	18910.1	20248.9	19837.6	12828.6	19384.7	57659.2	17273.5	58654.9	55467.5	17729.2	42293.4	66216.3	41957.1	68587.5	41599.2	Sugar
M381T392	37943.2	54707.5	42455.1	52209.4	53510.7	51401.6	52703.3	69055.4	36119	68392.4	175782	143681	227995	142967	202442	142722	180594	127658	107943	131218	Sugar
M381T363	312777	423301	317722	351350	324397	343445	324382	332170	293920	369589	95211.7	161825	98067.4	154752	104361	124073	116859	116309	98611	142411	Sugar
M403T415	3518.13	4470.54	4900.37	6148.42	3580.72	4731.84	5367.83	6528.12	3779.78	5470.64	36760.8	1455.96	2826.76	1935.99	38621.2	1556.08	35513	3766.72	35596	1506.8	Sugar
M283T171_1	2712.49	8767.21	11141.9	5444.2	5037.2	4181.08	3574.48	2987.8	1444.78	2998.6	38818.6	28025	45165.4	32130.3	41319.8	37273.5	33726.4	27970.5	28602.3	25018.8	Sugar
M343T413	1022.36	2096.54	1460.59	1938.16	835.719	2652.52	4664.36	3018.51	2049.56	1493.17	2222.38	2984.14	3350.08	2828.15	3007.9	2973.78	2871.02	1342.89	2747.96	2737.67	Sugar
M360T414	5932.83	9882.4	9660.56	10373.4	9186.14	6122.63	5995.91	9590.65	11181.7	3260.87	21272	24697.1	20997.8	21520.9	36748.4	31181	32462.2	31595.5	20851.5	17135.4	Sugar
M360T125	13383.5	15253.3	14224.6	15834.5	12764.1	8031.31	15043.3	16246	13219.3	14841.2	5836.75	5129.44	4040.37	4987.31	5724.46	2014.55	6109.9	4880.51	6654.79	4898.66	Sugar
M365T414	49680	20219.2	48175.9	39602.7	43586.8	50751.9	58264.9	17032.9	41286.9	38018.2	118962	115625	112723	123455	128667	108321	120662	103851	118484	97590.1	Sugar
M365T388	213323	236613	243338	231854	187461	233528	230276	225621	231804	166343	144346	127465	167481	246059	170281	504669	151606	482480	139947	107647	Sugar
M365T456	6564.3	4310.95	8270.32	4150.59	4680.32	6946.23	5071.57	5050.97	5953.33	5493.96	7294.64	9615.17	5290.07	8876.9	6803.86	6888.65	5975.2	7260.69	6855.61	9342.09	Sugar
M365T364	1.28682e+06	1.09908e+06	1.17028e+06	1.04039e+06	1.25687e+06	1.17029e+06	1.08381e+06	1.08989e+06	1.38994e+06	1.24192e+06	123069	100430	125996	134646	126073	130373	121602	131251	123854	127410	Sugar
M365T499	7604	11439.3	7435.89	9557.57	4902.58	4127.6	4504.04	4901.02	6346.76	5258.08	7666.8	8386.95	8197.15	8078.79	7491.15	8111.42	7104.99	8530.09	9779.59	9129.18	Sugar
M381T414	22663.9	12599	11220.2	19081.3	20569.7	18910.1	20248.9	19837.6	12828.6	19384.7	57659.2	17273.5	58654.9	55467.5	17729.2	42293.4	66216.3	41957.1	68587.5	41599.2	Sugar
M381T392	37943.2	54707.5	42455.1	52209.4	53510.7	51401.6	52703.3	69055.4	36119	68392.4	175782	143681	227995	142967	202442	142722	180594	127658	107943	131218	Sugar
M381T363	312777	423301	317722	351350	324397	343445	324382	332170	293920	369589	95211.7	161825	98067.4	154752	104361	124073	116859	116309	98611	142411	Sugar
M403T415	3518.13	4470.54	4900.37	6148.42	3580.72	4731.84	5367.83	6528.12	3779.78	5470.64	36760.8	1455.96	2826.76	1935.99	38621.2	1556.08	35513	3766.72	35596	1506.8	Sugar
M283T171_1	2712.49	8767.21	11141.9	5444.2	5037.2	4181.08	3574.48	2987.8	1444.78	2998.6	38818.6	28025	45165.4	32130.3	41319.8	37273.5	33726.4	27970.5	28602.3	25018.8	Sugar
M343T413	1022.36	2096.54	1460.59	1938.16	835.719	2652.52	4664.36	3018.51	2049.56	1493.17	2222.38	2984.14	3350.08	2828.15	3007.9	2973.78	2871.02	1342.89	2747.96	2737.67	Sugar
M343T413	1022.36	2096.54	1460.59	1938.16	835.719	2652.52	4664.36	3018.51	2049.56	1493.17	2222.38	2984.14	3350.08	2828.15	3007.9	2973.78	2871.02	1342.89	2747.96	2737.67	Sugar
M358T166	21282.1	24036	9595.84	20476.8	21947.5	12175.1	16488.3	21690.6	20820.9	20614	2972.76	7808.56	6965.33	7057.34	5779.75	7578.79	5682.86	7064.42	6552.51	2768.34	Sugar
M358T132	9304.68	13487.7	33230.5	14902.4	20531.5	13779.7	11027.6	16458	34752.7	21548.2	9548.34	8551.92	10767	7770.94	9413.23	8161.64	10275.5	7900.54	9847.07	7122.9	Sugar
M360T414	5932.83	9882.4	9660.56	10373.4	9186.14	6122.63	5995.91	9590.65	11181.7	3260.87	21272	24697.1	20997.8	21520.9	36748.4	31181	32462.2	31595.5	20851.5	17135.4	Sugar
M360T414	5932.83	9882.4	9660.56	10373.4	9186.14	6122.63	5995.91	9590.65	11181.7	3260.87	21272	24697.1	20997.8	21520.9	36748.4	31181	32462.2	31595.5	20851.5	17135.4	Sugar
M360T125	13383.5	15253.3	14224.6	15834.5	12764.1	8031.31	15043.3	16246	13219.3	14841.2	5836.75	5129.44	4040.37	4987.31	5724.46	2014.55	6109.9	4880.51	6654.79	4898.66	Sugar
M360T125	13383.5	15253.3	14224.6	15834.5	12764.1	8031.31	15043.3	16246	13219.3	14841.2	5836.75	5129.44	4040.37	4987.31	5724.46	2014.55	6109.9	4880.51	6654.79	4898.66	Sugar
M363T461	635.672	702.887	753.578	844.905	680.409	900.359	841.943	807.313	678.039	770.175	1232.27	966.7	1160.78	1021.85	1220.9	1183.38	911.81	1116.3	1130.4	1120.81	Sugar
M365T414	49680	20219.2	48175.9	39602.7	43586.8	50751.9	58264.9	17032.9	41286.9	38018.2	118962	115625	112723	123455	128667	108321	120662	103851	118484	97590.1	Sugar
M365T414	49680	20219.2	48175.9	39602.7	43586.8	50751.9	58264.9	17032.9	41286.9	38018.2	118962	115625	112723	123455	128667	108321	120662	103851	118484	97590.1	Sugar
M365T388	213323	236613	243338	231854	187461	233528	230276	225621	231804	166343	144346	127465	167481	246059	170281	504669	151606	482480	139947	107647	Sugar
M365T388	213323	236613	243338	231854	187461	233528	230276	225621	231804	166343	144346	127465	167481	246059	170281	504669	151606	482480	139947	107647	Sugar
M365T456	6564.3	4310.95	8270.32	4150.59	4680.32	6946.23	5071.57	5050.97	5953.33	5493.96	7294.64	9615.17	5290.07	8876.9	6803.86	6888.65	5975.2	7260.69	6855.61	9342.09	Sugar
M365T456	6564.3	4310.95	8270.32	4150.59	4680.32	6946.23	5071.57	5050.97	5953.33	5493.96	7294.64	9615.17	5290.07	8876.9	6803.86	6888.65	5975.2	7260.69	6855.61	9342.09	Sugar
M365T364	1.28682e+06	1.09908e+06	1.17028e+06	1.04039e+06	1.25687e+06	1.17029e+06	1.08381e+06	1.08989e+06	1.38994e+06	1.24192e+06	123069	100430	125996	134646	126073	130373	121602	131251	123854	127410	Sugar
M365T364	1.28682e+06	1.09908e+06	1.17028e+06	1.04039e+06	1.25687e+06	1.17029e+06	1.08381e+06	1.08989e+06	1.38994e+06	1.24192e+06	123069	100430	125996	134646	126073	130373	121602	131251	123854	127410	Sugar
M365T499	7604	11439.3	7435.89	9557.57	4902.58	4127.6	4504.04	4901.02	6346.76	5258.08	7666.8	8386.95	8197.15	8078.79	7491.15	8111.42	7104.99	8530.09	9779.59	9129.18	Sugar
M365T499	7604	11439.3	7435.89	9557.57	4902.58	4127.6	4504.04	4901.02	6346.76	5258.08	7666.8	8386.95	8197.15	8078.79	7491.15	8111.42	7104.99	8530.09	9779.59	9129.18	Sugar
M381T414	22663.9	12599	11220.2	19081.3	20569.7	18910.1	20248.9	19837.6	12828.6	19384.7	57659.2	17273.5	58654.9	55467.5	17729.2	42293.4	66216.3	41957.1	68587.5	41599.2	Sugar
M381T414	22663.9	12599	11220.2	19081.3	20569.7	18910.1	20248.9	19837.6	12828.6	19384.7	57659.2	17273.5	58654.9	55467.5	17729.2	42293.4	66216.3	41957.1	68587.5	41599.2	Sugar
M381T392	37943.2	54707.5	42455.1	52209.4	53510.7	51401.6	52703.3	69055.4	36119	68392.4	175782	143681	227995	142967	202442	142722	180594	127658	107943	131218	Sugar
M381T392	37943.2	54707.5	42455.1	52209.4	53510.7	51401.6	52703.3	69055.4	36119	68392.4	175782	143681	227995	142967	202442	142722	180594	127658	107943	131218	Sugar
M381T363	312777	423301	317722	351350	324397	343445	324382	332170	293920	369589	95211.7	161825	98067.4	154752	104361	124073	116859	116309	98611	142411	Sugar
M381T363	312777	423301	317722	351350	324397	343445	324382	332170	293920	369589	95211.7	161825	98067.4	154752	104361	124073	116859	116309	98611	142411	Sugar
M403T415	3518.13	4470.54	4900.37	6148.42	3580.72	4731.84	5367.83	6528.12	3779.78	5470.64	36760.8	1455.96	2826.76	1935.99	38621.2	1556.08	35513	3766.72	35596	1506.8	Sugar
M403T415	3518.13	4470.54	4900.37	6148.42	3580.72	4731.84	5367.83	6528.12	3779.78	5470.64	36760.8	1455.96	2826.76	1935.99	38621.2	1556.08	35513	3766.72	35596	1506.8	Sugar
M180T255	52973.7	55051.7	57415.4	62697.7	56882.5	65223.7	55125.1	63524.2	57176.1	63510.1	31437.7	39379.7	38574.1	40047.5	37242.1	32985.8	39963.7	40270.8	36832.2	43142.9	Sugar
M194T321	3.43552e+06	3.20944e+06	291173	3.45083e+06	2.94074e+06	3.96352e+06	4.13031e+06	3.98635e+06	3.24632e+06	4.25334e+06	1537.39	2016.74	1385.65	2410.61	1034.34	3001.93	1643.78	2693.24	2067.43	2295.38	Sugar
M199T195	2854.81	1883.21	377.739	2077.05	280.317	799.08	2095.8	3056.37	2719.92	2426.82	3497.15	2633.24	2790.18	2160.68	3406.82	1987.26	3535.15	2489.47	3735.16	2624.06	Sugar
M199T324	1765.18	2055.65	2219.44	2285.21	1619.53	1393.58	2695.68	2255.82	2097	1508.71	850.668	1533.22	1072.1	1444.13	856.441	1593.5	929.421	1858.17	985.621	1453.55	Sugar
M198T302	43066.4	40332.5	45350.1	40411.1	44376.5	41370.8	41789.6	39130.9	18002.5	43683.1	44357	24527.4	48271.5	24479.1	47380	53268.4	49718.1	55034.1	49726.8	24049.8	Sugar
M198T254	20114.7	29162.6	20107	25011.8	25118.3	26037.6	23535.6	28166.7	21590.7	22513.1	14905.8	22105.4	19024.5	20489	19217.8	15268.1	17736.4	17178.3	15356.6	17972.4	Sugar
M198T389	2474.52	1634.05	2287.31	2090.75	1142.46	2127.73	1146.5	2134.26	2275.73	1066.93	1251.74	2667.78	1854.62	2407.01	1990.31	2227.08	1755.3	1240.42	1885.1	1585.18	Sugar
M203T303	23009.3	37741.4	42105.6	32551.2	37435.6	35878.7	35427.3	19586.4	28508.2	31074.6	58825.9	68508.4	59473.8	50357.8	57891.9	63840.7	55166.1	47154.1	40770.2	55069.1	Sugar
M203T389	3483.73	1634.66	1534.17	1111.65	3660.97	3505.93	2431.33	1708.29	3155.73	2320.34	3002.35	8218.74	3546.68	3336.54	3121.25	3471.39	3942.47	3416.77	3693.53	2921.87	Sugar
M203T258	371984	453955	432608	486108	419353	480109	446212	463150	398091	421904	129653	164837	144232	187660	142711	181699	148530	173743	139050	172324	Sugar
M269T342	33956	39750.4	28615.9	45421.6	33297.7	49902.3	43016.6	46170.4	33792.4	50190.9	16357	12937.3	18258.8	11749.5	21236.9	13072.4	18171.2	13897.7	23142.6	13799.1	Sugar
M291T327	1474.49	4294.38	2543.28	3187.52	4503.76	1851.22	2071.47	3071.94	3510.11	3039.47	7413.07	7690.61	8223.79	8176.44	8387.8	8022.44	8058.73	7561.9	7844.18	8298.49	Sugar
M308T389	22735.3	24385.1	28629.5	25280.4	25866.2	23886.6	22122.4	20901.1	23061.3	20304.2	19463.6	13359.7	21009.2	12151.7	19034.5	13033.4	20229.3	10797.2	18549.5	10575.4	Sugar
M283T171_1	2712.49	8767.21	11141.9	5444.2	5037.2	4181.08	3574.48	2987.8	1444.78	2998.6	38818.6	28025	45165.4	32130.3	41319.8	37273.5	33726.4	27970.5	28602.3	25018.8	Sugar
M283T171_1	2712.49	8767.21	11141.9	5444.2	5037.2	4181.08	3574.48	2987.8	1444.78	2998.6	38818.6	28025	45165.4	32130.3	41319.8	37273.5	33726.4	27970.5	28602.3	25018.8	Sugar
M234T249	983.393	1667.98	1297.81	1086.04	852.678	1203.15	1147.25	1341.76	1086.42	901.433	2404.72	919.891	1835.16	1961.41	2424.49	794.892	2368.05	473.049	896.681	317.52	Sugar
M198T302	43066.4	40332.5	45350.1	40411.1	44376.5	41370.8	41789.6	39130.9	18002.5	43683.1	44357	24527.4	48271.5	24479.1	47380	53268.4	49718.1	55034.1	49726.8	24049.8	Sugar
M198T254	20114.7	29162.6	20107	25011.8	25118.3	26037.6	23535.6	28166.7	21590.7	22513.1	14905.8	22105.4	19024.5	20489	19217.8	15268.1	17736.4	17178.3	15356.6	17972.4	Sugar
M198T389	2474.52	1634.05	2287.31	2090.75	1142.46	2127.73	1146.5	2134.26	2275.73	1066.93	1251.74	2667.78	1854.62	2407.01	1990.31	2227.08	1755.3	1240.42	1885.1	1585.18	Sugar
M203T303	23009.3	37741.4	42105.6	32551.2	37435.6	35878.7	35427.3	19586.4	28508.2	31074.6	58825.9	68508.4	59473.8	50357.8	57891.9	63840.7	55166.1	47154.1	40770.2	55069.1	Sugar
M203T389	3483.73	1634.66	1534.17	1111.65	3660.97	3505.93	2431.33	1708.29	3155.73	2320.34	3002.35	8218.74	3546.68	3336.54	3121.25	3471.39	3942.47	3416.77	3693.53	2921.87	Sugar
M203T258	371984	453955	432608	486108	419353	480109	446212	463150	398091	421904	129653	164837	144232	187660	142711	181699	148530	173743	139050	172324	Sugar
M198T302	43066.4	40332.5	45350.1	40411.1	44376.5	41370.8	41789.6	39130.9	18002.5	43683.1	44357	24527.4	48271.5	24479.1	47380	53268.4	49718.1	55034.1	49726.8	24049.8	Sugar
M198T254	20114.7	29162.6	20107	25011.8	25118.3	26037.6	23535.6	28166.7	21590.7	22513.1	14905.8	22105.4	19024.5	20489	19217.8	15268.1	17736.4	17178.3	15356.6	17972.4	Sugar
M198T389	2474.52	1634.05	2287.31	2090.75	1142.46	2127.73	1146.5	2134.26	2275.73	1066.93	1251.74	2667.78	1854.62	2407.01	1990.31	2227.08	1755.3	1240.42	1885.1	1585.18	Sugar
M203T303	23009.3	37741.4	42105.6	32551.2	37435.6	35878.7	35427.3	19586.4	28508.2	31074.6	58825.9	68508.4	59473.8	50357.8	57891.9	63840.7	55166.1	47154.1	40770.2	55069.1	Sugar
M203T389	3483.73	1634.66	1534.17	1111.65	3660.97	3505.93	2431.33	1708.29	3155.73	2320.34	3002.35	8218.74	3546.68	3336.54	3121.25	3471.39	3942.47	3416.77	3693.53	2921.87	Sugar
M203T258	371984	453955	432608	486108	419353	480109	446212	463150	398091	421904	129653	164837	144232	187660	142711	181699	148530	173743	139050	172324	Sugar
M273T248	2892	3450.39	3226.06	2886.42	3479.32	2612.46	3317.13	2726.48	2644.08	2570.08	7569	8189.85	14119.2	10073.4	8869.98	6694.55	7418.07	6248.91	5784.79	6167.75	Sugar
M309T135	20290.6	20739.7	19969.6	22793.4	20153.2	23184.8	21429.8	22388.8	19863.9	21797.3	47964	33402	42817	32615.2	44731.3	33245	45373.9	32387.6	44874.9	33601.6	Sugar
M336T246	2299	2484.85	3168.05	2744.52	2905.35	2347.97	2764.1	2832.09	2890.25	2260.28	25983.1	16663.3	27465.5	18899.5	24509.1	17566.7	25715.7	15878.6	20034.5	15324.2	Sugar
M353T344	3701.02	993.852	4424.28	2134.99	4380.64	3814.54	4263.3	3722.81	4095.95	4156.53	7031.53	3857.38	3480.46	2916.2	3384.23	3768.36	3305.19	3681.39	3795.45	3289.03	Sugar
M367T371	3587.28	3193.51	4688.13	3096.69	3701.89	2518.28	3266.4	2477.34	3587.06	2831.1	4242.85	6364.99	6243.38	6239.66	4279.78	5309.89	4949.57	4736.85	3849.1	3871.48	Sugar
M375T335	4224.7	3382.77	3505.78	3286.97	2373.51	4390.75	2737.21	3206.72	4463.22	3789.72	5164.32	12637.2	4762.36	5630.71	3914.14	11315.7	5253.02	11446.7	4770.75	5525.47	Sugar
M391T343	3372.42	2794.33	3194.24	2610.95	3043.1	2637.29	3158.65	3084.06	2727.48	3375.18	13571.5	9886.72	4641.16	4419.55	9659.36	4697.9	14316	9809.65	13925.5	4563.52	Sugar
M391T278	2389.04	5890.82	9722	6164.19	7243.68	6569.67	7971.27	1402.87	3656.21	6352.48	7130.46	2481.96	3023.39	2194.62	6990.88	6139.45	3486.58	5224.9	1449.06	5138.01	Sugar
M405T329	423.981	422.718	465.66	482.404	377.045	122.948	343.345	535.413	400.917	136.478	657.176	672.557	701.797	759.709	700.931	670.596	558.926	689.726	628.42	707.453	Sugar
M198T302	43066.4	40332.5	45350.1	40411.1	44376.5	41370.8	41789.6	39130.9	18002.5	43683.1	44357	24527.4	48271.5	24479.1	47380	53268.4	49718.1	55034.1	49726.8	24049.8	Sugar
M198T254	20114.7	29162.6	20107	25011.8	25118.3	26037.6	23535.6	28166.7	21590.7	22513.1	14905.8	22105.4	19024.5	20489	19217.8	15268.1	17736.4	17178.3	15356.6	17972.4	Sugar
M198T389	2474.52	1634.05	2287.31	2090.75	1142.46	2127.73	1146.5	2134.26	2275.73	1066.93	1251.74	2667.78	1854.62	2407.01	1990.31	2227.08	1755.3	1240.42	1885.1	1585.18	Sugar
M203T303	23009.3	37741.4	42105.6	32551.2	37435.6	35878.7	35427.3	19586.4	28508.2	31074.6	58825.9	68508.4	59473.8	50357.8	57891.9	63840.7	55166.1	47154.1	40770.2	55069.1	Sugar
M203T389	3483.73	1634.66	1534.17	1111.65	3660.97	3505.93	2431.33	1708.29	3155.73	2320.34	3002.35	8218.74	3546.68	3336.54	3121.25	3471.39	3942.47	3416.77	3693.53	2921.87	Sugar
M203T258	371984	453955	432608	486108	419353	480109	446212	463150	398091	421904	129653	164837	144232	187660	142711	181699	148530	173743	139050	172324	Sugar
M183T407	763.14	632.856	853.89	809.257	717.733	968.555	624.063	846.466	659.569	702.112	1098.72	1770.9	1486.13	1861.34	1455.18	1288.04	1843	1789.19	1075.53	1268.71	Sugar
M198T302	43066.4	40332.5	45350.1	40411.1	44376.5	41370.8	41789.6	39130.9	18002.5	43683.1	44357	24527.4	48271.5	24479.1	47380	53268.4	49718.1	55034.1	49726.8	24049.8	Sugar
M198T254	20114.7	29162.6	20107	25011.8	25118.3	26037.6	23535.6	28166.7	21590.7	22513.1	14905.8	22105.4	19024.5	20489	19217.8	15268.1	17736.4	17178.3	15356.6	17972.4	Sugar
M198T389	2474.52	1634.05	2287.31	2090.75	1142.46	2127.73	1146.5	2134.26	2275.73	1066.93	1251.74	2667.78	1854.62	2407.01	1990.31	2227.08	1755.3	1240.42	1885.1	1585.18	Sugar
M200T37	3669.87	3596.99	4611.31	3788.76	4748.6	4450.07	3286.31	3733.73	4768.04	2870.86	3612.11	838.228	3658.63	2901.4	3257.96	3453.71	3707.26	4566.09	4086.26	1292.5	Sugar
M203T303	23009.3	37741.4	42105.6	32551.2	37435.6	35878.7	35427.3	19586.4	28508.2	31074.6	58825.9	68508.4	59473.8	50357.8	57891.9	63840.7	55166.1	47154.1	40770.2	55069.1	Sugar
M203T389	3483.73	1634.66	1534.17	1111.65	3660.97	3505.93	2431.33	1708.29	3155.73	2320.34	3002.35	8218.74	3546.68	3336.54	3121.25	3471.39	3942.47	3416.77	3693.53	2921.87	Sugar
M203T258	371984	453955	432608	486108	419353	480109	446212	463150	398091	421904	129653	164837	144232	187660	142711	181699	148530	173743	139050	172324	Sugar
M205T297	1879.87	4062.02	2830.13	4682.42	1783.02	1306.71	4707.16	5388.25	4308.82	4486.99	2566.9	4790.39	3923.37	4348.2	3863.92	4782.58	3246.75	3490.67	2535.32	4178.04	Sugar
M178T142	63814.8	62437.7	44277.2	5981.51	11447.7	62134.7	57350.2	63409.5	60252.2	34258.3	21703.5	18380.3	58678.9	14399.2	16471.4	17654.3	42188.5	30957.9	2504.7	60944	Sugar
M180T255	52973.7	55051.7	57415.4	62697.7	56882.5	65223.7	55125.1	63524.2	57176.1	63510.1	31437.7	39379.7	38574.1	40047.5	37242.1	32985.8	39963.7	40270.8	36832.2	43142.9	Sugar
M180T255	52973.7	55051.7	57415.4	62697.7	56882.5	65223.7	55125.1	63524.2	57176.1	63510.1	31437.7	39379.7	38574.1	40047.5	37242.1	32985.8	39963.7	40270.8	36832.2	43142.9	Sugar
M180T255	52973.7	55051.7	57415.4	62697.7	56882.5	65223.7	55125.1	63524.2	57176.1	63510.1	31437.7	39379.7	38574.1	40047.5	37242.1	32985.8	39963.7	40270.8	36832.2	43142.9	Sugar
M180T255	52973.7	55051.7	57415.4	62697.7	56882.5	65223.7	55125.1	63524.2	57176.1	63510.1	31437.7	39379.7	38574.1	40047.5	37242.1	32985.8	39963.7	40270.8	36832.2	43142.9	Sugar
M198T302	43066.4	40332.5	45350.1	40411.1	44376.5	41370.8	41789.6	39130.9	18002.5	43683.1	44357	24527.4	48271.5	24479.1	47380	53268.4	49718.1	55034.1	49726.8	24049.8	Sugar
M198T302	43066.4	40332.5	45350.1	40411.1	44376.5	41370.8	41789.6	39130.9	18002.5	43683.1	44357	24527.4	48271.5	24479.1	47380	53268.4	49718.1	55034.1	49726.8	24049.8	Sugar
M198T302	43066.4	40332.5	45350.1	40411.1	44376.5	41370.8	41789.6	39130.9	18002.5	43683.1	44357	24527.4	48271.5	24479.1	47380	53268.4	49718.1	55034.1	49726.8	24049.8	Sugar
M198T254	20114.7	29162.6	20107	25011.8	25118.3	26037.6	23535.6	28166.7	21590.7	22513.1	14905.8	22105.4	19024.5	20489	19217.8	15268.1	17736.4	17178.3	15356.6	17972.4	Sugar
M198T254	20114.7	29162.6	20107	25011.8	25118.3	26037.6	23535.6	28166.7	21590.7	22513.1	14905.8	22105.4	19024.5	20489	19217.8	15268.1	17736.4	17178.3	15356.6	17972.4	Sugar
M198T254	20114.7	29162.6	20107	25011.8	25118.3	26037.6	23535.6	28166.7	21590.7	22513.1	14905.8	22105.4	19024.5	20489	19217.8	15268.1	17736.4	17178.3	15356.6	17972.4	Sugar
M198T389	2474.52	1634.05	2287.31	2090.75	1142.46	2127.73	1146.5	2134.26	2275.73	1066.93	1251.74	2667.78	1854.62	2407.01	1990.31	2227.08	1755.3	1240.42	1885.1	1585.18	Sugar
M198T389	2474.52	1634.05	2287.31	2090.75	1142.46	2127.73	1146.5	2134.26	2275.73	1066.93	1251.74	2667.78	1854.62	2407.01	1990.31	2227.08	1755.3	1240.42	1885.1	1585.18	Sugar
M198T389	2474.52	1634.05	2287.31	2090.75	1142.46	2127.73	1146.5	2134.26	2275.73	1066.93	1251.74	2667.78	1854.62	2407.01	1990.31	2227.08	1755.3	1240.42	1885.1	1585.18	Sugar
M203T303	23009.3	37741.4	42105.6	32551.2	37435.6	35878.7	35427.3	19586.4	28508.2	31074.6	58825.9	68508.4	59473.8	50357.8	57891.9	63840.7	55166.1	47154.1	40770.2	55069.1	Sugar
M203T303	23009.3	37741.4	42105.6	32551.2	37435.6	35878.7	35427.3	19586.4	28508.2	31074.6	58825.9	68508.4	59473.8	50357.8	57891.9	63840.7	55166.1	47154.1	40770.2	55069.1	Sugar
M203T303	23009.3	37741.4	42105.6	32551.2	37435.6	35878.7	35427.3	19586.4	28508.2	31074.6	58825.9	68508.4	59473.8	50357.8	57891.9	63840.7	55166.1	47154.1	40770.2	55069.1	Sugar
M203T389	3483.73	1634.66	1534.17	1111.65	3660.97	3505.93	2431.33	1708.29	3155.73	2320.34	3002.35	8218.74	3546.68	3336.54	3121.25	3471.39	3942.47	3416.77	3693.53	2921.87	Sugar
M203T389	3483.73	1634.66	1534.17	1111.65	3660.97	3505.93	2431.33	1708.29	3155.73	2320.34	3002.35	8218.74	3546.68	3336.54	3121.25	3471.39	3942.47	3416.77	3693.53	2921.87	Sugar
M203T389	3483.73	1634.66	1534.17	1111.65	3660.97	3505.93	2431.33	1708.29	3155.73	2320.34	3002.35	8218.74	3546.68	3336.54	3121.25	3471.39	3942.47	3416.77	3693.53	2921.87	Sugar
M203T258	371984	453955	432608	486108	419353	480109	446212	463150	398091	421904	129653	164837	144232	187660	142711	181699	148530	173743	139050	172324	Sugar
M203T258	371984	453955	432608	486108	419353	480109	446212	463150	398091	421904	129653	164837	144232	187660	142711	181699	148530	173743	139050	172324	Sugar
M203T258	371984	453955	432608	486108	419353	480109	446212	463150	398091	421904	129653	164837	144232	187660	142711	181699	148530	173743	139050	172324	Sugar
M283T171_1	2712.49	8767.21	11141.9	5444.2	5037.2	4181.08	3574.48	2987.8	1444.78	2998.6	38818.6	28025	45165.4	32130.3	41319.8	37273.5	33726.4	27970.5	28602.3	25018.8	Sugar
M283T171_1	2712.49	8767.21	11141.9	5444.2	5037.2	4181.08	3574.48	2987.8	1444.78	2998.6	38818.6	28025	45165.4	32130.3	41319.8	37273.5	33726.4	27970.5	28602.3	25018.8	Sugar
M283T171_1	2712.49	8767.21	11141.9	5444.2	5037.2	4181.08	3574.48	2987.8	1444.78	2998.6	38818.6	28025	45165.4	32130.3	41319.8	37273.5	33726.4	27970.5	28602.3	25018.8	Sugar
M283T171_1	2712.49	8767.21	11141.9	5444.2	5037.2	4181.08	3574.48	2987.8	1444.78	2998.6	38818.6	28025	45165.4	32130.3	41319.8	37273.5	33726.4	27970.5	28602.3	25018.8	Sugar
M291T381	1215.23	1191.52	1264.58	825.184	1183.98	361.291	1465.45	1593.53	1322.22	1356.75	2874.68	2357.11	2366.15	2250.99	2508.64	2098.43	3251.03	2049.73	3259.25	2467.42	Sugar
M283T171_1	2712.49	8767.21	11141.9	5444.2	5037.2	4181.08	3574.48	2987.8	1444.78	2998.6	38818.6	28025	45165.4	32130.3	41319.8	37273.5	33726.4	27970.5	28602.3	25018.8	Sugar
M343T413	1022.36	2096.54	1460.59	1938.16	835.719	2652.52	4664.36	3018.51	2049.56	1493.17	2222.38	2984.14	3350.08	2828.15	3007.9	2973.78	2871.02	1342.89	2747.96	2737.67	Sugar
M360T414	5932.83	9882.4	9660.56	10373.4	9186.14	6122.63	5995.91	9590.65	11181.7	3260.87	21272	24697.1	20997.8	21520.9	36748.4	31181	32462.2	31595.5	20851.5	17135.4	Sugar
M360T125	13383.5	15253.3	14224.6	15834.5	12764.1	8031.31	15043.3	16246	13219.3	14841.2	5836.75	5129.44	4040.37	4987.31	5724.46	2014.55	6109.9	4880.51	6654.79	4898.66	Sugar
M365T414	49680	20219.2	48175.9	39602.7	43586.8	50751.9	58264.9	17032.9	41286.9	38018.2	118962	115625	112723	123455	128667	108321	120662	103851	118484	97590.1	Sugar
M365T388	213323	236613	243338	231854	187461	233528	230276	225621	231804	166343	144346	127465	167481	246059	170281	504669	151606	482480	139947	107647	Sugar
M365T456	6564.3	4310.95	8270.32	4150.59	4680.32	6946.23	5071.57	5050.97	5953.33	5493.96	7294.64	9615.17	5290.07	8876.9	6803.86	6888.65	5975.2	7260.69	6855.61	9342.09	Sugar
M365T364	1.28682e+06	1.09908e+06	1.17028e+06	1.04039e+06	1.25687e+06	1.17029e+06	1.08381e+06	1.08989e+06	1.38994e+06	1.24192e+06	123069	100430	125996	134646	126073	130373	121602	131251	123854	127410	Sugar
M365T499	7604	11439.3	7435.89	9557.57	4902.58	4127.6	4504.04	4901.02	6346.76	5258.08	7666.8	8386.95	8197.15	8078.79	7491.15	8111.42	7104.99	8530.09	9779.59	9129.18	Sugar
M381T414	22663.9	12599	11220.2	19081.3	20569.7	18910.1	20248.9	19837.6	12828.6	19384.7	57659.2	17273.5	58654.9	55467.5	17729.2	42293.4	66216.3	41957.1	68587.5	41599.2	Sugar
M381T392	37943.2	54707.5	42455.1	52209.4	53510.7	51401.6	52703.3	69055.4	36119	68392.4	175782	143681	227995	142967	202442	142722	180594	127658	107943	131218	Sugar
M381T363	312777	423301	317722	351350	324397	343445	324382	332170	293920	369589	95211.7	161825	98067.4	154752	104361	124073	116859	116309	98611	142411	Sugar
M403T415	3518.13	4470.54	4900.37	6148.42	3580.72	4731.84	5367.83	6528.12	3779.78	5470.64	36760.8	1455.96	2826.76	1935.99	38621.2	1556.08	35513	3766.72	35596	1506.8	Sugar
M198T302	43066.4	40332.5	45350.1	40411.1	44376.5	41370.8	41789.6	39130.9	18002.5	43683.1	44357	24527.4	48271.5	24479.1	47380	53268.4	49718.1	55034.1	49726.8	24049.8	Sugar
M198T254	20114.7	29162.6	20107	25011.8	25118.3	26037.6	23535.6	28166.7	21590.7	22513.1	14905.8	22105.4	19024.5	20489	19217.8	15268.1	17736.4	17178.3	15356.6	17972.4	Sugar
M198T389	2474.52	1634.05	2287.31	2090.75	1142.46	2127.73	1146.5	2134.26	2275.73	1066.93	1251.74	2667.78	1854.62	2407.01	1990.31	2227.08	1755.3	1240.42	1885.1	1585.18	Sugar
M203T303	23009.3	37741.4	42105.6	32551.2	37435.6	35878.7	35427.3	19586.4	28508.2	31074.6	58825.9	68508.4	59473.8	50357.8	57891.9	63840.7	55166.1	47154.1	40770.2	55069.1	Sugar
M203T389	3483.73	1634.66	1534.17	1111.65	3660.97	3505.93	2431.33	1708.29	3155.73	2320.34	3002.35	8218.74	3546.68	3336.54	3121.25	3471.39	3942.47	3416.77	3693.53	2921.87	Sugar
M203T258	371984	453955	432608	486108	419353	480109	446212	463150	398091	421904	129653	164837	144232	187660	142711	181699	148530	173743	139050	172324	Sugar
M284T342	866.668	1026.22	761.115	978.711	930.91	880.268	1008.33	1299.82	1127.39	992.067	1110.29	1144.31	1539.05	330.783	1124.8	1135.51	891.841	424.788	1342.94	523.64	Sugar
M448T324	29.6915	262.768	0	0	0	39.8433	67.1003	102.998	27.678	37.9084	211.864	331.392	298.626	229.886	307.009	374.685	277.283	382.711	359.595	356.325	Sugar
M284T342	866.668	1026.22	761.115	978.711	930.91	880.268	1008.33	1299.82	1127.39	992.067	1110.29	1144.31	1539.05	330.783	1124.8	1135.51	891.841	424.788	1342.94	523.64	Sugar
M495T304	2716.25	2369.84	3042.22	3360.17	2845.7	2327.6	2707.36	3225.17	2845.48	1856.53	2829.16	3107.35	2894.26	2986.66	2969.84	2839.59	2650.41	2921.71	2747.31	3055.93	Terpenoid
M523T296	2016.7	1779.31	2144.83	2422.9	2733.61	1752.23	1930.93	2405.98	2811.38	1756.3	2731.74	3536.55	3395.17	4375.62	3507	3534.95	3335.73	3280.64	3594.44	3679.2	Terpenoid
M273T190	12472.2	17077.3	11612.3	11042.4	16030.1	12386.4	20862.6	21211.1	14106	12278.7	7277.34	3348.67	5747.38	8815.35	8220.12	8559.86	9044.61	12878.6	16112	13857.1	Terpenoid
M273T44	13226.8	19338.8	16738.9	18932.3	15616.7	16524.4	26838.2	14387.5	18319	17925.6	87591.2	53523.5	72114.2	56173.7	70976.4	62320.2	64130.6	51924.1	60771	60098	Terpenoid
M273T65	29281.9	37294.3	33918.3	19796.5	21327.5	41684.2	40704.8	40597.8	29631.4	12721.7	72615.7	79278.8	72154.1	60446.2	28555.4	37675.7	78773.2	79463.8	75064.5	45794.3	Terpenoid
M290T45	5224.02	9888.77	6361.34	8206.1	4913.5	8694.65	8852.12	8442.23	6506.19	8749.56	5229.9	8136.54	1479.2	3993.38	6056.08	7838.85	7267.96	8689.17	7431.41	7420.05	Terpenoid
M437T343	2311.12	2257.4	2338.8	2113.18	1931.04	2086.03	2254.64	2405.26	2417.38	2221.7	6568.07	7008.64	6662.62	6214.06	8600.98	6391.31	6511.44	6627.93	6861.89	6487.89	Terpenoid
M249T347	4532.36	5452.01	2836.83	5779.17	3083.84	6523.11	5194.33	5385.6	4389.54	6379.74	5384.68	3542.16	5717.35	3343.04	5831.88	3879.35	5870.39	3531.95	5867.22	3291.68	Terpenoid
M281T153	10813.9	11227.9	13626.7	10773.2	10293.9	12670.3	12871.2	11980.1	11827.5	12596.6	39657.4	21968.6	31085.1	19722	35050.3	21582.4	40213	22813.2	32012.5	28060	Terpenoid
M283T90_1	9322.84	9542.43	7776.54	3222.59	8454.39	3566.62	7213.46	9157.55	5835.8	5025.41	38033	25723.9	38202.7	24116.9	39755	34803.9	41185.2	31024.4	35693.7	31393.9	Terpenoid
M318T299	37666.1	54860	64600.5	57745.5	52454.6	49002.1	47959.9	42968.7	41465.6	36904.9	2844.21	5292.54	3337.72	2749.79	2609.3	2261.15	2766.32	2074.86	5438.47	5694.1	Terpenoid
M323T349	7115.24	7391.16	6911.44	8717.76	6128.32	9038.76	7488.34	6954.81	6065.96	7004.56	165876	230713	180858	229109	183359	248699	194430	232355	178809	238889	Terpenoid
M339T299	1840.37	2539.53	4247.97	1468.29	2113.47	3600.86	1426.12	2611.79	789.999	3066.89	2262.46	2617.12	2115.98	3000.78	3550.67	4345.34	2836.98	4392.58	1658.44	4425.67	Terpenoid
M261T31	6688.79	4446.45	8584.15	3600.21	2843.69	1793.9	3427.97	1627.25	8099.21	3263.92	18659.2	30101.3	25414.6	32759.5	25801.1	34551.8	5504.11	37410.8	22467.4	34822.9	Terpenoid
M243T42_2	4926.9	8720.76	3273.06	5197.24	4627.63	8559.61	9179.01	5284.32	6108.25	3705.39	8851.82	11370.3	7788.15	16531.7	8561.75	17085.6	12364.9	10275.5	10982.1	9673.04	Terpenoid
M243T145	3131.85	2952.26	2632.34	2955.72	2744.44	2855.24	2678.75	3969.94	2909.66	3040.55	4199.31	5382.22	1151.57	5392.75	3234.66	5108.86	2796.85	5838.5	4007.68	5046.68	Terpenoid
M86T269	10422.1	8968.88	9472.28	9901.33	9483.73	9956.43	10291.1	12123.5	10741.2	9257.01	92579.6	71092.9	88633.7	72191.2	93502	82055.7	95703.7	77785.5	90971.2	85865.6	Terpenoid
M184T512	1513.25	1647.61	973.431	666.112	264.83	736.099	1482.56	2931.28	616.252	3241.43	980.465	1340.71	1383.91	1625.67	2139.31	2779.76	1041.88	1369.7	2946.25	3184.44	Terpenoid
M251T339	11488.1	6216.56	2103.82	12583.1	6535.05	14624.9	13685.9	14963	6555.2	14115.5	3671.39	2489.61	3329.22	2859.02	2901.11	2588.39	3020.98	2735.98	2929.3	2844.32	Terpenoid
M400T139	2452.65	2283.45	2374.03	2504.89	2236.84	2291.06	1106.67	1856.39	2403.76	2397.19	5797.21	976.015	6716.01	7099.42	6216.47	6450.53	6069.9	6110.77	6063.53	5858.35	Terpenoid
M400T139	2452.65	2283.45	2374.03	2504.89	2236.84	2291.06	1106.67	1856.39	2403.76	2397.19	5797.21	976.015	6716.01	7099.42	6216.47	6450.53	6069.9	6110.77	6063.53	5858.35	Terpenoid
M261T31	6688.79	4446.45	8584.15	3600.21	2843.69	1793.9	3427.97	1627.25	8099.21	3263.92	18659.2	30101.3	25414.6	32759.5	25801.1	34551.8	5504.11	37410.8	22467.4	34822.9	Terpenoid
M261T31	6688.79	4446.45	8584.15	3600.21	2843.69	1793.9	3427.97	1627.25	8099.21	3263.92	18659.2	30101.3	25414.6	32759.5	25801.1	34551.8	5504.11	37410.8	22467.4	34822.9	Terpenoid
M261T31	6688.79	4446.45	8584.15	3600.21	2843.69	1793.9	3427.97	1627.25	8099.21	3263.92	18659.2	30101.3	25414.6	32759.5	25801.1	34551.8	5504.11	37410.8	22467.4	34822.9	Terpenoid
M519T318	2600.42	2840.91	2942.03	2713.47	3201.99	3298.12	2651.58	2167.92	3196.03	2106.7	2130	2367.03	3250.4	2552	2343.18	2809.02	2365.09	4162.64	2369.2	2616.5	Terpenoid
M541T243	5173.63	12568.7	4053.56	15311.1	5143.14	11618.8	11357.4	15865.5	5719.63	12833.4	9824.59	4638.14	6074.05	4556.49	7232.13	3171.41	4941.24	3506.13	4691.46	2279.87	Terpenoid
M557T138	65104.8	64774.2	28115.4	72644.2	17206.5	82766.7	58521.7	83094.9	43044.5	40547.8	1039.14	4274.32	356.567	3914.92	3944	3616.94	1618.34	3947.52	3728.42	3706.67	Terpenoid
M219T28	270055	288976	210089	188091	273140	285050	230497	162527	142445	270388	153434	100019	142267	111015	133126	112145	191800	152391	172525	211361	Terpenoid
M219T28	270055	288976	210089	188091	273140	285050	230497	162527	142445	270388	153434	100019	142267	111015	133126	112145	191800	152391	172525	211361	Terpenoid
M241T77	22395.9	44211.9	50388.6	97868.4	27649	93416.8	37382.6	80298	25975.5	33291.6	5349.11	7310.61	5509.83	7817.36	5030.95	7321.93	5715.98	7970.85	5874.33	6670.49	Terpenoid
M241T77	22395.9	44211.9	50388.6	97868.4	27649	93416.8	37382.6	80298	25975.5	33291.6	5349.11	7310.61	5509.83	7817.36	5030.95	7321.93	5715.98	7970.85	5874.33	6670.49	Terpenoid
M243T42_2	4926.9	8720.76	3273.06	5197.24	4627.63	8559.61	9179.01	5284.32	6108.25	3705.39	8851.82	11370.3	7788.15	16531.7	8561.75	17085.6	12364.9	10275.5	10982.1	9673.04	Terpenoid
M243T42_2	4926.9	8720.76	3273.06	5197.24	4627.63	8559.61	9179.01	5284.32	6108.25	3705.39	8851.82	11370.3	7788.15	16531.7	8561.75	17085.6	12364.9	10275.5	10982.1	9673.04	Terpenoid
M243T145	3131.85	2952.26	2632.34	2955.72	2744.44	2855.24	2678.75	3969.94	2909.66	3040.55	4199.31	5382.22	1151.57	5392.75	3234.66	5108.86	2796.85	5838.5	4007.68	5046.68	Terpenoid
M243T145	3131.85	2952.26	2632.34	2955.72	2744.44	2855.24	2678.75	3969.94	2909.66	3040.55	4199.31	5382.22	1151.57	5392.75	3234.66	5108.86	2796.85	5838.5	4007.68	5046.68	Terpenoid
M257T199	1850.65	1911.07	2347.11	1702.9	2608.88	1721.8	1948.3	2802.04	2057.53	1460.6	3369.26	3213.54	3027.32	3606.69	2613.81	3976.62	4012.94	5037.99	3962.86	4371.66	Terpenoid
M257T199	1850.65	1911.07	2347.11	1702.9	2608.88	1721.8	1948.3	2802.04	2057.53	1460.6	3369.26	3213.54	3027.32	3606.69	2613.81	3976.62	4012.94	5037.99	3962.86	4371.66	Terpenoid
M259T173	2304.7	2182.67	2192.4	717.339	2771.17	2189.84	2595.4	2387.59	2114.11	2308.04	9356.45	6954.54	10541.3	10806.4	6485.69	11430.3	2800.14	7877.94	9894.43	2914.81	Terpenoid
M259T42	2602.93	5311.12	11865.4	4506.73	8135.95	3863.37	7876.49	7017.58	2575.87	7849.88	9026.75	9552.74	17456.5	9707.33	13697.7	20421.8	16693.3	12743.7	16038	17815.1	Terpenoid
M261T31	6688.79	4446.45	8584.15	3600.21	2843.69	1793.9	3427.97	1627.25	8099.21	3263.92	18659.2	30101.3	25414.6	32759.5	25801.1	34551.8	5504.11	37410.8	22467.4	34822.9	Terpenoid
M261T31	6688.79	4446.45	8584.15	3600.21	2843.69	1793.9	3427.97	1627.25	8099.21	3263.92	18659.2	30101.3	25414.6	32759.5	25801.1	34551.8	5504.11	37410.8	22467.4	34822.9	Terpenoid
M261T31	6688.79	4446.45	8584.15	3600.21	2843.69	1793.9	3427.97	1627.25	8099.21	3263.92	18659.2	30101.3	25414.6	32759.5	25801.1	34551.8	5504.11	37410.8	22467.4	34822.9	Terpenoid
M261T31	6688.79	4446.45	8584.15	3600.21	2843.69	1793.9	3427.97	1627.25	8099.21	3263.92	18659.2	30101.3	25414.6	32759.5	25801.1	34551.8	5504.11	37410.8	22467.4	34822.9	Terpenoid
M275T42	9026.92	4416.47	8416.64	7666.61	2327.91	2747.43	8498.43	8009.65	7837.37	8439.8	10972.8	14135.5	11375.6	9602.78	10924.7	11482.8	11210.8	11896.2	10966.2	10339.4	Terpenoid
M285T199	8610.7	8536.2	8585.59	6569.92	7540.25	8085.43	1713.93	7950.35	9547.92	8790.04	21421.4	12799.2	17967.2	13683	18099.2	13870.3	20719.4	14865.9	23327.7	15110.2	Terpenoid
M285T199	8610.7	8536.2	8585.59	6569.92	7540.25	8085.43	1713.93	7950.35	9547.92	8790.04	21421.4	12799.2	17967.2	13683	18099.2	13870.3	20719.4	14865.9	23327.7	15110.2	Terpenoid
M321T379	2688.73	2605.92	2491.29	1146.1	982.91	1390.55	1507.62	2325.34	2435.6	2458.14	2898.16	4305.59	1908.04	4081.17	2149.23	4570.14	4263.47	3384.2	3099.3	5168.91	Terpenoid
M133T162	15934	47860.2	26482.4	21376.6	31773.6	45349.5	42572.4	26060.2	53706.1	22873.8	29289.5	36370.2	29415.3	43891	9806.32	34886.3	36335.2	11497.3	12444.5	7415.33	Terpenoid
M133T41	12161.6	5751.48	13035.5	2497.75	10640.3	10332.6	11345.7	5364.49	11528.9	6733.11	27337.7	34770.5	25347.1	24092.8	41512.6	35211.9	37981	50554.3	33573.6	48073.9	Terpenoid
M151T161	22127.4	37279.2	5231.72	4943.72	13486.9	39132.4	42176	42314.6	19768.6	7097.77	9969.01	11283.5	12215.5	10180.4	7588.81	37644.7	7287.31	37987.9	10918.7	36435.9	Terpenoid
M151T41	6627.53	3861.83	5150.26	30937	28799.9	32070	31593	8221.65	2058.33	5058.72	17803.2	25845.8	14234.6	26867	19312.2	14956.4	17928.5	17626.7	19845.2	24195.9	Terpenoid
M168T169	82417.4	39292.6	85545.6	43745.8	87586.3	58543.7	62084.9	62631.2	88643.1	61443.4	7088.7	2346.58	2687.23	3616.09	1443.04	3705.92	8058.89	3488.94	7498.35	6626.63	Terpenoid
M173T38	11848.1	1283.27	13075.6	11340.1	11231	10148.7	10483	10949.5	1179.93	11094	27429.5	12587.6	8604.04	11996.1	5647.68	8794.09	8712.9	10357	2023.54	8223	Terpenoid
M137T22	39567.3	32989.5	37223.6	36225.9	41396.5	42653.4	42406.3	43163.2	40281.2	38101.5	51800.2	43929.4	62674.2	46216.3	65239.3	32737.3	61355.3	52571.8	57080.2	40655.1	Terpenoid
M167T110	16309	17350.2	15869.9	16241.8	14760	16141.2	16894.9	16839.8	15957.3	16518.7	17575	24793.2	19157.7	27373.9	19300.7	27292.9	20167.6	27924.1	18575.9	24596.2	Terpenoid
M375T377	1572.14	2963.89	2505.36	232.315	3659.24	1657.66	2536.64	2918.54	3331.62	2755.32	3410.07	2130.6	18430.7	1094.05	8240.86	1004.08	7403.1	27243.5	20291.1	1760.57	Terpenoid
M408T170	1377.56	3527.91	3381.55	2181.48	2762.71	2524.98	2770.61	2946.13	4008.92	2207.71	8175.98	12935.6	7155.83	11428.5	8576.5	10099.7	8086.67	11019.9	8166.05	11409.4	Terpenoid
M413T218	29066.3	28590	31656.7	28621.2	29700.1	357.607	23566	19974.3	28090.8	22279.5	13387.2	24570.9	24013.4	12598.2	34553.5	10375.1	15442.2	8799.47	32475.9	16530	Terpenoid
M133T162	15934	47860.2	26482.4	21376.6	31773.6	45349.5	42572.4	26060.2	53706.1	22873.8	29289.5	36370.2	29415.3	43891	9806.32	34886.3	36335.2	11497.3	12444.5	7415.33	Terpenoid
M133T162	15934	47860.2	26482.4	21376.6	31773.6	45349.5	42572.4	26060.2	53706.1	22873.8	29289.5	36370.2	29415.3	43891	9806.32	34886.3	36335.2	11497.3	12444.5	7415.33	Terpenoid
M133T41	12161.6	5751.48	13035.5	2497.75	10640.3	10332.6	11345.7	5364.49	11528.9	6733.11	27337.7	34770.5	25347.1	24092.8	41512.6	35211.9	37981	50554.3	33573.6	48073.9	Terpenoid
M133T41	12161.6	5751.48	13035.5	2497.75	10640.3	10332.6	11345.7	5364.49	11528.9	6733.11	27337.7	34770.5	25347.1	24092.8	41512.6	35211.9	37981	50554.3	33573.6	48073.9	Terpenoid
M137T22	39567.3	32989.5	37223.6	36225.9	41396.5	42653.4	42406.3	43163.2	40281.2	38101.5	51800.2	43929.4	62674.2	46216.3	65239.3	32737.3	61355.3	52571.8	57080.2	40655.1	Terpenoid
M151T161	22127.4	37279.2	5231.72	4943.72	13486.9	39132.4	42176	42314.6	19768.6	7097.77	9969.01	11283.5	12215.5	10180.4	7588.81	37644.7	7287.31	37987.9	10918.7	36435.9	Terpenoid
M151T161	22127.4	37279.2	5231.72	4943.72	13486.9	39132.4	42176	42314.6	19768.6	7097.77	9969.01	11283.5	12215.5	10180.4	7588.81	37644.7	7287.31	37987.9	10918.7	36435.9	Terpenoid
M151T41	6627.53	3861.83	5150.26	30937	28799.9	32070	31593	8221.65	2058.33	5058.72	17803.2	25845.8	14234.6	26867	19312.2	14956.4	17928.5	17626.7	19845.2	24195.9	Terpenoid
M151T41	6627.53	3861.83	5150.26	30937	28799.9	32070	31593	8221.65	2058.33	5058.72	17803.2	25845.8	14234.6	26867	19312.2	14956.4	17928.5	17626.7	19845.2	24195.9	Terpenoid
M168T169	82417.4	39292.6	85545.6	43745.8	87586.3	58543.7	62084.9	62631.2	88643.1	61443.4	7088.7	2346.58	2687.23	3616.09	1443.04	3705.92	8058.89	3488.94	7498.35	6626.63	Terpenoid
M168T169	82417.4	39292.6	85545.6	43745.8	87586.3	58543.7	62084.9	62631.2	88643.1	61443.4	7088.7	2346.58	2687.23	3616.09	1443.04	3705.92	8058.89	3488.94	7498.35	6626.63	Terpenoid
M173T38	11848.1	1283.27	13075.6	11340.1	11231	10148.7	10483	10949.5	1179.93	11094	27429.5	12587.6	8604.04	11996.1	5647.68	8794.09	8712.9	10357	2023.54	8223	Terpenoid
M173T38	11848.1	1283.27	13075.6	11340.1	11231	10148.7	10483	10949.5	1179.93	11094	27429.5	12587.6	8604.04	11996.1	5647.68	8794.09	8712.9	10357	2023.54	8223	Terpenoid
M377T428	2073.48	696.393	1390.1	1440.53	1044.6	2062.74	1486.05	1472.73	816.101	1317.85	3407.12	2849.21	2499.64	2824.24	2943.84	3334.42	2383.22	2958.77	2924.02	3576.05	Terpenoid
M377T217	14408	11569.4	10464.8	12577.2	16893.8	12076.9	12044.5	11366.2	10595.6	11277.9	14717.3	24717.1	12893.6	21479.2	17253.5	23570.6	15665.5	21757.8	15705.7	15730.8	Terpenoid
M381T156	3813.98	1900.65	7137.06	2137.37	1215.48	4455.18	4444.79	4255.38	2120.58	6577.92	639.194	4207.12	4032.18	4067.96	4047.48	2431.72	5413.44	4202.22	5458.37	3875.65	Terpenoid
M397T375	310183	322035	330312	324601	315282	299422	307578	303476	315381	300333	52169.8	16915.5	52241.5	34879.2	45721.6	32798.2	28334.5	19383.5	53370.4	23998.2	Terpenoid
M397T223	1826.5	4951.19	4897.51	4557.56	4292.66	3590.41	4239.6	4160.94	3738.02	4096.25	1328.81	1386.24	1875.67	1374.44	1640	1331.94	1624.89	1265.26	1560.46	1163.23	Terpenoid
M397T223	1826.5	4951.19	4897.51	4557.56	4292.66	3590.41	4239.6	4160.94	3738.02	4096.25	1328.81	1386.24	1875.67	1374.44	1640	1331.94	1624.89	1265.26	1560.46	1163.23	Terpenoid
M399T301	26056	42846.5	59090.6	40337.7	56505.7	43448.2	39474.3	26164.2	54899.3	25440.7	17240.2	7478.02	12779.5	7277.56	11270.5	7503.85	12965	7723.21	14426.1	7884.8	Terpenoid
M399T255	9919.91	799.415	12039	12058.6	11674.4	9772.19	10625.4	10887.8	10514.9	9185.14	255891	142542	297388	127528	285628	142960	258170	136306	242505	129485	Terpenoid
M399T225	9000.91	9990.97	6963.69	11309.5	2079.18	7886.36	8770.17	10043.3	8550.92	7726.59	4987.18	4643.6	6258.06	4254.71	6886.12	3954.6	5837.53	3510.64	4405.94	2998.63	Terpenoid
M413T398	1706.96	1855.05	1561.91	1743.17	1489.75	1602.32	1521.42	1742.14	1582.73	1886.69	6655.18	6544.03	6572.96	6561.44	7259.62	6037.02	11585.3	5766.71	6347.77	5766.63	Terpenoid
M413T398	1706.96	1855.05	1561.91	1743.17	1489.75	1602.32	1521.42	1742.14	1582.73	1886.69	6655.18	6544.03	6572.96	6561.44	7259.62	6037.02	11585.3	5766.71	6347.77	5766.63	Terpenoid
M453T254	3220.71	2981.08	2992.4	2449.14	3108.58	2793.65	2849.83	3042.85	3338.45	2397.71	4017.07	1132.24	3655.05	1492.64	5222.84	1772.97	3590.81	1997.24	4103.85	2038.94	Terpenoid
M406T136	2711.93	17342.3	5756.76	15426.5	5591.83	16916.5	13706.3	16479.1	5358.51	15769.9	3095.66	5110.51	3675.13	4872.94	3030.94	4964.82	3533.79	5156.83	3531.79	4175.84	Terpenoid
M411T197	9054.27	15069.9	14467.1	13934.6	9584.15	12658.7	10463.5	10115.5	10019.3	8444.03	1044.91	700.671	1799.92	1555.77	2113.06	1384.6	1890.39	1408.29	1652.03	1669.69	Terpenoid
M427T131	1195.49	2220	2746.09	5427.69	164.245	3234.56	3143.37	5700.75	1386.99	3773.24	1597.66	1638.17	1919.37	1680.76	1856.7	1836.86	1968.39	1503.17	1757.58	1667.1	Terpenoid
M427T390	3601.01	3631.24	4408.39	3640.78	3800.63	3095.23	3495.55	3722.44	3580.37	3165.08	1724.88	1065.96	1592.51	1021.11	2139.24	962.654	1639.85	1377.58	1502.96	1140.97	Terpenoid
M137T22	39567.3	32989.5	37223.6	36225.9	41396.5	42653.4	42406.3	43163.2	40281.2	38101.5	51800.2	43929.4	62674.2	46216.3	65239.3	32737.3	61355.3	52571.8	57080.2	40655.1	Terpenoid
M147T173	8695.72	6482.19	12493.1	13068.8	6728.52	5684.71	15152.3	5469.75	8643.12	13860.6	7541.74	3590.29	7753.53	3335.73	6135.86	22194.7	9262.19	17632.7	6434.24	16366.5	Terpenoid
M165T174	25331.7	21198	24296.4	19921.2	20727.2	24588	23198.7	20756.1	25423.8	18328.5	13644.8	26413.6	19585.9	17957.1	18520.5	18796.7	20735	19719.5	36169.7	19061.1	Terpenoid
M183T173	6855.94	6740.49	635.286	6901.89	7292.15	4283.74	3810.61	4858.97	7924.8	3197.51	5464.37	6552.27	6530.63	2069.63	5890.27	6244.42	6236.72	1909.9	1653.46	6338.99	Terpenoid
M205T312	4134.6	3195.3	3604.88	2673.89	3307.55	3333.9	3150.52	3054.47	3126.25	2751.97	2685.08	1345.68	2349.39	1040.46	1147.46	2912.56	786.753	1210.21	3676.6	1398.28	Terpenoid
M137T22	39567.3	32989.5	37223.6	36225.9	41396.5	42653.4	42406.3	43163.2	40281.2	38101.5	51800.2	43929.4	62674.2	46216.3	65239.3	32737.3	61355.3	52571.8	57080.2	40655.1	Terpenoid
M267T189	3375.45	3837.99	2803.07	3483.66	3280.1	1783.43	3585.96	4240.03	2621.59	4081.41	7586.35	9639.46	8514.08	9130.29	8172.91	8854.3	7672.95	4376.99	8634.65	9383.46	Terpenoid
M285T170	4129.79	5653.24	5299.49	4572.3	5361.04	5003.77	4474.49	5264.69	4577.72	4027.09	5563.79	12842.1	8695.52	21757.3	9512.38	11668.8	27369.5	10213.2	11202.3	9894.34	Terpenoid
M303T169	5834.88	2263.31	5744.35	4146.74	4993.31	3519.5	3350.19	2822.55	1113.05	3557.33	5645.45	14318.1	7851.66	15186.6	11996.2	8649.24	10879.2	14302.2	6789.54	13038.1	Terpenoid
M303T189	360.122	2030.44	3886.99	4059.72	4050.52	4322.62	1658.39	3535.08	3757.94	4387.99	7801.38	22787.5	7946.89	18576.4	11099	10973.4	7568.29	11399	8337.98	7287.82	Terpenoid
M333T174	10531.8	39056.6	20000.2	38616.3	10939.1	37307.1	40196.3	38448	11270.2	35250.8	9890.33	14781.7	12862.6	32815.4	12617.2	16050.3	10680.1	13911.2	10722	13636.2	Terpenoid
M355T32	15011.5	4786.88	16975.1	4540.59	15327.4	8107.25	6302.78	9804.93	14776.2	7346.12	11930.6	27328.6	10022.6	29086.1	11565.4	40979.7	10901.9	40335.9	11445.3	30752.3	Terpenoid
M355T130	12551.3	11521.5	13761.6	11249.5	13421.5	11030	10512.1	11313	13436	10743	8520.05	7680.11	10473.5	7301.02	9284.84	6388.03	9106.75	5926.12	8085.76	6228.35	Terpenoid
M355T171	11400.9	422.765	10758.8	9516.09	11006.1	9482.42	8956.16	8450.41	9597.22	8763.62	12333.5	10766.7	12742.5	9297.38	848.687	11042.8	1592.84	9775.15	11689.8	10440.8	Terpenoid
M441T216	24387.9	7715.11	15369.1	20122	4204.71	4842.51	15687.3	17191.5	5356.68	23036.3	12889.8	7844.5	13236.8	13503.3	12406.2	11396.6	10927	9939.54	13531.4	10510.2	Terpenoid
M458T197	9048.4	10576.2	7285.58	11407	13792.9	15190.8	8835.4	10080	9745.02	17759.3	8296.89	12706.2	17256.8	8218.55	15134.9	7069.3	9619.03	6412.43	7914.93	6618.25	Terpenoid
M479T314	2277.18	4795.74	962.428	3777.32	2478.16	4659.17	4171.05	1235.15	1672.11	1782.66	3194.6	3442.54	3194.87	4052.08	3598.4	3909.49	3588.36	3670.14	3285.24	3859.81	Terpenoid
M479T215	7886.59	11712.4	10548.9	7148.09	6220.05	5268.24	8260.17	8563.44	8271.37	5833.44	6931.09	5638.3	7266.33	5193.83	7251.31	5911.55	8189.88	5695.99	8654.28	5298.06	Terpenoid
M479T293	2649.44	3298.07	3464.37	3597.91	3125.68	2652.65	2420.93	3105.84	3144.85	2132.04	4034.8	4315.85	4494.81	4159.31	5485.64	4736.43	4385.85	4799.84	4412.48	4243.31	Terpenoid
M479T257	5792.56	4866.15	5382.13	5328.88	5126.08	4898.81	4725.12	5526.71	4805.84	4624.74	5861.87	7601.02	9023.21	7815.84	5592.96	6923.11	6712.93	6941.3	7863.06	7073.67	Terpenoid
M545T198	6569.98	7902	8024.4	7266.8	7044.95	7492.93	6386.2	6800.08	7045.02	7305.19	4050.9	4286.19	4484.45	4052.48	4742.32	3992.42	4479.72	3540.59	4032.22	4368.61	Terpenoid
M562T135	1566.08	1496.88	1561.19	1699.72	1262.4	1409.28	1394.28	1469.51	1317.43	1443.05	1074.98	1655.77	932.152	1588.94	913.25	1299.34	846.526	1226.77	1032.75	1264.2	Terpenoid
M567T43	3925.32	2678.08	3133.57	4746.86	3758.34	5114.18	4911.72	5593.78	4846.57	2130.06	7854.65	11213.5	2372.89	5887.9	9011.03	7123.66	6334.29	6026.46	8028.97	10161.3	Terpenoid
M767T42	191.4	694.577	533.768	548.112	493.88	700.736	585.438	974.361	1023.87	501.368	3455.63	3828.28	3902.62	3358.48	4359.67	4144.41	3960.44	3146.19	3890.91	1145.47	Terpenoid
M287T169	4977.35	4075.37	4741.85	4342.04	4108.17	4150.2	4621.35	4756.68	4730.09	4602.62	12314.3	13642.2	12387.9	13419.7	12659.2	14717.5	1691.4	567.391	12075.6	3484.47	Terpenoid
M299T41	7161	4880.12	12322.1	9400.61	7416.02	3777.54	1134.45	10223.2	7168.9	2053.75	14717.6	27213.9	19601.5	29821.7	18085.6	36091.9	13649.2	33696.2	15629.4	25476.3	Terpenoid
M317T43	5139.57	6437.86	4383.58	9254.69	4490.38	7866.34	6835.05	5607.56	4377.09	5502.36	16985.8	41324	19835.4	19017.5	19592.9	28263.7	15177.7	28883.4	19501.4	23382.2	Terpenoid
M317T153	2152.28	1771.47	5598.55	5746.54	5414.31	6254.66	5391.47	6426.58	5881.89	6006.99	11077	4487.76	10843	14081	9877.11	10807.3	11157.4	13920.5	11498.1	13299	Terpenoid
M339T151	5066.84	6273.9	7663.11	6101.89	4918.02	5478.36	5598.16	5888.26	510.56	6149.35	2077.18	4910.25	3944.68	4624.4	3991.5	3816.98	4109	4185.36	1417.03	3618.78	Terpenoid
M609T35_1	3458.44	1206.26	3770.03	3730.05	2479.59	3544.88	3241.64	3614.26	3552.97	3920.58	9352.57	15405.9	8481.19	6474.95	10366.2	6647.27	11429.4	12685.9	11435	8465.56	Terpenoid
M267T189	3375.45	3837.99	2803.07	3483.66	3280.1	1783.43	3585.96	4240.03	2621.59	4081.41	7586.35	9639.46	8514.08	9130.29	8172.91	8854.3	7672.95	4376.99	8634.65	9383.46	Terpenoid
M267T189	3375.45	3837.99	2803.07	3483.66	3280.1	1783.43	3585.96	4240.03	2621.59	4081.41	7586.35	9639.46	8514.08	9130.29	8172.91	8854.3	7672.95	4376.99	8634.65	9383.46	Terpenoid
M267T189	3375.45	3837.99	2803.07	3483.66	3280.1	1783.43	3585.96	4240.03	2621.59	4081.41	7586.35	9639.46	8514.08	9130.29	8172.91	8854.3	7672.95	4376.99	8634.65	9383.46	Terpenoid
M267T189	3375.45	3837.99	2803.07	3483.66	3280.1	1783.43	3585.96	4240.03	2621.59	4081.41	7586.35	9639.46	8514.08	9130.29	8172.91	8854.3	7672.95	4376.99	8634.65	9383.46	Terpenoid
M267T189	3375.45	3837.99	2803.07	3483.66	3280.1	1783.43	3585.96	4240.03	2621.59	4081.41	7586.35	9639.46	8514.08	9130.29	8172.91	8854.3	7672.95	4376.99	8634.65	9383.46	Terpenoid
M283T171_2	3904.52	3734.3	3895.53	504.216	3663.93	3592.06	3954.97	4464.27	3435.31	3985.06	9557.14	12739.3	9551.54	12724.5	11452.3	13190.4	9631.48	11896.8	6550.51	8340.53	Terpenoid
M285T170	4129.79	5653.24	5299.49	4572.3	5361.04	5003.77	4474.49	5264.69	4577.72	4027.09	5563.79	12842.1	8695.52	21757.3	9512.38	11668.8	27369.5	10213.2	11202.3	9894.34	Terpenoid
M285T170	4129.79	5653.24	5299.49	4572.3	5361.04	5003.77	4474.49	5264.69	4577.72	4027.09	5563.79	12842.1	8695.52	21757.3	9512.38	11668.8	27369.5	10213.2	11202.3	9894.34	Terpenoid
M285T170	4129.79	5653.24	5299.49	4572.3	5361.04	5003.77	4474.49	5264.69	4577.72	4027.09	5563.79	12842.1	8695.52	21757.3	9512.38	11668.8	27369.5	10213.2	11202.3	9894.34	Terpenoid
M285T170	4129.79	5653.24	5299.49	4572.3	5361.04	5003.77	4474.49	5264.69	4577.72	4027.09	5563.79	12842.1	8695.52	21757.3	9512.38	11668.8	27369.5	10213.2	11202.3	9894.34	Terpenoid
M285T170	4129.79	5653.24	5299.49	4572.3	5361.04	5003.77	4474.49	5264.69	4577.72	4027.09	5563.79	12842.1	8695.52	21757.3	9512.38	11668.8	27369.5	10213.2	11202.3	9894.34	Terpenoid
M287T169	4977.35	4075.37	4741.85	4342.04	4108.17	4150.2	4621.35	4756.68	4730.09	4602.62	12314.3	13642.2	12387.9	13419.7	12659.2	14717.5	1691.4	567.391	12075.6	3484.47	Terpenoid
M287T169	4977.35	4075.37	4741.85	4342.04	4108.17	4150.2	4621.35	4756.68	4730.09	4602.62	12314.3	13642.2	12387.9	13419.7	12659.2	14717.5	1691.4	567.391	12075.6	3484.47	Terpenoid
M291T171	147.832	166.606	107.03	249.495	78.3905	178.35	114.753	168.21	197.864	153.764	322.123	405.332	54.6109	324.021	280.819	1058.61	333.407	223.222	0	58.9025	Terpenoid
M291T171	147.832	166.606	107.03	249.495	78.3905	178.35	114.753	168.21	197.864	153.764	322.123	405.332	54.6109	324.021	280.819	1058.61	333.407	223.222	0	58.9025	Terpenoid
M297T34	4665.6	6949.92	6321.43	24436.9	4876.2	26343.8	25386.8	5412.57	6016.96	4455.46	8688.36	28810.3	15385.5	29304.9	6358.66	30437.6	11034.4	29310.9	9540.97	27430.2	Terpenoid
M297T197	2389.04	1814.42	1643.02	1958.35	1536.51	1035.38	1559	2227.72	2210.61	7016.34	4080.82	5804.07	4115.95	5043.16	4415.43	4566.35	4248.34	5783.98	4230.83	7130.74	Terpenoid
M301T189	5466.15	4610.63	4480.85	4676.27	4444.16	4698.51	4570.11	5010.76	4898.32	4809.33	8066.68	12307	7817.41	11712.6	8970.16	11984.3	8380.14	12652.3	8355.72	12220.3	Terpenoid
M303T169	5834.88	2263.31	5744.35	4146.74	4993.31	3519.5	3350.19	2822.55	1113.05	3557.33	5645.45	14318.1	7851.66	15186.6	11996.2	8649.24	10879.2	14302.2	6789.54	13038.1	Terpenoid
M303T169	5834.88	2263.31	5744.35	4146.74	4993.31	3519.5	3350.19	2822.55	1113.05	3557.33	5645.45	14318.1	7851.66	15186.6	11996.2	8649.24	10879.2	14302.2	6789.54	13038.1	Terpenoid
M303T169	5834.88	2263.31	5744.35	4146.74	4993.31	3519.5	3350.19	2822.55	1113.05	3557.33	5645.45	14318.1	7851.66	15186.6	11996.2	8649.24	10879.2	14302.2	6789.54	13038.1	Terpenoid
M303T169	5834.88	2263.31	5744.35	4146.74	4993.31	3519.5	3350.19	2822.55	1113.05	3557.33	5645.45	14318.1	7851.66	15186.6	11996.2	8649.24	10879.2	14302.2	6789.54	13038.1	Terpenoid
M303T169	5834.88	2263.31	5744.35	4146.74	4993.31	3519.5	3350.19	2822.55	1113.05	3557.33	5645.45	14318.1	7851.66	15186.6	11996.2	8649.24	10879.2	14302.2	6789.54	13038.1	Terpenoid
M303T189	360.122	2030.44	3886.99	4059.72	4050.52	4322.62	1658.39	3535.08	3757.94	4387.99	7801.38	22787.5	7946.89	18576.4	11099	10973.4	7568.29	11399	8337.98	7287.82	Terpenoid
M303T189	360.122	2030.44	3886.99	4059.72	4050.52	4322.62	1658.39	3535.08	3757.94	4387.99	7801.38	22787.5	7946.89	18576.4	11099	10973.4	7568.29	11399	8337.98	7287.82	Terpenoid
M303T189	360.122	2030.44	3886.99	4059.72	4050.52	4322.62	1658.39	3535.08	3757.94	4387.99	7801.38	22787.5	7946.89	18576.4	11099	10973.4	7568.29	11399	8337.98	7287.82	Terpenoid
M303T189	360.122	2030.44	3886.99	4059.72	4050.52	4322.62	1658.39	3535.08	3757.94	4387.99	7801.38	22787.5	7946.89	18576.4	11099	10973.4	7568.29	11399	8337.98	7287.82	Terpenoid
M303T189	360.122	2030.44	3886.99	4059.72	4050.52	4322.62	1658.39	3535.08	3757.94	4387.99	7801.38	22787.5	7946.89	18576.4	11099	10973.4	7568.29	11399	8337.98	7287.82	Terpenoid
M315T41_1	3944.28	7501.23	12032.5	6286.57	9665.04	8963.16	8187.76	7827.25	9734.75	8193.28	29759.9	52474.2	31603.4	50307.9	34085.6	52710.2	32402.3	48722.8	24588.3	46979.4	Terpenoid
M315T175	1327.25	1080.01	9662.78	13282.6	9825.11	8519.39	11298.4	19240.9	7681.67	9342.68	15147.2	20548.9	46931.9	51926.8	13940.6	19129.4	10831.6	11177.6	43179.8	16573.8	Terpenoid
M315T138	6807.64	5863.55	6258.13	5582.02	6055.69	6352.05	5718.48	6315.58	6518.74	5700.92	23820.9	32290.3	27040.6	29600.4	22406.1	27744.1	21763.2	33265.3	22325	27940	Terpenoid
M315T197	2974.75	2404.22	2442.58	2560.34	2750.66	2912.86	3539.29	9037.13	9552.12	2778.44	5937.9	8219.13	6764.13	7377.15	6554.9	7125.4	4143.51	7330.43	6123.49	6588.83	Terpenoid
M319T170	6085.81	6052.44	694.28	2275.22	8003.09	5420.79	957.51	5907.36	5701.38	6162.52	9640.21	11031.9	8970	17945.1	4212.82	23468.1	7509.3	11844	9584	11469.6	Terpenoid
M319T188	3829.39	3940.44	3453.39	4379.04	4037.49	3840.04	3659.1	468	4078.54	3834.51	15101.3	17045.1	15239.9	16050.4	15780.3	16787	15610.8	5398.37	16270.2	14987	Terpenoid
M331T41	179856	210297	194705	207615	186795	206390	191313	219483	200278	194140	1.39524e+06	1.44191e+06	1.61825e+06	1.44166e+06	1.38931e+06	1.33629e+06	1.32511e+06	1.25232e+06	1.489e+06	1.25654e+06	Terpenoid
M331T41	179856	210297	194705	207615	186795	206390	191313	219483	200278	194140	1.39524e+06	1.44191e+06	1.61825e+06	1.44166e+06	1.38931e+06	1.33629e+06	1.32511e+06	1.25232e+06	1.489e+06	1.25654e+06	Terpenoid
M331T183	41891.3	56727.8	40611	44617.7	39872.6	52880.8	54932.5	49289.1	44387.5	50878.9	67478.9	63031.6	68016	58694.8	61745	61259.5	71687.5	62535.6	70629.5	64719.6	Terpenoid
M331T183	41891.3	56727.8	40611	44617.7	39872.6	52880.8	54932.5	49289.1	44387.5	50878.9	67478.9	63031.6	68016	58694.8	61745	61259.5	71687.5	62535.6	70629.5	64719.6	Terpenoid
M331T153	18926.7	20199.5	16360.3	18209.5	18984.2	18785	19105.6	24096.7	17067.6	19176.4	561858	418145	514258	401122	594272	419731	609084	477881	363425	478863	Terpenoid
M331T153	18926.7	20199.5	16360.3	18209.5	18984.2	18785	19105.6	24096.7	17067.6	19176.4	561858	418145	514258	401122	594272	419731	609084	477881	363425	478863	Terpenoid
M337T32	6255.7	3639.32	7667.84	4155.22	4850.37	3282.75	2904.25	3281.71	6396.1	4058.68	6605.9	18694.5	6730.28	18010.1	6429.95	19289.2	8016.57	21132.9	8036.42	19272.5	Terpenoid
M341T32	3517.22	3980.77	3827.17	2877.44	1532.69	2886.13	2970.29	2806.43	3567.43	869.55	5615.27	2672.05	5527.78	4976.43	3099.37	2890.17	1880.07	3805.19	5668.98	1941.75	Terpenoid
M355T34	23481.3	5491.47	23472.5	21831.3	4317.24	9378.38	4370.91	24416.3	22075.8	22178	34792.4	57083.7	40583.9	65282.7	39414.1	26344.3	36861.7	30665.8	41000.3	37536.5	Terpenoid
M357T172	3831.75	3500.09	3257.68	3476.98	1707.91	2484.93	3470.92	3573.07	2977.09	3843.29	6006.66	1468.35	4454.59	2337.18	5717.65	3052.26	2813.01	6256.03	5148.27	4816.9	Terpenoid
M357T32	3664.9	2412.36	4178.75	790.356	3194.66	1985.49	1956.21	2000.83	3737.06	2131.06	3256.52	2386.02	3407.98	9961.29	1616.01	6707.34	2632.73	5010.36	2853.87	8040.77	Terpenoid
M375T41	4937.54	5252.42	3743.78	2153.76	3036.69	2373.02	3106.8	2539.62	3487.02	1295.53	8187.7	8577.41	9612.45	10141.7	9314.33	9180.85	8864.82	10438	7235.46	9586.29	Terpenoid
M387T307	8114.06	6671.16	7614.8	16168.7	8911.28	7903.33	7755.5	8193.4	9317.04	7075.59	7871.72	5193.23	4893.81	4552.76	12452.9	2904.12	4547.26	11982.2	4698.85	5034.56	Terpenoid
M507T234	3668.86	3851.71	4081.14	3638.29	3619.11	3966.84	3456.42	3447.85	3419.24	4081.15	2593.29	5297.28	4171.15	4625.2	3915.32	4542.72	4561.81	3674.9	3922.46	4623.18	Terpenoid
M241T37	8005.02	4663.99	9537.85	2205.06	2724.04	5978.95	2068.5	5949.65	4942.83	2208.92	7563.92	5227.64	8526.82	11410.7	5385.05	5771.04	7792.26	5392.73	3938.23	8099.73	Terpenoid
M291T171	147.832	166.606	107.03	249.495	78.3905	178.35	114.753	168.21	197.864	153.764	322.123	405.332	54.6109	324.021	280.819	1058.61	333.407	223.222	0	58.9025	Terpenoid
M333T174	10531.8	39056.6	20000.2	38616.3	10939.1	37307.1	40196.3	38448	11270.2	35250.8	9890.33	14781.7	12862.6	32815.4	12617.2	16050.3	10680.1	13911.2	10722	13636.2	Terpenoid
M333T174	10531.8	39056.6	20000.2	38616.3	10939.1	37307.1	40196.3	38448	11270.2	35250.8	9890.33	14781.7	12862.6	32815.4	12617.2	16050.3	10680.1	13911.2	10722	13636.2	Terpenoid
M355T32	15011.5	4786.88	16975.1	4540.59	15327.4	8107.25	6302.78	9804.93	14776.2	7346.12	11930.6	27328.6	10022.6	29086.1	11565.4	40979.7	10901.9	40335.9	11445.3	30752.3	Terpenoid
M355T32	15011.5	4786.88	16975.1	4540.59	15327.4	8107.25	6302.78	9804.93	14776.2	7346.12	11930.6	27328.6	10022.6	29086.1	11565.4	40979.7	10901.9	40335.9	11445.3	30752.3	Terpenoid
M355T130	12551.3	11521.5	13761.6	11249.5	13421.5	11030	10512.1	11313	13436	10743	8520.05	7680.11	10473.5	7301.02	9284.84	6388.03	9106.75	5926.12	8085.76	6228.35	Terpenoid
M355T130	12551.3	11521.5	13761.6	11249.5	13421.5	11030	10512.1	11313	13436	10743	8520.05	7680.11	10473.5	7301.02	9284.84	6388.03	9106.75	5926.12	8085.76	6228.35	Terpenoid
M355T171	11400.9	422.765	10758.8	9516.09	11006.1	9482.42	8956.16	8450.41	9597.22	8763.62	12333.5	10766.7	12742.5	9297.38	848.687	11042.8	1592.84	9775.15	11689.8	10440.8	Terpenoid
M355T171	11400.9	422.765	10758.8	9516.09	11006.1	9482.42	8956.16	8450.41	9597.22	8763.62	12333.5	10766.7	12742.5	9297.38	848.687	11042.8	1592.84	9775.15	11689.8	10440.8	Terpenoid
M363T390	4398.06	7267.79	4745.93	4598.55	4399.02	3267.22	2972.79	3836.42	3619.39	6082.29	3479.5	2413.8	4464.91	2088.01	6290.44	2308.59	3096.71	2343.1	2534.71	2022.33	Terpenoid
M363T376	5104.08	7648.14	15723.3	10579.6	12835.4	4533.17	4495.92	4852.06	11557.6	6515.59	10759.3	15147.9	12475.1	1561.76	11992.1	16859.1	12880	14050.9	12654.5	1222.48	Terpenoid
M363T174	2566.66	4601.62	3544.54	5690.85	2424.37	4719.11	9422.56	7634.09	3963.39	6265.8	7777.77	3541	5010.87	4932.63	4963.06	7247.59	5312.91	5103.69	4363.37	6015.34	Terpenoid
M387T163	5728.89	4685	5731.5	2030.01	5559.52	7198.71	5718.29	5747.46	3691.46	5394.14	8500.35	8834.26	10627.8	8277.31	8765.98	1402.02	8507.28	7369.79	8842.29	8912.31	Terpenoid
M387T307	8114.06	6671.16	7614.8	16168.7	8911.28	7903.33	7755.5	8193.4	9317.04	7075.59	7871.72	5193.23	4893.81	4552.76	12452.9	2904.12	4547.26	11982.2	4698.85	5034.56	Terpenoid
M387T35	81389.2	103170	94944.2	84613.9	76401.9	100403	100760	87993.3	75000.9	91026.5	63425.1	51404.8	74389.8	50426.4	67889.2	50666.9	79801.1	49364.9	62128.3	47059.2	Terpenoid
M403T195	8688.52	7789.43	13432.1	11892.8	9431.88	9687.57	9745.56	9797.91	8118.62	5959.15	12360.2	29663	17424.3	24988.1	16871.8	24266.7	13408.3	21116.1	20502.5	18474.4	Terpenoid
M426T174	4566.55	4845.98	4735.49	4657.91	4394.54	4479.8	4302.61	5012.95	4468.01	4999.56	5344.16	8270.04	5570	8089.59	7991.3	8771.94	5812.89	7925.98	8208.86	7643.08	Terpenoid
M625T276	19340	4616.97	32074.4	11377.7	10241.4	17410.3	8922.49	7289.49	34415.1	16691.8	1493.58	2705.91	2115.13	1159.42	2368.08	2592.12	1002.8	3068.45	2619.52	3077.22	Terpenoid
M247T317	2239.98	2082.03	2515.1	1684.89	3020.83	3058.28	1412.76	2762.93	913.191	2911.08	2921.63	3332	2826.62	3338.97	2827.45	3504.5	1249.45	3079.09	2140.44	3414.11	Terpenoid
M269T317	10902.6	7078.97	8225.9	10022.6	12021.8	10686.3	9588.02	11797.6	10900.5	10074.9	80763.7	51315.5	93707.1	53793.6	75887.5	58303.9	81507.3	62297	88941.6	94038.3	Terpenoid
M275T452	16204.9	18263	32641.3	25615.1	20224.9	18099.1	15256.5	16708.7	17902.6	16165	46291.4	86580.3	90620.4	45698.3	50791.9	82057.8	88855	46680.1	45197.4	43753.2	Terpenoid
M289T252	2055.36	5616.69	4548.31	4063.33	5098.15	4333.36	4015.23	5055.73	3007.17	3342.5	11358.7	2582.77	3623.04	2019.94	2852.45	2872.24	3848.99	3619.69	1554.14	8011.28	Terpenoid
M297T455	1822.8	1263.76	1775.23	1371.44	1128.5	716.2	1376.13	1070.38	720.522	1380.69	2745.54	1249.3	2055.52	1319.93	1528.08	2206.29	1680.13	2008.52	2901.96	1842.48	Terpenoid
M319T350	1604.51	3331.01	3504.23	1714.9	3205.85	1194.64	2930.57	3531.4	1333.61	1696.78	6630.28	12351.7	6665.35	12307.3	7618.3	12406.1	7773.06	12265.1	6703.64	11114.8	Terpenoid
M414T219	6302.56	6867.57	10175.6	9355.04	8851.39	3788.26	6387.85	5169.56	7525.59	7684.71	7486.41	2128.18	11565.7	1820.57	6486.02	1517.24	2461.2	2105.31	5969.96	1525.14	Terpenoid
M400T139	2452.65	2283.45	2374.03	2504.89	2236.84	2291.06	1106.67	1856.39	2403.76	2397.19	5797.21	976.015	6716.01	7099.42	6216.47	6450.53	6069.9	6110.77	6063.53	5858.35	Terpenoid
M693T30	69.4804	33.2394	0	98.7827	59.4398	88.6514	125.445	48.3251	22.3898	99.3059	237.292	1268.4	102.272	1109.54	20.5206	734.424	0	947.095	176.974	778.047	Terpenoid
M219T28	270055	288976	210089	188091	273140	285050	230497	162527	142445	270388	153434	100019	142267	111015	133126	112145	191800	152391	172525	211361	Terpenoid
M241T77	22395.9	44211.9	50388.6	97868.4	27649	93416.8	37382.6	80298	25975.5	33291.6	5349.11	7310.61	5509.83	7817.36	5030.95	7321.93	5715.98	7970.85	5874.33	6670.49	Terpenoid
M243T42_2	4926.9	8720.76	3273.06	5197.24	4627.63	8559.61	9179.01	5284.32	6108.25	3705.39	8851.82	11370.3	7788.15	16531.7	8561.75	17085.6	12364.9	10275.5	10982.1	9673.04	Terpenoid
M243T42_2	4926.9	8720.76	3273.06	5197.24	4627.63	8559.61	9179.01	5284.32	6108.25	3705.39	8851.82	11370.3	7788.15	16531.7	8561.75	17085.6	12364.9	10275.5	10982.1	9673.04	Terpenoid
M243T145	3131.85	2952.26	2632.34	2955.72	2744.44	2855.24	2678.75	3969.94	2909.66	3040.55	4199.31	5382.22	1151.57	5392.75	3234.66	5108.86	2796.85	5838.5	4007.68	5046.68	Terpenoid
M243T145	3131.85	2952.26	2632.34	2955.72	2744.44	2855.24	2678.75	3969.94	2909.66	3040.55	4199.31	5382.22	1151.57	5392.75	3234.66	5108.86	2796.85	5838.5	4007.68	5046.68	Terpenoid
M255T170	9539.04	9359.24	10720.2	10654.6	10985.5	10707.6	10645.8	1452.01	9824.45	10335.5	6393.64	6817.53	5925.71	8899.68	7023.26	11171	14777.7	12955	6482.36	7032.23	Terpenoid
M257T199	1850.65	1911.07	2347.11	1702.9	2608.88	1721.8	1948.3	2802.04	2057.53	1460.6	3369.26	3213.54	3027.32	3606.69	2613.81	3976.62	4012.94	5037.99	3962.86	4371.66	Terpenoid
M257T146	7966.42	10561.1	8350.26	10731.8	8037.99	10515.7	10146.4	10419.2	7790.32	9644.91	7214.51	7910.44	4314.24	8011.03	6912.6	7212.03	7680.26	7448.31	7211.47	4895.97	Terpenoid
M257T176	3015.95	2989.75	2516.25	3059.05	2743.36	3296.25	3353.2	3210.57	2392.97	3530.21	1878.44	10940.7	7033.38	9587.36	3127.39	10364.4	2156.12	2880.52	2129.84	9383.32	Terpenoid
M285T199	8610.7	8536.2	8585.59	6569.92	7540.25	8085.43	1713.93	7950.35	9547.92	8790.04	21421.4	12799.2	17967.2	13683	18099.2	13870.3	20719.4	14865.9	23327.7	15110.2	Terpenoid
M133T162	15934	47860.2	26482.4	21376.6	31773.6	45349.5	42572.4	26060.2	53706.1	22873.8	29289.5	36370.2	29415.3	43891	9806.32	34886.3	36335.2	11497.3	12444.5	7415.33	Terpenoid
M133T41	12161.6	5751.48	13035.5	2497.75	10640.3	10332.6	11345.7	5364.49	11528.9	6733.11	27337.7	34770.5	25347.1	24092.8	41512.6	35211.9	37981	50554.3	33573.6	48073.9	Terpenoid
M137T22	39567.3	32989.5	37223.6	36225.9	41396.5	42653.4	42406.3	43163.2	40281.2	38101.5	51800.2	43929.4	62674.2	46216.3	65239.3	32737.3	61355.3	52571.8	57080.2	40655.1	Terpenoid
M151T161	22127.4	37279.2	5231.72	4943.72	13486.9	39132.4	42176	42314.6	19768.6	7097.77	9969.01	11283.5	12215.5	10180.4	7588.81	37644.7	7287.31	37987.9	10918.7	36435.9	Terpenoid
M151T41	6627.53	3861.83	5150.26	30937	28799.9	32070	31593	8221.65	2058.33	5058.72	17803.2	25845.8	14234.6	26867	19312.2	14956.4	17928.5	17626.7	19845.2	24195.9	Terpenoid
M168T169	82417.4	39292.6	85545.6	43745.8	87586.3	58543.7	62084.9	62631.2	88643.1	61443.4	7088.7	2346.58	2687.23	3616.09	1443.04	3705.92	8058.89	3488.94	7498.35	6626.63	Terpenoid
M173T38	11848.1	1283.27	13075.6	11340.1	11231	10148.7	10483	10949.5	1179.93	11094	27429.5	12587.6	8604.04	11996.1	5647.68	8794.09	8712.9	10357	2023.54	8223	Terpenoid
M174T106	26229	18506.9	24108	16939.9	21116.7	17912.4	18313.3	19591.2	24638.6	18336.2	8537.85	13240.6	8087.02	12645.5	9739.82	11941.7	9638.02	10989.5	3183.4	10149.4	Terpenoid
M174T106	26229	18506.9	24108	16939.9	21116.7	17912.4	18313.3	19591.2	24638.6	18336.2	8537.85	13240.6	8087.02	12645.5	9739.82	11941.7	9638.02	10989.5	3183.4	10149.4	Terpenoid
M361T414	4053.49	1886.96	6008.81	1055.14	5289.85	4847.37	5183.78	1094.87	2702	4019.21	17487.6	16014.2	16731.2	4039.52	4389.39	2978.71	19757.9	13687.4	18375.6	13883.3	Terpenoid
M378T219	24746.2	23866.8	37062.9	39619.7	26629.5	16804.5	24263.6	208855	27287.7	21175.6	25793.8	6182.91	27531.5	5147.06	23418.1	5367.78	42470.9	6345.82	22792.3	4636.38	Terpenoid
M383T195	86756.3	67909.5	157219	59922.2	110294	2.3799e+06	60436.7	57466.3	99479	2.39303e+06	64625.9	61371.8	98625.6	60597.8	87091.6	52072.6	71641.5	49704.6	65145.5	42456.5	Terpenoid
M383T219	250203	253530	265412	334176	2.28339e+06	194816	294598	2.22938e+06	273542	219830	35481.7	12208	68985.8	12150.5	53727.6	10411.5	45221.1	8758	35748.5	9788.35	Terpenoid
M437T364	2991.94	4639.67	4230.88	4268.46	1084.53	3653.25	3807.25	3329.44	3684	3161.48	2526.15	2759.88	2684.4	2150.81	2455.4	2620.68	2489.96	2187.28	2130.49	2213.62	Terpenoid
M437T343	2311.12	2257.4	2338.8	2113.18	1931.04	2086.03	2254.64	2405.26	2417.38	2221.7	6568.07	7008.64	6662.62	6214.06	8600.98	6391.31	6511.44	6627.93	6861.89	6487.89	Terpenoid
M267T189	3375.45	3837.99	2803.07	3483.66	3280.1	1783.43	3585.96	4240.03	2621.59	4081.41	7586.35	9639.46	8514.08	9130.29	8172.91	8854.3	7672.95	4376.99	8634.65	9383.46	Terpenoid
M285T170	4129.79	5653.24	5299.49	4572.3	5361.04	5003.77	4474.49	5264.69	4577.72	4027.09	5563.79	12842.1	8695.52	21757.3	9512.38	11668.8	27369.5	10213.2	11202.3	9894.34	Terpenoid
M297T34	4665.6	6949.92	6321.43	24436.9	4876.2	26343.8	25386.8	5412.57	6016.96	4455.46	8688.36	28810.3	15385.5	29304.9	6358.66	30437.6	11034.4	29310.9	9540.97	27430.2	Terpenoid
M303T169	5834.88	2263.31	5744.35	4146.74	4993.31	3519.5	3350.19	2822.55	1113.05	3557.33	5645.45	14318.1	7851.66	15186.6	11996.2	8649.24	10879.2	14302.2	6789.54	13038.1	Terpenoid
M303T189	360.122	2030.44	3886.99	4059.72	4050.52	4322.62	1658.39	3535.08	3757.94	4387.99	7801.38	22787.5	7946.89	18576.4	11099	10973.4	7568.29	11399	8337.98	7287.82	Terpenoid
M355T34	23481.3	5491.47	23472.5	21831.3	4317.24	9378.38	4370.91	24416.3	22075.8	22178	34792.4	57083.7	40583.9	65282.7	39414.1	26344.3	36861.7	30665.8	41000.3	37536.5	Terpenoid
M133T162	15934	47860.2	26482.4	21376.6	31773.6	45349.5	42572.4	26060.2	53706.1	22873.8	29289.5	36370.2	29415.3	43891	9806.32	34886.3	36335.2	11497.3	12444.5	7415.33	Terpenoid
M133T41	12161.6	5751.48	13035.5	2497.75	10640.3	10332.6	11345.7	5364.49	11528.9	6733.11	27337.7	34770.5	25347.1	24092.8	41512.6	35211.9	37981	50554.3	33573.6	48073.9	Terpenoid
M151T161	22127.4	37279.2	5231.72	4943.72	13486.9	39132.4	42176	42314.6	19768.6	7097.77	9969.01	11283.5	12215.5	10180.4	7588.81	37644.7	7287.31	37987.9	10918.7	36435.9	Terpenoid
M151T41	6627.53	3861.83	5150.26	30937	28799.9	32070	31593	8221.65	2058.33	5058.72	17803.2	25845.8	14234.6	26867	19312.2	14956.4	17928.5	17626.7	19845.2	24195.9	Terpenoid
M168T169	82417.4	39292.6	85545.6	43745.8	87586.3	58543.7	62084.9	62631.2	88643.1	61443.4	7088.7	2346.58	2687.23	3616.09	1443.04	3705.92	8058.89	3488.94	7498.35	6626.63	Terpenoid
M173T38	11848.1	1283.27	13075.6	11340.1	11231	10148.7	10483	10949.5	1179.93	11094	27429.5	12587.6	8604.04	11996.1	5647.68	8794.09	8712.9	10357	2023.54	8223	Terpenoid
M297T34	4665.6	6949.92	6321.43	24436.9	4876.2	26343.8	25386.8	5412.57	6016.96	4455.46	8688.36	28810.3	15385.5	29304.9	6358.66	30437.6	11034.4	29310.9	9540.97	27430.2	Terpenoid
M355T34	23481.3	5491.47	23472.5	21831.3	4317.24	9378.38	4370.91	24416.3	22075.8	22178	34792.4	57083.7	40583.9	65282.7	39414.1	26344.3	36861.7	30665.8	41000.3	37536.5	Terpenoid
M299T252	1779.28	1032.73	1596.17	1396.36	1813.5	1488.1	1168.22	1336.61	1797.33	1501.13	1959.03	2921.82	2244.15	3232.83	1435.73	2845.28	2059.51	2220.23	2277.21	2752.35	Terpenoid
M317T175	8553.38	23502.1	7519.23	7415.42	7261.19	6936.1	7432.09	7496.38	9304.52	9733.77	18283.4	17745.1	20306.6	32398.6	19921.1	30485	9398.65	16863.9	14502.6	18859.9	Terpenoid
M317T128	2736.47	3340.18	2460.01	3483.33	2265.41	3123.99	2953.48	2763.11	2265.8	3494.31	4406.39	6962.3	5003.38	6435.65	4476.27	5548.03	4629.25	6241.93	4366.62	6019.81	Terpenoid
M317T253	2246.73	1601.28	2141.53	1955.64	1724.36	1315.03	1527.89	1702.2	1553.39	1732.58	4520.7	7783.6	5142.65	9305.78	4124.49	8471.33	4936.04	8664.04	5727.73	7158.58	Terpenoid
M339T31	2130.35	2727.09	3330.3	1994.72	3851.94	2041.13	2263.9	1203.1	2740.89	1993.01	2903.61	15696.3	2374.27	14480.1	4277.42	17885.1	4202.66	16125.3	2526.42	15840.6	Terpenoid
M267T189	3375.45	3837.99	2803.07	3483.66	3280.1	1783.43	3585.96	4240.03	2621.59	4081.41	7586.35	9639.46	8514.08	9130.29	8172.91	8854.3	7672.95	4376.99	8634.65	9383.46	Terpenoid
M285T170	4129.79	5653.24	5299.49	4572.3	5361.04	5003.77	4474.49	5264.69	4577.72	4027.09	5563.79	12842.1	8695.52	21757.3	9512.38	11668.8	27369.5	10213.2	11202.3	9894.34	Terpenoid
M287T169	4977.35	4075.37	4741.85	4342.04	4108.17	4150.2	4621.35	4756.68	4730.09	4602.62	12314.3	13642.2	12387.9	13419.7	12659.2	14717.5	1691.4	567.391	12075.6	3484.47	Terpenoid
M287T169	4977.35	4075.37	4741.85	4342.04	4108.17	4150.2	4621.35	4756.68	4730.09	4602.62	12314.3	13642.2	12387.9	13419.7	12659.2	14717.5	1691.4	567.391	12075.6	3484.47	Terpenoid
M287T169	4977.35	4075.37	4741.85	4342.04	4108.17	4150.2	4621.35	4756.68	4730.09	4602.62	12314.3	13642.2	12387.9	13419.7	12659.2	14717.5	1691.4	567.391	12075.6	3484.47	Terpenoid
M287T169	4977.35	4075.37	4741.85	4342.04	4108.17	4150.2	4621.35	4756.68	4730.09	4602.62	12314.3	13642.2	12387.9	13419.7	12659.2	14717.5	1691.4	567.391	12075.6	3484.47	Terpenoid
M291T171	147.832	166.606	107.03	249.495	78.3905	178.35	114.753	168.21	197.864	153.764	322.123	405.332	54.6109	324.021	280.819	1058.61	333.407	223.222	0	58.9025	Terpenoid
M291T171	147.832	166.606	107.03	249.495	78.3905	178.35	114.753	168.21	197.864	153.764	322.123	405.332	54.6109	324.021	280.819	1058.61	333.407	223.222	0	58.9025	Terpenoid
M291T171	147.832	166.606	107.03	249.495	78.3905	178.35	114.753	168.21	197.864	153.764	322.123	405.332	54.6109	324.021	280.819	1058.61	333.407	223.222	0	58.9025	Terpenoid
M299T252	1779.28	1032.73	1596.17	1396.36	1813.5	1488.1	1168.22	1336.61	1797.33	1501.13	1959.03	2921.82	2244.15	3232.83	1435.73	2845.28	2059.51	2220.23	2277.21	2752.35	Terpenoid
M303T169	5834.88	2263.31	5744.35	4146.74	4993.31	3519.5	3350.19	2822.55	1113.05	3557.33	5645.45	14318.1	7851.66	15186.6	11996.2	8649.24	10879.2	14302.2	6789.54	13038.1	Terpenoid
M303T189	360.122	2030.44	3886.99	4059.72	4050.52	4322.62	1658.39	3535.08	3757.94	4387.99	7801.38	22787.5	7946.89	18576.4	11099	10973.4	7568.29	11399	8337.98	7287.82	Terpenoid
M317T175	8553.38	23502.1	7519.23	7415.42	7261.19	6936.1	7432.09	7496.38	9304.52	9733.77	18283.4	17745.1	20306.6	32398.6	19921.1	30485	9398.65	16863.9	14502.6	18859.9	Terpenoid
M317T128	2736.47	3340.18	2460.01	3483.33	2265.41	3123.99	2953.48	2763.11	2265.8	3494.31	4406.39	6962.3	5003.38	6435.65	4476.27	5548.03	4629.25	6241.93	4366.62	6019.81	Terpenoid
M317T253	2246.73	1601.28	2141.53	1955.64	1724.36	1315.03	1527.89	1702.2	1553.39	1732.58	4520.7	7783.6	5142.65	9305.78	4124.49	8471.33	4936.04	8664.04	5727.73	7158.58	Terpenoid
M329T162	3850.46	7850.27	4535.45	7338.73	6682.34	3579.34	4978.28	3860.77	777.5	4203.11	20304.9	15877.9	9064.62	15307.3	3893.1	15286.4	10119.6	14227.5	12030.5	14134.3	Terpenoid
M331T41	179856	210297	194705	207615	186795	206390	191313	219483	200278	194140	1.39524e+06	1.44191e+06	1.61825e+06	1.44166e+06	1.38931e+06	1.33629e+06	1.32511e+06	1.25232e+06	1.489e+06	1.25654e+06	Terpenoid
M331T183	41891.3	56727.8	40611	44617.7	39872.6	52880.8	54932.5	49289.1	44387.5	50878.9	67478.9	63031.6	68016	58694.8	61745	61259.5	71687.5	62535.6	70629.5	64719.6	Terpenoid
M331T153	18926.7	20199.5	16360.3	18209.5	18984.2	18785	19105.6	24096.7	17067.6	19176.4	561858	418145	514258	401122	594272	419731	609084	477881	363425	478863	Terpenoid
M339T31	2130.35	2727.09	3330.3	1994.72	3851.94	2041.13	2263.9	1203.1	2740.89	1993.01	2903.61	15696.3	2374.27	14480.1	4277.42	17885.1	4202.66	16125.3	2526.42	15840.6	Terpenoid
M363T174	2566.66	4601.62	3544.54	5690.85	2424.37	4719.11	9422.56	7634.09	3963.39	6265.8	7777.77	3541	5010.87	4932.63	4963.06	7247.59	5312.91	5103.69	4363.37	6015.34	Terpenoid
M369T35	3635.19	4136.1	4568.22	7889.3	3699.72	3077.18	4640.59	7000.69	3340	4382.87	17828.4	7176.42	17981.8	23423.7	9003.8	8681.64	7581.1	7859.48	13275	13599.7	Terpenoid
M377T412	1252.41	1104.14	1645.53	1484.6	1267.2	1781.36	1249.62	1871.66	1563.74	1231.78	4448.58	4622.9	5585.1	4954.46	5366.52	4735.69	5101.12	4762	3973.99	4319.3	Terpenoid
M385T163	11602.6	10264.9	14629.3	18324.9	8650.31	17225.3	13095.4	9310.9	9828.73	9413.1	8100.27	8893.09	3287.09	5709.36	8407.59	12474.6	4611.4	4528.81	7194.85	2133.68	Terpenoid
M387T307	8114.06	6671.16	7614.8	16168.7	8911.28	7903.33	7755.5	8193.4	9317.04	7075.59	7871.72	5193.23	4893.81	4552.76	12452.9	2904.12	4547.26	11982.2	4698.85	5034.56	Terpenoid
M387T35	81389.2	103170	94944.2	84613.9	76401.9	100403	100760	87993.3	75000.9	91026.5	63425.1	51404.8	74389.8	50426.4	67889.2	50666.9	79801.1	49364.9	62128.3	47059.2	Terpenoid
M401T451	2534.19	2371.82	4845.93	3327.99	2487.66	248.76	3103.48	2125.6	3420.61	2454.7	19825.7	12282.1	26161.2	12333.6	21012.4	16791.6	22641.8	14047.2	20411.5	11257.5	Terpenoid
M403T195	8688.52	7789.43	13432.1	11892.8	9431.88	9687.57	9745.56	9797.91	8118.62	5959.15	12360.2	29663	17424.3	24988.1	16871.8	24266.7	13408.3	21116.1	20502.5	18474.4	Terpenoid
M426T174	4566.55	4845.98	4735.49	4657.91	4394.54	4479.8	4302.61	5012.95	4468.01	4999.56	5344.16	8270.04	5570	8089.59	7991.3	8771.94	5812.89	7925.98	8208.86	7643.08	Terpenoid
M201T404	4047.8	4801.09	4260.77	3818.79	4579.09	4235.46	3647.63	3582.82	4112.51	3519.91	21499.1	26544.9	23970.4	23752	23117.4	23611.6	22895.5	21680.7	21264.2	20705.1	Vitamin
M206T234	7733.78	7434.56	6649.45	7214.68	6508.97	7381.05	6941.82	8150.26	7047.96	7833.34	452.949	781.976	505.351	616.076	311.988	658.563	352.232	1036.23	364.529	911.144	Vitamin
M206T352	173.707	113.742	182.46	294.643	346.53	130.63	130.194	117.252	231.056	109.67	88.1079	111.951	124.052	114.249	79.8677	122.093	157.299	146.763	87.2539	102.344	Vitamin
M207T258	52503.2	47278.3	63985.8	49990.3	49460.4	50330.4	51995.4	45140.4	52657.2	47853.5	48525.9	50197.4	58497.8	63849.5	61002.3	60204.9	51233.4	48508.4	44518.6	47620.1	Vitamin
M234T249	983.393	1667.98	1297.81	1086.04	852.678	1203.15	1147.25	1341.76	1086.42	901.433	2404.72	919.891	1835.16	1961.41	2424.49	794.892	2368.05	473.049	896.681	317.52	Vitamin
M201T404	4047.8	4801.09	4260.77	3818.79	4579.09	4235.46	3647.63	3582.82	4112.51	3519.91	21499.1	26544.9	23970.4	23752	23117.4	23611.6	22895.5	21680.7	21264.2	20705.1	Vitamin
M206T234	7733.78	7434.56	6649.45	7214.68	6508.97	7381.05	6941.82	8150.26	7047.96	7833.34	452.949	781.976	505.351	616.076	311.988	658.563	352.232	1036.23	364.529	911.144	Vitamin
M206T352	173.707	113.742	182.46	294.643	346.53	130.63	130.194	117.252	231.056	109.67	88.1079	111.951	124.052	114.249	79.8677	122.093	157.299	146.763	87.2539	102.344	Vitamin
M210T393	784.2	611.927	634.641	324.503	1027.06	519.369	387.84	652.277	594.031	614.699	699.509	775.064	438.073	865.502	620.407	848.659	434.476	673.1	475.695	1308.7	Vitamin
M235T417	3587.57	1576.27	9658.71	9083.97	7315.35	5713.55	6413.23	5864.41	6587.33	8985.33	15779.4	18931.6	19914	16429.1	19263	21546.7	12847.8	11958.7	12212	15378.1	Vitamin
M566T199	34968	35554.4	36933	36847.8	37129.2	41242.1	38921.1	41159	36904.1	37756.7	4305.89	4602.16	4373.11	4426.64	4568.72	4228.02	4860.02	4221.36	4108.48	4689.06
M395T337	5218.61	4676.4	5034.49	5526.01	4855.95	5034.58	5774.32	5532.19	5560.58	5832.5	545.201	469.386	558.842	605.655	514.153	550.339	534.294	563.174	543.97	586.489
M365T364	1.13316e+06	1.07585e+06	1.08362e+06	1.03262e+06	1.23619e+06	1.15758e+06	1.07944e+06	1.02584e+06	1.27167e+06	1.20764e+06	83843.8	78660	93194.3	103561	92899.7	101230	88506.6	101070	91061.4	95079
M246T536	132195	133409	131210	129827	115766	127022	135087	113025	110316	119306	8737.42	7614.67	9375.03	7263.98	8090.88	7528.52	8818.43	7512.89	6488.85	7529.27
M678T436	24575.8	13921	21683.3	15323.9	23773	14284.3	18163.3	15248.7	25380.4	17673.8	116.46	88.5107	73.3942	98.0067	88.9152	123.643	95.6163	143.457	98.5378	140.76
M394T413	11464.3	13301.4	10151.2	12014	13624.4	17002.9	12519	10384.7	15458.4	16140.6	239.269	295.285	338.26	307.492	346.683	381.015	294.675	279.866	304.433	282.451
M262T239	11741.2	15623.1	10360.5	19281.4	11704.3	18331.9	19271.5	19658	11792.1	19016.9	87.1336	101.845	98.4269	137.054	120.849	172.317	125.491	177.374	137.411	104.185
M538T404	30015.5	22669.6	32183.7	20917.4	26279.5	20936.7	23955.9	19401.8	26725.9	23445.6	590.123	561.155	689.778	346.179	654.448	403.716	607.287	437.534	581.746	418.215
M565T198	110389	118680	118605	123371	142660	136826	147307	138557	141748	119831	12721.9	11631	10905	10767	13199.9	10932.3	15113.1	11666.8	11227.5	16587.8
M502T434	19934.9	9652.53	17552.8	11203.7	20740.8	10772.2	11635.9	10522.6	21662.3	11518	146.057	185.591	75.3635	188.657	164.703	206.682	193.985	185.302	164.714	190.529
M575T323	26981.7	24298	27645.5	21114.3	25104.7	22387.4	25376.9	22770.4	24952.9	23776.5	362.682	319.198	185.318	281.162	298.178	260.354	340.329	267.783	344.095	310.131
M710T307	26274.3	16960.3	29326.2	18703.3	27011.7	17700.8	17883.3	16975.7	25305.9	17607.6	1411.46	828.331	937.133	791.661	1089.92	1024.38	1105.41	1300.06	1438.1	1037.31
M511T409	49008.9	39693.5	53695.3	41992.1	48489.3	35102	37202.4	41051.3	41410.3	36179.5	7796.38	6843.27	7817.04	7340.52	5502	6162.4	5987.44	5479.96	5592.1	6334.32
M593T410	20695.8	22708.3	18767.5	22626.1	20070.6	24947.3	23566.7	25323.8	17982.6	24494.8	2937.44	3059.03	2801.91	3004.95	3176.43	3159.77	2845.65	3057.9	2830.65	3511.87
M454T225	4936.12	4522.42	6684.43	5469.86	6138.89	5175.09	4903.46	4529.91	4827	4941.31	814.461	866.441	845.439	852.818	917.027	880.85	743.083	812.909	1014.7	893.001
M379T304_2	32160.3	45057.3	56101.2	43126.1	33012.4	35373.9	45056.5	39459.2	33304.4	37312	2209.78	2328.51	1555.91	1962.33	1587.97	2489.09	2472.46	3018.14	2261.76	3023.84
M549T213	31191.3	28859	31806.1	32421	34689.5	21701.6	24538.9	34565.4	32502.2	27031.2	3173.45	4010.27	5118.83	4046.25	4072.97	3346.51	4006.1	3235.02	3343.87	2881.38
M550T213	14040.8	11290.9	14731.6	13056.9	14740.3	9512.54	10070	14224.4	12692.4	11546.5	1649.97	2019.57	2176.93	1781.82	2094.91	1506.41	2163.05	1608.41	1649.01	1702.78
M348T389	8223.38	16161.6	13010.8	18048.3	12500.1	17512.2	18542	15861	10211.1	14477.7	303.565	337.739	390.271	372.103	439.974	404.608	507.703	368.908	440.207	293.042
M417T211	11031.9	13827.1	12224.9	15058.5	8374.82	11572.4	12892.2	11205.8	12997.8	10283.1	1519.75	1291.33	1548.09	1299.1	1410.22	1618.33	1729.35	1736.71	1336.66	1285.68
M439T441	235500	300319	193236	243784	241083	287382	273826	241106	257852	296674	47704.5	50408.4	52762.2	47669.6	64140.9	47945.9	42749.2	42991.6	59308.2	52780.7
M385T218	34913.5	30352.5	32473.1	31674.9	34226.2	31057.3	32180.5	31614.2	31436	34489.8	894.67	799.333	1048.4	781.31	1042.16	757.482	1030.08	728.957	833.895	730.706
M220T168	291949	197824	241781	237773	203169	324792	242123	220723	170531	383503	8810.41	11673.7	8841.1	13869.3	10078.9	15187.2	6892.66	10320	7057.78	13194.6
M550T197	106188	119707	121896	69334.4	77033.7	74429.4	72296	85735.3	88697.7	143670	5577.13	5393.65	4920.34	4576.44	2309.17	4393.99	5620.37	4590.2	5168.69	4934.83
M378T417	16583.8	20307.8	14804.9	14974.1	15332.4	16522.8	14935.7	15057.2	34283.3	18100.7	91.6825	114.807	105.202	89.9608	103.884	97.3161	98.249	93.8953	122.584	101.96
M684T340	17603.3	14873.4	19527.6	15154.5	18604.2	15496.4	18419.3	16271.8	20558.5	18250.6	1515.38	1312.31	1795.38	1612.51	2434.86	1679.81	2099.48	1543.59	2058.76	1736.13
M358T418	11608.7	9063.56	7783.17	11596	13695.6	17806.2	15480.6	11512.8	12579.5	13066.8	741.524	418.526	732.856	811.89	871.09	902.291	846.421	1051.08	687.782	721.586
M481T224	3717.83	3104.38	2731.69	2907.37	3522.48	3454.95	3018.06	2871.44	2985.08	2992.08	990.949	1241.65	947.65	1101.6	1116.75	1029.36	916.441	1139.58	1084.78	999.951
M461T218	63435.6	80933.7	72259.8	71794.2	69162.4	64835.1	65901.6	67500.1	81129.6	105557	11183.6	9063.25	11043.6	9429.38	12294.7	7544.71	8065.16	7182.15	11803.2	9553.69
M164T306	56371.8	75295.8	56325.4	80601	62517.1	81219.6	87409.1	80700.7	59619.9	80588.2	49.6272	98.2164	36.3899	84.904	39.2987	100.643	44.462	94.189	44.4387	77.1046
M863T426	14813.6	11379.2	10958.5	10606.2	13737.5	8201.01	12876.8	10358.3	10639.1	9902.68	1621.02	1472.17	1435.52	1689.25	1630.44	2022.91	1384.21	1438.67	1727.96	2431.67
M565T260	813168	350592	522813	379921	650634	586126	539499	462453	791539	642903	7974.81	7416.69	8898.45	7024.64	7732.67	6630.17	7845.78	6899.09	9988.37	6627.47
M527T407	20121.1	23225.1	22718	23740.3	19199.4	17602.2	17759.8	17851.5	19019	18926.6	3317.87	2399.87	3869.06	2964.35	3047.01	2795.17	3685.52	2722.03	3723.83	2538.2
M528T415	31060.2	37554.6	33654.2	29949.2	28895.9	30546.7	34090.7	41328.6	37931.7	43254.6	6300.56	7665.01	5239.58	4860.25	5157.1	5678.72	8206.29	5958.83	6263.86	5901.64
M208T300	38478	36820.7	39719	51310.7	34707.2	38859.9	48497.3	36252.9	36357.5	38280.3	23.1025	48.4122	37.9987	28.5153	28.7673	34.0932	27.6446	12.1896	23.7041	34.845
M543T126	220215	135749	226395	151511	220948	152938	173641	143706	115188	92966.7	8269.34	6132.94	9071.58	5929.56	8828.26	5726.12	9080.66	5930.72	9034.83	5573.76
M1049T501	21067.9	21267.8	27207.5	20356	18656.7	19618	26007.5	21643.2	18791	22559.6	5621.17	5912.31	5476.68	7219.02	5505.89	5067.08	5578.83	6388.77	4517.05	5374.03
M204T258	29711.3	38900	39769.2	41641.4	40606.8	36499.5	40377.7	41254.5	33657.3	37792	11211.2	13640.8	14445	14614.3	11256.4	13003.5	12228.2	13283.9	11707.5	13556.7
M232T364	3707.12	4394.13	4314.35	5053.46	3876.32	4201.9	4731.91	3959.47	3566.72	4836.72	910.17	1252.82	927.822	973.316	861.098	828.358	707.233	1057.9	855.45	891.302
M708T298	16211.6	14730	23934.7	14881.1	21218.9	13396.6	14458.7	13139.5	17079.4	13446.5	1671.22	1352.03	1222.88	1224.4	1271.75	1519.34	1452.54	1448.42	1209.14	1240.67
M565T213	19646.9	15229.1	15702.9	18339.5	17741.1	12908.7	16936.4	21427.2	20817	18476	2873.09	2785.33	2399.36	2504.51	2744.39	2480.43	2840.89	2805.48	3098.85	3044.35
M178T198	175493	181380	95414.5	206277	142712	256155	250962	291562	146468	324032	3808.07	2517.07	3556.84	914.002	3288.1	2476.8	3610.16	1724.08	3186.52	3000.21
M520T223	3317.47	2580.66	2314.74	2903.74	3293.11	2759.31	3065.55	2854.35	3536.91	2662.09	845.904	648.123	891.24	714.907	814.866	878.46	800.536	785.425	862.248	779.592
M649T249	52211.3	81107.8	52364.6	61673.3	51075.4	52960.9	55304.3	53023	39658.1	52625.6	9596.12	12191.2	10058.2	9002.95	11472.1	7665.39	10061	8695.13	8242.1	8562.69
M208T258_2	95260.4	142911	69879.6	90920.8	104957	98940	102556	69637	99354.7	137225	2287.32	1867.74	1946.49	3500.43	4060.7	3379.01	2236.85	2757.15	4046.48	4973.75
M581T245	37518.5	35962.3	38943.7	36681.1	33397.1	44040	37302	37196.9	58072.6	38894.5	5707.56	6190.95	8543.42	6474.22	7068.27	6268.37	6347.06	5356.18	8869.02	4947.99
M707T296	46420.2	34207.3	63225.1	35828.8	54492.4	36723.8	34769.5	32572.3	50691.2	33124.1	2059.05	1483.2	1964.77	1757.95	1934.03	783.222	2134.91	1967.25	2382.44	2151.27
M542T191	19722.3	27560.4	30539.9	32734	20960.5	20889.3	30717.8	22472.1	26578.2	32292.7	3028.96	3185.64	3074.06	3124.41	3474.85	2826.13	2765.84	1899	3012.95	4655.98
M758T352	30221	24015.7	21109	19584.9	22750.8	16770.7	17453.5	21955.1	19595.1	18634.1	2126.16	2766.12	3480.16	2324.28	3652.09	3126.35	3270.93	2399.18	3694.18	2383.97
M298T256	91455.3	58655.4	65446.7	57758.8	88053.6	61201.1	58855.7	61820.3	81570	63540.2	12416.5	10859.1	18808.7	13551.8	12723.8	12636.8	11403.9	11565.5	10598.9	11470.8
M252T142	1.02396e+06	375425	789123	378526	837207	388663	402355	459948	966407	505402	12175.6	4577.01	11992	4698.31	11634.7	4910.36	11703.2	5363.04	12120.2	5978.73
M276T327	11014	7624.77	9785.4	9529.46	8985.83	11419.2	11555.5	7661.68	6207.37	7713.47	525.693	227.023	223.855	395.763	273.244	254.502	372.373	314.95	515.397	439.88
M549T198	480711	266955	300300	455032	357791	479596	481383	552797	590217	564107	15544.1	13287	16423.5	14760.9	14215.5	12915.1	18362.8	12563.8	15388.9	12450.1
M555T402	9830.12	9452.2	11162.9	8297.69	9496.2	8347.85	8734.33	8357.56	10144.7	9056.46	1286.39	1661.56	1295.64	1372.74	1083.83	1501.74	1236.19	1887.56	1409.72	1784.08
M1050T501	8883.91	9268.77	12036.5	8529.75	7682.42	7933.86	11023.2	9149.41	7793.49	9685.25	2035.97	2604.7	2603.45	2506.75	2831.69	2390.68	2308.74	2366.48	1710.95	2349.01
M579T233	805891	796258	824772	823997	765258	809418	922084	882140	810401	944113	30614.2	21949.8	39880.1	25598.5	33304	22707.9	31513.1	22359.3	28626.3	21517.9
M257T443	12260.5	7768.49	10320.1	17655.8	15908.9	9888.71	10934.7	12388.8	12963.1	10690.5	1347.05	851.385	1489.32	1692.34	1121.63	1268.65	1314.63	1884.53	921.055	1239.93
M247T536	12278.6	14403.9	11269.3	12726.6	11788.3	13332.3	14097.3	11520.5	10869.5	13008.7	1060.86	1085.73	1467.95	1304.47	1512.01	916.939	1056.45	1030.4	1048.1	778.81
M355T399	1819.27	2499.34	1808.22	1579.37	1701.63	1852.67	1797.11	2241.95	2147.42	2708.59	494.934	398.685	463.426	415.868	498.298	380.827	437.305	543.405	485.008	343.426
M593T218	34877.2	18350.9	21824.9	22415.4	24126.2	18748.4	19265.5	31729.2	30497.2	26187.4	2659.37	4157.83	2613.61	3824.1	2731.72	3778.64	3274.85	4529.04	3279.04	4035.49
M469T230	8059.34	12183.7	12901.3	9504.28	9917.94	12552.1	12060.3	8889.79	10596.9	12683.4	876.674	2026.04	1169.99	1079.6	878.086	1302.17	1356.94	1405.55	1242.64	1030.23
M757T352	71194.5	43955	47518.8	42342.9	64460.1	42962.8	45521	44017.4	51225.9	47216	4423.03	3669.22	3977.71	2781.23	3994.92	3072.73	3807.44	5698.83	4733.46	7078.83
M443T199	58021.2	44224.1	37942.2	49120.8	45943.8	50010.5	51656.4	48061.7	55622.7	66119.9	13558.3	11915.7	11512.1	13886	13006.4	13169.6	13707.8	16414.6	15811.2	17704.4
M129T365	9777.81	8678.17	8647.26	8677.22	7623.28	7588.05	6276.31	11094	6728.11	7704.61	2069.45	2148.63	1431.8	1883.96	1772.92	2125.03	2037.55	2256.61	2032.67	2513.07
M491T232	14682.3	20001.7	18031.9	20911.8	18495.9	21852.2	18725.7	17585.2	15891.2	18537.2	6115.96	6734.59	6151.51	5939.83	5886.39	5662.36	6544.52	6855.72	6317.35	5516.09
M421T231	8429.14	8311.75	8597.12	7892.52	5692.07	5672.79	7786.92	9618.93	7559.93	10858.2	841.376	1366.58	1034.58	1056.33	521.632	1049.18	762.535	1016.65	843.569	1070.37
M472T211	8428.96	16719	8021.18	9293.72	8030.46	9809.76	10735	11585.1	12300.4	10633.3	1475.11	1525.88	1296.63	1295.83	1886.9	1815.06	1950.83	1766.45	1909.88	2069.31
M326T415	79642.1	225527	117568	101898	56503.8	83757.3	97663.9	127551	108937	186216	3118.79	8530.55	3132.91	2080.46	3268.98	3367.51	3445.47	5549.56	5583.95	4190.75
M645T216	62567.2	40900.9	56865.6	64173	72063.5	59189.4	56680.5	50815.3	57170	47536.2	6324.82	7606.45	8660.21	7768.43	8214.11	11303.8	12299.4	7332.92	7554.57	12123.9
M410T343	38171.7	45829	39449.5	43062	40925.8	44965.5	50208.1	48194.2	41730.2	48964.2	13751.5	10295.8	16321.5	9934.22	12138.2	14579.4	12889.7	12563.4	12615.5	13413.2
M532T323	11175.9	6950.22	8506.89	8187.96	10189.9	8519.48	10162.8	8240.09	9763.93	11673.3	2811.04	2141.11	2436.44	3086.47	3157.38	2047.77	2694.68	2899.99	2603	2399.59
M363T306	36341.5	75723.8	52061.5	61481.1	43335	63832.2	77589	61717.7	39998.6	55013.1	2588.01	3763.71	1578.96	936.645	1879.06	1953.82	3080.83	2277.59	1859.21	3027.83
M203T258	726744	1.06486e+06	969361	1.11251e+06	872786	967536	937784	919264	752573	862073	201048	314833	253965	319310	216735	291133	230099	279065	211898	276671
M423T426	24956.9	14146.4	16602.2	21283.5	21648.8	23363.9	21864.2	21477	22644.3	21235.7	6627.36	4624.3	5794.15	6125.87	5928.48	4910.64	5426.16	6170.92	5806.08	7224.56
M296T386	6803.73	6887.9	4636.33	7440.98	5732.82	7508.54	8042.75	8579.38	6205.9	8866.43	1757.71	1117.11	1814.78	1289.1	1032.61	1379.11	1643.98	1341.05	1883.32	1255.81
M611T215	28718.2	18900.4	21824.5	20923.5	21356.5	17888.4	20533.5	24741.8	21477.7	27568.4	4280.9	6580.91	4249.94	6227.52	4432.03	6595.22	4811.22	6226.17	5074.83	6586.59
M609T198	45415.2	25491.3	25161.6	28035.8	27780.6	29681.8	26160.5	32311.5	32653.2	39027	6807.73	7432.57	6012.7	6922.86	6597.06	7043.74	6562.09	8005.09	7442.03	3848.69
M326T350	16388.7	21105.9	15989.3	21375	16213.2	17870.9	17583.6	16764	14113.6	19953.2	3340.27	4217.25	3875.55	3155.29	2564.67	3241.3	2514.92	3084.85	2427.09	4504.69
M264T177	9586.11	10869.5	10001.6	16513.6	12764.1	15963	12760.6	13457.7	8684.94	14421.3	1477.37	788.258	1897.39	1732.66	2328.43	1629.96	1638.4	1778.3	1392.48	1491.07
M690T493	25593	49544.1	90009.2	28254.6	28912.8	28933.7	29285	38963.3	38477.2	39908.5	2298.88	1547.1	4176.79	1844.93	2033.68	1732.09	2313.53	2749.15	1688.56	4047.61
M409T321	45195.8	24227.9	31831.4	33615.7	30997.4	48724.5	37539.3	30031.7	36545.2	34265.2	7142.29	7799.55	7753.56	6806.28	5664.66	7068.16	6345.24	7205.82	6045.44	5814.04
M346T299	29126.4	33358.6	30884.5	16090.4	25059.6	26609.7	22078.7	24070.6	33099.9	24627.9	842.534	2270.24	975.863	1230.93	1569.94	1609.58	1643.48	1381.22	1864.8	2780.48
M1083T366	9000.68	4592.06	7547.42	6324.68	7483.08	5657.02	6211.71	4861.94	8487.55	8372.22	1690.75	1130.17	1121.21	1017.06	1405.69	1093.76	1311.19	1011.99	1378.95	1076.31
M342T200	19604.5	22819	25026.9	26490.5	27841.8	27585	24506.1	22883.9	22453.3	20187.7	7973.46	8428.85	10073.2	10078.2	10914.1	8735.58	11571.7	8761.52	9080.17	7949.45
M268T172	482651	119480	324697	163021	398348	162161	171822	165497	433412	202427	9288.1	2863.73	6439.93	6189.72	5797.04	6090.69	5018.02	8049.92	9424.93	8788.51
M194T321	56622.8	61795	5202.18	64905	53850.8	72013.3	74913.1	68097.5	54172.1	76216.9	19.7272	30.8568	19.6225	34.8047	14.1132	42.6362	21.7288	37.6725	27.8319	31.8015
M251T202	9228.87	21749.9	27751.1	17821.8	23928.7	17778.6	18990.1	13094.9	21051	13213.7	1277.89	1873.39	2088.27	1647.15	1787.42	1469	1545.86	1125.94	1259.28	1217.38
M621T258	46776	23872.6	27614.1	30950	33307.8	36152.8	31529	44903.7	34664.6	46529	4996.7	8069.67	5237.27	7498.73	4697.96	8805.44	6937.7	8187.87	5774.19	7205.97
M370T410	16911.2	32742.9	34801.4	66417.4	20518.6	18189.6	29707.4	68823.8	26303.5	17409.9	125.462	315.629	634.06	553.479	180.853	193.356	67.3596	328.005	218.402	130.073
M531T323	49729	43028.8	32491.9	38281	31585.3	38982.6	33938.1	30304.3	33555	44565.7	9677.37	8169.15	9783.01	9149.34	11184.5	10184.3	9875.4	10731.6	10878.5	10052.4
M147T372	28717.3	19748.9	26240.8	25442	45420.6	20364.9	34604.2	21202.7	32128.2	22294.6	4256.78	5361.71	2243.42	2555.59	2914.26	3414.64	2691.23	2414.73	4592.31	3791.83
M208T411	29806.5	54010.4	96167.6	39756.6	23529.4	62022.4	71486.8	28980.9	23655	15406.1	401.064	1212.52	923.362	535.389	581.546	649.99	410.66	254.083	232.934	155.07
M356T417	54723.1	52808	45399.2	53341.2	62055.6	65028.3	62296.6	56819.8	67104.9	65311.3	244.866	85.4365	83.9376	80.7616	146.011	121.963	116.35	276.707	116.886	294.652
M141T222	12007.5	10634.6	21030.9	17993.6	9083.52	13376.8	18830.8	25240.1	52779.1	25781.4	234.538	476.745	450.927	502.054	526.411	481.683	323.414	629.81	694.385	723.987
M258T386	7586.31	7678.18	7215.9	6016.22	6479.2	7005.4	6001.94	6920.32	7501.39	11160.8	1986.93	2229.66	2024.91	2289.64	1921.72	2116.25	1648.85	2373.4	1918.48	2211.07
M152T258	37144.3	47720.4	51585.7	32223.1	52089.1	46725.5	52886.8	35414.2	42730.4	32845.9	8661.25	10921.8	12674.3	13758.7	12457.6	12279.3	11968.5	11124.3	8657.17	14003.4
M226T382	9788.01	8629.41	9295.2	8956.99	10471.4	8302.24	8260.51	8406.33	10121.7	9080.95	1116.7	1164.23	1749.25	1836.36	1434.05	1593.1	1293.99	1209.26	1692.78	1971.1
M411T343	12449.7	18829	13622.2	17429.8	13311.8	18563.4	21387	20300.5	14308.8	17955.5	2225.23	2062.65	2167.28	2166.1	2355.8	2201.39	2471.32	2337.59	2477.11	2270.93
M917T497	3676.15	3700.43	3921.25	3921.22	3238.23	3426.22	4880.55	3840.3	3329.08	3622.82	181.324	340.205	282.7	359.798	253.839	333.769	402.715	445.428	457.511	328.339
M527T465	86291.7	89314.7	119257	74968.4	71929.9	72298.3	80597.3	61362.9	68487	105269	25883.4	20572.5	26759	24205.6	20705.2	20185.9	17041.7	19295.9	18561.4	24079.9
M201T258_1	41178.6	57079.4	58387.1	40425.4	49785.4	45569.3	51308.9	40020.9	45380.2	39803.9	10820.2	13591.7	10475.8	15214	9569.44	14174.9	9411.34	13502.7	8299.59	13716.5
M191T258	27371.5	40124.5	45382	33052.8	36483.9	33123	37322.7	27240	31620.2	26928.2	5749.31	9315.98	7457.07	9879.11	5905.13	9075.83	6604.89	8486.36	5314.81	9278.15
M579T249	39456.6	80626	50865.2	90866.9	49895.8	24817.6	53254.3	66106.3	74469.7	29228.7	2348.43	1789.47	4169.26	2802.08	2633.53	2254.4	3716.88	2834.72	3931.02	2824.25
M372T343	3526.26	3533.51	4724.84	3185.52	4959.69	2630.15	3110.4	5607.63	3448.14	3015.55	442.321	497.106	258.47	390.466	229.374	491.486	504.012	665.789	302.437	505.574
M395T346	260099	199298	269147	530096	168556	389836	498900	584164	218550	520102	13158	13068.4	14577.3	13854.7	8294.55	9734.8	21692.8	18522	13839.4	13977.7
M440T136	4588	4361.4	3366.8	2922.61	2915.57	2910.01	2896.02	3066.07	3883.24	3925.96	1303.2	1278.55	991.413	888.377	782.951	886.255	806.062	934.323	1029.56	1225.48
M675T215	88145	74783.8	71466.4	53436.8	82628.6	51094.5	65957.1	76800.8	103658	55673.9	20715.7	11583.5	13899.5	9108.49	15128.2	11149.6	15744.6	12444	19429.9	13530.9
M547T204	20567.9	11918	12469.9	27883.4	21131.8	18166.4	13636.4	15918.3	16102	21709.7	2802.76	2559.59	3521.06	5095.85	3649.48	2943.31	2370.48	3049.04	3458.21	2283.96
M547T198	77761.8	49689.6	60752.7	73109.4	80726.3	72908.4	45965.8	43499	46979.5	80765.7	8424.99	8987.73	9746.12	7856.83	9232.97	13372.4	8662.93	6595.92	5790.66	3955.18
M410T223	6053.11	3411.64	4699.52	5570.21	5516.32	4755.66	5559.89	6324.05	6314.24	5442.03	1610.87	1364.86	1210.57	1462.12	1306.62	1704.47	1535.47	1975.96	2078.88	1898.79
M678T409	8260.89	4208.1	5752.28	6476.04	6192.37	5802.56	5167.31	5757.14	5747.41	5732.35	886.222	1596.28	1653.6	1505.72	1803.62	1602.61	1993.48	1663.72	1560.67	1638.92
M167T69	70099.4	65851.9	59975.2	73374.4	62856.2	73170.7	52619.1	72661.3	56508.3	76043.8	1287.47	1086.18	1245.82	1548.88	912.603	1978.78	656.282	2076.47	817.254	2255.43
M677T410	16480	12165.6	17567.8	12201.8	14770.3	14061.1	14011	13947.9	14955.2	14465.9	3555.17	2714.2	4233.86	3998.91	3884.88	2774.9	3721.88	2331.54	4204.39	2962.42
M280T386	10084.6	26599.4	10818.1	18662.2	13566.6	18334.2	16642	19710	12428.5	24883.8	1005.08	1287.67	1339.9	1340.5	1455.18	1275.52	1105.62	1549.57	1636.89	1454.46
M560T165	238164	312307	214515	256671	252007	240038	193304	207027	193430	251724	5621.73	9560.52	6765.56	4912.82	9665.26	9550.56	5209.93	8799	8006.27	2605.93
M471T207	11081	8292.26	5993.36	7457.1	8092.61	9654.66	8971.55	8948.65	8417.39	5936.21	3267.91	1812.86	1924.28	1830.42	2102.75	1922.48	2617.03	1931.49	2429.15	2874.07
M157T343	2692.89	2799.92	3119.45	2811.51	3184.6	3103.67	2976.92	3767.83	3432.78	2851.67	1373.72	1054.12	821.779	1309.65	1047.62	1198.78	915.409	1080.99	987.579	1264.01
M547T175	316008	175994	150447	318329	314720	522747	505673	541429	355723	460675	21699.2	5599.8	10832.9	13622.9	23374.5	26207	26782.6	19772.5	22574.5	16380
M706T253	61382.2	34238.5	44409.1	20158.2	38441.7	32172.2	36035.8	24718.5	49269.8	47564.4	8058.61	5342.01	6000.59	3773.06	4137.55	3723.85	7117	4213.2	5058.86	5059.18
M307T341	2168.07	3058.96	1853.66	2381.36	2695.96	2964.15	1671.76	3119.3	2085.12	2655.38	882.214	783.108	618.866	457.264	572.137	627.789	562.693	641.352	744.715	760.972
M266T413	148522	220423	167586	165524	137466	205186	229001	195717	160496	217771	59154.9	60734.7	52202	46613.2	54175	59286.2	62255.7	63390.9	64593.4	65962.3
M254T357	5760.56	8644.87	8829.58	8007.56	4948.31	7116.56	7874.29	5747.44	6354.08	5032.2	1148.06	872.555	348.301	528.564	559.796	842.184	597	429.826	912.858	625.558
M689T183	14590.6	8764.42	9611.96	7893.13	10256.7	13804.3	9821.79	12620.2	14012.1	12085.1	2273.64	3752.53	2004.69	3334.32	1720.31	2690.46	2392.2	2322.81	2546.36	1651.88
M371T218	19332.8	21018.1	49428.2	21954.2	47871.9	22669.4	22205.2	28998.5	22967.9	21803.6	3415.38	4063.68	5435.93	3604.86	3845.68	3020.91	3600.99	4245.67	2666.29	2167.58
M200T258	308156	452733	463790	379004	378508	339673	385239	290017	331798	271617	65654.4	101136	73816.9	112990	68571.7	98171.7	62325.1	93584.3	55216.7	100126
M727T322	23606	18359.2	11362.8	14967.1	19992.4	9476.64	19666.4	36738.9	19135.9	20512.6	1713.9	1925.61	2303.87	2034.25	1174.63	1526.95	3027.85	1837.53	2703.65	2211.07
M554T166	100698	265518	240655	167771	227042	326184	369104	365865	282863	124056	4556.93	4944.48	7620.21	3415.77	6347.29	10305.3	9334.89	5888.11	6402.74	1103.28
M383T328	9022.2	10749.1	6621.22	11048.6	7199.01	12545.6	11924	9546.96	11109.2	14454.8	1900.64	2526.15	2019.18	3145.07	1819.98	2822.28	2311.72	2708.5	1784.99	3226.67
M717T211	29622	23015.3	35456.8	28228.5	16773	17226.4	28221.4	21311.6	17937.1	25289.7	1311.1	2318.6	2745.59	1215.18	1236.67	834.439	2584.65	792.999	1030.05	1295.05
M435T258	22370.3	44174.6	35678.9	27072.2	33997.5	31963.8	34465	25444.3	29593.7	28083.2	12880.9	8439.81	5290.12	7450.6	7934.04	7233.31	6887.38	7198.93	5416.81	7716.59
M493T225	21352.3	22779.2	24495.8	20042.5	21441.4	19486.5	22580.6	19755.2	18616.8	13778.4	3323.02	6621.61	3632.82	4258.75	3585.31	5017.69	4147.35	4849	2756.97	2933.66
M731T507	3151.31	2389.69	3764.71	2143.99	2428.34	1535.44	2756.02	1572	2103.32	2199.95	599.563	468.848	453.854	431.613	399.676	297.353	325.655	562.696	298.574	621.749
M382T364	65559.3	61421.2	43311.8	41343.9	34710.8	43493.8	56233.4	54972.8	51527.6	56786.2	15726.5	13722.5	12120.4	7768.35	9399.69	10631.6	11074.1	18818.6	11002	11689.3
M437T147	81703.4	95368.7	72160.4	99489.5	62663	87289.2	80108.8	82876.5	60463.8	95900.5	35106.8	36915.9	34541.1	30916.7	25690.9	27954.8	25114.3	29358.8	27037.7	30330.5
M594T218	11650	6944.56	6612.32	5484.29	7729.51	5878.27	6439.48	10301.7	10009.5	9061.66	1195.62	1850.12	1433.07	2019.93	1509.94	1741.03	1462.46	1656.68	1509.31	1785.05
M381T363	479239	588309	421916	503928	466461	504580	488119	484796	431529	597859	114835	180694	104361	172896	113052	144071	130054	140536	118091	180748
M559T165	1.05943e+06	1.08606e+06	895740	1.05225e+06	966285	1.25818e+06	1.02022e+06	1.00164e+06	896554	1.16905e+06	15976.6	17999.6	23504	8883.95	35154.4	30985.6	18813.8	18417.9	38501.3	17135.2
M543T415	49165.3	59204.5	57097.1	63636	53240.9	84045.7	98803.6	60343.2	49813.3	66177.2	15202.3	12086.7	13162.1	12595.4	14089.3	12026.3	13081.7	13177.5	16516.7	13362.9
M565T237	24530.7	39453.3	44180.2	41361.6	55623.1	46801.7	37080.4	33106.3	45299.5	25577.2	5186.44	4153.35	3692.9	7615.87	7210.47	5846.04	3792.2	6294.87	2734.56	2832.02
M683T340	21693.6	18691.6	23761.2	20008.6	22722.8	19505.8	21240.2	19602	24231.7	20779.6	1527.14	1700.22	3075.46	1404.34	2130.96	1225.27	1962.37	1252.08	1817.26	1141.14
M431T227	10121.7	33344	42035.7	26214.4	54832	36701.2	46064.5	34673.7	71282.2	31465.9	453.491	871.69	597.291	755.613	554.534	686.411	638.056	678.168	546.376	693.268
M346T223_2	4018.19	3299.36	3362.7	2034.34	3326.55	2401.8	3844.1	2323.04	2788.78	2663.98	923.749	931.113	1012.25	1032.98	942.041	586.144	801.428	650.317	734.261	767.433
M238T189	7425.25	4448	6236.51	6446.76	6311.94	7292.43	5448.87	6974.15	7406.04	7584.85	2043.42	2310.22	1803.1	1401.26	1187.68	2304.37	2011.82	1936.34	2224.85	2127.9
M491T369	20882.8	17861.5	36335.9	18769.3	18592.5	21246.2	22262.2	21338.4	20653.4	22773.5	7564.14	4145.79	7029.87	4833.02	6807.16	6188.3	8219.14	5350.97	7169.99	7070.3
M575T427	5038.96	3574.78	5736.49	5135.88	6594.42	6400.46	4366.32	5127.79	4417.39	5079.73	1745.19	984.673	1393.11	941.322	1491.08	1250.33	2069.7	1441.22	1305.91	1456.78
M359T413	25620.9	24563.6	21514.5	19646.2	21494.6	18532.7	17241.4	24689.7	25094.8	30603.2	6121.71	3265.45	4075.82	4250.8	3386.14	5029.76	3542.85	6564.39	5075.53	6846.18
M410T136	119918	59894.7	85295.8	104029	122991	78128.3	76585.1	76742.7	96095.5	86090.3	27377.9	27527.9	22212	34217.6	24403.5	27066.1	17901.1	29623.9	22078.5	30701.7
M439T136	12132.9	11580.9	5914.14	9708.6	9409.45	10587.3	9470.77	9606.36	12467.8	12183.4	2006.12	1639.8	1320.75	1955.52	1674.91	858.099	1516.77	2363.34	2229.6	2455.79
M619T251	89163.1	51474.6	58300.9	68566	56329	57115.1	56551	87591.1	66369.7	78803.1	19557.9	30057.5	20945.8	17433.1	15100.5	22868.1	17812	25489.5	18791.1	22234.7
M442T218	7908.86	3860.61	3932.12	4614.1	4510.13	6138.24	4866.32	5642.56	7020.96	4453.22	1021.55	889.1	955.982	960.337	780.31	1147.51	963.198	920.896	979.468	955.099
M318T299	25991.4	32093.6	35618.9	33293.4	30107.4	30729.4	33258.1	27502.8	24686.1	24712.7	1606.59	2478.65	1455.51	1220.95	1145.91	1165.42	1411.92	1056.5	2640.99	3104.4
M362T300	14992.5	42191.2	24038	37506.2	17348.1	36917.6	31665.4	29367.2	11950	27615.2	3130.17	2631.63	1784.18	3189.57	1420.83	3126.26	2006.25	2725.11	2067.53	3531.84
M569T215	22798.5	22216.8	27709	17091.8	29565	19266.8	21007.5	14749.9	21817.8	32572.7	6726.57	5698.83	7524.43	6218.25	7176.36	4608.96	4175.75	6437.13	6019.52	5391.62
M300T216	10788.8	8489.71	8361.55	7729.37	10087.7	15532.3	10949.6	9895.34	9221.81	11711.8	1256.65	1922.11	2361.17	1623.05	2508.29	842.452	1401.23	1422.01	2009.92	1678.03
M463T345	9078.7	8235.2	11934.1	7400.23	8812.42	8894.78	11545.2	9832.14	7416.1	12587.2	3027.32	2335.93	3717.86	2120.04	2366.68	2870.59	2328.34	2319.46	4196.46	2324.06
M366T364	147464	135997	121162	113372	141666	130240	126533	124618	146816	135505	17386.9	7697.91	9949.64	8135.02	13334.5	17219.4	10676.5	8609.44	12835	7911.51
M247T438	15219.2	17576.2	10868.8	36653.9	26361.3	26571.6	46992	28549.7	32346.7	29765.1	868.998	420.04	364.424	1547.88	1551.72	1367.45	1515.61	1643.39	1808.85	1339.6
M906T316	11560.5	10559.8	14096	8997.03	13149.1	8374.78	10644.7	9112.89	11878.4	8440.16	426.693	260.949	302.871	207.888	778.184	306.777	523.639	145.051	350.969	188.687
M609T410	9302.98	11504.3	7401.45	11100	7239.96	10324.1	10431.2	11266.5	6911.72	10428.4	3366.05	3379.81	2465.13	3689.78	3725.65	3229.24	2811.43	3272.04	2922.59	3504.8
M743T207	91061.4	117124	110350	94236.1	134188	64457.9	122673	135985	128402	144804	28323.6	18356.3	31182.2	16647.2	31977.7	16947.9	29312.9	15897	29732.8	18580.7
M208T216	24982.6	18109.5	17120.7	20229.8	19244.5	18845.9	16965.8	20337.7	24419.3	21016.2	1500.18	1071.16	1350.51	3437.89	1899.87	1293.55	1727.46	1134.47	2016.98	1034.15
M903T309	12782.2	9328.28	16169.9	15053.7	15062.9	12030.3	12911.7	11985.9	13732.5	2989.41	1044.4	647.712	1145.58	657.564	1331.6	628.19	1111.29	520.019	1224.61	590.528
M879T344	13377.6	12672.2	12497.7	12222.9	12029.7	13910.8	13027.1	12838.5	12834.6	14329.4	516.382	282.158	573.066	250.78	703.573	270.615	508.776	281.344	489.912	256.937
M464T221	2353.49	2110.6	2014.6	2505.59	2225.91	2084.74	3196.56	1858.61	2198.84	3351.38	951.562	937.271	1060.19	967.085	942.95	738.462	714.262	781.242	677.603	822.813
M233T356	66706.8	70803.2	65625.1	58370.7	56906.3	66666.7	65799.5	72725.8	82040.3	75322.3	21503.3	9230.79	16374.7	9921.06	15698.1	15468.7	14236.5	14912.5	16187.8	12322.7
M187T257	19614	21739	34902.9	35781.7	34640.1	38578.7	31930.2	30230.7	25160.7	32764.7	5468.29	8263.39	8911.66	9896.14	7987.97	10788.3	7989.81	9444.46	11900.3	9052.46
M541T191	62007.8	81637.3	71675	82297.8	65857.7	92047.9	82373.8	63845.9	75711.9	60992.9	4882.42	8310	5004.31	7510.84	5357.81	8247.1	5222.12	15092.4	4811.13	8040.12
M111T258	16340.7	24925.6	15126.1	25615.4	25779.8	22087.9	25517.1	16487.2	22632.8	15472.5	4443.91	5818.26	5429.06	5795.6	6626.45	6834.7	2954.3	4404.48	3484.08	5441.91
M383T364	45365.7	42826.1	27000	39752.3	34419.7	48033.8	48674.9	34831.7	39209.3	37767.1	4481.83	7089.42	9885.93	11923.1	10240.3	6712.42	9497.19	7881.56	9885.46	6215.96
M271T355	42660.2	27363.5	22887.6	32848.2	30230.5	39874.4	39914.1	30312.8	26143.6	46502.6	12049.8	5909.04	10820.7	6638.92	9633.95	6177.92	10226.8	5724.22	8654.01	7696.89
M272T342	1087.28	1571.38	868.676	1540.9	1090.37	1384.42	1549.58	837.819	1208.94	1580.78	405.343	387.073	304.789	307.747	437.131	427.489	409.779	350.881	303.625	260.123
M438T223	23615.7	14220	7299.05	10543	17355.5	29721.8	26158.9	14066.3	22548.1	20801.3	954.805	988.3	946.722	1214.17	1415.32	1295.52	1145.29	859.919	931.716	1331.03
M615T198	49887.6	28009.5	35905.6	41523.8	23158.5	21159	21159.2	35845.5	41768.2	47873.2	2388.7	7805.11	3993.5	5962.49	2710.49	3257.85	4147.24	6572.03	6181.54	3606.88
M255T426	13967.7	9491.87	12922.8	13953	14813.1	15692.2	14270.3	16971.4	17180.7	22125.3	5440.73	3730.75	4657.67	6012.05	5613.34	3890.51	5071.57	4804.22	6322.91	3798.52
M271T342	8389.71	12520.9	7743.83	12754	8906.4	10513.2	10933.2	10526.9	8397.27	11389	3129.36	1928.93	3932.33	1834.46	3142.67	1921.43	3155.94	2917.85	2538.57	3061.13
M411T197	16769.5	22230.4	22234.4	24582.2	17714.1	24348.6	20641.1	19158.6	18752	17051.9	1502.98	859.146	2280.28	2193.66	2970.14	2109.1	2747.5	2194.96	2501.35	2605.76
M470T497	4208.12	3976.03	4705.43	5206.41	5167.74	4290.75	4060.72	4597.04	3855.01	4341.41	1152.44	1731.92	1237.35	1420.62	1011.68	1722.54	1691.98	1802.57	1407.43	1159.9
M611T300	41004.1	32720.5	24662.4	31391.4	27394.3	24946.2	23285.2	27427.1	28605.6	30100.1	6435.34	6487.7	3148	5519.21	4532.82	6271.3	3402.58	6991.3	6029.13	7942
M477T213	52739.7	59178.2	55433.9	58400.6	59447.8	49378.3	60158.7	53883.5	54921.2	45973.6	7674.75	6016.45	9681.69	5467.33	9267.92	5016.08	9528	5121.94	9099.06	4713.59
M676T215	43492.1	26573	24156	18624.6	22651.5	29297.6	27832.3	27832.8	42865.2	25638.4	6485.29	4253.16	3897.38	5247.84	4555.45	5165.9	11284	5252.05	6517.06	7881.69
M705T251	188652	88139.2	192860	92520	192799	161753	99520.9	96012.5	223768	234842	15495.4	12773.4	16973	15779.3	18407.5	12546.3	16766.1	13178	20775.7	11864.2
M529T222	3454.86	4948.06	4350.36	4836.16	5251.92	2030.77	4168	4326.78	3692.35	3584.52	865.365	1055.71	1213.7	1344.94	1025.84	1048.88	863.283	835.798	851.102	846.904
M594T200	11277.8	7654.59	8028.34	6685.38	7159.92	7587.12	7318.22	7010.69	10123	9751.94	2639.54	4727.22	3387.46	3228.5	2679.85	3363.27	2914.71	3205.29	2709.57	3670.06
M475T285	14915.2	13750.7	17116.3	14811.3	17324.8	15038	16884.3	14859.7	21822.3	14121.1	2303.62	1671.35	2926.01	1775.05	3487.47	1986.43	3297.92	2956.2	3957.91	1784.66
M338T417	15291.8	11861	13606.6	17309.2	14985.1	13573.5	17070.1	16494.6	15954.7	15944.5	1115.32	1415.53	2206.59	2503.29	2785.5	1547.04	1882.5	1376.07	2595.65	2686.98
M557T238	41303.5	43803.2	43784.4	42023.1	43171.1	45110.5	38582	41436.9	44308	41906.6	3262.38	3458.17	3056.55	3951.89	2535.55	3317.83	3544.49	2307.11	7462.12	2776.38
M198T356	21669	16417	31022.8	18676.5	29255	15697.1	11409.8	11431.7	20832.1	14131.7	2289.49	4730.79	2556.91	4735.54	2064.02	3258.67	3473.31	3662.55	1838.57	3659.28
M389T198	37403.5	37663.8	44325	37508.1	42401.6	30981	34251	31744.3	35787	30809.6	4557.34	2040.86	6063.9	6272.21	6133.48	4885.07	6037.18	5274.15	4384.25	4742.14
M204T429	5998.74	15956.1	9686.27	6540.32	6599.21	9139.49	9952.79	9996.85	7073.01	5263.41	711.947	2310.82	1707.28	1053.37	1312.41	1640.38	1615.62	695.088	1249.23	1301.93
M576T215	6634.39	10955.9	8537.86	10664.2	10903.1	5373.68	8116.71	9946.49	7993.52	5406.75	1727.83	2459.92	1634.16	1937.41	1870.42	1852.12	1796.14	2456.53	2019.62	1764.05
M519T220	8460.94	13427.6	13394.9	15535.2	12270.1	11495	11468.3	10436.5	8678.03	8965.95	2968.08	5602	4783.95	4837.11	4035.81	3929.92	3596.6	3703.17	3123.4	3373.35
M692T216	3383.16	3634.88	3225.19	3443.22	5365.68	3577.35	2341.82	3362.22	3112.37	2929.93	937.038	834.722	923.09	848.535	1177.77	1427.63	879.429	1584.48	1344.4	1051.91
M208T323	589477	417954	741177	537230	109309	53783.2	286701	924775	752463	658845	4750.66	1532.33	4559.55	1046.83	247.796	306.853	4794.04	3208.2	4634.48	1128.4
M533T216	9310.31	5510.46	6387.22	6938.97	6866.73	6046.35	8597.73	8925.87	8227.24	10726.7	2623.32	2581.83	2233.68	2838.38	2241.46	2836.76	2505.76	3012.02	2453.99	3361.01
M374T444	3663.31	5356.36	4054.44	5407.53	4980.4	5751.75	5066.95	4748.29	3991.42	5194.58	1068.87	1571.25	1424.39	1722.65	1159.24	1503.2	1429.62	1760.22	2539.92	1483.28
M111T345	2512.08	2372.81	2126.09	2707.27	2207.39	2351.23	2536.07	2248.36	2266.54	3335.52	701.827	578.827	643.762	564.681	531.599	469.126	585.602	313.357	878.845	680.091
M342T124	86072	50106.6	91784.1	47259	57371	53599.6	42399.7	70595	80980.7	70791.9	24058	16689.9	19175.5	14539.8	18572.7	15237.6	10829.1	16012	23975.2	18695.4
M544T415	10874	13456.4	13388.5	13739.1	25903	13064.9	23505	14730	11917	14655.4	3322.85	3338.86	3507.94	2899.31	4150.62	4198.17	4134.89	3420.99	2934.48	3190.78
M987T319	4339.08	4897.52	5102.55	5281.88	5782.62	4103.07	4495.97	4676.42	3891.72	4616.4	1094.43	711.589	1312.21	729.507	713.812	703.067	988.581	428.39	942.112	708.332
M219T246	384661	418907	427332	366625	197532	36289.6	439175	808517	503522	541621	9522.29	4719.88	8157.91	4966.92	2064.08	2567.45	8030.85	9159.89	8371.86	6597.65
M160T309	13306.4	7576.38	3742.56	8241.87	11547.6	16055.6	13372.2	14733.9	19907.2	10902.9	1046.64	758.988	951.128	1410.76	1172.15	761.061	1191.88	682.652	1338.62	1124.3
M441T326	3215.29	4424.82	4557.1	4707.49	3935.25	4450.24	4966.73	5255.61	3932.19	4789.45	1360.3	2249.47	1802.61	2262.38	2080.66	2290.81	1893.11	1613.75	1889.25	2296.96
M409T136	514671	382741	460716	396599	475968	375952	382372	401510	489006	451177	99728.6	174637	105931	157513	97533.4	154891	99687.9	154770	99842.2	143177
M359T369	15773.1	14631.3	12631.9	18401.3	21071.7	19502	14920.9	17685.6	13804.8	14096.8	7891.48	3656.08	7117.55	4390.88	5385.23	4564.94	4867.13	4790.87	5156.5	6652.43
M529T219	21594.7	24202.3	16751.4	11581.7	15025.9	15395.7	16675.9	9611.3	17847.5	22398.4	3121.73	4801.94	4396.33	4784.14	4390.04	4199.13	3948.59	3812.38	3442.86	3235.9
M339T414	13053.5	13257.6	13511.6	14585.1	14066.5	14344.8	16801.5	14860.6	11318.7	14977.5	3391.39	4491.71	3886.73	5388.63	3521.21	4231.45	2751.11	4989.97	2619.92	4455.66
M323T316	9605.85	15755.6	16277.2	14023	10119.7	18793.8	20904.8	19917.7	9176.69	27221	1858.07	4778.83	2905.1	1872.15	1890.52	3339.23	2395.24	3912.17	3259.73	2411.47
M456T211	7591.79	15417.4	9005.53	16421.6	8344.57	9095.99	10003.2	16451	15781.7	8443.61	1545.47	1170.37	3203.76	1925.97	3963.68	2193.95	2199.91	1782.74	2008.61	1378.7
M394T366	13160.3	3088.63	10503.3	9324.3	11608	8869.65	5906.29	5042.26	4478.09	8692.94	1503.02	570.752	1181.11	1202.15	537.339	500.014	873.818	489.926	884.626	1128.85
M305T372	12985.4	10214.4	10898.5	8911.83	10723.6	12641.4	8784.32	14506.9	14455.6	13962.8	2590.45	2167.69	3295.93	2481.06	3260.79	3206.18	5942.58	2687.94	4010.29	2968.49
M545T356	51573.8	25635.4	43125	25383	40466.9	34381.4	34464.7	33372.1	49877.2	37047	11206.6	4261.85	8711.23	4627.55	8630.63	4429.11	9903.78	5347.14	8899.94	6330.14
M1055T518	6977.18	4923.6	8881.66	4739.01	5380.88	4746.91	3573.07	5851.55	3548.49	4203.24	766.729	1322.63	1804.74	1910.33	1609.65	1377.38	1001.56	1112.82	1220.38	1127.99
M727T223	640.099	600.056	519.439	470.2	349.168	432.306	312.57	408.783	437.598	299.672	142.726	90.4699	149.105	98.0748	119.985	107.982	64.8282	73.6432	76.7273	53.2388
M127T376	9951.66	9090.53	10120.1	16220.6	12095.5	10973.9	10429.6	12597.8	15765	12840	4507.39	5206.46	4474.24	4274.64	4802.35	4573.65	5608.04	4448.83	6505.48	4497.79
M206T234	16464.7	12947.6	11883.6	13873.7	12021.7	13825.9	13730.1	14828.8	12298.9	15831.4	794.05	1133.78	727.3	904.59	428.94	990.13	508.452	1514.42	525.741	1518.23
M422T231	1196.72	2848.82	1956.5	3355.6	2298.05	3064.82	3079.48	2328.85	1761.26	3535.78	478.604	701.449	439.601	420.446	391.364	514.879	407.337	546.392	425.111	635.501
M537T427	8217.2	7659.14	7648.54	4994.45	9032.16	6100.55	5943.1	6202.53	9673.05	8806.05	2397.68	1911	1147.9	2201.52	1847.72	1655.69	1758.43	2696.96	2197.86	3151.98
M373T342	1647.61	957.213	1474.5	1646.92	1432.44	1540.73	2089.48	1818.53	1502.24	1448.75	511.98	638.023	656.708	477.841	525.315	710.408	476.003	676.742	378.435	688.955
M273T355	5287.49	3777.81	3128.13	6542.87	6594.46	6117.44	4407.28	4408.46	7403.21	6668.49	1719.45	733.897	794.847	1140.35	1855.88	1043.03	928.939	1275.09	1626.45	1314.24
M595T299	80910.9	81933.3	107212	82714.9	93009.1	78928.5	84937.3	73806.2	83969.3	71428.4	7342.34	3745.87	7608.2	2748.71	7550.13	5164.38	7980.8	3724.32	8031.34	2774.65
M593T201	28575	23473.1	13981.1	30037.4	33629.1	18583.4	31555	46362.9	22362.3	27453.9	4252.17	6966.68	4055.91	6485.95	4272.7	7193.98	5595.59	7796.39	5303.19	8603.5
M330T391	58842.7	49048.5	48808.9	47017.4	53226	49317.4	55525.7	63312.8	56651.9	55128.7	19642.8	13154.8	20840.2	14611.1	24905.2	14258.5	19968.1	15397.7	21992	15611.9
M593T324	10228.1	17159.3	12546.1	20051.9	14541.3	19147.3	11252.9	10673.1	9698.18	14319	548.65	2697.64	1475.77	2039.05	1479.77	1666.36	641.218	1199.06	962.082	1524.45
M433T209	4816.13	6355.16	5340.01	6716.13	4196.01	7557.36	8191.23	8253.19	4168.43	8655.15	1560.23	1118.02	1265.96	1297.18	1301.95	1330.75	1487.34	1430.77	1401.62	1606.29
M725T180	43696.4	16650.6	39577.7	26471.3	33485.6	58995.6	53377.9	55751.4	53459.7	26384.6	5944.27	2651.91	3357.93	4029.21	6703.49	8984.26	7337.7	8807.55	4557.71	4079.06
M180T229	7158.58	8232.97	11327.8	8555.91	7385.77	17517.8	7839.29	5749.17	4776.22	12735.3	750.537	2388.37	1655.48	2053.08	1098.58	1898.35	1034.04	1406.68	1077.92	793.978
M544T127	21737.6	19019.6	19657.4	39507.6	55860.3	58773.5	35286.9	15562.6	16871.9	30071.4	3274.79	2309.96	3211.76	3098.35	4420.39	2776.91	2986.45	1853.59	2645.1	1947.83
M630T214	35426.1	12922.1	10162.7	14791.8	12608.4	15665.3	12634.8	22969.6	18575.9	25791.9	3870.35	2253.93	3241.55	2639.08	3912.07	3059.37	4592.58	3159.05	1540.93	3095.8
M410T392	4658.35	7492.61	6310.91	6183.78	6947.7	6016.19	4741.21	6731.31	6049.58	9094.43	1852.86	2674.3	2800.09	2742.3	2993.23	3052.52	3079.13	2404.76	2624.42	2057.07
M257T341	10992.5	10939.3	10678.1	12158.5	11638.5	16584.6	12233.9	10660.5	10473.2	13935.2	5366.38	3584.87	3638.52	3650.82	3554.2	3583.88	4069.95	2964.53	5878.31	5764.11
M246T339	1232.25	915.025	1325.99	981.783	1032.37	1244.76	1339.06	569.586	1825.77	940.183	23.3681	15.798	76.3013	33.6001	48.1174	13.0817	97.9251	13.7134	49.2515	24.8227
M539T222	6030.5	6395.62	5470.41	16265.7	6602.98	5435.09	5722.77	5293.56	5681.48	4869.75	1182.48	1388.36	1618.26	1169.18	1678.8	1139.38	1437.86	1137.3	1183.36	953.135
M557T505	7526.89	4195.18	5387.38	4262.39	5627.61	4981.69	4023.05	3217.63	6138.33	4696.46	1751.19	1208.18	2337.25	984.007	1900.1	1524.15	1309.11	1703.26	1371.13	1076.9
M745T225	13296.9	11285.2	14089.7	11955.1	13869	24227.9	13754.8	10871.7	5770.36	13542.3	3079.67	2977.56	2843.14	2452.09	4462.08	3461.1	2592.4	1579.15	2140.46	2592.38
M304T313	30789.7	41409.7	23225.5	35974.6	20331.6	33695.5	20998.5	23497.4	35885.3	39474.3	3923.74	3995.72	4055.8	4297.56	4179.86	3828.45	3326.91	877.777	3743.26	4027.88
M162T132	101639	46069.1	39180.2	53424.7	42906.1	82604.3	117998	159270	130527	172528	6877.92	4166.94	5184.7	4180.81	5967.04	7165.75	11695	9900.39	11634.4	8358.92
M573T262	59341.3	31716.4	36977.3	42644.7	39384.2	51018.7	44480.5	45391.2	38417.2	46796.2	13822.5	15590.8	10312.1	15409.8	18402.4	19267.7	10738.5	18847.6	10757	17859.7
M340T414	13829.7	14146	10375.3	13254.8	31999.6	14301	15830.6	21353.5	38035.7	53869.3	1100.26	2512.13	1674.26	3389.89	2469.28	806.048	2177.72	795.776	1855.04	2385.45
M775T268	31833.1	30409.8	36549.1	41014.4	39103.8	37838.8	37587.5	29238.1	32973.6	31331.1	910.981	1982.77	3735.63	1298.63	1761.46	644.06	2736.41	1313.28	2093.54	1295.18
M679T249	45513.1	71573.5	45382.6	43684.6	31449.9	37279.6	37034.3	39070.9	32661.1	47306.5	9011.45	2682.67	8883.91	6281.83	5674.09	9647.03	8044.33	10667.8	7559.8	5456.42
M168T169	95581.4	36941	77852.9	43492.5	88446.7	61195.3	67231	66644.2	96129.2	74256.7	6502.95	1781.14	1969.42	2818.8	1103.19	3076.67	6496.49	3088.61	6665.15	6324.6
M234T121	1.21401e+06	1.37309e+06	557911	261159	467574	823901	1.05988e+06	1.84141e+06	1.69463e+06	1.65027e+06	37837.1	39956.8	35322.8	13891.9	50721	38365.2	60123.7	73148.1	130015	102926
M272T212	15709.8	16723	11551.2	20910.8	12205.2	20945.6	12314.9	20896	13045.5	19030.1	1149.02	3434.33	3277.46	3782.29	2922.14	2920.79	2235.36	2030.67	1135.33	1869.64
M397T223	3281.79	7900.93	7209.19	7041.47	6495.34	5503.36	6690.23	6477.35	6007.58	7467.16	1909.63	1753.78	2184.46	1632.18	1859.98	1615.06	1910.11	1645.06	2069.73	1695.99
M465T339	1980.27	857.05	1395.2	1534.03	1696.43	2181.28	1275.88	2274.2	1253.25	2096.37	370.7	194.696	273.417	168.23	289.088	307.295	346.126	529.037	519.901	392.147
M1051T501	4053.05	3643.44	5684.6	3056.7	2179.01	2403.34	3206.33	2847.65	2628.5	4359.16	1043.17	1227.32	1088.61	739.373	764.514	618.639	1059.66	1107.8	939.874	1018.35
M529T415	28554.7	23185.6	12321.7	22574.6	15152.2	12546.3	36716.9	13097.6	15313.1	14869.6	2530.5	3308.38	3651.03	4371	5949.21	4265.7	2907.21	3117.86	4363.39	2779.73
M379T219	34764.5	20479.1	20092.5	26663.4	29691.2	31676.5	24596.9	32136.4	25032.4	34441	2964.33	1049.85	2771.5	1626.4	2633.73	1646.82	6768.11	1728.47	2386.93	1611.93
M420T153	101198	91321.7	80603.1	80247.2	87814	88399.7	76224.5	94815.8	90640.8	104968	27414	24843.4	16579.6	26342.5	18919.4	40329	19994.9	31811.7	21557.2	24569.7
M233T266	20411.2	27893.4	19718.5	39041	16967.7	29469.2	38131.7	34830.5	19525.2	25985.3	7007.68	8218.52	6644.95	6201.56	6175.8	7832.28	10492.1	5632.19	6815.06	7250.64
M759T352	14356.2	7429.12	6495.18	8700.54	12794	11082.7	9223	12985.7	9571.88	11556.3	1883.63	988.094	1508.36	1460.9	2934.01	956.887	2885.83	2691.45	1826.02	1177.74
M443T223	11325.8	14186.7	22375.6	26191.6	14593.4	12747.3	14454.2	21835.6	17407.8	10980.9	3328.96	6231.32	4936.53	6165.18	4753.79	5543.13	4177.18	4737.65	3242.06	4223.51
M591T194	37791.4	27636.1	56006	35564.5	36627.5	35154.1	20934	34402.9	47636.9	37990.9	6486.84	14201.1	12811.1	14208.9	12065	10344.1	7302.55	12660.7	11893.2	9227.93
M384T219	22620	146394	153475	146318	147332	15926	163844	158677	153197	21316	2266.83	705.832	3493.65	822.582	2874.53	761.184	2366.23	687.807	2096.34	622.509
M879T426	7859.26	4480.23	3494.9	5028.24	6014.3	4500.4	5053.8	4067.34	5513.19	7414.21	1597.08	691.914	642.635	1295.66	1322	1115.93	763.428	960.515	1061.74	2114.89
M513T407	7759.8	16637.4	15962.2	12036.7	16211.1	8558.86	9238.59	11162.7	8371.05	11262.2	3417.25	3906.68	4126.3	4199.85	3851.04	1621.86	2818.14	2900.79	2884.32	3094.33
M723T317	56843.6	58247.6	69296.8	32030.2	63416.2	45936.6	50905.4	47357.5	60361.5	48341.6	14115.1	6745.54	12829.9	7521.05	15374.7	8372.2	15977.9	10044.6	18994.5	7798.6
M295T391	11693.2	10139.3	12433.6	9931.26	9964.37	8988.48	9689.27	12497.8	5261.88	10122.3	4199.46	3099.39	4667.05	2981.55	4316.74	3177.4	3904.7	3032.09	4122.53	3053.47
M591T177	122554	119732	85672.5	116387	174304	81271.3	59964.1	84420.4	160005	83715.8	29267.9	19584.1	30543.3	42579.4	18385.5	12128.3	15937.2	13432.5	19503	16849.7
M620T251	35507	14357.1	16975.7	20301.5	24615.1	22929.8	22103.2	28902.8	27232.1	30614.6	6204.8	7234.98	7948.27	7622.78	5954.12	8324.06	6122.11	8598.09	8292.09	9862.82
M397T375	367516	363811	354491	374354	362433	349652	366018	348249	361967	377866	48551.5	15319.9	44832	31243.6	39510.5	30205.4	24865.6	18375.2	49854.4	23621.5
M179T171	59074.6	130320	38125.2	59686	55283.7	88954.7	77419.4	128033	88661.1	98292.1	22377.3	13654.2	9940.98	11834.9	18879.5	9327.27	22790.3	22164.6	15790.9	15295.6
M527T415	62185.2	183492	200649	171957	152754	531818	203218	231691	206099	342300	8192.29	22600.6	21629.1	20968.9	23720.6	23419.5	28712.8	31890.5	29852.6	16986.6
M607T296	15610.1	15432	16082.4	6863.79	15252.1	13338.3	14089.1	13617.1	14235.2	16315.4	4530.18	5855.45	3262.42	5643.06	4799.03	3585.67	4147.89	6329.58	4319.2	6239.47
M718T323	7482.76	5331.84	7747.2	7330.52	7079.71	5296.92	4960.36	7564.27	8906.27	7061.17	2071.5	2012.69	2047.59	3209.02	1494.68	2093.09	1693.63	3785.59	2178.11	2457.03
M555T165	91570.2	81094.8	132653	82041.4	73501.7	133145	59429.7	117883	109638	98250.8	5525.73	8595.25	11430.7	13551	10161	10707.9	2429.49	4770.71	2876.21	7912.91
M206T177	2304.51	5426.3	3534.66	4932.27	3027.43	5220.38	4519.44	2440.55	2755.26	3884.14	819.468	917.505	882.849	1131.38	928.282	1626.03	1379.53	718.417	722.53	559.284
M357T165	110042	92080.7	152313	135721	113566	133173	83328.9	160634	159211	162621	25435.1	24152	31035.6	7899.12	23765.5	21853.1	24697	26042.6	32762	33286.1
M135T134	81537.5	45640	39729.2	55487.6	57071.4	54163	65038.1	61628.9	56871.8	74354.3	25249.8	23575.9	20365.5	21736.9	22460.6	25932.8	23259.6	27097.1	25365.1	29672.8
M253T152	108656	51045.4	101730	52113.1	93594.2	44745.1	50242.5	36279.4	110998	56790.3	8167.91	9604.54	6430.41	13341.6	11296.3	11411.9	4104.31	14077.3	4734.63	2793.15
M375T236	6561.18	3500.2	3870.34	3444.33	5067.68	6058.76	4950.51	3333.59	4784.51	5699.53	2191.8	1242.13	1347.07	1365.37	1819.53	2302.15	2233.67	1646.72	1512.88	1475.65
M479T359	8895.02	4119.62	7180.54	5964.74	7104.95	4722.54	5297.38	4912.46	8279.47	5089.09	1460.24	2018.05	2166.4	1747.43	2254.56	2505.65	2675.23	1971.57	2883.99	2411.52
M140T272	9492.08	11369.1	14606.2	9629.29	13173.9	11264.1	8825.53	7258.02	12219.8	6802.13	4243.93	4590.38	2863.44	4361.31	3385.37	3498.71	4313.23	3262.08	3758.01	4784.27
M295T248	16053.3	52861.4	40321.6	41060.1	27598.8	18493	22782.2	16774.4	16368.8	15769.8	2500.34	5012.59	9856.35	2682.86	4109.89	4490.45	2828.94	2461.06	3842.93	2304.26
M703T224	7836.07	7737.24	8274.87	9768.32	7715.13	5401.06	6754.84	6148.54	5951.43	8989.15	2477.32	3468.62	3287.42	3603.21	3467.99	3159.5	3278.06	4874.36	3368.76	2446.29
M540T490	2647.86	3285.21	4090.44	3760.91	2772.52	2609.29	2258.32	2740.17	2288.79	4910.9	1037.11	1471.25	1011.98	1152.72	841.393	957.812	1085	1107.93	1189.92	1400.25
M711T319	16142.9	66467.6	35943.6	64981.2	37608.9	45950.5	46298.3	37815.6	15834	43383.7	2613	2325.16	2902.06	2476.23	2473.74	2640.99	2517.5	2673.49	2621.34	2360.54
M358T166	38198.3	39138.6	14929.3	34408	36973	20955.4	29066.3	37085.7	35810.4	39062.9	4200.05	10215.3	8684.18	9237.48	7335.16	10309.7	7409.13	9999.65	9192.3	4115.93
M918T496	1129.26	2721.64	4031.9	2286.86	983.133	873.132	1626.51	1328.05	1229.21	1510.9	161.085	564.841	232.19	278.873	153.733	181.622	279.042	158.371	351.434	230.21
M612T315	10746.3	11221.2	8458.37	8597.36	10141.4	12709.2	11517.8	8800.93	7107.47	11538.7	2612.85	3305.22	1361.45	2782.52	2960.58	1238.36	2502.8	1928.83	3106.65	3200.69
M357T417	19639.9	19599.7	17202.3	24388.7	20647	24975.1	22178.5	21266.1	21628.9	29512.3	77.3908	454.132	498.197	590.163	160.902	527.707	741.221	629.661	202.232	100.173
M629T490	8512.97	7096.77	18302.5	10222.6	8513.11	5602.04	14334.5	10277.5	8004.28	5187.74	3325.09	906.018	1546.99	2278.84	1630.93	1806.24	2520.78	2717.79	1887.6	1876.38
M1014T516	5061.12	15197.8	15947.9	4355.91	7442.36	14043.2	5484.45	6386.84	7996.28	7622.28	556.424	2994.34	1017.32	1072.1	1032.52	1632.66	672.513	1854.25	1094.11	1063.31
M141T148	98110.3	109166	110387	97228	95633	96732.7	93100.6	102967	94285	95376.4	8652.74	20420.4	11285.3	19688.8	8427.71	20146.6	10193.6	18205	8233.94	17064.2
M503T219	25130	17997.6	53448.4	32798.5	48499.1	20902.5	39365.6	31625.6	37460.5	27056.4	7118.12	8696.32	11421.8	9985.76	8038.78	7500.68	9741.3	7489.52	7045.77	6086.48
M379T133	8779.89	16747.7	25029	23596	25420.4	27163.8	9956.21	11436.4	16122.9	13874.3	1672.24	4034.68	4329.71	4050.79	5713.21	3021.15	1547.97	2665.41	3104.76	1961.18
M489T221	21110.4	38422.5	39197.8	27352.8	36100.5	35375	42244.5	27619.9	19911.9	46054.9	9436.31	3544.38	4758.21	6202.95	10145.9	9831.67	4293.08	9414.31	9514.21	9385.32
M483T342	2005	1192.19	1571.47	1403.86	1785.79	1942.24	1372.61	1192.59	1970.32	2310.85	685.237	446.538	710.266	663.433	462.187	578.272	246.262	490.257	550.717	568.324
M627T464	7290.79	13574.5	11409.4	9857.59	8041.54	12853.9	14090.5	11901.6	7582.52	11517.1	862.505	1194.16	1614.48	769.462	1042.74	1802.09	231.438	1184.07	1039.03	1399.15
M461T197	86429.1	37733.4	204051	34198.4	150972	31184.5	56528.1	49472.8	113925	59620.1	2985.55	8251.73	5543.29	4531.88	3601.21	7748.62	7922.31	6134.8	5674.73	6526.33
M573T239	19594.3	29130	40402.4	30132	39752.2	31538.3	31515.6	25883.3	20595.7	17143.6	4666.57	10009.2	6509.35	11680.6	8991.66	12012.4	6315.87	9695.98	5576.52	5983.99
M606T431_1	3531.82	2906.02	4449.49	2716.39	3670.37	3469.21	2410.98	2740.99	4163.34	3114.39	161.879	219.018	81.9655	122.947	45.8296	98.7507	138.82	61.9444	136.615	14.8284
M694T409	7647.82	6955.91	6440.31	7096.79	5105.22	6073.49	6728.12	5382.61	5660.45	6027.98	2493.5	1915.79	2739.37	1712.01	2884.37	1529.47	2862.42	1442.76	2768.61	2251.15
M633T251	39319.8	28028.4	23706.2	27288.4	24163.3	32292.4	35343.7	44586.1	28830.4	44611.9	7535.63	7469.9	6153.97	3835.62	7072.74	8054.62	3027.03	9006.4	10919.2	10350.6
M254T355	9159.72	5534.85	7364.81	7173.82	7477.02	1333.24	9332.47	5933.84	5269	6241.57	1545.95	481.242	674.51	740.438	792.995	564.771	822.488	547.098	793.251	1029.09
M207T346	1573.66	2289.53	2151.27	2792.54	2560.08	1864.35	2600.43	2276.12	2348.51	2146.23	353.464	678.616	418.704	519.341	814.941	595.246	796.987	762.248	701.693	303.43
M545T414	9106.48	13311.3	9880.56	7975.17	6984.15	5913.41	4297.19	5366.67	4034.4	5021.33	2378.98	2146.25	1634.77	2438.2	1589.25	1664.83	1326.94	1163.31	1427.1	1199.32
M727T229	8287.32	7271.27	5121.78	8103.11	8704.63	9292.54	10311.8	8827.92	6921.92	11373.4	4194.32	2968.59	3278.59	3782.3	2955.92	3216.43	5333.49	3328.56	3059.18	4353.19
M336T139	32679.2	51022.7	25948.9	49849.2	26616.2	47539.3	51034.9	48409.3	26081.8	55068	6611.84	4627.29	4544.82	3797.79	4519.17	4185.38	5281.5	4298.95	6118.21	759.949
M270T342	3840.79	6088.61	4629.11	6162.41	4399.69	6503.28	6619.81	6260.84	5082.4	6185.77	812.354	2043.25	1726.92	832.917	1601.38	1427.01	1256.24	1815.94	2422.94	1382.88
M423T193	15881.7	14509.8	18139.8	9896.19	15721.7	12560.3	8111.09	18519	11536.5	13116.4	4331.59	5930.16	4826.97	4541.84	4770.24	4962.61	4046.56	4133.39	4867.2	5367.97
M543T134	5807.31	2834.13	3510.59	5221.85	6232.76	3212.05	2967.82	5418.73	5780.6	6900.25	1286.08	903.434	898.138	1415.61	1964.49	1631.04	1560.53	1353.24	1559.73	1283.03
M449T215	1874.36	5392.31	4983.67	5425.77	5579.81	4627.69	4982.81	5246.24	6294.69	5201.43	953.779	1270.58	1103.48	1333.47	1083.43	1159.95	1054.79	1327.21	1120.88	1131.02
M755T193	58141.6	64148.3	85489.5	70797.6	64871.9	49025.3	39872.1	40473.5	45483.9	57124.1	11842.6	8044.38	17219.2	15314.1	26221.9	9057.39	9160.71	9506.13	19954.6	8000.84
M290T257	52010.5	72765.1	83708	67276.1	67769.9	67471	68872.9	62138.9	61956.8	60980.4	23220.1	12080.3	24369.3	18273.1	28785.2	13976.9	22330.9	14157.3	27780.8	15338.6
M436T180	11760.8	22667.3	32351.3	27975.3	19945.6	18396	17820.7	19061.9	22018.3	29012.7	6857.46	8645.11	8819.88	5158.48	8149.07	7290.36	7004.45	7804.82	6675.67	7504.26
M325T328	5873.64	6330.93	6849.31	6967.15	6519.38	7370.22	6068.63	4615.5	6140.62	3740.15	838.743	1348.07	944.611	1332.22	863.352	1275.77	1146.65	1304.9	3677.33	1347.81
M529T223	642.634	793.35	766.78	733.66	716.936	473.065	180.278	499.721	593.088	246.4	97.5611	146.037	138.664	86.3387	67.5141	121.092	85.6654	41.4594	56.156	79.793
M280T228	13795.9	6372.54	6051.89	11753.7	4983.2	11544.4	11656.6	4717.21	7285.43	3875.26	915.309	1174.17	1529.64	1280.69	1103.31	1053.92	1485.62	1259.02	1475.83	1341.36
M475T200	58344.2	23303.9	27974.3	31394.4	54988.5	41538.1	19532.7	17724.6	38002.7	52404.6	9723.86	6462.99	5943.41	9984.68	10974.1	6197.81	4255.07	5651.24	8078.05	10395.5
M156T272	3400.93	2794.2	1917.05	2802.74	3326.84	2785.4	1980.11	3383.81	4253.46	2702.75	1088.42	1248.76	949.653	1106.74	1004.87	1004.35	1060.47	1803.77	1686.5	1129.46
M750T226	4468.1	2235.4	1658.84	1836.41	2135.5	2853.13	2312.05	3665.61	2964.47	5994.35	470.377	720.738	553.55	611.297	740.355	753.562	803.266	831.58	475.92	592.736
M544T198	19860.4	18574.7	44957.6	17991.5	21492.6	46910.3	47031.2	17348.7	48186.8	21339.2	3537.29	4063.38	3308.01	3668.31	4579.86	3826.65	3415.56	3794.53	3798.14	4617.08
M161T159	107681	130448	116312	119583	116715	226228	111128	126542	190932	137066	14028.7	16425.8	38949.6	28557.6	34251.2	22890.9	7173.46	14770.3	9763.88	19525.3
M1117T324	6549.6	7671.84	7738.96	8016.06	8402.41	8247.18	5718.15	5806.46	6297.03	7067.12	319.947	76.0853	536.13	331.028	152.211	42.4211	113.496	309.319	247.519	62.3905
M197T360	4046.91	3898.94	3420.67	4002.71	3251.16	4168.85	4874.89	4089.68	1917.22	2893.23	520.422	1355.39	1471.62	1091.03	1387.47	1430.32	1600.78	1034.16	1074.25	1019.31
M201T173	29361.7	63901.1	37252.6	68130.7	40697.9	70406.5	101515	61885.5	39453.7	58050.6	9850.79	15514.1	14918.2	16707.4	19645.7	10986.9	15798.1	12393.2	14940.9	21313.9
M425T321	4596.89	20951.8	12748.2	14381.5	14863.7	20524.2	15942.4	18535	11098.2	18133.9	2663.67	2004.54	3094.01	2768.18	2935.01	2665.89	3172.4	3430.28	3851.54	2139.15
M453T332	3869.11	5258.4	5803.76	5223.9	7964.85	5160.73	5773.73	4116.23	3508.41	4323.06	1935.87	2287.74	2275.19	1967.07	2483.62	3136.6	1733.24	1911.2	1225.35	1812.35
M749T226	7310.81	3219.85	2450.41	3985.17	3117.41	5540.59	5127.39	7029.59	5198.83	11070.7	609.793	836.081	633.542	778.908	766.491	769.33	774.641	888.011	853.927	792.378
M477T264	10969.2	17937.2	16743.5	27217.1	9532.93	15749.3	17402	16535.2	13778.1	17078.6	4855.42	4935.25	5232.94	4807.89	4901.17	4426.21	4736.45	4784.38	5242.83	4177.29
M558T239	12189.7	17533.9	12400.9	15478	12565.9	12797.6	8242.04	8313.39	13133.9	21452.1	2121.34	2739.88	1438	1440.02	6595.16	1594.45	825.208	2306.01	2238.84	2024.71
M179T285	37241.3	28347.8	38108.8	28842.3	38721.9	29794.4	28857.6	30712.9	42270.6	29170.3	959.999	2010.98	4725.07	2120.78	4995.37	2162.21	5041.65	2485.25	6842.97	2335.31
M208T134	70296.9	47154.5	51882.6	54487.4	49941.6	50869	49616.1	53976.8	60288.7	62109.1	16607.8	30920.7	12112.2	22481.8	15037.2	23743.4	16214.5	25404.9	17926.7	22373.6
M689T494	45357.7	52254.2	244242	108329	43867.2	52905.3	122594	162274	42826.2	162560	10153.1	5602.67	9605.34	6319.88	17456.4	5788	8514.06	10512.4	7535.6	10076.9
M422T160	39731.4	41539.7	67738.1	51699.6	78741.4	40928.9	59955.6	87832.3	61589.9	43598.6	2525.43	7711	2474.83	8400.05	1566.87	2675.85	1207.58	546.951	1033.09	2102.2
M449T207	5424.88	8923.92	4364.19	8488.22	4469.53	8270.04	7622.93	7233.67	3141.24	7051.59	1331.82	1980.43	1721.05	1717.68	1772.71	1559.28	1577.25	1736.11	1365.08	1566.54
M383T219	115601	109486	106219	141679	956769	82891	128536	949792	118388	105865	12969.9	4183.89	21922.9	3980.3	16904	3500.71	14633.3	3099.76	12671.3	3721.64
M576T182	41415.9	34485.5	39516.4	40502.5	47316.8	42083.1	22664.2	46073.3	36792.5	51515	5192.43	7026.79	9209.69	5513.22	4059.19	9789.43	7309.76	18457.2	7535.64	14208.1
M1048T516	3070.27	2997.89	2164.14	1959.64	1565.5	2463.8	3188.99	3144.56	2603.13	3033.47	253.667	373.833	133.284	128.823	333.69	338.874	109.049	480.176	280.162	733.871
M345T326	6115.25	8031.68	4992.36	6783.89	7747.31	11752.4	7635.98	8378.25	6084.93	10897.3	3819.89	2582.55	1519.8	1631.53	1254.01	3022.09	1073.74	1828.83	1573.97	2660.86
M561T207	28229.3	27069.7	25095.7	25544.2	24445.7	26672.7	31713.5	38987.6	34189.3	31825.2	11116.3	5460.87	9611.45	5232.7	11373.2	6613.78	13975.1	6514.17	11068.7	6490.74
M596T299	23389.5	24669.9	28436.8	23102.2	27638.7	23177.4	25845.5	23258.2	23390.6	22778.4	2797.8	1343.64	2696.03	1218.29	3190.24	497.302	3507.45	1817.89	2842.29	1985.74
M712T310	5681.78	14045.8	12479.1	16509.9	19652.4	12709.2	13824.9	17125	24895	14016.3	3166.09	3050.53	2903.73	2800.36	2485.13	3145.36	2782.45	3330.61	3304.86	3172.83
M757T407	3709.82	2613.83	2196.79	2204.86	2523.4	1895.29	1965.09	1978.36	2567.3	2383.98	1625.17	808.607	1028.18	950.33	1184.56	1092.29	1099.12	1035.97	1527.57	1222.86
M864T426	7351.6	1891.41	3412.73	3734.97	8058.09	4947.41	4292.16	2768.04	5506.09	4990.58	1272.18	719.646	953.894	1749.8	1037.58	818.929	799.298	859.937	1189.15	1058.03
M401T316	18565.9	28402.2	28554.4	18536.7	36716.4	26759.6	48106.3	19465.9	11114.9	17634.2	5397.46	9632.05	5134.47	3736.96	4707.71	7738.36	5222.64	4493.47	9445.75	2930.22
M535T199	40307.1	35415.7	34312.7	33787.4	30606	33804.9	32521.3	38441.8	30062.7	43720.9	15076.7	9094.69	12113.1	9516.89	13244.4	7516.48	14642.3	14151.8	16838.3	18206.3
M629T214	50974.6	22199.8	23007.9	27144.4	39858.3	34947.1	21077.4	32284.8	60738.7	45611.5	16132.3	6167.21	5196.68	6631.25	6577.45	7875.9	15729.2	9322.26	10016.5	9845.14
M792T309	9905.69	7551.76	9701.41	7027.24	6823.23	6992.04	6792.15	5933.01	6395.56	6817.6	3623.43	1017.88	1367.27	1065.47	2116.25	982.504	1002.86	845.49	1983.09	1094.02
M490T244	9077.31	9324.73	8129.12	8084.32	11109.4	8186.54	4592.39	6191.48	3515.12	3685.44	1941.78	2044.91	3525.42	1313.5	1598.41	1214.62	1500.79	1935.54	844.062	1660.45
M1013T515	10943.7	13535.3	25832.8	12729.1	17532.3	13463.3	12570	16719.7	17662.8	13988.2	2223.63	4241.47	875.129	2464.46	3395.29	2586.8	2316.27	5803.07	3566.33	2714.98
M320T429	6274.09	5520.21	8727.18	6866.19	5536.7	7272.94	5825.56	6323.19	5065.07	8574.15	899.417	557.855	1039.5	584.629	1028.38	2990.25	1279.1	633.172	1597.07	845.29
M505T266	35950.4	20339.7	34893.9	21565.9	29768.9	22455.1	21026.2	16601.8	24355.6	22664.1	11203.3	12566	13566.9	9685.6	10447.7	10370.6	9978.42	8015.13	11620.6	11170.2
M359T286	5893.91	6080.58	4577.13	8129.57	7277.32	4662.59	6182.46	4688.78	6557.86	4402.11	1946.32	3621.59	2131.84	2221.11	1196.43	1642.45	1555.1	2289.28	2645.46	1354.34
M433T247	24225.6	20614.3	14666.2	25822.7	30866	16662.2	22889	32449.2	42667.4	23014.3	9340.82	4232.49	7944.18	8143.16	10154.8	6218.28	9500.46	10276.4	11655.5	7565.96
M431T357	2356.87	882.519	2766.32	1448.2	3970.87	2089.36	2910.6	2299.91	2908.11	1412.44	529.667	430.63	445.985	390.237	585.156	715.293	440.325	544.573	397.349	362.839
M207T190	34927.7	28961	55483.4	24334	49375.9	25188.7	17486.5	21121	28518.6	17863.2	4223.71	5046.54	4694.61	4399.08	3706.56	748.419	1344.6	1139.73	2785.69	4958.39
M791T309	11210.4	15225.1	4149.36	14287.6	13009.7	17200.3	19828.2	13179.2	4531.45	16074.7	2863.11	1426.84	2841.79	779.942	2567.53	1498.17	3049.51	1289.04	2974.15	1392.34
M357T398	22962.9	55806.1	60759.6	50982.9	56912.5	49818.8	47149.2	40761.2	35703.1	25603.4	3107.28	14054.4	13828.3	8576.68	13252.2	8361.71	10360.1	10509.5	4454.59	6650.17
M415T286_2	9202.08	10393.8	12302.5	21881.1	24549.2	13315.6	13708.2	12344.3	13831.3	9711.33	2378.52	1857.1	3589.39	2259.62	5065.27	2395.31	2336	2613.97	3280.29	657.917
M649T218	7072.77	8762.41	11664.3	11943.3	7551.53	3718.9	9407.48	5602.19	5265.56	5337.2	1305.99	2963.13	1907.97	2566	2364.82	2859.46	1568.4	2907.76	1638.33	1636.77
M505T201	44331.1	55623.8	57593.9	55270.3	56058.2	58957	52878.7	56105.6	51720.8	58944.2	11369	5663.88	11179.6	6477.8	15849.9	6263.11	11647.3	3095.76	10401.2	7271.71
M263T362	7307.66	7511.65	6214.76	4607.72	6899.14	5979.29	11837.5	7955.34	6790.16	6023.86	2527.6	2966.13	3071.16	1956.97	2991.19	1401.11	3936.16	2658.4	2570.18	3405.93
M219T429	7401.61	9311.36	7826.45	7058.8	9947.28	6314.34	7599.17	4611.22	7973.31	5630.87	2892.1	4355.53	3211.53	4661.55	3593.73	3825.78	2907.88	3061.1	2738.92	3674.66
M182T271	2132	2709.43	2682.55	2514.39	3941.97	2207.45	2249.19	2374.86	3494.05	2025.3	1092.56	1318.7	786.737	827.911	1097.44	1605.74	891.045	1120.2	736.237	1526.7
M341T250	32938	43782.7	53615.4	24810.4	49707.7	48107.5	51281.6	21047.5	15274.7	34299.6	4411.8	11548.6	6938.77	8279.7	5469.63	13806.2	13876.2	5322.67	6886.81	9855.38
M605T313	27410.8	14808.3	28883	15437.6	24981	7855.54	21696.5	12554.1	23183.9	6571.99	4341.38	2382.06	4094.81	2363.1	2766.5	2266.61	2828.71	3001.47	2608.96	2485.32
M339T166	46942.4	77885.5	85715.6	77310.2	46498.9	88038.9	103502	52147.7	56602.3	30135.4	14397.4	14871.2	18993.9	15626.1	18049.9	16428.7	17453.8	14351.8	16156.2	12639
M455T313	13134	5815	12073.6	9332.85	14600	8495.92	8218.58	7055.73	11718.7	7631.05	3817.11	3005.78	3060.43	2178.26	5074.71	4681.93	2626.99	3160.55	4286.91	4116.12
M625T276	27326.2	4678.88	31217.8	20653.2	20576.6	24288.2	10810.2	7594.5	35326.9	20972	1779.28	2005.87	2053.84	1951.76	3091.84	2616.87	843.703	2574.61	2271.81	3295.65
M207T134	830561	533130	619687	505707	643665	637697	612479	610188	802781	732827	179310	225289	141675	248574	158744	270022	172803	396826	185471	320683
M744T211	23432.9	27240.1	42042	41606.8	53450.2	26969.8	32304.5	56547.3	47548.7	26192.9	6978.64	7845.43	16875.1	9093.6	14227.8	7270.52	14058.3	7370.64	11585	4058.06
M745T212	3825.11	6647.47	5355.6	1957.6	6766.3	3239.48	5353.25	5701.53	11526.4	4166.69	728.85	1304.54	881.651	756.73	1044.93	902.913	826.252	748.633	726.868	3206.15
M411T155	344775	845453	644954	880738	318798	401248	657375	347240	529156	612763	111510	195689	123960	314366	117086	159021	127218	172327	162984	158404
M341T123	712874	498554	167034	424722	333503	468357	268615	314531	386298	587978	105510	81682.8	102662	50426.5	105200	91055.2	36101.3	98254.1	166192	39254.1
M305T215	571.658	980.464	509.201	712.844	725.537	914.901	507.849	943.574	1140.32	367.187	338.519	292.734	185.091	164.509	255.81	177.039	188.015	299.971	146.157	241.406
M582T473	1286.46	1759.8	2248.55	1962.38	2269.16	2682.15	1537.5	2547.67	1667.69	1759.03	856.764	894.027	699.208	1149.68	1011.3	1105.81	838.185	826.385	1081.44	910.327
M475T222	29433.3	129033	33221.9	146702	34166.9	117184	120778	111470	28284.3	156240	5351.05	5574.25	7135.18	4396.68	7050.04	5225.7	3692.51	4234.84	5667.46	4113.84
M546T356	9767.13	6610.52	10268.2	5805.69	8593	9127.07	11465.3	9652.3	10803.1	5977.87	4135.05	1473.85	2002.74	990.16	2967.58	2497.4	3855.08	2244.66	2077.31	1789.65
M599T190	52306.2	22741.2	42442.7	45826.4	56719.1	40068.2	33818.4	26980.5	38028.4	38505.8	9541.25	14577.2	5124.03	10846.4	3257.81	9984.08	5871.18	4260.15	8716.1	13972.6
M737T302	11289.1	12818.9	8823.32	16225.8	12252.5	15431.2	13325.1	14663.6	17318.3	19617.5	1088.43	592.852	970.456	1293.89	1392.38	211.067	207.573	1617.26	1773.3	1165.54
M230T216	3643.67	8587.44	11969.1	10463.7	8848.61	3692.21	3396.57	8113.1	13764	12418.9	1810.01	970.546	910.628	1124.4	1549.38	1239.15	533.385	1790.82	2430.6	2205.51
M110T138	8128.09	17347.1	9362.79	20533.6	13516.6	28278.4	25387.2	23115.4	10206.6	19760.2	2605.6	3420.98	4105.27	4204.9	4457.62	4395.68	3904.13	3616.55	3476.76	3050.81
M157T171	12354	16428.3	13945.1	9244.34	16809.8	7410.16	17435.6	11972.2	17245.2	11267	8116.19	2606.1	5943.65	4936.91	4382.33	4975.2	3976.76	4270.38	3504.78	2594.25
M476T222	8923.3	28390.1	10048.4	35278.1	7741.92	25530.6	20055.5	20783.6	9273.86	17925.8	2093.6	2100.85	2392.89	2696.21	2548.26	1988.79	1799.38	2265.23	2275.19	1935.09
M291T257	6736.13	10581.5	6193.6	4252.8	5087.06	5950.18	13342.4	7889.25	4482.47	6335.67	3829.98	2091.13	2665.51	2020.69	1850.9	2724.42	1447.12	1739.72	1518.33	2372.94
M236T327	1220.71	6233.51	5833.45	7221.6	4379.32	5672.71	6201.46	6469.81	5054.79	5089.29	730.353	950.977	914.278	816.173	615.209	736.503	749.277	845.635	814.904	721.113
M232T323	15778.8	1314.31	10800.1	13266.4	9541.29	19181.6	15348.5	17026	12421.1	1641.37	566.348	284.344	255.266	322.703	320.083	435.361	197.595	374.382	252.372	469.655
M385T291	14214.5	12651.1	12802.7	16454.2	13692.2	12404.8	13542.7	12052.8	10360	14918.7	2038.07	3892.06	6210.2	5155.27	3314.28	4802.13	4342.73	4942.97	3968.92	6669.75
M351T407	15509.7	11547.5	10856.3	11381.3	13039.2	11738.5	14652.9	20304.5	25472.7	29708	2041.76	1781.96	1957.49	2537.9	2859.27	2592.62	2896.62	5581.6	10364.8	3200.11
M359T125	72063.2	85264.8	78765.5	78885	113847	106933	89369.1	87349.8	91638.8	90545.5	66706.3	22645.6	24635.5	23330.5	34925.7	30749.6	29780.6	23108.7	35272.2	36439.1
M575T177	12859.8	18492.7	14833.8	21084.3	13554.3	19828.1	19461.9	19543.6	12701.9	19367.2	6514.6	6101.13	2938.76	3524.72	6818.39	5987.16	6384.3	5622.86	5322.12	2094.64
M529T445	11131.7	14979.8	11888.7	13518.4	16982.4	15456.4	13240.5	13454.6	10910.9	8201.45	6882.64	6314.93	5749.91	6348.72	5531.92	6315.18	6346.17	6800.84	6364.72	7001.63
M288T169	23210.1	116754	19873.2	125258	20604.1	132457	145809	133514	23482.9	141377	3278.41	4716.89	1504.63	4437.27	1601.61	3428.61	4278.66	4085.14	3988.59	3962.92
M295T257	36619.1	45996.9	27305.9	36812.8	42581.9	46664.4	47250.7	39645.6	44054.3	43920.3	10896.6	15598	15700.9	16246.9	22166.3	17307.6	14174.4	10838.9	18957.5	6836.28
M168T452	2229.4	1918.49	1528.21	1240.83	1635.97	1633.38	1441.68	1755.83	3074.49	2407.12	44.4247	399.266	254.642	350.074	205.324	225.278	285.28	360.62	352.269	157.328
M665T340	7489.72	14434	7393.35	4185.52	6501.52	6123.82	7660.27	10203.1	8849.73	5525.07	3283.45	2627.51	4303.4	2464.57	2162.73	2806.1	1767.92	3495.5	1927.89	2159.57
M408T194	6369.83	7724.27	5659	9394.63	4830.54	11508.4	12056.9	8871.92	4531.47	11794.3	1467.53	3920.49	733.616	1695.84	2135.82	2104.44	1598.58	2639.19	1164.84	2767.44
M449T226	3662.21	6854.56	2113.23	7268.01	5250.89	7259.37	7842.31	7273.16	4821.68	6185.25	903.25	1832.09	1613.02	1896.05	1628.44	1795.34	1539.1	2052.95	1530.54	1373.89
M544T224	10928.2	10012.7	11163.2	10175.3	12674.2	12439.9	11852.2	8400.18	11949.4	14024.9	4647.16	6951.43	5873.84	6133.87	5707.99	5651.68	4134.17	4943.17	2753.42	5660.92
M1047T516	5711.3	5759.2	6373.96	5984.03	5307.61	5551.79	6658.92	5795.55	5432.53	6268.65	751.158	436.906	243.124	930.295	866.923	984.416	296.325	1027.89	313.731	1333.98
M501T222	25228.3	33376.5	22884.5	36597.7	19969	89229	80673	33617.6	17834.2	34060.7	5114.7	7320.62	6016.97	13961.5	5891.99	6052	5926.89	6874.38	5853.09	5883.9
M551T198	29117.4	19805.2	51596.6	28817.2	29495.1	23181	21871.8	26102.6	24552.7	30702.6	10735	13008.5	10786.6	12810	10781.4	11387.7	11723.4	12736	11010.6	14287.9
M559T427	3518.15	2299.52	2472.83	3484.44	3925.17	4263.57	2104.15	2567.87	2890.63	3111.93	1383.45	458.322	707.625	1063.84	526.628	533.982	1184.56	756.003	1245.9	1302.47
M527T134	2412.65	3102.8	2574.33	1496.85	2708.31	3657.34	5233.73	3887.33	3625.7	2883.59	778.569	1083.92	959.986	791.843	1018.98	1549.13	1702.9	1192.54	1332.28	904.95
M197T357	2268.2	1135.78	2049.8	1727.11	1954.16	1348.29	1429.79	1533.5	2714.83	1518.61	913.768	471.522	944.542	560.521	846.624	501.797	651.174	375.349	863.629	701.219
M348T233	2615.71	1535.29	1093.92	1296.65	1245.81	2271.63	1457.99	645.677	2627.87	1546.38	310.049	455.505	318.746	488.885	331.001	475.772	486.094	568.898	282.115	732.307
M181T217	31686.8	80285.1	65661.6	42780	4357.75	45399	39728.6	42399.2	30798.2	36364.4	2421.03	2475.95	3136.22	2005.85	3460.94	2605.56	3284.47	2172.14	2870.76	1725.63
M757T386	16350	10402.2	18729.1	10975.1	17127.1	11391.8	11826	11385.5	16959.7	10628.7	6817.96	4234.7	2941.64	3998.96	6407.94	4180.83	8305.46	4088.59	7189.94	4206.27
M921T318	12005.6	19653.9	12310	21855.1	19803.3	6996.19	27845	18480.2	17935.4	7118.52	5576.55	1978.76	4743.85	2337.19	5484.64	3354.29	4652.19	2788.21	5534.07	2704.39
M435T241	258027	639348	223766	620541	181158	579505	701536	656538	216189	726215	61591.2	61689.1	52403.4	61692.8	49225	50765.1	51346.9	54199	58805.9	64858.2
M523T224_2	7119.41	13849.3	8587.26	8610.59	9398.05	11421.8	15142.5	21584.6	7122.24	13363.6	2696.05	3427.87	3260.18	3605.6	3476.71	3688.43	3249.26	3131.79	3171.76	3055.66
M315T363	5136.95	6020.48	4695.86	4805.16	3461.29	7131.61	6970.22	5789.65	2052.42	7266.35	2285.91	1455.23	1570.16	1461.85	1233.92	1433.18	1232.68	1825.01	1647.78	2104.24
M527T445	382367	250619	524905	692838	545185	353872	378062	317201	356047	110092	72320	59542.3	113782	164309	83329.7	69972.6	62799.2	78150.8	64752.9	97546.7
M409T333	4267.8	2165.2	6083.29	4901.3	5164.21	3424.66	1993.92	6526.21	6181.49	3410.81	931.634	1230.73	1633.69	2014.52	1186.82	1325.72	898.415	1270.28	971.593	975.608
M575T164	94436.7	93992.5	45801.1	101745	81693.9	121227	79576.4	115593	76646.4	99113.1	11324.3	14008	12461.2	12414.9	12576.5	11503.9	12752.5	1265.65	11987.7	10599.4
M596T248	20898.4	44523.8	34529.1	28596.2	23106.1	24216.6	16706.3	22400.7	19945.6	12884.1	8148.95	8625.11	9255.48	1953.99	3976.77	5724.79	2942.33	5965.83	7280.6	6449.15
M646T216	17604	20039.6	15055.4	18209.4	27139.5	17827.9	27252.6	26350.4	16337.5	18681.5	3159.73	2641.13	2142.67	2015.98	2228.2	2741.08	3053.33	257.224	2307.18	1741.21
M335T392	226758	239561	274771	229189	277079	218222	227788	199862	241114	210928	91648.7	48346.8	102282	48940.7	100240	46684.9	93246.5	42658	92333.9	45186.7
M663T246	72655.2	22992.5	23170.7	18454.3	44758.2	33996.4	17998.1	24723.2	35447.3	46875.6	4957.38	7860.85	5585.16	6420.85	11841.5	7782.54	2193.59	8941.72	13200.1	5839.31
M674T212	17787.4	10684	8195.38	11882.5	18436.7	13653.5	14403	14310.7	17157	26495.9	7458.58	2992.38	2578.67	2140.88	2962.89	3067.45	3762.83	2734.27	7389.26	6974.56
M505T182	25281.2	31606.6	27647.3	37903.9	31424.3	35184.5	32120.6	26506.8	29642.5	29645.2	9346.26	12504	9368.93	19726.8	7857.77	9716.17	14811.3	7501.13	9979.51	17109.1
M595T248	44811.5	88892.7	46984.8	79777.5	53940.9	25259.5	44766.3	61789.5	51548.5	28622.7	5120.96	9390.38	10741.7	2123.32	13794.4	10123.6	2490.32	9980.67	1826.06	3678.29
M543T206	164055	34546.8	49960.4	130123	44937.4	45345.8	139696	131955	38431.2	39110.9	7368.68	10530.8	7593.4	8199.83	8182.11	7679.29	9017.59	9005.53	6643.38	9263.96
M597T306	23838.5	19749.4	22217.7	15686.3	21255.2	17403.2	18957.6	21213.1	21331.5	16864.9	4294.17	7686.78	7280.67	4340.3	5117.95	3358.98	5219.27	9741.46	8807.97	9723.2
M439T214	5060.83	8188.24	7645.04	8884.47	8769.04	8395.41	4092.3	9190.59	2281.22	2146.75	950.955	823.729	931.914	760.045	1205.22	1151.22	943.905	1351.35	1163.57	948.16
M504T502	9110.48	5215.12	3840.12	3732.95	11450	7095.03	5015.26	5722.42	8907.6	5407.39	1586.67	1819.02	1813.87	2479.51	1760.37	2286.53	2590.21	2227.71	2193.96	2183.74
M721T251	24407.9	20356.6	22623.1	14821.4	33868.8	13672	13487.5	13888.5	22427.7	26177.7	8379.9	8007.39	12242.6	6427.42	10183.3	7091.98	7711.47	5128.99	8983.17	7152.99
M113T133	13361	5992.77	15438.8	22019.4	19736.7	19999	22856.7	9412.28	19650.9	14116.4	2276.4	1609.41	7021.43	3382.57	3471.62	4964.9	4320.28	4229.09	6830.44	2061.57
M139T342	5798.36	1225.5	5579.33	6479.27	2977.63	4995.07	4788.82	19927.3	2393.7	10621.5	731.087	621.651	571.072	338.604	521.005	704.637	837.616	634.794	413.693	293.595
M436T239	41751.8	76012.3	16513	36456	28963	108301	86088.2	85222.4	42568.5	92926.9	12803.2	8318.45	5591.12	6361.38	13505.9	11512.8	5650.47	14706.3	13495.2	11059
M206T324	3246.07	2060.73	3566.11	3566.51	3813.23	2741.58	2472.12	1832.89	1923.67	3355.6	1399.65	1518.39	1694.23	1659.28	1033.94	1055.11	1351.11	952.491	1001.61	782.706
M500T201	21087.2	27927.3	34641.5	23568.1	6646.08	24014.9	26973	16354.5	8934.57	15327.2	5533.74	6357.01	6567.53	3394.25	4391.81	5227.81	6120.26	2460.87	2655.22	3304.65
M743T190	249068	103035	140829	136064	108525	115923	93380.4	99201.3	92207.2	121499	72493.6	44427.3	67721.9	54796.1	61650.4	42931.3	51009.5	44506.9	57096.1	48773.7
M548T202	9279.64	8086.11	5738.09	6402.58	5229.72	8121.55	10769.5	14775.3	8559.13	9123.04	3004.81	4039.38	2774.06	2088.61	2637.2	3821.21	1657.96	5251	3373.4	3765.76
M288T211	54559.3	33435.1	49254.1	27442.2	40929.3	30815	27731.5	35926.1	45852.1	6645.01	5027.72	5570.94	7279.9	5757.49	5022.43	4518.24	5145.88	4359.66	3895.44	5533.29
M320T350	15471.3	24375.5	2152.57	25180.4	16368.1	27258.9	25092.4	26201.5	14942	28687	1996.47	2413.58	1502.39	2272.91	5573.06	1849.06	1009.21	1973.46	1900.53	2091.45
M512T409	13859.6	9872.62	11182.6	8900.53	9983.47	8499.32	9303.27	8373.82	9567.02	9947.1	3543.61	3959.74	3390.87	1219.16	2615.71	3930.76	3170.81	1486.38	3612.19	3717.02
M427T407	3980.05	7950.48	5592.82	6657.13	4109.97	4389.01	4794.33	8842.96	5799.04	3938.55	1612.14	2217.87	2616.44	1895.01	1818.71	1325.22	3356.46	1991.48	3638.9	1933.73
M717T346	13420.3	9875.74	13387.9	9720.2	8035.93	9012.64	9424.52	6005.73	7755.28	9420.29	5424.55	3943.21	5563.54	4329.16	4984.47	3647.64	2437.61	4392.34	2166.72	3903.68
M394T353	13532.8	30524.8	21480.5	12843.2	16259.7	18196.7	15263.6	5867.66	14900.7	11811.1	985.206	1456.08	1621.24	1283	2577.83	2245.66	658.374	1927.58	1729.37	111.515
M264T43	23489.9	25563.3	23405.3	24770.8	25605.3	32284.2	26641.8	23633.6	25976.4	24138.4	6310.16	3427.4	4320.53	4989.21	1271.16	8477.49	6028.96	3393.58	5961.2	6852.36
M201T258_2	11815.7	19727.3	19406.5	16601	18094.8	12409.1	16670	11343.7	13647.8	12985.5	1727.66	2249.86	2577.94	6341.38	2962.33	6711.71	6369.14	4134.33	1887.24	3955.41
M607T174	75529.3	69710.5	57604.1	68356.5	59179.1	67746.8	68929.1	72264.7	70303.7	78775.5	16370.7	22256.8	13730.9	33773.4	14431.7	27993.7	18389.6	35469.6	18833.8	35182.3
M730T485	4607.9	5218.43	9197.91	3975.26	3919.52	2536.44	5959.88	3542.32	4010.76	4092.52	1706.37	2176.58	2523.66	1463.23	1082.91	1369.16	2090.51	1094.54	2130.02	1878.84
M209T165	185985	205328	161302	129046	196287	179081	190808	181230	173919	216226	25636.1	51185.2	32556.1	59057.7	36563.2	97041.5	49457.7	101589	38319.1	50641.3
M600T190	18515.5	9540.29	10322.5	14002.9	15008.9	13049	9568.38	10638.1	12110.7	4938.48	1908.4	4737.6	3464.7	5527.38	1904.59	2390.76	4965.5	2154.76	5734.69	2357.38
M576T164	35112.1	34585.1	14808.2	38946.8	19167.3	28773.9	41701.1	17614.1	19915.2	52432.9	6097.47	6745.93	1501.86	5993.47	7824.37	7512.71	5093.81	5047.48	1530.73	9489.82
M622T258	14752.3	10100.4	10924.4	10983.5	11939	11927.5	10952.4	13543.7	11577.7	12629.2	1145.57	4790.87	3964.22	1429.59	3578.92	3262.81	3692.04	4176.64	2459.83	2479.37
M234T197	6341.21	22410	5198.08	23952.4	5264.38	26779.1	29404.2	32300.2	6702.89	4163.06	1008.01	1027.76	979.455	928.443	681.307	746.362	958.686	753.863	740.956	1050.26
M469T202_1	14496.7	13179.3	2359.61	14041.4	9069.75	14855	10464.2	14198.7	8892.8	15861.7	2053.48	1559.06	1833.09	1239.92	4615.92	1690.57	2090.79	1516.17	2131.55	5867
M189T160	144324	134751	112001	106985	119801	118601	123123	118009	128309	121253	32229.7	55279.5	28378.7	75062.7	30977.7	48454.7	27871	19713.9	33642.4	47901.4
M255T357	24793	16822.9	18519.9	16859.7	24012.1	19036.1	20967.6	21397.2	19385.1	19686.1	6042.74	2391.14	7004.01	2471.06	7199.17	2800.32	8101.64	2621.1	6421.7	2603.16
M497T413	15003.1	14952	34120.8	25252.4	15595	9921.49	27722.5	25493.4	28416.1	30889.1	6983.58	7331.1	8231.66	7360.93	8344.75	7164.93	4597.43	6054.61	8466.74	6659.39
M394T284	46994.2	39013.7	55469.2	43026.4	64756.5	46383.2	47970.8	41981.8	52360.5	39617.8	6384.01	1440.56	13181.3	1702.51	7601.9	1478.49	6958.41	1344.85	6228.18	2355.14
M459T195	69457.2	85533.1	37722.1	108891	32840.7	71912.5	21738.6	17230.7	25530.3	65980.9	8727.24	8834.65	10622.2	6431.42	10821.8	7177.24	7701.59	5954.97	6852.2	5562.05
M711T307	6081.44	9977.57	5343.84	13000.6	9894.95	6996.29	5233.79	7896.42	12435.7	11759.9	2232.26	4017.97	3250.25	3565.05	3097.2	3112.98	2237.53	4110.4	4849.66	4029.61
M336T392	26678.5	22365.8	26526.6	25483	31190.8	23005	25690	24930.7	26222.1	25080.3	12407.8	6020.65	12635.9	6729.93	13869.5	6333.61	12708.4	6273	12008.2	7393.54
M146T358	27993.1	52400.5	30432.4	63878.9	31023.1	51373.5	54957.5	55010.3	25241.7	49826.3	6345.05	14585.5	4014.67	16065.3	3395.33	15114.1	6063.99	13711.1	5728.44	14928.2
M235T55	313125	693289	719684	954262	1.09065e+06	1.61341e+06	214337	455393	195732	411014	65682.6	217659	107493	106833	93022.5	75802.6	91276.4	84383.2	33336.5	79122
M693T409	29827.2	20618.1	21643.4	20618.2	21774.9	22212.3	22087.4	23689.8	23734.6	24221.7	11144.5	3818.93	10623.3	4978.25	9639.33	4652.02	8987.7	4423.06	9870.95	5307.71
M663T250	25502.1	11463.6	17689	39940	27542	17827.9	16945.1	25718.5	14378.8	20173.5	7271.68	4172.02	8369.35	10727.5	8920.06	3245.06	5174.2	4694.79	9737.7	8933.17
M503T194	24354.6	31176.7	39820	34225.3	34695.2	18097.3	50216.8	32061.3	17401.4	16558.8	5848.43	7939.84	1455.34	8773.1	7929.91	7613.96	7775.09	2713.6	7784.24	8696.84
M441T219	7699.71	6786.28	8183.04	5173.96	6783.54	13298.1	1689.62	8319.54	9112.97	6728.24	1308.68	2231.61	1698.78	1088.96	1477.11	1674.32	1166.71	1686.85	1817.43	1780.09
M360T362	16928.3	6611	13739.2	10739.1	12739	11182.2	4976.04	15955.1	7764.71	4749.85	3145.85	1702.01	3942.08	1595.98	3584.97	3969.1	1583.11	4009.35	1020.59	1389.32
M695T409	6603.93	3851.79	4870.42	6144.69	8542.51	5368.81	3354.4	4039.2	3903.58	3703.38	2344.1	1591.47	3445.01	1901.74	3197.47	1938.63	2122.18	1405.82	1694.02	1530.8
M441T358	4985.37	8826.38	6926.86	7301.25	9753.03	9829.45	12286.8	7537.72	6896.37	5815.74	899.139	2605.89	1787.02	3960.69	3275.67	3350.58	3571.88	2590.48	2910.75	2461.68
M504T190	7090.78	7886.19	8126.88	12069.6	10371.1	9329.3	7083.89	6965.95	15374.4	16769	3373.86	4114.44	3627.07	4091.71	3733.14	3607.39	4786.81	4713.09	3866.09	5014.88
M276T343	5090.62	4474.91	1295.51	5256.98	5954.56	6480.91	7285.02	6342.81	6104.76	6485.64	1424.32	985.89	1338.79	1278.82	1026.41	1740.08	1294.5	1607.92	1378.09	1148.02
M756T193	29946	30831.4	36290.6	42299.7	29553.5	12825.8	36383.5	38136.9	9424.55	34848.8	9665.65	9442.28	7778.58	7659.38	15640.6	6397.92	6452.96	3791.21	6513.94	6270.34
M269T172	46194	13582.7	32518.3	16833.3	35976.5	20476.8	19032.3	21509.7	37379.8	23784	10237.2	5135.5	6601.28	1398.47	7411.79	3117.47	6558.3	3884.74	8492.7	8213.74
M138T196	42296.7	36775	65359.4	39728.3	64961	36684.6	35630.4	22846.7	34637.1	45625	9965.36	2178.61	11799.8	9110.32	12336	8055.16	10780.2	8669.35	11647.1	2378.07
M257T273	28747.9	45082.7	63766.2	45164.2	65371.1	44091.1	51535.3	80935.8	132278	37953.3	11546.1	12535.4	19268.4	25886.3	21782.6	16847.8	20361.7	16107.2	26141.4	17181.2
M212T220	145256	48579.8	10407.9	12067.2	8768.19	17330.5	164181	297574	110560	130423	2545.28	323.339	114.601	139.401	74.2692	653.62	4408.28	4006.66	2121.26	2467.28
M421T212	4065.11	2266.09	2487.11	3120.45	2895.94	18236.7	3739.06	3751.91	2854.32	4072.02	741.462	727.982	610.415	609.347	688.367	790.506	801.393	684.895	584.605	791.629
M116T172	9732.81	10452.3	5688.07	7536.16	10265.2	10283.4	9140.82	10069.7	26617.8	10920.8	3544.93	2232.61	2370.82	3134.79	3218.52	2530.08	2035.94	4995.47	8425.03	2662.36
M633T500	37196.5	20951	38313.8	45420.6	14736.5	38881	7874.54	26914.4	13915.2	27954.2	4954.22	6459.56	4543.42	3738.14	3707.47	11038.4	6530.48	6939.93	7030.34	5449.51
M411T407	16416.4	7562.77	14429.8	9680.94	15708.5	9575.99	8632.49	10301.6	15910	31514	5627.41	3069.02	4553.2	3881.69	5112.4	4282.8	4999.66	3378.57	6051.38	3543.51
M575T215	11697.4	26720.9	3698.89	5134.42	21580.6	12429.7	20804.5	27729.8	22565.1	13403.7	1665.44	2287.17	1594.09	2126.2	2033.99	2386.71	1737.19	2378.65	1796.42	2141.37
M739T173	58566.1	40215	58855.4	55030.4	40449.2	32951.4	35290.7	47998.6	56017.8	59645.7	12921.2	14647.8	29218	17452	18327.9	9562.48	22164.5	9228.69	24848.8	7672.43
M616T229	3076.85	3983.51	10982.2	3769.1	3242.72	2958.73	5015.8	2036.88	3685.78	3902.39	1015.75	2399.05	1554.83	1117.5	1063.17	1193.27	991.395	1340.64	1615.14	1174.88
M555T203	33344.7	30712.6	33529.5	34090.7	23932.4	26450	32624.5	33310.3	32305	26695.1	6230.34	6803.04	6082.31	1691.46	6607.42	6128.37	17722.9	7467.85	7856.42	6536.08
M740T320	6465.96	6555.04	6005.98	5345.54	5661.97	6136.07	4973.14	7663.64	7655.45	6017.39	1699.91	689.973	2495.73	713.026	2629.91	812.93	1703.55	822.327	2781.14	1061.35
M463T221	6062.49	8594	3045.47	10563.3	3261.61	4101.22	2423.92	3773.86	2501.7	7903.59	1086.54	1209	1620.28	1042.67	1111.46	971.124	1264.63	953.715	1046.22	961.133
M791T507	3606.64	4316.19	7493.64	1802.66	3469.02	4171.49	3183.76	2092.27	3750.8	2154.65	1157.16	1709.93	1575.35	1401.87	1225.66	980.713	582.52	1033.13	1225.88	1243.08
M673T212	27295.2	12090.2	19584.6	27265	33674.7	23346.8	16382.6	40641.3	35838.4	26117.5	15956.7	5422.17	13354.5	4703.92	6246.8	13725.3	8512.18	8027.79	7785.63	6499.16
M162T490	3232.85	3076.8	2164.81	3116.26	5098.34	3342.6	969.949	2935.24	2150.63	3359.99	1006.88	963.009	854.047	760.716	734.892	855.978	1167.47	800.305	771.155	959.624
M592T177	47849.1	37580.2	23242.8	12851.4	14968.7	77117.8	26606.6	27651.4	27910.9	44158.1	11129.7	14343.1	7810.58	2713.97	6616.8	5401.3	8144.98	10564.2	6794.5	7942.54
M594T410	4813.22	8469.49	5014.39	7160.11	4962.64	5777.59	4874.23	6239.41	4047.4	6159.53	1729.4	3117.99	2266.92	2926.32	2221.87	1620.19	1155.89	1817.47	659.863	2109.18
M400T224	11833.6	9641.82	18581.5	10179.9	19736.9	5282.71	7151.24	7855.11	15273.2	2459.53	1720.33	1507.3	2424.52	1637.83	1960.34	1497.93	1759.97	1475.29	1870.65	1579.17
M613T182	35988.8	39747.5	40746.7	32317.8	35387	36898.4	33438.9	50951.2	42275.7	8888.72	7064.41	13500.6	11624.7	5699.17	10572.6	12330.9	12779.9	14034.1	11510.3	4316.11
M528T477	11254.8	4395.85	7247.4	5022.06	5284.14	5902.41	12623.6	5706.26	10914.7	5624.08	2557.97	2497.17	6208.78	2664.45	2408.27	2265.71	1923.65	2083.24	2130.73	2956.12
M314T247_2	38824.1	20657.1	45310.6	25023.6	38177.5	20491	25006.9	18300.7	36062.4	18457.5	15876.4	8123.21	11735.5	9325.11	14562.5	10227.5	11807.6	7234.03	18247	10370.3
M940T227	26943.1	21266.3	27679.7	28305.6	19702.6	12984.6	17548.3	18534.7	16271	16639.1	6435.46	5973.36	10852.1	3227.42	5449.96	3729.05	7510.55	4051.78	4714.6	1234.97
M174T106	56595.2	34242.5	43965.9	34495.9	40135.1	35332.6	43129.6	42328.7	48452.8	41658.3	14267	19269.2	12116.4	19568.2	13621.7	19941.8	16965.7	18513.1	5183.93	18332.1
M175T107	5332.58	5246.14	4692.7	1563.7	5073.19	4601.51	5892.03	5043.01	5014.99	5511.32	1301.43	1780.78	2890.28	1217.45	1079.39	2241.61	1787.98	2254.04	2147.97	1103.79
M273T429	9805.64	25594.5	9499.01	19640.1	11130.8	28868.3	15133	15799.6	10890.5	17582.4	4157.81	482.706	3340.7	415.907	3258.68	1926.08	1203.64	885.191	4433.87	2868
M563T213	18843.7	15192.5	11536.1	14683.3	16190.3	21812.4	23631.6	27470.8	24386.2	21905.4	5521.28	7591.84	4854.17	7153.78	7929.22	10663.2	10310.4	14583.1	9361.15	9343.78
M638T411	3305.82	4000.57	1722.73	3596.18	2450.5	2753.31	2707.46	2914.69	2136.36	4773.15	1203.29	1156.92	1283.51	1389.8	1593.56	1818.61	691.08	1410.5	1522.65	1694.05
M937T321	7594.4	6246.33	5547.33	14008.6	9786.42	18973.6	10825.2	4757.95	9675.63	11654.2	3178.27	1169.09	4175.76	1627.32	4729.44	2519.19	3783.03	2479.2	4162.68	2387.95
M453T224	6879.89	4591.74	8672.83	4745.62	6602.97	6501.58	5614.19	4075.38	7138.62	6827.52	1002.5	1207.24	976.953	1173.89	1128.83	1402.06	1162.14	3516.88	1520.95	5053.04
M633T185	7874.02	13181.6	13126	13396.3	9373.65	11864.2	11846.6	10621.6	12667	11673.8	2937.14	5899.07	3312.4	5595.63	5463.35	4526.92	1397.03	4519.3	4447.23	4343.03
M508T216	12557.1	99944.2	77194.5	24195.2	20094	10698.3	17715.1	17034.2	16975.2	13617	1521.49	20179.3	6640.93	2133.52	1850.14	2021.5	2086.96	2409.46	1833.01	1691.6
M347T436	10893.6	9059.81	7161.44	10116	12720.2	13786.3	81388	18662.7	6680.21	10728.8	1776.13	1379.56	2035.57	2637.88	1459.77	4515.08	6725.21	2060.47	1403.68	2660.58
M691T497	22954.8	23019.5	28954.2	4793.05	4774.42	25290.1	7892.18	2922.46	8462.7	19392.7	1707.62	1349.26	1469.77	2605.36	1600.23	2068.06	1420.81	653.003	951.246	2402.25
M372T189	28469.3	13698.7	24168.8	19050.8	25511.3	32189.8	19878.5	25588.5	52393.2	20143.6	6143.61	5366.22	5487.42	13527.4	16338.6	9570.54	9507.7	12333.8	10768.6	7821.5
M165T313	35489.5	59533.5	45396.6	50780	44198.4	53483.4	51377.8	48868.4	37753.4	54461.8	4163.72	385.671	382.728	5027.24	5252.37	5008.94	3767.17	5188.38	4501.77	4997.33
M563T223	32667.7	47026.9	91280.4	47584.9	100568	138109	115405	105895	31470	37850.1	13793.6	16188.2	17180.6	14967.5	16219.6	13336.6	17406.9	12264.6	13472.1	14728.6
M351T222	3989.68	13305.9	7709.8	5555.32	7216.65	5911.97	4451.11	1913.21	7477.73	4824.86	1117.28	3335.32	1480.03	1373.39	2291.35	1572.71	1135.09	1735.78	2326.36	1350.1
M608T174	29018	13345	24667.7	19438.4	12726.1	16501.7	26746.7	21275.2	17778.2	12315.8	5010.93	8863.52	5981.66	9068.73	5611.61	13779.1	6593.36	9728	6259.8	11853
M140T271	107946	296191	234655	222445	217209	240067	173366	198653	148920	128721	60237.1	114539	82463.9	106227	94805.4	81194.5	96654.3	119084	89442.8	77249.7
M728T321	1390.99	10703.1	8071.94	6122.71	10762.8	10628.3	13680.8	4365.98	7285.92	3033.75	1007.74	977.55	1065.57	1041.83	1004.14	1465.75	861.375	1195.49	888.474	1365.31
M137T166	491431	517323	517154	530171	532456	624203	614988	646071	530621	613580	313179	120580	265693	305836	133820	286786	310544	282271	226537	226382
M424T136	3978.9	4807.26	2640.33	8300.5	3306.72	7776.3	9341.82	8145.85	3489.74	9817.68	2448.79	869.96	1689.06	1518.3	1633.96	2101.51	1539.38	2070.86	2411.83	2075.13
M240T34	38542.6	36285.9	61008.5	35692.7	42068.6	34392.1	30740.2	26015.6	39558.9	26235.7	9456.03	14419.8	13541.7	2230.19	10697.2	4970.84	11424.5	3047.95	11367.8	4426.69
M340T167	11882.3	72466.7	10904.2	69850.1	11885.5	73095.1	74467	72058.2	10956	74313.3	2472.51	2798.89	3405.71	3711.26	3270.48	3741	3005.36	2548.99	3822.81	2169.25
M376T369	4578.49	7487.67	4915.33	9199.5	5352.7	8014.19	7855.13	9079.07	5196.31	7874.98	2713.75	1838.56	333.333	1775.66	739.103	1904.4	2141.55	890.358	2380.37	1866.3
M628T202	16016.4	16984.5	6955.39	10360.9	14860.4	2969.62	9880.9	14447	17704.3	13125.4	4592.77	2690.9	3609.23	2205.97	3074.02	2073.21	4046.32	2303.13	3891.42	4182.74
M439T358	13503.9	6710.3	17178.3	8883.36	5953.97	7121.22	5732.94	4967.7	12954.9	9151.36	5236.02	3978.64	3636.64	2239.4	3615.63	3270.06	3950.6	2499.23	3012.56	1659.73
M373T286	2244.78	9978.82	6965.42	6863.4	5156.28	5424.91	5386.35	2259.32	4860.05	3764.68	2361.34	2431.46	2269.16	1703.67	1848.08	1116.7	1048.67	796.172	638.919	1240.55
M419T170	33484.7	241066	105610	9647.46	51111.6	86049.4	81050.1	89285	48455	61537.9	5847.92	17745.8	18403.7	8976.39	7557.8	8901.79	8065.34	5176.5	9172.06	6420.41
M451T247	22442.7	70078.2	27567	64936.8	28424.4	64822.6	67466.2	58119.7	25609.8	54039.3	15944.7	15439	27420.6	9794.7	22582.6	11278.3	13178.7	11990.2	16708.4	12450.8
M606T202	17642.3	7849.5	5383.72	13188.9	11672.1	14540.4	16719.1	13913.6	13356.8	16649.3	6403.95	3963.76	4198.98	3810.22	5811.17	4198.17	7429.2	5851.9	6750.75	5612.6
M575T182	134311	96613.1	118140	19909.1	95228.6	112663	66405.2	130340	119193	71724.4	18182.1	39118.7	10513.9	26790.8	26384.3	16468.9	15260.3	35497.3	41587.4	16761.6
M252T54	602502	348421	248670	295125	270540	488176	748688	1.41684e+06	1.79121e+06	1.68686e+06	55395.8	55345.4	41671.6	51753.7	53265.1	97017.8	143517	243407	246368	163808
M469T341	8862.41	9476	10207.5	9458.66	10641.8	9130.79	9435.33	9411.51	10471.9	8064.95	4112.84	5950.93	4232.57	5772.8	3882.72	6093.23	4122.88	5622.85	2275.22	5421.53
M254T34	33156.3	18522.2	32012.5	13874.2	24701.1	21112.7	27019.4	18984	53389.4	17805.9	9084.52	5280.57	7089.43	3237.46	9224.81	8272.39	15439.2	7230.74	16262.6	5931.67
M577T373	19715.3	18649.3	17642.5	18578	22733.5	19933.2	20477.9	15064.5	22094.3	18622	11856.6	5143.79	9198.97	5125.8	11134.2	5469.81	10798.8	5551.24	12697.3	5995.69
M274T231	5445.37	2117.94	3697.17	1891.34	2836.88	4630.85	3807.95	2371.32	3824.79	8809.3	1051.54	1210.66	1599.62	1137.01	892.684	983.993	1405.83	1473.04	1328.03	1292.61
M207T170	97931.7	242315	256951	233107	272231	180978	265508	237351	197158	123949	16838.8	91679.8	59151.1	85528.7	74512.5	94566.4	74472.5	76772.2	45094.3	31231.5
M597T218	18541.1	3355.45	25869.1	13330.4	13408.2	20821.3	16231.2	15781.4	15942.3	15791.2	4629.06	3390.69	6073.86	3167.52	4771.37	1782.56	4052.21	5298.33	5568.87	6013.57
M574T241	72077.3	49531.3	64128.6	61160.7	68557.7	53174.6	46863.8	9974.38	22038.3	25957.8	13122.6	11037.1	10175.5	13368	10726.6	9524.91	7607.17	6332.61	7687.14	10002.7
M680T248	23845.8	14465.3	12788.5	21491.3	12279.7	22232.6	26844.6	24491	12737.1	28668.8	5960.8	767.918	1935.66	3760.03	3126.5	4137.82	3859.31	4804.81	7700.04	9983.22
M623T270	25106.7	20787.8	19850.4	20383.6	22860.7	25425.2	27175.2	27399.3	24922.3	25359.4	6998.94	10786.3	6397.22	19459.8	5593.94	3612.4	7813.97	9944.56	8807.93	11221.5
M272T355	4959.96	3152.28	2160.12	2951.71	2291.95	3852.09	7284.89	3425.74	1596.41	3351.93	1974.58	2184.09	1290.9	545.663	1104.78	1050.02	1390.84	765.147	655.208	626.571
M293T340	150729	57789	108753	71282.3	50842.1	154460	43319.4	36894.9	86611.8	139975	20770.9	27084.2	20323.6	29413.2	20087.9	26919.5	20277.7	31250.3	20920.5	28310.4
M578T189	77064.3	30973.6	49033.8	35137.6	61724.3	40833.2	38376.6	43706.1	69701.7	52125.2	8128.2	13178.8	5555.1	18808.2	9603.01	14258.9	9609.57	20523.7	1954.84	18235.8
M530T218	31850.9	6773.29	14079.8	13001.5	12374.3	10159.7	4429.62	9082.59	5911.35	4535.96	7886.47	2220.02	2486.79	2277.03	2556.93	2776.41	2016.12	1727	1269.56	2395.76
M381T367	3231.31	2927.71	1907.06	8542.8	1932.1	4103.5	7006.49	7044.46	4148.9	6252.02	771.05	570.393	2234.5	2075.13	957.854	1460.23	1653.27	1222.36	1153.14	1310.07
M398T377	32974.8	29080.5	45444.6	186986	120029	37106.8	98657.8	188214	103201	45486.3	10744.3	1975.27	10334.1	31395.3	8855.36	3961.5	25412.6	25495.9	9371.78	4570.85
M437T151	57726.7	129531	45716.9	115669	55660.9	214898	140356	238861	99266.5	203352	29700.4	70572.8	48340.9	15757	25944	28481	26677.3	33621.4	36327.4	19538.6
M853T506	2419.64	3744.36	12052	2731.73	3068.88	3426.62	2985.91	1831.51	2035.93	2266.16	852.041	1899.83	1602.97	1007.67	1066.79	1234.47	692.303	624.67	385.516	621.182
M385T333	5337.8	5637.07	4681.08	6158.38	7340.07	5730.26	6072.3	6994.25	5604.75	6285.48	946.032	2477.18	1990.06	2366.75	720.104	2897.78	2129.02	404.38	938.228	1083.85
M399T285	84059.4	77543.7	104967	79729.3	101692	73914.7	74206.8	59537.7	100236	62405.1	31754.7	5423.54	31146.6	5935.16	34007	5839.89	12695.7	6565.44	30179.7	6553.94
M221T169	32944.8	19946	19833.4	41004.8	22505.9	25037.6	40355.7	27437.6	21337.3	29725.5	1035.38	1516.33	880	1744.95	6288.93	8848.16	8175.73	1957.52	7259.53	9780.74
M592T190	23387.1	11702.1	11409.1	14462.1	16245.2	15192.5	14752.3	17890.2	21216.2	22944	5711.92	3222.32	4956.59	1913.52	5670.51	6297.03	7573.16	8256.59	2059.87	10632
M252T324	2105.93	2063.15	1434.06	1531.34	1516.95	2605.09	2085.67	2161.91	1960.36	1625.2	848.364	467.113	711.903	446.725	590.326	1042.19	1111.86	1162.46	1269.75	1179.56
M477T244	24322.8	52144.2	57236	28208.2	20011.6	21012.1	16841.4	17193.9	28427.2	20365.1	11448.2	11269.3	21732.6	8523.26	11452.4	7891.62	6920.58	4152.55	10678.1	9823.16
M431T246_2	30001.7	44418.1	21694.7	45295.6	24606.5	17146.5	41612.3	44195.5	30844.9	4541.11	14592.3	5901.22	8174.68	1895.05	5887.95	5053.31	5469.19	6683.88	5536.02	7503.1
M609T243	20827.5	18620.5	30494.1	13947.9	32959	11010.6	41293.9	66052.6	29714.4	56258.7	5780.25	8352.9	3878.04	6570.65	3649.72	8097.49	9585.33	12154	14910.6	14145.4
M162T352	31524.7	26981.7	35442.2	29175.2	36892.4	25474.2	23561.6	22395.4	32794.5	22652.7	6497.89	16971.9	4821.3	15212.5	5926.89	15266.7	7181.66	16830.9	7447.53	14890.2
M241T321	83817.1	23121.6	81684	30765.8	100123	85191	92541.4	26619.2	84085.4	75883.8	17510	17421.4	13940.4	17117.3	17781.4	20140.8	17251.7	16756.6	20152	16992.6
M905T309	4915.2	6902.22	7482.02	37245.4	6684.56	32012.4	1718.55	27182.8	41490	27315.2	924.144	1704.1	1265.53	1769.22	1250.89	1029.4	2336.3	1237.04	1108.99	896.13
M356T222	5098.1	6167.89	4824.59	22695.3	15456.5	8109.87	9021.48	8448.86	7196.57	20439.7	1970.64	2608.1	4775.31	6662.99	3487.2	2883.41	2395.67	2630.09	2233.77	2563.47
M627T202	26066.3	18578.7	18865.4	21375.7	20101.1	27730.5	20835.1	29912.8	10218.6	30687.9	7237.5	5483.84	8690.82	6797.89	11114	6810.38	11770	7525.13	2178.63	14744.1
M384T195	555815	272389	50025.4	208123	27518.2	26494.8	302612	207451	275989	630095	13463.4	12400.5	18818.1	12284.9	16634.2	10490.5	14977.8	11406.4	13127.1	10839.6
M509T223	1944.21	2023.19	1460.45	1068.84	2033.96	7030.3	1777.08	4579.11	1899.94	7814.02	708.751	576.281	519.342	581.087	449.542	679.511	460.726	793.188	893.62	941.165
M546T414	5395.73	3753.64	1672.69	5725.25	1412.49	1959.7	3574.67	1646.14	1384.42	3327.37	989.909	581.124	911.752	992.641	846.961	1063.12	770.415	678.449	775.385	1064.87
M573T169	46881.2	26184.2	36044.5	20341.8	38969.8	34420.9	37354.2	41115.9	41671.9	31319.8	27211.6	11043.5	23000.9	6066.11	14583.3	13779.6	15942.6	15002.8	18521.6	16829.2
M556T165	38953.4	19559	20434.8	35106.1	34712.6	19188	39057.3	37287.1	17525.1	37638	7758.39	5092.88	10588.7	14224.9	11128.4	2105.26	8385.3	8867.83	1349.46	6524.08
M491T267	20509	17277.2	13647.5	16933.4	16315.9	19465.8	28028.1	24600.8	16163.5	16435.3	15668	3911.24	11519.9	6277.08	4147.82	7845.66	5874.89	6919.77	4674.46	12240.4
M202T257	2422.49	12316.9	13288.8	6866.91	10859.4	9283.23	10716.1	4167.17	5755.71	2080.18	1294.21	1352.01	1166.25	3066.72	1938.78	2018.21	1583.95	2270.1	1213.73	2023.58
M823T320	3687.39	4401.38	1891.4	6568.96	2741.73	6871.47	5199.4	4108.34	2697.11	7014.38	1385.18	1850.08	1338.55	2474.69	1122.58	2153.47	1007.26	1520.26	1673.68	2900.7
M216T319	12963.5	61068.1	27782.1	58269.9	23794	37345.5	38316.8	28722.2	11892	27854.8	10082.2	10054.7	8977.01	10221.9	8905.24	9718.65	8211.29	7467.26	8739.37	10652.4
M179T159	44661.3	111986	53933.4	60320.4	91446.7	52390.8	52246.9	59780.9	44503	39763.7	4270.5	27621.1	5470.52	14229.2	17956	20989.9	19784.6	21398.6	2450.92	11520.7
M493T247	11410.7	17483.5	15430.5	14248	11152.3	10391.8	24774.9	25129.8	17024.2	9270.61	4995.71	2931.82	8772.47	4406.62	6039.26	4744.28	11325.4	8981.42	2119.02	5351.42
M489T261	36839.7	39894.3	48331.8	68152.3	32689.8	40373.5	41132.3	40405.7	42579	48103.1	25946.3	21495.9	21108.1	4596.67	10002.3	17148.8	21736.1	20997.4	9523.45	12408.3
M291T439	8981.95	49311.3	2088.43	48092.4	8831.02	50487.8	46300.7	54307.2	6920.17	55144.8	1903.59	1674.91	1955.08	1810.95	1666.16	1964.81	1675.79	2047.18	1698.06	3102.49
M383T327	6429.55	8793.69	6159.98	13735.5	6731.79	10773.2	9474.92	12192.8	8828.26	3535.57	2761.93	2329.98	4384.25	994.34	4751.44	4791.21	2719.03	2167.97	4025.21	4106.75
M436T199	25575.2	15387.6	13276.7	21998.8	16284.8	24549.3	19103.8	25757.3	19768.7	26979	5033.04	7986.1	4779.78	4805.1	1114.6	10069.6	9686.13	9998.62	4906.09	7922.04
M435T203	8425.31	156863	115602	198462	229190	254004	7161.7	268601	223602	147722	6669.61	5009.86	7186.58	8178.73	6932.19	6676.72	11045.6	7195.87	4644.23	4775.94
M732T230	21295.4	6117.57	6930.56	4905.3	4264.9	8838.37	13998	5114.07	2958.31	7959.5	2685.13	2199.26	2920.72	1589.44	1828.53	2774.42	4682.92	908.025	1536.78	3203.66
M318T209	4155.46	12648.5	3032.88	17839.1	4188.39	19924.7	16871.3	20887.6	8874.67	12695	1668.29	1789.34	1917.44	2292.31	3069.33	3786.14	3902.68	3559.87	2982.27	2122.89
M513T182	34919.1	41500.3	56790.2	75200.8	61018.3	5750.31	43704.7	47609.4	38218	39672.7	12213.6	4788.87	7023.53	13647.5	16607.7	12468.6	13968.2	5471	12376.5	11749.6
M378T217	92182.4	107321	120083	4370.6	142533	50517.7	99215.3	177330	114923	73957.2	37108.5	4753.76	2216.85	4973.62	26105.9	7809.12	32537	6151.41	3701	8184.24
M620T500	30664.1	45653.9	23656.5	21059.6	8990.14	7754.91	3946.08	14182.7	5866.98	13192	7023.64	5969.17	3013.58	3126.92	1436.53	3640.28	2138.25	3419.44	1629.59	4833.71
M209T327	4890	3961.32	3257.69	4924.77	3617.97	4172.9	989.245	4852.23	3585.44	4166.45	1282.43	1432.43	1694.39	1365.82	1556.95	1625.93	1718.34	1162.05	1544.11	1452.11
M346T223_1	7600.43	5095.7	4805.76	2291.71	8218.69	14371	9341.09	2813.77	5122.6	11139	1665.77	2112.3	1791.63	2420.07	2728.44	1782.42	2026.79	1937.75	2069.37	2371.82
M293T199	93713.2	121784	143230	113815	131977	114027	133197	85358.7	3365.22	96766.5	9306.32	8716.53	9043.83	7459.75	10343.1	7807.68	17479.5	10852.6	6694.85	23800
M329T326	3006.68	1933.96	1399.6	2087.27	2372.55	4680.05	3986.45	6606.96	6461.07	4546.48	1669.02	1106.22	945.854	1285.2	1018.23	1067.17	1087.02	1345.83	1462.38	1946.69
M138T167	16480.3	47579.7	43007.4	39272.7	36871.7	35214.8	38270.5	35493.3	30371.7	19848.8	4233.55	5400.16	4348.36	18192.9	21925.6	16481.3	16696.8	4812.65	17495	6663.65
M729T321	3198.21	3470.97	1156.41	2672.19	3261.6	6542.56	2962.17	2482.6	6296.6	1861.08	1119.45	1231.03	948.875	1413.63	761.154	1499.86	969.398	1658.31	1310.22	1483.31
M291T342_2	7321.91	5238.91	5974.06	5557.33	7248.34	6587.51	6008.06	6559.64	4597.32	6739.06	1042.5	2572.79	1231.4	2498.59	1821.17	1793.31	996.659	3441.32	4997.25	4392.77
M709T306	2844.5	3725.73	85328.2	48871.8	72192.6	47057.7	45900	3136.03	67493.7	42605.9	1761.29	1887.73	1883.94	1487.11	1848.19	1817.5	1909.6	1477.94	2033.81	1479.83
M459T219	8842.74	6170.73	6149	11587.3	53885.5	6745.41	10480.7	38472.6	10157.1	6838.04	4089.89	2022.04	2595.79	2963.3	3311.78	2904.67	3389.07	2575.21	2841.53	2604.73
M229T320	34388.8	97946.8	130732	67609.7	150122	142674	29893.8	87909.5	90775.8	144423	32886.9	25143.4	27280.5	27334	29277.1	29940.9	31496.3	29738.2	31208.9	31958.4
M190T161	19348.3	17099.7	16137	14860.1	17516.9	16463.1	19211.4	20300.7	17558.5	18455.7	1877.46	7292.16	9055.02	3484.33	7855.78	10948.6	5921.56	13444.4	5280.14	3724.93
M253T356_2	10253.7	8563.2	9623.03	7341.88	6854.45	7365.57	12455.2	7913.35	6891.36	6163.09	5023.09	3710.64	5114.97	1053.14	4540.51	3034.21	1582.09	911.279	2290.46	3710.91
M279T262	329097	315128	168075	248798	372041	274376	122223	76937	238261	239892	92899.9	121929	61738.2	62744.8	62687.9	122350	96180	121881	97854.7	111888
M543T447	17181.2	5268.22	10051	7798.15	12224.8	9449.76	7744.77	5142.67	9529.17	16389.2	3686.62	393.959	2061.65	2487.19	8614.08	1725.57	1537.01	1598.94	3815.35	3675.46
M575T151	32546.8	42785.1	16614.9	43198.1	20794.4	22544.2	49103.8	54898.1	31091.5	113821	15337.6	1165.09	14363.5	4114.99	14965.3	9018.97	5525.02	4626.94	20000.9	13867.1
M340T431	2173.71	7082.69	6272.3	8108.47	2534.89	3327.28	8846.09	6109.11	1711.64	4157.99	2206.23	2389.34	1402.58	1711.32	1273.51	2177.56	1724.31	1771.18	1042.09	953.576
M634T251	33568.5	18007.8	9693.1	7562.8	7448.87	20539	28540	71083.2	18768.6	9430.08	6640.69	2361.23	1752.63	2299.02	915.238	6863.76	14858	7623.39	935.66	2327.36
M365T329	15249.7	12888.5	13747.1	15378.9	2295.71	19133.4	16418.1	14473.1	14403.3	20260.3	6387.31	3196.69	4009.55	4835.88	2703.43	6295.77	4819.77	5377.13	3417.45	5258.59
M141T135	60303.7	5443.14	26760.6	12965.5	33807.9	23042.4	23902.3	33536	57965.5	40764.5	8495.33	5900.93	5399.83	7236.58	7387.9	8388.53	8050.06	8965.71	8154.1	9557.54
M292T439	2609.87	9843.96	2071.87	8746.91	2677.48	8586.83	12585	10234	2528.28	9359.78	1586.47	1526.29	1887.85	1589.58	1592.45	1455.94	1458.46	1786.73	1692.59	1508.81
M637T367	3104.43	6062.2	6064.37	6132.08	6906.17	6101.18	5602.9	4911.92	4530.2	4822.31	850.556	3982.86	3185.7	3692.26	1395.61	3567.76	1451.52	952.507	1310.08	2512.84
M361T252	46136.8	25671.3	18530.7	16383	28103.8	9666.69	13469.3	40205.9	64455.6	14679.1	9900.62	4984.97	5257.22	6335.75	7642.01	3484.49	14166.5	4757.58	16166.3	14934.7
M406T136	4777.35	33933.5	9497.93	25557.3	8850.51	26776.5	22167	26218.1	8761.06	28879.2	4315.36	7631.44	4690.47	6114.38	3575.85	6193.53	4248.88	6847.02	4744.93	6048.78
M412T157	87231.2	67567.5	286088	127378	173799	67919.9	145109	90496.5	47230.3	67946.7	28020	43131.1	29654.6	30551.5	24488.4	68982.5	59111.9	26774	33370.3	80254.7
M589T248	53304.5	41980.9	4007.43	81475.8	82719.4	52624.5	43459.8	58925.8	64540.9	64387.5	3753.41	6354.11	15835.3	23076.3	14569.8	9796.54	6677.38	16010	13513.8	8373.51
M379T444	8602.87	11799.2	10395.7	12475.7	9818.83	12368.6	11142.9	12786.5	11311.3	11519	4455.53	2110.49	1954.92	1599.08	3413.46	8459.56	1473.71	8874.21	4445.79	6823.73
M155T35	24217.4	86598.2	61056.2	30689.6	19701.1	48349.6	36773.2	26434.5	22440.6	48909.6	7517.91	17735.3	12322.9	7469.97	16802	34942.8	11867.2	2467.8	14856.4	10659.9
M707T494	2133.81	7669.07	12475.5	2030.48	4201.3	987.039	3366.34	5271.58	3169.68	1283.37	826.325	1261.89	1236.55	894.747	775.914	520.442	957.762	1079.11	1024.59	740.058
[truncated: 5,656 more rows]
